# Supplementary material for: The HIV-1 Tat protein recruits a ubiquitin ligase to reorganize the 7SK snRNP for transcriptional activation
Source: eLife journal article supplement (doi:10.7554/elife.31879), 2018-05-30
Supplement: supp [file elife-31879-supp-v1.zip]

Archive with 12 entries (12 files):
- elife_poa_e31879_Figure_3_figure_supplement_1.pdf
- elife_poa_e31879_Figure_7_source_data_1.xlsx
- elife_poa_e31879_Figure_3_figure_supplement_2.pdf
- elife_poa_e31879_Figure_7_source_data_2.xlsx
- elife_poa_e31879_Figure_1_source_data_1.xlsx
- elife_poa_e31879_Supplementary_File_2.xlsx
- elife_poa_e31879_Figure_1_source_data_2.xlsx
- elife_poa_e31879_Figure_1_figure_supplement_1.pdf
- elife_poa_e31879_Transparent_Reporting_File.pdf
- elife_poa_e31879_Figure_3_figure_supplement_3.pdf
- elife_poa_e31879_Supplementary_File_1.xlsx
- elife_poa_e31879_Figure_2_figure_supplement_1.pdf
