# Supplementary material for: The HIV-1 Tat protein recruits a ubiquitin ligase to reorganize the 7SK snRNP for transcriptional activation
Source: eLife journal article supplement (doi:10.7554/elife.31879), 2018-05-30
Supplement: supp [file elife-31879-supp-v1.zip › elife_poa_e31879_Figure_1_source_data_1.xlsx]

## Sheet: Sheet1
	siRNA	average p24/FFL	SEM
	N.S.	1	0
	CCNT1	0.427612	0.0777874
	CDK9	0.28	0.0519615
	ZFP91 SI1	0.35202	0.161167
	ZFP91 SI2	0.257837	0.0904454
	ZFP91 SI3	0.299877	0.0834936
	UBE2O SI1	0.26803	0.0737791
	UBE2O SI2	0.405805	0.0551099
	UBE2O SI3	0.435203	0.127109
