# Supplementary material for: The HIV-1 Tat protein recruits a ubiquitin ligase to reorganize the 7SK snRNP for transcriptional activation
Source: eLife journal article supplement (doi:10.7554/elife.31879), 2018-05-30
Supplement: supp [file elife-31879-supp-v1.zip › elife_poa_e31879_Figure_1_source_data_2.xlsx]

## Sheet: Sheet1
siRNA	proximal avg.	SEM	distal avg.	SEM
N.S.	1	0	1	0
CDK9	0.633057	0.0715712	0.483831	0.0642446
UBE2O	0.859314	0.358115	0.36383	0.101592
ZFP91	0.788379	0.216647	0.625319	0.119854
