# Supplementary material for: The HIV-1 Tat protein recruits a ubiquitin ligase to reorganize the 7SK snRNP for transcriptional activation
Source: eLife journal article supplement (doi:10.7554/elife.31879), 2018-05-30
Supplement: supp [file elife-31879-supp-v1.zip › elife_poa_e31879_Figure_3_figure_supplement_1.pdf]

**A****MEPCE AP-MS**

|        | Replicate 1 | Replicate 2 |                  |
|--------|-------------|-------------|------------------|
| ZFP91  | 0           | 0           |                  |
| UBE2O  | 4           | 9           |                  |
| LARP7  | 58          | 60          |                  |
| MEPCE  | 41          | 53          | <b>7SK snRNP</b> |
| HEXIM1 | 4           | 5           |                  |
| CCNT1  | 2           | 14          | <b>P-TEFb</b>    |
| CDK9   | 4           | 12          |                  |
| AFF1   | 0           | 0           | <b>SEC</b>       |
| ENL    | 0           | 0           |                  |

**B****LARP7 AP-MS**

|        | Replicate 1 | Replicate 2 |                  |
|--------|-------------|-------------|------------------|
| ZFP91  | 0           | 0           |                  |
| UBE2O  | 0           | 0           |                  |
| LARP7  | 50          | 63          |                  |
| MEPCE  | 36          | 34          | <b>7SK snRNP</b> |
| HEXIM1 | 3           | 5           |                  |
| CCNT1  | 0           | 8           | <b>P-TEFb</b>    |
| CDK9   | 5           | 9           |                  |
| AFF1   | 0           | 0           | <b>SEC</b>       |
| ENL    | 0           | 0           |                  |

**Figure 3-figure supplement 1**
