# Supplementary material for: The HIV-1 Tat protein recruits a ubiquitin ligase to reorganize the 7SK snRNP for transcriptional activation
Source: eLife journal article supplement (doi:10.7554/elife.31879), 2018-05-30
Supplement: supp [file elife-31879-supp-v1.zip › elife_poa_e31879_Figure_7_source_data_1.xlsx]

## Sheet: Sheet1
fraction	fold enrichment avg.	SEM
cytoplasmic	21.7768	4.06272
nuclear	34.6385	13.6481
