# Supplementary material for: The HIV-1 Tat protein recruits a ubiquitin ligase to reorganize the 7SK snRNP for transcriptional activation
Source: eLife journal article supplement (doi:10.7554/elife.31879), 2018-05-30
Supplement: supp [file elife-31879-supp-v1.zip › elife_poa_e31879_Figure_7_source_data_2.xlsx]

## Sheet: Sheet1
	Replicate 1	Replicate 2	Average	SEM
	HIV Promoter	HIV Promoter	HIV Promoter	HIV Promoter
	CDK9 % Input	CDK9 % Input	CDK9 % Input	CDK9
N.S. -TAT	0.078	0.079	0.0785	0.000353553
N.S. +TAT	0.171	0.29	0.2305	0.0420729
siUBE2O -TAT	0.01	0	0.005	0.00353553
siUBE2O +TAT	0	0.069	0.0345	0.0243952
