# Supplementary material for: The HIV-1 Tat protein recruits a ubiquitin ligase to reorganize the 7SK snRNP for transcriptional activation
Source: eLife journal article supplement (doi:10.7554/elife.31879), 2018-05-30
Supplement: supp [file elife-31879-supp-v1.zip › elife_poa_e31879_Supplementary_File_1.xlsx]

## Sheet: HEXIM1 #1
Bait	Rank	Uniq Pep	Acc #	Num Unique	Peptide Count	% Cov	Best Disc Score	Best Expect Val	Protein MW	Species	Protein Name
Hexim1	[1]		P11142	33	56	50.3	5.98	1.3e-09	70898.7	HOMO SAPIENS	HSP7C_HUMAN Heat shock cognate 71 kDa protein
Hexim1	[1-1]	25	P08107	28	55	52.1	5.41	4.2e-09	70052.8	HOMO SAPIENS	HSP71_HUMAN Heat shock 70 kDa protein 1A/1B
Hexim1	[1-2]	10	P34931	14	27	24.3	5.35	4.2e-09	70375.6	HOMO SAPIENS	HS71L_HUMAN Heat shock 70 kDa protein 1-like
Hexim1	[1-3]	10	P11021	12	15	26.3	5.1	5.8e-09	72333.5	HOMO SAPIENS	GRP78_HUMAN 78 kDa glucose-regulated protein
Hexim1	[1-4]	3	P17066	7	17	13.1	5.02	3.1e-08	71028.7	HOMO SAPIENS	HSP76_HUMAN Heat shock 70 kDa protein 6
Hexim1	[1-5]	0	P54652	8	16	14.7	4.64	1.4e-08	70021.5	HOMO SAPIENS	HSP72_HUMAN Heat shock-related 70 kDa protein 2
Hexim1	[1-6]	2	P48741	4	11	13.6	4.47	3.1e-08	40244.8	HOMO SAPIENS	HSP77_HUMAN Putative heat shock 70 kDa protein 7
Hexim1	[2]		P38646	29	49	49	6.09	9.5e-10	73681.1	HOMO SAPIENS	GRP75_HUMAN Stress-70 protein, mitochondrial
Hexim1	[3]		O94992	28	167	72.7	6.24	1.7e-10	40623.8	HOMO SAPIENS	HEXI1_HUMAN Protein HEXIM1
Hexim1	[3-1]	3	Q96MH2	4	13	16.1	2	0.00019	32418.8	HOMO SAPIENS	HEXI2_HUMAN Protein HEXIM2
Hexim1	[4]		P68400	23	51	57.3	5.69	2.2e-10	45144	HOMO SAPIENS	CSK21_HUMAN Casein kinase II subunit alpha
Hexim1	[4-1]	19	P19784	20	42	67.4	5.59	2.1e-09	41213.6	HOMO SAPIENS	CSK22_HUMAN Casein kinase II subunit alpha'
Hexim1	[5]		P23396	21	54	71.2	5.41	2.9e-09	26688.6	HOMO SAPIENS	RS3_HUMAN 40S ribosomal protein S3
Hexim1	[6]		P46777	21	45	40.4	4.73	6.8e-08	34362.9	HOMO SAPIENS	RL5_HUMAN 60S ribosomal protein L5
Hexim1	[7]		P07437	17	25	55.2	3.48	1.7e-06	49671.3	HOMO SAPIENS	TBB5_HUMAN Tubulin beta chain
Hexim1	[7-1]	2	P68371	13	17	41.8	3.4	2.8e-06	49831.5	HOMO SAPIENS	TBB4B_HUMAN Tubulin beta-4B chain
Hexim1	[7-2]	1	P04350	11	15	36.5	3.3	2.8e-06	49586.2	HOMO SAPIENS	TBB4A_HUMAN Tubulin beta-4A chain
Hexim1	[7-3]	1	Q13509	10	13	20.9	3.47	1.7e-06	50433.2	HOMO SAPIENS	TBB3_HUMAN Tubulin beta-3 chain
Hexim1	[7-4]	0	Q13885	10	13	29.2	3.48	1.7e-06	49907.4	HOMO SAPIENS	TBB2A_HUMAN Tubulin beta-2A chain
Hexim1	[7-5]	0	Q9BVA1	10	13	29.2	3.48	1.7e-06	49953.5	HOMO SAPIENS	TBB2B_HUMAN Tubulin beta-2B chain
Hexim1	[7-6]	0	A6NNZ2	3	3	11.5	3.3	2.8e-06	49573.1	HOMO SAPIENS	TBB8B_HUMAN Tubulin beta-8 chain B
Hexim1	[7-7]	0	Q3ZCM7	3	3	11.5	3.3	2.8e-06	49776.5	HOMO SAPIENS	TBB8_HUMAN Tubulin beta-8 chain
Hexim1	[7-8]	0	Q9BUF5	3	4	7.4	2.48	1.4e-05	49857.6	HOMO SAPIENS	TBB6_HUMAN Tubulin beta-6 chain
Hexim1	[7-9]	0	A6NKZ8	1	1	2.7	1.82	0.00026	41775.5	HOMO SAPIENS	YI016_HUMAN Putative tubulin beta chain-like protein ENSP00000290377
Hexim1	[7-10]	0	Q9H4B7	1	1	2.2	1.82	0.00026	50327.4	HOMO SAPIENS	TBB1_HUMAN Tubulin beta-1 chain
Hexim1	[8]		Q9C0C9	18	20	22.4	3.78	2.6e-07	141295	HOMO SAPIENS	UBE2O_HUMAN Ubiquitin-conjugating enzyme E2 O
Hexim1	[9]		P67809	9	13	59	5.47	4.7e-07	35924.5	HOMO SAPIENS	YBOX1_HUMAN Nuclease-sensitive element-binding protein 1
Hexim1	[9-1]	2	P16989	3	3	23.7	3.61	1.1e-06	40090.2	HOMO SAPIENS	DBPA_HUMAN DNA-binding protein A
Hexim1	[9-2]	0	Q9Y2T7	1	1	4.7	3.61	1.1e-06	38518.3	HOMO SAPIENS	YBOX2_HUMAN Y-box-binding protein 2
Hexim1	[10]		P50750	13	16	35.8	4.93	1.6e-08	42777.9	HOMO SAPIENS	CDK9_HUMAN Cyclin-dependent kinase 9
Hexim1	[10-1]	0	O94921	1	2	1.7	1	0.0085	53057.3	HOMO SAPIENS	CDK14_HUMAN Cyclin-dependent kinase 14
Hexim1	[10-2]	0	P06239	1	2	1.6	1	0.0085	58001.1	HOMO SAPIENS	LCK_HUMAN Tyrosine-protein kinase Lck
Hexim1	[10-3]	0	P06241	1	2	1.5	1	0.0085	60762.4	HOMO SAPIENS	FYN_HUMAN Tyrosine-protein kinase Fyn
Hexim1	[10-4]	0	P06493	1	2	2.7	1	0.0085	34095.7	HOMO SAPIENS	CDK1_HUMAN Cyclin-dependent kinase 1
Hexim1	[10-5]	0	P07947	1	2	1.5	1	0.0085	60801.8	HOMO SAPIENS	YES_HUMAN Tyrosine-protein kinase Yes
Hexim1	[10-6]	0	P07948	1	2	1.6	1	0.0085	58574.6	HOMO SAPIENS	LYN_HUMAN Tyrosine-protein kinase Lyn
Hexim1	[10-7]	0	P08631	1	2	1.5	1	0.0085	59600.4	HOMO SAPIENS	HCK_HUMAN Tyrosine-protein kinase HCK
Hexim1	[10-8]	0	P09769	1	2	1.5	1	0.0085	59479.2	HOMO SAPIENS	FGR_HUMAN Tyrosine-protein kinase Fgr
Hexim1	[10-9]	0	P11362	1	2	1	1	0.0085	91868.6	HOMO SAPIENS	FGFR1_HUMAN Fibroblast growth factor receptor 1
Hexim1	[10-10]	0	P11802	1	2	2.6	1	0.0085	33730.1	HOMO SAPIENS	CDK4_HUMAN Cyclin-dependent kinase 4
Hexim1	[10-11]	0	P20794	1	2	1.3	1	0.0085	70581.4	HOMO SAPIENS	MAK_HUMAN Serine/threonine-protein kinase MAK
Hexim1	[10-12]	0	P21802	1	2	1	1	0.0085	92025.9	HOMO SAPIENS	FGFR2_HUMAN Fibroblast growth factor receptor 2
Hexim1	[10-13]	0	P22455	1	2	1	1	0.0085	87955.2	HOMO SAPIENS	FGFR4_HUMAN Fibroblast growth factor receptor 4
Hexim1	[10-14]	0	P22607	1	2	1	1	0.0085	87710.4	HOMO SAPIENS	FGFR3_HUMAN Fibroblast growth factor receptor 3
Hexim1	[10-15]	0	P24941	1	2	2.7	1	0.0085	33929.8	HOMO SAPIENS	CDK2_HUMAN Cyclin-dependent kinase 2
Hexim1	[10-16]	0	P51451	1	2	1.6	1	0.0085	57707	HOMO SAPIENS	BLK_HUMAN Tyrosine-protein kinase Blk
Hexim1	[10-17]	0	Q00526	1	2	2.6	1	0.0085	35046	HOMO SAPIENS	CDK3_HUMAN Cyclin-dependent kinase 3
Hexim1	[10-18]	0	Q00534	1	2	2.5	1	0.0085	36938.7	HOMO SAPIENS	CDK6_HUMAN Cyclin-dependent kinase 6
Hexim1	[10-19]	0	Q00535	1	2	2.7	1	0.0085	33304.8	HOMO SAPIENS	CDK5_HUMAN Cyclin-dependent kinase 5
Hexim1	[10-20]	0	Q00536	1	2	1.6	1	0.0085	55716.2	HOMO SAPIENS	CDK16_HUMAN Cyclin-dependent kinase 16
Hexim1	[10-21]	0	Q00537	1	2	1.5	1	0.0085	59582.7	HOMO SAPIENS	CDK17_HUMAN Cyclin-dependent kinase 17
Hexim1	[10-22]	0	Q07002	1	2	1.7	1	0.0085	54180.5	HOMO SAPIENS	CDK18_HUMAN Cyclin-dependent kinase 18
Hexim1	[10-23]	0	Q14004	1	2	0.5	1	0.0085	164924	HOMO SAPIENS	CDK13_HUMAN Cyclin-dependent kinase 13
Hexim1	[10-24]	0	Q8IZL9	1	2	2.3	1	0.0085	38695.1	HOMO SAPIENS	CDK20_HUMAN Cyclin-dependent kinase 20
Hexim1	[10-25]	0	Q96Q40	1	2	1.8	1	0.0085	49023.5	HOMO SAPIENS	CDK15_HUMAN Cyclin-dependent kinase 15
Hexim1	[10-26]	0	Q9NYV4	1	2	0.5	1	0.0085	164156	HOMO SAPIENS	CDK12_HUMAN Cyclin-dependent kinase 12
Hexim1	[10-27]	0	Q9UPZ9	1	2	1.3	1	0.0085	71427.4	HOMO SAPIENS	ICK_HUMAN Serine/threonine-protein kinase ICK
Hexim1	[11]		P67870	13	33	49.3	4.83	1.2e-08	24942.7	HOMO SAPIENS	CSK2B_HUMAN Casein kinase II subunit beta
Hexim1	[12]		O60563	13	14	24.5	4.61	4.3e-08	80685.3	HOMO SAPIENS	CCNT1_HUMAN Cyclin-T1
Hexim1	[13]		Q07021	9	39	42.9	5.26	7.2e-09	31362.5	HOMO SAPIENS	C1QBP_HUMAN Complement component 1 Q subcomponent-binding protein, mitochondrial
Hexim1	[14]		P62701	13	18	49.4	3.71	3.9e-06	29598	HOMO SAPIENS	RS4X_HUMAN 40S ribosomal protein S4, X isoform
Hexim1	[14-1]	0	P22090	4	6	12.2	2.58	9e-06	29455.9	HOMO SAPIENS	RS4Y1_HUMAN 40S ribosomal protein S4, Y isoform 1
Hexim1	[14-2]	0	Q8TD47	4	6	13.7	2.58	9e-06	29295.7	HOMO SAPIENS	RS4Y2_HUMAN 40S ribosomal protein S4, Y isoform 2
Hexim1	[15]		Q00839	10	12	17.5	4.6	1.9e-07	90585.2	HOMO SAPIENS	HNRPU_HUMAN Heterogeneous nuclear ribonucleoprotein U
Hexim1	[16]		P68363	10	14	40.4	4.1	6.5e-07	50152.1	HOMO SAPIENS	TBA1B_HUMAN Tubulin alpha-1B chain
Hexim1	[16-1]	1	Q71U36	10	14	40.4	3.97	1.5e-06	50136.1	HOMO SAPIENS	TBA1A_HUMAN Tubulin alpha-1A chain
Hexim1	[16-2]	1	Q9BQE3	7	10	24.9	3.97	1.5e-06	49895.8	HOMO SAPIENS	TBA1C_HUMAN Tubulin alpha-1C chain
Hexim1	[16-3]	0	P68366	7	9	26.3	3.82	6.5e-07	49924.9	HOMO SAPIENS	TBA4A_HUMAN Tubulin alpha-4A chain
Hexim1	[16-4]	1	Q13748	7	10	28.7	3.69	1.5e-06	49960	HOMO SAPIENS	TBA3C_HUMAN Tubulin alpha-3C/D chain
Hexim1	[16-5]	1	Q6PEY2	7	10	28.7	3.69	1.5e-06	49859	HOMO SAPIENS	TBA3E_HUMAN Tubulin alpha-3E chain
Hexim1	[16-6]	1	Q9NY65	4	4	15.4	2.31	2.2e-05	50094	HOMO SAPIENS	TBA8_HUMAN Tubulin alpha-8 chain
Hexim1	[16-7]	0	A6NHL2	1	1	2	1.53	0.00011	49909.2	HOMO SAPIENS	TBAL3_HUMAN Tubulin alpha chain-like 3
Hexim1	[17]		O00411	13	16	16.1	2.85	4.1e-05	138622	HOMO SAPIENS	RPOM_HUMAN DNA-directed RNA polymerase, mitochondrial
Hexim1	[18]		P25398	9	13	57.6	5.43	1.2e-09	14515.1	HOMO SAPIENS	RS12_HUMAN 40S ribosomal protein S12
Hexim1	[19]		P46782	8	11	46.1	4.38	2.5e-07	22876.6	HOMO SAPIENS	RS5_HUMAN 40S ribosomal protein S5
Hexim1	[20]		Q08211	10	11	10.5	3.42	4.6e-06	140960	HOMO SAPIENS	DHX9_HUMAN ATP-dependent RNA helicase A
Hexim1	[21]		P62829	7	11	40.7	5.46	1.1e-09	14865.6	HOMO SAPIENS	RL23_HUMAN 60S ribosomal protein L23
Hexim1	[22]		P62249	11	16	58.2	3.27	9.9e-07	16445.5	HOMO SAPIENS	RS16_HUMAN 40S ribosomal protein S16
Hexim1	[23]		P35908	8	8	17.2	4.18	1.2e-07	65433.4	HOMO SAPIENS	K22E_HUMAN Keratin, type II cytoskeletal 2 epidermal
Hexim1	[23-1]	6	P04264	7	7	13	3.42	1.2e-05	66039.2	HOMO SAPIENS	K2C1_HUMAN Keratin, type II cytoskeletal 1
Hexim1	[23-2]	1	P04259	3	3	5.5	2.95	0.0002	60067.4	HOMO SAPIENS	K2C6B_HUMAN Keratin, type II cytoskeletal 6B
Hexim1	[23-3]	0	P02538	2	2	3.7	2.95	0.0002	60045.4	HOMO SAPIENS	K2C6A_HUMAN Keratin, type II cytoskeletal 6A
Hexim1	[23-4]	0	P48668	2	2	3.7	2.95	0.0002	60025.4	HOMO SAPIENS	K2C6C_HUMAN Keratin, type II cytoskeletal 6C
Hexim1	[23-5]	1	P13647	2	2	3.6	2.95	0.0002	62378.9	HOMO SAPIENS	K2C5_HUMAN Keratin, type II cytoskeletal 5
Hexim1	[23-6]	0	Q7Z794	1	1	2.1	3.42	1.2e-05	61901.9	HOMO SAPIENS	K2C1B_HUMAN Keratin, type II cytoskeletal 1b
Hexim1	[23-7]	0	O95678	1	1	2.2	2.95	0.0002	59560.9	HOMO SAPIENS	K2C75_HUMAN Keratin, type II cytoskeletal 75
Hexim1	[23-8]	0	Q5XKE5	1	1	2.2	2.95	0.0002	57836.1	HOMO SAPIENS	K2C79_HUMAN Keratin, type II cytoskeletal 79
Hexim1	[23-9]	0	P19013	1	1	1.7	1.5	0.0015	57285.7	HOMO SAPIENS	K2C4_HUMAN Keratin, type II cytoskeletal 4
Hexim1	[23-10]	0	Q01546	1	1	1.4	1.5	0.0015	65841.3	HOMO SAPIENS	K22O_HUMAN Keratin, type II cytoskeletal 2 oral
Hexim1	[24]		Q99733	7	7	27.5	4.91	2.5e-08	42823.8	HOMO SAPIENS	NP1L4_HUMAN Nucleosome assembly protein 1-like 4
Hexim1	[25]		P10809	9	11	27.4	3.76	1.4e-07	61055.2	HOMO SAPIENS	CH60_HUMAN 60 kDa heat shock protein, mitochondrial
Hexim1	[26]		P25705	7	8	16.6	4.42	1.4e-08	59751.1	HOMO SAPIENS	ATPA_HUMAN ATP synthase subunit alpha, mitochondrial
Hexim1	[27]		Q93008	10	10	5.5	2.84	1.3e-05	292282	HOMO SAPIENS	USP9X_HUMAN Probable ubiquitin carboxyl-terminal hydrolase FAF-X
Hexim1	[27-1]	0	O00507	3	3	1.1	0.9	0.0018	291080	HOMO SAPIENS	USP9Y_HUMAN Probable ubiquitin carboxyl-terminal hydrolase FAF-Y
Hexim1	[28]		P61247	9	15	34.8	3.37	4.3e-06	29945.2	HOMO SAPIENS	RS3A_HUMAN 40S ribosomal protein S3a
Hexim1	[29]		Q10567	7	9	11	3.64	1.6e-06	104638	HOMO SAPIENS	AP1B1_HUMAN AP-1 complex subunit beta-1
Hexim1	[29-1]	0	P63010	1	2	1.4	3.44	1.6e-06	104554	HOMO SAPIENS	AP2B1_HUMAN AP-2 complex subunit beta
Hexim1	[30]		P15880	8	11	30.4	3.44	2.5e-06	31324.7	HOMO SAPIENS	RS2_HUMAN 40S ribosomal protein S2
Hexim1	[31]		P35637	6	10	19.2	3.95	1.5e-05	53426.2	HOMO SAPIENS	FUS_HUMAN RNA-binding protein FUS
Hexim1	[31-1]	0	Q92804	1	1	2.4	2.84	1.5e-05	61830.4	HOMO SAPIENS	RBP56_HUMAN TATA-binding protein-associated factor 2N
Hexim1	[32]		P19338	9	11	14.9	2.67	2.2e-05	76615	HOMO SAPIENS	NUCL_HUMAN Nucleolin
Hexim1	[33]		P50990	6	6	11.7	4.4	2.6e-07	59621.1	HOMO SAPIENS	TCPQ_HUMAN T-complex protein 1 subunit theta
Hexim1	[34]		P78371	8	8	25.4	2.93	3.1e-05	57488.7	HOMO SAPIENS	TCPB_HUMAN T-complex protein 1 subunit beta
Hexim1	[35]		P34932	7	7	14.6	3.8	9e-07	94331.8	HOMO SAPIENS	HSP74_HUMAN Heat shock 70 kDa protein 4
Hexim1	[35-1]	4	Q92598	5	6	10.6	2.49	3.4e-05	96865.8	HOMO SAPIENS	HS105_HUMAN Heat shock protein 105 kDa
Hexim1	[35-2]	1	O95757	2	2	3.3	2.49	3.4e-05	94513.3	HOMO SAPIENS	HS74L_HUMAN Heat shock 70 kDa protein 4L
Hexim1	[36]		Q9BUJ2	7	7	14	4.14	2.4e-07	95739.3	HOMO SAPIENS	HNRL1_HUMAN Heterogeneous nuclear ribonucleoprotein U-like protein 1
Hexim1	[37]		P39019	10	13	50.3	2.58	2.6e-05	16060.6	HOMO SAPIENS	RS19_HUMAN 40S ribosomal protein S19
Hexim1	[38]		P63261	6	7	19.2	4.8	9.2e-09	41793.2	HOMO SAPIENS	ACTG_HUMAN Actin, cytoplasmic 2
Hexim1	[38-1]	1	P60709	6	7	19.2	1.36	0.0011	41737.1	HOMO SAPIENS	ACTB_HUMAN Actin, cytoplasmic 1
Hexim1	[38-2]	0	P62736	4	5	11.7	1.36	0.0011	42009.4	HOMO SAPIENS	ACTA_HUMAN Actin, aortic smooth muscle
Hexim1	[38-3]	0	P63267	4	5	11.7	1.36	0.0011	41877.3	HOMO SAPIENS	ACTH_HUMAN Actin, gamma-enteric smooth muscle
Hexim1	[38-4]	0	P68032	4	5	11.7	1.36	0.0011	42019.4	HOMO SAPIENS	ACTC_HUMAN Actin, alpha cardiac muscle 1
Hexim1	[38-5]	0	P68133	4	5	11.7	1.36	0.0011	42051.4	HOMO SAPIENS	ACTS_HUMAN Actin, alpha skeletal muscle
Hexim1	[38-6]	0	A5A3E0	1	1	0.9	1.3	0.0015	121446	HOMO SAPIENS	POTEF_HUMAN POTE ankyrin domain family member F
Hexim1	[38-7]	0	P0CG38	1	1	0.9	1.3	0.0015	121284	HOMO SAPIENS	POTEI_HUMAN POTE ankyrin domain family member I
Hexim1	[38-8]	0	P0CG39	1	1	1	1.3	0.0015	117391	HOMO SAPIENS	POTEJ_HUMAN POTE ankyrin domain family member J
Hexim1	[38-9]	0	Q6S8J3	1	1	0.9	1.3	0.0015	121365	HOMO SAPIENS	POTEE_HUMAN POTE ankyrin domain family member E
Hexim1	[38-10]	0	Q562R1	1	2	2.9	0.82	0.0036	42003.6	HOMO SAPIENS	ACTBL_HUMAN Beta-actin-like protein 2
Hexim1	[39]		P78347	8	9	13.6	3.42	5.6e-07	112417	HOMO SAPIENS	GTF2I_HUMAN General transcription factor II-I
Hexim1	[40]		P62269	7	17	32.9	3.57	6.9e-07	17718.8	HOMO SAPIENS	RS18_HUMAN 40S ribosomal protein S18
Hexim1	[41]		Q9HD40	7	8	23	3.01	5.1e-05	55726.8	HOMO SAPIENS	SPCS_HUMAN O-phosphoseryl-tRNA(Sec) selenium transferase
Hexim1	[42]		Q7L2E3	8	8	8.8	2.82	1.1e-05	133939	HOMO SAPIENS	DHX30_HUMAN Putative ATP-dependent RNA helicase DHX30
Hexim1	[43]		P46783	5	5	33.3	4.3	6.2e-07	18897.9	HOMO SAPIENS	RS10_HUMAN 40S ribosomal protein S10
Hexim1	[43-1]	0	Q9NQ39	3	3	17.6	4.3	6.2e-07	20120.5	HOMO SAPIENS	RS10L_HUMAN Putative 40S ribosomal protein S10-like
Hexim1	[44]		Q4G0J3	6	6	13.6	3.76	5.6e-07	66899.2	HOMO SAPIENS	LARP7_HUMAN La-related protein 7
Hexim1	[45]		P68104	6	11	17.5	3.58	1.1e-06	50141.3	HOMO SAPIENS	EF1A1_HUMAN Elongation factor 1-alpha 1
Hexim1	[45-1]	-1	Q5VTE0	6	11	17.5	3.58	1.1e-06	50185.5	HOMO SAPIENS	EF1A3_HUMAN Putative elongation factor 1-alpha-like 3
Hexim1	[45-2]	0	Q05639	3	5	6.3	2.19	0.00022	50470.6	HOMO SAPIENS	EF1A2_HUMAN Elongation factor 1-alpha 2
Hexim1	[46]		P62913	4	7	20.2	4.49	9.8e-08	20252.6	HOMO SAPIENS	RL11_HUMAN 60S ribosomal protein L11
Hexim1	[47]		P62263	5	6	31.1	3.68	7.4e-07	16272.9	HOMO SAPIENS	RS14_HUMAN 40S ribosomal protein S14
Hexim1	[48]		P48643	5	5	16.3	3.82	3.2e-07	59671.6	HOMO SAPIENS	TCPE_HUMAN T-complex protein 1 subunit epsilon
Hexim1	[49]		P06576	5	5	13.6	3.53	4.9e-07	56560.4	HOMO SAPIENS	ATPB_HUMAN ATP synthase subunit beta, mitochondrial
Hexim1	[50]		P37108	4	4	34.6	4.51	4.3e-07	14570.1	HOMO SAPIENS	SRP14_HUMAN Signal recognition particle 14 kDa protein
Hexim1	[51]		P06748	5	8	18.4	3.93	5.3e-08	32575.3	HOMO SAPIENS	NPM_HUMAN Nucleophosmin
Hexim1	[52]		P35232	6	6	25.4	3.15	1.3e-06	29804.3	HOMO SAPIENS	PHB_HUMAN Prohibitin
Hexim1	[53]		O43390	6	7	14.2	2.62	0.00012	70943.6	HOMO SAPIENS	HNRPR_HUMAN Heterogeneous nuclear ribonucleoprotein R
Hexim1	[53-1]	0	O60506	1	2	1.9	1.24	0.00069	69603.2	HOMO SAPIENS	HNRPQ_HUMAN Heterogeneous nuclear ribonucleoprotein Q
Hexim1	[54]		P08708	4	5	43	4.19	1e-07	15550.3	HOMO SAPIENS	RS17_HUMAN 40S ribosomal protein S17
Hexim1	[54-1]	0	P0CW22	4	5	43	4.19	1e-07	15550.3	HOMO SAPIENS	RS17L_HUMAN 40S ribosomal protein S17-like
Hexim1	[55]		P26641	4	5	14.6	4.03	6.4e-07	50119.2	HOMO SAPIENS	EF1G_HUMAN Elongation factor 1-gamma
Hexim1	[56]		P62241	5	6	29.8	3.29	6.3e-06	24205.4	HOMO SAPIENS	RS8_HUMAN 40S ribosomal protein S8
Hexim1	[57]		Q96EY7	6	6	14.5	2.74	1.8e-05	78550.4	HOMO SAPIENS	PTCD3_HUMAN Pentatricopeptide repeat-containing protein 3, mitochondrial
Hexim1	[58]		P17987	4	5	9.9	3.86	1.5e-06	60344.1	HOMO SAPIENS	TCPA_HUMAN T-complex protein 1 subunit alpha
Hexim1	[59]		P29692	4	4	21.4	3.36	1.9e-06	31122.1	HOMO SAPIENS	EF1D_HUMAN Elongation factor 1-delta
Hexim1	[60]		P62851	5	7	29.6	2.66	0.00011	13742.2	HOMO SAPIENS	RS25_HUMAN 40S ribosomal protein S25
Hexim1	[61]		P30050	4	4	35.8	3.57	1.7e-06	17818.7	HOMO SAPIENS	RL12_HUMAN 60S ribosomal protein L12
Hexim1	[62]		Q8NC51	3	3	10.5	5.15	6.4e-09	44965.7	HOMO SAPIENS	PAIRB_HUMAN Plasminogen activator inhibitor 1 RNA-binding protein
Hexim1	[63]		P40227	5	5	13.7	2.87	6.9e-06	58024.7	HOMO SAPIENS	TCPZ_HUMAN T-complex protein 1 subunit zeta
Hexim1	[63-1]	1	Q92526	2	2	4.2	1.35	0.00064	57822	HOMO SAPIENS	TCPW_HUMAN T-complex protein 1 subunit zeta-2
Hexim1	[64]		P62857	4	7	52.2	3.27	1.1e-05	7841.1	HOMO SAPIENS	RS28_HUMAN 40S ribosomal protein S28
Hexim1	[65]		P83731	3	3	13.4	4.19	3.4e-06	17779.1	HOMO SAPIENS	RL24_HUMAN 60S ribosomal protein L24
Hexim1	[66]		Q14011	4	5	38.4	3.44	6.9e-07	18648.1	HOMO SAPIENS	CIRBP_HUMAN Cold-inducible RNA-binding protein
Hexim1	[67]		P21333	6	6	4.6	2.55	4.3e-06	280741	HOMO SAPIENS	FLNA_HUMAN Filamin-A
Hexim1	[68]		P27635	5	6	23.4	2.32	0.00013	24604.1	HOMO SAPIENS	RL10_HUMAN 60S ribosomal protein L10
Hexim1	[68-1]	0	Q96L21	1	1	4.2	1.21	0.0011	24519	HOMO SAPIENS	RL10L_HUMAN 60S ribosomal protein L10-like
Hexim1	[69]		P50991	6	6	17.1	2.41	1.7e-05	57924.8	HOMO SAPIENS	TCPD_HUMAN T-complex protein 1 subunit delta
Hexim1	[70]		Q99832	4	4	8.7	3.15	2.1e-06	59367.2	HOMO SAPIENS	TCPH_HUMAN T-complex protein 1 subunit eta
Hexim1	[71]		Q9Y6H1	3	4	33.8	4.03	6.5e-07	15512.7	HOMO SAPIENS	CHCH2_HUMAN Coiled-coil-helix-coiled-coil-helix domain-containing protein 2, mitochondrial
Hexim1	[71-1]	0	Q5T1J5	2	3	27.2	4.03	6.5e-07	15489.7	HOMO SAPIENS	CHCH9_HUMAN Putative coiled-coil-helix-coiled-coil-helix domain-containing protein CHCHD2P9, mitochondrial
Hexim1	[72]		P82933	4	4	16.4	3.22	1.4e-05	45835.2	HOMO SAPIENS	RT09_HUMAN 28S ribosomal protein S9, mitochondrial
Hexim1	[73]		Q15014	4	5	17.4	3.18	6.4e-07	32308.1	HOMO SAPIENS	MO4L2_HUMAN Mortality factor 4-like protein 2
Hexim1	[74]		P62277	4	4	29.1	3.28	2.3e-06	17222.4	HOMO SAPIENS	RS13_HUMAN 40S ribosomal protein S13
Hexim1	[75]		P23528	4	5	31.3	3.22	1.1e-06	18502.7	HOMO SAPIENS	COF1_HUMAN Cofilin-1
Hexim1	[75-1]	0	Q9Y281	1	1	6.6	2.85	1.1e-06	18736.8	HOMO SAPIENS	COF2_HUMAN Cofilin-2
Hexim1	[76]		P13645	7	7	15.4	1.8	5.4e-05	58827.5	HOMO SAPIENS	K1C10_HUMAN Keratin, type I cytoskeletal 10
Hexim1	[76-1]	0	Q7Z3Y7	2	2	3.9	1.45	0.00025	50567.8	HOMO SAPIENS	K1C28_HUMAN Keratin, type I cytoskeletal 28
Hexim1	[76-2]	0	Q7Z3Y8	2	2	3.9	1.45	0.00025	49822.8	HOMO SAPIENS	K1C27_HUMAN Keratin, type I cytoskeletal 27
Hexim1	[76-3]	0	Q7Z3Z0	2	2	4	1.45	0.00025	49318.3	HOMO SAPIENS	K1C25_HUMAN Keratin, type I cytoskeletal 25
Hexim1	[76-4]	0	P02533	1	1	1.9	0.88	0.0019	51561.9	HOMO SAPIENS	K1C14_HUMAN Keratin, type I cytoskeletal 14
Hexim1	[76-5]	0	P08779	1	1	1.9	0.88	0.0019	51268.3	HOMO SAPIENS	K1C16_HUMAN Keratin, type I cytoskeletal 16
Hexim1	[76-6]	0	Q7Z3Y9	1	1	1.9	0.88	0.0019	51911.1	HOMO SAPIENS	K1C26_HUMAN Keratin, type I cytoskeletal 26
Hexim1	[77]		Q9NZI8	3	3	8.1	3.5	6.2e-06	63481.1	HOMO SAPIENS	IF2B1_HUMAN Insulin-like growth factor 2 mRNA-binding protein 1
Hexim1	[78]		P08865	3	3	13.9	3.68	1.8e-06	32854.4	HOMO SAPIENS	RSSA_HUMAN 40S ribosomal protein SA
Hexim1	[79]		P46781	5	6	26.3	2.52	8.8e-06	22591.6	HOMO SAPIENS	RS9_HUMAN 40S ribosomal protein S9
Hexim1	[80]		P62847	4	4	29.3	2.61	4.2e-06	15423.3	HOMO SAPIENS	RS24_HUMAN 40S ribosomal protein S24
Hexim1	[81]		P55209	2	3	12.5	5.44	7.6e-09	45374.5	HOMO SAPIENS	NP1L1_HUMAN Nucleosome assembly protein 1-like 1
Hexim1	[82]		Q9Y676	3	3	15.1	3.23	2e-06	29395.8	HOMO SAPIENS	RT18B_HUMAN 28S ribosomal protein S18b, mitochondrial
Hexim1	[83]		Q15365	4	4	17.1	2.45	1.9e-05	37498.2	HOMO SAPIENS	PCBP1_HUMAN Poly(rC)-binding protein 1
Hexim1	[83-1]	1	Q15366	2	2	6	2.34	3.7e-05	38580.4	HOMO SAPIENS	PCBP2_HUMAN Poly(rC)-binding protein 2
Hexim1	[83-2]	0	P57721	1	1	3	2.34	3.7e-05	39465.6	HOMO SAPIENS	PCBP3_HUMAN Poly(rC)-binding protein 3
Hexim1	[84]		Q13263	3	3	9.5	3.29	5.7e-06	88550.5	HOMO SAPIENS	TIF1B_HUMAN Transcription intermediary factor 1-beta
Hexim1	[85]		P62750	3	3	20.5	3.51	1.2e-06	17695.2	HOMO SAPIENS	RL23A_HUMAN 60S ribosomal protein L23a
Hexim1	[86]		P49368	5	5	10.8	1.98	5.4e-05	60534.5	HOMO SAPIENS	TCPG_HUMAN T-complex protein 1 subunit gamma
Hexim1	[87]		P55884	3	3	8.6	2.78	1.7e-05	92482.4	HOMO SAPIENS	EIF3B_HUMAN Eukaryotic translation initiation factor 3 subunit B
Hexim1	[88]		P62753	5	7	25.3	1.84	0.00017	28680.9	HOMO SAPIENS	RS6_HUMAN 40S ribosomal protein S6
Hexim1	[89]		Q9NR30	3	3	4.7	2.83	4.1e-06	87345.1	HOMO SAPIENS	DDX21_HUMAN Nucleolar RNA helicase 2
Hexim1	[89-1]	0	Q9BQ39	1	1	2	2.83	4.1e-06	82565.7	HOMO SAPIENS	DDX50_HUMAN ATP-dependent RNA helicase DDX50
Hexim1	[90]		Q99623	3	3	12.7	2.91	1.2e-05	33296.7	HOMO SAPIENS	PHB2_HUMAN Prohibitin-2
Hexim1	[91]		P82650	3	3	11.1	2.62	3.3e-05	41280.7	HOMO SAPIENS	RT22_HUMAN 28S ribosomal protein S22, mitochondrial
Hexim1	[92]		O43865	3	3	9.8	2.61	1.8e-05	58952	HOMO SAPIENS	SAHH2_HUMAN Putative adenosylhomocysteinase 2
Hexim1	[92-1]	0	Q96HN2	1	1	2.3	2.26	1.8e-05	66721.8	HOMO SAPIENS	SAHH3_HUMAN Putative adenosylhomocysteinase 3
Hexim1	[93]		P62899	3	4	26.4	2.94	2.8e-06	14463	HOMO SAPIENS	RL31_HUMAN 60S ribosomal protein L31
Hexim1	[94]		P62841	2	3	22.1	4.01	3.2e-08	17040.3	HOMO SAPIENS	RS15_HUMAN 40S ribosomal protein S15
Hexim1	[95]		P23246	3	3	8.6	2.87	3.2e-06	76150	HOMO SAPIENS	SFPQ_HUMAN Splicing factor, proline- and glutamine-rich
Hexim1	[96]		P52815	2	2	11.1	3.2	1.2e-05	21348.4	HOMO SAPIENS	RM12_HUMAN 39S ribosomal protein L12, mitochondrial
Hexim1	[97]		Q6PD74	1	1	5.1	5.32	1e-08	34593.9	HOMO SAPIENS	AAGAB_HUMAN Alpha- and gamma-adaptin-binding protein p34
Hexim1	[98]		P35527	2	2	8.3	2.93	2.1e-06	62064.8	HOMO SAPIENS	K1C9_HUMAN Keratin, type I cytoskeletal 9
Hexim1	[99]		P60660	3	3	25.8	2.16	1.7e-05	16930.2	HOMO SAPIENS	MYL6_HUMAN Myosin light polypeptide 6
Hexim1	[99-1]	0	P14649	1	1	5.3	1.85	9.6e-05	22764.2	HOMO SAPIENS	MYL6B_HUMAN Myosin light chain 6B
Hexim1	[100]		Q86V81	3	3	25.3	1.83	0.001	26888.1	HOMO SAPIENS	THOC4_HUMAN THO complex subunit 4
Hexim1	[101]		Q15233	2	2	10	2.74	1.2e-05	54232	HOMO SAPIENS	NONO_HUMAN Non-POU domain-containing octamer-binding protein
Hexim1	[102]		P05455	2	2	5.1	2.56	2.6e-05	46837.4	HOMO SAPIENS	LA_HUMAN Lupus La protein
Hexim1	[103]		Q7L2J0	3	4	7.8	1.91	0.00031	74355.8	HOMO SAPIENS	MEPCE_HUMAN 7SK snRNA methylphosphate capping enzyme
Hexim1	[104]		P62280	4	4	22.2	1.8	8.2e-05	18430.9	HOMO SAPIENS	RS11_HUMAN 40S ribosomal protein S11
Hexim1	[105]		Q09028	1	1	3.5	4.67	2.7e-08	47656.1	HOMO SAPIENS	RBBP4_HUMAN Histone-binding protein RBBP4
Hexim1	[106]		O14950	3	3	22.1	1.9	5.7e-05	19779.3	HOMO SAPIENS	ML12B_HUMAN Myosin regulatory light chain 12B
Hexim1	[106-1]	0	P19105	3	3	22.2	1.9	5.7e-05	19794.3	HOMO SAPIENS	ML12A_HUMAN Myosin regulatory light chain 12A
Hexim1	[106-2]	0	P24844	1	1	10.5	1.85	5.7e-05	19827.4	HOMO SAPIENS	MYL9_HUMAN Myosin regulatory light polypeptide 9
Hexim1	[107]		P46776	4	5	17.6	1.7	7.3e-05	16561.5	HOMO SAPIENS	RL27A_HUMAN 60S ribosomal protein L27a
Hexim1	[108]		P01614	1	1	11.3	4.4	1.7e-08	12676.4	HOMO SAPIENS	KV201_HUMAN Ig kappa chain V-II region Cum
Hexim1	[108-1]	0	P01617	1	1	11.5	4.4	1.7e-08	12317	HOMO SAPIENS	KV204_HUMAN Ig kappa chain V-II region TEW
Hexim1	[108-2]	0	P06309	1	1	11.1	4.4	1.7e-08	12664.3	HOMO SAPIENS	KV205_HUMAN Ig kappa chain V-II region GM607 (Fragment)
Hexim1	[108-3]	0	P06310	1	1	9.8	4.4	1.7e-08	14706.8	HOMO SAPIENS	KV206_HUMAN Ig kappa chain V-II region RPMI 6410
Hexim1	[109]		P61254	3	4	17.2	1.74	0.00055	17258.4	HOMO SAPIENS	RL26_HUMAN 60S ribosomal protein L26
Hexim1	[109-1]	0	Q9UNX3	2	3	11.7	1.74	0.00055	17256.4	HOMO SAPIENS	RL26L_HUMAN 60S ribosomal protein L26-like 1
Hexim1	[110]		P24534	1	1	6.7	4.3	2.8e-07	24763.9	HOMO SAPIENS	EF1B_HUMAN Elongation factor 1-beta
Hexim1	[111]		Q13547	2	2	6.4	2.45	7.3e-05	55103.5	HOMO SAPIENS	HDAC1_HUMAN Histone deacetylase 1
Hexim1	[111-1]	1	Q92769	2	2	6.4	1.07	0.0029	55364.7	HOMO SAPIENS	HDAC2_HUMAN Histone deacetylase 2
Hexim1	[112]		Q99613	2	2	2.8	2.44	1.7e-05	105345	HOMO SAPIENS	EIF3C_HUMAN Eukaryotic translation initiation factor 3 subunit C
Hexim1	[113]		P04908	2	3	21.5	2.58	4.3e-05	14135.6	HOMO SAPIENS	H2A1B_HUMAN Histone H2A type 1-B/E
Hexim1	[113-1]	0	P0C0S8	2	3	21.5	2.58	4.3e-05	14091.6	HOMO SAPIENS	H2A1_HUMAN Histone H2A type 1
Hexim1	[113-2]	0	P20671	2	3	21.5	2.58	4.3e-05	14107.6	HOMO SAPIENS	H2A1D_HUMAN Histone H2A type 1-D
Hexim1	[113-3]	0	Q16777	2	3	21.7	2.58	4.3e-05	13988.5	HOMO SAPIENS	H2A2C_HUMAN Histone H2A type 2-C
Hexim1	[113-4]	0	Q6FI13	2	3	21.5	2.58	4.3e-05	14095.6	HOMO SAPIENS	H2A2A_HUMAN Histone H2A type 2-A
Hexim1	[113-5]	0	Q7L7L0	2	3	21.5	2.58	4.3e-05	14121.6	HOMO SAPIENS	H2A3_HUMAN Histone H2A type 3
Hexim1	[113-6]	0	Q93077	2	3	21.5	2.58	4.3e-05	14105.6	HOMO SAPIENS	H2A1C_HUMAN Histone H2A type 1-C
Hexim1	[113-7]	0	Q96KK5	2	3	21.9	2.58	4.3e-05	13906.4	HOMO SAPIENS	H2A1H_HUMAN Histone H2A type 1-H
Hexim1	[113-8]	0	Q99878	2	3	21.9	2.58	4.3e-05	13936.4	HOMO SAPIENS	H2A1J_HUMAN Histone H2A type 1-J
Hexim1	[113-9]	0	Q9BTM1	2	3	21.7	2.58	4.3e-05	14019.5	HOMO SAPIENS	H2AJ_HUMAN Histone H2A.J
Hexim1	[114]		P42677	2	2	25	2.36	3.5e-05	9461.2	HOMO SAPIENS	RS27_HUMAN 40S ribosomal protein S27
Hexim1	[114-1]	0	Q71UM5	2	2	25	2.36	3.5e-05	9477.3	HOMO SAPIENS	RS27L_HUMAN 40S ribosomal protein S27-like
Hexim1	[115]		Q01844	2	2	3.7	2.68	1.2e-05	68478.8	HOMO SAPIENS	EWS_HUMAN RNA-binding protein EWS
Hexim1	[116]		P62937	3	3	31.5	1.65	0.00036	18012.7	HOMO SAPIENS	PPIA_HUMAN Peptidyl-prolyl cis-trans isomerase A
Hexim1	[116-1]	0	Q9Y536	1	1	8.5	0.02	0.0083	18182	HOMO SAPIENS	PAL4A_HUMAN Peptidyl-prolyl cis-trans isomerase A-like 4A/B/C
Hexim1	[117]		O60583	4	4	7.7	1.06	0.0032	81029.6	HOMO SAPIENS	CCNT2_HUMAN Cyclin-T2
Hexim1	[118]		Q13435	2	3	7.2	2.03	0.00067	100228	HOMO SAPIENS	SF3B2_HUMAN Splicing factor 3B subunit 2
Hexim1	[119]		P62191	2	2	7.5	1.99	8.2e-05	49184.9	HOMO SAPIENS	PRS4_HUMAN 26S protease regulatory subunit 4
Hexim1	[120]		P82673	3	3	20.1	1.66	0.00085	36844.6	HOMO SAPIENS	RT35_HUMAN 28S ribosomal protein S35, mitochondrial
Hexim1	[121]		Q00610	2	2	1.3	2.27	1.7e-05	191616	HOMO SAPIENS	CLH1_HUMAN Clathrin heavy chain 1
Hexim1	[122]		P09661	3	3	13.3	1.83	3.5e-05	28415.8	HOMO SAPIENS	RU2A_HUMAN U2 small nuclear ribonucleoprotein A'
Hexim1	[123]		Q9H3K6	2	2	29.1	1.98	0.00061	10116.6	HOMO SAPIENS	BOLA2_HUMAN BolA-like protein 2
Hexim1	[124]		P62424	2	2	9	1.95	0.00052	29995.9	HOMO SAPIENS	RL7A_HUMAN 60S ribosomal protein L7a
Hexim1	[125]		Q12906	2	3	3.7	1.77	0.0039	95339.2	HOMO SAPIENS	ILF3_HUMAN Interleukin enhancer-binding factor 3
Hexim1	[126]		P62318	1	1	16.7	3.45	8e-07	13916.4	HOMO SAPIENS	SMD3_HUMAN Small nuclear ribonucleoprotein Sm D3
Hexim1	[127]		Q96B23	2	2	7.4	2.25	8.3e-06	43324.3	HOMO SAPIENS	CR025_HUMAN Uncharacterized protein C18orf25
Hexim1	[128]		Q9UMS4	3	3	18.7	1.32	0.00055	55181.3	HOMO SAPIENS	PRP19_HUMAN Pre-mRNA-processing factor 19
Hexim1	[129]		P17980	2	2	8.2	1.76	0.00021	49204	HOMO SAPIENS	PRS6A_HUMAN 26S protease regulatory subunit 6A
Hexim1	[130]		P63173	4	7	34.3	1.07	0.00065	8218	HOMO SAPIENS	RL38_HUMAN 60S ribosomal protein L38
Hexim1	[131]		P63220	2	2	39.8	1.86	0.00014	9111.5	HOMO SAPIENS	RS21_HUMAN 40S ribosomal protein S21
Hexim1	[132]		P84098	2	4	13.3	1.63	0.0013	23466.2	HOMO SAPIENS	RL19_HUMAN 60S ribosomal protein L19
Hexim1	[133]		P05141	1	1	4.4	3.19	9.9e-06	32852.5	HOMO SAPIENS	ADT2_HUMAN ADP/ATP translocase 2
Hexim1	[134]		Q8NCA5	1	1	2.9	3.18	8.7e-07	55401.2	HOMO SAPIENS	FA98A_HUMAN Protein FAM98A
Hexim1	[135]		P42766	2	2	18.7	1.59	0.0032	14551.6	HOMO SAPIENS	RL35_HUMAN 60S ribosomal protein L35
Hexim1	[136]		Q9BY77	3	3	11.6	1.18	0.00062	46089.7	HOMO SAPIENS	PDIP3_HUMAN Polymerase delta-interacting protein 3
Hexim1	[137]		Q92522	2	2	13.6	1.91	9.7e-05	22487.3	HOMO SAPIENS	H1X_HUMAN Histone H1x
Hexim1	[138]		P07814	1	1	2	3.05	3.4e-06	170592	HOMO SAPIENS	SYEP_HUMAN Bifunctional glutamate/proline--tRNA ligase
Hexim1	[139]		Q06830	2	2	10.1	1.96	5.6e-05	22110.5	HOMO SAPIENS	PRDX1_HUMAN Peroxiredoxin-1
Hexim1	[140]		P23284	2	2	10.2	1.8	0.00019	23742.7	HOMO SAPIENS	PPIB_HUMAN Peptidyl-prolyl cis-trans isomerase B
Hexim1	[141]		P62888	2	2	24.3	1.57	0.00029	12784.2	HOMO SAPIENS	RL30_HUMAN 60S ribosomal protein L30
Hexim1	[142]		Q92552	1	1	5.8	2.83	1.2e-05	47611.8	HOMO SAPIENS	RT27_HUMAN 28S ribosomal protein S27, mitochondrial
Hexim1	[143]		Q99575	4	4	5.6	0.82	0.0024	114710	HOMO SAPIENS	POP1_HUMAN Ribonucleases P/MRP protein subunit POP1
Hexim1	[144]		P35268	1	1	10.2	2.67	1.4e-05	14787.1	HOMO SAPIENS	RL22_HUMAN 60S ribosomal protein L22
Hexim1	[145]		P82921	1	1	16.1	2.61	6.3e-06	10741.7	HOMO SAPIENS	RT21_HUMAN 28S ribosomal protein S21, mitochondrial
Hexim1	[146]		Q9NXG2	1	1	4.2	2.51	3.7e-05	39315.7	HOMO SAPIENS	THUM1_HUMAN THUMP domain-containing protein 1
Hexim1	[147]		Q9Y2R5	1	1	22.3	2.49	7.8e-05	14502.2	HOMO SAPIENS	RT17_HUMAN 28S ribosomal protein S17, mitochondrial
Hexim1	[148]		P61978	2	2	8.6	1.68	4.1e-05	50976.7	HOMO SAPIENS	HNRPK_HUMAN Heterogeneous nuclear ribonucleoprotein K
Hexim1	[149]		Q9Y3D9	2	2	10.5	1.51	0.00069	21770.8	HOMO SAPIENS	RT23_HUMAN 28S ribosomal protein S23, mitochondrial
Hexim1	[150]		P84090	1	1	11.5	2.43	1.9e-05	12259.1	HOMO SAPIENS	ERH_HUMAN Enhancer of rudimentary homolog
Hexim1	[151]		Q14103	2	2	6.8	1.51	0.00014	38434.5	HOMO SAPIENS	HNRPD_HUMAN Heterogeneous nuclear ribonucleoprotein D0
Hexim1	[151-1]	0	O14979	1	1	2.4	1.37	0.00014	46437.9	HOMO SAPIENS	HNRDL_HUMAN Heterogeneous nuclear ribonucleoprotein D-like
Hexim1	[151-2]	0	Q99729	1	1	3	1.37	0.00014	36225.2	HOMO SAPIENS	ROAA_HUMAN Heterogeneous nuclear ribonucleoprotein A/B
Hexim1	[152]		O75607	1	1	9.6	2.34	1.6e-05	19343.9	HOMO SAPIENS	NPM3_HUMAN Nucleoplasmin-3
Hexim1	[153]		P62316	1	1	8.5	2.2	2.7e-05	13527	HOMO SAPIENS	SMD2_HUMAN Small nuclear ribonucleoprotein Sm D2
Hexim1	[154]		O00571	1	1	5.3	2.15	8.3e-05	73244	HOMO SAPIENS	DDX3X_HUMAN ATP-dependent RNA helicase DDX3X
Hexim1	[155]		Q9Y237	1	1	22.9	2.08	0.00013	13810.1	HOMO SAPIENS	PIN4_HUMAN Peptidyl-prolyl cis-trans isomerase NIMA-interacting 4
Hexim1	[156]		P61163	2	2	11.7	1.02	0.0045	42614.1	HOMO SAPIENS	ACTZ_HUMAN Alpha-centractin
Hexim1	[157]		P26373	1	1	5.2	2.01	0.0004	24261.7	HOMO SAPIENS	RL13_HUMAN 60S ribosomal protein L13
Hexim1	[158]		Q07065	1	1	3	2	0.0006	66023	HOMO SAPIENS	CKAP4_HUMAN Cytoskeleton-associated protein 4
Hexim1	[159]		P13639	2	2	3	1.41	0.00013	95339	HOMO SAPIENS	EF2_HUMAN Elongation factor 2
Hexim1	[160]		P62917	1	1	4.3	1.97	0.00032	28024.9	HOMO SAPIENS	RL8_HUMAN 60S ribosomal protein L8
Hexim1	[161]		Q13347	1	1	3.7	1.91	1.4e-05	36502.2	HOMO SAPIENS	EIF3I_HUMAN Eukaryotic translation initiation factor 3 subunit I
Hexim1	[162]		P62273	2	2	35.7	0.96	0.0023	6676.8	HOMO SAPIENS	RS29_HUMAN 40S ribosomal protein S29
Hexim1	[163]		P05386	1	1	14	1.9	0.00014	11514	HOMO SAPIENS	RLA1_HUMAN 60S acidic ribosomal protein P1
Hexim1	[164]		O15371	1	1	4.6	1.84	0.00017	63973.3	HOMO SAPIENS	EIF3D_HUMAN Eukaryotic translation initiation factor 3 subunit D
Hexim1	[165]		Q16643	1	1	4.3	1.78	0.00022	71429.9	HOMO SAPIENS	DREB_HUMAN Drebrin
Hexim1	[166]		O14818	1	1	4.4	1.78	0.00015	27887.1	HOMO SAPIENS	PSA7_HUMAN Proteasome subunit alpha type-7
Hexim1	[166-1]	0	Q8TAA3	1	1	4.3	1.78	0.00015	28530	HOMO SAPIENS	PSA7L_HUMAN Proteasome subunit alpha type-7-like
Hexim1	[167]		Q96DG6	1	1	6.1	1.73	0.00032	28048.4	HOMO SAPIENS	CMBL_HUMAN Carboxymethylenebutenolidase homolog
Hexim1	[168]		P49458	1	1	14	1.68	7.5e-05	10111.8	HOMO SAPIENS	SRP09_HUMAN Signal recognition particle 9 kDa protein
Hexim1	[169]		P18621	2	2	10.3	1.23	0.0004	21397.2	HOMO SAPIENS	RL17_HUMAN 60S ribosomal protein L17
Hexim1	[170]		Q7L2H7	1	1	5.1	1.59	0.00029	42503.3	HOMO SAPIENS	EIF3M_HUMAN Eukaryotic translation initiation factor 3 subunit M
Hexim1	[171]		P39023	1	2	6	1.59	0.0004	46109.3	HOMO SAPIENS	RL3_HUMAN 60S ribosomal protein L3
Hexim1	[172]		Q00325	1	1	3.3	1.58	0.00045	40095.2	HOMO SAPIENS	MPCP_HUMAN Phosphate carrier protein, mitochondrial
Hexim1	[173]		P62081	3	3	18	0.76	0.0025	22127	HOMO SAPIENS	RS7_HUMAN 40S ribosomal protein S7
Hexim1	[174]		P08238	1	1	2.6	1.47	0.00094	83264.9	HOMO SAPIENS	HS90B_HUMAN Heat shock protein HSP 90-beta
Hexim1	[175]		O43143	1	1	1.6	1.46	0.00021	90933.6	HOMO SAPIENS	DHX15_HUMAN Putative pre-mRNA-splicing factor ATP-dependent RNA helicase DHX15
Hexim1	[176]		P62987	2	3	20.3	1	0.0017	14728.5	HOMO SAPIENS	RL40_HUMAN Ubiquitin-60S ribosomal protein L40
Hexim1	[176-1]	0	P0CG47	1	2	7	0.75	0.0017	25761.8	HOMO SAPIENS	UBB_HUMAN Polyubiquitin-B
Hexim1	[176-2]	0	P0CG48	1	2	2.3	0.75	0.0017	77029.2	HOMO SAPIENS	UBC_HUMAN Polyubiquitin-C
Hexim1	[176-3]	0	P62979	1	2	10.3	0.75	0.0017	17965.1	HOMO SAPIENS	RS27A_HUMAN Ubiquitin-40S ribosomal protein S27a
Hexim1	[177]		P60866	1	4	12.6	1.43	0.0014	13372.8	HOMO SAPIENS	RS20_HUMAN 40S ribosomal protein S20
Hexim1	[178]		O75533	2	2	1.5	0.77	0.0074	145832	HOMO SAPIENS	SF3B1_HUMAN Splicing factor 3B subunit 1
Hexim1	[179]		Q96RR1	1	1	3.7	1.33	0.004	77154.8	HOMO SAPIENS	PEO1_HUMAN Twinkle protein, mitochondrial
Hexim1	[180]		Q9H2U1	1	1	2.3	1.32	0.0016	114761	HOMO SAPIENS	DHX36_HUMAN Probable ATP-dependent RNA helicase DHX36
Hexim1	[181]		P62314	1	1	10.9	1.32	0.0029	13281.7	HOMO SAPIENS	SMD1_HUMAN Small nuclear ribonucleoprotein Sm D1
Hexim1	[182]		P43686	1	1	7.9	1.29	0.00061	47366.7	HOMO SAPIENS	PRS6B_HUMAN 26S protease regulatory subunit 6B
Hexim1	[183]		Q9BXS5	1	1	2.8	1.25	0.0016	48587.3	HOMO SAPIENS	AP1M1_HUMAN AP-1 complex subunit mu-1
Hexim1	[184]		P82930	2	2	15.1	0.79	0.0056	25650.7	HOMO SAPIENS	RT34_HUMAN 28S ribosomal protein S34, mitochondrial
Hexim1	[185]		P48047	2	2	10.3	0.81	0.0017	23277.5	HOMO SAPIENS	ATPO_HUMAN ATP synthase subunit O, mitochondrial
Hexim1	[186]		decoy	1	2	1.8	1.17	0.00078	93611.4	HOMO SAPIENS	DISC1_HUMAN Disrupted in schizophrenia 1 protein
Hexim1	[187]		Q15393	1	1	0.8	1.17	0.00074	135578	HOMO SAPIENS	SF3B3_HUMAN Splicing factor 3B subunit 3
Hexim1	[188]		Q00059	1	1	4.1	1.17	0.00071	29096.9	HOMO SAPIENS	TFAM_HUMAN Transcription factor A, mitochondrial
Hexim1	[189]		P05388	2	2	7.3	0.78	0.00031	34273.8	HOMO SAPIENS	RLA0_HUMAN 60S acidic ribosomal protein P0
Hexim1	[189-1]	0	Q8NHW5	2	2	7.3	0.78	0.00031	34364.8	HOMO SAPIENS	RLA0L_HUMAN 60S acidic ribosomal protein P0-like
Hexim1	[190]		O15372	1	1	5.4	1.16	0.00022	39930.7	HOMO SAPIENS	EIF3H_HUMAN Eukaryotic translation initiation factor 3 subunit H
Hexim1	[191]		Q6MZW2	1	1	5.1	1.13	0.0084	93096.7	HOMO SAPIENS	FSTL4_HUMAN Follistatin-related protein 4
Hexim1	[192]		O60869	1	1	10.1	1.1	0.0035	16368.8	HOMO SAPIENS	EDF1_HUMAN Endothelial differentiation-related factor 1
Hexim1	[193]		P50914	1	1	5.1	1.07	0.00097	23432.1	HOMO SAPIENS	RL14_HUMAN 60S ribosomal protein L14
Hexim1	[194]		Q9Y3Y2	1	1	5.2	1.02	0.0025	26396.8	HOMO SAPIENS	CHTOP_HUMAN Chromatin target of PRMT1 protein
Hexim1	[195]		Q96BP2	1	1	9.3	1.01	0.002	13474.9	HOMO SAPIENS	CHCH1_HUMAN Coiled-coil-helix-coiled-coil-helix domain-containing protein 1
Hexim1	[196]		decoy	1	2	100	1	0.0097	5365.3	HOMO SAPIENS	INE1_HUMAN Putative inactivation escape 1 protein
Hexim1	[197]		P83881	1	1	8.5	0.97	0.0033	12440.9	HOMO SAPIENS	RL36A_HUMAN 60S ribosomal protein L36a
Hexim1	[197-1]	0	Q969Q0	1	1	8.5	0.97	0.0033	12469	HOMO SAPIENS	RL36L_HUMAN 60S ribosomal protein L36a-like
Hexim1	[198]		Q92665	1	1	2.3	0.97	0.0024	45318.8	HOMO SAPIENS	RT31_HUMAN 28S ribosomal protein S31, mitochondrial
Hexim1	[199]		P10599	1	1	8.6	0.95	0.0014	11737.6	HOMO SAPIENS	THIO_HUMAN Thioredoxin
Hexim1	[200]		P13010	1	1	3.3	0.93	0.0029	82705.3	HOMO SAPIENS	XRCC5_HUMAN X-ray repair cross-complementing protein 5
Hexim1	[201]		P18124	1	1	4.4	0.9	0.0053	29226	HOMO SAPIENS	RL7_HUMAN 60S ribosomal protein L7
Hexim1	[202]		P62244	2	4	13.1	0.62	0.0047	14839.6	HOMO SAPIENS	RS15A_HUMAN 40S ribosomal protein S15a
Hexim1	[203]		P17844	1	1	2	0.82	0.0014	69148.7	HOMO SAPIENS	DDX5_HUMAN Probable ATP-dependent RNA helicase DDX5
Hexim1	[203-1]	0	Q92841	1	1	1.8	0.82	0.0014	72372.1	HOMO SAPIENS	DDX17_HUMAN Probable ATP-dependent RNA helicase DDX17
Hexim1	[204]		Q13428	1	1	0.9	0.8	0.00069	152107	HOMO SAPIENS	TCOF_HUMAN Treacle protein
Hexim1	[205]		Q6YI46	1	1	7.1	0.8	0.0018	39665.1	HOMO SAPIENS	TMM64_HUMAN Transmembrane protein 64
Hexim1	[206]		Q9Y3D3	1	1	13.1	0.77	0.005	15345	HOMO SAPIENS	RT16_HUMAN 28S ribosomal protein S16, mitochondrial
Hexim1	[207]		P22626	2	2	7.1	0.55	0.0028	37430	HOMO SAPIENS	ROA2_HUMAN Heterogeneous nuclear ribonucleoproteins A2/B1
Hexim1	[208]		Q6P2Q9	1	1	0.4	0.74	0.0047	273603	HOMO SAPIENS	PRP8_HUMAN Pre-mRNA-processing-splicing factor 8
Hexim1	[209]		Q9BZ29	1	1	0.5	0.67	0.0028	236448	HOMO SAPIENS	DOCK9_HUMAN Dedicator of cytokinesis protein 9
Hexim1	[210]		Q13561	1	1	2.2	0.64	0.0068	44231.4	HOMO SAPIENS	DCTN2_HUMAN Dynactin subunit 2
Hexim1	[211]		Q5SSJ5	1	1	4	0.64	0.0087	61207.5	HOMO SAPIENS	HP1B3_HUMAN Heterochromatin protein 1-binding protein 3
Hexim1	[212]		Q5R372	1	1	2.1	0.63	0.00098	92513.7	HOMO SAPIENS	RBG1L_HUMAN Rab GTPase-activating protein 1-like
Hexim1	[213]		O00487	1	1	4.2	0.63	0.003	34577.4	HOMO SAPIENS	PSDE_HUMAN 26S proteasome non-ATPase regulatory subunit 14
Hexim1	[214]		Q8N0Z8	1	1	4.6	0.62	0.002	33233.1	HOMO SAPIENS	PUSL1_HUMAN tRNA pseudouridine synthase-like 1
Hexim1	[215]		P51398	2	2	5.3	0.42	0.0071	45566.8	HOMO SAPIENS	RT29_HUMAN 28S ribosomal protein S29, mitochondrial
Hexim1	[216]		Q9BQ67	1	1	6.3	0.58	0.0052	49419.6	HOMO SAPIENS	GRWD1_HUMAN Glutamate-rich WD repeat-containing protein 1
Hexim1	[217]		P56377	1	1	12.7	0.56	0.0089	18614.9	HOMO SAPIENS	AP1S2_HUMAN AP-1 complex subunit sigma-2
Hexim1	[218]		P23526	1	1	2.8	0.52	0.0013	47716.5	HOMO SAPIENS	SAHH_HUMAN Adenosylhomocysteinase
Hexim1	[219]		Q9Y2Q9	1	1	5.3	0.5	0.0069	20843	HOMO SAPIENS	RT28_HUMAN 28S ribosomal protein S28, mitochondrial
Hexim1	[220]		P63208	1	1	17.8	0.48	0.0088	18658.2	HOMO SAPIENS	SKP1_HUMAN S-phase kinase-associated protein 1
Hexim1	[221]		Q14197	1	1	5.8	0.45	0.0034	23630.3	HOMO SAPIENS	ICT1_HUMAN Peptidyl-tRNA hydrolase ICT1, mitochondrial
Hexim1	[222]		Q9UBL6	1	1	1.4	0.44	0.004	70294.5	HOMO SAPIENS	CPNE7_HUMAN Copine-7
Hexim1	[223]		P19474	1	1	2.1	0.44	0.0051	54170.2	HOMO SAPIENS	RO52_HUMAN E3 ubiquitin-protein ligase TRIM21
Hexim1	[224]		P57723	1	1	3.5	0.37	0.0038	41482.1	HOMO SAPIENS	PCBP4_HUMAN Poly(rC)-binding protein 4
Hexim1	[225]		O43175	1	1	2.8	0.33	0.0053	56651	HOMO SAPIENS	SERA_HUMAN D-3-phosphoglycerate dehydrogenase
Hexim1	[226]		P10412	1	1	5	0.33	0.0076	21865.4	HOMO SAPIENS	H14_HUMAN Histone H1.4
Hexim1	[226-1]	0	P16402	1	1	5	0.33	0.0076	22350.1	HOMO SAPIENS	H13_HUMAN Histone H1.3
Hexim1	[226-2]	0	P16403	1	1	5.2	0.33	0.0076	21364.9	HOMO SAPIENS	H12_HUMAN Histone H1.2
Hexim1	[226-3]	0	P22492	1	1	5.3	0.33	0.0076	22019.2	HOMO SAPIENS	H1T_HUMAN Histone H1t
Hexim1	[226-4]	0	Q02539	1	1	5.1	0.33	0.0076	21842.3	HOMO SAPIENS	H11_HUMAN Histone H1.1
Hexim1	[227]		P62266	1	1	7.7	0.29	0.0052	15807.7	HOMO SAPIENS	RS23_HUMAN 40S ribosomal protein S23
Hexim1	[228]		P11940	1	1	1.9	0.28	0.0038	70671.5	HOMO SAPIENS	PABP1_HUMAN Polyadenylate-binding protein 1
Hexim1	[229]		decoy	1	1	2.8	0.21	0.009	62760.1	HOMO SAPIENS	ZNP12_HUMAN Zinc finger protein ZnFP12
Hexim1	[230]		Q9BYN8	1	1	4.4	0.19	0.0061	24211.9	HOMO SAPIENS	RT26_HUMAN 28S ribosomal protein S26, mitochondrial
Hexim1	[231]		P49720	1	1	7.8	0.13	0.0093	22949.1	HOMO SAPIENS	PSB3_HUMAN Proteasome subunit beta type-3
Hexim1	[232]		Q6NSI4	1	1	2.1	0.1	0.0088	97555	HOMO SAPIENS	CX057_HUMAN Uncharacterized protein CXorf57
Hexim1	[233]		P32969	1	1	5.2	0.09	0.0084	21863.6	HOMO SAPIENS	RL9_HUMAN 60S ribosomal protein L9
Hexim1	[234]		decoy	1	1	3.4	0.08	0.0092	28974.1	HOMO SAPIENS	TAF9_HUMAN Transcription initiation factor TFIID subunit 9
Hexim1	[235]		Q6QNK2	1	1	1.3	0.05	0.0081	96530.7	HOMO SAPIENS	GP133_HUMAN Probable G-protein coupled receptor 133
Hexim1	[236]		Q9NV56	1	1	7.4	0.03	0.0068	22417.3	HOMO SAPIENS	MRGBP_HUMAN MRG-binding protein

## Sheet: HEXIM1 #2
Bait	Rank	Uniq Pep	Acc #	Num Unique	Peptide Count	% Cov	Best Disc Score	Best Expect Val	Protein MW	Species	Protein Name
Hexim1	[1]		P38646	40	74	54.2	6.33	2.2e-09	73681.1	HOMO SAPIENS	GRP75_HUMAN Stress-70 protein, mitochondrial
Hexim1	[2]		P11142	35	58	51.5	6.36	2.8e-10	70898.7	HOMO SAPIENS	HSP7C_HUMAN Heat shock cognate 71 kDa protein
Hexim1	[2-1]	31	P08107	35	81	57.3	5.9	2.3e-09	70052.8	HOMO SAPIENS	HSP71_HUMAN Heat shock 70 kDa protein 1A/1B
Hexim1	[2-2]	12	P34931	17	40	26.8	5.39	2.3e-09	70375.6	HOMO SAPIENS	HS71L_HUMAN Heat shock 70 kDa protein 1-like
Hexim1	[2-3]	15	P11021	17	18	32.6	4.68	5.7e-08	72333.5	HOMO SAPIENS	GRP78_HUMAN 78 kDa glucose-regulated protein
Hexim1	[2-4]	0	P54652	12	18	16.3	4.52	1.6e-07	70021.5	HOMO SAPIENS	HSP72_HUMAN Heat shock-related 70 kDa protein 2
Hexim1	[2-5]	6	P17066	11	20	18.2	4.5	4.6e-08	71028.7	HOMO SAPIENS	HSP76_HUMAN Heat shock 70 kDa protein 6
Hexim1	[2-6]	4	P48741	6	13	16.3	4.5	4.6e-08	40244.8	HOMO SAPIENS	HSP77_HUMAN Putative heat shock 70 kDa protein 7
Hexim1	[3]		O94992	25	122	68.5	6.39	2.6e-10	40623.8	HOMO SAPIENS	HEXI1_HUMAN Protein HEXIM1
Hexim1	[3-1]	3	Q96MH2	4	9	12.2	1.75	0.00079	32418.8	HOMO SAPIENS	HEXI2_HUMAN Protein HEXIM2
Hexim1	[4]		P23396	26	94	81.1	5.48	7.6e-09	26688.6	HOMO SAPIENS	RS3_HUMAN 40S ribosomal protein S3
Hexim1	[5]		P68400	23	58	57.8	5.76	1.8e-09	45144	HOMO SAPIENS	CSK21_HUMAN Casein kinase II subunit alpha
Hexim1	[5-1]	19	P19784	21	57	66	5.62	1.1e-08	41213.6	HOMO SAPIENS	CSK22_HUMAN Casein kinase II subunit alpha'
Hexim1	[6]		P46777	23	62	40.4	5.47	1.1e-08	34362.9	HOMO SAPIENS	RL5_HUMAN 60S ribosomal protein L5
Hexim1	[7]		P04264	23	33	39.6	4.82	4.8e-09	66039.2	HOMO SAPIENS	K2C1_HUMAN Keratin, type II cytoskeletal 1
Hexim1	[7-1]	10	P35908	12	14	21.3	4.56	6.7e-08	65433.4	HOMO SAPIENS	K22E_HUMAN Keratin, type II cytoskeletal 2 epidermal
Hexim1	[7-2, 103-1]	2	P04259	4	8	7.3	3.42	7.5e-06	60067.4	HOMO SAPIENS	K2C6B_HUMAN Keratin, type II cytoskeletal 6B
Hexim1	[7-3]	1	P19013	2	2	3.7	1.92	0.0001	57285.7	HOMO SAPIENS	K2C4_HUMAN Keratin, type II cytoskeletal 4
Hexim1	[7-4]	0	Q7Z794	1	2	2.1	2.94	0.00014	61901.9	HOMO SAPIENS	K2C1B_HUMAN Keratin, type II cytoskeletal 1b
Hexim1	[7-5]	0	P05787	1	1	2.3	0.73	0.0025	53704.7	HOMO SAPIENS	K2C8_HUMAN Keratin, type II cytoskeletal 8
Hexim1	[7-6]	0	P08729	1	1	2.3	0.73	0.0025	51386.1	HOMO SAPIENS	K2C7_HUMAN Keratin, type II cytoskeletal 7
Hexim1	[7-7]	0	P14136	1	1	2.5	0.73	0.0025	49880.6	HOMO SAPIENS	GFAP_HUMAN Glial fibrillary acidic protein
Hexim1	[7-8]	0	Q6KB66	1	1	2.4	0.73	0.0025	50525.7	HOMO SAPIENS	K2C80_HUMAN Keratin, type II cytoskeletal 80
Hexim1	[8]		Q08211	21	25	25.9	5.33	2.6e-09	140960	HOMO SAPIENS	DHX9_HUMAN ATP-dependent RNA helicase A
Hexim1	[9]		P07437	20	27	58.3	4.55	3.7e-07	49671.3	HOMO SAPIENS	TBB5_HUMAN Tubulin beta chain
Hexim1	[9-1]	2	Q13885	16	20	47.4	4.55	3.7e-07	49907.4	HOMO SAPIENS	TBB2A_HUMAN Tubulin beta-2A chain
Hexim1	[9-2]	2	Q9BVA1	16	20	47.4	4.55	3.7e-07	49953.5	HOMO SAPIENS	TBB2B_HUMAN Tubulin beta-2B chain
Hexim1	[9-3]	3	P68371	18	23	55.5	3.77	2.9e-07	49831.5	HOMO SAPIENS	TBB4B_HUMAN Tubulin beta-4B chain
Hexim1	[9-4]	3	P04350	16	21	51.1	3.77	2.9e-07	49586.2	HOMO SAPIENS	TBB4A_HUMAN Tubulin beta-4A chain
Hexim1	[9-5]	1	Q13509	10	14	23.1	4.55	3.7e-07	50433.2	HOMO SAPIENS	TBB3_HUMAN Tubulin beta-3 chain
Hexim1	[9-6]	1	Q3ZCM7	7	7	19.8	3.77	2.9e-07	49776.5	HOMO SAPIENS	TBB8_HUMAN Tubulin beta-8 chain
Hexim1	[9-7]	0	A6NNZ2	6	6	16.4	2.29	0.0001	49573.1	HOMO SAPIENS	TBB8B_HUMAN Tubulin beta-8 chain B
Hexim1	[9-8]	1	Q9BUF5	6	6	14.3	2.29	0.0001	49857.6	HOMO SAPIENS	TBB6_HUMAN Tubulin beta-6 chain
Hexim1	[9-9]	0	A6NKZ8	4	4	8.6	2.16	0.00022	41775.5	HOMO SAPIENS	YI016_HUMAN Putative tubulin beta chain-like protein ENSP00000290377
Hexim1	[9-10]	0	Q9H4B7	2	2	4	2.16	0.00022	50327.4	HOMO SAPIENS	TBB1_HUMAN Tubulin beta-1 chain
Hexim1	[10]		P34932	17	20	29.9	4.86	8.3e-08	94331.8	HOMO SAPIENS	HSP74_HUMAN Heat shock 70 kDa protein 4
Hexim1	[10-1]	10	Q92598	11	11	18.6	4.01	3.3e-07	96865.8	HOMO SAPIENS	HS105_HUMAN Heat shock protein 105 kDa
Hexim1	[10-2]	6	O95757	8	8	12.3	3.63	3.5e-06	94513.3	HOMO SAPIENS	HS74L_HUMAN Heat shock 70 kDa protein 4L
Hexim1	[11]		Q9C0C9	23	25	24	4.08	4e-07	141295	HOMO SAPIENS	UBE2O_HUMAN Ubiquitin-conjugating enzyme E2 O
Hexim1	[12]		Q93008	21	22	10.3	4.49	5.3e-08	292282	HOMO SAPIENS	USP9X_HUMAN Probable ubiquitin carboxyl-terminal hydrolase FAF-X
Hexim1	[12-1]	1	O00507	7	7	3.1	2.82	2.1e-05	291080	HOMO SAPIENS	USP9Y_HUMAN Probable ubiquitin carboxyl-terminal hydrolase FAF-Y
Hexim1	[13]		Q9HD40	16	17	33.5	6.11	2.8e-10	55726.8	HOMO SAPIENS	SPCS_HUMAN O-phosphoseryl-tRNA(Sec) selenium transferase
Hexim1	[14]		Q00839	16	23	21.9	5.3	3.7e-08	90585.2	HOMO SAPIENS	HNRPU_HUMAN Heterogeneous nuclear ribonucleoprotein U
Hexim1	[15]		P61247	15	22	50.4	5.82	5.8e-09	29945.2	HOMO SAPIENS	RS3A_HUMAN 40S ribosomal protein S3a
Hexim1	[16]		P50750	16	22	43	4.75	1.7e-07	42777.9	HOMO SAPIENS	CDK9_HUMAN Cyclin-dependent kinase 9
Hexim1	[16-1]	2	P06493	3	3	9.8	1.23	0.0063	34095.7	HOMO SAPIENS	CDK1_HUMAN Cyclin-dependent kinase 1
Hexim1	[17]		P63261	14	20	45.6	6.06	2.2e-10	41793.2	HOMO SAPIENS	ACTG_HUMAN Actin, cytoplasmic 2
Hexim1	[17-1]	1	P60709	14	19	45.6	6.11	7.7e-11	41737.1	HOMO SAPIENS	ACTB_HUMAN Actin, cytoplasmic 1
Hexim1	[17-2]	1	P62736	7	10	20.7	4.06	2.7e-07	42009.4	HOMO SAPIENS	ACTA_HUMAN Actin, aortic smooth muscle
Hexim1	[17-3]	1	P63267	7	10	20.7	4.06	2.7e-07	41877.3	HOMO SAPIENS	ACTH_HUMAN Actin, gamma-enteric smooth muscle
Hexim1	[17-4]	1	P68032	7	10	20.7	4.06	2.7e-07	42019.4	HOMO SAPIENS	ACTC_HUMAN Actin, alpha cardiac muscle 1
Hexim1	[17-5]	1	P68133	7	10	20.7	4.06	2.7e-07	42051.4	HOMO SAPIENS	ACTS_HUMAN Actin, alpha skeletal muscle
Hexim1	[17-6]	2	Q562R1	4	6	17.6	3.52	2.7e-07	42003.6	HOMO SAPIENS	ACTBL_HUMAN Beta-actin-like protein 2
Hexim1	[17-7]	0	A5A3E0	3	4	3.6	3.06	4.4e-06	121446	HOMO SAPIENS	POTEF_HUMAN POTE ankyrin domain family member F
Hexim1	[17-8]	0	Q6S8J3	3	4	3.6	3.06	4.4e-06	121365	HOMO SAPIENS	POTEE_HUMAN POTE ankyrin domain family member E
Hexim1	[17-9]	0	Q9BYX7	2	2	7.7	3.06	4.4e-06	42016.6	HOMO SAPIENS	ACTBM_HUMAN Putative beta-actin-like protein 3
Hexim1	[17-10]	0	P0CG38	2	3	2.1	1.77	0.00052	121284	HOMO SAPIENS	POTEI_HUMAN POTE ankyrin domain family member I
Hexim1	[17-11]	0	P0CG39	2	3	2.2	1.77	0.00052	117391	HOMO SAPIENS	POTEJ_HUMAN POTE ankyrin domain family member J
Hexim1	[18]		P35527	16	22	36.1	5.6	1.1e-09	62064.8	HOMO SAPIENS	K1C9_HUMAN Keratin, type I cytoskeletal 9
Hexim1	[19]		O00411	16	17	22.1	5.18	6.1e-09	138622	HOMO SAPIENS	RPOM_HUMAN DNA-directed RNA polymerase, mitochondrial
Hexim1	[20]		P62701	16	28	52.5	5.05	5.7e-09	29598	HOMO SAPIENS	RS4X_HUMAN 40S ribosomal protein S4, X isoform
Hexim1	[20-1]	0	P22090	4	5	12.9	3.12	2.6e-06	29455.9	HOMO SAPIENS	RS4Y1_HUMAN 40S ribosomal protein S4, Y isoform 1
Hexim1	[20-2]	0	Q8TD47	4	5	14.4	3.12	2.6e-06	29295.7	HOMO SAPIENS	RS4Y2_HUMAN 40S ribosomal protein S4, Y isoform 2
Hexim1	[21]		P10809	12	14	28.8	6.07	6.1e-10	61055.2	HOMO SAPIENS	CH60_HUMAN 60 kDa heat shock protein, mitochondrial
Hexim1	[22]		Q7L2E3	21	22	21.5	4.02	8.1e-08	133939	HOMO SAPIENS	DHX30_HUMAN Putative ATP-dependent RNA helicase DHX30
Hexim1	[23]		P68363	13	23	38.4	5.61	5.1e-10	50152.1	HOMO SAPIENS	TBA1B_HUMAN Tubulin alpha-1B chain
Hexim1	[23-1]	0	P68366	10	19	28.8	5.61	5.1e-10	49924.9	HOMO SAPIENS	TBA4A_HUMAN Tubulin alpha-4A chain
Hexim1	[23-2]	0	Q71U36	11	20	32.4	3.99	3.2e-07	50136.1	HOMO SAPIENS	TBA1A_HUMAN Tubulin alpha-1A chain
Hexim1	[23-3]	0	Q9BQE3	11	20	30.3	3.79	3.2e-07	49895.8	HOMO SAPIENS	TBA1C_HUMAN Tubulin alpha-1C chain
Hexim1	[23-4]	0	Q13748	8	16	25.1	3.99	3.2e-07	49960	HOMO SAPIENS	TBA3C_HUMAN Tubulin alpha-3C/D chain
Hexim1	[23-5]	0	Q6PEY2	6	13	23.1	3.99	3.2e-07	49859	HOMO SAPIENS	TBA3E_HUMAN Tubulin alpha-3E chain
Hexim1	[23-6]	0	Q9NY65	6	10	14.9	3.5	1.3e-06	50094	HOMO SAPIENS	TBA8_HUMAN Tubulin alpha-8 chain
Hexim1	[23-7]	0	Q9H853	2	3	10.8	3.5	1.3e-06	27551.5	HOMO SAPIENS	TBA4B_HUMAN Putative tubulin-like protein alpha-4B
Hexim1	[23-8]	0	A6NHL2	1	1	2	2.8	1.1e-06	49909.2	HOMO SAPIENS	TBAL3_HUMAN Tubulin alpha chain-like 3
Hexim1	[24]		O60563	18	23	27	5.22	3.5e-10	80685.3	HOMO SAPIENS	CCNT1_HUMAN Cyclin-T1
Hexim1	[25]		P06748	13	21	34	5.36	2.6e-09	32575.3	HOMO SAPIENS	NPM_HUMAN Nucleophosmin
Hexim1	[26]		P50991	11	11	28	5.73	1.6e-08	57924.8	HOMO SAPIENS	TCPD_HUMAN T-complex protein 1 subunit delta
Hexim1	[27]		P67870	11	24	38.6	5.38	1e-08	24942.7	HOMO SAPIENS	CSK2B_HUMAN Casein kinase II subunit beta
Hexim1	[28]		P13645	13	14	25.9	5.08	1.2e-08	58827.5	HOMO SAPIENS	K1C10_HUMAN Keratin, type I cytoskeletal 10
Hexim1	[28-1]	5	P02533	7	7	14.4	3.3	1.7e-07	51561.9	HOMO SAPIENS	K1C14_HUMAN Keratin, type I cytoskeletal 14
Hexim1	[28-2]	3	P08779	5	5	9.1	2.92	1.7e-06	51268.3	HOMO SAPIENS	K1C16_HUMAN Keratin, type I cytoskeletal 16
Hexim1	[28-3]	0	Q7Z3Y7	3	3	3.9	1.82	0.0013	50567.8	HOMO SAPIENS	K1C28_HUMAN Keratin, type I cytoskeletal 28
Hexim1	[28-4]	0	Q7Z3Y8	3	3	3.9	1.82	0.0013	49822.8	HOMO SAPIENS	K1C27_HUMAN Keratin, type I cytoskeletal 27
Hexim1	[28-5]	0	Q7Z3Z0	3	3	4	1.82	0.0013	49318.3	HOMO SAPIENS	K1C25_HUMAN Keratin, type I cytoskeletal 25
Hexim1	[28-6]	0	Q7Z3Y9	2	2	1.9	1.81	0.0014	51911.1	HOMO SAPIENS	K1C26_HUMAN Keratin, type I cytoskeletal 26
Hexim1	[29]		P67809	10	11	66	5.78	5.4e-09	35924.5	HOMO SAPIENS	YBOX1_HUMAN Nuclease-sensitive element-binding protein 1
Hexim1	[29-1]	5	P16989	8	8	50.5	5.87	3.2e-09	40090.2	HOMO SAPIENS	DBPA_HUMAN DNA-binding protein A
Hexim1	[29-2]	0	Q9Y2T7	3	3	11	5.58	1.9e-08	38518.3	HOMO SAPIENS	YBOX2_HUMAN Y-box-binding protein 2
Hexim1	[30]		P78347	14	15	21.2	4.42	8.8e-08	112417	HOMO SAPIENS	GTF2I_HUMAN General transcription factor II-I
Hexim1	[30-1]	0	Q6EKJ0	1	1	0.9	0.41	0.0098	107234	HOMO SAPIENS	GTD2B_HUMAN General transcription factor II-I repeat domain-containing protein 2B
Hexim1	[30-2]	0	Q86UP8	1	1	0.9	0.41	0.0098	107232	HOMO SAPIENS	GTD2A_HUMAN General transcription factor II-I repeat domain-containing protein 2A
Hexim1	[31]		P78371	11	14	33.1	5.19	3.7e-08	57488.7	HOMO SAPIENS	TCPB_HUMAN T-complex protein 1 subunit beta
Hexim1	[32]		P19338	13	17	21.5	4.84	2.7e-08	76615	HOMO SAPIENS	NUCL_HUMAN Nucleolin
Hexim1	[33]		P08238	12	12	22	4.99	9.9e-09	83264.9	HOMO SAPIENS	HS90B_HUMAN Heat shock protein HSP 90-beta
Hexim1	[33-1]	3	P07900	7	7	10.7	2.48	1.5e-05	84660.4	HOMO SAPIENS	HS90A_HUMAN Heat shock protein HSP 90-alpha
Hexim1	[33-2]	0	Q58FF8	4	4	11.3	1.66	0.00036	44349.3	HOMO SAPIENS	H90B2_HUMAN Putative heat shock protein HSP 90-beta 2
Hexim1	[33-3]	1	P14625	2	2	2.6	2.61	1.1e-05	92469.6	HOMO SAPIENS	ENPL_HUMAN Endoplasmin
Hexim1	[33-4]	2	Q12931	3	3	6.2	1.3	0.0014	80110.7	HOMO SAPIENS	TRAP1_HUMAN Heat shock protein 75 kDa, mitochondrial
Hexim1	[33-5]	0	Q58FF7	4	4	7.5	1.25	0.0006	68325.4	HOMO SAPIENS	H90B3_HUMAN Putative heat shock protein HSP 90-beta-3
Hexim1	[33-6]	1	Q14568	2	2	6.1	1.55	0.00069	39365.1	HOMO SAPIENS	HS902_HUMAN Putative heat shock protein HSP 90-alpha A2
Hexim1	[33-7]	0	Q58FG1	1	1	3.1	2.48	1.5e-05	47712.3	HOMO SAPIENS	HS904_HUMAN Putative heat shock protein HSP 90-alpha A4
Hexim1	[33-8]	1	Q58FF6	2	2	5.7	1.07	0.0003	58264.9	HOMO SAPIENS	H90B4_HUMAN Putative heat shock protein HSP 90-beta 4
Hexim1	[34]		P50990	13	13	28.3	4.74	1.7e-08	59621.1	HOMO SAPIENS	TCPQ_HUMAN T-complex protein 1 subunit theta
Hexim1	[35]		P25398	10	16	57.6	6.23	1.8e-10	14515.1	HOMO SAPIENS	RS12_HUMAN 40S ribosomal protein S12
Hexim1	[36]		Q99832	8	8	17.7	7.72	3.2e-12	59367.2	HOMO SAPIENS	TCPH_HUMAN T-complex protein 1 subunit eta
Hexim1	[37]		P15880	10	19	32.1	4.76	7.5e-08	31324.7	HOMO SAPIENS	RS2_HUMAN 40S ribosomal protein S2
Hexim1	[38]		Q99733	10	12	37.1	5.72	1.3e-09	42823.8	HOMO SAPIENS	NP1L4_HUMAN Nucleosome assembly protein 1-like 4
Hexim1	[38-1]	4	P55209	5	5	23.3	4.14	6.8e-07	45374.5	HOMO SAPIENS	NP1L1_HUMAN Nucleosome assembly protein 1-like 1
Hexim1	[39]		P08708	9	9	59.3	5.78	2e-09	15550.3	HOMO SAPIENS	RS17_HUMAN 40S ribosomal protein S17
Hexim1	[39-1]	0	P0CW22	9	9	59.3	5.78	2e-09	15550.3	HOMO SAPIENS	RS17L_HUMAN 40S ribosomal protein S17-like
Hexim1	[40]		Q07021	9	92	41.1	4.85	3.4e-08	31362.5	HOMO SAPIENS	C1QBP_HUMAN Complement component 1 Q subcomponent-binding protein, mitochondrial
Hexim1	[41]		P05455	11	13	28.9	4.24	4.8e-07	46837.4	HOMO SAPIENS	LA_HUMAN Lupus La protein
Hexim1	[42]		O60506	13	16	33.4	4.07	1.3e-07	69603.2	HOMO SAPIENS	HNRPQ_HUMAN Heterogeneous nuclear ribonucleoprotein Q
Hexim1	[42-1]	6	O43390	10	11	19.6	3.34	1.2e-05	70943.6	HOMO SAPIENS	HNRPR_HUMAN Heterogeneous nuclear ribonucleoprotein R
Hexim1	[43]		Q9NR30	13	14	24.3	4.13	7.4e-08	87345.1	HOMO SAPIENS	DDX21_HUMAN Nucleolar RNA helicase 2
Hexim1	[43-1]	0	Q9BQ39	2	2	3.7	2.41	4e-05	82565.7	HOMO SAPIENS	DDX50_HUMAN ATP-dependent RNA helicase DDX50
Hexim1	[44]		P82933	8	10	27.3	5.29	1.8e-08	45835.2	HOMO SAPIENS	RT09_HUMAN 28S ribosomal protein S9, mitochondrial
Hexim1	[45]		O60814	8	18	28.6	5.45	2.7e-09	13890.3	HOMO SAPIENS	H2B1K_HUMAN Histone H2B type 1-K
Hexim1	[45-1]	0	P57053	8	18	28.6	5.45	2.7e-09	13944.3	HOMO SAPIENS	H2BFS_HUMAN Histone H2B type F-S
Hexim1	[45-2]	0	P58876	8	18	28.6	5.45	2.7e-09	13936.3	HOMO SAPIENS	H2B1D_HUMAN Histone H2B type 1-D
Hexim1	[45-3]	0	P62807	8	18	28.6	5.45	2.7e-09	13906.3	HOMO SAPIENS	H2B1C_HUMAN Histone H2B type 1-C/E/F/G/I
Hexim1	[45-4]	0	Q5QNW6	8	18	28.6	5.45	2.7e-09	13920.3	HOMO SAPIENS	H2B2F_HUMAN Histone H2B type 2-F
Hexim1	[45-5]	0	Q93079	8	18	28.6	5.45	2.7e-09	13892.2	HOMO SAPIENS	H2B1H_HUMAN Histone H2B type 1-H
Hexim1	[45-6]	0	Q99877	8	18	28.6	5.45	2.7e-09	13922.3	HOMO SAPIENS	H2B1N_HUMAN Histone H2B type 1-N
Hexim1	[45-7]	0	Q99879	8	18	28.6	5.45	2.7e-09	13989.4	HOMO SAPIENS	H2B1M_HUMAN Histone H2B type 1-M
Hexim1	[45-8]	0	Q99880	8	18	28.6	5.45	2.7e-09	13952.3	HOMO SAPIENS	H2B1L_HUMAN Histone H2B type 1-L
Hexim1	[45-9]	0	P06899	6	16	20.6	5.45	2.7e-09	13904.3	HOMO SAPIENS	H2B1J_HUMAN Histone H2B type 1-J
Hexim1	[45-10]	0	P23527	6	16	20.6	5.45	2.7e-09	13906.3	HOMO SAPIENS	H2B1O_HUMAN Histone H2B type 1-O
Hexim1	[45-11]	0	P33778	6	16	20.6	5.45	2.7e-09	13950.3	HOMO SAPIENS	H2B1B_HUMAN Histone H2B type 1-B
Hexim1	[45-12]	0	Q16778	6	16	20.6	5.45	2.7e-09	13920.3	HOMO SAPIENS	H2B2E_HUMAN Histone H2B type 2-E
Hexim1	[45-13]	0	Q8N257	6	16	20.6	5.45	2.7e-09	13908.2	HOMO SAPIENS	H2B3B_HUMAN Histone H2B type 3-B
Hexim1	[45-14]	0	Q96A08	2	4	8.7	2.39	1.6e-05	14167.6	HOMO SAPIENS	H2B1A_HUMAN Histone H2B type 1-A
Hexim1	[46]		P62241	8	9	50	4.93	3.9e-08	24205.4	HOMO SAPIENS	RS8_HUMAN 40S ribosomal protein S8
Hexim1	[47]		P46782	8	17	41.7	4.78	2.4e-07	22876.6	HOMO SAPIENS	RS5_HUMAN 40S ribosomal protein S5
Hexim1	[48]		P21333	12	12	7.4	4.2	8.8e-08	280741	HOMO SAPIENS	FLNA_HUMAN Filamin-A
Hexim1	[49]		Q4G0J3	8	8	16.5	5.2	4.7e-09	66899.2	HOMO SAPIENS	LARP7_HUMAN La-related protein 7
Hexim1	[50]		P39019	12	15	62.8	3.76	2.9e-07	16060.6	HOMO SAPIENS	RS19_HUMAN 40S ribosomal protein S19
Hexim1	[51]		P13639	10	10	14.3	4.5	5.4e-08	95339	HOMO SAPIENS	EF2_HUMAN Elongation factor 2
Hexim1	[52]		P22626	8	10	29.7	5.6	7.6e-10	37430	HOMO SAPIENS	ROA2_HUMAN Heterogeneous nuclear ribonucleoproteins A2/B1
Hexim1	[53]		Q9NZI8	8	9	19.2	4.88	6.7e-08	63481.1	HOMO SAPIENS	IF2B1_HUMAN Insulin-like growth factor 2 mRNA-binding protein 1
Hexim1	[53-1]	1	O00425	2	2	4.7	2.68	4.9e-06	63705.6	HOMO SAPIENS	IF2B3_HUMAN Insulin-like growth factor 2 mRNA-binding protein 3
Hexim1	[53-2]	1	Q9Y6M1	2	2	4.5	2.68	4.9e-06	66121.9	HOMO SAPIENS	IF2B2_HUMAN Insulin-like growth factor 2 mRNA-binding protein 2
Hexim1	[54]		P68104	10	15	32.3	4.11	9.4e-08	50141.3	HOMO SAPIENS	EF1A1_HUMAN Elongation factor 1-alpha 1
Hexim1	[54-1]	-1	Q5VTE0	10	15	32.3	4.11	9.4e-08	50185.5	HOMO SAPIENS	EF1A3_HUMAN Putative elongation factor 1-alpha-like 3
Hexim1	[54-2]	0	Q05639	5	6	12.1	2.78	3.3e-06	50470.6	HOMO SAPIENS	EF1A2_HUMAN Elongation factor 1-alpha 2
Hexim1	[55]		P11940	7	8	12.9	6.76	1.1e-11	70671.5	HOMO SAPIENS	PABP1_HUMAN Polyadenylate-binding protein 1
Hexim1	[55-1]	0	Q13310	5	6	9.2	6.76	1.1e-11	70783.5	HOMO SAPIENS	PABP4_HUMAN Polyadenylate-binding protein 4
Hexim1	[56]		P35637	7	12	15.8	4.69	3.9e-07	53426.2	HOMO SAPIENS	FUS_HUMAN RNA-binding protein FUS
Hexim1	[56-1]	0	Q92804	2	2	3.9	3.92	3.9e-07	61830.4	HOMO SAPIENS	RBP56_HUMAN TATA-binding protein-associated factor 2N
Hexim1	[57]		P26641	8	9	22	4.32	2.5e-07	50119.2	HOMO SAPIENS	EF1G_HUMAN Elongation factor 1-gamma
Hexim1	[58]		Q9BUJ2	9	9	19.4	4.62	6.8e-08	95739.3	HOMO SAPIENS	HNRL1_HUMAN Heterogeneous nuclear ribonucleoprotein U-like protein 1
Hexim1	[59]		P62249	12	19	59.6	3.5	4.4e-07	16445.5	HOMO SAPIENS	RS16_HUMAN 40S ribosomal protein S16
Hexim1	[60]		P62829	6	12	33.6	5.71	8.5e-10	14865.6	HOMO SAPIENS	RL23_HUMAN 60S ribosomal protein L23
Hexim1	[61]		P25705	8	10	19.3	4.08	1.1e-07	59751.1	HOMO SAPIENS	ATPA_HUMAN ATP synthase subunit alpha, mitochondrial
Hexim1	[62]		P17987	8	9	18.7	4.22	4.8e-07	60344.1	HOMO SAPIENS	TCPA_HUMAN T-complex protein 1 subunit alpha
Hexim1	[63]		P52272	7	7	12.7	4.9	2.6e-07	77516.4	HOMO SAPIENS	HNRPM_HUMAN Heterogeneous nuclear ribonucleoprotein M
Hexim1	[64]		P62805	7	12	41.7	4.19	3.6e-06	11367.4	HOMO SAPIENS	H4_HUMAN Histone H4
Hexim1	[65]		P62269	10	18	52.6	3.27	7e-06	17718.8	HOMO SAPIENS	RS18_HUMAN 40S ribosomal protein S18
Hexim1	[66]		Q00610	11	13	9.4	2.91	5.8e-06	191616	HOMO SAPIENS	CLH1_HUMAN Clathrin heavy chain 1
Hexim1	[66-1]	0	P53675	1	2	0.7	1.93	0.00046	187032	HOMO SAPIENS	CLH2_HUMAN Clathrin heavy chain 2
Hexim1	[67]		Q15233	7	8	29.3	4.93	7e-08	54232	HOMO SAPIENS	NONO_HUMAN Non-POU domain-containing octamer-binding protein
Hexim1	[67-1]	7	P23246	8	8	16.4	4.11	5.3e-08	76150	HOMO SAPIENS	SFPQ_HUMAN Splicing factor, proline- and glutamine-rich
Hexim1	[68]		P46783	7	12	33.9	4.57	1.8e-07	18897.9	HOMO SAPIENS	RS10_HUMAN 40S ribosomal protein S10
Hexim1	[68-1]	0	Q9NQ39	4	8	17.6	4.57	1.8e-07	20120.5	HOMO SAPIENS	RS10L_HUMAN Putative 40S ribosomal protein S10-like
Hexim1	[69]		P61978	7	7	22.7	3.88	1.3e-06	50976.7	HOMO SAPIENS	HNRPK_HUMAN Heterogeneous nuclear ribonucleoprotein K
Hexim1	[70]		P06576	6	9	17.4	4.42	2e-07	56560.4	HOMO SAPIENS	ATPB_HUMAN ATP synthase subunit beta, mitochondrial
Hexim1	[71]		P62263	8	10	38.4	4.22	9.1e-08	16272.9	HOMO SAPIENS	RS14_HUMAN 40S ribosomal protein S14
Hexim1	[72]		Q99729	6	7	18.7	4.78	1e-07	36225.2	HOMO SAPIENS	ROAA_HUMAN Heterogeneous nuclear ribonucleoprotein A/B
Hexim1	[72-1]	3	Q14103	4	5	14.4	3.74	2.1e-06	38434.5	HOMO SAPIENS	HNRPD_HUMAN Heterogeneous nuclear ribonucleoprotein D0
Hexim1	[72-2]	1	O14979	2	3	4.3	2.03	4.2e-05	46437.9	HOMO SAPIENS	HNRDL_HUMAN Heterogeneous nuclear ribonucleoprotein D-like
Hexim1	[73]		P46781	10	13	40.7	3.55	6.2e-07	22591.6	HOMO SAPIENS	RS9_HUMAN 40S ribosomal protein S9
Hexim1	[74]		Q15393	7	7	8.1	4.29	8.2e-08	135578	HOMO SAPIENS	SF3B3_HUMAN Splicing factor 3B subunit 3
Hexim1	[75]		Q96EY7	9	11	18.9	3.25	4e-06	78550.4	HOMO SAPIENS	PTCD3_HUMAN Pentatricopeptide repeat-containing protein 3, mitochondrial
Hexim1	[76]		Q96RR1	7	7	18.1	3.75	1e-06	77154.8	HOMO SAPIENS	PEO1_HUMAN Twinkle protein, mitochondrial
Hexim1	[77]		P48643	7	8	17.6	3.36	1.1e-05	59671.6	HOMO SAPIENS	TCPE_HUMAN T-complex protein 1 subunit epsilon
Hexim1	[78]		P08865	5	5	28.8	4.83	3.5e-08	32854.4	HOMO SAPIENS	RSSA_HUMAN 40S ribosomal protein SA
Hexim1	[79]		Q13263	9	9	24.2	3.41	6.5e-07	88550.5	HOMO SAPIENS	TIF1B_HUMAN Transcription intermediary factor 1-beta
Hexim1	[80]		P35573	9	9	9.4	2.73	2.9e-05	174765	HOMO SAPIENS	GDE_HUMAN Glycogen debranching enzyme
Hexim1	[81]		Q9BY77	7	8	21.1	3.73	1e-06	46089.7	HOMO SAPIENS	PDIP3_HUMAN Polymerase delta-interacting protein 3
Hexim1	[82]		P51398	5	5	15.1	4.57	2.5e-07	45566.8	HOMO SAPIENS	RT29_HUMAN 28S ribosomal protein S29, mitochondrial
Hexim1	[83]		O43143	7	8	11.9	3.56	3e-06	90933.6	HOMO SAPIENS	DHX15_HUMAN Putative pre-mRNA-splicing factor ATP-dependent RNA helicase DHX15
Hexim1	[84]		Q01844	5	6	12.3	5.06	1.8e-08	68478.8	HOMO SAPIENS	EWS_HUMAN RNA-binding protein EWS
Hexim1	[85]		P62913	5	8	32	4.33	2.1e-07	20252.6	HOMO SAPIENS	RL11_HUMAN 60S ribosomal protein L11
Hexim1	[86]		P52597	5	7	17.8	4.67	5.9e-08	45672.3	HOMO SAPIENS	HNRPF_HUMAN Heterogeneous nuclear ribonucleoprotein F
Hexim1	[86-1]	1	P31943	3	5	9.8	3.93	8.7e-07	49229.9	HOMO SAPIENS	HNRH1_HUMAN Heterogeneous nuclear ribonucleoprotein H
Hexim1	[86-2]	2	P55795	3	3	9.8	3.93	8.7e-07	49264	HOMO SAPIENS	HNRH2_HUMAN Heterogeneous nuclear ribonucleoprotein H2
Hexim1	[87]		Q12905	5	5	21.3	5.13	8e-09	43062.5	HOMO SAPIENS	ILF2_HUMAN Interleukin enhancer-binding factor 2
Hexim1	[88]		Q8NC51	4	5	15	5.4	1.1e-08	44965.7	HOMO SAPIENS	PAIRB_HUMAN Plasminogen activator inhibitor 1 RNA-binding protein
Hexim1	[89]		P62333	5	5	21.3	4.22	5.4e-07	44173.4	HOMO SAPIENS	PRS10_HUMAN 26S protease regulatory subunit 10B
Hexim1	[90]		P49368	8	8	20.7	2.54	2.6e-05	60534.5	HOMO SAPIENS	TCPG_HUMAN T-complex protein 1 subunit gamma
Hexim1	[91]		Q15014	6	8	19.8	3.97	1.5e-07	32308.1	HOMO SAPIENS	MO4L2_HUMAN Mortality factor 4-like protein 2
Hexim1	[92]		Q13561	5	5	19	5.04	9.8e-09	44231.4	HOMO SAPIENS	DCTN2_HUMAN Dynactin subunit 2
Hexim1	[93]		Q99613	6	6	8.1	3.78	3e-06	105345	HOMO SAPIENS	EIF3C_HUMAN Eukaryotic translation initiation factor 3 subunit C
Hexim1	[94]		P06733	5	5	19.4	4.9	4.5e-09	47169.4	HOMO SAPIENS	ENOA_HUMAN Alpha-enolase
Hexim1	[94-1]	1	P09104	2	2	7.1	4.9	4.5e-09	47269	HOMO SAPIENS	ENOG_HUMAN Gamma-enolase
Hexim1	[94-2]	0	P13929	1	1	4.1	4.9	4.5e-09	46932.2	HOMO SAPIENS	ENOB_HUMAN Beta-enolase
Hexim1	[95]		P30050	4	4	35.8	5.63	2.4e-09	17818.7	HOMO SAPIENS	RL12_HUMAN 60S ribosomal protein L12
Hexim1	[96]		O60583	5	5	9.6	3.79	4.1e-06	81029.6	HOMO SAPIENS	CCNT2_HUMAN Cyclin-T2
Hexim1	[97]		O00571	5	5	13.4	3.95	4.9e-07	73244	HOMO SAPIENS	DDX3X_HUMAN ATP-dependent RNA helicase DDX3X
Hexim1	[97-1]	5	P17844	6	6	15	2.4	3.7e-05	69148.7	HOMO SAPIENS	DDX5_HUMAN Probable ATP-dependent RNA helicase DDX5
Hexim1	[97-2]	4	Q92841	5	5	9.1	2.2	0.00012	72372.1	HOMO SAPIENS	DDX17_HUMAN Probable ATP-dependent RNA helicase DDX17
Hexim1	[97-3]	0	O15523	2	2	4.2	2.71	0.00012	73154.2	HOMO SAPIENS	DDX3Y_HUMAN ATP-dependent RNA helicase DDX3Y
Hexim1	[98]		P62195	4	4	14.8	5.11	3e-08	45626.4	HOMO SAPIENS	PRS8_HUMAN 26S protease regulatory subunit 8
Hexim1	[99]		Q14011	4	6	32	5.71	4.6e-10	18648.1	HOMO SAPIENS	CIRBP_HUMAN Cold-inducible RNA-binding protein
Hexim1	[100]		P62750	5	7	34.6	4.1	3.1e-07	17695.2	HOMO SAPIENS	RL23A_HUMAN 60S ribosomal protein L23a
Hexim1	[101]		P83731	5	5	26.1	4.39	2.8e-07	17779.1	HOMO SAPIENS	RL24_HUMAN 60S ribosomal protein L24
Hexim1	[102]		Q15365	5	5	20.8	3.84	1.8e-07	37498.2	HOMO SAPIENS	PCBP1_HUMAN Poly(rC)-binding protein 1
Hexim1	[102-1]	4	Q15366	6	6	23.3	2.43	2.9e-05	38580.4	HOMO SAPIENS	PCBP2_HUMAN Poly(rC)-binding protein 2
Hexim1	[102-2]	1	P57721	3	3	12.1	2.43	2.9e-05	39465.6	HOMO SAPIENS	PCBP3_HUMAN Poly(rC)-binding protein 3
Hexim1	[103]		P13647	6	8	12	3.11	4.3e-05	62378.9	HOMO SAPIENS	K2C5_HUMAN Keratin, type II cytoskeletal 5
Hexim1	[7-2, 103-1]	2	P04259	4	8	7.3	3.42	7.5e-06	60067.4	HOMO SAPIENS	K2C6B_HUMAN Keratin, type II cytoskeletal 6B
Hexim1	[103-2]	1	P02538	3	4	5.5	3.11	4.3e-05	60045.4	HOMO SAPIENS	K2C6A_HUMAN Keratin, type II cytoskeletal 6A
Hexim1	[103-3]	1	P48668	3	4	5.5	3.11	4.3e-05	60025.4	HOMO SAPIENS	K2C6C_HUMAN Keratin, type II cytoskeletal 6C
Hexim1	[103-4]	0	O95678	1	2	2.2	3.11	4.3e-05	59560.9	HOMO SAPIENS	K2C75_HUMAN Keratin, type II cytoskeletal 75
Hexim1	[103-5]	0	Q5XKE5	1	2	2.2	3.11	4.3e-05	57836.1	HOMO SAPIENS	K2C79_HUMAN Keratin, type II cytoskeletal 79
Hexim1	[104]		P29692	6	6	30.2	3.07	4.7e-06	31122.1	HOMO SAPIENS	EF1D_HUMAN Elongation factor 1-delta
Hexim1	[105]		P23284	5	6	29.2	3.69	7.4e-07	23742.7	HOMO SAPIENS	PPIB_HUMAN Peptidyl-prolyl cis-trans isomerase B
Hexim1	[106]		O43865	6	6	15.1	2.69	4.4e-05	58952	HOMO SAPIENS	SAHH2_HUMAN Putative adenosylhomocysteinase 2
Hexim1	[106-1]	2	Q96HN2	4	4	9.3	2.45	5.3e-05	66721.8	HOMO SAPIENS	SAHH3_HUMAN Putative adenosylhomocysteinase 3
Hexim1	[107]		P35232	6	8	27.6	2.69	2.6e-05	29804.3	HOMO SAPIENS	PHB_HUMAN Prohibitin
Hexim1	[108]		P62847	4	6	29.3	4.09	2.1e-07	15423.3	HOMO SAPIENS	RS24_HUMAN 40S ribosomal protein S24
Hexim1	[109]		Q14739	4	4	8.6	5.09	5.5e-09	70703.8	HOMO SAPIENS	LBR_HUMAN Lamin-B receptor
Hexim1	[110]		P55884	6	7	10.9	2.66	0.00024	92482.4	HOMO SAPIENS	EIF3B_HUMAN Eukaryotic translation initiation factor 3 subunit B
Hexim1	[111]		Q12906	7	7	11.5	2.43	0.00022	95339.2	HOMO SAPIENS	ILF3_HUMAN Interleukin enhancer-binding factor 3
Hexim1	[112]		P04406	4	5	15.5	4.37	9.5e-08	36053.5	HOMO SAPIENS	G3P_HUMAN Glyceraldehyde-3-phosphate dehydrogenase
Hexim1	[113]		P23528	6	6	46.4	3.41	2.1e-07	18502.7	HOMO SAPIENS	COF1_HUMAN Cofilin-1
Hexim1	[113-1]	0	Q9Y281	1	1	6.6	3.41	2.1e-07	18736.8	HOMO SAPIENS	COF2_HUMAN Cofilin-2
Hexim1	[114]		Q7L2J0	6	6	21.6	3.03	5.9e-06	74355.8	HOMO SAPIENS	MEPCE_HUMAN 7SK snRNA methylphosphate capping enzyme
Hexim1	[115]		P82673	5	5	23.2	3	1.2e-05	36844.6	HOMO SAPIENS	RT35_HUMAN 28S ribosomal protein S35, mitochondrial
Hexim1	[116]		P84090	3	3	38.5	5.42	9.1e-10	12259.1	HOMO SAPIENS	ERH_HUMAN Enhancer of rudimentary homolog
Hexim1	[117]		Q13435	6	7	9.8	3.26	3.9e-06	100228	HOMO SAPIENS	SF3B2_HUMAN Splicing factor 3B subunit 2
Hexim1	[118]		P37108	5	5	33.8	3.32	3.4e-06	14570.1	HOMO SAPIENS	SRP14_HUMAN Signal recognition particle 14 kDa protein
Hexim1	[119]		P62280	7	12	47.5	2.19	4.6e-05	18430.9	HOMO SAPIENS	RS11_HUMAN 40S ribosomal protein S11
Hexim1	[120]		P12236	5	5	17.8	3.36	2.3e-06	32866.6	HOMO SAPIENS	ADT3_HUMAN ADP/ATP translocase 3
Hexim1	[120-1]	1	P05141	4	4	14.1	3.36	2.3e-06	32852.5	HOMO SAPIENS	ADT2_HUMAN ADP/ATP translocase 2
Hexim1	[120-2]	0	P12235	3	3	10.4	3.36	2.3e-06	33064.8	HOMO SAPIENS	ADT1_HUMAN ADP/ATP translocase 1
Hexim1	[120-3]	0	Q9H0C2	2	2	6.3	3.36	2.3e-06	35022.2	HOMO SAPIENS	ADT4_HUMAN ADP/ATP translocase 4
Hexim1	[121]		Q9Y224	5	5	22.5	3.02	1.5e-05	28068.3	HOMO SAPIENS	CN166_HUMAN UPF0568 protein C14orf166
Hexim1	[122]		P05388	6	6	22.4	2.42	2.4e-05	34273.8	HOMO SAPIENS	RLA0_HUMAN 60S acidic ribosomal protein P0
Hexim1	[122-1]	0	Q8NHW5	4	4	14.2	2.36	3.3e-05	34364.8	HOMO SAPIENS	RLA0L_HUMAN 60S acidic ribosomal protein P0-like
Hexim1	[123]		Q14152	6	6	5.7	2.88	4.6e-06	166571	HOMO SAPIENS	EIF3A_HUMAN Eukaryotic translation initiation factor 3 subunit A
Hexim1	[124]		P09874	5	5	5.8	2.86	3.4e-05	113085	HOMO SAPIENS	PARP1_HUMAN Poly [ADP-ribose] polymerase 1
Hexim1	[125]		P49458	4	4	46.5	3.95	1.3e-06	10111.8	HOMO SAPIENS	SRP09_HUMAN Signal recognition particle 9 kDa protein
Hexim1	[126]		P27635	6	6	32.7	2.69	3.4e-05	24604.1	HOMO SAPIENS	RL10_HUMAN 60S ribosomal protein L10
Hexim1	[126-1]	0	Q96L21	2	2	9.8	1.14	0.0031	24519	HOMO SAPIENS	RL10L_HUMAN 60S ribosomal protein L10-like
Hexim1	[127]		P82650	5	5	17.5	3.21	9.4e-06	41280.7	HOMO SAPIENS	RT22_HUMAN 28S ribosomal protein S22, mitochondrial
Hexim1	[128]		P48047	5	6	32.9	3.33	3.6e-06	23277.5	HOMO SAPIENS	ATPO_HUMAN ATP synthase subunit O, mitochondrial
Hexim1	[129]		P62979	5	5	42.3	3.84	1.6e-07	17965.1	HOMO SAPIENS	RS27A_HUMAN Ubiquitin-40S ribosomal protein S27a
Hexim1	[130]		P62277	4	5	29.1	4.02	2.1e-07	17222.4	HOMO SAPIENS	RS13_HUMAN 40S ribosomal protein S13
Hexim1	[131]		P40227	6	6	15.4	2.93	1.1e-06	58024.7	HOMO SAPIENS	TCPZ_HUMAN T-complex protein 1 subunit zeta
Hexim1	[131-1]	0	Q92526	2	2	4.3	0.24	0.0054	57822	HOMO SAPIENS	TCPW_HUMAN T-complex protein 1 subunit zeta-2
Hexim1	[132]		P62851	5	10	29.6	2.61	6.5e-05	13742.2	HOMO SAPIENS	RS25_HUMAN 40S ribosomal protein S25
Hexim1	[133]		P04908	3	10	32.3	4.99	9e-08	14135.6	HOMO SAPIENS	H2A1B_HUMAN Histone H2A type 1-B/E
Hexim1	[133-1]	0	P0C0S8	3	10	32.3	4.99	9e-08	14091.6	HOMO SAPIENS	H2A1_HUMAN Histone H2A type 1
Hexim1	[133-2]	0	P20671	3	10	32.3	4.99	9e-08	14107.6	HOMO SAPIENS	H2A1D_HUMAN Histone H2A type 1-D
Hexim1	[133-3]	0	Q16777	3	10	32.6	4.99	9e-08	13988.5	HOMO SAPIENS	H2A2C_HUMAN Histone H2A type 2-C
Hexim1	[133-4]	0	Q6FI13	3	10	32.3	4.99	9e-08	14095.6	HOMO SAPIENS	H2A2A_HUMAN Histone H2A type 2-A
Hexim1	[133-5]	0	Q7L7L0	3	10	32.3	4.99	9e-08	14121.6	HOMO SAPIENS	H2A3_HUMAN Histone H2A type 3
Hexim1	[133-6]	0	Q93077	3	10	32.3	4.99	9e-08	14105.6	HOMO SAPIENS	H2A1C_HUMAN Histone H2A type 1-C
Hexim1	[133-7]	0	Q96KK5	3	10	32.8	4.99	9e-08	13906.4	HOMO SAPIENS	H2A1H_HUMAN Histone H2A type 1-H
Hexim1	[133-8]	0	Q99878	3	10	32.8	4.99	9e-08	13936.4	HOMO SAPIENS	H2A1J_HUMAN Histone H2A type 1-J
Hexim1	[133-9]	0	Q9BTM1	3	10	32.6	4.99	9e-08	14019.5	HOMO SAPIENS	H2AJ_HUMAN Histone H2A.J
Hexim1	[133-10]	1	P0C0S5	2	3	14.8	1.36	0.0013	13552.8	HOMO SAPIENS	H2AZ_HUMAN Histone H2A.Z
Hexim1	[133-11]	1	Q71UI9	2	3	14.8	1.36	0.0013	13508.8	HOMO SAPIENS	H2AV_HUMAN Histone H2A.V
Hexim1	[133-12]	0	P16104	2	4	16.1	0.86	0.007	15144.7	HOMO SAPIENS	H2AX_HUMAN Histone H2A.x
Hexim1	[133-13]	0	Q96QV6	2	4	17.6	0.86	0.007	14233.6	HOMO SAPIENS	H2A1A_HUMAN Histone H2A type 1-A
Hexim1	[133-14]	0	Q8IUE6	1	2	6.9	0.83	0.0084	13995.4	HOMO SAPIENS	H2A2B_HUMAN Histone H2A type 2-B
Hexim1	[134]		Q9H3K6	3	4	51.2	5.4	2.1e-09	10116.6	HOMO SAPIENS	BOLA2_HUMAN BolA-like protein 2
Hexim1	[135]		P12956	5	6	10.5	3.29	2e-06	69843.7	HOMO SAPIENS	XRCC6_HUMAN X-ray repair cross-complementing protein 6
Hexim1	[136]		P10599	5	6	40	3.14	2.2e-06	11737.6	HOMO SAPIENS	THIO_HUMAN Thioredoxin
Hexim1	[137]		P52815	4	5	32.8	3.25	4.9e-06	21348.4	HOMO SAPIENS	RM12_HUMAN 39S ribosomal protein L12, mitochondrial
Hexim1	[138]		P24534	3	4	26.7	4.07	7.5e-07	24763.9	HOMO SAPIENS	EF1B_HUMAN Elongation factor 1-beta
Hexim1	[139]		Q9Y676	5	5	30.2	3.14	1.2e-06	29395.8	HOMO SAPIENS	RT18B_HUMAN 28S ribosomal protein S18b, mitochondrial
Hexim1	[140]		Q13151	3	3	15.7	4.45	5e-07	30840.9	HOMO SAPIENS	ROA0_HUMAN Heterogeneous nuclear ribonucleoprotein A0
Hexim1	[141]		O95347	6	6	6.6	2.83	4.7e-06	135657	HOMO SAPIENS	SMC2_HUMAN Structural maintenance of chromosomes protein 2
Hexim1	[142]		Q9Y2R5	3	3	44.6	4.61	7.3e-08	14502.2	HOMO SAPIENS	RT17_HUMAN 28S ribosomal protein S17, mitochondrial
Hexim1	[143]		P30048	4	4	26.6	3.24	1.2e-05	27692.9	HOMO SAPIENS	PRDX3_HUMAN Thioredoxin-dependent peroxide reductase, mitochondrial
Hexim1	[144]		P05387	3	4	55.7	4.44	3.3e-08	11665	HOMO SAPIENS	RLA2_HUMAN 60S acidic ribosomal protein P2
Hexim1	[145]		P62753	5	7	23.7	2.96	1.5e-06	28680.9	HOMO SAPIENS	RS6_HUMAN 40S ribosomal protein S6
Hexim1	[146]		P07910	4	4	13.7	3.25	3.4e-05	33670.3	HOMO SAPIENS	HNRPC_HUMAN Heterogeneous nuclear ribonucleoproteins C1/C2
Hexim1	[146-1]	0	O60812	1	1	4.1	0.22	0.0072	32142.6	HOMO SAPIENS	HNRCL_HUMAN Heterogeneous nuclear ribonucleoprotein C-like 1
Hexim1	[147]		P62854	3	3	33.9	4.49	1.8e-07	13015.5	HOMO SAPIENS	RS26_HUMAN 40S ribosomal protein S26
Hexim1	[147-1]	0	Q5JNZ5	2	2	20.9	1.65	0.005	13002.5	HOMO SAPIENS	RS26L_HUMAN Putative 40S ribosomal protein S26-like 1
Hexim1	[148]		Q06830	5	6	26.6	2.37	6.9e-05	22110.5	HOMO SAPIENS	PRDX1_HUMAN Peroxiredoxin-1
Hexim1	[148-1]	3	P32119	5	6	23.2	1.46	0.00064	21892.1	HOMO SAPIENS	PRDX2_HUMAN Peroxiredoxin-2
Hexim1	[149]		Q92552	3	3	12.1	3.83	6.3e-07	47611.8	HOMO SAPIENS	RT27_HUMAN 28S ribosomal protein S27, mitochondrial
Hexim1	[150]		P62937	3	4	32.7	4.43	6e-08	18012.7	HOMO SAPIENS	PPIA_HUMAN Peptidyl-prolyl cis-trans isomerase A
Hexim1	[150-1]	0	Q9Y536	1	1	8.5	0.65	0.00094	18182	HOMO SAPIENS	PAL4A_HUMAN Peptidyl-prolyl cis-trans isomerase A-like 4A/B/C
Hexim1	[151]		Q96B23	5	5	15.9	3.01	1.7e-07	43324.3	HOMO SAPIENS	CR025_HUMAN Uncharacterized protein C18orf25
Hexim1	[152]		Q14974	3	3	4.6	3.59	6.7e-06	97171.1	HOMO SAPIENS	IMB1_HUMAN Importin subunit beta-1
Hexim1	[153]		P39023	4	4	14.4	3.06	5.9e-06	46109.3	HOMO SAPIENS	RL3_HUMAN 60S ribosomal protein L3
Hexim1	[154]		P49327	7	7	4.1	1.88	3.7e-05	273429	HOMO SAPIENS	FAS_HUMAN Fatty acid synthase
Hexim1	[155]		Q9BQ67	4	4	16.6	3.05	2.7e-06	49419.6	HOMO SAPIENS	GRWD1_HUMAN Glutamate-rich WD repeat-containing protein 1
Hexim1	[156]		Q9Y6H1	4	4	33.8	2.66	0.00013	15512.7	HOMO SAPIENS	CHCH2_HUMAN Coiled-coil-helix-coiled-coil-helix domain-containing protein 2, mitochondrial
Hexim1	[156-1]	0	Q5T1J5	3	3	27.2	2.66	0.00013	15489.7	HOMO SAPIENS	CHCH9_HUMAN Putative coiled-coil-helix-coiled-coil-helix domain-containing protein CHCHD2P9, mitochondrial
Hexim1	[157]		P82675	4	5	11.9	3.25	3.1e-07	48006.9	HOMO SAPIENS	RT05_HUMAN 28S ribosomal protein S5, mitochondrial
Hexim1	[158]		P14618	7	7	20.5	1.77	5.2e-05	57937.4	HOMO SAPIENS	KPYM_HUMAN Pyruvate kinase isozymes M1/M2
Hexim1	[159]		P60660	4	4	34.4	3.02	2.7e-06	16930.2	HOMO SAPIENS	MYL6_HUMAN Myosin light polypeptide 6
Hexim1	[159-1]	0	P14649	2	2	11.5	2.57	4.1e-05	22764.2	HOMO SAPIENS	MYL6B_HUMAN Myosin light chain 6B
Hexim1	[160]		Q8N163	4	4	6.7	2.99	6e-06	102902	HOMO SAPIENS	K1967_HUMAN Protein KIAA1967
Hexim1	[161]		P04075	4	4	19.5	2.64	1.1e-05	39420.4	HOMO SAPIENS	ALDOA_HUMAN Fructose-bisphosphate aldolase A
Hexim1	[162]		P13010	4	4	8.3	2.72	9.5e-06	82705.3	HOMO SAPIENS	XRCC5_HUMAN X-ray repair cross-complementing protein 5
Hexim1	[163]		P11387	4	4	7.7	2.85	2.5e-05	90726.5	HOMO SAPIENS	TOP1_HUMAN DNA topoisomerase 1
Hexim1	[164]		Q9NXG2	4	4	25.8	3.34	3e-07	39315.7	HOMO SAPIENS	THUM1_HUMAN THUMP domain-containing protein 1
Hexim1	[165]		Q92665	4	4	10.4	2.83	1.2e-05	45318.8	HOMO SAPIENS	RT31_HUMAN 28S ribosomal protein S31, mitochondrial
Hexim1	[166]		P62266	3	3	23.8	3.17	5.9e-05	15807.7	HOMO SAPIENS	RS23_HUMAN 40S ribosomal protein S23
Hexim1	[167]		P50914	3	3	15.3	3.54	3.3e-06	23432.1	HOMO SAPIENS	RL14_HUMAN 60S ribosomal protein L14
Hexim1	[168]		P61163	4	6	18.6	3	1.6e-06	42614.1	HOMO SAPIENS	ACTZ_HUMAN Alpha-centractin
Hexim1	[169]		P09651	2	2	7	4.91	5.2e-08	38746.9	HOMO SAPIENS	ROA1_HUMAN Heterogeneous nuclear ribonucleoprotein A1
Hexim1	[169-1]	3	P51991	4	4	13.2	2.47	7.6e-06	39595.3	HOMO SAPIENS	ROA3_HUMAN Heterogeneous nuclear ribonucleoprotein A3
Hexim1	[169-2]	0	Q32P51	1	1	2.5	0.76	0.00093	34225.6	HOMO SAPIENS	RA1L2_HUMAN Heterogeneous nuclear ribonucleoprotein A1-like 2
Hexim1	[170]		P35606	3	3	5.7	3.49	2e-06	102488	HOMO SAPIENS	COPB2_HUMAN Coatomer subunit beta'
Hexim1	[171]		O75533	6	6	7.7	2.02	7.3e-05	145832	HOMO SAPIENS	SF3B1_HUMAN Splicing factor 3B subunit 1
Hexim1	[172]		P07814	3	3	2.9	3.19	2.7e-06	170592	HOMO SAPIENS	SYEP_HUMAN Bifunctional glutamate/proline--tRNA ligase
Hexim1	[173]		P16403	3	3	17.8	3.31	8.1e-07	21364.9	HOMO SAPIENS	H12_HUMAN Histone H1.2
Hexim1	[173-1]	1	P10412	3	3	17.4	3.31	8.1e-07	21865.4	HOMO SAPIENS	H14_HUMAN Histone H1.4
Hexim1	[173-2]	0	P16402	2	2	9.5	3.31	8.1e-07	22350.1	HOMO SAPIENS	H13_HUMAN Histone H1.3
Hexim1	[173-3]	0	P22492	1	1	5.3	3.31	8.1e-07	22019.2	HOMO SAPIENS	H1T_HUMAN Histone H1t
Hexim1	[173-4]	0	Q02539	1	1	5.1	3.31	8.1e-07	21842.3	HOMO SAPIENS	H11_HUMAN Histone H1.1
Hexim1	[174]		P63208	3	3	25.2	3.94	2e-07	18658.2	HOMO SAPIENS	SKP1_HUMAN S-phase kinase-associated protein 1
Hexim1	[175]		P62857	3	4	46.4	2.67	0.00014	7841.1	HOMO SAPIENS	RS28_HUMAN 40S ribosomal protein S28
Hexim1	[176]		P62899	4	6	32	2.7	8e-06	14463	HOMO SAPIENS	RL31_HUMAN 60S ribosomal protein L31
Hexim1	[177]		O43242	4	4	14.8	2.89	1.8e-06	60978.1	HOMO SAPIENS	PSMD3_HUMAN 26S proteasome non-ATPase regulatory subunit 3
Hexim1	[178]		Q08945	3	3	5.8	3.2	1.2e-06	81075.5	HOMO SAPIENS	SSRP1_HUMAN FACT complex subunit SSRP1
Hexim1	[179]		Q8N122	5	5	5.7	2.04	3.7e-05	149039	HOMO SAPIENS	RPTOR_HUMAN Regulatory-associated protein of mTOR
Hexim1	[180]		O00232	3	3	7.7	3.25	3.6e-06	52904.9	HOMO SAPIENS	PSD12_HUMAN 26S proteasome non-ATPase regulatory subunit 12
Hexim1	[181]		P12277	2	2	8.7	4.33	1.9e-07	42644.7	HOMO SAPIENS	KCRB_HUMAN Creatine kinase B-type
Hexim1	[182]		P55036	3	3	12.2	2.99	5.4e-07	40737	HOMO SAPIENS	PSMD4_HUMAN 26S proteasome non-ATPase regulatory subunit 4
Hexim1	[182-1]	2	A2A3N6	3	3	4.8	2.35	1e-05	95048.4	HOMO SAPIENS	PIPSL_HUMAN Putative PIP5K1A and PSMD4-like protein
Hexim1	[183]		O15372	2	2	10.5	4.27	7.5e-08	39930.7	HOMO SAPIENS	EIF3H_HUMAN Eukaryotic translation initiation factor 3 subunit H
Hexim1	[184]		O95782	3	3	5.1	3.03	9.8e-06	107547	HOMO SAPIENS	AP2A1_HUMAN AP-2 complex subunit alpha-1
Hexim1	[184-1]	0	O94973	2	2	4.2	3.03	9.8e-06	103961	HOMO SAPIENS	AP2A2_HUMAN AP-2 complex subunit alpha-2
Hexim1	[185]		Q7Z2W4	4	4	6.9	2.36	5.9e-05	101432	HOMO SAPIENS	ZCCHV_HUMAN Zinc finger CCCH-type antiviral protein 1
Hexim1	[186]		P53396	4	4	4.7	2.56	4.4e-06	120840	HOMO SAPIENS	ACLY_HUMAN ATP-citrate synthase
Hexim1	[187]		P17980	4	4	13.9	2.38	3.8e-06	49204	HOMO SAPIENS	PRS6A_HUMAN 26S protease regulatory subunit 6A
Hexim1	[188]		O00231	3	3	9.7	2.66	9.3e-05	47464.2	HOMO SAPIENS	PSD11_HUMAN 26S proteasome non-ATPase regulatory subunit 11
Hexim1	[189]		P09211	2	3	13.8	4.68	7.7e-09	23356	HOMO SAPIENS	GSTP1_HUMAN Glutathione S-transferase P
Hexim1	[190]		P62316	4	4	33.1	2.22	1.5e-05	13527	HOMO SAPIENS	SMD2_HUMAN Small nuclear ribonucleoprotein Sm D2
Hexim1	[191]		P63220	3	5	47	3.05	3.7e-06	9111.5	HOMO SAPIENS	RS21_HUMAN 40S ribosomal protein S21
Hexim1	[192]		P27361	2	2	6.3	4.46	1.8e-07	43136	HOMO SAPIENS	MK03_HUMAN Mitogen-activated protein kinase 3
Hexim1	[192-1]	1	P28482	2	2	6.7	0.87	0.0016	41390.1	HOMO SAPIENS	MK01_HUMAN Mitogen-activated protein kinase 1
Hexim1	[193]		Q04695	3	3	7.6	2.89	1.2e-06	48106.1	HOMO SAPIENS	K1C17_HUMAN Keratin, type I cytoskeletal 17
Hexim1	[193-1]	0	P08727	1	1	2.2	1.05	0.0019	44106.3	HOMO SAPIENS	K1C19_HUMAN Keratin, type I cytoskeletal 19
Hexim1	[193-2]	0	P19012	1	1	2	1.05	0.0019	49212.1	HOMO SAPIENS	K1C15_HUMAN Keratin, type I cytoskeletal 15
Hexim1	[194]		Q99615	4	4	12.1	2.02	0.00015	56441.4	HOMO SAPIENS	DNJC7_HUMAN DnaJ homolog subfamily C member 7
Hexim1	[195]		Q09028	2	2	6.6	4.05	8.8e-07	47656.1	HOMO SAPIENS	RBBP4_HUMAN Histone-binding protein RBBP4
Hexim1	[195-1]	0	Q16576	1	1	3.1	1.28	0.0011	47820.5	HOMO SAPIENS	RBBP7_HUMAN Histone-binding protein RBBP7
Hexim1	[196]		P82930	4	6	31.2	2.26	7.6e-05	25650.7	HOMO SAPIENS	RT34_HUMAN 28S ribosomal protein S34, mitochondrial
Hexim1	[197]		Q15029	3	3	4.6	2.41	1.5e-05	109437	HOMO SAPIENS	U5S1_HUMAN 116 kDa U5 small nuclear ribonucleoprotein component
Hexim1	[198]		Q99623	2	2	8.4	3.38	1.2e-05	33296.7	HOMO SAPIENS	PHB2_HUMAN Prohibitin-2
Hexim1	[199]		Q9H0D6	3	3	4.7	2.92	4.1e-06	108583	HOMO SAPIENS	XRN2_HUMAN 5'-3' exoribonuclease 2
Hexim1	[200]		P84098	2	3	13.3	4.06	6.3e-07	23466.2	HOMO SAPIENS	RL19_HUMAN 60S ribosomal protein L19
Hexim1	[201]		P55072	6	6	9.3	1.56	0.00033	89322.6	HOMO SAPIENS	TERA_HUMAN Transitional endoplasmic reticulum ATPase
Hexim1	[202]		Q9P2J5	2	2	2.3	3.62	4.2e-07	134467	HOMO SAPIENS	SYLC_HUMAN Leucine--tRNA ligase, cytoplasmic
Hexim1	[203]		P09661	3	3	16.9	3.1	1.6e-06	28415.8	HOMO SAPIENS	RU2A_HUMAN U2 small nuclear ribonucleoprotein A'
Hexim1	[204]		Q9NTJ3	4	4	3.6	2.27	3.9e-05	147183	HOMO SAPIENS	SMC4_HUMAN Structural maintenance of chromosomes protein 4
Hexim1	[205]		Q9UHB9	3	3	6.2	3.15	7.3e-08	70730.2	HOMO SAPIENS	SRP68_HUMAN Signal recognition particle 68 kDa protein
Hexim1	[206]		Q14203	4	4	3.9	2.13	3e-05	141696	HOMO SAPIENS	DCTN1_HUMAN Dynactin subunit 1
Hexim1	[207]		P22314	3	3	4.4	2.77	7.3e-06	117850	HOMO SAPIENS	UBA1_HUMAN Ubiquitin-like modifier-activating enzyme 1
Hexim1	[208]		P35998	2	2	6.5	3.43	4e-06	48634.3	HOMO SAPIENS	PRS7_HUMAN 26S protease regulatory subunit 7
Hexim1	[209]		P61604	2	2	23.5	4.52	8.5e-09	10931.8	HOMO SAPIENS	CH10_HUMAN 10 kDa heat shock protein, mitochondrial
Hexim1	[210]		Q9Y265	2	2	5.5	4.35	3.4e-08	50228.5	HOMO SAPIENS	RUVB1_HUMAN RuvB-like 1
Hexim1	[211]		P09132	2	2	18.8	3.69	3.4e-07	16155.8	HOMO SAPIENS	SRP19_HUMAN Signal recognition particle 19 kDa protein
Hexim1	[212]		P62826	4	4	21.8	1.9	0.00032	24423.3	HOMO SAPIENS	RAN_HUMAN GTP-binding nuclear protein Ran
Hexim1	[213]		P42766	3	4	18.7	2.59	0.00016	14551.6	HOMO SAPIENS	RL35_HUMAN 60S ribosomal protein L35
Hexim1	[214]		P18621	3	3	17.9	2.51	4e-05	21397.2	HOMO SAPIENS	RL17_HUMAN 60S ribosomal protein L17
Hexim1	[215]		P62244	5	6	40.8	1.81	0.00015	14839.6	HOMO SAPIENS	RS15A_HUMAN 40S ribosomal protein S15a
Hexim1	[216]		P82912	3	3	31.4	2.92	2.6e-06	20615.9	HOMO SAPIENS	RT11_HUMAN 28S ribosomal protein S11, mitochondrial
Hexim1	[217]		O14818	3	3	16.1	2.3	6.8e-06	27887.1	HOMO SAPIENS	PSA7_HUMAN Proteasome subunit alpha type-7
Hexim1	[217-1]	0	Q8TAA3	2	2	9.8	2.3	6.8e-06	28530	HOMO SAPIENS	PSA7L_HUMAN Proteasome subunit alpha type-7-like
Hexim1	[218]		P42704	3	3	3.4	2.46	2.3e-05	157906	HOMO SAPIENS	LPPRC_HUMAN Leucine-rich PPR motif-containing protein, mitochondrial
Hexim1	[219]		P07195	2	2	8.1	3.58	3.2e-07	36638.8	HOMO SAPIENS	LDHB_HUMAN L-lactate dehydrogenase B chain
Hexim1	[220]		Q16531	3	3	5.7	2.81	1.1e-05	126969	HOMO SAPIENS	DDB1_HUMAN DNA damage-binding protein 1
Hexim1	[221]		Q01105	2	2	8.3	3.1	4.4e-06	33489.1	HOMO SAPIENS	SET_HUMAN Protein SET
Hexim1	[222]		Q99459	2	2	4.7	3.19	6.2e-06	92251.4	HOMO SAPIENS	CDC5L_HUMAN Cell division cycle 5-like protein
Hexim1	[223]		P63241	3	3	36.4	2.34	4.5e-05	16832.4	HOMO SAPIENS	IF5A1_HUMAN Eukaryotic translation initiation factor 5A-1
Hexim1	[223-1]	0	Q6IS14	3	3	36.4	2.34	4.5e-05	16773.3	HOMO SAPIENS	IF5AL_HUMAN Eukaryotic translation initiation factor 5A-1-like
Hexim1	[223-2]	0	Q9GZV4	2	2	19.6	0.55	0.0019	16793.4	HOMO SAPIENS	IF5A2_HUMAN Eukaryotic translation initiation factor 5A-2
Hexim1	[224]		Q6UX04	2	2	5.7	2.89	2.1e-05	53847.5	HOMO SAPIENS	CWC27_HUMAN Peptidyl-prolyl cis-trans isomerase CWC27 homolog
Hexim1	[225]		Q9Y3D9	3	3	15.8	2.32	1.3e-05	21770.8	HOMO SAPIENS	RT23_HUMAN 28S ribosomal protein S23, mitochondrial
Hexim1	[226]		P62841	4	9	22.1	1.83	0.00013	17040.3	HOMO SAPIENS	RS15_HUMAN 40S ribosomal protein S15
Hexim1	[227]		P82921	1	1	16.1	5.27	8e-10	10741.7	HOMO SAPIENS	RT21_HUMAN 28S ribosomal protein S21, mitochondrial
Hexim1	[228]		P62158	2	2	20.1	3.48	1.1e-06	16837.7	HOMO SAPIENS	CALM_HUMAN Calmodulin
Hexim1	[229]		P35579	3	3	2.2	2.49	1.2e-05	226534	HOMO SAPIENS	MYH9_HUMAN Myosin-9
Hexim1	[230]		P32969	2	2	15.1	2.9	7e-06	21863.6	HOMO SAPIENS	RL9_HUMAN 60S ribosomal protein L9
Hexim1	[231]		O15371	3	3	11.3	2.3	4e-05	63973.3	HOMO SAPIENS	EIF3D_HUMAN Eukaryotic translation initiation factor 3 subunit D
Hexim1	[232]		O43175	6	7	16.5	1.14	0.00082	56651	HOMO SAPIENS	SERA_HUMAN D-3-phosphoglycerate dehydrogenase
Hexim1	[233]		P27708	4	4	3.6	1.48	0.0011	242986	HOMO SAPIENS	PYR1_HUMAN CAD protein
Hexim1	[234]		Q86V81	3	3	22.2	1.83	0.00073	26888.1	HOMO SAPIENS	THOC4_HUMAN THO complex subunit 4
Hexim1	[235]		P63104	2	2	9.4	3.09	7.5e-06	27745.3	HOMO SAPIENS	1433Z_HUMAN 14-3-3 protein zeta/delta
Hexim1	[236]		Q13601	4	4	16.5	1.72	7.9e-05	43665.3	HOMO SAPIENS	KRR1_HUMAN KRR1 small subunit processome component homolog
Hexim1	[237]		Q9UHX1	3	3	8.9	1.92	4.8e-05	59876	HOMO SAPIENS	PUF60_HUMAN Poly(U)-binding-splicing factor PUF60
Hexim1	[238]		Q96KR1	3	3	3.1	2.19	3.1e-05	117013	HOMO SAPIENS	ZFR_HUMAN Zinc finger RNA-binding protein
Hexim1	[239]		Q13283	2	2	5.8	3.2	8.5e-07	52164.7	HOMO SAPIENS	G3BP1_HUMAN Ras GTPase-activating protein-binding protein 1
Hexim1	[240]		Q9Y3B4	1	1	9.6	4.61	1.1e-07	14585	HOMO SAPIENS	PM14_HUMAN Pre-mRNA branch site protein p14
Hexim1	[241]		Q96DG6	3	4	13.5	2.23	5.5e-05	28048.4	HOMO SAPIENS	CMBL_HUMAN Carboxymethylenebutenolidase homolog
Hexim1	[242]		P46776	2	2	14.2	2.54	6.4e-06	16561.5	HOMO SAPIENS	RL27A_HUMAN 60S ribosomal protein L27a
Hexim1	[243]		P56192	2	2	4.2	2.49	0.00079	101117	HOMO SAPIENS	SYMC_HUMAN Methionine--tRNA ligase, cytoplasmic
Hexim1	[244]		P62081	2	3	10.3	2.91	1.4e-05	22127	HOMO SAPIENS	RS7_HUMAN 40S ribosomal protein S7
Hexim1	[245]		P35249	2	2	8.3	2.88	1e-05	39682.1	HOMO SAPIENS	RFC4_HUMAN Replication factor C subunit 4
Hexim1	[246]		P37802	2	2	11.1	2.6	3.1e-06	22391.7	HOMO SAPIENS	TAGL2_HUMAN Transgelin-2
Hexim1	[247]		P78346	2	2	11.2	2.75	3.2e-06	29321.5	HOMO SAPIENS	RPP30_HUMAN Ribonuclease P protein subunit p30
Hexim1	[248]		O94776	3	3	7.5	2.11	1.5e-05	75023.8	HOMO SAPIENS	MTA2_HUMAN Metastasis-associated protein MTA2
Hexim1	[249]		Q9Y237	2	2	32.1	2.16	5.7e-05	13810.1	HOMO SAPIENS	PIN4_HUMAN Peptidyl-prolyl cis-trans isomerase NIMA-interacting 4
Hexim1	[250]		Q07065	2	2	5	2.29	0.00023	66023	HOMO SAPIENS	CKAP4_HUMAN Cytoskeleton-associated protein 4
Hexim1	[251]		P35268	2	3	18.8	2.32	3.9e-05	14787.1	HOMO SAPIENS	RL22_HUMAN 60S ribosomal protein L22
Hexim1	[252]		P48444	3	3	6.7	1.56	0.00051	57210.9	HOMO SAPIENS	COPD_HUMAN Coatomer subunit delta
Hexim1	[253]		P01614	1	2	11.3	4.13	1.5e-07	12676.4	HOMO SAPIENS	KV201_HUMAN Ig kappa chain V-II region Cum
Hexim1	[253-1]	0	P01617	1	2	11.5	4.13	1.5e-07	12317	HOMO SAPIENS	KV204_HUMAN Ig kappa chain V-II region TEW
Hexim1	[253-2]	0	P06309	1	2	11.1	4.13	1.5e-07	12664.3	HOMO SAPIENS	KV205_HUMAN Ig kappa chain V-II region GM607 (Fragment)
Hexim1	[253-3]	0	P06310	1	2	9.8	4.13	1.5e-07	14706.8	HOMO SAPIENS	KV206_HUMAN Ig kappa chain V-II region RPMI 6410
Hexim1	[254]		Q8ND56	2	2	9.9	2.23	0.0031	50530.2	HOMO SAPIENS	LS14A_HUMAN Protein LSM14 homolog A
Hexim1	[255]		P19474	4	4	9.7	1.62	0.0001	54170.2	HOMO SAPIENS	RO52_HUMAN E3 ubiquitin-protein ligase TRIM21
Hexim1	[256]		Q9BYN8	4	4	18.5	1.38	0.0013	24211.9	HOMO SAPIENS	RT26_HUMAN 28S ribosomal protein S26, mitochondrial
Hexim1	[257]		Q9Y3Y2	2	2	10.5	2.09	0.00013	26396.8	HOMO SAPIENS	CHTOP_HUMAN Chromatin target of PRMT1 protein
Hexim1	[258]		O75607	1	1	9.6	3.99	2e-07	19343.9	HOMO SAPIENS	NPM3_HUMAN Nucleoplasmin-3
Hexim1	[259]		P05023	4	4	5	1.29	0.00087	112897	HOMO SAPIENS	AT1A1_HUMAN Sodium/potassium-transporting ATPase subunit alpha-1
Hexim1	[259-1]	0	P13637	2	2	2.4	1.27	0.001	111750	HOMO SAPIENS	AT1A3_HUMAN Sodium/potassium-transporting ATPase subunit alpha-3
Hexim1	[259-2]	0	P50993	2	2	2.4	1.27	0.001	112266	HOMO SAPIENS	AT1A2_HUMAN Sodium/potassium-transporting ATPase subunit alpha-2
Hexim1	[259-3]	0	P20648	1	1	1.4	1.27	0.001	114120	HOMO SAPIENS	ATP4A_HUMAN Potassium-transporting ATPase alpha chain 1
Hexim1	[260]		O43324	3	3	27	1.42	0.0036	19810.7	HOMO SAPIENS	MCA3_HUMAN Eukaryotic translation elongation factor 1 epsilon-1
Hexim1	[261]		Q9NX63	1	1	6.6	3.89	3.6e-08	26152.6	HOMO SAPIENS	CHCH3_HUMAN Coiled-coil-helix-coiled-coil-helix domain-containing protein 3, mitochondrial
Hexim1	[262]		Q14244	2	2	4.3	1.95	0.00025	84052.4	HOMO SAPIENS	MAP7_HUMAN Ensconsin
Hexim1	[263]		Q7L2H7	1	1	5.1	3.86	4e-06	42503.3	HOMO SAPIENS	EIF3M_HUMAN Eukaryotic translation initiation factor 3 subunit M
Hexim1	[264]		P08670	3	3	6.2	1.48	0.00092	53652.1	HOMO SAPIENS	VIME_HUMAN Vimentin
Hexim1	[264-1]	0	P41219	1	1	2.1	1.47	0.001	53651.3	HOMO SAPIENS	PERI_HUMAN Peripherin
Hexim1	[265]		P38159	3	3	9	1.73	0.00049	42332.2	HOMO SAPIENS	RBMX_HUMAN RNA-binding motif protein, X chromosome
Hexim1	[265-1]	0	Q96E39	2	2	6.9	1.73	0.00049	42141.9	HOMO SAPIENS	RMXL1_HUMAN RNA binding motif protein, X-linked-like-1
Hexim1	[266]		P14678	2	2	8.8	2.34	5.4e-06	24610.3	HOMO SAPIENS	RSMB_HUMAN Small nuclear ribonucleoprotein-associated proteins B and B'
Hexim1	[266-1]	0	P63162	2	2	8.8	2.34	5.4e-06	24614.3	HOMO SAPIENS	RSMN_HUMAN Small nuclear ribonucleoprotein-associated protein N
Hexim1	[267]		P62191	2	2	7.5	1.95	0.00055	49184.9	HOMO SAPIENS	PRS4_HUMAN 26S protease regulatory subunit 4
Hexim1	[268]		P26583	2	2	11	2.27	1e-05	24034	HOMO SAPIENS	HMGB2_HUMAN High mobility group protein B2
Hexim1	[268-1]	1	P09429	2	2	12.1	2.27	1e-05	24894	HOMO SAPIENS	HMGB1_HUMAN High mobility group protein B1
Hexim1	[268-2]	0	B2RPK0	1	1	5.7	2.27	1e-05	24238.2	HOMO SAPIENS	HGB1A_HUMAN Putative high mobility group protein B1-like 1
Hexim1	[269]		P78527	3	3	1.2	1.83	9.4e-06	469093	HOMO SAPIENS	PRKDC_HUMAN DNA-dependent protein kinase catalytic subunit
Hexim1	[270]		P60900	2	2	10.2	2.05	9.6e-05	27399.7	HOMO SAPIENS	PSA6_HUMAN Proteasome subunit alpha type-6
Hexim1	[271]		Q92522	2	3	11.7	2.41	2.7e-06	22487.3	HOMO SAPIENS	H1X_HUMAN Histone H1x
Hexim1	[272]		Q9Y3D5	1	2	13.4	3.67	2.4e-07	15849.9	HOMO SAPIENS	RT18C_HUMAN 28S ribosomal protein S18c, mitochondrial
Hexim1	[273]		P41250	2	2	4.1	2.32	1.1e-05	83166.3	HOMO SAPIENS	SYG_HUMAN Glycine--tRNA ligase
Hexim1	[274]		P25787	3	3	14.1	1.65	0.00032	25898.8	HOMO SAPIENS	PSA2_HUMAN Proteasome subunit alpha type-2
Hexim1	[275]		Q13200	1	1	1.3	3.42	3.3e-07	100201	HOMO SAPIENS	PSMD2_HUMAN 26S proteasome non-ATPase regulatory subunit 2
Hexim1	[276]		P62888	2	2	24.3	1.84	9.8e-05	12784.2	HOMO SAPIENS	RL30_HUMAN 60S ribosomal protein L30
Hexim1	[277]		O15347	2	2	12.5	2.25	1.1e-05	22980.2	HOMO SAPIENS	HMGB3_HUMAN High mobility group protein B3
Hexim1	[277-1]	0	P0C6E5	1	1	6.4	2.25	1.1e-05	21143.5	HOMO SAPIENS	HMG3M_HUMAN Putative high mobility group protein B3-like protein
Hexim1	[278]		P63173	4	6	31.4	0.95	0.001	8218	HOMO SAPIENS	RL38_HUMAN 60S ribosomal protein L38
Hexim1	[279]		P24539	2	2	12.5	1.91	4.2e-05	28908.9	HOMO SAPIENS	AT5F1_HUMAN ATP synthase subunit b, mitochondrial
Hexim1	[280]		Q9Y399	2	2	7.1	1.93	2.7e-05	33249.5	HOMO SAPIENS	RT02_HUMAN 28S ribosomal protein S2, mitochondrial
Hexim1	[281]		O60264	2	2	2.6	2.31	1.1e-05	121906	HOMO SAPIENS	SMCA5_HUMAN SWI/SNF-related matrix-associated actin-dependent regulator of chromatin subfamily A member 5
Hexim1	[282]		Q9Y2R9	2	2	10.3	1.64	0.00033	28134.3	HOMO SAPIENS	RT07_HUMAN 28S ribosomal protein S7, mitochondrial
Hexim1	[283]		P61981	1	1	5.7	3.22	3.3e-06	28302.8	HOMO SAPIENS	1433G_HUMAN 14-3-3 protein gamma
Hexim1	[284]		Q9H2U1	2	2	2.5	1.65	0.00029	114761	HOMO SAPIENS	DHX36_HUMAN Probable ATP-dependent RNA helicase DHX36
Hexim1	[285]		P31689	2	2	9.6	1.72	0.00025	44868.6	HOMO SAPIENS	DNJA1_HUMAN DnaJ homolog subfamily A member 1
Hexim1	[286]		Q9Y5B9	2	2	2.1	2.23	6e-06	119915	HOMO SAPIENS	SP16H_HUMAN FACT complex subunit SPT16
Hexim1	[287]		P09012	1	1	10.6	3.09	5.2e-06	31279.8	HOMO SAPIENS	SNRPA_HUMAN U1 small nuclear ribonucleoprotein A
Hexim1	[288]		Q99575	3	3	3.8	1.32	0.00056	114710	HOMO SAPIENS	POP1_HUMAN Ribonucleases P/MRP protein subunit POP1
Hexim1	[289]		Q9Y2Q9	2	2	10.7	1.7	0.00045	20843	HOMO SAPIENS	RT28_HUMAN 28S ribosomal protein S28, mitochondrial
Hexim1	[290]		Q5SSJ5	1	1	2.5	2.96	2.7e-06	61207.5	HOMO SAPIENS	HP1B3_HUMAN Heterochromatin protein 1-binding protein 3
Hexim1	[291]		P50502	1	1	3.8	2.93	2.4e-05	41332.1	HOMO SAPIENS	F10A1_HUMAN Hsc70-interacting protein
Hexim1	[291-1]	0	Q8IZP2	1	1	5.8	2.93	2.4e-05	27407	HOMO SAPIENS	ST134_HUMAN Putative protein FAM10A4
Hexim1	[292]		Q15181	1	1	5.2	2.93	8.8e-07	32660.3	HOMO SAPIENS	IPYR_HUMAN Inorganic pyrophosphatase
Hexim1	[293]		P26373	3	3	9	1.4	0.00013	24261.7	HOMO SAPIENS	RL13_HUMAN 60S ribosomal protein L13
Hexim1	[294]		Q13765	1	1	7	2.9	2.4e-06	23384.1	HOMO SAPIENS	NACA_HUMAN Nascent polypeptide-associated complex subunit alpha
Hexim1	[295]		Q96QR8	1	1	4.2	2.89	9.9e-06	33241.1	HOMO SAPIENS	PURB_HUMAN Transcriptional activator protein Pur-beta
Hexim1	[296]		P40938	1	1	3.9	2.8	4.3e-06	40556.7	HOMO SAPIENS	RFC3_HUMAN Replication factor C subunit 3
Hexim1	[297]		P11586	2	2	3.1	1.91	3.9e-05	101560	HOMO SAPIENS	C1TC_HUMAN C-1-tetrahydrofolate synthase, cytoplasmic
Hexim1	[298]		P62633	1	1	7.9	2.75	8.1e-06	19462.9	HOMO SAPIENS	CNBP_HUMAN Cellular nucleic acid-binding protein
Hexim1	[299]		P43686	1	1	4.5	2.75	1.2e-05	47366.7	HOMO SAPIENS	PRS6B_HUMAN 26S protease regulatory subunit 6B
Hexim1	[300]		P61254	3	3	11.7	1.02	0.0078	17258.4	HOMO SAPIENS	RL26_HUMAN 60S ribosomal protein L26
Hexim1	[301]		P62820	2	2	13.2	1.55	0.0003	22678	HOMO SAPIENS	RAB1A_HUMAN Ras-related protein Rab-1A
Hexim1	[301-1]	0	Q92928	2	2	13.4	1.55	0.0003	22017.2	HOMO SAPIENS	RAB1C_HUMAN Putative Ras-related protein Rab-1C
Hexim1	[301-2]	0	Q9H0U4	2	2	13.4	1.55	0.0003	22171.4	HOMO SAPIENS	RAB1B_HUMAN Ras-related protein Rab-1B
Hexim1	[301-3]	0	A6NDJ8	1	1	6.1	0.48	0.0026	20210.1	HOMO SAPIENS	RB43L_HUMAN Putative Rab-43-like protein ENSP00000330714
Hexim1	[301-4]	0	O95716	1	1	5	0.48	0.0026	24267.4	HOMO SAPIENS	RAB3D_HUMAN Ras-related protein Rab-3D
Hexim1	[301-5]	0	P20336	1	1	5	0.48	0.0026	24984.1	HOMO SAPIENS	RAB3A_HUMAN Ras-related protein Rab-3A
Hexim1	[301-6]	0	P20337	1	1	5	0.48	0.0026	24758.1	HOMO SAPIENS	RAB3B_HUMAN Ras-related protein Rab-3B
Hexim1	[301-7]	0	P20338	1	1	5.2	0.48	0.0026	23871.3	HOMO SAPIENS	RAB4A_HUMAN Ras-related protein Rab-4A
Hexim1	[301-8]	0	P20340	1	1	5.3	0.48	0.0026	23593	HOMO SAPIENS	RAB6A_HUMAN Ras-related protein Rab-6A
Hexim1	[301-9]	0	P59190	1	1	5.2	0.48	0.0026	24390.8	HOMO SAPIENS	RAB15_HUMAN Ras-related protein Rab-15
Hexim1	[301-10]	0	P61006	1	1	5.3	0.48	0.0026	23668.4	HOMO SAPIENS	RAB8A_HUMAN Ras-related protein Rab-8A
Hexim1	[301-11]	0	P61018	1	1	5.2	0.48	0.0026	23586.9	HOMO SAPIENS	RAB4B_HUMAN Ras-related protein Rab-4B
Hexim1	[301-12]	0	P61026	1	1	5.5	0.48	0.0026	22541.1	HOMO SAPIENS	RAB10_HUMAN Ras-related protein Rab-10
Hexim1	[301-13]	0	P61106	1	1	5.1	0.48	0.0026	23897.2	HOMO SAPIENS	RAB14_HUMAN Ras-related protein Rab-14
Hexim1	[301-14]	0	Q14964	1	1	5.1	0.48	0.0026	25006.9	HOMO SAPIENS	RB39A_HUMAN Ras-related protein Rab-39A
Hexim1	[301-15]	0	Q15286	1	1	5.5	0.48	0.0026	23025.4	HOMO SAPIENS	RAB35_HUMAN Ras-related protein Rab-35
Hexim1	[301-16]	0	Q15771	1	1	5.4	0.48	0.0026	23058.4	HOMO SAPIENS	RAB30_HUMAN Ras-related protein Rab-30
Hexim1	[301-17]	0	Q6IQ22	1	1	4.5	0.48	0.0026	27248.7	HOMO SAPIENS	RAB12_HUMAN Ras-related protein Rab-12
Hexim1	[301-18]	0	Q86YS6	1	1	5.2	0.48	0.0026	23339.6	HOMO SAPIENS	RAB43_HUMAN Ras-related protein Rab-43
Hexim1	[301-19]	0	Q92930	1	1	5.3	0.48	0.0026	23584.3	HOMO SAPIENS	RAB8B_HUMAN Ras-related protein Rab-8B
Hexim1	[301-20]	0	Q96AX2	1	1	4.9	0.48	0.0026	24815.4	HOMO SAPIENS	RAB37_HUMAN Ras-related protein Rab-37
Hexim1	[301-21]	0	Q96DA2	1	1	5.2	0.48	0.0026	24622.3	HOMO SAPIENS	RB39B_HUMAN Ras-related protein Rab-39B
Hexim1	[301-22]	0	Q96E17	1	1	4.8	0.48	0.0026	25952.4	HOMO SAPIENS	RAB3C_HUMAN Ras-related protein Rab-3C
Hexim1	[301-23]	0	Q9H082	1	1	4.8	0.48	0.0026	25717.8	HOMO SAPIENS	RB33B_HUMAN Ras-related protein Rab-33B
Hexim1	[301-24]	0	Q9NRW1	1	1	5.3	0.48	0.0026	23461.9	HOMO SAPIENS	RAB6B_HUMAN Ras-related protein Rab-6B
Hexim1	[302]		P05386	1	1	37.7	2.71	1.1e-05	11514	HOMO SAPIENS	RLA1_HUMAN 60S acidic ribosomal protein P1
Hexim1	[303]		P42677	2	2	22.6	1.58	0.00054	9461.2	HOMO SAPIENS	RS27_HUMAN 40S ribosomal protein S27
Hexim1	[303-1]	0	Q71UM5	1	1	9.5	1.58	0.00054	9477.3	HOMO SAPIENS	RS27L_HUMAN 40S ribosomal protein S27-like
Hexim1	[304]		Q92769	1	1	3.9	2.68	4.9e-05	55364.7	HOMO SAPIENS	HDAC2_HUMAN Histone deacetylase 2
Hexim1	[305]		Q02978	1	1	5.4	2.67	4.9e-05	34062	HOMO SAPIENS	M2OM_HUMAN Mitochondrial 2-oxoglutarate/malate carrier protein
Hexim1	[306]		P62258	2	2	9	1.46	0.00065	29174.2	HOMO SAPIENS	1433E_HUMAN 14-3-3 protein epsilon
Hexim1	[307]		Q9BVP2	1	1	4.4	2.58	2.6e-05	61993.7	HOMO SAPIENS	GNL3_HUMAN Guanine nucleotide-binding protein-like 3
Hexim1	[308]		P55769	1	1	9.4	2.51	3.5e-05	14173.7	HOMO SAPIENS	NH2L1_HUMAN NHP2-like protein 1
Hexim1	[309]		P13797	3	3	5.7	1.11	0.0013	70811.6	HOMO SAPIENS	PLST_HUMAN Plastin-3
Hexim1	[309-1]	0	P13796	2	2	3.5	1.11	0.0013	70289	HOMO SAPIENS	PLSL_HUMAN Plastin-2
Hexim1	[309-2]	0	Q14651	1	1	2.2	0.32	0.0093	70254.1	HOMO SAPIENS	PLSI_HUMAN Plastin-1
Hexim1	[310]		P26196	1	1	5	2.45	0.00019	54417.3	HOMO SAPIENS	DDX6_HUMAN Probable ATP-dependent RNA helicase DDX6
Hexim1	[311]		Q9Y2W1	4	4	5.7	1.11	0.00063	108667	HOMO SAPIENS	TR150_HUMAN Thyroid hormone receptor-associated protein 3
Hexim1	[312]		P00558	1	1	4.1	2.43	1.7e-05	44615.1	HOMO SAPIENS	PGK1_HUMAN Phosphoglycerate kinase 1
Hexim1	[313]		P62318	1	1	16.7	2.39	5.8e-05	13916.4	HOMO SAPIENS	SMD3_HUMAN Small nuclear ribonucleoprotein Sm D3
Hexim1	[314]		Q9UMS4	2	2	8.5	1.35	0.00054	55181.3	HOMO SAPIENS	PRP19_HUMAN Pre-mRNA-processing factor 19
Hexim1	[315]		P07737	1	1	11.4	2.34	7.3e-05	15054.4	HOMO SAPIENS	PROF1_HUMAN Profilin-1
Hexim1	[316]		Q6P158	3	3	2.5	0.98	0.0015	155606	HOMO SAPIENS	DHX57_HUMAN Putative ATP-dependent RNA helicase DHX57
Hexim1	[317]		P31942	1	1	4.9	2.33	1.4e-05	36926.8	HOMO SAPIENS	HNRH3_HUMAN Heterogeneous nuclear ribonucleoprotein H3
Hexim1	[318]		P43243	3	3	4.3	1.06	0.0019	94624	HOMO SAPIENS	MATR3_HUMAN Matrin-3
Hexim1	[319]		Q9Y295	2	2	6.8	1.31	0.0022	40542.5	HOMO SAPIENS	DRG1_HUMAN Developmentally-regulated GTP-binding protein 1
Hexim1	[320]		O14744	2	2	3.6	1.52	0.00011	72684.5	HOMO SAPIENS	ANM5_HUMAN Protein arginine N-methyltransferase 5
Hexim1	[321]		Q04837	1	1	10.1	2.22	1.3e-05	17259.8	HOMO SAPIENS	SSBP_HUMAN Single-stranded DNA-binding protein, mitochondrial
Hexim1	[322]		Q8WU90	1	1	3.3	2.18	0.00012	48602.9	HOMO SAPIENS	ZC3HF_HUMAN Zinc finger CCCH domain-containing protein 15
Hexim1	[323]		Q9BVS5	1	1	2.5	2.14	6.3e-05	52965.8	HOMO SAPIENS	TR61B_HUMAN Potential tRNA (adenine(58)-N(1))-methyltransferase catalytic subunit TRMT61B
Hexim1	[324]		Q13685	1	1	3.9	2.13	4.8e-05	46751.3	HOMO SAPIENS	AAMP_HUMAN Angio-associated migratory cell protein
Hexim1	[325]		P82914	2	3	8.6	1.48	0.00014	29842.4	HOMO SAPIENS	RT15_HUMAN 28S ribosomal protein S15, mitochondrial
Hexim1	[326]		Q00059	1	1	4.1	2.1	0.00012	29096.9	HOMO SAPIENS	TFAM_HUMAN Transcription factor A, mitochondrial
Hexim1	[327]		O00487	1	1	4.2	2.07	6.8e-05	34577.4	HOMO SAPIENS	PSDE_HUMAN 26S proteasome non-ATPase regulatory subunit 14
Hexim1	[328]		Q9Y3I0	3	3	6.3	0.97	0.00064	55210.8	HOMO SAPIENS	RTCB_HUMAN tRNA-splicing ligase RtcB homolog
Hexim1	[329]		Q92499	3	3	6.1	0.9	0.0046	82432.9	HOMO SAPIENS	DDX1_HUMAN ATP-dependent RNA helicase DDX1
Hexim1	[330]		P60866	2	2	12.6	1.35	0.00076	13372.8	HOMO SAPIENS	RS20_HUMAN 40S ribosomal protein S20
Hexim1	[331]		Q16891	1	1	1.8	1.95	7.9e-05	83678.6	HOMO SAPIENS	IMMT_HUMAN Mitochondrial inner membrane protein
Hexim1	[332]		P46379	1	1	1.1	1.95	9.1e-05	119410	HOMO SAPIENS	BAG6_HUMAN Large proline-rich protein BAG6
Hexim1	[333]		Q6P161	1	1	22.5	1.92	0.00013	15819.3	HOMO SAPIENS	RM54_HUMAN 39S ribosomal protein L54, mitochondrial
Hexim1	[334]		Q01546	1	1	1.4	1.92	0.0001	65841.3	HOMO SAPIENS	K22O_HUMAN Keratin, type II cytoskeletal 2 oral
Hexim1	[335]		Q96PK6	2	2	4.9	1.22	0.0012	69492.2	HOMO SAPIENS	RBM14_HUMAN RNA-binding protein 14
Hexim1	[336]		Q9BXW6	1	1	1.8	1.89	0.00052	108471	HOMO SAPIENS	OSBL1_HUMAN Oxysterol-binding protein-related protein 1
Hexim1	[337]		Q96GA3	2	2	4.6	1.25	0.00017	54855.4	HOMO SAPIENS	LTV1_HUMAN Protein LTV1 homolog
Hexim1	[338]		P51665	1	1	3.4	1.86	9.4e-05	37025.7	HOMO SAPIENS	PSD7_HUMAN 26S proteasome non-ATPase regulatory subunit 7
Hexim1	[339]		P26599	1	2	4.3	1.82	0.00015	57221.8	HOMO SAPIENS	PTBP1_HUMAN Polypyrimidine tract-binding protein 1
Hexim1	[340]		P14866	1	1	5.9	1.81	0.0036	64133.3	HOMO SAPIENS	HNRPL_HUMAN Heterogeneous nuclear ribonucleoprotein L
Hexim1	[341]		P54136	3	3	5.2	0.88	0.00089	75379.7	HOMO SAPIENS	SYRC_HUMAN Arginine--tRNA ligase, cytoplasmic
Hexim1	[342]		P08195	1	1	2.2	1.81	8.5e-05	67994.6	HOMO SAPIENS	4F2_HUMAN 4F2 cell-surface antigen heavy chain
Hexim1	[343]		P23526	1	1	2.5	1.77	0.00063	47716.5	HOMO SAPIENS	SAHH_HUMAN Adenosylhomocysteinase
Hexim1	[344]		Q99460	3	3	5.7	0.93	0.00082	105837	HOMO SAPIENS	PSMD1_HUMAN 26S proteasome non-ATPase regulatory subunit 1
Hexim1	[345]		Q9NVI7	3	3	5	0.92	0.0014	71369.8	HOMO SAPIENS	ATD3A_HUMAN ATPase family AAA domain-containing protein 3A
Hexim1	[346]		P09972	1	1	7.1	1.73	7.9e-05	39456.2	HOMO SAPIENS	ALDOC_HUMAN Fructose-bisphosphate aldolase C
Hexim1	[347]		P33176	2	2	2.5	0.98	0.00079	109686	HOMO SAPIENS	KINH_HUMAN Kinesin-1 heavy chain
Hexim1	[347-1]	0	O60282	1	1	1.4	0.56	0.0035	109496	HOMO SAPIENS	KIF5C_HUMAN Kinesin heavy chain isoform 5C
Hexim1	[347-2]	0	Q12840	1	1	1.3	0.56	0.0035	117379	HOMO SAPIENS	KIF5A_HUMAN Kinesin heavy chain isoform 5A
Hexim1	[348]		P18859	1	1	13.9	1.71	9.9e-05	12587.6	HOMO SAPIENS	ATP5J_HUMAN ATP synthase-coupling factor 6, mitochondrial
Hexim1	[349]		Q9Y230	3	3	8	0.71	0.0032	51157	HOMO SAPIENS	RUVB2_HUMAN RuvB-like 2
Hexim1	[350]		P14174	2	2	10.4	1.18	0.00053	12476.4	HOMO SAPIENS	MIF_HUMAN Macrophage migration inhibitory factor
Hexim1	[351]		Q9UJV9	2	2	3.7	0.93	0.00055	69838.3	HOMO SAPIENS	DDX41_HUMAN Probable ATP-dependent RNA helicase DDX41
Hexim1	[352]		Q92922	1	1	2	1.64	0.0013	122868	HOMO SAPIENS	SMRC1_HUMAN SWI/SNF complex subunit SMARCC1
Hexim1	[353]		P52292	2	2	7.2	0.88	0.006	57862.4	HOMO SAPIENS	IMA2_HUMAN Importin subunit alpha-2
Hexim1	[354]		P40926	1	1	4.7	1.61	0.0003	35503.6	HOMO SAPIENS	MDHM_HUMAN Malate dehydrogenase, mitochondrial
Hexim1	[355]		Q9Y3U8	2	2	18.1	0.81	0.0015	12253.8	HOMO SAPIENS	RL36_HUMAN 60S ribosomal protein L36
Hexim1	[356]		P62917	2	2	16	0.99	0.0015	28024.9	HOMO SAPIENS	RL8_HUMAN 60S ribosomal protein L8
Hexim1	[357]		Q9NVP1	1	1	1.8	1.58	0.00014	75407.4	HOMO SAPIENS	DDX18_HUMAN ATP-dependent RNA helicase DDX18
Hexim1	[358]		Q96S59	2	2	3.8	0.81	0.0025	77848	HOMO SAPIENS	RANB9_HUMAN Ran-binding protein 9
Hexim1	[359]		P12004	1	1	5	1.55	0.00019	28769.1	HOMO SAPIENS	PCNA_HUMAN Proliferating cell nuclear antigen
Hexim1	[360]		Q99755	2	2	4.3	0.78	0.0021	62633.9	HOMO SAPIENS	PI51A_HUMAN Phosphatidylinositol-4-phosphate 5-kinase type-1 alpha
Hexim1	[361]		Q9Y4C2	2	2	4.6	1.04	0.00064	102127	HOMO SAPIENS	F115A_HUMAN Protein FAM115A
Hexim1	[362]		Q7Z2T5	1	1	2	1.52	4.6e-05	81748.1	HOMO SAPIENS	TRM1L_HUMAN TRMT1-like protein
Hexim1	[363]		P37268	1	1	4.3	1.49	8.2e-05	48115.7	HOMO SAPIENS	FDFT_HUMAN Squalene synthase
Hexim1	[364]		P53621	1	1	1.3	1.49	0.00031	138347	HOMO SAPIENS	COPA_HUMAN Coatomer subunit alpha
Hexim1	[365]		P23921	2	2	3.5	0.85	0.00054	90071	HOMO SAPIENS	RIR1_HUMAN Ribonucleoside-diphosphate reductase large subunit
Hexim1	[366]		Q15084	1	1	3.4	1.45	0.00016	48121.7	HOMO SAPIENS	PDIA6_HUMAN Protein disulfide-isomerase A6
Hexim1	[367]		Q8IXM3	1	1	10.9	1.44	0.00034	15382.9	HOMO SAPIENS	RM41_HUMAN 39S ribosomal protein L41, mitochondrial
Hexim1	[368]		Q8NBS9	1	1	3.7	1.44	0.0028	47629.3	HOMO SAPIENS	TXND5_HUMAN Thioredoxin domain-containing protein 5
Hexim1	[369]		P60228	2	2	4.3	0.97	0.00061	52221.3	HOMO SAPIENS	EIF3E_HUMAN Eukaryotic translation initiation factor 3 subunit E
Hexim1	[370]		P07237	1	1	2.4	1.4	0.00017	57116.8	HOMO SAPIENS	PDIA1_HUMAN Protein disulfide-isomerase
Hexim1	[371]		O95400	1	1	4.1	1.37	0.00041	37646.8	HOMO SAPIENS	CD2B2_HUMAN CD2 antigen cytoplasmic tail-binding protein 2
Hexim1	[372]		P09234	1	1	11.3	1.37	0.00076	17393.9	HOMO SAPIENS	RU1C_HUMAN U1 small nuclear ribonucleoprotein C
Hexim1	[373]		P14868	2	2	5.6	0.93	0.0019	57136.7	HOMO SAPIENS	SYDC_HUMAN Aspartate--tRNA ligase, cytoplasmic
Hexim1	[374]		decoy	1	1	0.6	1.36	0.0035	670142	HOMO SAPIENS	MACF4_HUMAN Microtubule-actin cross-linking factor 1, isoform 4
Hexim1	[375]		P60981	1	1	7.9	1.36	0.00021	18505.9	HOMO SAPIENS	DEST_HUMAN Destrin
Hexim1	[376]		P51610	2	2	1.5	0.87	0.0012	208734	HOMO SAPIENS	HCFC1_HUMAN Host cell factor 1
Hexim1	[377]		P46778	2	2	20.6	0.81	0.002	18565	HOMO SAPIENS	RL21_HUMAN 60S ribosomal protein L21
Hexim1	[378]		Q9UNM6	1	1	2.7	1.34	0.00036	42945.9	HOMO SAPIENS	PSD13_HUMAN 26S proteasome non-ATPase regulatory subunit 13
Hexim1	[379]		O43813	1	1	3	1.28	0.0013	45283.5	HOMO SAPIENS	LANC1_HUMAN LanC-like protein 1
Hexim1	[380]		Q96A35	1	1	6	1.28	0.0003	24915	HOMO SAPIENS	RM24_HUMAN 39S ribosomal protein L24, mitochondrial
Hexim1	[381]		Q969G3	1	1	3.2	1.26	0.0014	46649.8	HOMO SAPIENS	SMCE1_HUMAN SWI/SNF-related matrix-associated actin-dependent regulator of chromatin subfamily E member 1
Hexim1	[382]		Q9P2N5	1	1	2	1.26	0.0021	118719	HOMO SAPIENS	RBM27_HUMAN RNA-binding protein 27
Hexim1	[383]		P05198	2	2	8.6	0.73	0.0019	36112.5	HOMO SAPIENS	IF2A_HUMAN Eukaryotic translation initiation factor 2 subunit 1
Hexim1	[384]		Q9Y3B7	2	2	15.1	0.94	0.00033	20683.4	HOMO SAPIENS	RM11_HUMAN 39S ribosomal protein L11, mitochondrial
Hexim1	[385]		Q09161	1	1	2.8	1.25	0.00012	91840.3	HOMO SAPIENS	NCBP1_HUMAN Nuclear cap-binding protein subunit 1
Hexim1	[386]		P40939	1	1	2.2	1.24	0.00015	83000.4	HOMO SAPIENS	ECHA_HUMAN Trifunctional enzyme subunit alpha, mitochondrial
Hexim1	[387]		Q99714	1	1	4.6	1.22	0.00058	26923.3	HOMO SAPIENS	HCD2_HUMAN 3-hydroxyacyl-CoA dehydrogenase type-2
Hexim1	[388]		Q9BWF3	1	1	7.7	1.21	0.0016	40314.2	HOMO SAPIENS	RBM4_HUMAN RNA-binding protein 4
Hexim1	[389]		Q13547	1	1	3.9	1.18	0.0035	55103.5	HOMO SAPIENS	HDAC1_HUMAN Histone deacetylase 1
Hexim1	[390]		O95278	1	1	3.6	1.18	0.00097	37157.9	HOMO SAPIENS	EPM2A_HUMAN Laforin
Hexim1	[391]		Q13347	1	1	3.7	1.16	0.00022	36502.2	HOMO SAPIENS	EIF3I_HUMAN Eukaryotic translation initiation factor 3 subunit I
Hexim1	[392]		Q12874	1	1	2.4	1.16	0.0013	58849.4	HOMO SAPIENS	SF3A3_HUMAN Splicing factor 3A subunit 3
Hexim1	[393]		P38919	2	2	5.4	0.86	0.0012	46871.5	HOMO SAPIENS	IF4A3_HUMAN Eukaryotic initiation factor 4A-III
Hexim1	[394]		decoy	2	2	14.8	0.7	0.0067	20900.2	HOMO SAPIENS	UBC12_HUMAN NEDD8-conjugating enzyme Ubc12
Hexim1	[395]		P04843	2	2	4.4	0.82	0.0019	68570	HOMO SAPIENS	RPN1_HUMAN Dolichyl-diphosphooligosaccharide--protein glycosyltransferase subunit 1
Hexim1	[396]		P62314	1	1	10.9	1.14	0.0026	13281.7	HOMO SAPIENS	SMD1_HUMAN Small nuclear ribonucleoprotein Sm D1
Hexim1	[397]		P83110	1	2	4	1.12	0.001	48608.3	HOMO SAPIENS	HTRA3_HUMAN Probable serine protease HTRA3
Hexim1	[398]		P27348	1	1	5.7	1.12	0.00024	27764.5	HOMO SAPIENS	1433T_HUMAN 14-3-3 protein theta
Hexim1	[399]		Q7KZF4	2	2	4.4	0.67	0.0013	101998	HOMO SAPIENS	SND1_HUMAN Staphylococcal nuclease domain-containing protein 1
Hexim1	[400]		Q13428	1	1	1.2	1.09	0.00014	152107	HOMO SAPIENS	TCOF_HUMAN Treacle protein
Hexim1	[401]		P57723	1	1	3.5	1.08	0.00074	41482.1	HOMO SAPIENS	PCBP4_HUMAN Poly(rC)-binding protein 4
Hexim1	[402]		O15226	1	1	1.6	1.07	0.00065	77673.6	HOMO SAPIENS	NKRF_HUMAN NF-kappa-B-repressing factor
Hexim1	[403]		Q86Y46	1	1	1.7	1.06	0.0013	58923.8	HOMO SAPIENS	K2C73_HUMAN Keratin, type II cytoskeletal 73
Hexim1	[404]		P02452	1	1	2.2	1.05	0.0087	138943	HOMO SAPIENS	CO1A1_HUMAN Collagen alpha-1(I) chain
Hexim1	[405]		Q9Y333	1	1	20	1.03	0.00062	10834.6	HOMO SAPIENS	LSM2_HUMAN U6 snRNA-associated Sm-like protein LSm2
Hexim1	[406]		Q16543	1	1	4.5	1.02	0.00045	44468.7	HOMO SAPIENS	CDC37_HUMAN Hsp90 co-chaperone Cdc37
Hexim1	[407]		Q8N8S7	1	1	3.6	1.02	0.00034	66510.8	HOMO SAPIENS	ENAH_HUMAN Protein enabled homolog
Hexim1	[408]		P61088	1	1	7.2	1	0.00091	17138	HOMO SAPIENS	UBE2N_HUMAN Ubiquitin-conjugating enzyme E2 N
Hexim1	[408-1]	0	Q5JXB2	1	1	7.2	1	0.00091	17377.1	HOMO SAPIENS	UE2NL_HUMAN Putative ubiquitin-conjugating enzyme E2 N-like
Hexim1	[409]		O75947	2	2	16.1	0.6	0.0023	18491.4	HOMO SAPIENS	ATP5H_HUMAN ATP synthase subunit d, mitochondrial
Hexim1	[410]		P54886	1	1	1.5	0.97	0.0009	87303.1	HOMO SAPIENS	P5CS_HUMAN Delta-1-pyrroline-5-carboxylate synthase
Hexim1	[411]		P25106	1	1	4.1	0.96	0.0019	41493.2	HOMO SAPIENS	CXCR7_HUMAN C-X-C chemokine receptor type 7
Hexim1	[412]		P61353	1	2	6.6	0.96	0.00054	15797.9	HOMO SAPIENS	RL27_HUMAN 60S ribosomal protein L27
Hexim1	[413]		Q13409	1	1	2.2	0.95	0.0034	71457.2	HOMO SAPIENS	DC1I2_HUMAN Cytoplasmic dynein 1 intermediate chain 2
Hexim1	[414]		P28074	1	1	3.8	0.95	0.002	28480.5	HOMO SAPIENS	PSB5_HUMAN Proteasome subunit beta type-5
Hexim1	[415]		P63167	1	1	24.7	0.93	0.0064	10366	HOMO SAPIENS	DYL1_HUMAN Dynein light chain 1, cytoplasmic
Hexim1	[416]		decoy	1	1	3.2	0.92	0.0023	39203.8	HOMO SAPIENS	PTAFR_HUMAN Platelet-activating factor receptor
Hexim1	[417]		P25786	1	1	4.6	0.92	0.00083	29555.9	HOMO SAPIENS	PSA1_HUMAN Proteasome subunit alpha type-1
Hexim1	[418]		Q15459	1	1	2.5	0.91	0.0011	88886.9	HOMO SAPIENS	SF3A1_HUMAN Splicing factor 3A subunit 1
Hexim1	[419]		P46459	1	1	1.6	0.9	0.0053	82595.1	HOMO SAPIENS	NSF_HUMAN Vesicle-fusing ATPase
Hexim1	[420]		Q9Y4Z0	1	1	11.5	0.9	0.00053	15349.9	HOMO SAPIENS	LSM4_HUMAN U6 snRNA-associated Sm-like protein LSm4
Hexim1	[421]		O75531	1	1	27	0.9	0.0033	10058.7	HOMO SAPIENS	BAF_HUMAN Barrier-to-autointegration factor
Hexim1	[422]		P47756	2	2	12.3	0.64	0.0046	31350.8	HOMO SAPIENS	CAPZB_HUMAN F-actin-capping protein subunit beta
Hexim1	[423]		P60842	1	1	2.5	0.89	0.0011	46154.4	HOMO SAPIENS	IF4A1_HUMAN Eukaryotic initiation factor 4A-I
Hexim1	[423-1]	0	Q14240	1	1	2.5	0.89	0.0011	46402.7	HOMO SAPIENS	IF4A2_HUMAN Eukaryotic initiation factor 4A-II
Hexim1	[424]		P29372	1	2	5	0.89	0.00088	32869	HOMO SAPIENS	3MG_HUMAN DNA-3-methyladenine glycosylase
Hexim1	[425]		O14579	1	1	6.5	0.88	0.0038	34482.3	HOMO SAPIENS	COPE_HUMAN Coatomer subunit epsilon
Hexim1	[426]		P27816	1	2	2	0.88	0.0059	121006	HOMO SAPIENS	MAP4_HUMAN Microtubule-associated protein 4
Hexim1	[427]		Q96CW1	2	2	4.1	0.67	0.0019	49655.1	HOMO SAPIENS	AP2M1_HUMAN AP-2 complex subunit mu
Hexim1	[428]		Q6YI46	1	1	7.1	0.87	0.0018	39665.1	HOMO SAPIENS	TMM64_HUMAN Transmembrane protein 64
Hexim1	[429]		P09488	1	1	6	0.86	0.00083	25712.1	HOMO SAPIENS	GSTM1_HUMAN Glutathione S-transferase Mu 1
Hexim1	[429-1]	0	P28161	1	1	6	0.86	0.00083	25744.9	HOMO SAPIENS	GSTM2_HUMAN Glutathione S-transferase Mu 2
Hexim1	[429-2]	0	Q03013	1	1	6	0.86	0.00083	25561.6	HOMO SAPIENS	GSTM4_HUMAN Glutathione S-transferase Mu 4
Hexim1	[430]		Q9H6S0	3	3	2.7	0.55	0.0014	160250	HOMO SAPIENS	YTDC2_HUMAN Probable ATP-dependent RNA helicase YTHDC2
Hexim1	[431]		Q8WVM8	1	1	2.6	0.81	0.0011	72380.5	HOMO SAPIENS	SCFD1_HUMAN Sec1 family domain-containing protein 1
Hexim1	[432]		Q7L0Y3	1	1	4.5	0.8	0.00037	47347.4	HOMO SAPIENS	MRRP1_HUMAN Mitochondrial ribonuclease P protein 1
Hexim1	[433]		P22234	2	2	5.6	0.43	0.0078	47079.7	HOMO SAPIENS	PUR6_HUMAN Multifunctional protein ADE2
Hexim1	[434]		P60174	1	1	3.5	0.77	0.0029	30791.3	HOMO SAPIENS	TPIS_HUMAN Triosephosphate isomerase
Hexim1	[435]		O75616	1	1	3.9	0.77	0.0024	48350.5	HOMO SAPIENS	ERAL1_HUMAN GTPase Era, mitochondrial
Hexim1	[436]		Q9Y3B9	1	1	3.9	0.77	0.0025	31484.5	HOMO SAPIENS	RRP15_HUMAN RRP15-like protein
Hexim1	[437]		Q15637	1	1	1.6	0.75	0.0023	68330.5	HOMO SAPIENS	SF01_HUMAN Splicing factor 1
Hexim1	[438]		O43172	1	1	2.3	0.75	0.0011	58449.7	HOMO SAPIENS	PRP4_HUMAN U4/U6 small nuclear ribonucleoprotein Prp4
Hexim1	[439]		Q9Y2H1	1	1	3.9	0.75	0.0016	54003.3	HOMO SAPIENS	ST38L_HUMAN Serine/threonine-protein kinase 38-like
Hexim1	[440]		Q15020	1	1	1.3	0.75	0.00091	109936	HOMO SAPIENS	SART3_HUMAN Squamous cell carcinoma antigen recognized by T-cells 3
Hexim1	[441]		O14602	1	1	6.9	0.74	0.0026	16442.5	HOMO SAPIENS	IF1AY_HUMAN Eukaryotic translation initiation factor 1A, Y-chromosomal
Hexim1	[441-1]	0	P47813	1	1	6.9	0.74	0.0026	16460.5	HOMO SAPIENS	IF1AX_HUMAN Eukaryotic translation initiation factor 1A, X-chromosomal
Hexim1	[442]		Q9NSD9	1	1	1.9	0.74	0.0021	66116.2	HOMO SAPIENS	SYFB_HUMAN Phenylalanine--tRNA ligase beta subunit
Hexim1	[443]		P62273	1	1	14.3	0.73	0.0031	6676.8	HOMO SAPIENS	RS29_HUMAN 40S ribosomal protein S29
Hexim1	[444]		Q6P2Q9	1	1	0.7	0.72	0.00065	273603	HOMO SAPIENS	PRP8_HUMAN Pre-mRNA-processing-splicing factor 8
Hexim1	[445]		O60869	1	1	10.1	0.72	0.0066	16368.8	HOMO SAPIENS	EDF1_HUMAN Endothelial differentiation-related factor 1
Hexim1	[446]		O43719	1	2	2.3	0.71	0.0028	85853.5	HOMO SAPIENS	HTSF1_HUMAN HIV Tat-specific factor 1
Hexim1	[447]		P28072	1	1	4.6	0.71	0.0043	25358	HOMO SAPIENS	PSB6_HUMAN Proteasome subunit beta type-6
Hexim1	[448]		Q9H3N1	1	1	4.3	0.65	0.0017	31791.5	HOMO SAPIENS	TMX1_HUMAN Thioredoxin-related transmembrane protein 1
Hexim1	[449]		decoy	1	2	1.8	0.63	0.0038	93611.4	HOMO SAPIENS	DISC1_HUMAN Disrupted in schizophrenia 1 protein
Hexim1	[450]		Q5R372	1	1	2.1	0.63	0.0013	92513.7	HOMO SAPIENS	RBG1L_HUMAN Rab GTPase-activating protein 1-like
Hexim1	[451]		Q16650	1	1	1.8	0.62	0.0088	74053.9	HOMO SAPIENS	TBR1_HUMAN T-box brain protein 1
Hexim1	[452]		decoy	1	1	1.1	0.62	0.0038	97215.2	HOMO SAPIENS	AGO1_HUMAN Protein argonaute-1
Hexim1	[453]		Q9UBQ5	1	1	5	0.62	0.0023	25059.9	HOMO SAPIENS	EIF3K_HUMAN Eukaryotic translation initiation factor 3 subunit K
Hexim1	[454]		Q9BTE3	1	1	1.6	0.62	0.0067	72980.8	HOMO SAPIENS	MCMBP_HUMAN Mini-chromosome maintenance complex-binding protein
Hexim1	[455]		P08243	1	1	2.3	0.61	0.009	64370.5	HOMO SAPIENS	ASNS_HUMAN Asparagine synthetase [glutamine-hydrolyzing]
Hexim1	[456]		P25788	1	1	7.8	0.6	0.0017	28433.5	HOMO SAPIENS	PSA3_HUMAN Proteasome subunit alpha type-3
Hexim1	[457]		Q7RTV0	1	1	14.5	0.59	0.0022	12405.6	HOMO SAPIENS	PHF5A_HUMAN PHD finger-like domain-containing protein 5A
Hexim1	[458]		Q13162	1	1	3.7	0.58	0.0045	30540.2	HOMO SAPIENS	PRDX4_HUMAN Peroxiredoxin-4
Hexim1	[459]		Q15021	1	1	1	0.57	0.0038	157184	HOMO SAPIENS	CND1_HUMAN Condensin complex subunit 1
Hexim1	[460]		Q15369	1	1	12.5	0.56	0.0015	12473.3	HOMO SAPIENS	ELOC_HUMAN Transcription elongation factor B polypeptide 1
Hexim1	[461]		Q01130	1	1	7.7	0.56	0.0027	25476.5	HOMO SAPIENS	SRSF2_HUMAN Serine/arginine-rich splicing factor 2
Hexim1	[462]		P33240	1	1	1.6	0.54	0.0031	60960.1	HOMO SAPIENS	CSTF2_HUMAN Cleavage stimulation factor subunit 2
Hexim1	[463]		Q2M389	1	1	0.9	0.53	0.0029	136405	HOMO SAPIENS	WASH7_HUMAN WASH complex subunit 7
Hexim1	[464]		Q01081	1	1	6.2	0.53	0.0025	27872.3	HOMO SAPIENS	U2AF1_HUMAN Splicing factor U2AF 35 kDa subunit
Hexim1	[464-1]	0	Q8WU68	1	1	6.8	0.53	0.0025	25743.9	HOMO SAPIENS	U2AF4_HUMAN Splicing factor U2AF 26 kDa subunit
Hexim1	[465]		Q8WV48	1	1	7.4	0.5	0.0023	30509.3	HOMO SAPIENS	CC107_HUMAN Coiled-coil domain-containing protein 107
Hexim1	[466]		Q9BZK3	1	1	7	0.5	0.0041	23306.2	HOMO SAPIENS	NACP1_HUMAN Putative nascent polypeptide-associated complex subunit alpha-like protein
Hexim1	[467]		O75643	1	1	0.6	0.5	0.0024	244510	HOMO SAPIENS	U520_HUMAN U5 small nuclear ribonucleoprotein 200 kDa helicase
Hexim1	[468]		P49736	1	1	1.3	0.47	0.0064	101897	HOMO SAPIENS	MCM2_HUMAN DNA replication licensing factor MCM2
Hexim1	[469]		Q8NFW8	1	1	2.8	0.47	0.0071	48379.7	HOMO SAPIENS	NEUA_HUMAN N-acylneuraminate cytidylyltransferase
Hexim1	[470]		P55060	1	1	1.8	0.46	0.0047	110418	HOMO SAPIENS	XPO2_HUMAN Exportin-2
Hexim1	[471]		Q9UBF2	1	1	1.5	0.46	0.0018	97623.2	HOMO SAPIENS	COPG2_HUMAN Coatomer subunit gamma-2
Hexim1	[472]		Q58FG0	1	1	3	0.44	0.00064	38738.3	HOMO SAPIENS	HS905_HUMAN Putative heat shock protein HSP 90-alpha A5
Hexim1	[473]		O75821	1	1	5	0.44	0.0093	35611.3	HOMO SAPIENS	EIF3G_HUMAN Eukaryotic translation initiation factor 3 subunit G
Hexim1	[474]		P62491	1	1	5.1	0.43	0.0039	24393.7	HOMO SAPIENS	RB11A_HUMAN Ras-related protein Rab-11A
Hexim1	[474-1]	0	Q15907	1	1	5	0.43	0.0039	24488.7	HOMO SAPIENS	RB11B_HUMAN Ras-related protein Rab-11B
Hexim1	[475]		Q53H96	1	1	4.7	0.42	0.002	28649.5	HOMO SAPIENS	P5CR3_HUMAN Pyrroline-5-carboxylate reductase 3
Hexim1	[476]		Q14157	1	1	1.4	0.42	0.003	114535	HOMO SAPIENS	UBP2L_HUMAN Ubiquitin-associated protein 2-like
Hexim1	[477]		P40937	1	1	2.9	0.39	0.0069	38496.9	HOMO SAPIENS	RFC5_HUMAN Replication factor C subunit 5
Hexim1	[478]		Q9HCE1	1	1	1	0.39	0.0032	113672	HOMO SAPIENS	MOV10_HUMAN Putative helicase MOV-10
Hexim1	[479]		decoy	1	1	0.6	0.38	0.0086	226296	HOMO SAPIENS	SCN3A_HUMAN Sodium channel protein type 3 subunit alpha
Hexim1	[480]		P13667	1	1	1.9	0.34	0.006	72933.1	HOMO SAPIENS	PDIA4_HUMAN Protein disulfide-isomerase A4
Hexim1	[481]		P22061	1	1	4	0.34	0.0067	24636.6	HOMO SAPIENS	PIMT_HUMAN Protein-L-isoaspartate(D-aspartate) O-methyltransferase
Hexim1	[482]		Q8N9T8	1	1	2.1	0.33	0.0055	83252.5	HOMO SAPIENS	KRI1_HUMAN Protein KRI1 homolog
Hexim1	[483]		Q9UBS4	1	1	4.5	0.31	0.0081	40514.3	HOMO SAPIENS	DJB11_HUMAN DnaJ homolog subfamily B member 11
Hexim1	[484]		O94906	1	1	1.3	0.29	0.0061	106926	HOMO SAPIENS	PRP6_HUMAN Pre-mRNA-processing factor 6
Hexim1	[485]		Q15648	1	1	0.8	0.28	0.0051	168480	HOMO SAPIENS	MED1_HUMAN Mediator of RNA polymerase II transcription subunit 1
Hexim1	[486]		P35659	1	1	3.5	0.27	0.0029	42674.6	HOMO SAPIENS	DEK_HUMAN Protein DEK
Hexim1	[487]		decoy	1	1	0.9	0.25	0.0039	131152	HOMO SAPIENS	DSPP_HUMAN Dentin sialophosphoprotein
Hexim1	[488]		Q9UI09	1	1	11.7	0.21	0.0028	17114.6	HOMO SAPIENS	NDUAC_HUMAN NADH dehydrogenase [ubiquinone] 1 alpha subcomplex subunit 12
Hexim1	[489]		P26640	1	1	0.9	0.21	0.0037	140477	HOMO SAPIENS	SYVC_HUMAN Valine--tRNA ligase
Hexim1	[490]		P00492	1	1	6	0.19	0.0044	24579.6	HOMO SAPIENS	HPRT_HUMAN Hypoxanthine-guanine phosphoribosyltransferase
Hexim1	[491]		P78316	1	1	1.3	0.19	0.0054	97669.2	HOMO SAPIENS	NOP14_HUMAN Nucleolar protein 14
Hexim1	[492]		Q8WZ42	1	1	0	0.18	0.0089	3.81617e+06	HOMO SAPIENS	TITIN_HUMAN Titin
Hexim1	[493]		P28799	1	1	2.2	0.18	0.0032	63545.3	HOMO SAPIENS	GRN_HUMAN Granulins
Hexim1	[494]		Q9NWU5	1	1	6.3	0.16	0.0075	23640.9	HOMO SAPIENS	RM22_HUMAN 39S ribosomal protein L22, mitochondrial
Hexim1	[495]		decoy	1	1	2.2	0.16	0.0063	47565.9	HOMO SAPIENS	ZN735_HUMAN Putative zinc finger protein 735
Hexim1	[496]		P01771	1	1	13.2	0.15	0.0074	13566.5	HOMO SAPIENS	HV310_HUMAN Ig heavy chain V-III region HIL
Hexim1	[497]		Q6P2E9	1	1	1.1	0.14	0.004	151662	HOMO SAPIENS	EDC4_HUMAN Enhancer of mRNA-decapping protein 4
Hexim1	[498]		P51784	1	1	1.2	0.14	0.007	109818	HOMO SAPIENS	UBP11_HUMAN Ubiquitin carboxyl-terminal hydrolase 11
Hexim1	[499]		Q8IXB1	1	1	2.1	0.13	0.0082	91080.5	HOMO SAPIENS	DJC10_HUMAN DnaJ homolog subfamily C member 10
Hexim1	[500]		Q9H649	1	1	4.7	0.13	0.0084	38244.8	HOMO SAPIENS	NSUN3_HUMAN Putative methyltransferase NSUN3
Hexim1	[501]		P33992	1	1	1.6	0.11	0.0075	82286.3	HOMO SAPIENS	MCM5_HUMAN DNA replication licensing factor MCM5
Hexim1	[502]		O14950	1	1	5.8	0.09	0.0099	19779.3	HOMO SAPIENS	ML12B_HUMAN Myosin regulatory light chain 12B
Hexim1	[502-1]	0	P19105	1	1	5.8	0.09	0.0099	19794.3	HOMO SAPIENS	ML12A_HUMAN Myosin regulatory light chain 12A
Hexim1	[502-2]	0	P24844	1	1	5.8	0.09	0.0099	19827.4	HOMO SAPIENS	MYL9_HUMAN Myosin regulatory light polypeptide 9
Hexim1	[503]		P25789	1	1	3.8	0.08	0.0077	29484.1	HOMO SAPIENS	PSA4_HUMAN Proteasome subunit alpha type-4
Hexim1	[504]		decoy	1	1	0.8	0.06	0.0071	84214.7	HOMO SAPIENS	POMT2_HUMAN Protein O-mannosyl-transferase 2

## Sheet: HEXIM1 #3
Bait	Rank	Uniq Pep	Acc #	Num Unique	Peptide Count	% Cov	Best Disc Score	Best Expect Val	Protein MW	Species	Protein Name
Hexim1	[1]		P11142	37	53	46.9	6.21	2.8e-10	70898.7	HOMO SAPIENS	HSP7C_HUMAN Heat shock cognate 71 kDa protein
Hexim1	[1-1]	28	P08107	32	53	47.9	5.49	8.8e-09	70052.8	HOMO SAPIENS	HSP71_HUMAN Heat shock 70 kDa protein 1A/1B
Hexim1	[1-2]	13	P34931	18	30	25.7	5.65	8.3e-09	70375.6	HOMO SAPIENS	HS71L_HUMAN Heat shock 70 kDa protein 1-like
Hexim1	[1-3]	11	P11021	13	18	28.3	5.68	7.1e-09	72333.5	HOMO SAPIENS	GRP78_HUMAN 78 kDa glucose-regulated protein
Hexim1	[1-4]	0	P54652	10	14	13.5	5.65	8.3e-09	70021.5	HOMO SAPIENS	HSP72_HUMAN Heat shock-related 70 kDa protein 2
Hexim1	[1-5]	2	P17066	5	10	8.1	5.49	8.8e-09	71028.7	HOMO SAPIENS	HSP76_HUMAN Heat shock 70 kDa protein 6
Hexim1	[1-6]	1	P48741	4	7	9.8	3.26	2.7e-06	40244.8	HOMO SAPIENS	HSP77_HUMAN Putative heat shock 70 kDa protein 7
Hexim1	[2]		P35527	37	67	68.2	6.7	1.2e-11	62064.8	HOMO SAPIENS	K1C9_HUMAN Keratin, type I cytoskeletal 9
Hexim1	[2-1]	22	P13645	23	31	43	6.33	3.9e-10	58827.5	HOMO SAPIENS	K1C10_HUMAN Keratin, type I cytoskeletal 10
Hexim1	[2-2]	19	P08779	20	26	46.5	5.32	2.1e-09	51268.3	HOMO SAPIENS	K1C16_HUMAN Keratin, type I cytoskeletal 16
Hexim1	[2-3]	20	P02533	21	28	49.4	4.07	1.9e-07	51561.9	HOMO SAPIENS	K1C14_HUMAN Keratin, type I cytoskeletal 14
Hexim1	[2-4]	9	Q04695	10	13	21.3	3.36	9.5e-07	48106.1	HOMO SAPIENS	K1C17_HUMAN Keratin, type I cytoskeletal 17
Hexim1	[2-5]	5	P19012	6	11	10.1	2.55	1.6e-05	49212.1	HOMO SAPIENS	K1C15_HUMAN Keratin, type I cytoskeletal 15
Hexim1	[2-6]	4	P08727	5	7	10.8	1.74	0.0017	44106.3	HOMO SAPIENS	K1C19_HUMAN Keratin, type I cytoskeletal 19
Hexim1	[3]		P04264	38	72	55	5.43	2e-09	66039.2	HOMO SAPIENS	K2C1_HUMAN Keratin, type II cytoskeletal 1
Hexim1	[3-1]	22	P35908	25	33	48.2	4.01	9.5e-07	65433.4	HOMO SAPIENS	K22E_HUMAN Keratin, type II cytoskeletal 2 epidermal
Hexim1	[3-2]	19	P13647	21	25	32.2	4.26	2.1e-07	62378.9	HOMO SAPIENS	K2C5_HUMAN Keratin, type II cytoskeletal 5
Hexim1	[3-3]	17	P02538	19	22	35.3	4.78	8.9e-09	60045.4	HOMO SAPIENS	K2C6A_HUMAN Keratin, type II cytoskeletal 6A
Hexim1	[3-4]	17	P48668	19	22	35.3	4.78	8.9e-09	60025.4	HOMO SAPIENS	K2C6C_HUMAN Keratin, type II cytoskeletal 6C
Hexim1	[3-5]	14	P04259	17	24	30.7	4.78	8.9e-09	60067.4	HOMO SAPIENS	K2C6B_HUMAN Keratin, type II cytoskeletal 6B
Hexim1	[3-6]	6	O95678	7	8	12.2	3.51	2e-05	59560.9	HOMO SAPIENS	K2C75_HUMAN Keratin, type II cytoskeletal 75
Hexim1	[3-7]	5	Q5XKE5	6	7	10.5	3.51	2e-05	57836.1	HOMO SAPIENS	K2C79_HUMAN Keratin, type II cytoskeletal 79
Hexim1	[3-8]	4	Q01546	5	5	6.9	2.4	4.6e-05	65841.3	HOMO SAPIENS	K22O_HUMAN Keratin, type II cytoskeletal 2 oral
Hexim1	[3-9]	2	P05787	5	5	7.7	2.47	4.1e-05	53704.7	HOMO SAPIENS	K2C8_HUMAN Keratin, type II cytoskeletal 8
Hexim1	[3-10]	1	Q7Z794	3	5	4.7	3.96	9.5e-07	61901.9	HOMO SAPIENS	K2C1B_HUMAN Keratin, type II cytoskeletal 1b
Hexim1	[3-11]	5	P12035	6	6	8.6	1.96	4.6e-05	64417.5	HOMO SAPIENS	K2C3_HUMAN Keratin, type II cytoskeletal 3
Hexim1	[3-12]	3	P19013	4	4	7.3	2.47	4.1e-05	57285.7	HOMO SAPIENS	K2C4_HUMAN Keratin, type II cytoskeletal 4
Hexim1	[3-13]	1	P08729	2	2	3.8	2.47	4.1e-05	51386.1	HOMO SAPIENS	K2C7_HUMAN Keratin, type II cytoskeletal 7
Hexim1	[3-14]	0	P14136	1	1	2.5	2.47	4.1e-05	49880.6	HOMO SAPIENS	GFAP_HUMAN Glial fibrillary acidic protein
Hexim1	[3-15]	0	Q6KB66	1	1	2.4	2.47	4.1e-05	50525.7	HOMO SAPIENS	K2C80_HUMAN Keratin, type II cytoskeletal 80
Hexim1	[4]		P38646	32	47	50.4	5.86	7.8e-09	73681.1	HOMO SAPIENS	GRP75_HUMAN Stress-70 protein, mitochondrial
Hexim1	[5]		O94992	29	89	75.5	5.88	5.9e-10	40623.8	HOMO SAPIENS	HEXI1_HUMAN Protein HEXIM1
Hexim1	[5-1]	2	Q96MH2	3	9	12.2	1.67	0.00084	32418.8	HOMO SAPIENS	HEXI2_HUMAN Protein HEXIM2
Hexim1	[6]		P23396	26	42	70.8	5.55	2.2e-09	26688.6	HOMO SAPIENS	RS3_HUMAN 40S ribosomal protein S3
Hexim1	[7]		P46777	21	42	47.5	4.53	1.1e-08	34362.9	HOMO SAPIENS	RL5_HUMAN 60S ribosomal protein L5
Hexim1	[8]		Q9C0C9	19	23	29.3	4.71	1.3e-08	141295	HOMO SAPIENS	UBE2O_HUMAN Ubiquitin-conjugating enzyme E2 O
Hexim1	[9]		P19784	16	21	50.6	5.38	4.3e-09	41213.6	HOMO SAPIENS	CSK22_HUMAN Casein kinase II subunit alpha'
Hexim1	[9-1]	16	P68400	17	23	48.8	4.05	1e-07	45144	HOMO SAPIENS	CSK21_HUMAN Casein kinase II subunit alpha
Hexim1	[10]		P07437	20	24	48.9	3.32	2.4e-06	49671.3	HOMO SAPIENS	TBB5_HUMAN Tubulin beta chain
Hexim1	[10-1]	3	P68371	19	22	46.1	3.4	1.6e-06	49831.5	HOMO SAPIENS	TBB4B_HUMAN Tubulin beta-4B chain
Hexim1	[10-2]	3	P04350	17	20	41.9	3.4	1.6e-06	49586.2	HOMO SAPIENS	TBB4A_HUMAN Tubulin beta-4A chain
Hexim1	[10-3]	1	Q13509	13	17	22	3.24	2.4e-06	50433.2	HOMO SAPIENS	TBB3_HUMAN Tubulin beta-3 chain
Hexim1	[10-4]	0	Q13885	13	15	30.8	3.13	2.4e-06	49907.4	HOMO SAPIENS	TBB2A_HUMAN Tubulin beta-2A chain
Hexim1	[10-5]	0	Q9BVA1	13	15	30.8	3.13	2.4e-06	49953.5	HOMO SAPIENS	TBB2B_HUMAN Tubulin beta-2B chain
Hexim1	[10-6]	2	Q3ZCM7	7	7	15.8	3.4	1.6e-06	49776.5	HOMO SAPIENS	TBB8_HUMAN Tubulin beta-8 chain
Hexim1	[10-7]	0	A6NNZ2	5	5	12.4	3.22	4.5e-06	49573.1	HOMO SAPIENS	TBB8B_HUMAN Tubulin beta-8 chain B
Hexim1	[10-8]	0	Q9BUF5	3	3	5.2	2	9.7e-05	49857.6	HOMO SAPIENS	TBB6_HUMAN Tubulin beta-6 chain
Hexim1	[10-9]	0	A6NKZ8	1	1	3.8	1.21	0.0021	41775.5	HOMO SAPIENS	YI016_HUMAN Putative tubulin beta chain-like protein ENSP00000290377
Hexim1	[11]		Q99733	12	15	31.2	5.3	1.3e-08	42823.8	HOMO SAPIENS	NP1L4_HUMAN Nucleosome assembly protein 1-like 4
Hexim1	[12]		P46782	12	18	53.9	5.4	1e-08	22876.6	HOMO SAPIENS	RS5_HUMAN 40S ribosomal protein S5
Hexim1	[13]		P61247	11	15	45.1	6.07	1e-09	29945.2	HOMO SAPIENS	RS3A_HUMAN 40S ribosomal protein S3a
Hexim1	[14]		P78371	12	16	33.5	4.89	3e-07	57488.7	HOMO SAPIENS	TCPB_HUMAN T-complex protein 1 subunit beta
Hexim1	[15]		P67870	13	15	51.2	4.71	4e-08	24942.7	HOMO SAPIENS	CSK2B_HUMAN Casein kinase II subunit beta
Hexim1	[16]		P06576	13	14	40.1	4.95	1.3e-08	56560.4	HOMO SAPIENS	ATPB_HUMAN ATP synthase subunit beta, mitochondrial
Hexim1	[17]		P25398	8	15	54.5	7.28	2.1e-11	14515.1	HOMO SAPIENS	RS12_HUMAN 40S ribosomal protein S12
Hexim1	[18]		P68363	11	13	37.9	4.62	5.1e-08	50152.1	HOMO SAPIENS	TBA1B_HUMAN Tubulin alpha-1B chain
Hexim1	[18-1]	2	Q9BQE3	10	12	39	4.62	5.1e-08	49895.8	HOMO SAPIENS	TBA1C_HUMAN Tubulin alpha-1C chain
Hexim1	[18-2]	0	P68366	9	10	30.4	4.58	5.1e-08	49924.9	HOMO SAPIENS	TBA4A_HUMAN Tubulin alpha-4A chain
Hexim1	[18-3]	0	Q71U36	8	9	31.9	4.62	5.1e-08	50136.1	HOMO SAPIENS	TBA1A_HUMAN Tubulin alpha-1A chain
Hexim1	[18-4]	0	Q13748	6	7	26.7	4.44	5.1e-08	49960	HOMO SAPIENS	TBA3C_HUMAN Tubulin alpha-3C/D chain
Hexim1	[18-5]	0	Q6PEY2	5	6	22	4.44	5.1e-08	49859	HOMO SAPIENS	TBA3E_HUMAN Tubulin alpha-3E chain
Hexim1	[18-6]	0	Q9NY65	4	5	16.5	4.58	5.1e-08	50094	HOMO SAPIENS	TBA8_HUMAN Tubulin alpha-8 chain
Hexim1	[18-7]	0	Q9H853	1	2	5.8	4.15	6.9e-07	27551.5	HOMO SAPIENS	TBA4B_HUMAN Putative tubulin-like protein alpha-4B
Hexim1	[18-8]	0	A6NHL2	1	1	2	1.14	0.00071	49909.2	HOMO SAPIENS	TBAL3_HUMAN Tubulin alpha chain-like 3
Hexim1	[19]		P17987	11	14	25.7	4.8	9.1e-08	60344.1	HOMO SAPIENS	TCPA_HUMAN T-complex protein 1 subunit alpha
Hexim1	[20]		Q07021	9	63	42.9	5.22	1.4e-08	31362.5	HOMO SAPIENS	C1QBP_HUMAN Complement component 1 Q subcomponent-binding protein, mitochondrial
Hexim1	[21]		P49368	21	26	36.1	2.5	3e-05	60534.5	HOMO SAPIENS	TCPG_HUMAN T-complex protein 1 subunit gamma
Hexim1	[22]		Q00839	9	12	17.2	5.68	3.2e-09	90585.2	HOMO SAPIENS	HNRPU_HUMAN Heterogeneous nuclear ribonucleoprotein U
Hexim1	[23]		P25705	10	12	24.2	4.53	2.4e-07	59751.1	HOMO SAPIENS	ATPA_HUMAN ATP synthase subunit alpha, mitochondrial
Hexim1	[24]		P39019	11	17	47.6	4.35	1.7e-07	16060.6	HOMO SAPIENS	RS19_HUMAN 40S ribosomal protein S19
Hexim1	[25]		P06748	7	12	22.4	6.34	2.9e-10	32575.3	HOMO SAPIENS	NPM_HUMAN Nucleophosmin
Hexim1	[26]		Q9HD40	12	15	32.1	3.4	3.9e-06	55726.8	HOMO SAPIENS	SPCS_HUMAN O-phosphoseryl-tRNA(Sec) selenium transferase
Hexim1	[27]		P15880	10	15	30.4	3.38	2.5e-06	31324.7	HOMO SAPIENS	RS2_HUMAN 40S ribosomal protein S2
Hexim1	[28]		P63261	7	7	33.6	5.98	1.2e-09	41793.2	HOMO SAPIENS	ACTG_HUMAN Actin, cytoplasmic 2
Hexim1	[28-1]	1	P60709	7	7	33.6	3.26	3.8e-07	41737.1	HOMO SAPIENS	ACTB_HUMAN Actin, cytoplasmic 1
Hexim1	[28-2]	0	Q6S8J3	3	3	4.6	2.24	4.2e-05	121365	HOMO SAPIENS	POTEE_HUMAN POTE ankyrin domain family member E
Hexim1	[28-3]	0	P62736	3	3	9.8	2.24	4.2e-05	42009.4	HOMO SAPIENS	ACTA_HUMAN Actin, aortic smooth muscle
Hexim1	[28-4]	0	P63267	3	3	9.8	2.24	4.2e-05	41877.3	HOMO SAPIENS	ACTH_HUMAN Actin, gamma-enteric smooth muscle
Hexim1	[28-5]	0	P68032	3	3	9.8	2.24	4.2e-05	42019.4	HOMO SAPIENS	ACTC_HUMAN Actin, alpha cardiac muscle 1
Hexim1	[28-6]	0	P68133	3	3	9.8	2.24	4.2e-05	42051.4	HOMO SAPIENS	ACTS_HUMAN Actin, alpha skeletal muscle
Hexim1	[28-7]	0	A5A3E0	2	2	2.4	2.24	4.2e-05	121446	HOMO SAPIENS	POTEF_HUMAN POTE ankyrin domain family member F
Hexim1	[28-8]	0	Q562R1	2	2	7.2	2.24	4.2e-05	42003.6	HOMO SAPIENS	ACTBL_HUMAN Beta-actin-like protein 2
Hexim1	[28-9]	0	Q9BYX7	1	1	4.3	2.24	4.2e-05	42016.6	HOMO SAPIENS	ACTBM_HUMAN Putative beta-actin-like protein 3
Hexim1	[28-10]	0	P0CG38	1	1	0.9	1.27	0.0024	121284	HOMO SAPIENS	POTEI_HUMAN POTE ankyrin domain family member I
Hexim1	[28-11]	0	P0CG39	1	1	1	1.27	0.0024	117391	HOMO SAPIENS	POTEJ_HUMAN POTE ankyrin domain family member J
Hexim1	[29]		Q92598	11	12	18.5	3.56	9.7e-07	96865.8	HOMO SAPIENS	HS105_HUMAN Heat shock protein 105 kDa
Hexim1	[29-1]	6	P34932	7	8	11.4	3.61	6.9e-07	94331.8	HOMO SAPIENS	HSP74_HUMAN Heat shock 70 kDa protein 4
Hexim1	[29-2]	2	O95757	4	5	6.3	3.56	9.7e-07	94513.3	HOMO SAPIENS	HS74L_HUMAN Heat shock 70 kDa protein 4L
Hexim1	[30]		P48643	10	11	25.5	3.35	1.1e-05	59671.6	HOMO SAPIENS	TCPE_HUMAN T-complex protein 1 subunit epsilon
Hexim1	[31]		P67809	7	9	51.9	4.61	5.8e-08	35924.5	HOMO SAPIENS	YBOX1_HUMAN Nuclease-sensitive element-binding protein 1
Hexim1	[32]		P19338	11	15	21.8	3.35	2.1e-06	76615	HOMO SAPIENS	NUCL_HUMAN Nucleolin
Hexim1	[33]		P40227	11	13	29	3.25	5e-06	58024.7	HOMO SAPIENS	TCPZ_HUMAN T-complex protein 1 subunit zeta
Hexim1	[33-1]	0	Q92526	2	2	2.5	0.52	0.0029	57822	HOMO SAPIENS	TCPW_HUMAN T-complex protein 1 subunit zeta-2
Hexim1	[34]		P78347	12	13	17.8	3.02	1.9e-06	112417	HOMO SAPIENS	GTF2I_HUMAN General transcription factor II-I
Hexim1	[35]		O00411	11	12	16.4	3.06	1.3e-05	138622	HOMO SAPIENS	RPOM_HUMAN DNA-directed RNA polymerase, mitochondrial
Hexim1	[36]		P08865	5	5	27.1	6.45	8e-10	32854.4	HOMO SAPIENS	RSSA_HUMAN 40S ribosomal protein SA
Hexim1	[37]		P10809	11	11	27.6	2.62	8.2e-05	61055.2	HOMO SAPIENS	CH60_HUMAN 60 kDa heat shock protein, mitochondrial
Hexim1	[38]		P50991	9	9	27.8	3.41	1.2e-06	57924.8	HOMO SAPIENS	TCPD_HUMAN T-complex protein 1 subunit delta
Hexim1	[39]		P05455	8	9	23	4.02	7.9e-08	46837.4	HOMO SAPIENS	LA_HUMAN Lupus La protein
Hexim1	[40]		P26641	7	8	16	4.18	1.3e-06	50119.2	HOMO SAPIENS	EF1G_HUMAN Elongation factor 1-gamma
Hexim1	[41]		P62829	8	10	47.1	4.89	1.3e-09	14865.6	HOMO SAPIENS	RL23_HUMAN 60S ribosomal protein L23
Hexim1	[42]		P08238	9	9	18.2	3.23	7.7e-06	83264.9	HOMO SAPIENS	HS90B_HUMAN Heat shock protein HSP 90-beta
Hexim1	[42-1]	3	P07900	7	7	11.5	3.37	3.3e-06	84660.4	HOMO SAPIENS	HS90A_HUMAN Heat shock protein HSP 90-alpha
Hexim1	[42-2]	0	Q58FF8	3	3	8.1	1.23	0.0015	44349.3	HOMO SAPIENS	H90B2_HUMAN Putative heat shock protein HSP 90-beta 2
Hexim1	[42-3]	0	Q12931	1	1	2	3.23	7.7e-06	80110.7	HOMO SAPIENS	TRAP1_HUMAN Heat shock protein 75 kDa, mitochondrial
Hexim1	[42-4]	0	Q58FG1	1	1	3.1	2.62	1.2e-05	47712.3	HOMO SAPIENS	HS904_HUMAN Putative heat shock protein HSP 90-alpha A4
Hexim1	[42-5]	0	Q14568	2	2	6.1	1.23	0.0015	39365.1	HOMO SAPIENS	HS902_HUMAN Putative heat shock protein HSP 90-alpha A2
Hexim1	[43]		P50990	7	8	17.3	3.96	1.7e-06	59621.1	HOMO SAPIENS	TCPQ_HUMAN T-complex protein 1 subunit theta
Hexim1	[44]		O60563	8	10	19.7	4.69	4.2e-09	80685.3	HOMO SAPIENS	CCNT1_HUMAN Cyclin-T1
Hexim1	[45]		P50750	6	7	16.4	4.62	5.5e-08	42777.9	HOMO SAPIENS	CDK9_HUMAN Cyclin-dependent kinase 9
Hexim1	[46]		Q9BY77	7	8	26.8	3.52	8.9e-07	46089.7	HOMO SAPIENS	PDIP3_HUMAN Polymerase delta-interacting protein 3
Hexim1	[47]		P68104	8	12	22.7	3.5	1.5e-06	50141.3	HOMO SAPIENS	EF1A1_HUMAN Elongation factor 1-alpha 1
Hexim1	[47-1]	0	Q5VTE0	8	12	22.7	3.5	1.5e-06	50185.5	HOMO SAPIENS	EF1A3_HUMAN Putative elongation factor 1-alpha-like 3
Hexim1	[47-2]	0	Q05639	5	6	11.4	2.04	0.0001	50470.6	HOMO SAPIENS	EF1A2_HUMAN Elongation factor 1-alpha 2
Hexim1	[48]		P62241	6	10	35.1	4.04	2.5e-06	24205.4	HOMO SAPIENS	RS8_HUMAN 40S ribosomal protein S8
Hexim1	[49]		P29692	6	7	27.4	4.3	4e-07	31122.1	HOMO SAPIENS	EF1D_HUMAN Elongation factor 1-delta
Hexim1	[50]		P62913	6	6	31.5	4.51	6.8e-08	20252.6	HOMO SAPIENS	RL11_HUMAN 60S ribosomal protein L11
Hexim1	[51]		P82933	6	7	22.5	4.2	2.7e-08	45835.2	HOMO SAPIENS	RT09_HUMAN 28S ribosomal protein S9, mitochondrial
Hexim1	[52]		P62753	6	7	27.7	3.88	3e-06	28680.9	HOMO SAPIENS	RS6_HUMAN 40S ribosomal protein S6
Hexim1	[53]		Q08211	8	9	8.7	2.76	3.4e-05	140960	HOMO SAPIENS	DHX9_HUMAN ATP-dependent RNA helicase A
Hexim1	[54]		Q93008	6	6	3.4	3.59	2.4e-06	292282	HOMO SAPIENS	USP9X_HUMAN Probable ubiquitin carboxyl-terminal hydrolase FAF-X
Hexim1	[54-1]	1	O00507	2	2	0.9	2.76	6.8e-06	291080	HOMO SAPIENS	USP9Y_HUMAN Probable ubiquitin carboxyl-terminal hydrolase FAF-Y
Hexim1	[55]		P08708	4	8	37.8	5.88	2.9e-10	15550.3	HOMO SAPIENS	RS17_HUMAN 40S ribosomal protein S17
Hexim1	[55-1]	0	P0CW22	4	8	37.8	5.88	2.9e-10	15550.3	HOMO SAPIENS	RS17L_HUMAN 40S ribosomal protein S17-like
Hexim1	[56]		P62249	9	17	52.1	2.82	1.6e-06	16445.5	HOMO SAPIENS	RS16_HUMAN 40S ribosomal protein S16
Hexim1	[57]		P37108	4	7	38.2	5.12	1.9e-07	14570.1	HOMO SAPIENS	SRP14_HUMAN Signal recognition particle 14 kDa protein
Hexim1	[58]		P23528	4	5	36.7	4.59	3.9e-07	18502.7	HOMO SAPIENS	COF1_HUMAN Cofilin-1
Hexim1	[59]		P62263	7	12	41.1	2.76	9.9e-06	16272.9	HOMO SAPIENS	RS14_HUMAN 40S ribosomal protein S14
Hexim1	[60]		P62701	7	7	28.1	2.69	1.3e-05	29598	HOMO SAPIENS	RS4X_HUMAN 40S ribosomal protein S4, X isoform
Hexim1	[60-1]	0	P22090	2	2	8	2.1	2.2e-05	29455.9	HOMO SAPIENS	RS4Y1_HUMAN 40S ribosomal protein S4, Y isoform 1
Hexim1	[60-2]	0	Q8TD47	2	2	7.6	2.1	2.2e-05	29295.7	HOMO SAPIENS	RS4Y2_HUMAN 40S ribosomal protein S4, Y isoform 2
Hexim1	[61]		P62269	5	6	36.2	2.95	0.00012	17718.8	HOMO SAPIENS	RS18_HUMAN 40S ribosomal protein S18
Hexim1	[62]		O60506	5	6	7.7	2.97	4.9e-06	69603.2	HOMO SAPIENS	HNRPQ_HUMAN Heterogeneous nuclear ribonucleoprotein Q
Hexim1	[62-1]	2	O43390	5	5	7.3	2.24	1.2e-05	70943.6	HOMO SAPIENS	HNRPR_HUMAN Heterogeneous nuclear ribonucleoprotein R
Hexim1	[63]		O60583	4	4	9.9	5.01	2e-08	81029.6	HOMO SAPIENS	CCNT2_HUMAN Cyclin-T2
Hexim1	[64]		P21333	6	6	5	2.99	5.1e-06	280741	HOMO SAPIENS	FLNA_HUMAN Filamin-A
Hexim1	[65]		Q86V81	4	4	20.6	4.66	2e-08	26888.1	HOMO SAPIENS	THOC4_HUMAN THO complex subunit 4
Hexim1	[66]		P55209	4	4	16.9	4.14	4.9e-07	45374.5	HOMO SAPIENS	NP1L1_HUMAN Nucleosome assembly protein 1-like 1
Hexim1	[67]		P55072	4	4	6.7	4.12	1.2e-06	89322.6	HOMO SAPIENS	TERA_HUMAN Transitional endoplasmic reticulum ATPase
Hexim1	[68]		P11940	5	5	9.9	3.32	1.2e-06	70671.5	HOMO SAPIENS	PABP1_HUMAN Polyadenylate-binding protein 1
Hexim1	[68-1]	0	Q13310	2	2	4.3	3.29	1.2e-06	70783.5	HOMO SAPIENS	PABP4_HUMAN Polyadenylate-binding protein 4
Hexim1	[68-2]	0	Q9H361	1	1	2.2	2.23	0.00087	70031.5	HOMO SAPIENS	PABP3_HUMAN Polyadenylate-binding protein 3
Hexim1	[68-3]	0	Q4VXU2	1	1	1.5	0.79	0.0024	68392.9	HOMO SAPIENS	PAP1L_HUMAN Polyadenylate-binding protein 1-like
Hexim1	[69]		Q9H3K6	6	8	67.4	3.43	4.8e-07	10116.6	HOMO SAPIENS	BOLA2_HUMAN BolA-like protein 2
Hexim1	[70]		P62081	5	6	29.9	3.02	1.3e-05	22127	HOMO SAPIENS	RS7_HUMAN 40S ribosomal protein S7
Hexim1	[71]		P46781	4	4	22.2	4.33	9.6e-08	22591.6	HOMO SAPIENS	RS9_HUMAN 40S ribosomal protein S9
Hexim1	[72]		P05387	3	4	47.8	5.34	1.5e-09	11665	HOMO SAPIENS	RLA2_HUMAN 60S acidic ribosomal protein P2
Hexim1	[73]		Q99832	7	7	14	2.14	2.8e-05	59367.2	HOMO SAPIENS	TCPH_HUMAN T-complex protein 1 subunit eta
Hexim1	[74]		P52815	4	6	25.8	3.42	1.2e-06	21348.4	HOMO SAPIENS	RM12_HUMAN 39S ribosomal protein L12, mitochondrial
Hexim1	[75]		P27635	4	4	17.8	2.96	1.3e-05	24604.1	HOMO SAPIENS	RL10_HUMAN 60S ribosomal protein L10
Hexim1	[76]		P30050	5	5	33.3	2.34	0.00074	17818.7	HOMO SAPIENS	RL12_HUMAN 60S ribosomal protein L12
Hexim1	[77]		Q15366	5	5	24.7	2.51	3.4e-05	38580.4	HOMO SAPIENS	PCBP2_HUMAN Poly(rC)-binding protein 2
Hexim1	[77-1]	2	Q15365	4	5	19.1	3.03	1.4e-06	37498.2	HOMO SAPIENS	PCBP1_HUMAN Poly(rC)-binding protein 1
Hexim1	[77-2]	0	P57721	3	3	12.1	2.51	3.4e-05	39465.6	HOMO SAPIENS	PCBP3_HUMAN Poly(rC)-binding protein 3
Hexim1	[78]		P60900	3	3	15.9	3.6	4.1e-06	27399.7	HOMO SAPIENS	PSA6_HUMAN Proteasome subunit alpha type-6
Hexim1	[79]		O43175	4	4	11.4	3.56	3.3e-07	56651	HOMO SAPIENS	SERA_HUMAN D-3-phosphoglycerate dehydrogenase
Hexim1	[80]		Q13263	4	4	11.5	2.86	2.3e-05	88550.5	HOMO SAPIENS	TIF1B_HUMAN Transcription intermediary factor 1-beta
Hexim1	[81]		P46783	3	4	18.8	4.1	8.8e-07	18897.9	HOMO SAPIENS	RS10_HUMAN 40S ribosomal protein S10
Hexim1	[81-1]	0	Q9NQ39	1	2	8.5	4.1	8.8e-07	20120.5	HOMO SAPIENS	RS10L_HUMAN Putative 40S ribosomal protein S10-like
Hexim1	[82]		P35998	3	3	10.9	3.49	1.5e-06	48634.3	HOMO SAPIENS	PRS7_HUMAN 26S protease regulatory subunit 7
Hexim1	[83]		Q8NC51	2	2	9.1	5.41	7.6e-09	44965.7	HOMO SAPIENS	PAIRB_HUMAN Plasminogen activator inhibitor 1 RNA-binding protein
Hexim1	[84]		P84090	2	2	27.9	5.28	1.1e-08	12259.1	HOMO SAPIENS	ERH_HUMAN Enhancer of rudimentary homolog
Hexim1	[85]		Q12906	5	5	10.7	2.08	0.0004	95339.2	HOMO SAPIENS	ILF3_HUMAN Interleukin enhancer-binding factor 3
Hexim1	[86]		P84098	2	3	13.3	5.46	1.4e-08	23466.2	HOMO SAPIENS	RL19_HUMAN 60S ribosomal protein L19
Hexim1	[87]		P62937	4	4	31.5	2.8	1.7e-05	18012.7	HOMO SAPIENS	PPIA_HUMAN Peptidyl-prolyl cis-trans isomerase A
Hexim1	[87-1]	0	Q9Y536	1	1	8.5	1.03	0.00078	18182	HOMO SAPIENS	PAL4A_HUMAN Peptidyl-prolyl cis-trans isomerase A-like 4A/B/C
Hexim1	[88]		P06454	2	3	16.2	4.86	1.8e-08	12203	HOMO SAPIENS	PTMA_HUMAN Prothymosin alpha
Hexim1	[89]		P35637	4	4	8.9	2.76	5e-06	53426.2	HOMO SAPIENS	FUS_HUMAN RNA-binding protein FUS
Hexim1	[90]		P62266	4	4	40.6	2.9	5.1e-06	15807.7	HOMO SAPIENS	RS23_HUMAN 40S ribosomal protein S23
Hexim1	[91]		Q7L2E3	6	6	7.6	1.55	0.002	133939	HOMO SAPIENS	DHX30_HUMAN Putative ATP-dependent RNA helicase DHX30
Hexim1	[92]		P07814	4	4	4.8	2.97	3.2e-06	170592	HOMO SAPIENS	SYEP_HUMAN Bifunctional glutamate/proline--tRNA ligase
Hexim1	[93]		P49458	4	5	46.5	2.41	7.1e-06	10111.8	HOMO SAPIENS	SRP09_HUMAN Signal recognition particle 9 kDa protein
Hexim1	[94]		P24534	2	2	20	4.91	2.7e-08	24763.9	HOMO SAPIENS	EF1B_HUMAN Elongation factor 1-beta
Hexim1	[95]		P13646	4	8	6.6	2.55	1.6e-05	49588.6	HOMO SAPIENS	K1C13_HUMAN Keratin, type I cytoskeletal 13
Hexim1	[95-1]	2	Q7Z3Y7	3	4	3.4	2.01	0.00056	50567.8	HOMO SAPIENS	K1C28_HUMAN Keratin, type I cytoskeletal 28
Hexim1	[95-2]	0	P35900	2	3	2.6	1.17	0.0017	48487	HOMO SAPIENS	K1C20_HUMAN Keratin, type I cytoskeletal 20
Hexim1	[95-3]	0	O76013	1	2	1.5	0.71	0.0046	52247.6	HOMO SAPIENS	KRT36_HUMAN Keratin, type I cuticular Ha6
Hexim1	[95-4]	0	O76014	1	2	1.6	0.71	0.0046	49747.6	HOMO SAPIENS	KRT37_HUMAN Keratin, type I cuticular Ha7
Hexim1	[95-5]	0	O76015	1	2	1.5	0.71	0.0046	50480.5	HOMO SAPIENS	KRT38_HUMAN Keratin, type I cuticular Ha8
Hexim1	[95-6]	0	P05783	1	2	1.6	0.71	0.0046	48058.2	HOMO SAPIENS	K1C18_HUMAN Keratin, type I cytoskeletal 18
Hexim1	[95-7]	0	Q14525	1	2	1.7	0.71	0.0046	46214.1	HOMO SAPIENS	KT33B_HUMAN Keratin, type I cuticular Ha3-II
Hexim1	[95-8]	0	Q14532	1	2	1.6	0.71	0.0046	50343.5	HOMO SAPIENS	K1H2_HUMAN Keratin, type I cuticular Ha2
Hexim1	[95-9]	0	Q15323	1	2	1.7	0.71	0.0046	47237.5	HOMO SAPIENS	K1H1_HUMAN Keratin, type I cuticular Ha1
Hexim1	[95-10]	0	Q2M2I5	1	2	1.3	0.71	0.0046	55087.9	HOMO SAPIENS	K1C24_HUMAN Keratin, type I cytoskeletal 24
Hexim1	[95-11]	0	Q92764	1	2	1.5	0.71	0.0046	50361.2	HOMO SAPIENS	KRT35_HUMAN Keratin, type I cuticular Ha5
Hexim1	[95-12]	0	Q8N1A0	1	1	3.1	0.59	0.0017	34158.1	HOMO SAPIENS	KT222_HUMAN Keratin-like protein KRT222
Hexim1	[96]		Q07065	3	3	9.5	3.16	6.2e-06	66023	HOMO SAPIENS	CKAP4_HUMAN Cytoskeleton-associated protein 4
Hexim1	[97]		O75947	4	4	39.1	2.27	1.9e-05	18491.4	HOMO SAPIENS	ATP5H_HUMAN ATP synthase subunit d, mitochondrial
Hexim1	[98]		P62847	2	2	20.3	3.93	7.5e-08	15423.3	HOMO SAPIENS	RS24_HUMAN 40S ribosomal protein S24
Hexim1	[99]		Q15020	3	3	5.3	2.91	5.2e-05	109936	HOMO SAPIENS	SART3_HUMAN Squamous cell carcinoma antigen recognized by T-cells 3
Hexim1	[100]		P82912	2	2	16.5	4.36	6.6e-08	20615.9	HOMO SAPIENS	RT11_HUMAN 28S ribosomal protein S11, mitochondrial
Hexim1	[101]		Q9H0D6	3	3	6.8	3.07	9.9e-07	108583	HOMO SAPIENS	XRN2_HUMAN 5'-3' exoribonuclease 2
Hexim1	[102]		Q96B23	3	3	10.2	2.96	6.3e-07	43324.3	HOMO SAPIENS	CR025_HUMAN Uncharacterized protein C18orf25
Hexim1	[103]		P63220	3	4	51.8	2.27	8.6e-05	9111.5	HOMO SAPIENS	RS21_HUMAN 40S ribosomal protein S21
Hexim1	[104]		O95347	3	3	3.3	2.39	5.8e-05	135657	HOMO SAPIENS	SMC2_HUMAN Structural maintenance of chromosomes protein 2
Hexim1	[105]		P35268	2	3	21.9	3.67	3.5e-07	14787.1	HOMO SAPIENS	RL22_HUMAN 60S ribosomal protein L22
Hexim1	[106]		P55036	2	2	7.7	4.07	2.5e-07	40737	HOMO SAPIENS	PSMD4_HUMAN 26S proteasome non-ATPase regulatory subunit 4
Hexim1	[107]		Q92945	4	4	8	1.76	0.00026	73115.9	HOMO SAPIENS	FUBP2_HUMAN Far upstream element-binding protein 2
Hexim1	[108]		P63208	2	2	22.7	3.9	3.8e-07	18658.2	HOMO SAPIENS	SKP1_HUMAN S-phase kinase-associated protein 1
Hexim1	[109]		Q9BUJ2	4	4	9.1	1.91	0.00018	95739.3	HOMO SAPIENS	HNRL1_HUMAN Heterogeneous nuclear ribonucleoprotein U-like protein 1
Hexim1	[110]		P31943	2	2	7.6	3.21	2.1e-06	49229.9	HOMO SAPIENS	HNRH1_HUMAN Heterogeneous nuclear ribonucleoprotein H
Hexim1	[110-1]	0	P55795	1	1	3.8	3.21	2.1e-06	49264	HOMO SAPIENS	HNRH2_HUMAN Heterogeneous nuclear ribonucleoprotein H2
Hexim1	[110-2]	0	P52597	1	1	4.1	1.78	5.5e-05	45672.3	HOMO SAPIENS	HNRPF_HUMAN Heterogeneous nuclear ribonucleoprotein F
Hexim1	[111]		Q86YP4	4	4	7.7	1.73	0.0011	68063.3	HOMO SAPIENS	P66A_HUMAN Transcriptional repressor p66-alpha
Hexim1	[111-1]	0	Q8WXI9	1	1	1.9	1.73	0.0011	65261.3	HOMO SAPIENS	P66B_HUMAN Transcriptional repressor p66-beta
Hexim1	[112]		Q5SSJ5	2	2	6.5	3.57	1.4e-07	61207.5	HOMO SAPIENS	HP1B3_HUMAN Heterochromatin protein 1-binding protein 3
Hexim1	[113]		P62857	3	4	46.4	2.08	0.00014	7841.1	HOMO SAPIENS	RS28_HUMAN 40S ribosomal protein S28
Hexim1	[114]		Q7L2J0	3	3	11	1.98	0.0049	74355.8	HOMO SAPIENS	MEPCE_HUMAN 7SK snRNA methylphosphate capping enzyme
Hexim1	[115]		P15924	3	3	1.4	2.53	1.3e-05	331777	HOMO SAPIENS	DESP_HUMAN Desmoplakin
Hexim1	[116]		P04908	2	3	21.5	3.44	1.9e-06	14135.6	HOMO SAPIENS	H2A1B_HUMAN Histone H2A type 1-B/E
Hexim1	[116-1]	0	P0C0S8	2	3	21.5	3.44	1.9e-06	14091.6	HOMO SAPIENS	H2A1_HUMAN Histone H2A type 1
Hexim1	[116-2]	0	P20671	2	3	21.5	3.44	1.9e-06	14107.6	HOMO SAPIENS	H2A1D_HUMAN Histone H2A type 1-D
Hexim1	[116-3]	0	Q16777	2	3	21.7	3.44	1.9e-06	13988.5	HOMO SAPIENS	H2A2C_HUMAN Histone H2A type 2-C
Hexim1	[116-4]	0	Q6FI13	2	3	21.5	3.44	1.9e-06	14095.6	HOMO SAPIENS	H2A2A_HUMAN Histone H2A type 2-A
Hexim1	[116-5]	0	Q7L7L0	2	3	21.5	3.44	1.9e-06	14121.6	HOMO SAPIENS	H2A3_HUMAN Histone H2A type 3
Hexim1	[116-6]	0	Q93077	2	3	21.5	3.44	1.9e-06	14105.6	HOMO SAPIENS	H2A1C_HUMAN Histone H2A type 1-C
Hexim1	[116-7]	0	Q96KK5	2	3	21.9	3.44	1.9e-06	13906.4	HOMO SAPIENS	H2A1H_HUMAN Histone H2A type 1-H
Hexim1	[116-8]	0	Q99878	2	3	21.9	3.44	1.9e-06	13936.4	HOMO SAPIENS	H2A1J_HUMAN Histone H2A type 1-J
Hexim1	[116-9]	0	Q9BTM1	2	3	21.7	3.44	1.9e-06	14019.5	HOMO SAPIENS	H2AJ_HUMAN Histone H2A.J
Hexim1	[117]		P04406	3	3	15.8	2.62	2.2e-06	36053.5	HOMO SAPIENS	G3P_HUMAN Glyceraldehyde-3-phosphate dehydrogenase
Hexim1	[118]		Q9NZI8	2	2	4.7	2.6	6.1e-05	63481.1	HOMO SAPIENS	IF2B1_HUMAN Insulin-like growth factor 2 mRNA-binding protein 1
Hexim1	[119]		P62280	2	3	14.6	2.85	2.1e-05	18430.9	HOMO SAPIENS	RS11_HUMAN 40S ribosomal protein S11
Hexim1	[120]		Q14103	2	2	6.8	2.61	4.3e-05	38434.5	HOMO SAPIENS	HNRPD_HUMAN Heterogeneous nuclear ribonucleoprotein D0
Hexim1	[120-1]	1	Q99729	2	2	5.4	1.54	0.00015	36225.2	HOMO SAPIENS	ROAA_HUMAN Heterogeneous nuclear ribonucleoprotein A/B
Hexim1	[120-2]	0	O14979	1	1	2.4	1.54	0.00015	46437.9	HOMO SAPIENS	HNRDL_HUMAN Heterogeneous nuclear ribonucleoprotein D-like
Hexim1	[121]		P62851	2	2	18.4	3.04	1.7e-06	13742.2	HOMO SAPIENS	RS25_HUMAN 40S ribosomal protein S25
Hexim1	[122]		Q00610	3	3	2	1.94	0.00011	191616	HOMO SAPIENS	CLH1_HUMAN Clathrin heavy chain 1
Hexim1	[123]		Q4G0J3	2	2	4.6	2.44	0.00016	66899.2	HOMO SAPIENS	LARP7_HUMAN La-related protein 7
Hexim1	[124]		O75607	1	2	9.6	4.7	1.2e-07	19343.9	HOMO SAPIENS	NPM3_HUMAN Nucleoplasmin-3
Hexim1	[125]		P62318	2	2	31	2.32	0.00061	13916.4	HOMO SAPIENS	SMD3_HUMAN Small nuclear ribonucleoprotein Sm D3
Hexim1	[126]		P62750	3	3	16.7	2.15	2.6e-05	17695.2	HOMO SAPIENS	RL23A_HUMAN 60S ribosomal protein L23a
Hexim1	[127]		Q15233	3	3	8.9	2.41	1.2e-05	54232	HOMO SAPIENS	NONO_HUMAN Non-POU domain-containing octamer-binding protein
Hexim1	[128]		Q15046	1	1	2.8	4.54	1.1e-07	68048.7	HOMO SAPIENS	SYK_HUMAN Lysine--tRNA ligase
Hexim1	[129]		P46776	3	4	17.6	1.81	0.00034	16561.5	HOMO SAPIENS	RL27A_HUMAN 60S ribosomal protein L27a
Hexim1	[130]		P01614	1	1	11.3	4.48	2.5e-08	12676.4	HOMO SAPIENS	KV201_HUMAN Ig kappa chain V-II region Cum
Hexim1	[130-1]	0	P01617	1	1	11.5	4.48	2.5e-08	12317	HOMO SAPIENS	KV204_HUMAN Ig kappa chain V-II region TEW
Hexim1	[130-2]	0	P06309	1	1	11.1	4.48	2.5e-08	12664.3	HOMO SAPIENS	KV205_HUMAN Ig kappa chain V-II region GM607 (Fragment)
Hexim1	[130-3]	0	P06310	1	1	9.8	4.48	2.5e-08	14706.8	HOMO SAPIENS	KV206_HUMAN Ig kappa chain V-II region RPMI 6410
Hexim1	[131]		P26373	3	3	15.2	1.86	0.00062	24261.7	HOMO SAPIENS	RL13_HUMAN 60S ribosomal protein L13
Hexim1	[132]		Q9Y3D9	5	5	26.3	1.17	0.00078	21770.8	HOMO SAPIENS	RT23_HUMAN 28S ribosomal protein S23, mitochondrial
Hexim1	[133]		P60174	2	2	9.4	2.72	4.5e-06	30791.3	HOMO SAPIENS	TPIS_HUMAN Triosephosphate isomerase
Hexim1	[134]		P60660	3	4	29.1	1.59	0.00075	16930.2	HOMO SAPIENS	MYL6_HUMAN Myosin light polypeptide 6
Hexim1	[134-1]	0	P14649	1	2	6.2	1.16	0.00075	22764.2	HOMO SAPIENS	MYL6B_HUMAN Myosin light chain 6B
Hexim1	[135]		P61604	1	1	13.7	4.13	5.5e-08	10931.8	HOMO SAPIENS	CH10_HUMAN 10 kDa heat shock protein, mitochondrial
Hexim1	[136]		Q86YZ3	3	3	1.6	1.57	0.0015	282392	HOMO SAPIENS	HORN_HUMAN Hornerin
Hexim1	[137]		Q4VCS5	3	3	4.2	1.78	0.00034	118086	HOMO SAPIENS	AMOT_HUMAN Angiomotin
Hexim1	[138]		Q14011	3	3	25	1.56	0.00089	18648.1	HOMO SAPIENS	CIRBP_HUMAN Cold-inducible RNA-binding protein
Hexim1	[139]		P36542	1	1	4	4.04	4.3e-08	32996.3	HOMO SAPIENS	ATPG_HUMAN ATP synthase subunit gamma, mitochondrial
Hexim1	[140]		P82673	2	2	14.2	2.49	5.1e-05	36844.6	HOMO SAPIENS	RT35_HUMAN 28S ribosomal protein S35, mitochondrial
Hexim1	[141]		P43686	2	2	10.8	2.54	1.8e-05	47366.7	HOMO SAPIENS	PRS6B_HUMAN 26S protease regulatory subunit 6B
Hexim1	[142]		Q96RR1	2	2	5	2.28	5.6e-05	77154.8	HOMO SAPIENS	PEO1_HUMAN Twinkle protein, mitochondrial
Hexim1	[143]		O60814	1	2	11.9	3.71	9.9e-07	13890.3	HOMO SAPIENS	H2B1K_HUMAN Histone H2B type 1-K
Hexim1	[143-1]	-1	P06899	1	2	11.9	3.71	9.9e-07	13904.3	HOMO SAPIENS	H2B1J_HUMAN Histone H2B type 1-J
Hexim1	[143-2]	-1	P23527	1	2	11.9	3.71	9.9e-07	13906.3	HOMO SAPIENS	H2B1O_HUMAN Histone H2B type 1-O
Hexim1	[143-3]	-1	P33778	1	2	11.9	3.71	9.9e-07	13950.3	HOMO SAPIENS	H2B1B_HUMAN Histone H2B type 1-B
Hexim1	[143-4]	-1	P57053	1	2	11.9	3.71	9.9e-07	13944.3	HOMO SAPIENS	H2BFS_HUMAN Histone H2B type F-S
Hexim1	[143-5]	-1	P58876	1	2	11.9	3.71	9.9e-07	13936.3	HOMO SAPIENS	H2B1D_HUMAN Histone H2B type 1-D
Hexim1	[143-6]	-1	P62807	1	2	11.9	3.71	9.9e-07	13906.3	HOMO SAPIENS	H2B1C_HUMAN Histone H2B type 1-C/E/F/G/I
Hexim1	[143-7]	-1	Q16778	1	2	11.9	3.71	9.9e-07	13920.3	HOMO SAPIENS	H2B2E_HUMAN Histone H2B type 2-E
Hexim1	[143-8]	-1	Q5QNW6	1	2	11.9	3.71	9.9e-07	13920.3	HOMO SAPIENS	H2B2F_HUMAN Histone H2B type 2-F
Hexim1	[143-9]	-1	Q8N257	1	2	11.9	3.71	9.9e-07	13908.2	HOMO SAPIENS	H2B3B_HUMAN Histone H2B type 3-B
Hexim1	[143-10]	-1	Q93079	1	2	11.9	3.71	9.9e-07	13892.2	HOMO SAPIENS	H2B1H_HUMAN Histone H2B type 1-H
Hexim1	[143-11]	-1	Q99877	1	2	11.9	3.71	9.9e-07	13922.3	HOMO SAPIENS	H2B1N_HUMAN Histone H2B type 1-N
Hexim1	[143-12]	-1	Q99879	1	2	11.9	3.71	9.9e-07	13989.4	HOMO SAPIENS	H2B1M_HUMAN Histone H2B type 1-M
Hexim1	[143-13]	-1	Q99880	1	2	11.9	3.71	9.9e-07	13952.3	HOMO SAPIENS	H2B1L_HUMAN Histone H2B type 1-L
Hexim1	[144]		P04080	3	3	49	1.65	0.00014	11139.7	HOMO SAPIENS	CYTB_HUMAN Cystatin-B
Hexim1	[145]		Q9Y285	1	1	2.8	3.64	4.4e-06	57564.1	HOMO SAPIENS	SYFA_HUMAN Phenylalanine--tRNA ligase alpha subunit
Hexim1	[146]		Q7Z3Y8	2	2	2	2.01	0.00056	49822.8	HOMO SAPIENS	K1C27_HUMAN Keratin, type I cytoskeletal 27
Hexim1	[146-1]	0	Q7Z3Y9	2	2	1.9	2.01	0.00056	51911.1	HOMO SAPIENS	K1C26_HUMAN Keratin, type I cytoskeletal 26
Hexim1	[146-2]	0	Q7Z3Z0	2	2	2	2.01	0.00056	49318.3	HOMO SAPIENS	K1C25_HUMAN Keratin, type I cytoskeletal 25
Hexim1	[147]		Q5T1J5	1	1	18.5	3.59	1.6e-06	15489.7	HOMO SAPIENS	CHCH9_HUMAN Putative coiled-coil-helix-coiled-coil-helix domain-containing protein CHCHD2P9, mitochondrial
Hexim1	[147-1]	0	Q9Y6H1	1	1	18.5	3.59	1.6e-06	15512.7	HOMO SAPIENS	CHCH2_HUMAN Coiled-coil-helix-coiled-coil-helix domain-containing protein 2, mitochondrial
Hexim1	[148]		P16989	2	2	10.2	2.1	5.5e-05	40090.2	HOMO SAPIENS	DBPA_HUMAN DNA-binding protein A
Hexim1	[149]		Q9Y2R5	1	1	22.3	3.48	9.7e-06	14502.2	HOMO SAPIENS	RT17_HUMAN 28S ribosomal protein S17, mitochondrial
Hexim1	[150]		P52272	4	5	6.2	0.91	0.002	77516.4	HOMO SAPIENS	HNRPM_HUMAN Heterogeneous nuclear ribonucleoprotein M
Hexim1	[151]		Q15637	3	3	7.8	1.45	0.00075	68330.5	HOMO SAPIENS	SF01_HUMAN Splicing factor 1
Hexim1	[152]		P61978	2	2	6	2.13	5.4e-05	50976.7	HOMO SAPIENS	HNRPK_HUMAN Heterogeneous nuclear ribonucleoprotein K
Hexim1	[153]		Q9UMS4	2	2	10.1	2.13	9.9e-05	55181.3	HOMO SAPIENS	PRP19_HUMAN Pre-mRNA-processing factor 19
Hexim1	[154]		P17980	3	3	11.4	1.32	0.00091	49204	HOMO SAPIENS	PRS6A_HUMAN 26S protease regulatory subunit 6A
Hexim1	[155]		Q86Y46	3	3	5.2	1.15	0.0069	58923.8	HOMO SAPIENS	K2C73_HUMAN Keratin, type II cytoskeletal 73
Hexim1	[155-1]	1	Q14CN4	2	2	3.1	0.75	0.0022	55877.8	HOMO SAPIENS	K2C72_HUMAN Keratin, type II cytoskeletal 72
Hexim1	[155-2]	0	Q3SY84	1	1	1.3	0.06	0.0073	57292	HOMO SAPIENS	K2C71_HUMAN Keratin, type II cytoskeletal 71
Hexim1	[155-3]	0	Q7RTS7	1	1	1.3	0.06	0.0073	57865.9	HOMO SAPIENS	K2C74_HUMAN Keratin, type II cytoskeletal 74
Hexim1	[155-4]	0	Q9NSB2	1	1	1.2	0.06	0.0073	64843	HOMO SAPIENS	KRT84_HUMAN Keratin, type II cuticular Hb4
Hexim1	[156]		P35573	3	3	4	1.22	0.0025	174765	HOMO SAPIENS	GDE_HUMAN Glycogen debranching enzyme
Hexim1	[157]		Q9Y262	2	2	5.9	2.08	6.5e-05	66727.6	HOMO SAPIENS	EIF3L_HUMAN Eukaryotic translation initiation factor 3 subunit L
Hexim1	[158]		P23284	2	2	10.2	2.1	0.00021	23742.7	HOMO SAPIENS	PPIB_HUMAN Peptidyl-prolyl cis-trans isomerase B
Hexim1	[159]		P62841	3	4	30.3	1.21	0.0071	17040.3	HOMO SAPIENS	RS15_HUMAN 40S ribosomal protein S15
Hexim1	[160]		Q9UHB9	3	3	11	1.14	0.0018	70730.2	HOMO SAPIENS	SRP68_HUMAN Signal recognition particle 68 kDa protein
Hexim1	[161]		Q13151	1	1	5.2	3.11	8.6e-06	30840.9	HOMO SAPIENS	ROA0_HUMAN Heterogeneous nuclear ribonucleoprotein A0
Hexim1	[162]		Q14974	2	2	3.1	1.64	0.00053	97171.1	HOMO SAPIENS	IMB1_HUMAN Importin subunit beta-1
Hexim1	[163]		O15371	3	3	8.8	1.06	0.0017	63973.3	HOMO SAPIENS	EIF3D_HUMAN Eukaryotic translation initiation factor 3 subunit D
Hexim1	[164]		Q16543	1	1	5.6	3.01	7.3e-07	44468.7	HOMO SAPIENS	CDC37_HUMAN Hsp90 co-chaperone Cdc37
Hexim1	[165]		Q92499	2	2	3.4	2.03	1.9e-05	82432.9	HOMO SAPIENS	DDX1_HUMAN ATP-dependent RNA helicase DDX1
Hexim1	[166]		O00232	1	1	2.9	2.96	3.3e-05	52904.9	HOMO SAPIENS	PSD12_HUMAN 26S proteasome non-ATPase regulatory subunit 12
Hexim1	[167]		Q9Y2Q9	2	2	19.8	1.87	0.00025	20843	HOMO SAPIENS	RT28_HUMAN 28S ribosomal protein S28, mitochondrial
Hexim1	[168]		Q15021	2	2	2.2	2.03	3.6e-05	157184	HOMO SAPIENS	CND1_HUMAN Condensin complex subunit 1
Hexim1	[169]		Q9Y295	2	2	6.8	1.81	8.6e-05	40542.5	HOMO SAPIENS	DRG1_HUMAN Developmentally-regulated GTP-binding protein 1
Hexim1	[170]		Q9NZL4	1	1	4.4	2.82	1.7e-06	39474.4	HOMO SAPIENS	HPBP1_HUMAN Hsp70-binding protein 1
Hexim1	[171]		Q14152	2	2	2.4	1.8	4.3e-05	166571	HOMO SAPIENS	EIF3A_HUMAN Eukaryotic translation initiation factor 3 subunit A
Hexim1	[172]		P63173	3	3	34.3	1.46	0.0001	8218	HOMO SAPIENS	RL38_HUMAN 60S ribosomal protein L38
Hexim1	[173]		Q99575	2	2	2.8	1.48	0.00063	114710	HOMO SAPIENS	POP1_HUMAN Ribonucleases P/MRP protein subunit POP1
Hexim1	[174]		Q8N163	2	2	2.5	1.86	6.7e-05	102902	HOMO SAPIENS	K1967_HUMAN Protein KIAA1967
Hexim1	[175]		P25787	1	1	9	2.57	9.9e-06	25898.8	HOMO SAPIENS	PSA2_HUMAN Proteasome subunit alpha type-2
Hexim1	[176]		Q92665	1	1	2.8	2.55	1.2e-05	45318.8	HOMO SAPIENS	RT31_HUMAN 28S ribosomal protein S31, mitochondrial
Hexim1	[177]		Q99714	1	1	7.7	2.55	7.9e-06	26923.3	HOMO SAPIENS	HCD2_HUMAN 3-hydroxyacyl-CoA dehydrogenase type-2
Hexim1	[178]		P83731	3	4	14.6	0.95	0.003	17779.1	HOMO SAPIENS	RL24_HUMAN 60S ribosomal protein L24
Hexim1	[179]		Q9Y3Y2	1	1	5.2	2.54	0.0001	26396.8	HOMO SAPIENS	CHTOP_HUMAN Chromatin target of PRMT1 protein
Hexim1	[180]		P05023	2	2	3.4	1.51	0.00097	112897	HOMO SAPIENS	AT1A1_HUMAN Sodium/potassium-transporting ATPase subunit alpha-1
Hexim1	[180-1]	0	P13637	2	2	3.5	1.51	0.00097	111750	HOMO SAPIENS	AT1A3_HUMAN Sodium/potassium-transporting ATPase subunit alpha-3
Hexim1	[180-2]	0	P50993	2	2	3.4	1.51	0.00097	112266	HOMO SAPIENS	AT1A2_HUMAN Sodium/potassium-transporting ATPase subunit alpha-2
Hexim1	[180-3]	0	Q13733	2	2	3.4	1.51	0.00097	114168	HOMO SAPIENS	AT1A4_HUMAN Sodium/potassium-transporting ATPase subunit alpha-4
Hexim1	[181]		Q13561	2	3	8.5	1.55	0.00014	44231.4	HOMO SAPIENS	DCTN2_HUMAN Dynactin subunit 2
Hexim1	[182]		Q15014	4	4	18.4	0.86	0.0012	32308.1	HOMO SAPIENS	MO4L2_HUMAN Mortality factor 4-like protein 2
Hexim1	[183]		Q12905	1	1	4.4	2.45	0.00046	43062.5	HOMO SAPIENS	ILF2_HUMAN Interleukin enhancer-binding factor 2
Hexim1	[184]		O43324	1	1	6.9	2.44	8.3e-05	19810.7	HOMO SAPIENS	MCA3_HUMAN Eukaryotic translation elongation factor 1 epsilon-1
Hexim1	[185]		Q9Y5Y2	1	1	10	2.39	5.6e-05	28825.6	HOMO SAPIENS	NUBP2_HUMAN Cytosolic Fe-S cluster assembly factor NUBP2
Hexim1	[186]		P0CG47	1	1	7	2.36	8.2e-05	25761.8	HOMO SAPIENS	UBB_HUMAN Polyubiquitin-B
Hexim1	[186-1]	0	P0CG48	1	1	2.3	2.36	8.2e-05	77029.2	HOMO SAPIENS	UBC_HUMAN Polyubiquitin-C
Hexim1	[186-2]	0	P62979	1	1	10.3	2.36	8.2e-05	17965.1	HOMO SAPIENS	RS27A_HUMAN Ubiquitin-40S ribosomal protein S27a
Hexim1	[186-3]	0	P62987	1	1	12.5	2.36	8.2e-05	14728.5	HOMO SAPIENS	RL40_HUMAN Ubiquitin-60S ribosomal protein L40
Hexim1	[187]		Q96CT7	1	1	5.8	2.35	2.3e-05	25835.4	HOMO SAPIENS	CC124_HUMAN Coiled-coil domain-containing protein 124
Hexim1	[188]		P13010	2	2	7.4	1.24	0.0087	82705.3	HOMO SAPIENS	XRCC5_HUMAN X-ray repair cross-complementing protein 5
Hexim1	[189]		P62277	2	3	14.6	1.35	0.0039	17222.4	HOMO SAPIENS	RS13_HUMAN 40S ribosomal protein S13
Hexim1	[190]		P22626	3	3	8.2	0.83	0.0032	37430	HOMO SAPIENS	ROA2_HUMAN Heterogeneous nuclear ribonucleoproteins A2/B1
Hexim1	[191]		P07355	1	1	4.1	2.29	4.4e-05	38604.4	HOMO SAPIENS	ANXA2_HUMAN Annexin A2
Hexim1	[192]		P17844	2	2	7.3	1.49	0.00031	69148.7	HOMO SAPIENS	DDX5_HUMAN Probable ATP-dependent RNA helicase DDX5
Hexim1	[192-1]	0	Q92841	1	1	1.8	1.49	0.00031	72372.1	HOMO SAPIENS	DDX17_HUMAN Probable ATP-dependent RNA helicase DDX17
Hexim1	[193]		P25788	2	2	8.2	1.4	0.00036	28433.5	HOMO SAPIENS	PSA3_HUMAN Proteasome subunit alpha type-3
Hexim1	[194]		Q96GA3	2	2	6.5	1.41	0.00014	54855.4	HOMO SAPIENS	LTV1_HUMAN Protein LTV1 homolog
Hexim1	[195]		O14950	1	1	5.8	2.15	2.9e-05	19779.3	HOMO SAPIENS	ML12B_HUMAN Myosin regulatory light chain 12B
Hexim1	[195-1]	0	P19105	1	1	5.8	2.15	2.9e-05	19794.3	HOMO SAPIENS	ML12A_HUMAN Myosin regulatory light chain 12A
Hexim1	[196]		Q14444	1	1	1.6	2.14	0.00014	78366.9	HOMO SAPIENS	CAPR1_HUMAN Caprin-1
Hexim1	[197]		Q9NXG2	1	1	4.5	2.13	2.1e-05	39315.7	HOMO SAPIENS	THUM1_HUMAN THUMP domain-containing protein 1
Hexim1	[198]		P60228	3	3	9	0.95	0.0019	52221.3	HOMO SAPIENS	EIF3E_HUMAN Eukaryotic translation initiation factor 3 subunit E
Hexim1	[199]		Q9NZT1	1	1	10.3	2.08	2.9e-05	15892.6	HOMO SAPIENS	CALL5_HUMAN Calmodulin-like protein 5
Hexim1	[200]		P62304	1	1	17.4	2.08	2.6e-05	10803.7	HOMO SAPIENS	RUXE_HUMAN Small nuclear ribonucleoprotein E
Hexim1	[201]		P55884	1	1	2.6	2.08	0.00018	92482.4	HOMO SAPIENS	EIF3B_HUMAN Eukaryotic translation initiation factor 3 subunit B
Hexim1	[202]		Q6P2Q9	1	1	1.1	2.07	0.002	273603	HOMO SAPIENS	PRP8_HUMAN Pre-mRNA-processing-splicing factor 8
Hexim1	[203]		P18621	2	2	10.3	1.05	0.0025	21397.2	HOMO SAPIENS	RL17_HUMAN 60S ribosomal protein L17
Hexim1	[204]		P48047	1	1	6.6	1.97	0.0003	23277.5	HOMO SAPIENS	ATPO_HUMAN ATP synthase subunit O, mitochondrial
Hexim1	[205]		Q7Z2W4	1	1	2.1	1.96	0.00042	101432	HOMO SAPIENS	ZCCHV_HUMAN Zinc finger CCCH-type antiviral protein 1
Hexim1	[206]		P12236	1	1	4.4	1.95	7.8e-05	32866.6	HOMO SAPIENS	ADT3_HUMAN ADP/ATP translocase 3
Hexim1	[207]		Q96QR8	1	1	4.2	1.95	3e-05	33241.1	HOMO SAPIENS	PURB_HUMAN Transcriptional activator protein Pur-beta
Hexim1	[208]		P62424	1	1	4.1	1.92	0.00031	29995.9	HOMO SAPIENS	RL7A_HUMAN 60S ribosomal protein L7a
Hexim1	[209]		P82650	1	1	3.3	1.87	7.8e-05	41280.7	HOMO SAPIENS	RT22_HUMAN 28S ribosomal protein S22, mitochondrial
Hexim1	[210]		P51665	1	1	7.4	1.85	0.0078	37025.7	HOMO SAPIENS	PSD7_HUMAN 26S proteasome non-ATPase regulatory subunit 7
Hexim1	[211]		P62316	1	1	8.5	1.85	0.00011	13527	HOMO SAPIENS	SMD2_HUMAN Small nuclear ribonucleoprotein Sm D2
Hexim1	[212]		O00231	1	1	2.6	1.85	8.6e-05	47464.2	HOMO SAPIENS	PSD11_HUMAN 26S proteasome non-ATPase regulatory subunit 11
Hexim1	[213]		Q8NBS9	2	3	4.6	1.2	0.00058	47629.3	HOMO SAPIENS	TXND5_HUMAN Thioredoxin domain-containing protein 5
Hexim1	[214]		Q9NTJ3	1	1	0.8	1.79	3.5e-05	147183	HOMO SAPIENS	SMC4_HUMAN Structural maintenance of chromosomes protein 4
Hexim1	[215]		O14818	1	1	4.4	1.72	0.00026	27887.1	HOMO SAPIENS	PSA7_HUMAN Proteasome subunit alpha type-7
Hexim1	[215-1]	0	Q8TAA3	1	1	4.3	1.72	0.00026	28530	HOMO SAPIENS	PSA7L_HUMAN Proteasome subunit alpha type-7-like
Hexim1	[216]		P62244	3	4	18.5	0.9	0.0013	14839.6	HOMO SAPIENS	RS15A_HUMAN 40S ribosomal protein S15a
Hexim1	[217]		P10412	2	2	11	1.21	0.00053	21865.4	HOMO SAPIENS	H14_HUMAN Histone H1.4
Hexim1	[217-1]	0	P16402	2	2	10.9	1.21	0.00053	22350.1	HOMO SAPIENS	H13_HUMAN Histone H1.3
Hexim1	[217-2]	0	P16403	2	2	11.3	1.21	0.00053	21364.9	HOMO SAPIENS	H12_HUMAN Histone H1.2
Hexim1	[217-3]	0	P22492	1	1	5.3	1.21	0.00053	22019.2	HOMO SAPIENS	H1T_HUMAN Histone H1t
Hexim1	[217-4]	0	Q02539	1	1	5.1	1.21	0.00053	21842.3	HOMO SAPIENS	H11_HUMAN Histone H1.1
Hexim1	[218]		Q7L5D6	1	1	4.3	1.65	0.00023	36504.6	HOMO SAPIENS	GET4_HUMAN Golgi to ER traffic protein 4 homolog
Hexim1	[219]		P62899	1	2	7.2	1.64	0.0023	14463	HOMO SAPIENS	RL31_HUMAN 60S ribosomal protein L31
Hexim1	[220]		Q9Y676	1	1	7.4	1.63	0.0011	29395.8	HOMO SAPIENS	RT18B_HUMAN 28S ribosomal protein S18b, mitochondrial
Hexim1	[221]		Q96LA8	1	1	3.7	1.63	0.00026	41937.9	HOMO SAPIENS	ANM6_HUMAN Protein arginine N-methyltransferase 6
Hexim1	[222]		Q16891	1	1	3.7	1.63	0.00055	83678.6	HOMO SAPIENS	IMMT_HUMAN Mitochondrial inner membrane protein
Hexim1	[223]		P05141	1	1	4.4	1.63	0.00041	32852.5	HOMO SAPIENS	ADT2_HUMAN ADP/ATP translocase 2
Hexim1	[224]		Q9Y237	1	1	22.9	1.61	0.00066	13810.1	HOMO SAPIENS	PIN4_HUMAN Peptidyl-prolyl cis-trans isomerase NIMA-interacting 4
Hexim1	[225]		P32969	1	1	21.4	1.61	0.0028	21863.6	HOMO SAPIENS	RL9_HUMAN 60S ribosomal protein L9
Hexim1	[226]		P53396	1	1	1.3	1.57	0.00028	120840	HOMO SAPIENS	ACLY_HUMAN ATP-citrate synthase
Hexim1	[227]		P63104	2	2	10.2	0.8	0.0045	27745.3	HOMO SAPIENS	1433Z_HUMAN 14-3-3 protein zeta/delta
Hexim1	[228]		Q9UNF1	1	1	2.1	1.53	9.8e-05	64954.8	HOMO SAPIENS	MAGD2_HUMAN Melanoma-associated antigen D2
Hexim1	[229]		Q6UX04	1	1	3.2	1.53	0.00014	53847.5	HOMO SAPIENS	CWC27_HUMAN Peptidyl-prolyl cis-trans isomerase CWC27 homolog
Hexim1	[230]		decoy	1	1	1.8	1.51	0.00024	93611.4	HOMO SAPIENS	DISC1_HUMAN Disrupted in schizophrenia 1 protein
Hexim1	[231]		P57723	1	1	3.5	1.5	0.00013	41482.1	HOMO SAPIENS	PCBP4_HUMAN Poly(rC)-binding protein 4
Hexim1	[232]		P06733	1	1	4.4	1.49	0.00073	47169.4	HOMO SAPIENS	ENOA_HUMAN Alpha-enolase
Hexim1	[233]		Q00059	1	2	4.1	1.49	0.0001	29096.9	HOMO SAPIENS	TFAM_HUMAN Transcription factor A, mitochondrial
Hexim1	[234]		Q5VTR2	1	1	1.4	1.46	0.00024	113663	HOMO SAPIENS	BRE1A_HUMAN E3 ubiquitin-protein ligase BRE1A
Hexim1	[235]		P20618	2	2	15.8	0.9	0.0042	26489.6	HOMO SAPIENS	PSB1_HUMAN Proteasome subunit beta type-1
Hexim1	[236]		Q9UBF2	1	1	2	1.45	0.00028	97623.2	HOMO SAPIENS	COPG2_HUMAN Coatomer subunit gamma-2
Hexim1	[237]		P05386	1	1	37.7	1.4	0.00049	11514	HOMO SAPIENS	RLA1_HUMAN 60S acidic ribosomal protein P1
Hexim1	[238]		P05388	2	2	9.1	0.8	0.0011	34273.8	HOMO SAPIENS	RLA0_HUMAN 60S acidic ribosomal protein P0
Hexim1	[238-1]	0	Q8NHW5	1	1	3.8	0.8	0.0011	34364.8	HOMO SAPIENS	RLA0L_HUMAN 60S acidic ribosomal protein P0-like
Hexim1	[239]		Q9Y230	2	2	5.8	0.79	0.0027	51157	HOMO SAPIENS	RUVB2_HUMAN RuvB-like 2
Hexim1	[240]		P24539	1	1	6.6	1.29	0.0011	28908.9	HOMO SAPIENS	AT5F1_HUMAN ATP synthase subunit b, mitochondrial
Hexim1	[241]		Q14839	2	2	1.3	0.77	0.0095	218006	HOMO SAPIENS	CHD4_HUMAN Chromodomain-helicase-DNA-binding protein 4
Hexim1	[241-1]	0	Q8TDI0	2	2	1.3	0.77	0.0095	223052	HOMO SAPIENS	CHD5_HUMAN Chromodomain-helicase-DNA-binding protein 5
Hexim1	[241-2]	0	Q12873	1	1	0.6	0.77	0.0095	226594	HOMO SAPIENS	CHD3_HUMAN Chromodomain-helicase-DNA-binding protein 3
Hexim1	[242]		decoy	1	2	2.4	1.24	0.0017	113425	HOMO SAPIENS	CP110_HUMAN Centriolar coiled-coil protein of 110 kDa
Hexim1	[243]		Q8TAQ2	1	1	1	1.23	0.00023	132880	HOMO SAPIENS	SMRC2_HUMAN SWI/SNF complex subunit SMARCC2
Hexim1	[243-1]	0	Q92922	1	1	1.1	1.23	0.00023	122868	HOMO SAPIENS	SMRC1_HUMAN SWI/SNF complex subunit SMARCC1
Hexim1	[244]		O00571	2	2	3.9	0.83	0.00092	73244	HOMO SAPIENS	DDX3X_HUMAN ATP-dependent RNA helicase DDX3X
Hexim1	[244-1]	0	O15523	1	1	1.8	0.83	0.00092	73154.2	HOMO SAPIENS	DDX3Y_HUMAN ATP-dependent RNA helicase DDX3Y
Hexim1	[244-2]	0	Q9NQI0	1	1	1.7	0.83	0.00092	79308.2	HOMO SAPIENS	DDX4_HUMAN Probable ATP-dependent RNA helicase DDX4
Hexim1	[245]		P04844	1	1	2.9	1.21	0.00015	69284.6	HOMO SAPIENS	RPN2_HUMAN Dolichyl-diphosphooligosaccharide--protein glycosyltransferase subunit 2
Hexim1	[246]		Q14203	1	1	0.8	1.21	0.0012	141696	HOMO SAPIENS	DCTN1_HUMAN Dynactin subunit 1
Hexim1	[247]		P55735	1	1	8.4	1.11	0.0011	35540.8	HOMO SAPIENS	SEC13_HUMAN Protein SEC13 homolog
Hexim1	[248]		O75533	2	2	2	0.72	0.0022	145832	HOMO SAPIENS	SF3B1_HUMAN Splicing factor 3B subunit 1
Hexim1	[249]		Q06830	1	2	6	1.08	0.0019	22110.5	HOMO SAPIENS	PRDX1_HUMAN Peroxiredoxin-1
Hexim1	[249-1]	0	Q13162	1	2	4.4	1.08	0.0019	30540.2	HOMO SAPIENS	PRDX4_HUMAN Peroxiredoxin-4
Hexim1	[250]		P61254	1	2	7.6	1.05	0.0056	17258.4	HOMO SAPIENS	RL26_HUMAN 60S ribosomal protein L26
Hexim1	[250-1]	0	Q9UNX3	1	2	7.6	1.05	0.0056	17256.4	HOMO SAPIENS	RL26L_HUMAN 60S ribosomal protein L26-like 1
Hexim1	[251]		P14174	2	3	18.3	0.65	0.0039	12476.4	HOMO SAPIENS	MIF_HUMAN Macrophage migration inhibitory factor
Hexim1	[252]		P47756	1	1	5.1	0.99	0.0016	31350.8	HOMO SAPIENS	CAPZB_HUMAN F-actin-capping protein subunit beta
Hexim1	[253]		P62888	1	1	13.9	0.96	0.0016	12784.2	HOMO SAPIENS	RL30_HUMAN 60S ribosomal protein L30
Hexim1	[254]		O95777	1	1	19.8	0.95	0.0009	10402.7	HOMO SAPIENS	NAA38_HUMAN N-alpha-acetyltransferase 38, NatC auxiliary subunit
Hexim1	[255]		P00338	1	1	2.7	0.91	0.0058	36689.1	HOMO SAPIENS	LDHA_HUMAN L-lactate dehydrogenase A chain
Hexim1	[256]		Q9Y6G9	1	1	3.3	0.9	0.0026	56579.6	HOMO SAPIENS	DC1L1_HUMAN Cytoplasmic dynein 1 light intermediate chain 1
Hexim1	[257]		O76094	1	1	1.5	0.9	0.0012	74606.8	HOMO SAPIENS	SRP72_HUMAN Signal recognition particle 72 kDa protein
Hexim1	[258]		Q9P2J5	1	1	1	0.84	0.00036	134467	HOMO SAPIENS	SYLC_HUMAN Leucine--tRNA ligase, cytoplasmic
Hexim1	[259]		Q96DG6	1	1	6.1	0.83	0.0031	28048.4	HOMO SAPIENS	CMBL_HUMAN Carboxymethylenebutenolidase homolog
Hexim1	[260]		P33991	1	1	2.1	0.8	0.0007	96558.8	HOMO SAPIENS	MCM4_HUMAN DNA replication licensing factor MCM4
Hexim1	[261]		P42766	1	1	10.6	0.77	0.0048	14551.6	HOMO SAPIENS	RL35_HUMAN 60S ribosomal protein L35
Hexim1	[262]		Q8NFD5	1	3	0.9	0.74	0.00035	236126	HOMO SAPIENS	ARI1B_HUMAN AT-rich interactive domain-containing protein 1B
Hexim1	[263]		P10301	1	2	5	0.72	0.0012	23480.7	HOMO SAPIENS	RRAS_HUMAN Ras-related protein R-Ras
Hexim1	[264]		P62906	1	1	7.4	0.72	0.0055	24831.5	HOMO SAPIENS	RL10A_HUMAN 60S ribosomal protein L10a
Hexim1	[265]		P09211	1	1	4.8	0.72	0.0025	23356	HOMO SAPIENS	GSTP1_HUMAN Glutathione S-transferase P
Hexim1	[266]		O43150	1	1	0.8	0.7	0.0028	111652	HOMO SAPIENS	ASAP2_HUMAN Arf-GAP with SH3 domain, ANK repeat and PH domain-containing protein 2
Hexim1	[267]		Q8WWM7	1	1	2.3	0.68	0.006	113374	HOMO SAPIENS	ATX2L_HUMAN Ataxin-2-like protein
Hexim1	[268]		P61163	2	2	9.8	0.42	0.0071	42614.1	HOMO SAPIENS	ACTZ_HUMAN Alpha-centractin
Hexim1	[268-1]	0	P42025	1	1	4	0.36	0.0071	42293.8	HOMO SAPIENS	ACTY_HUMAN Beta-centractin
Hexim1	[269]		Q13895	1	1	4.6	0.67	0.0085	49601.8	HOMO SAPIENS	BYST_HUMAN Bystin
Hexim1	[270]		Q08188	1	1	2.3	0.63	0.0032	76632.5	HOMO SAPIENS	TGM3_HUMAN Protein-glutamine gamma-glutamyltransferase E
Hexim1	[271]		Q99460	1	1	1.2	0.62	0.0052	105837	HOMO SAPIENS	PSMD1_HUMAN 26S proteasome non-ATPase regulatory subunit 1
Hexim1	[272]		Q13247	1	1	2.6	0.61	0.0013	39587.1	HOMO SAPIENS	SRSF6_HUMAN Serine/arginine-rich splicing factor 6
Hexim1	[273]		Q6YI46	1	1	7.1	0.61	0.0033	39665.1	HOMO SAPIENS	TMM64_HUMAN Transmembrane protein 64
Hexim1	[274]		P05109	1	1	11.8	0.6	0.0022	10834.6	HOMO SAPIENS	S10A8_HUMAN Protein S100-A8
Hexim1	[275]		P62258	1	1	4.7	0.57	0.0048	29174.2	HOMO SAPIENS	1433E_HUMAN 14-3-3 protein epsilon
Hexim1	[276]		P60981	1	1	7.9	0.56	0.0011	18505.9	HOMO SAPIENS	DEST_HUMAN Destrin
Hexim1	[277]		decoy	1	1	0.6	0.55	0.0084	289622	HOMO SAPIENS	DPOLQ_HUMAN DNA polymerase theta
Hexim1	[278]		P13639	1	1	1.4	0.55	0.0044	95339	HOMO SAPIENS	EF2_HUMAN Elongation factor 2
Hexim1	[279]		P82914	1	1	3.5	0.51	0.004	29842.4	HOMO SAPIENS	RT15_HUMAN 28S ribosomal protein S15, mitochondrial
Hexim1	[280]		Q14204	1	1	0.5	0.47	0.0093	532412	HOMO SAPIENS	DYHC1_HUMAN Cytoplasmic dynein 1 heavy chain 1
Hexim1	[281]		P37802	1	1	7	0.39	0.0045	22391.7	HOMO SAPIENS	TAGL2_HUMAN Transgelin-2
Hexim1	[281-1]	0	Q9UI15	1	1	7	0.39	0.0045	22472.9	HOMO SAPIENS	TAGL3_HUMAN Transgelin-3
Hexim1	[282]		P69905	1	1	10.6	0.39	0.0021	15257.7	HOMO SAPIENS	HBA_HUMAN Hemoglobin subunit alpha
Hexim1	[283]		decoy	1	1	6.4	0.39	0.0084	29541.1	HOMO SAPIENS	HES1_HUMAN Transcription factor HES-1
Hexim1	[284]		Q8WXX0	1	1	0.4	0.3	0.0045	461163	HOMO SAPIENS	DYH7_HUMAN Dynein heavy chain 7, axonemal
Hexim1	[285]		P33316	1	1	3.2	0.29	0.0093	26563.5	HOMO SAPIENS	DUT_HUMAN Deoxyuridine 5'-triphosphate nucleotidohydrolase, mitochondrial
Hexim1	[286]		decoy	1	2	2.5	0.28	0.007	57206.8	HOMO SAPIENS	AL1B1_HUMAN Aldehyde dehydrogenase X, mitochondrial
Hexim1	[287]		P38117	1	1	4.7	0.24	0.0071	27843.9	HOMO SAPIENS	ETFB_HUMAN Electron transfer flavoprotein subunit beta
Hexim1	[288]		P62191	1	1	2.7	0.23	0.0042	49184.9	HOMO SAPIENS	PRS4_HUMAN 26S protease regulatory subunit 4
Hexim1	[288-1]	0	P62195	1	1	3	0.23	0.0042	45626.4	HOMO SAPIENS	PRS8_HUMAN 26S protease regulatory subunit 8
Hexim1	[288-2]	0	Q8NB90	1	1	1.3	0.23	0.0042	97905.3	HOMO SAPIENS	SPAT5_HUMAN Spermatogenesis-associated protein 5
Hexim1	[289]		P26599	1	1	2.6	0.17	0.0073	57221.8	HOMO SAPIENS	PTBP1_HUMAN Polypyrimidine tract-binding protein 1
Hexim1	[290]		O94973	1	1	1.9	0.16	0.0055	103961	HOMO SAPIENS	AP2A2_HUMAN AP-2 complex subunit alpha-2
Hexim1	[290-1]	0	O95782	1	1	1.8	0.16	0.0055	107547	HOMO SAPIENS	AP2A1_HUMAN AP-2 complex subunit alpha-1
Hexim1	[291]		Q13428	1	1	0.6	0.14	0.0073	152107	HOMO SAPIENS	TCOF_HUMAN Treacle protein
Hexim1	[292]		decoy	1	1	4	0.11	0.0082	63964.8	HOMO SAPIENS	SARG_HUMAN Specifically androgen-regulated gene protein
Hexim1	[293]		Q9BX40	1	1	2.9	0.08	0.0056	42071	HOMO SAPIENS	LS14B_HUMAN Protein LSM14 homolog B

## Sheet: MEPCE #1
	ID			Rank	Uniq Pep	Acc #	Num Unique	Peptide Count	% Cov	Best Disc Score	Best Expect Val	Protein MW	Species	Protein Name
5327	hIP190-12	hIP190-012	MePCE	[1]		Q15020	42	80	52.2	6.43	1.5e-10	109936	HOMO SAPIENS	SART3_HUMAN Squamous cell carcinoma antigen recognized by T-cells 3
5328	hIP190-12	hIP190-012	MePCE	[2]		Q4G0J3	40	58	50	5.4	1.4e-09	66899.2	HOMO SAPIENS	LARP7_HUMAN La-related protein 7
5329	hIP190-12	hIP190-012	MePCE	[3]		Q7L2J0	24	41	48.6	4.07	3.2e-07	74355.8	HOMO SAPIENS	MEPCE_HUMAN 7SK snRNA methylphosphate capping enzyme
5330	hIP190-12	hIP190-012	MePCE	[4]		P23396	18	28	72	6.17	1.9e-10	26688.6	HOMO SAPIENS	RS3_HUMAN 40S ribosomal protein S3
5331	hIP190-12	hIP190-012	MePCE	[5]		P08107	16	21	35.6	4.8	2.6e-07	70052.8	HOMO SAPIENS	HSP71_HUMAN Heat shock 70 kDa protein 1A/1B
5332	hIP190-12	hIP190-012	MePCE	[5-1]	16	P11142	18	21	30.5	3.94	1.1e-07	70898.7	HOMO SAPIENS	HSP7C_HUMAN Heat shock cognate 71 kDa protein
5333	hIP190-12	hIP190-012	MePCE	[5-2]	1	P34931	8	10	18.3	3.8	2.6e-07	70375.6	HOMO SAPIENS	HS71L_HUMAN Heat shock 70 kDa protein 1-like
5334	hIP190-12	hIP190-012	MePCE	[5-3]	7	P11021	8	9	16.7	3.31	2.3e-06	72333.5	HOMO SAPIENS	GRP78_HUMAN 78 kDa glucose-regulated protein
5335	hIP190-12	hIP190-012	MePCE	[5-4]	0	P17066	4	7	8.7	4.8	2.6e-07	71028.7	HOMO SAPIENS	HSP76_HUMAN Heat shock 70 kDa protein 6
5336	hIP190-12	hIP190-012	MePCE	[5-5]	4	P54652	6	8	10.6	3.8	2.6e-07	70021.5	HOMO SAPIENS	HSP72_HUMAN Heat shock-related 70 kDa protein 2
5337	hIP190-12	hIP190-012	MePCE	[5-6]	0	P48741	3	5	10.9	3.8	2.6e-07	40244.8	HOMO SAPIENS	HSP77_HUMAN Putative heat shock 70 kDa protein 7
5338	hIP190-12	hIP190-012	MePCE	[6]		P05455	21	34	48.5	3.96	5.5e-07	46837.4	HOMO SAPIENS	LA_HUMAN Lupus La protein
5339	hIP190-12	hIP190-012	MePCE	[7]		Q08211	21	22	24.5	4.41	6.5e-08	140960	HOMO SAPIENS	DHX9_HUMAN ATP-dependent RNA helicase A
5340	hIP190-12	hIP190-012	MePCE	[8]		P07437	18	20	65.3	4.77	3.3e-08	49671.3	HOMO SAPIENS	TBB5_HUMAN Tubulin beta chain
5341	hIP190-12	hIP190-012	MePCE	[8-1]	3	P68371	17	18	61.8	3.82	9.3e-06	49831.5	HOMO SAPIENS	TBB4B_HUMAN Tubulin beta-4B chain
5342	hIP190-12	hIP190-012	MePCE	[8-2]	2	P04350	14	15	52.5	3.82	9.3e-06	49586.2	HOMO SAPIENS	TBB4A_HUMAN Tubulin beta-4A chain
5343	hIP190-12	hIP190-012	MePCE	[8-3]	1	Q9BVA1	12	14	47.2	3.96	4e-06	49953.5	HOMO SAPIENS	TBB2B_HUMAN Tubulin beta-2B chain
5344	hIP190-12	hIP190-012	MePCE	[8-4]	1	Q13885	11	13	38.4	3.96	4e-06	49907.4	HOMO SAPIENS	TBB2A_HUMAN Tubulin beta-2A chain
5345	hIP190-12	hIP190-012	MePCE	[8-5]	0	Q13509	8	9	20.7	3.05	4e-06	50433.2	HOMO SAPIENS	TBB3_HUMAN Tubulin beta-3 chain
5346	hIP190-12	hIP190-012	MePCE	[8-6]	1	Q3ZCM7	5	5	14.9	2.09	8e-05	49776.5	HOMO SAPIENS	TBB8_HUMAN Tubulin beta-8 chain
5347	hIP190-12	hIP190-012	MePCE	[8-7]	0	A6NNZ2	4	4	11.5	2.09	8e-05	49573.1	HOMO SAPIENS	TBB8B_HUMAN Tubulin beta-8 chain B
5348	hIP190-12	hIP190-012	MePCE	[8-8]	0	Q9BUF5	3	3	13	1.73	0.00019	49857.6	HOMO SAPIENS	TBB6_HUMAN Tubulin beta-6 chain
5349	hIP190-12	hIP190-012	MePCE	[8-9]	0	A6NKZ8	1	1	2.7	1.6	0.00022	41775.5	HOMO SAPIENS	YI016_HUMAN Putative tubulin beta chain-like protein ENSP00000290377
5350	hIP190-12	hIP190-012	MePCE	[8-10]	0	Q9H4B7	1	1	2.2	1.6	0.00022	50327.4	HOMO SAPIENS	TBB1_HUMAN Tubulin beta-1 chain
5351	hIP190-12	hIP190-012	MePCE	[9]		P61247	15	25	46.6	5.78	1.6e-09	29945.2	HOMO SAPIENS	RS3A_HUMAN 40S ribosomal protein S3a
5352	hIP190-12	hIP190-012	MePCE	[10]		Q9BUJ2	14	20	23.7	5.15	3.4e-08	95739.3	HOMO SAPIENS	HNRL1_HUMAN Heterogeneous nuclear ribonucleoprotein U-like protein 1
5353	hIP190-12	hIP190-012	MePCE	[11]		O43390	17	23	30.3	4.05	9.3e-07	70943.6	HOMO SAPIENS	HNRPR_HUMAN Heterogeneous nuclear ribonucleoprotein R
5354	hIP190-12	hIP190-012	MePCE	[11-1]	11	O60506	14	16	39.5	3.5	1.6e-06	69603.2	HOMO SAPIENS	HNRPQ_HUMAN Heterogeneous nuclear ribonucleoprotein Q
5355	hIP190-12	hIP190-012	MePCE	[12]		Q00839	14	18	27.8	5.53	6.8e-09	90585.2	HOMO SAPIENS	HNRPU_HUMAN Heterogeneous nuclear ribonucleoprotein U
5356	hIP190-12	hIP190-012	MePCE	[13]		P67809	11	22	66	5.56	1.4e-07	35924.5	HOMO SAPIENS	YBOX1_HUMAN Nuclease-sensitive element-binding protein 1
5357	hIP190-12	hIP190-012	MePCE	[13-1]	5	P16989	8	9	43.8	4.54	4.2e-08	40090.2	HOMO SAPIENS	DBPA_HUMAN DNA-binding protein A
5358	hIP190-12	hIP190-012	MePCE	[13-2]	0	Q9Y2T7	3	4	11	4.34	1.4e-07	38518.3	HOMO SAPIENS	YBOX2_HUMAN Y-box-binding protein 2
5359	hIP190-12	hIP190-012	MePCE	[14]		Q07021	11	183	42.9	5.69	1.3e-09	31362.5	HOMO SAPIENS	C1QBP_HUMAN Complement component 1 Q subcomponent-binding protein, mitochondrial
5360	hIP190-12	hIP190-012	MePCE	[15]		P62701	15	23	47.9	4.59	1.8e-08	29598	HOMO SAPIENS	RS4X_HUMAN 40S ribosomal protein S4, X isoform
5361	hIP190-12	hIP190-012	MePCE	[15-1]	0	P22090	4	7	12.5	3.3	1.7e-06	29455.9	HOMO SAPIENS	RS4Y1_HUMAN 40S ribosomal protein S4, Y isoform 1
5362	hIP190-12	hIP190-012	MePCE	[15-2]	0	Q8TD47	4	9	14.1	3.3	1.7e-06	29295.7	HOMO SAPIENS	RS4Y2_HUMAN 40S ribosomal protein S4, Y isoform 2
5363	hIP190-12	hIP190-012	MePCE	[16]		P52292	13	18	36.5	4.48	2.6e-07	57862.4	HOMO SAPIENS	IMA2_HUMAN Importin subunit alpha-2
5364	hIP190-12	hIP190-012	MePCE	[16-1]	0	A9QM74	1	1	2.1	3.44	7.5e-07	56938.4	HOMO SAPIENS	IMA8_HUMAN Importin subunit alpha-8
5365	hIP190-12	hIP190-012	MePCE	[17]		P46782	11	18	51	5.19	3.8e-08	22876.6	HOMO SAPIENS	RS5_HUMAN 40S ribosomal protein S5
5366	hIP190-12	hIP190-012	MePCE	[18]		P11940	13	13	22.3	4.57	7.6e-08	70671.5	HOMO SAPIENS	PABP1_HUMAN Polyadenylate-binding protein 1
5367	hIP190-12	hIP190-012	MePCE	[18-1]	2	Q13310	7	7	13.5	4.57	7.6e-08	70783.5	HOMO SAPIENS	PABP4_HUMAN Polyadenylate-binding protein 4
5368	hIP190-12	hIP190-012	MePCE	[18-2]	0	Q9H361	7	7	12.7	1.44	0.00043	70031.5	HOMO SAPIENS	PABP3_HUMAN Polyadenylate-binding protein 3
5369	hIP190-12	hIP190-012	MePCE	[19]		P19338	14	20	20	4.02	2e-07	76615	HOMO SAPIENS	NUCL_HUMAN Nucleolin
5370	hIP190-12	hIP190-012	MePCE	[20]		P68363	11	15	33.9	4.55	1.3e-07	50152.1	HOMO SAPIENS	TBA1B_HUMAN Tubulin alpha-1B chain
5371	hIP190-12	hIP190-012	MePCE	[20-1]	0	Q71U36	11	15	33.9	4.55	1.3e-07	50136.1	HOMO SAPIENS	TBA1A_HUMAN Tubulin alpha-1A chain
5372	hIP190-12	hIP190-012	MePCE	[20-2]	1	Q9BQE3	10	13	34.1	4.55	1.3e-07	49895.8	HOMO SAPIENS	TBA1C_HUMAN Tubulin alpha-1C chain
5373	hIP190-12	hIP190-012	MePCE	[20-3]	0	Q13748	9	13	28.7	3.88	1.3e-07	49960	HOMO SAPIENS	TBA3C_HUMAN Tubulin alpha-3C/D chain
5374	hIP190-12	hIP190-012	MePCE	[20-4]	0	P68366	8	11	24.1	2.68	4.8e-05	49924.9	HOMO SAPIENS	TBA4A_HUMAN Tubulin alpha-4A chain
5375	hIP190-12	hIP190-012	MePCE	[20-5]	0	Q6PEY2	6	9	19.6	3.88	1.3e-07	49859	HOMO SAPIENS	TBA3E_HUMAN Tubulin alpha-3E chain
5376	hIP190-12	hIP190-012	MePCE	[20-6]	0	Q9NY65	4	5	13.1	2.15	0.00036	50094	HOMO SAPIENS	TBA8_HUMAN Tubulin alpha-8 chain
5377	hIP190-12	hIP190-012	MePCE	[20-7]	0	A6NHL2	1	1	2	1.91	5.3e-05	49909.2	HOMO SAPIENS	TBAL3_HUMAN Tubulin alpha chain-like 3
5378	hIP190-12	hIP190-012	MePCE	[21]		P38646	11	11	23	4.43	1.3e-07	73681.1	HOMO SAPIENS	GRP75_HUMAN Stress-70 protein, mitochondrial
5379	hIP190-12	hIP190-012	MePCE	[22]		Q86W50	9	10	22.8	4.53	1.6e-06	63621.6	HOMO SAPIENS	MET16_HUMAN Methyltransferase-like protein 16
5380	hIP190-12	hIP190-012	MePCE	[23]		P62241	10	18	57.7	4.07	5.7e-07	24205.4	HOMO SAPIENS	RS8_HUMAN 40S ribosomal protein S8
5381	hIP190-12	hIP190-012	MePCE	[24]		P10619	7	11	20	6.13	5.9e-10	54466.6	HOMO SAPIENS	PPGB_HUMAN Lysosomal protective protein
5382	hIP190-12	hIP190-012	MePCE	[25]		P25398	10	19	57.6	4.73	1.2e-08	14515.1	HOMO SAPIENS	RS12_HUMAN 40S ribosomal protein S12
5383	hIP190-12	hIP190-012	MePCE	[26]		P16278	9	10	19.8	4.35	9.1e-07	76075.5	HOMO SAPIENS	BGAL_HUMAN Beta-galactosidase
5384	hIP190-12	hIP190-012	MePCE	[26-1]	0	Q6UWU2	1	1	1.8	0.5	0.0029	74158.7	HOMO SAPIENS	GLB1L_HUMAN Beta-galactosidase-1-like protein
5385	hIP190-12	hIP190-012	MePCE	[27]		Q9Y6H1	7	29	38.4	5.2	6.1e-08	15512.7	HOMO SAPIENS	CHCH2_HUMAN Coiled-coil-helix-coiled-coil-helix domain-containing protein 2, mitochondrial
5386	hIP190-12	hIP190-012	MePCE	[27-1]	0	Q5T1J5	4	20	31.8	5.2	6.1e-08	15489.7	HOMO SAPIENS	CHCH9_HUMAN Putative coiled-coil-helix-coiled-coil-helix domain-containing protein CHCHD2P9, mitochondrial
5387	hIP190-12	hIP190-012	MePCE	[28]		P82933	9	11	26.3	5.05	3.2e-09	45835.2	HOMO SAPIENS	RT09_HUMAN 28S ribosomal protein S9, mitochondrial
5388	hIP190-12	hIP190-012	MePCE	[29]		P15880	11	19	30.4	3.54	8.9e-07	31324.7	HOMO SAPIENS	RS2_HUMAN 40S ribosomal protein S2
5389	hIP190-12	hIP190-012	MePCE	[30]		P36578	10	12	29.5	3.39	1.7e-05	47697.7	HOMO SAPIENS	RL4_HUMAN 60S ribosomal protein L4
5390	hIP190-12	hIP190-012	MePCE	[31]		Q14739	9	13	17.1	3.51	2.6e-05	70703.8	HOMO SAPIENS	LBR_HUMAN Lamin-B receptor
5391	hIP190-12	hIP190-012	MePCE	[32]		O00629	9	12	32.2	3.42	3.4e-06	57887.2	HOMO SAPIENS	IMA4_HUMAN Importin subunit alpha-4
5392	hIP190-12	hIP190-012	MePCE	[32-1]	2	O00505	3	3	9.2	3.06	3.4e-06	57811.4	HOMO SAPIENS	IMA3_HUMAN Importin subunit alpha-3
5393	hIP190-12	hIP190-012	MePCE	[33]		P46783	7	11	48.5	4.48	1.7e-07	18897.9	HOMO SAPIENS	RS10_HUMAN 40S ribosomal protein S10
5394	hIP190-12	hIP190-012	MePCE	[33-1]	0	Q9NQ39	3	6	17.6	4.48	1.7e-07	20120.5	HOMO SAPIENS	RS10L_HUMAN Putative 40S ribosomal protein S10-like
5395	hIP190-12	hIP190-012	MePCE	[34]		P39019	11	15	55.2	2.55	3.9e-05	16060.6	HOMO SAPIENS	RS19_HUMAN 40S ribosomal protein S19
5396	hIP190-12	hIP190-012	MePCE	[35]		Q7L2E3	9	10	10.5	3.01	4.9e-06	133939	HOMO SAPIENS	DHX30_HUMAN Putative ATP-dependent RNA helicase DHX30
5397	hIP190-12	hIP190-012	MePCE	[36]		P62249	11	18	64.4	2.99	2.6e-06	16445.5	HOMO SAPIENS	RS16_HUMAN 40S ribosomal protein S16
5398	hIP190-12	hIP190-012	MePCE	[37]		P62269	8	17	38.8	3.55	1.3e-06	17718.8	HOMO SAPIENS	RS18_HUMAN 40S ribosomal protein S18
5399	hIP190-12	hIP190-012	MePCE	[38]		P37108	6	7	44.1	5.01	4.5e-08	14570.1	HOMO SAPIENS	SRP14_HUMAN Signal recognition particle 14 kDa protein
5400	hIP190-12	hIP190-012	MePCE	[39]		P62263	7	12	39.7	4.42	3.4e-08	16272.9	HOMO SAPIENS	RS14_HUMAN 40S ribosomal protein S14
5401	hIP190-12	hIP190-012	MePCE	[40]		P08865	6	6	31.5	4.03	8.8e-07	32854.4	HOMO SAPIENS	RSSA_HUMAN 40S ribosomal protein SA
5402	hIP190-12	hIP190-012	MePCE	[41]		P62829	5	12	32.9	6.18	2.8e-12	14865.6	HOMO SAPIENS	RL23_HUMAN 60S ribosomal protein L23
5403	hIP190-12	hIP190-012	MePCE	[42]		Q8WWY3	6	6	18.4	4.15	9.1e-08	55456.5	HOMO SAPIENS	PRP31_HUMAN U4/U6 small nuclear ribonucleoprotein Prp31
5404	hIP190-12	hIP190-012	MePCE	[43]		Q9NZI8	6	6	14.9	4.11	5.1e-07	63481.1	HOMO SAPIENS	IF2B1_HUMAN Insulin-like growth factor 2 mRNA-binding protein 1
5405	hIP190-12	hIP190-012	MePCE	[43-1]	0	O00425	1	1	2.2	1.77	0.00067	63705.6	HOMO SAPIENS	IF2B3_HUMAN Insulin-like growth factor 2 mRNA-binding protein 3
5406	hIP190-12	hIP190-012	MePCE	[43-2]	0	Q9Y6M1	1	1	2.2	1.77	0.00067	66121.9	HOMO SAPIENS	IF2B2_HUMAN Insulin-like growth factor 2 mRNA-binding protein 2
5407	hIP190-12	hIP190-012	MePCE	[44]		P46781	9	11	37.1	3.6	3.5e-07	22591.6	HOMO SAPIENS	RS9_HUMAN 40S ribosomal protein S9
5408	hIP190-12	hIP190-012	MePCE	[45]		P30050	5	6	43	4.57	5.1e-08	17818.7	HOMO SAPIENS	RL12_HUMAN 60S ribosomal protein L12
5409	hIP190-12	hIP190-012	MePCE	[46]		P39023	7	7	22.3	2.82	0.00011	46109.3	HOMO SAPIENS	RL3_HUMAN 60S ribosomal protein L3
5410	hIP190-12	hIP190-012	MePCE	[47]		Q96EY7	6	6	12.5	3.44	2.3e-06	78550.4	HOMO SAPIENS	PTCD3_HUMAN Pentatricopeptide repeat-containing protein 3, mitochondrial
5411	hIP190-12	hIP190-012	MePCE	[48]		P51398	5	5	14.3	4.49	2e-07	45566.8	HOMO SAPIENS	RT29_HUMAN 28S ribosomal protein S29, mitochondrial
5412	hIP190-12	hIP190-012	MePCE	[49]		O43395	10	15	23.6	2.2	0.00021	77529.6	HOMO SAPIENS	PRPF3_HUMAN U4/U6 small nuclear ribonucleoprotein Prp3
5413	hIP190-12	hIP190-012	MePCE	[50]		P08708	5	7	51.9	5.41	7.3e-10	15550.3	HOMO SAPIENS	RS17_HUMAN 40S ribosomal protein S17
5414	hIP190-12	hIP190-012	MePCE	[50-1]	0	P0CW22	5	7	51.9	5.41	7.3e-10	15550.3	HOMO SAPIENS	RS17L_HUMAN 40S ribosomal protein S17-like
5415	hIP190-12	hIP190-012	MePCE	[51]		O43172	9	9	26.8	2.5	1e-05	58449.7	HOMO SAPIENS	PRP4_HUMAN U4/U6 small nuclear ribonucleoprotein Prp4
5416	hIP190-12	hIP190-012	MePCE	[52]		Q9H6E5	7	7	12.9	3.43	1.7e-06	93847.7	HOMO SAPIENS	STPAP_HUMAN Speckle targeted PIP5K1A-regulated poly(A) polymerase
5417	hIP190-12	hIP190-012	MePCE	[53]		Q99623	5	5	20.1	3.9	3.1e-06	33296.7	HOMO SAPIENS	PHB2_HUMAN Prohibitin-2
5418	hIP190-12	hIP190-012	MePCE	[54]		P78347	8	8	13.8	2.67	5.4e-06	112417	HOMO SAPIENS	GTF2I_HUMAN General transcription factor II-I
5419	hIP190-12	hIP190-012	MePCE	[55]		P16403	6	6	25.8	3.52	2.3e-07	21364.9	HOMO SAPIENS	H12_HUMAN Histone H1.2
5420	hIP190-12	hIP190-012	MePCE	[55-1]	1	P10412	5	5	23.3	1.94	4.2e-05	21865.4	HOMO SAPIENS	H14_HUMAN Histone H1.4
5421	hIP190-12	hIP190-012	MePCE	[55-2]	0	P16402	4	4	15.4	1.91	5.3e-05	22350.1	HOMO SAPIENS	H13_HUMAN Histone H1.3
5422	hIP190-12	hIP190-012	MePCE	[55-3]	0	P22492	1	1	5.3	1.82	5.4e-05	22019.2	HOMO SAPIENS	H1T_HUMAN Histone H1t
5423	hIP190-12	hIP190-012	MePCE	[55-4]	0	Q02539	1	1	5.1	1.82	5.4e-05	21842.3	HOMO SAPIENS	H11_HUMAN Histone H1.1
5424	hIP190-12	hIP190-012	MePCE	[56]		P06748	5	8	24.8	4.46	2.9e-08	32575.3	HOMO SAPIENS	NPM_HUMAN Nucleophosmin
5425	hIP190-12	hIP190-012	MePCE	[57]		P27635	7	8	29.4	2.67	5.8e-06	24604.1	HOMO SAPIENS	RL10_HUMAN 60S ribosomal protein L10
5426	hIP190-12	hIP190-012	MePCE	[57-1]	0	Q96L21	3	4	9.3	2.39	5.8e-06	24519	HOMO SAPIENS	RL10L_HUMAN 60S ribosomal protein L10-like
5427	hIP190-12	hIP190-012	MePCE	[58]		P82650	7	7	27.2	2.71	3.6e-05	41280.7	HOMO SAPIENS	RT22_HUMAN 28S ribosomal protein S22, mitochondrial
5428	hIP190-12	hIP190-012	MePCE	[59]		P62851	6	7	40.8	3.32	4.4e-06	13742.2	HOMO SAPIENS	RS25_HUMAN 40S ribosomal protein S25
5429	hIP190-12	hIP190-012	MePCE	[60]		Q9Y2S7	6	6	24.2	2.94	2.3e-05	42033.6	HOMO SAPIENS	PDIP2_HUMAN Polymerase delta-interacting protein 2
5430	hIP190-12	hIP190-012	MePCE	[61]		P83731	4	4	24.8	4.32	6.9e-06	17779.1	HOMO SAPIENS	RL24_HUMAN 60S ribosomal protein L24
5431	hIP190-12	hIP190-012	MePCE	[62]		P62277	5	6	29.1	3.61	5.4e-06	17222.4	HOMO SAPIENS	RS13_HUMAN 40S ribosomal protein S13
5432	hIP190-12	hIP190-012	MePCE	[63]		P62424	6	6	26.3	3.32	1.5e-06	29995.9	HOMO SAPIENS	RL7A_HUMAN 60S ribosomal protein L7a
5433	hIP190-12	hIP190-012	MePCE	[64]		P09651	4	4	12.1	4.74	1.4e-08	38746.9	HOMO SAPIENS	ROA1_HUMAN Heterogeneous nuclear ribonucleoprotein A1
5434	hIP190-12	hIP190-012	MePCE	[64-1]	0	Q32P51	3	3	8.4	2.07	6.6e-05	34225.6	HOMO SAPIENS	RA1L2_HUMAN Heterogeneous nuclear ribonucleoprotein A1-like 2
5435	hIP190-12	hIP190-012	MePCE	[65]		O60814	4	5	20.6	4.54	3.1e-08	13890.3	HOMO SAPIENS	H2B1K_HUMAN Histone H2B type 1-K
5436	hIP190-12	hIP190-012	MePCE	[65-1]	-1	P06899	4	5	20.6	4.54	3.1e-08	13904.3	HOMO SAPIENS	H2B1J_HUMAN Histone H2B type 1-J
5437	hIP190-12	hIP190-012	MePCE	[65-2]	-1	P23527	4	5	20.6	4.54	3.1e-08	13906.3	HOMO SAPIENS	H2B1O_HUMAN Histone H2B type 1-O
5438	hIP190-12	hIP190-012	MePCE	[65-3]	-1	P33778	4	5	20.6	4.54	3.1e-08	13950.3	HOMO SAPIENS	H2B1B_HUMAN Histone H2B type 1-B
5439	hIP190-12	hIP190-012	MePCE	[65-4]	-1	P57053	4	5	20.6	4.54	3.1e-08	13944.3	HOMO SAPIENS	H2BFS_HUMAN Histone H2B type F-S
5440	hIP190-12	hIP190-012	MePCE	[65-5]	-1	P58876	4	5	20.6	4.54	3.1e-08	13936.3	HOMO SAPIENS	H2B1D_HUMAN Histone H2B type 1-D
5441	hIP190-12	hIP190-012	MePCE	[65-6]	-1	P62807	4	5	20.6	4.54	3.1e-08	13906.3	HOMO SAPIENS	H2B1C_HUMAN Histone H2B type 1-C/E/F/G/I
5442	hIP190-12	hIP190-012	MePCE	[65-7]	-1	Q16778	4	5	20.6	4.54	3.1e-08	13920.3	HOMO SAPIENS	H2B2E_HUMAN Histone H2B type 2-E
5443	hIP190-12	hIP190-012	MePCE	[65-8]	-1	Q5QNW6	4	5	20.6	4.54	3.1e-08	13920.3	HOMO SAPIENS	H2B2F_HUMAN Histone H2B type 2-F
5444	hIP190-12	hIP190-012	MePCE	[65-9]	-1	Q8N257	4	5	20.6	4.54	3.1e-08	13908.2	HOMO SAPIENS	H2B3B_HUMAN Histone H2B type 3-B
5445	hIP190-12	hIP190-012	MePCE	[65-10]	-1	Q93079	4	5	20.6	4.54	3.1e-08	13892.2	HOMO SAPIENS	H2B1H_HUMAN Histone H2B type 1-H
5446	hIP190-12	hIP190-012	MePCE	[65-11]	-1	Q99877	4	5	20.6	4.54	3.1e-08	13922.3	HOMO SAPIENS	H2B1N_HUMAN Histone H2B type 1-N
5447	hIP190-12	hIP190-012	MePCE	[65-12]	-1	Q99879	4	5	20.6	4.54	3.1e-08	13989.4	HOMO SAPIENS	H2B1M_HUMAN Histone H2B type 1-M
5448	hIP190-12	hIP190-012	MePCE	[65-13]	-1	Q99880	4	5	20.6	4.54	3.1e-08	13952.3	HOMO SAPIENS	H2B1L_HUMAN Histone H2B type 1-L
5449	hIP190-12	hIP190-012	MePCE	[65-14]	0	Q96A08	2	2	8.7	0.54	0.0022	14167.6	HOMO SAPIENS	H2B1A_HUMAN Histone H2B type 1-A
5450	hIP190-12	hIP190-012	MePCE	[66]		P62750	5	7	37.2	3.42	3.6e-06	17695.2	HOMO SAPIENS	RL23A_HUMAN 60S ribosomal protein L23a
5451	hIP190-12	hIP190-012	MePCE	[67]		P62857	5	7	46.4	3.01	3.4e-05	7841.1	HOMO SAPIENS	RS28_HUMAN 40S ribosomal protein S28
5452	hIP190-12	hIP190-012	MePCE	[68]		P05387	3	6	55.7	5.39	1.3e-08	11665	HOMO SAPIENS	RLA2_HUMAN 60S acidic ribosomal protein P2
5453	hIP190-12	hIP190-012	MePCE	[69]		O94992	3	4	27.6	5.41	1.8e-09	40623.8	HOMO SAPIENS	HEXI1_HUMAN Protein HEXIM1
5454	hIP190-12	hIP190-012	MePCE	[70]		P62888	5	7	58.3	3	2.1e-05	12784.2	HOMO SAPIENS	RL30_HUMAN 60S ribosomal protein L30
5455	hIP190-12	hIP190-012	MePCE	[71]		P50990	6	6	14.2	2.56	1.4e-05	59621.1	HOMO SAPIENS	TCPQ_HUMAN T-complex protein 1 subunit theta
5456	hIP190-12	hIP190-012	MePCE	[72]		P67870	4	5	33.5	4.23	1.6e-07	24942.7	HOMO SAPIENS	CSK2B_HUMAN Casein kinase II subunit beta
5457	hIP190-12	hIP190-012	MePCE	[73]		P62266	4	5	41.3	3.95	9.6e-07	15807.7	HOMO SAPIENS	RS23_HUMAN 40S ribosomal protein S23
5458	hIP190-12	hIP190-012	MePCE	[74]		P46779	5	6	25.5	2.98	9.5e-06	15747.6	HOMO SAPIENS	RL28_HUMAN 60S ribosomal protein L28
5459	hIP190-12	hIP190-012	MePCE	[75]		P62841	5	7	49	2.56	0.00072	17040.3	HOMO SAPIENS	RS15_HUMAN 40S ribosomal protein S15
5460	hIP190-12	hIP190-012	MePCE	[76]		P22626	5	7	19.8	3.03	5.9e-06	37430	HOMO SAPIENS	ROA2_HUMAN Heterogeneous nuclear ribonucleoproteins A2/B1
5461	hIP190-12	hIP190-012	MePCE	[77]		Q14011	4	4	29.1	3.71	1.8e-06	18648.1	HOMO SAPIENS	CIRBP_HUMAN Cold-inducible RNA-binding protein
5462	hIP190-12	hIP190-012	MePCE	[78]		P50991	6	7	15.8	2.39	5.4e-05	57924.8	HOMO SAPIENS	TCPD_HUMAN T-complex protein 1 subunit delta
5463	hIP190-12	hIP190-012	MePCE	[79]		P62913	4	5	20.2	3.56	3.9e-07	20252.6	HOMO SAPIENS	RL11_HUMAN 60S ribosomal protein L11
5464	hIP190-12	hIP190-012	MePCE	[80]		P35637	5	7	16.9	2.71	0.00045	53426.2	HOMO SAPIENS	FUS_HUMAN RNA-binding protein FUS
5465	hIP190-12	hIP190-012	MePCE	[81]		P21333	6	6	3.8	3.16	7.9e-07	280741	HOMO SAPIENS	FLNA_HUMAN Filamin-A
5466	hIP190-12	hIP190-012	MePCE	[82]		P62753	5	7	21.3	3.07	6.5e-07	28680.9	HOMO SAPIENS	RS6_HUMAN 40S ribosomal protein S6
5467	hIP190-12	hIP190-012	MePCE	[83]		P29692	4	4	21.4	3.79	3e-07	31122.1	HOMO SAPIENS	EF1D_HUMAN Elongation factor 1-delta
5468	hIP190-12	hIP190-012	MePCE	[84]		P05388	4	6	17.4	3.22	4.2e-07	34273.8	HOMO SAPIENS	RLA0_HUMAN 60S acidic ribosomal protein P0
5469	hIP190-12	hIP190-012	MePCE	[84-1]	0	Q8NHW5	4	6	17.4	3.22	4.2e-07	34364.8	HOMO SAPIENS	RLA0L_HUMAN 60S acidic ribosomal protein P0-like
5470	hIP190-12	hIP190-012	MePCE	[85]		P26641	3	4	10.5	4.37	3.9e-07	50119.2	HOMO SAPIENS	EF1G_HUMAN Elongation factor 1-gamma
5471	hIP190-12	hIP190-012	MePCE	[86]		P40227	3	4	9.4	4.55	4.7e-08	58024.7	HOMO SAPIENS	TCPZ_HUMAN T-complex protein 1 subunit zeta
5472	hIP190-12	hIP190-012	MePCE	[87]		P62805	5	6	39.8	2.92	1.4e-05	11367.4	HOMO SAPIENS	H4_HUMAN Histone H4
5473	hIP190-12	hIP190-012	MePCE	[88]		Q6PKG0	3	3	6.1	4.03	1.4e-05	123511	HOMO SAPIENS	LARP1_HUMAN La-related protein 1
5474	hIP190-12	hIP190-012	MePCE	[89]		P23246	4	4	11	3.19	5.2e-06	76150	HOMO SAPIENS	SFPQ_HUMAN Splicing factor, proline- and glutamine-rich
5475	hIP190-12	hIP190-012	MePCE	[90]		P05386	2	4	51.8	4.8	1.9e-08	11514	HOMO SAPIENS	RLA1_HUMAN 60S acidic ribosomal protein P1
5476	hIP190-12	hIP190-012	MePCE	[91]		Q02543	3	3	17	3.72	3.5e-06	20762.6	HOMO SAPIENS	RL18A_HUMAN 60S ribosomal protein L18a
5477	hIP190-12	hIP190-012	MePCE	[92]		P62917	4	6	30	2.94	2.3e-05	28024.9	HOMO SAPIENS	RL8_HUMAN 60S ribosomal protein L8
5478	hIP190-12	hIP190-012	MePCE	[93]		P62280	6	8	43.7	2.09	0.00011	18430.9	HOMO SAPIENS	RS11_HUMAN 40S ribosomal protein S11
5479	hIP190-12	hIP190-012	MePCE	[94]		P50750	4	4	12.1	3.99	2.3e-08	42777.9	HOMO SAPIENS	CDK9_HUMAN Cyclin-dependent kinase 9
5480	hIP190-12	hIP190-012	MePCE	[95]		P68104	5	5	15.8	2.29	4.6e-05	50141.3	HOMO SAPIENS	EF1A1_HUMAN Elongation factor 1-alpha 1
5481	hIP190-12	hIP190-012	MePCE	[95-1]	0	Q5VTE0	5	5	15.8	2.29	4.6e-05	50185.5	HOMO SAPIENS	EF1A3_HUMAN Putative elongation factor 1-alpha-like 3
5482	hIP190-12	hIP190-012	MePCE	[95-2]	0	Q05639	2	2	4.5	1.98	4.7e-05	50470.6	HOMO SAPIENS	EF1A2_HUMAN Elongation factor 1-alpha 2
5483	hIP190-12	hIP190-012	MePCE	[96]		P62979	5	7	37.2	2.52	1.8e-05	17965.1	HOMO SAPIENS	RS27A_HUMAN Ubiquitin-40S ribosomal protein S27a
5484	hIP190-12	hIP190-012	MePCE	[96-1]	1	P62987	2	2	20.3	1.17	0.0012	14728.5	HOMO SAPIENS	RL40_HUMAN Ubiquitin-60S ribosomal protein L40
5485	hIP190-12	hIP190-012	MePCE	[96-2]	0	P0CG47	1	1	7	1.17	0.0012	25761.8	HOMO SAPIENS	UBB_HUMAN Polyubiquitin-B
5486	hIP190-12	hIP190-012	MePCE	[96-3]	0	P0CG48	1	1	2.3	1.17	0.0012	77029.2	HOMO SAPIENS	UBC_HUMAN Polyubiquitin-C
5487	hIP190-12	hIP190-012	MePCE	[97]		P62081	4	5	20.1	2.5	0.0015	22127	HOMO SAPIENS	RS7_HUMAN 40S ribosomal protein S7
5488	hIP190-12	hIP190-012	MePCE	[98]		O43447	4	5	39.5	3.07	4.5e-06	19208.3	HOMO SAPIENS	PPIH_HUMAN Peptidyl-prolyl cis-trans isomerase H
5489	hIP190-12	hIP190-012	MePCE	[99]		Q9Y2R5	3	3	44.6	3.84	9.9e-07	14502.2	HOMO SAPIENS	RT17_HUMAN 28S ribosomal protein S17, mitochondrial
5490	hIP190-12	hIP190-012	MePCE	[100]		P82912	3	3	31.4	3.46	1.5e-06	20615.9	HOMO SAPIENS	RT11_HUMAN 28S ribosomal protein S11, mitochondrial
5491	hIP190-12	hIP190-012	MePCE	[101]		Q92552	3	3	13	3.58	2.3e-06	47611.8	HOMO SAPIENS	RT27_HUMAN 28S ribosomal protein S27, mitochondrial
5492	hIP190-12	hIP190-012	MePCE	[102]		P62854	3	3	33.9	3.99	8.1e-07	13015.5	HOMO SAPIENS	RS26_HUMAN 40S ribosomal protein S26
5493	hIP190-12	hIP190-012	MePCE	[103]		Q12906	4	5	7.4	2.82	4.4e-05	95339.2	HOMO SAPIENS	ILF3_HUMAN Interleukin enhancer-binding factor 3
5494	hIP190-12	hIP190-012	MePCE	[104]		P78371	4	4	12	2.37	7.4e-05	57488.7	HOMO SAPIENS	TCPB_HUMAN T-complex protein 1 subunit beta
5495	hIP190-12	hIP190-012	MePCE	[105]		Q9Y3D9	5	5	30	2.3	1.1e-05	21770.8	HOMO SAPIENS	RT23_HUMAN 28S ribosomal protein S23, mitochondrial
5496	hIP190-12	hIP190-012	MePCE	[106]		Q9Y676	3	3	26.7	2.94	1.8e-05	29395.8	HOMO SAPIENS	RT18B_HUMAN 28S ribosomal protein S18b, mitochondrial
5497	hIP190-12	hIP190-012	MePCE	[107]		P82675	3	3	9.5	3.3	4.9e-07	48006.9	HOMO SAPIENS	RT05_HUMAN 28S ribosomal protein S5, mitochondrial
5498	hIP190-12	hIP190-012	MePCE	[108]		P35232	4	4	16.9	2.56	3.5e-05	29804.3	HOMO SAPIENS	PHB_HUMAN Prohibitin
5499	hIP190-12	hIP190-012	MePCE	[109]		O95777	4	5	63.5	2.44	3.1e-05	10402.7	HOMO SAPIENS	NAA38_HUMAN N-alpha-acetyltransferase 38, NatC auxiliary subunit
5500	hIP190-12	hIP190-012	MePCE	[110]		P63173	4	5	48.6	2.6	4.6e-05	8218	HOMO SAPIENS	RL38_HUMAN 60S ribosomal protein L38
5501	hIP190-12	hIP190-012	MePCE	[111]		P07900	3	4	5.7	3.46	1e-06	84660.4	HOMO SAPIENS	HS90A_HUMAN Heat shock protein HSP 90-alpha
5502	hIP190-12	hIP190-012	MePCE	[111-1]	0	P08238	2	3	4.3	3.46	1e-06	83264.9	HOMO SAPIENS	HS90B_HUMAN Heat shock protein HSP 90-beta
5503	hIP190-12	hIP190-012	MePCE	[111-2]	0	Q14568	2	3	9	3.46	1e-06	39365.1	HOMO SAPIENS	HS902_HUMAN Putative heat shock protein HSP 90-alpha A2
5504	hIP190-12	hIP190-012	MePCE	[112]		P46776	3	5	22.3	2.87	8.2e-06	16561.5	HOMO SAPIENS	RL27A_HUMAN 60S ribosomal protein L27a
5505	hIP190-12	hIP190-012	MePCE	[113]		P62847	4	5	20.3	2.93	2.4e-06	15423.3	HOMO SAPIENS	RS24_HUMAN 40S ribosomal protein S24
5506	hIP190-12	hIP190-012	MePCE	[114]		P0C0S8	3	6	30	3.13	5.2e-06	14091.6	HOMO SAPIENS	H2A1_HUMAN Histone H2A type 1
5507	hIP190-12	hIP190-012	MePCE	[114-1]	0	P20671	3	6	30	3.13	5.2e-06	14107.6	HOMO SAPIENS	H2A1D_HUMAN Histone H2A type 1-D
5508	hIP190-12	hIP190-012	MePCE	[114-2]	0	Q16777	3	6	30.2	3.13	5.2e-06	13988.5	HOMO SAPIENS	H2A2C_HUMAN Histone H2A type 2-C
5509	hIP190-12	hIP190-012	MePCE	[114-3]	0	Q6FI13	3	6	30	3.13	5.2e-06	14095.6	HOMO SAPIENS	H2A2A_HUMAN Histone H2A type 2-A
5510	hIP190-12	hIP190-012	MePCE	[114-4]	0	Q96KK5	3	6	30.5	3.13	5.2e-06	13906.4	HOMO SAPIENS	H2A1H_HUMAN Histone H2A type 1-H
5511	hIP190-12	hIP190-012	MePCE	[114-5]	0	Q99878	3	6	30.5	3.13	5.2e-06	13936.4	HOMO SAPIENS	H2A1J_HUMAN Histone H2A type 1-J
5512	hIP190-12	hIP190-012	MePCE	[114-6]	0	Q9BTM1	3	6	30.2	3.13	5.2e-06	14019.5	HOMO SAPIENS	H2AJ_HUMAN Histone H2A.J
5513	hIP190-12	hIP190-012	MePCE	[114-7]	0	P04908	2	5	21.5	3.13	5.2e-06	14135.6	HOMO SAPIENS	H2A1B_HUMAN Histone H2A type 1-B/E
5514	hIP190-12	hIP190-012	MePCE	[114-8]	0	Q7L7L0	2	5	21.5	3.13	5.2e-06	14121.6	HOMO SAPIENS	H2A3_HUMAN Histone H2A type 3
5515	hIP190-12	hIP190-012	MePCE	[114-9]	0	Q93077	2	5	21.5	3.13	5.2e-06	14105.6	HOMO SAPIENS	H2A1C_HUMAN Histone H2A type 1-C
5516	hIP190-12	hIP190-012	MePCE	[114-10]	0	P0C0S5	1	3	7	0.86	0.0055	13552.8	HOMO SAPIENS	H2AZ_HUMAN Histone H2A.Z
5517	hIP190-12	hIP190-012	MePCE	[114-11]	0	P16104	1	3	6.3	0.86	0.0055	15144.7	HOMO SAPIENS	H2AX_HUMAN Histone H2A.x
5518	hIP190-12	hIP190-012	MePCE	[114-12]	0	Q71UI9	1	3	7	0.86	0.0055	13508.8	HOMO SAPIENS	H2AV_HUMAN Histone H2A.V
5519	hIP190-12	hIP190-012	MePCE	[114-13]	0	Q8IUE6	1	3	6.9	0.86	0.0055	13995.4	HOMO SAPIENS	H2A2B_HUMAN Histone H2A type 2-B
5520	hIP190-12	hIP190-012	MePCE	[114-14]	0	Q96QV6	1	3	6.9	0.86	0.0055	14233.6	HOMO SAPIENS	H2A1A_HUMAN Histone H2A type 1-A
5521	hIP190-12	hIP190-012	MePCE	[115]		P68400	5	5	20.7	1.87	7.2e-05	45144	HOMO SAPIENS	CSK21_HUMAN Casein kinase II subunit alpha
5522	hIP190-12	hIP190-012	MePCE	[116]		P46777	7	9	27.9	1.34	0.00042	34362.9	HOMO SAPIENS	RL5_HUMAN 60S ribosomal protein L5
5523	hIP190-12	hIP190-012	MePCE	[117]		Q9Y2R9	4	4	24.4	2.03	0.00029	28134.3	HOMO SAPIENS	RT07_HUMAN 28S ribosomal protein S7, mitochondrial
5524	hIP190-12	hIP190-012	MePCE	[118]		P84098	3	5	13.8	2.59	3.9e-05	23466.2	HOMO SAPIENS	RL19_HUMAN 60S ribosomal protein L19
5525	hIP190-12	hIP190-012	MePCE	[119]		Q96DC7	3	3	11	2.88	6.4e-05	54442.6	HOMO SAPIENS	TMCO6_HUMAN Transmembrane and coiled-coil domain-containing protein 6
5526	hIP190-12	hIP190-012	MePCE	[120]		Q12905	3	4	9.5	2.99	1.1e-05	43062.5	HOMO SAPIENS	ILF2_HUMAN Interleukin enhancer-binding factor 2
5527	hIP190-12	hIP190-012	MePCE	[121]		Q99832	5	5	11	1.72	0.00036	59367.2	HOMO SAPIENS	TCPH_HUMAN T-complex protein 1 subunit eta
5528	hIP190-12	hIP190-012	MePCE	[122]		P06576	2	2	6.2	3.7	3.6e-06	56560.4	HOMO SAPIENS	ATPB_HUMAN ATP synthase subunit beta, mitochondrial
5529	hIP190-12	hIP190-012	MePCE	[123]		O60783	2	2	18.8	4.06	3e-07	15138.9	HOMO SAPIENS	RT14_HUMAN 28S ribosomal protein S14, mitochondrial
5530	hIP190-12	hIP190-012	MePCE	[124]		P62244	4	4	35.4	2.25	0.00012	14839.6	HOMO SAPIENS	RS15A_HUMAN 40S ribosomal protein S15a
5531	hIP190-12	hIP190-012	MePCE	[125]		P18621	3	4	19	2.35	0.00045	21397.2	HOMO SAPIENS	RL17_HUMAN 60S ribosomal protein L17
5532	hIP190-12	hIP190-012	MePCE	[126]		P62899	4	8	32	1.72	0.003	14463	HOMO SAPIENS	RL31_HUMAN 60S ribosomal protein L31
5533	hIP190-12	hIP190-012	MePCE	[127]		Q99575	5	5	7.1	1.84	0.00011	114710	HOMO SAPIENS	POP1_HUMAN Ribonucleases P/MRP protein subunit POP1
5534	hIP190-12	hIP190-012	MePCE	[128]		P50914	2	2	10.7	4.04	6e-07	23432.1	HOMO SAPIENS	RL14_HUMAN 60S ribosomal protein L14
5535	hIP190-12	hIP190-012	MePCE	[129]		P12956	3	3	7.6	2.48	4.9e-05	69843.7	HOMO SAPIENS	XRCC6_HUMAN X-ray repair cross-complementing protein 6
5536	hIP190-12	hIP190-012	MePCE	[130]		Q92665	3	4	8.9	2.5	4.9e-06	45318.8	HOMO SAPIENS	RT31_HUMAN 28S ribosomal protein S31, mitochondrial
5537	hIP190-12	hIP190-012	MePCE	[131]		Q9NR30	6	6	13.2	1.45	0.0002	87345.1	HOMO SAPIENS	DDX21_HUMAN Nucleolar RNA helicase 2
5538	hIP190-12	hIP190-012	MePCE	[131-1]	0	Q9BQ39	1	1	2	1.12	0.00076	82565.7	HOMO SAPIENS	DDX50_HUMAN ATP-dependent RNA helicase DDX50
5539	hIP190-12	hIP190-012	MePCE	[132]		P18124	2	5	7.7	3.35	7.2e-05	29226	HOMO SAPIENS	RL7_HUMAN 60S ribosomal protein L7
5540	hIP190-12	hIP190-012	MePCE	[133]		Q07020	2	2	12.8	3.37	1.4e-06	21634.7	HOMO SAPIENS	RL18_HUMAN 60S ribosomal protein L18
5541	hIP190-12	hIP190-012	MePCE	[134]		P61254	5	6	23.4	1.5	0.001	17258.4	HOMO SAPIENS	RL26_HUMAN 60S ribosomal protein L26
5542	hIP190-12	hIP190-012	MePCE	[134-1]	0	Q9UNX3	4	5	17.9	1.5	0.001	17256.4	HOMO SAPIENS	RL26L_HUMAN 60S ribosomal protein L26-like 1
5543	hIP190-12	hIP190-012	MePCE	[135]		P26373	3	6	15.2	2.17	0.00016	24261.7	HOMO SAPIENS	RL13_HUMAN 60S ribosomal protein L13
5544	hIP190-12	hIP190-012	MePCE	[136]		P63220	3	4	44.6	2.63	2.3e-05	9111.5	HOMO SAPIENS	RS21_HUMAN 40S ribosomal protein S21
5545	hIP190-12	hIP190-012	MePCE	[137]		P10809	3	3	7.2	2.1	0.00014	61055.2	HOMO SAPIENS	CH60_HUMAN 60 kDa heat shock protein, mitochondrial
5546	hIP190-12	hIP190-012	MePCE	[138]		Q8NB15	3	3	27.5	2.16	0.00012	29427.9	HOMO SAPIENS	ZN511_HUMAN Zinc finger protein 511
5547	hIP190-12	hIP190-012	MePCE	[139]		P52815	2	2	11.1	3.17	2.3e-05	21348.4	HOMO SAPIENS	RM12_HUMAN 39S ribosomal protein L12, mitochondrial
5548	hIP190-12	hIP190-012	MePCE	[140]		P82673	3	3	20.1	1.93	0.00055	36844.6	HOMO SAPIENS	RT35_HUMAN 28S ribosomal protein S35, mitochondrial
5549	hIP190-12	hIP190-012	MePCE	[141]		P17987	4	4	9.9	1.52	0.00027	60344.1	HOMO SAPIENS	TCPA_HUMAN T-complex protein 1 subunit alpha
5550	hIP190-12	hIP190-012	MePCE	[142]		Q15393	4	4	4.4	1.99	2.7e-05	135578	HOMO SAPIENS	SF3B3_HUMAN Splicing factor 3B subunit 3
5551	hIP190-12	hIP190-012	MePCE	[143]		P62316	3	4	25.4	2.03	4.9e-05	13527	HOMO SAPIENS	SMD2_HUMAN Small nuclear ribonucleoprotein Sm D2
5552	hIP190-12	hIP190-012	MePCE	[144]		P60660	2	2	15.9	2.74	2.5e-06	16930.2	HOMO SAPIENS	MYL6_HUMAN Myosin light polypeptide 6
5553	hIP190-12	hIP190-012	MePCE	[144-1]	0	P14649	1	1	5.3	2.74	2.5e-06	22764.2	HOMO SAPIENS	MYL6B_HUMAN Myosin light chain 6B
5554	hIP190-12	hIP190-012	MePCE	[145]		Q01844	2	2	5.8	2.87	6.1e-06	68478.8	HOMO SAPIENS	EWS_HUMAN RNA-binding protein EWS
5555	hIP190-12	hIP190-012	MePCE	[146]		P47914	1	1	9.4	4.76	2.8e-08	17752.2	HOMO SAPIENS	RL29_HUMAN 60S ribosomal protein L29
5556	hIP190-12	hIP190-012	MePCE	[147]		Q9Y2Q9	3	3	10.7	1.66	0.0014	20843	HOMO SAPIENS	RT28_HUMAN 28S ribosomal protein S28, mitochondrial
5557	hIP190-12	hIP190-012	MePCE	[148]		P49458	4	4	46.5	1.51	0.00048	10111.8	HOMO SAPIENS	SRP09_HUMAN Signal recognition particle 9 kDa protein
5558	hIP190-12	hIP190-012	MePCE	[149]		P49368	2	2	4	2.63	2.6e-05	60534.5	HOMO SAPIENS	TCPG_HUMAN T-complex protein 1 subunit gamma
5559	hIP190-12	hIP190-012	MePCE	[150]		P60866	2	3	22.7	2.73	1.1e-05	13372.8	HOMO SAPIENS	RS20_HUMAN 40S ribosomal protein S20
5560	hIP190-12	hIP190-012	MePCE	[151]		P27348	2	2	9.4	2.83	5.1e-06	27764.5	HOMO SAPIENS	1433T_HUMAN 14-3-3 protein theta
5561	hIP190-12	hIP190-012	MePCE	[152]		P82921	1	1	16.1	4.47	1e-07	10741.7	HOMO SAPIENS	RT21_HUMAN 28S ribosomal protein S21, mitochondrial
5562	hIP190-12	hIP190-012	MePCE	[153]		P35268	2	2	30.5	2.52	2.9e-05	14787.1	HOMO SAPIENS	RL22_HUMAN 60S ribosomal protein L22
5563	hIP190-12	hIP190-012	MePCE	[154]		O60563	2	2	5.2	2.54	2.8e-05	80685.3	HOMO SAPIENS	CCNT1_HUMAN Cyclin-T1
5564	hIP190-12	hIP190-012	MePCE	[155]		Q99733	3	3	10.4	1.69	0.00026	42823.8	HOMO SAPIENS	NP1L4_HUMAN Nucleosome assembly protein 1-like 4
5565	hIP190-12	hIP190-012	MePCE	[156]		Q7Z2W4	1	1	1.7	4.07	1.9e-07	101432	HOMO SAPIENS	ZCCHV_HUMAN Zinc finger CCCH-type antiviral protein 1
5566	hIP190-12	hIP190-012	MePCE	[157]		P61353	4	5	30.1	1.22	0.0023	15797.9	HOMO SAPIENS	RL27_HUMAN 60S ribosomal protein L27
5567	hIP190-12	hIP190-012	MePCE	[158]		P62318	1	2	16.7	4.02	5e-07	13916.4	HOMO SAPIENS	SMD3_HUMAN Small nuclear ribonucleoprotein Sm D3
5568	hIP190-12	hIP190-012	MePCE	[159]		P62304	3	3	29.3	1.59	0.00072	10803.7	HOMO SAPIENS	RUXE_HUMAN Small nuclear ribonucleoprotein E
5569	hIP190-12	hIP190-012	MePCE	[160]		P05141	1	1	4.4	3.95	4.5e-08	32852.5	HOMO SAPIENS	ADT2_HUMAN ADP/ATP translocase 2
5570	hIP190-12	hIP190-012	MePCE	[161]		P32969	2	2	16.7	2.22	0.0003	21863.6	HOMO SAPIENS	RL9_HUMAN 60S ribosomal protein L9
5571	hIP190-12	hIP190-012	MePCE	[162]		P62273	3	4	35.7	1.68	0.00026	6676.8	HOMO SAPIENS	RS29_HUMAN 40S ribosomal protein S29
5572	hIP190-12	hIP190-012	MePCE	[163]		Q13263	2	2	6.7	2.1	0.00025	88550.5	HOMO SAPIENS	TIF1B_HUMAN Transcription intermediary factor 1-beta
5573	hIP190-12	hIP190-012	MePCE	[164]		Q00577	2	2	28	2.22	7.6e-05	34911	HOMO SAPIENS	PURA_HUMAN Transcriptional activator protein Pur-alpha
5574	hIP190-12	hIP190-012	MePCE	[165]		Q9BYN8	4	4	18.5	1.23	0.0015	24211.9	HOMO SAPIENS	RT26_HUMAN 28S ribosomal protein S26, mitochondrial
5575	hIP190-12	hIP190-012	MePCE	[166]		P13010	2	2	5.6	2.29	5.6e-06	82705.3	HOMO SAPIENS	XRCC5_HUMAN X-ray repair cross-complementing protein 5
5576	hIP190-12	hIP190-012	MePCE	[167]		P83881	3	5	24.5	1.61	0.00033	12440.9	HOMO SAPIENS	RL36A_HUMAN 60S ribosomal protein L36a
5577	hIP190-12	hIP190-012	MePCE	[167-1]	0	Q969Q0	2	4	15.1	1.02	0.0023	12469	HOMO SAPIENS	RL36L_HUMAN 60S ribosomal protein L36a-like
5578	hIP190-12	hIP190-012	MePCE	[168]		P23528	2	2	14.5	2.15	1.6e-05	18502.7	HOMO SAPIENS	COF1_HUMAN Cofilin-1
5579	hIP190-12	hIP190-012	MePCE	[168-1]	0	Q9Y281	1	1	6.6	2.07	1.6e-05	18736.8	HOMO SAPIENS	COF2_HUMAN Cofilin-2
5580	hIP190-12	hIP190-012	MePCE	[169]		P49207	3	3	21.4	1.34	0.00083	13293.1	HOMO SAPIENS	RL34_HUMAN 60S ribosomal protein L34
5581	hIP190-12	hIP190-012	MePCE	[170]		Q9C0C9	4	4	5.4	1.15	0.0011	141295	HOMO SAPIENS	UBE2O_HUMAN Ubiquitin-conjugating enzyme E2 O
5582	hIP190-12	hIP190-012	MePCE	[171]		P01614	1	2	11.3	3.33	3.9e-07	12676.4	HOMO SAPIENS	KV201_HUMAN Ig kappa chain V-II region Cum
5583	hIP190-12	hIP190-012	MePCE	[171-1]	0	P01617	1	2	11.5	3.33	3.9e-07	12317	HOMO SAPIENS	KV204_HUMAN Ig kappa chain V-II region TEW
5584	hIP190-12	hIP190-012	MePCE	[171-2]	0	P06309	1	2	11.1	3.33	3.9e-07	12664.3	HOMO SAPIENS	KV205_HUMAN Ig kappa chain V-II region GM607 (Fragment)
5585	hIP190-12	hIP190-012	MePCE	[171-3]	0	P06310	1	2	9.8	3.33	3.9e-07	14706.8	HOMO SAPIENS	KV206_HUMAN Ig kappa chain V-II region RPMI 6410
5586	hIP190-12	hIP190-012	MePCE	[172]		P84090	1	1	11.5	3.32	9.5e-08	12259.1	HOMO SAPIENS	ERH_HUMAN Enhancer of rudimentary homolog
5587	hIP190-12	hIP190-012	MePCE	[173]		Q9Y5A9	2	2	4.3	1.81	0.00045	62334.7	HOMO SAPIENS	YTHD2_HUMAN YTH domain family protein 2
5588	hIP190-12	hIP190-012	MePCE	[174]		P55084	2	2	5.5	1.65	0.0005	51294.9	HOMO SAPIENS	ECHB_HUMAN Trifunctional enzyme subunit beta, mitochondrial
5589	hIP190-12	hIP190-012	MePCE	[175]		Q8ND56	2	2	18.6	1.65	0.0092	50530.2	HOMO SAPIENS	LS14A_HUMAN Protein LSM14 homolog A
5590	hIP190-12	hIP190-012	MePCE	[176]		P52272	3	3	4.5	1.55	9.8e-05	77516.4	HOMO SAPIENS	HNRPM_HUMAN Heterogeneous nuclear ribonucleoprotein M
5591	hIP190-12	hIP190-012	MePCE	[177]		Q13200	1	1	1.3	3.24	7.5e-07	100201	HOMO SAPIENS	PSMD2_HUMAN 26S proteasome non-ATPase regulatory subunit 2
5592	hIP190-12	hIP190-012	MePCE	[178]		P82914	4	4	15.6	1.09	0.00071	29842.4	HOMO SAPIENS	RT15_HUMAN 28S ribosomal protein S15, mitochondrial
5593	hIP190-12	hIP190-012	MePCE	[179]		Q15029	2	2	4.5	1.74	0.0056	109437	HOMO SAPIENS	U5S1_HUMAN 116 kDa U5 small nuclear ribonucleoprotein component
5594	hIP190-12	hIP190-012	MePCE	[180]		P55036	3	3	10.3	1.46	9.3e-05	40737	HOMO SAPIENS	PSMD4_HUMAN 26S proteasome non-ATPase regulatory subunit 4
5595	hIP190-12	hIP190-012	MePCE	[181]		Q96F45	2	2	7.9	1.64	0.0032	62555.3	HOMO SAPIENS	ZN503_HUMAN Zinc finger protein 503
5596	hIP190-12	hIP190-012	MePCE	[182]		Q9Y399	2	2	7.1	1.8	6.8e-05	33249.5	HOMO SAPIENS	RT02_HUMAN 28S ribosomal protein S2, mitochondrial
5597	hIP190-12	hIP190-012	MePCE	[183]		P61513	1	1	19.6	2.97	1.9e-06	10275.4	HOMO SAPIENS	RL37A_HUMAN 60S ribosomal protein L37a
5598	hIP190-12	hIP190-012	MePCE	[184]		P42766	2	3	18.7	1.51	0.00095	14551.6	HOMO SAPIENS	RL35_HUMAN 60S ribosomal protein L35
5599	hIP190-12	hIP190-012	MePCE	[185]		Q13595	1	1	5	2.88	6.2e-06	32688.9	HOMO SAPIENS	TRA2A_HUMAN Transformer-2 protein homolog alpha
5600	hIP190-12	hIP190-012	MePCE	[186]		P25705	3	3	6.3	1.3	0.00052	59751.1	HOMO SAPIENS	ATPA_HUMAN ATP synthase subunit alpha, mitochondrial
5601	hIP190-12	hIP190-012	MePCE	[187]		P62906	2	3	9.7	1.43	0.0021	24831.5	HOMO SAPIENS	RL10A_HUMAN 60S ribosomal protein L10a
5602	hIP190-12	hIP190-012	MePCE	[188]		P62314	2	3	28.6	1.64	0.00049	13281.7	HOMO SAPIENS	SMD1_HUMAN Small nuclear ribonucleoprotein Sm D1
5603	hIP190-12	hIP190-012	MePCE	[189]		P31943	2	2	6.9	1.5	0.00026	49229.9	HOMO SAPIENS	HNRH1_HUMAN Heterogeneous nuclear ribonucleoprotein H
5604	hIP190-12	hIP190-012	MePCE	[189-1]	1	P55795	2	2	6.9	1.5	0.00026	49264	HOMO SAPIENS	HNRH2_HUMAN Heterogeneous nuclear ribonucleoprotein H2
5605	hIP190-12	hIP190-012	MePCE	[189-2]	1	P52597	2	2	6.3	1.38	0.00026	45672.3	HOMO SAPIENS	HNRPF_HUMAN Heterogeneous nuclear ribonucleoprotein F
5606	hIP190-12	hIP190-012	MePCE	[190]		O00571	3	3	6	1.04	0.0061	73244	HOMO SAPIENS	DDX3X_HUMAN ATP-dependent RNA helicase DDX3X
5607	hIP190-12	hIP190-012	MePCE	[190-1]	0	O15523	3	3	6.1	1.04	0.0061	73154.2	HOMO SAPIENS	DDX3Y_HUMAN ATP-dependent RNA helicase DDX3Y
5608	hIP190-12	hIP190-012	MePCE	[191]		Q04837	1	1	10.1	2.65	7.6e-06	17259.8	HOMO SAPIENS	SSBP_HUMAN Single-stranded DNA-binding protein, mitochondrial
5609	hIP190-12	hIP190-012	MePCE	[192]		Q86V81	1	1	9.7	2.63	2.7e-05	26888.1	HOMO SAPIENS	THOC4_HUMAN THO complex subunit 4
5610	hIP190-12	hIP190-012	MePCE	[193]		Q99729	1	1	3.9	2.6	1.8e-05	36225.2	HOMO SAPIENS	ROAA_HUMAN Heterogeneous nuclear ribonucleoprotein A/B
5611	hIP190-12	hIP190-012	MePCE	[194]		P55769	1	1	9.4	2.6	1.9e-05	14173.7	HOMO SAPIENS	NH2L1_HUMAN NHP2-like protein 1
5612	hIP190-12	hIP190-012	MePCE	[195]		P23284	2	2	12	1.69	9.6e-05	23742.7	HOMO SAPIENS	PPIB_HUMAN Peptidyl-prolyl cis-trans isomerase B
5613	hIP190-12	hIP190-012	MePCE	[196]		Q92769	1	1	3.9	2.54	8e-05	55364.7	HOMO SAPIENS	HDAC2_HUMAN Histone deacetylase 2
5614	hIP190-12	hIP190-012	MePCE	[197]		Q9UNN5	3	3	6.6	1.04	0.0013	73954.8	HOMO SAPIENS	FAF1_HUMAN FAS-associated factor 1
5615	hIP190-12	hIP190-012	MePCE	[198]		Q09161	2	2	3.9	1.31	0.0011	91840.3	HOMO SAPIENS	NCBP1_HUMAN Nuclear cap-binding protein subunit 1
5616	hIP190-12	hIP190-012	MePCE	[199]		P57721	1	1	3	2.17	6.9e-05	39465.6	HOMO SAPIENS	PCBP3_HUMAN Poly(rC)-binding protein 3
5617	hIP190-12	hIP190-012	MePCE	[199-1]	0	Q15365	1	1	3.1	2.17	6.9e-05	37498.2	HOMO SAPIENS	PCBP1_HUMAN Poly(rC)-binding protein 1
5618	hIP190-12	hIP190-012	MePCE	[199-2]	0	Q15366	1	1	3	2.17	6.9e-05	38580.4	HOMO SAPIENS	PCBP2_HUMAN Poly(rC)-binding protein 2
5619	hIP190-12	hIP190-012	MePCE	[200]		Q9Y4Y9	1	1	22	2.14	1.9e-05	9937.6	HOMO SAPIENS	LSM5_HUMAN U6 snRNA-associated Sm-like protein LSm5
5620	hIP190-12	hIP190-012	MePCE	[201]		Q15233	1	1	3.2	2.12	1.5e-05	54232	HOMO SAPIENS	NONO_HUMAN Non-POU domain-containing octamer-binding protein
5621	hIP190-12	hIP190-012	MePCE	[202]		P62306	1	1	15.1	2.08	2.7e-05	9725.3	HOMO SAPIENS	RUXF_HUMAN Small nuclear ribonucleoprotein F
5622	hIP190-12	hIP190-012	MePCE	[203]		P14678	2	3	14.6	1.05	0.0027	24610.3	HOMO SAPIENS	RSMB_HUMAN Small nuclear ribonucleoprotein-associated proteins B and B'
5623	hIP190-12	hIP190-012	MePCE	[203-1]	0	P63162	2	3	14.6	1.05	0.0027	24614.3	HOMO SAPIENS	RSMN_HUMAN Small nuclear ribonucleoprotein-associated protein N
5624	hIP190-12	hIP190-012	MePCE	[204]		Q9H0D6	1	1	1.3	2.04	1.7e-05	108583	HOMO SAPIENS	XRN2_HUMAN 5'-3' exoribonuclease 2
5625	hIP190-12	hIP190-012	MePCE	[205]		Q9Y4Z0	2	3	26.6	1.05	0.008	15349.9	HOMO SAPIENS	LSM4_HUMAN U6 snRNA-associated Sm-like protein LSm4
5626	hIP190-12	hIP190-012	MePCE	[206]		P82932	2	2	23.2	1.06	0.0014	14226.7	HOMO SAPIENS	RT06_HUMAN 28S ribosomal protein S6, mitochondrial
5627	hIP190-12	hIP190-012	MePCE	[207]		P24534	1	1	5.8	1.86	4e-05	24763.9	HOMO SAPIENS	EF1B_HUMAN Elongation factor 1-beta
5628	hIP190-12	hIP190-012	MePCE	[208]		P30049	1	1	8.3	1.85	4.7e-05	17490.1	HOMO SAPIENS	ATPD_HUMAN ATP synthase subunit delta, mitochondrial
5629	hIP190-12	hIP190-012	MePCE	[209]		P62995	1	1	5.6	1.78	9.5e-05	33665.9	HOMO SAPIENS	TRA2B_HUMAN Transformer-2 protein homolog beta
5630	hIP190-12	hIP190-012	MePCE	[210]		P61313	2	2	11.3	1.08	0.0012	24146.3	HOMO SAPIENS	RL15_HUMAN 60S ribosomal protein L15
5631	hIP190-12	hIP190-012	MePCE	[211]		Q9BYD1	1	1	8.4	1.66	0.00019	20692.1	HOMO SAPIENS	RM13_HUMAN 39S ribosomal protein L13, mitochondrial
5632	hIP190-12	hIP190-012	MePCE	[212]		P58557	1	1	6.6	1.45	0.0021	19298.3	HOMO SAPIENS	YBEY_HUMAN rRNA maturation factor homolog
5633	hIP190-12	hIP190-012	MePCE	[213]		P46778	1	1	6.9	1.43	5.4e-05	18565	HOMO SAPIENS	RL21_HUMAN 60S ribosomal protein L21
5634	hIP190-12	hIP190-012	MePCE	[214]		P62310	1	1	11.8	1.42	0.00028	11845.5	HOMO SAPIENS	LSM3_HUMAN U6 snRNA-associated Sm-like protein LSm3
5635	hIP190-12	hIP190-012	MePCE	[215]		Q9UMS4	2	2	11.7	0.77	0.0056	55181.3	HOMO SAPIENS	PRP19_HUMAN Pre-mRNA-processing factor 19
5636	hIP190-12	hIP190-012	MePCE	[216]		Q16540	1	1	9.8	1.38	0.00013	17781.3	HOMO SAPIENS	RM23_HUMAN 39S ribosomal protein L23, mitochondrial
5637	hIP190-12	hIP190-012	MePCE	[217]		Q01081	1	1	7.5	1.37	0.00069	27872.3	HOMO SAPIENS	U2AF1_HUMAN Splicing factor U2AF 35 kDa subunit
5638	hIP190-12	hIP190-012	MePCE	[218]		P61163	1	1	5.9	1.36	0.0025	42614.1	HOMO SAPIENS	ACTZ_HUMAN Alpha-centractin
5639	hIP190-12	hIP190-012	MePCE	[219]		P62633	1	1	7.9	1.35	0.00029	19462.9	HOMO SAPIENS	CNBP_HUMAN Cellular nucleic acid-binding protein
5640	hIP190-12	hIP190-012	MePCE	[220]		Q9NY25	1	1	17.6	1.33	0.0094	21521.7	HOMO SAPIENS	CLC5A_HUMAN C-type lectin domain family 5 member A
5641	hIP190-12	hIP190-012	MePCE	[221]		Q9H3K6	1	2	18.6	1.32	0.0018	10116.6	HOMO SAPIENS	BOLA2_HUMAN BolA-like protein 2
5642	hIP190-12	hIP190-012	MePCE	[222]		P09661	2	2	9.8	0.81	0.00096	28415.8	HOMO SAPIENS	RU2A_HUMAN U2 small nuclear ribonucleoprotein A'
5643	hIP190-12	hIP190-012	MePCE	[223]		Q15717	1	1	3.4	1.29	0.00045	36092.2	HOMO SAPIENS	ELAV1_HUMAN ELAV-like protein 1
5644	hIP190-12	hIP190-012	MePCE	[224]		O15355	1	2	2	1.23	0.0011	59272.1	HOMO SAPIENS	PPM1G_HUMAN Protein phosphatase 1G
5645	hIP190-12	hIP190-012	MePCE	[225]		P25788	1	1	4.7	1.2	0.00081	28433.5	HOMO SAPIENS	PSA3_HUMAN Proteasome subunit alpha type-3
5646	hIP190-12	hIP190-012	MePCE	[226]		P40429	3	3	14.8	0.54	0.0047	23577.4	HOMO SAPIENS	RL13A_HUMAN 60S ribosomal protein L13a
5647	hIP190-12	hIP190-012	MePCE	[226-1]	0	Q6NVV1	2	2	21.6	0.54	0.0047	12134.7	HOMO SAPIENS	R13AX_HUMAN Putative 60S ribosomal protein L13a-like MGC87657
5648	hIP190-12	hIP190-012	MePCE	[227]		Q16643	1	1	4.3	1.13	0.0044	71429.9	HOMO SAPIENS	DREB_HUMAN Drebrin
5649	hIP190-12	hIP190-012	MePCE	[228]		A5A3E0	1	1	0.9	1.12	0.0027	121446	HOMO SAPIENS	POTEF_HUMAN POTE ankyrin domain family member F
5650	hIP190-12	hIP190-012	MePCE	[228-1]	0	P0CG38	1	1	0.9	1.12	0.0027	121284	HOMO SAPIENS	POTEI_HUMAN POTE ankyrin domain family member I
5651	hIP190-12	hIP190-012	MePCE	[228-2]	0	P0CG39	1	1	1	1.12	0.0027	117391	HOMO SAPIENS	POTEJ_HUMAN POTE ankyrin domain family member J
5652	hIP190-12	hIP190-012	MePCE	[228-3]	0	P60709	1	1	2.7	1.12	0.0027	41737.1	HOMO SAPIENS	ACTB_HUMAN Actin, cytoplasmic 1
5653	hIP190-12	hIP190-012	MePCE	[228-4]	0	P62736	1	1	2.7	1.12	0.0027	42009.4	HOMO SAPIENS	ACTA_HUMAN Actin, aortic smooth muscle
5654	hIP190-12	hIP190-012	MePCE	[228-5]	0	P63261	1	1	2.7	1.12	0.0027	41793.2	HOMO SAPIENS	ACTG_HUMAN Actin, cytoplasmic 2
5655	hIP190-12	hIP190-012	MePCE	[228-6]	0	P63267	1	1	2.7	1.12	0.0027	41877.3	HOMO SAPIENS	ACTH_HUMAN Actin, gamma-enteric smooth muscle
5656	hIP190-12	hIP190-012	MePCE	[228-7]	0	P68032	1	1	2.7	1.12	0.0027	42019.4	HOMO SAPIENS	ACTC_HUMAN Actin, alpha cardiac muscle 1
5657	hIP190-12	hIP190-012	MePCE	[228-8]	0	P68133	1	1	2.7	1.12	0.0027	42051.4	HOMO SAPIENS	ACTS_HUMAN Actin, alpha skeletal muscle
5658	hIP190-12	hIP190-012	MePCE	[228-9]	0	Q6S8J3	1	1	0.9	1.12	0.0027	121365	HOMO SAPIENS	POTEE_HUMAN POTE ankyrin domain family member E
5659	hIP190-12	hIP190-012	MePCE	[229]		Q9Y3U8	2	2	18.1	0.66	0.0038	12253.8	HOMO SAPIENS	RL36_HUMAN 60S ribosomal protein L36
5660	hIP190-12	hIP190-012	MePCE	[230]		O94952	1	1	3.7	1.1	0.0033	72270.7	HOMO SAPIENS	FBX21_HUMAN F-box only protein 21
5661	hIP190-12	hIP190-012	MePCE	[231]		Q13405	1	1	7.8	1.06	0.00051	19198.2	HOMO SAPIENS	RM49_HUMAN 39S ribosomal protein L49, mitochondrial
5662	hIP190-12	hIP190-012	MePCE	[232]		P38159	1	1	3.3	1.06	0.0031	42332.2	HOMO SAPIENS	RBMX_HUMAN RNA-binding motif protein, X chromosome
5663	hIP190-12	hIP190-012	MePCE	[232-1]	0	Q96E39	1	1	3.3	1.06	0.0031	42141.9	HOMO SAPIENS	RMXL1_HUMAN RNA binding motif protein, X-linked-like-1
5664	hIP190-12	hIP190-012	MePCE	[233]		P82663	1	1	7.5	0.99	0.00049	20116.6	HOMO SAPIENS	RT25_HUMAN 28S ribosomal protein S25, mitochondrial
5665	hIP190-12	hIP190-012	MePCE	[234]		decoy	1	2	1.8	0.94	0.002	93611.4	HOMO SAPIENS	DISC1_HUMAN Disrupted in schizophrenia 1 protein
5666	hIP190-12	hIP190-012	MePCE	[235]		Q9Y3D3	1	1	13.1	0.93	0.0039	15345	HOMO SAPIENS	RT16_HUMAN 28S ribosomal protein S16, mitochondrial
5667	hIP190-12	hIP190-012	MePCE	[236]		O14818	1	1	6	0.87	0.00054	27887.1	HOMO SAPIENS	PSA7_HUMAN Proteasome subunit alpha type-7
5668	hIP190-12	hIP190-012	MePCE	[237]		P98179	1	1	6.4	0.8	0.0045	17170.5	HOMO SAPIENS	RBM3_HUMAN Putative RNA-binding protein 3
5669	hIP190-12	hIP190-012	MePCE	[238]		Q96EL2	1	1	7.2	0.77	0.0009	19015.3	HOMO SAPIENS	RT24_HUMAN 28S ribosomal protein S24, mitochondrial
5670	hIP190-12	hIP190-012	MePCE	[239]		Q9UHB9	1	1	2.1	0.76	0.00086	70730.2	HOMO SAPIENS	SRP68_HUMAN Signal recognition particle 68 kDa protein
5671	hIP190-12	hIP190-012	MePCE	[240]		O75607	1	1	9.6	0.75	0.00085	19343.9	HOMO SAPIENS	NPM3_HUMAN Nucleoplasmin-3
5672	hIP190-12	hIP190-012	MePCE	[241]		Q16531	2	2	3.5	0.51	0.0082	126969	HOMO SAPIENS	DDB1_HUMAN DNA damage-binding protein 1
5673	hIP190-12	hIP190-012	MePCE	[242]		Q96DG6	1	1	6.1	0.72	0.0027	28048.4	HOMO SAPIENS	CMBL_HUMAN Carboxymethylenebutenolidase homolog
5674	hIP190-12	hIP190-012	MePCE	[243]		O15226	1	1	3.3	0.72	0.0044	77673.6	HOMO SAPIENS	NKRF_HUMAN NF-kappa-B-repressing factor
5675	hIP190-12	hIP190-012	MePCE	[244]		P19474	1	1	2.1	0.71	0.0022	54170.2	HOMO SAPIENS	RO52_HUMAN E3 ubiquitin-protein ligase TRIM21
5676	hIP190-12	hIP190-012	MePCE	[245]		O14602	1	1	11.1	0.71	0.0097	16442.5	HOMO SAPIENS	IF1AY_HUMAN Eukaryotic translation initiation factor 1A, Y-chromosomal
5677	hIP190-12	hIP190-012	MePCE	[245-1]	0	P47813	1	1	11.1	0.71	0.0097	16460.5	HOMO SAPIENS	IF1AX_HUMAN Eukaryotic translation initiation factor 1A, X-chromosomal
5678	hIP190-12	hIP190-012	MePCE	[246]		O00487	1	1	4.2	0.7	0.0026	34577.4	HOMO SAPIENS	PSDE_HUMAN 26S proteasome non-ATPase regulatory subunit 14
5679	hIP190-12	hIP190-012	MePCE	[247]		Q96GC5	1	1	6.1	0.7	0.0026	23935	HOMO SAPIENS	RM48_HUMAN 39S ribosomal protein L48, mitochondrial
5680	hIP190-12	hIP190-012	MePCE	[248]		Q14331	1	1	5	0.68	0.0046	29172.6	HOMO SAPIENS	FRG1_HUMAN Protein FRG1
5681	hIP190-12	hIP190-012	MePCE	[249]		O95210	1	3	4.2	0.62	0.0031	39007.6	HOMO SAPIENS	STBD1_HUMAN Starch-binding domain-containing protein 1
5682	hIP190-12	hIP190-012	MePCE	[250]		Q6P161	1	1	7.2	0.62	0.0053	15819.3	HOMO SAPIENS	RM54_HUMAN 39S ribosomal protein L54, mitochondrial
5683	hIP190-12	hIP190-012	MePCE	[251]		P62312	1	1	13.8	0.59	0.0029	9127.7	HOMO SAPIENS	LSM6_HUMAN U6 snRNA-associated Sm-like protein LSm6
5684	hIP190-12	hIP190-012	MePCE	[252]		Q9NWU5	1	1	5.8	0.59	0.0014	23640.9	HOMO SAPIENS	RM22_HUMAN 39S ribosomal protein L22, mitochondrial
5685	hIP190-12	hIP190-012	MePCE	[253]		P40926	2	2	7.7	0.5	0.0013	35503.6	HOMO SAPIENS	MDHM_HUMAN Malate dehydrogenase, mitochondrial
5686	hIP190-12	hIP190-012	MePCE	[254]		P30405	1	1	14	0.57	0.0051	22040.4	HOMO SAPIENS	PPIF_HUMAN Peptidyl-prolyl cis-trans isomerase F, mitochondrial
5687	hIP190-12	hIP190-012	MePCE	[255]		Q99460	1	1	3.5	0.55	0.0039	105837	HOMO SAPIENS	PSMD1_HUMAN 26S proteasome non-ATPase regulatory subunit 1
5688	hIP190-12	hIP190-012	MePCE	[256]		Q14204	1	1	0.8	0.54	0.004	532412	HOMO SAPIENS	DYHC1_HUMAN Cytoplasmic dynein 1 heavy chain 1
5689	hIP190-12	hIP190-012	MePCE	[257]		P25106	1	1	4.1	0.54	0.0034	41493.2	HOMO SAPIENS	CXCR7_HUMAN C-X-C chemokine receptor type 7
5690	hIP190-12	hIP190-012	MePCE	[258]		decoy	1	1	2	0.46	0.0043	87565.8	HOMO SAPIENS	ZN287_HUMAN Zinc finger protein 287
5691	hIP190-12	hIP190-012	MePCE	[259]		P55884	1	1	1.2	0.38	0.0042	92482.4	HOMO SAPIENS	EIF3B_HUMAN Eukaryotic translation initiation factor 3 subunit B
5692	hIP190-12	hIP190-012	MePCE	[260]		Q8WZ42	1	1	0	0.37	0.0073	3.81617e+06	HOMO SAPIENS	TITIN_HUMAN Titin
5693	hIP190-12	hIP190-012	MePCE	[261]		P42677	1	1	15.5	0.37	0.0019	9461.2	HOMO SAPIENS	RS27_HUMAN 40S ribosomal protein S27
5694	hIP190-12	hIP190-012	MePCE	[261-1]	0	Q71UM5	1	1	15.5	0.37	0.0019	9477.3	HOMO SAPIENS	RS27L_HUMAN 40S ribosomal protein S27-like
5695	hIP190-12	hIP190-012	MePCE	[262]		decoy	1	1	0.2	0.36	0.0037	838315	HOMO SAPIENS	MACF1_HUMAN Microtubule-actin cross-linking factor 1, isoforms 1/2/3/5
5696	hIP190-12	hIP190-012	MePCE	[263]		Q7Z4Q2	1	1	2.2	0.35	0.0028	74583.4	HOMO SAPIENS	HEAT3_HUMAN HEAT repeat-containing protein 3
5697	hIP190-12	hIP190-012	MePCE	[264]		decoy	1	1	3.7	0.32	0.0079	39250.4	HOMO SAPIENS	CE060_HUMAN Putative uncharacterized protein C5orf60
5698	hIP190-12	hIP190-012	MePCE	[265]		P48047	1	1	5.2	0.29	0.0038	23277.5	HOMO SAPIENS	ATPO_HUMAN ATP synthase subunit O, mitochondrial
5699	hIP190-12	hIP190-012	MePCE	[266]		Q96HS1	1	1	3.5	0.28	0.0057	32004.7	HOMO SAPIENS	PGAM5_HUMAN Serine/threonine-protein phosphatase PGAM5, mitochondrial
5700	hIP190-12	hIP190-012	MePCE	[267]		P62891	1	1	19.6	0.26	0.0048	6406.7	HOMO SAPIENS	RL39_HUMAN 60S ribosomal protein L39
5701	hIP190-12	hIP190-012	MePCE	[267-1]	0	Q59GN2	1	1	19.6	0.26	0.0048	6322.7	HOMO SAPIENS	R39L5_HUMAN Putative 60S ribosomal protein L39-like 5
5702	hIP190-12	hIP190-012	MePCE	[268]		Q68DE3	1	1	0.8	0.26	0.0059	241683	HOMO SAPIENS	K2018_HUMAN Basic helix-loop-helix domain-containing protein KIAA2018
5703	hIP190-12	hIP190-012	MePCE	[269]		P40939	1	1	2	0.25	0.0067	83000.4	HOMO SAPIENS	ECHA_HUMAN Trifunctional enzyme subunit alpha, mitochondrial
5704	hIP190-12	hIP190-012	MePCE	[270]		Q9BZF9	1	1	1.8	0.25	0.0097	162507	HOMO SAPIENS	UACA_HUMAN Uveal autoantigen with coiled-coil domains and ankyrin repeats
5705	hIP190-12	hIP190-012	MePCE	[271]		decoy	1	1	1.6	0.13	0.0043	134343	HOMO SAPIENS	NALP5_HUMAN NACHT, LRR and PYD domains-containing protein 5
5706	hIP190-12	hIP190-012	MePCE	[273]		P62333	1	1	3.1	0.06	0.0069	44173.4	HOMO SAPIENS	PRS10_HUMAN 26S protease regulatory subunit 10B

## Sheet: MEPCE #2
	ID			Rank	Uniq Pep	Acc #	Num Unique	Peptide Count	% Cov	Best Disc Score	Best Expect Val	Protein MW	Species	Protein Name
8368	hIP191-14	hIP191-14	MePCE	[1]		Q15020	50	102	52.6	6.33	4e-10	109936	HOMO SAPIENS	SART3_HUMAN Squamous cell carcinoma antigen recognized by T-cells 3
8369	hIP191-14	hIP191-14	MePCE	[2]		Q4G0J3	35	60	50.2	5.32	7.4e-09	66899.2	HOMO SAPIENS	LARP7_HUMAN La-related protein 7
8370	hIP191-14	hIP191-14	MePCE	[3]		P04264	27	44	47.5	6.31	2.5e-11	66039.2	HOMO SAPIENS	K2C1_HUMAN Keratin, type II cytoskeletal 1
8371	hIP191-14	hIP191-14	MePCE	[3-1]	10	P35908	12	12	23.8	4.29	4.6e-07	65433.4	HOMO SAPIENS	K22E_HUMAN Keratin, type II cytoskeletal 2 epidermal
8372	hIP191-14	hIP191-14	MePCE	[3-2, 107-5]	2	P19013	3	3	6	2.15	0.00016	57285.7	HOMO SAPIENS	K2C4_HUMAN Keratin, type II cytoskeletal 4
8373	hIP191-14	hIP191-14	MePCE	[3-3]	0	Q7Z794	1	1	2.1	3.66	2.1e-05	61901.9	HOMO SAPIENS	K2C1B_HUMAN Keratin, type II cytoskeletal 1b
8374	hIP191-14	hIP191-14	MePCE	[3-4]	0	P05787	1	1	2.3	2.07	0.00016	53704.7	HOMO SAPIENS	K2C8_HUMAN Keratin, type II cytoskeletal 8
8375	hIP191-14	hIP191-14	MePCE	[3-5]	0	P08729	1	1	2.3	2.07	0.00016	51386.1	HOMO SAPIENS	K2C7_HUMAN Keratin, type II cytoskeletal 7
8376	hIP191-14	hIP191-14	MePCE	[3-6]	0	P14136	1	1	2.5	2.07	0.00016	49880.6	HOMO SAPIENS	GFAP_HUMAN Glial fibrillary acidic protein
8377	hIP191-14	hIP191-14	MePCE	[3-7]	0	Q6KB66	1	1	2.4	2.07	0.00016	50525.7	HOMO SAPIENS	K2C80_HUMAN Keratin, type II cytoskeletal 80
8378	hIP191-14	hIP191-14	MePCE	[4]		Q7L2J0	27	53	61	5.22	6.4e-09	74355.8	HOMO SAPIENS	MEPCE_HUMAN 7SK snRNA methylphosphate capping enzyme
8379	hIP191-14	hIP191-14	MePCE	[5]		P08107	23	35	50.5	5.1	5.3e-08	70052.8	HOMO SAPIENS	HSP71_HUMAN Heat shock 70 kDa protein 1A/1B
8380	hIP191-14	hIP191-14	MePCE	[5-1]	21	P11142	23	32	40.7	5.8	1.4e-09	70898.7	HOMO SAPIENS	HSP7C_HUMAN Heat shock cognate 71 kDa protein
8381	hIP191-14	hIP191-14	MePCE	[5-2]	1	P34931	11	19	25.1	4.25	1.3e-07	70375.6	HOMO SAPIENS	HS71L_HUMAN Heat shock 70 kDa protein 1-like
8382	hIP191-14	hIP191-14	MePCE	[5-3]	0	P17066	5	10	10.3	4.95	1.3e-07	71028.7	HOMO SAPIENS	HSP76_HUMAN Heat shock 70 kDa protein 6
8383	hIP191-14	hIP191-14	MePCE	[5-4, 62-1]	7	P54652	8	13	12.1	3.86	1.3e-07	70021.5	HOMO SAPIENS	HSP72_HUMAN Heat shock-related 70 kDa protein 2
8384	hIP191-14	hIP191-14	MePCE	[5-5]	0	P48741	3	7	11.2	3.76	1.3e-07	40244.8	HOMO SAPIENS	HSP77_HUMAN Putative heat shock 70 kDa protein 7
8385	hIP191-14	hIP191-14	MePCE	[6]		P05455	24	38	53.4	5.07	9.4e-08	46837.4	HOMO SAPIENS	LA_HUMAN Lupus La protein
8386	hIP191-14	hIP191-14	MePCE	[7]		Q86W50	20	28	45.2	4.91	6.2e-07	63621.6	HOMO SAPIENS	MET16_HUMAN Methyltransferase-like protein 16
8387	hIP191-14	hIP191-14	MePCE	[8]		Q08211	24	27	27.9	4.46	2.4e-07	140960	HOMO SAPIENS	DHX9_HUMAN ATP-dependent RNA helicase A
8388	hIP191-14	hIP191-14	MePCE	[9]		P35527	21	32	49.9	6.12	2.2e-11	62064.8	HOMO SAPIENS	K1C9_HUMAN Keratin, type I cytoskeletal 9
8389	hIP191-14	hIP191-14	MePCE	[10]		P11940	19	24	37.4	5.98	2.3e-10	70671.5	HOMO SAPIENS	PABP1_HUMAN Polyadenylate-binding protein 1
8390	hIP191-14	hIP191-14	MePCE	[10-1]	5	Q13310	12	15	23.4	5.98	2.3e-10	70783.5	HOMO SAPIENS	PABP4_HUMAN Polyadenylate-binding protein 4
8391	hIP191-14	hIP191-14	MePCE	[10-2]	0	Q9H361	9	12	15.5	4.47	7e-08	70031.5	HOMO SAPIENS	PABP3_HUMAN Polyadenylate-binding protein 3
8392	hIP191-14	hIP191-14	MePCE	[10-3]	0	Q4VXU2	4	4	7.2	4.47	7e-08	68392.9	HOMO SAPIENS	PAP1L_HUMAN Polyadenylate-binding protein 1-like
8393	hIP191-14	hIP191-14	MePCE	[10-4]	1	Q5JQF8	2	2	10	1.61	0.00018	22799.2	HOMO SAPIENS	PAP1M_HUMAN Polyadenylate-binding protein 1-like 2
8394	hIP191-14	hIP191-14	MePCE	[10-5]	0	Q96DU9	1	1	2.4	1.39	0.0011	43331.1	HOMO SAPIENS	PABP5_HUMAN Polyadenylate-binding protein 5
8395	hIP191-14	hIP191-14	MePCE	[11]		O43390	21	30	43.8	4.42	3.8e-07	70943.6	HOMO SAPIENS	HNRPR_HUMAN Heterogeneous nuclear ribonucleoprotein R
8396	hIP191-14	hIP191-14	MePCE	[11-1]	14	O60506	21	24	45.6	3.74	1.1e-06	69603.2	HOMO SAPIENS	HNRPQ_HUMAN Heterogeneous nuclear ribonucleoprotein Q
8397	hIP191-14	hIP191-14	MePCE	[12]		Q9BUJ2	18	24	27.2	5.54	1.5e-08	95739.3	HOMO SAPIENS	HNRL1_HUMAN Heterogeneous nuclear ribonucleoprotein U-like protein 1
8398	hIP191-14	hIP191-14	MePCE	[13]		P13645	16	16	35.3	6.74	1.2e-11	58827.5	HOMO SAPIENS	K1C10_HUMAN Keratin, type I cytoskeletal 10
8399	hIP191-14	hIP191-14	MePCE	[13-1]	6	P02533	7	7	17.8	3.67	1.2e-07	51561.9	HOMO SAPIENS	K1C14_HUMAN Keratin, type I cytoskeletal 14
8400	hIP191-14	hIP191-14	MePCE	[13-2]	4	P08779	5	5	11.8	2.1	4.8e-05	51268.3	HOMO SAPIENS	K1C16_HUMAN Keratin, type I cytoskeletal 16
8401	hIP191-14	hIP191-14	MePCE	[13-3]	1	P13646	2	2	5.2	1.43	0.00034	49588.6	HOMO SAPIENS	K1C13_HUMAN Keratin, type I cytoskeletal 13
8402	hIP191-14	hIP191-14	MePCE	[13-4]	0	Q7Z3Y7	2	2	3.9	1.1	0.0017	50567.8	HOMO SAPIENS	K1C28_HUMAN Keratin, type I cytoskeletal 28
8403	hIP191-14	hIP191-14	MePCE	[13-5]	0	Q7Z3Y8	2	2	3.9	1.1	0.0017	49822.8	HOMO SAPIENS	K1C27_HUMAN Keratin, type I cytoskeletal 27
8404	hIP191-14	hIP191-14	MePCE	[13-6]	0	Q7Z3Z0	2	2	4	1.1	0.0017	49318.3	HOMO SAPIENS	K1C25_HUMAN Keratin, type I cytoskeletal 25
8405	hIP191-14	hIP191-14	MePCE	[13-7]	0	Q7Z3Y9	1	1	1.9	1.1	0.0017	51911.1	HOMO SAPIENS	K1C26_HUMAN Keratin, type I cytoskeletal 26
8406	hIP191-14	hIP191-14	MePCE	[14]		P19338	17	28	24.2	4.97	4.4e-08	76615	HOMO SAPIENS	NUCL_HUMAN Nucleolin
8407	hIP191-14	hIP191-14	MePCE	[15]		P38646	17	22	39.3	4.58	9.2e-08	73681.1	HOMO SAPIENS	GRP75_HUMAN Stress-70 protein, mitochondrial
8408	hIP191-14	hIP191-14	MePCE	[16]		P67809	13	22	66	5.96	6.8e-09	35924.5	HOMO SAPIENS	YBOX1_HUMAN Nuclease-sensitive element-binding protein 1
8409	hIP191-14	hIP191-14	MePCE	[16-1]	7	P16989	11	16	50.5	5.62	6.8e-09	40090.2	HOMO SAPIENS	DBPA_HUMAN DNA-binding protein A
8410	hIP191-14	hIP191-14	MePCE	[16-2]	0	Q9Y2T7	4	8	11	5.62	6.8e-09	38518.3	HOMO SAPIENS	YBOX2_HUMAN Y-box-binding protein 2
8411	hIP191-14	hIP191-14	MePCE	[17]		P52272	15	15	30.7	5.23	2.2e-07	77516.4	HOMO SAPIENS	HNRPM_HUMAN Heterogeneous nuclear ribonucleoprotein M
8412	hIP191-14	hIP191-14	MePCE	[18]		O43395	20	27	39.8	4.3	1.8e-07	77529.6	HOMO SAPIENS	PRPF3_HUMAN U4/U6 small nuclear ribonucleoprotein Prp3
8413	hIP191-14	hIP191-14	MePCE	[19]		P61247	14	21	45.5	6.11	3.5e-09	29945.2	HOMO SAPIENS	RS3A_HUMAN 40S ribosomal protein S3a
8414	hIP191-14	hIP191-14	MePCE	[20]		Q00839	14	19	19.8	5.69	1.1e-08	90585.2	HOMO SAPIENS	HNRPU_HUMAN Heterogeneous nuclear ribonucleoprotein U
8415	hIP191-14	hIP191-14	MePCE	[21]		P78347	19	21	27.3	4.46	9.6e-08	112417	HOMO SAPIENS	GTF2I_HUMAN General transcription factor II-I
8416	hIP191-14	hIP191-14	MePCE	[21-1]	0	Q6EKJ0	1	1	0.9	1.49	0.00058	107234	HOMO SAPIENS	GTD2B_HUMAN General transcription factor II-I repeat domain-containing protein 2B
8417	hIP191-14	hIP191-14	MePCE	[21-2]	0	Q86UP8	1	1	0.9	1.49	0.00058	107232	HOMO SAPIENS	GTD2A_HUMAN General transcription factor II-I repeat domain-containing protein 2A
8418	hIP191-14	hIP191-14	MePCE	[22]		O43172	19	23	46	4.59	3.9e-08	58449.7	HOMO SAPIENS	PRP4_HUMAN U4/U6 small nuclear ribonucleoprotein Prp4
8419	hIP191-14	hIP191-14	MePCE	[23]		P16278	15	24	28.8	4.9	1.1e-07	76075.5	HOMO SAPIENS	BGAL_HUMAN Beta-galactosidase
8420	hIP191-14	hIP191-14	MePCE	[23-1]	0	Q6UWU2	1	1	1.8	0.26	0.0095	74158.7	HOMO SAPIENS	GLB1L_HUMAN Beta-galactosidase-1-like protein
8421	hIP191-14	hIP191-14	MePCE	[24]		P07437	15	19	51.6	4.75	7.3e-08	49671.3	HOMO SAPIENS	TBB5_HUMAN Tubulin beta chain
8422	hIP191-14	hIP191-14	MePCE	[24-1]	2	P68371	13	17	44.9	4.42	5.4e-07	49831.5	HOMO SAPIENS	TBB4B_HUMAN Tubulin beta-4B chain
8423	hIP191-14	hIP191-14	MePCE	[24-2]	2	P04350	11	14	38.3	4.42	5.4e-07	49586.2	HOMO SAPIENS	TBB4A_HUMAN Tubulin beta-4A chain
8424	hIP191-14	hIP191-14	MePCE	[24-3]	0	Q13885	9	12	29.4	4.42	5.4e-07	49907.4	HOMO SAPIENS	TBB2A_HUMAN Tubulin beta-2A chain
8425	hIP191-14	hIP191-14	MePCE	[24-4]	0	Q9BVA1	9	12	29.4	4.42	5.4e-07	49953.5	HOMO SAPIENS	TBB2B_HUMAN Tubulin beta-2B chain
8426	hIP191-14	hIP191-14	MePCE	[24-5]	1	Q13509	7	9	21.6	3.79	5.5e-07	50433.2	HOMO SAPIENS	TBB3_HUMAN Tubulin beta-3 chain
8427	hIP191-14	hIP191-14	MePCE	[24-6]	1	Q3ZCM7	5	5	18.2	2.45	9.8e-06	49776.5	HOMO SAPIENS	TBB8_HUMAN Tubulin beta-8 chain
8428	hIP191-14	hIP191-14	MePCE	[24-7]	0	A6NNZ2	4	4	14.9	1.84	0.00011	49573.1	HOMO SAPIENS	TBB8B_HUMAN Tubulin beta-8 chain B
8429	hIP191-14	hIP191-14	MePCE	[24-8]	0	A6NKZ8	2	2	6.5	1.78	0.00011	41775.5	HOMO SAPIENS	YI016_HUMAN Putative tubulin beta chain-like protein ENSP00000290377
8430	hIP191-14	hIP191-14	MePCE	[24-9]	0	Q9BUF5	2	2	5.4	1.78	0.00011	49857.6	HOMO SAPIENS	TBB6_HUMAN Tubulin beta-6 chain
8431	hIP191-14	hIP191-14	MePCE	[24-10]	0	Q9H4B7	1	1	2.2	1.78	0.00011	50327.4	HOMO SAPIENS	TBB1_HUMAN Tubulin beta-1 chain
8432	hIP191-14	hIP191-14	MePCE	[25]		P62701	15	27	54.8	4.85	2.1e-08	29598	HOMO SAPIENS	RS4X_HUMAN 40S ribosomal protein S4, X isoform
8433	hIP191-14	hIP191-14	MePCE	[25-1]	1	P22090	7	9	28.1	2.52	3.5e-05	29455.9	HOMO SAPIENS	RS4Y1_HUMAN 40S ribosomal protein S4, Y isoform 1
8434	hIP191-14	hIP191-14	MePCE	[25-2]	0	Q8TD47	6	8	21.3	2.52	3.5e-05	29295.7	HOMO SAPIENS	RS4Y2_HUMAN 40S ribosomal protein S4, Y isoform 2
8435	hIP191-14	hIP191-14	MePCE	[26]		P82933	12	15	30.8	5.68	6.4e-09	45835.2	HOMO SAPIENS	RT09_HUMAN 28S ribosomal protein S9, mitochondrial
8436	hIP191-14	hIP191-14	MePCE	[27]		Q07021	10	296	42.9	5.82	1.2e-09	31362.5	HOMO SAPIENS	C1QBP_HUMAN Complement component 1 Q subcomponent-binding protein, mitochondrial
8437	hIP191-14	hIP191-14	MePCE	[28]		P15880	14	28	43.3	4.67	5.9e-08	31324.7	HOMO SAPIENS	RS2_HUMAN 40S ribosomal protein S2
8438	hIP191-14	hIP191-14	MePCE	[29]		P46782	10	23	51	5.74	1.4e-08	22876.6	HOMO SAPIENS	RS5_HUMAN 40S ribosomal protein S5
8439	hIP191-14	hIP191-14	MePCE	[30]		P68363	14	15	46.8	4.24	2.9e-07	50152.1	HOMO SAPIENS	TBA1B_HUMAN Tubulin alpha-1B chain
8440	hIP191-14	hIP191-14	MePCE	[30-1]	0	Q71U36	12	13	40.8	4.24	2.9e-07	50136.1	HOMO SAPIENS	TBA1A_HUMAN Tubulin alpha-1A chain
8441	hIP191-14	hIP191-14	MePCE	[30-2]	1	Q9BQE3	13	14	44.1	3.66	2.9e-07	49895.8	HOMO SAPIENS	TBA1C_HUMAN Tubulin alpha-1C chain
8442	hIP191-14	hIP191-14	MePCE	[30-3]	0	P68366	10	11	35	4.16	4.7e-07	49924.9	HOMO SAPIENS	TBA4A_HUMAN Tubulin alpha-4A chain
8443	hIP191-14	hIP191-14	MePCE	[30-4]	0	Q13748	9	10	33.6	4.24	2.9e-07	49960	HOMO SAPIENS	TBA3C_HUMAN Tubulin alpha-3C/D chain
8444	hIP191-14	hIP191-14	MePCE	[30-5]	0	Q6PEY2	8	9	28.9	4.24	2.9e-07	49859	HOMO SAPIENS	TBA3E_HUMAN Tubulin alpha-3E chain
8445	hIP191-14	hIP191-14	MePCE	[30-6]	0	Q9NY65	6	6	21.2	3.05	1.1e-05	50094	HOMO SAPIENS	TBA8_HUMAN Tubulin alpha-8 chain
8446	hIP191-14	hIP191-14	MePCE	[30-7]	0	A6NHL2	2	2	3.6	2.04	2.8e-05	49909.2	HOMO SAPIENS	TBAL3_HUMAN Tubulin alpha chain-like 3
8447	hIP191-14	hIP191-14	MePCE	[31]		Q9H6E5	11	11	20.3	5.86	1.1e-09	93847.7	HOMO SAPIENS	STPAP_HUMAN Speckle targeted PIP5K1A-regulated poly(A) polymerase
8448	hIP191-14	hIP191-14	MePCE	[32]		P62241	10	19	57.7	5.43	2.5e-08	24205.4	HOMO SAPIENS	RS8_HUMAN 40S ribosomal protein S8
8449	hIP191-14	hIP191-14	MePCE	[33]		Q7L2E3	18	19	20.4	3.11	3.4e-06	133939	HOMO SAPIENS	DHX30_HUMAN Putative ATP-dependent RNA helicase DHX30
8450	hIP191-14	hIP191-14	MePCE	[34]		Q96EY7	12	13	25.5	4.51	1.9e-07	78550.4	HOMO SAPIENS	PTCD3_HUMAN Pentatricopeptide repeat-containing protein 3, mitochondrial
8451	hIP191-14	hIP191-14	MePCE	[35]		P36578	12	15	32.8	4.97	2e-08	47697.7	HOMO SAPIENS	RL4_HUMAN 60S ribosomal protein L4
8452	hIP191-14	hIP191-14	MePCE	[36]		P23396	16	29	67.5	3.95	8.7e-08	26688.6	HOMO SAPIENS	RS3_HUMAN 40S ribosomal protein S3
8453	hIP191-14	hIP191-14	MePCE	[37]		Q9NZI8	10	11	23.9	5.07	4.6e-08	63481.1	HOMO SAPIENS	IF2B1_HUMAN Insulin-like growth factor 2 mRNA-binding protein 1
8454	hIP191-14	hIP191-14	MePCE	[37-1]	4	O00425	5	5	13.6	3.05	1.7e-06	63705.6	HOMO SAPIENS	IF2B3_HUMAN Insulin-like growth factor 2 mRNA-binding protein 3
8455	hIP191-14	hIP191-14	MePCE	[37-2]	2	Q9Y6M1	3	3	7.3	3.05	1.7e-06	66121.9	HOMO SAPIENS	IF2B2_HUMAN Insulin-like growth factor 2 mRNA-binding protein 2
8456	hIP191-14	hIP191-14	MePCE	[38]		P10809	12	12	29.3	4.34	1e-07	61055.2	HOMO SAPIENS	CH60_HUMAN 60 kDa heat shock protein, mitochondrial
8457	hIP191-14	hIP191-14	MePCE	[39]		P52292	13	22	33.1	4.22	3.9e-08	57862.4	HOMO SAPIENS	IMA2_HUMAN Importin subunit alpha-2
8458	hIP191-14	hIP191-14	MePCE	[39-1]	0	A9QM74	1	1	2.1	2.22	2.1e-05	56938.4	HOMO SAPIENS	IMA8_HUMAN Importin subunit alpha-8
8459	hIP191-14	hIP191-14	MePCE	[40]		P10619	9	13	24.4	5.87	4e-09	54466.6	HOMO SAPIENS	PPGB_HUMAN Lysosomal protective protein
8460	hIP191-14	hIP191-14	MePCE	[41]		P78371	11	12	31.8	4.1	2.4e-06	57488.7	HOMO SAPIENS	TCPB_HUMAN T-complex protein 1 subunit beta
8461	hIP191-14	hIP191-14	MePCE	[42]		P08865	8	8	35.3	5.73	6.9e-09	32854.4	HOMO SAPIENS	RSSA_HUMAN 40S ribosomal protein SA
8462	hIP191-14	hIP191-14	MePCE	[43]		P39023	13	19	34	4.03	1.4e-07	46109.3	HOMO SAPIENS	RL3_HUMAN 60S ribosomal protein L3
8463	hIP191-14	hIP191-14	MePCE	[44]		O60563	12	14	23.7	5.12	8e-10	80685.3	HOMO SAPIENS	CCNT1_HUMAN Cyclin-T1
8464	hIP191-14	hIP191-14	MePCE	[45]		P62263	9	15	39.7	4.93	2.1e-08	16272.9	HOMO SAPIENS	RS14_HUMAN 40S ribosomal protein S14
8465	hIP191-14	hIP191-14	MePCE	[46]		P50990	12	14	22.6	4.36	3e-08	59621.1	HOMO SAPIENS	TCPQ_HUMAN T-complex protein 1 subunit theta
8466	hIP191-14	hIP191-14	MePCE	[47]		P06576	9	10	23.3	4.62	7.3e-07	56560.4	HOMO SAPIENS	ATPB_HUMAN ATP synthase subunit beta, mitochondrial
8467	hIP191-14	hIP191-14	MePCE	[48]		P08708	9	14	57.8	5.35	3.7e-09	15550.3	HOMO SAPIENS	RS17_HUMAN 40S ribosomal protein S17
8468	hIP191-14	hIP191-14	MePCE	[48-1]	0	P0CW22	9	14	57.8	5.35	3.7e-09	15550.3	HOMO SAPIENS	RS17L_HUMAN 40S ribosomal protein S17-like
8469	hIP191-14	hIP191-14	MePCE	[49]		Q92665	8	9	23.3	5.04	6.4e-08	45318.8	HOMO SAPIENS	RT31_HUMAN 28S ribosomal protein S31, mitochondrial
8470	hIP191-14	hIP191-14	MePCE	[50]		P25398	9	22	50.8	5.65	1e-09	14515.1	HOMO SAPIENS	RS12_HUMAN 40S ribosomal protein S12
8471	hIP191-14	hIP191-14	MePCE	[51]		P62829	8	14	46.4	6.72	8.6e-12	14865.6	HOMO SAPIENS	RL23_HUMAN 60S ribosomal protein L23
8472	hIP191-14	hIP191-14	MePCE	[52]		P05388	11	14	39.7	4.35	1.7e-08	34273.8	HOMO SAPIENS	RLA0_HUMAN 60S acidic ribosomal protein P0
8473	hIP191-14	hIP191-14	MePCE	[52-1]	0	Q8NHW5	8	10	29.3	3.82	4.3e-07	34364.8	HOMO SAPIENS	RLA0L_HUMAN 60S acidic ribosomal protein P0-like
8474	hIP191-14	hIP191-14	MePCE	[53]		Q9NR30	11	13	21.6	3.71	9.1e-07	87345.1	HOMO SAPIENS	DDX21_HUMAN Nucleolar RNA helicase 2
8475	hIP191-14	hIP191-14	MePCE	[53-1]	1	Q9BQ39	2	2	5	3.24	1.3e-06	82565.7	HOMO SAPIENS	DDX50_HUMAN ATP-dependent RNA helicase DDX50
8476	hIP191-14	hIP191-14	MePCE	[54]		P68400	9	10	37.6	5.32	8.9e-10	45144	HOMO SAPIENS	CSK21_HUMAN Casein kinase II subunit alpha
8477	hIP191-14	hIP191-14	MePCE	[55]		P06748	7	15	34	5.72	2.2e-09	32575.3	HOMO SAPIENS	NPM_HUMAN Nucleophosmin
8478	hIP191-14	hIP191-14	MePCE	[56]		P50750	11	12	36.6	4.32	1e-07	42777.9	HOMO SAPIENS	CDK9_HUMAN Cyclin-dependent kinase 9
8479	hIP191-14	hIP191-14	MePCE	[56-1]	1	P06493	2	2	6.7	2.4	4.5e-05	34095.7	HOMO SAPIENS	CDK1_HUMAN Cyclin-dependent kinase 1
8480	hIP191-14	hIP191-14	MePCE	[57]		Q14974	10	10	17.1	4.13	5.1e-07	97171.1	HOMO SAPIENS	IMB1_HUMAN Importin subunit beta-1
8481	hIP191-14	hIP191-14	MePCE	[58]		P62249	13	26	63.7	3.71	2e-07	16445.5	HOMO SAPIENS	RS16_HUMAN 40S ribosomal protein S16
8482	hIP191-14	hIP191-14	MePCE	[59]		Q8WWY3	10	10	30.5	4.12	2.5e-07	55456.5	HOMO SAPIENS	PRP31_HUMAN U4/U6 small nuclear ribonucleoprotein Prp31
8483	hIP191-14	hIP191-14	MePCE	[60]		O00629	8	9	29	4.9	6.9e-08	57887.2	HOMO SAPIENS	IMA4_HUMAN Importin subunit alpha-4
8484	hIP191-14	hIP191-14	MePCE	[60-1]	3	O00505	4	4	11.3	1.66	0.0005	57811.4	HOMO SAPIENS	IMA3_HUMAN Importin subunit alpha-3
8485	hIP191-14	hIP191-14	MePCE	[61]		P31943	7	8	19.8	5.45	4.4e-08	49229.9	HOMO SAPIENS	HNRH1_HUMAN Heterogeneous nuclear ribonucleoprotein H
8486	hIP191-14	hIP191-14	MePCE	[61-1]	5	P52597	6	7	22.2	5.04	1.4e-07	45672.3	HOMO SAPIENS	HNRPF_HUMAN Heterogeneous nuclear ribonucleoprotein F
8487	hIP191-14	hIP191-14	MePCE	[61-2]	0	P55795	3	4	9.6	5.45	4.4e-08	49264	HOMO SAPIENS	HNRH2_HUMAN Heterogeneous nuclear ribonucleoprotein H2
8488	hIP191-14	hIP191-14	MePCE	[62]		P11021	9	10	20.3	4.49	2.8e-08	72333.5	HOMO SAPIENS	GRP78_HUMAN 78 kDa glucose-regulated protein
8489	hIP191-14	hIP191-14	MePCE	[5-4, 62-1]	7	P54652	8	13	12.1	3.86	1.3e-07	70021.5	HOMO SAPIENS	HSP72_HUMAN Heat shock-related 70 kDa protein 2
8490	hIP191-14	hIP191-14	MePCE	[63]		P22626	7	8	30	6.28	7.2e-11	37430	HOMO SAPIENS	ROA2_HUMAN Heterogeneous nuclear ribonucleoproteins A2/B1
8491	hIP191-14	hIP191-14	MePCE	[64]		P51398	8	8	27.6	4.37	3.9e-07	45566.8	HOMO SAPIENS	RT29_HUMAN 28S ribosomal protein S29, mitochondrial
8492	hIP191-14	hIP191-14	MePCE	[65]		P62081	7	11	42.8	5.9	1.8e-09	22127	HOMO SAPIENS	RS7_HUMAN 40S ribosomal protein S7
8493	hIP191-14	hIP191-14	MePCE	[66]		Q7Z2W4	7	7	14.4	5.57	3.2e-09	101432	HOMO SAPIENS	ZCCHV_HUMAN Zinc finger CCCH-type antiviral protein 1
8494	hIP191-14	hIP191-14	MePCE	[67]		Q14739	10	15	16.4	4.78	2.5e-09	70703.8	HOMO SAPIENS	LBR_HUMAN Lamin-B receptor
8495	hIP191-14	hIP191-14	MePCE	[68]		P30050	7	15	54.5	5.26	1.5e-09	17818.7	HOMO SAPIENS	RL12_HUMAN 60S ribosomal protein L12
8496	hIP191-14	hIP191-14	MePCE	[69]		P25705	10	10	23.3	3.45	1.9e-06	59751.1	HOMO SAPIENS	ATPA_HUMAN ATP synthase subunit alpha, mitochondrial
8497	hIP191-14	hIP191-14	MePCE	[70]		P13010	10	11	19	3.69	1.3e-06	82705.3	HOMO SAPIENS	XRCC5_HUMAN X-ray repair cross-complementing protein 5
8498	hIP191-14	hIP191-14	MePCE	[71]		Q92552	9	12	29.7	4.03	6.1e-07	47611.8	HOMO SAPIENS	RT27_HUMAN 28S ribosomal protein S27, mitochondrial
8499	hIP191-14	hIP191-14	MePCE	[72]		P35637	7	16	20.3	4.15	2.8e-06	53426.2	HOMO SAPIENS	FUS_HUMAN RNA-binding protein FUS
8500	hIP191-14	hIP191-14	MePCE	[72-1]	0	Q92804	2	2	3.9	3.62	2.8e-06	61830.4	HOMO SAPIENS	RBP56_HUMAN TATA-binding protein-associated factor 2N
8501	hIP191-14	hIP191-14	MePCE	[73]		P39019	10	13	50.3	3.29	4.6e-06	16060.6	HOMO SAPIENS	RS19_HUMAN 40S ribosomal protein S19
8502	hIP191-14	hIP191-14	MePCE	[74]		P68104	8	11	27.3	4.31	1.4e-07	50141.3	HOMO SAPIENS	EF1A1_HUMAN Elongation factor 1-alpha 1
8503	hIP191-14	hIP191-14	MePCE	[74-1]	0	Q5VTE0	8	11	27.3	4.31	1.4e-07	50185.5	HOMO SAPIENS	EF1A3_HUMAN Putative elongation factor 1-alpha-like 3
8504	hIP191-14	hIP191-14	MePCE	[74-2]	0	Q05639	3	4	7.1	2.2	5e-05	50470.6	HOMO SAPIENS	EF1A2_HUMAN Elongation factor 1-alpha 2
8505	hIP191-14	hIP191-14	MePCE	[75]		P82650	10	13	30.3	3.33	5.6e-06	41280.7	HOMO SAPIENS	RT22_HUMAN 28S ribosomal protein S22, mitochondrial
8506	hIP191-14	hIP191-14	MePCE	[76]		P46781	10	12	39.7	4.22	7.7e-08	22591.6	HOMO SAPIENS	RS9_HUMAN 40S ribosomal protein S9
8507	hIP191-14	hIP191-14	MePCE	[77]		P37108	7	10	44.9	4.42	1.8e-06	14570.1	HOMO SAPIENS	SRP14_HUMAN Signal recognition particle 14 kDa protein
8508	hIP191-14	hIP191-14	MePCE	[78]		O43143	8	8	12.8	3.7	1.5e-05	90933.6	HOMO SAPIENS	DHX15_HUMAN Putative pre-mRNA-splicing factor ATP-dependent RNA helicase DHX15
8509	hIP191-14	hIP191-14	MePCE	[79]		Q99623	8	9	34.1	3.77	3.2e-06	33296.7	HOMO SAPIENS	PHB2_HUMAN Prohibitin-2
8510	hIP191-14	hIP191-14	MePCE	[80]		P05387	5	8	69.6	5.56	5.9e-09	11665	HOMO SAPIENS	RLA2_HUMAN 60S acidic ribosomal protein P2
8511	hIP191-14	hIP191-14	MePCE	[81]		P46783	8	17	48.5	3.93	9e-07	18897.9	HOMO SAPIENS	RS10_HUMAN 40S ribosomal protein S10
8512	hIP191-14	hIP191-14	MePCE	[81-1]	0	Q9NQ39	3	8	17.6	3.93	9e-07	20120.5	HOMO SAPIENS	RS10L_HUMAN Putative 40S ribosomal protein S10-like
8513	hIP191-14	hIP191-14	MePCE	[82]		P46777	9	11	38.7	3.67	3.5e-07	34362.9	HOMO SAPIENS	RL5_HUMAN 60S ribosomal protein L5
8514	hIP191-14	hIP191-14	MePCE	[83]		P62269	10	21	48.7	3.4	2.5e-06	17718.8	HOMO SAPIENS	RS18_HUMAN 40S ribosomal protein S18
8515	hIP191-14	hIP191-14	MePCE	[84]		Q13263	8	8	24.9	4.32	8.3e-08	88550.5	HOMO SAPIENS	TIF1B_HUMAN Transcription intermediary factor 1-beta
8516	hIP191-14	hIP191-14	MePCE	[85]		P27635	7	11	35	3.78	3.2e-06	24604.1	HOMO SAPIENS	RL10_HUMAN 60S ribosomal protein L10
8517	hIP191-14	hIP191-14	MePCE	[85-1]	0	Q96L21	2	2	10.7	1.57	0.0011	24519	HOMO SAPIENS	RL10L_HUMAN 60S ribosomal protein L10-like
8518	hIP191-14	hIP191-14	MePCE	[86]		P62841	6	9	49	5.04	6.4e-09	17040.3	HOMO SAPIENS	RS15_HUMAN 40S ribosomal protein S15
8519	hIP191-14	hIP191-14	MePCE	[87]		Q9Y6H1	5	31	33.8	5.5	1.8e-08	15512.7	HOMO SAPIENS	CHCH2_HUMAN Coiled-coil-helix-coiled-coil-helix domain-containing protein 2, mitochondrial
8520	hIP191-14	hIP191-14	MePCE	[87-1]	0	Q5T1J5	3	26	27.2	5.5	1.8e-08	15489.7	HOMO SAPIENS	CHCH9_HUMAN Putative coiled-coil-helix-coiled-coil-helix domain-containing protein CHCHD2P9, mitochondrial
8521	hIP191-14	hIP191-14	MePCE	[88]		Q9C0C9	9	9	11.6	3.95	7.6e-08	141295	HOMO SAPIENS	UBE2O_HUMAN Ubiquitin-conjugating enzyme E2 O
8522	hIP191-14	hIP191-14	MePCE	[89]		P09651	5	6	19.1	5.3	5.7e-09	38746.9	HOMO SAPIENS	ROA1_HUMAN Heterogeneous nuclear ribonucleoprotein A1
8523	hIP191-14	hIP191-14	MePCE	[89-1]	0	Q32P51	2	3	8.1	4.19	1.5e-06	34225.6	HOMO SAPIENS	RA1L2_HUMAN Heterogeneous nuclear ribonucleoprotein A1-like 2
8524	hIP191-14	hIP191-14	MePCE	[90]		P62424	7	7	19.2	4.34	6.5e-08	29995.9	HOMO SAPIENS	RL7A_HUMAN 60S ribosomal protein L7a
8525	hIP191-14	hIP191-14	MePCE	[91]		P35573	8	8	8	3.62	9.7e-07	174765	HOMO SAPIENS	GDE_HUMAN Glycogen debranching enzyme
8526	hIP191-14	hIP191-14	MePCE	[92]		Q9Y5A9	9	9	29	2.54	0.00029	62334.7	HOMO SAPIENS	YTHD2_HUMAN YTH domain family protein 2
8527	hIP191-14	hIP191-14	MePCE	[92-1]	3	Q9BYJ9	4	4	13.4	3.32	2.2e-06	60874.1	HOMO SAPIENS	YTHD1_HUMAN YTH domain family protein 1
8528	hIP191-14	hIP191-14	MePCE	[92-2]	1	Q7Z739	2	2	3.4	0.68	0.0026	63861.8	HOMO SAPIENS	YTHD3_HUMAN YTH domain family protein 3
8529	hIP191-14	hIP191-14	MePCE	[93]		O60814	5	12	20.6	5.13	1e-09	13890.3	HOMO SAPIENS	H2B1K_HUMAN Histone H2B type 1-K
8530	hIP191-14	hIP191-14	MePCE	[93-1]	0	P06899	5	12	20.6	5.13	1e-09	13904.3	HOMO SAPIENS	H2B1J_HUMAN Histone H2B type 1-J
8531	hIP191-14	hIP191-14	MePCE	[93-2]	0	P23527	5	12	20.6	5.13	1e-09	13906.3	HOMO SAPIENS	H2B1O_HUMAN Histone H2B type 1-O
8532	hIP191-14	hIP191-14	MePCE	[93-3]	0	P33778	5	12	20.6	5.13	1e-09	13950.3	HOMO SAPIENS	H2B1B_HUMAN Histone H2B type 1-B
8533	hIP191-14	hIP191-14	MePCE	[93-4]	0	P57053	5	12	20.6	5.13	1e-09	13944.3	HOMO SAPIENS	H2BFS_HUMAN Histone H2B type F-S
8534	hIP191-14	hIP191-14	MePCE	[93-5]	0	P58876	5	12	20.6	5.13	1e-09	13936.3	HOMO SAPIENS	H2B1D_HUMAN Histone H2B type 1-D
8535	hIP191-14	hIP191-14	MePCE	[93-6]	0	P62807	5	12	20.6	5.13	1e-09	13906.3	HOMO SAPIENS	H2B1C_HUMAN Histone H2B type 1-C/E/F/G/I
8536	hIP191-14	hIP191-14	MePCE	[93-7]	0	Q16778	5	12	20.6	5.13	1e-09	13920.3	HOMO SAPIENS	H2B2E_HUMAN Histone H2B type 2-E
8537	hIP191-14	hIP191-14	MePCE	[93-8]	0	Q5QNW6	5	12	20.6	5.13	1e-09	13920.3	HOMO SAPIENS	H2B2F_HUMAN Histone H2B type 2-F
8538	hIP191-14	hIP191-14	MePCE	[93-9]	0	Q8N257	5	12	20.6	5.13	1e-09	13908.2	HOMO SAPIENS	H2B3B_HUMAN Histone H2B type 3-B
8539	hIP191-14	hIP191-14	MePCE	[93-10]	0	Q93079	5	12	20.6	5.13	1e-09	13892.2	HOMO SAPIENS	H2B1H_HUMAN Histone H2B type 1-H
8540	hIP191-14	hIP191-14	MePCE	[93-11]	0	Q99877	5	12	20.6	5.13	1e-09	13922.3	HOMO SAPIENS	H2B1N_HUMAN Histone H2B type 1-N
8541	hIP191-14	hIP191-14	MePCE	[93-12]	0	Q99879	5	12	20.6	5.13	1e-09	13989.4	HOMO SAPIENS	H2B1M_HUMAN Histone H2B type 1-M
8542	hIP191-14	hIP191-14	MePCE	[93-13]	0	Q99880	5	12	20.6	5.13	1e-09	13952.3	HOMO SAPIENS	H2B1L_HUMAN Histone H2B type 1-L
8543	hIP191-14	hIP191-14	MePCE	[93-14]	0	Q96A08	2	5	8.7	1.65	0.00015	14167.6	HOMO SAPIENS	H2B1A_HUMAN Histone H2B type 1-A
8544	hIP191-14	hIP191-14	MePCE	[94]		P82675	6	6	17.2	4.5	6.5e-08	48006.9	HOMO SAPIENS	RT05_HUMAN 28S ribosomal protein S5, mitochondrial
8545	hIP191-14	hIP191-14	MePCE	[95]		P50991	6	6	14.5	5.08	3.5e-09	57924.8	HOMO SAPIENS	TCPD_HUMAN T-complex protein 1 subunit delta
8546	hIP191-14	hIP191-14	MePCE	[96]		P82673	8	8	31.6	2.81	4.3e-05	36844.6	HOMO SAPIENS	RT35_HUMAN 28S ribosomal protein S35, mitochondrial
8547	hIP191-14	hIP191-14	MePCE	[97]		Q99832	9	10	19.5	3.05	3.1e-06	59367.2	HOMO SAPIENS	TCPH_HUMAN T-complex protein 1 subunit eta
8548	hIP191-14	hIP191-14	MePCE	[98]		P17987	7	7	17.8	3.77	3e-07	60344.1	HOMO SAPIENS	TCPA_HUMAN T-complex protein 1 subunit alpha
8549	hIP191-14	hIP191-14	MePCE	[99]		P49368	8	9	17.1	3.25	5.1e-06	60534.5	HOMO SAPIENS	TCPG_HUMAN T-complex protein 1 subunit gamma
8550	hIP191-14	hIP191-14	MePCE	[100]		P62888	7	9	66.1	3.56	3.4e-06	12784.2	HOMO SAPIENS	RL30_HUMAN 60S ribosomal protein L30
8551	hIP191-14	hIP191-14	MePCE	[101]		O00571	6	6	11.8	3.84	1.3e-06	73244	HOMO SAPIENS	DDX3X_HUMAN ATP-dependent RNA helicase DDX3X
8552	hIP191-14	hIP191-14	MePCE	[101-1]	0	O15523	4	4	7.9	2.89	1.8e-05	73154.2	HOMO SAPIENS	DDX3Y_HUMAN ATP-dependent RNA helicase DDX3Y
8553	hIP191-14	hIP191-14	MePCE	[101-2]	0	Q9NQI0	1	1	1.7	1.64	9.3e-05	79308.2	HOMO SAPIENS	DDX4_HUMAN Probable ATP-dependent RNA helicase DDX4
8554	hIP191-14	hIP191-14	MePCE	[102]		P61978	6	6	18.4	4.17	1.5e-07	50976.7	HOMO SAPIENS	HNRPK_HUMAN Heterogeneous nuclear ribonucleoprotein K
8555	hIP191-14	hIP191-14	MePCE	[103]		Q9Y2S7	8	8	32.3	3.32	6.5e-07	42033.6	HOMO SAPIENS	PDIP2_HUMAN Polymerase delta-interacting protein 2
8556	hIP191-14	hIP191-14	MePCE	[104]		Q9Y2R5	5	6	60	4.78	1.6e-07	14502.2	HOMO SAPIENS	RT17_HUMAN 28S ribosomal protein S17, mitochondrial
8557	hIP191-14	hIP191-14	MePCE	[105]		Q13151	5	5	22.3	4.7	1.3e-07	30840.9	HOMO SAPIENS	ROA0_HUMAN Heterogeneous nuclear ribonucleoprotein A0
8558	hIP191-14	hIP191-14	MePCE	[106]		P83731	7	11	37.6	3.76	1.2e-06	17779.1	HOMO SAPIENS	RL24_HUMAN 60S ribosomal protein L24
8559	hIP191-14	hIP191-14	MePCE	[107]		P02538	6	7	12.4	3.93	1.5e-06	60045.4	HOMO SAPIENS	K2C6A_HUMAN Keratin, type II cytoskeletal 6A
8560	hIP191-14	hIP191-14	MePCE	[107-1]	0	P48668	6	7	12.4	3.93	1.5e-06	60025.4	HOMO SAPIENS	K2C6C_HUMAN Keratin, type II cytoskeletal 6C
8561	hIP191-14	hIP191-14	MePCE	[107-2]	0	P04259	5	6	10.6	3.93	1.5e-06	60067.4	HOMO SAPIENS	K2C6B_HUMAN Keratin, type II cytoskeletal 6B
8562	hIP191-14	hIP191-14	MePCE	[107-3]	2	P13647	4	5	7.3	3.27	8.3e-05	62378.9	HOMO SAPIENS	K2C5_HUMAN Keratin, type II cytoskeletal 5
8563	hIP191-14	hIP191-14	MePCE	[107-4]	0	O95678	2	2	4	3.27	8.3e-05	59560.9	HOMO SAPIENS	K2C75_HUMAN Keratin, type II cytoskeletal 75
8564	hIP191-14	hIP191-14	MePCE	[3-2, 107-5]	2	P19013	3	3	6	2.15	0.00016	57285.7	HOMO SAPIENS	K2C4_HUMAN Keratin, type II cytoskeletal 4
8565	hIP191-14	hIP191-14	MePCE	[107-6]	0	Q5XKE5	1	1	2.2	3.27	8.3e-05	57836.1	HOMO SAPIENS	K2C79_HUMAN Keratin, type II cytoskeletal 79
8566	hIP191-14	hIP191-14	MePCE	[107-7]	0	Q01546	1	1	1.4	1.74	0.0019	65841.3	HOMO SAPIENS	K22O_HUMAN Keratin, type II cytoskeletal 2 oral
8567	hIP191-14	hIP191-14	MePCE	[108]		Q15366	5	5	20.3	4.78	2e-08	38580.4	HOMO SAPIENS	PCBP2_HUMAN Poly(rC)-binding protein 2
8568	hIP191-14	hIP191-14	MePCE	[108-1]	2	Q15365	4	4	16.3	4.78	2e-08	37498.2	HOMO SAPIENS	PCBP1_HUMAN Poly(rC)-binding protein 1
8569	hIP191-14	hIP191-14	MePCE	[108-2]	0	P57721	3	3	12.1	4.78	2e-08	39465.6	HOMO SAPIENS	PCBP3_HUMAN Poly(rC)-binding protein 3
8570	hIP191-14	hIP191-14	MePCE	[109]		P55209	5	6	16.6	3.95	1.2e-06	45374.5	HOMO SAPIENS	NP1L1_HUMAN Nucleosome assembly protein 1-like 1
8571	hIP191-14	hIP191-14	MePCE	[110]		O95793	5	5	12.1	4.55	9.5e-08	63182.8	HOMO SAPIENS	STAU1_HUMAN Double-stranded RNA-binding protein Staufen homolog 1
8572	hIP191-14	hIP191-14	MePCE	[111]		Q8NB15	7	8	40.8	3.07	1.1e-05	29427.9	HOMO SAPIENS	ZN511_HUMAN Zinc finger protein 511
8573	hIP191-14	hIP191-14	MePCE	[112]		O95777	5	6	83.3	4.06	1.6e-07	10402.7	HOMO SAPIENS	NAA38_HUMAN N-alpha-acetyltransferase 38, NatC auxiliary subunit
8574	hIP191-14	hIP191-14	MePCE	[113]		P07814	5	5	6	4.1	1.2e-07	170592	HOMO SAPIENS	SYEP_HUMAN Bifunctional glutamate/proline--tRNA ligase
8575	hIP191-14	hIP191-14	MePCE	[114]		Q99729	5	6	18.7	4.2	7.8e-08	36225.2	HOMO SAPIENS	ROAA_HUMAN Heterogeneous nuclear ribonucleoprotein A/B
8576	hIP191-14	hIP191-14	MePCE	[114-1]	2	Q14103	3	4	11.5	2.39	4e-05	38434.5	HOMO SAPIENS	HNRPD_HUMAN Heterogeneous nuclear ribonucleoprotein D0
8577	hIP191-14	hIP191-14	MePCE	[114-2]	0	O14979	1	2	2.4	1.94	4.4e-05	46437.9	HOMO SAPIENS	HNRDL_HUMAN Heterogeneous nuclear ribonucleoprotein D-like
8578	hIP191-14	hIP191-14	MePCE	[115]		O94992	4	5	23.7	5.95	6.6e-10	40623.8	HOMO SAPIENS	HEXI1_HUMAN Protein HEXIM1
8579	hIP191-14	hIP191-14	MePCE	[115-1]	1	Q96MH2	2	2	8	0.93	0.001	32418.8	HOMO SAPIENS	HEXI2_HUMAN Protein HEXIM2
8580	hIP191-14	hIP191-14	MePCE	[116]		P35232	9	9	48.2	2.87	2.1e-06	29804.3	HOMO SAPIENS	PHB_HUMAN Prohibitin
8581	hIP191-14	hIP191-14	MePCE	[117]		P23284	6	6	35.6	3.73	3.6e-07	23742.7	HOMO SAPIENS	PPIB_HUMAN Peptidyl-prolyl cis-trans isomerase B
8582	hIP191-14	hIP191-14	MePCE	[118]		P63173	6	13	51.4	3.61	1.9e-06	8218	HOMO SAPIENS	RL38_HUMAN 60S ribosomal protein L38
8583	hIP191-14	hIP191-14	MePCE	[119]		P67870	6	7	41.4	3.66	2.8e-07	24942.7	HOMO SAPIENS	CSK2B_HUMAN Casein kinase II subunit beta
8584	hIP191-14	hIP191-14	MePCE	[120]		Q6PKG0	8	8	11.9	3.15	6.7e-07	123511	HOMO SAPIENS	LARP1_HUMAN La-related protein 1
8585	hIP191-14	hIP191-14	MePCE	[120-1]	0	Q659C4	1	1	1.5	3.15	6.7e-07	105323	HOMO SAPIENS	LAR1B_HUMAN La-related protein 1B
8586	hIP191-14	hIP191-14	MePCE	[121]		P62913	5	6	31.5	3.9	1.7e-06	20252.6	HOMO SAPIENS	RL11_HUMAN 60S ribosomal protein L11
8587	hIP191-14	hIP191-14	MePCE	[122]		P62750	7	13	44.2	3.02	4.5e-06	17695.2	HOMO SAPIENS	RL23A_HUMAN 60S ribosomal protein L23a
8588	hIP191-14	hIP191-14	MePCE	[123]		P08238	5	6	10.1	3.69	4.9e-07	83264.9	HOMO SAPIENS	HS90B_HUMAN Heat shock protein HSP 90-beta
8589	hIP191-14	hIP191-14	MePCE	[123-1]	3	P07900	5	6	8.3	3.67	4.9e-07	84660.4	HOMO SAPIENS	HS90A_HUMAN Heat shock protein HSP 90-alpha
8590	hIP191-14	hIP191-14	MePCE	[123-2]	0	Q58FG1	1	2	3.1	3.67	4.9e-07	47712.3	HOMO SAPIENS	HS904_HUMAN Putative heat shock protein HSP 90-alpha A4
8591	hIP191-14	hIP191-14	MePCE	[123-3]	0	Q14568	1	1	3.5	1.79	0.00036	39365.1	HOMO SAPIENS	HS902_HUMAN Putative heat shock protein HSP 90-alpha A2
8592	hIP191-14	hIP191-14	MePCE	[123-4]	0	Q58FF8	1	1	3.1	1.79	0.00036	44349.3	HOMO SAPIENS	H90B2_HUMAN Putative heat shock protein HSP 90-beta 2
8593	hIP191-14	hIP191-14	MePCE	[123-5]	0	P14625	1	1	1.5	1.48	0.00017	92469.6	HOMO SAPIENS	ENPL_HUMAN Endoplasmin
8594	hIP191-14	hIP191-14	MePCE	[124]		Q9BY77	6	6	23	3.01	3.3e-06	46089.7	HOMO SAPIENS	PDIP3_HUMAN Polymerase delta-interacting protein 3
8595	hIP191-14	hIP191-14	MePCE	[125]		P62277	6	12	39.1	3.3	4.1e-06	17222.4	HOMO SAPIENS	RS13_HUMAN 40S ribosomal protein S13
8596	hIP191-14	hIP191-14	MePCE	[126]		P26641	5	6	16.5	3.47	2.3e-06	50119.2	HOMO SAPIENS	EF1G_HUMAN Elongation factor 1-gamma
8597	hIP191-14	hIP191-14	MePCE	[127]		P62280	9	12	50.6	2.24	3e-05	18430.9	HOMO SAPIENS	RS11_HUMAN 40S ribosomal protein S11
8598	hIP191-14	hIP191-14	MePCE	[128]		P48643	4	5	10	4.3	5e-07	59671.6	HOMO SAPIENS	TCPE_HUMAN T-complex protein 1 subunit epsilon
8599	hIP191-14	hIP191-14	MePCE	[129]		Q01844	5	6	11	3.8	1.7e-06	68478.8	HOMO SAPIENS	EWS_HUMAN RNA-binding protein EWS
8600	hIP191-14	hIP191-14	MePCE	[130]		Q7Z4Q2	5	5	12.9	4.3	1.8e-08	74583.4	HOMO SAPIENS	HEAT3_HUMAN HEAT repeat-containing protein 3
8601	hIP191-14	hIP191-14	MePCE	[131]		P62753	7	10	36.1	2.45	5.9e-05	28680.9	HOMO SAPIENS	RS6_HUMAN 40S ribosomal protein S6
8602	hIP191-14	hIP191-14	MePCE	[132]		P63261	6	7	18.9	3.28	3.7e-07	41793.2	HOMO SAPIENS	ACTG_HUMAN Actin, cytoplasmic 2
8603	hIP191-14	hIP191-14	MePCE	[132-1]	0	P60709	5	6	14.1	2.47	4.9e-06	41737.1	HOMO SAPIENS	ACTB_HUMAN Actin, cytoplasmic 1
8604	hIP191-14	hIP191-14	MePCE	[132-2]	0	P62736	4	5	11.4	2.47	4.9e-06	42009.4	HOMO SAPIENS	ACTA_HUMAN Actin, aortic smooth muscle
8605	hIP191-14	hIP191-14	MePCE	[132-3]	0	P63267	4	5	11.4	2.47	4.9e-06	41877.3	HOMO SAPIENS	ACTH_HUMAN Actin, gamma-enteric smooth muscle
8606	hIP191-14	hIP191-14	MePCE	[132-4]	0	P68032	4	5	11.4	2.47	4.9e-06	42019.4	HOMO SAPIENS	ACTC_HUMAN Actin, alpha cardiac muscle 1
8607	hIP191-14	hIP191-14	MePCE	[132-5]	0	P68133	4	5	11.4	2.47	4.9e-06	42051.4	HOMO SAPIENS	ACTS_HUMAN Actin, alpha skeletal muscle
8608	hIP191-14	hIP191-14	MePCE	[132-6]	0	Q562R1	1	2	2.9	2.47	4.9e-06	42003.6	HOMO SAPIENS	ACTBL_HUMAN Beta-actin-like protein 2
8609	hIP191-14	hIP191-14	MePCE	[133]		Q86V81	5	5	22.2	4.33	3.4e-08	26888.1	HOMO SAPIENS	THOC4_HUMAN THO complex subunit 4
8610	hIP191-14	hIP191-14	MePCE	[134]		P62805	4	5	40.8	3.84	1.8e-05	11367.4	HOMO SAPIENS	H4_HUMAN Histone H4
8611	hIP191-14	hIP191-14	MePCE	[135]		P62979	4	7	26.9	4.22	9.6e-08	17965.1	HOMO SAPIENS	RS27A_HUMAN Ubiquitin-40S ribosomal protein S27a
8612	hIP191-14	hIP191-14	MePCE	[136]		P35268	4	4	39.1	3.87	2.1e-06	14787.1	HOMO SAPIENS	RL22_HUMAN 60S ribosomal protein L22
8613	hIP191-14	hIP191-14	MePCE	[137]		Q15393	6	6	6.7	2.85	2.9e-06	135578	HOMO SAPIENS	SF3B3_HUMAN Splicing factor 3B subunit 3
8614	hIP191-14	hIP191-14	MePCE	[138]		P62191	3	3	11.6	5.06	2e-08	49184.9	HOMO SAPIENS	PRS4_HUMAN 26S protease regulatory subunit 4
8615	hIP191-14	hIP191-14	MePCE	[139]		Q12906	7	7	15.3	2.71	5.6e-06	95339.2	HOMO SAPIENS	ILF3_HUMAN Interleukin enhancer-binding factor 3
8616	hIP191-14	hIP191-14	MePCE	[139-1]	0	Q96SI9	1	1	1.6	0.48	0.0022	73653.2	HOMO SAPIENS	STRBP_HUMAN Spermatid perinuclear RNA-binding protein
8617	hIP191-14	hIP191-14	MePCE	[140]		Q14011	3	3	32	5.59	5.8e-10	18648.1	HOMO SAPIENS	CIRBP_HUMAN Cold-inducible RNA-binding protein
8618	hIP191-14	hIP191-14	MePCE	[141]		Q1KMD3	4	4	9.8	4.04	2.7e-07	85105.4	HOMO SAPIENS	HNRL2_HUMAN Heterogeneous nuclear ribonucleoprotein U-like protein 2
8619	hIP191-14	hIP191-14	MePCE	[142]		P62906	4	6	17.1	4.04	5.7e-07	24831.5	HOMO SAPIENS	RL10A_HUMAN 60S ribosomal protein L10a
8620	hIP191-14	hIP191-14	MePCE	[143]		Q99733	3	3	12	4.94	3.7e-08	42823.8	HOMO SAPIENS	NP1L4_HUMAN Nucleosome assembly protein 1-like 4
8621	hIP191-14	hIP191-14	MePCE	[144]		P82912	3	5	31.4	5.05	1e-08	20615.9	HOMO SAPIENS	RT11_HUMAN 28S ribosomal protein S11, mitochondrial
8622	hIP191-14	hIP191-14	MePCE	[145]		P46776	4	7	22.3	3.39	7.3e-06	16561.5	HOMO SAPIENS	RL27A_HUMAN 60S ribosomal protein L27a
8623	hIP191-14	hIP191-14	MePCE	[146]		P17844	7	7	16.3	2.39	1.4e-05	69148.7	HOMO SAPIENS	DDX5_HUMAN Probable ATP-dependent RNA helicase DDX5
8624	hIP191-14	hIP191-14	MePCE	[146-1]	2	Q92841	5	5	9.4	1.84	0.00023	72372.1	HOMO SAPIENS	DDX17_HUMAN Probable ATP-dependent RNA helicase DDX17
8625	hIP191-14	hIP191-14	MePCE	[147]		P84098	2	4	9.2	6.6	1.1e-09	23466.2	HOMO SAPIENS	RL19_HUMAN 60S ribosomal protein L19
8626	hIP191-14	hIP191-14	MePCE	[148]		P35998	6	6	19.6	2.72	9.1e-06	48634.3	HOMO SAPIENS	PRS7_HUMAN 26S protease regulatory subunit 7
8627	hIP191-14	hIP191-14	MePCE	[149]		P10155	4	4	12.1	3.74	4.1e-08	60671.2	HOMO SAPIENS	RO60_HUMAN 60 kDa SS-A/Ro ribonucleoprotein
8628	hIP191-14	hIP191-14	MePCE	[150]		P82663	3	3	24.9	4.72	9.7e-09	20116.6	HOMO SAPIENS	RT25_HUMAN 28S ribosomal protein S25, mitochondrial
8629	hIP191-14	hIP191-14	MePCE	[151]		Q9NXG2	3	3	13.6	4.89	1.4e-07	39315.7	HOMO SAPIENS	THUM1_HUMAN THUMP domain-containing protein 1
8630	hIP191-14	hIP191-14	MePCE	[152]		O15226	7	7	17	1.88	0.00025	77673.6	HOMO SAPIENS	NKRF_HUMAN NF-kappa-B-repressing factor
8631	hIP191-14	hIP191-14	MePCE	[153]		P62316	6	6	49.2	2.38	1.4e-05	13527	HOMO SAPIENS	SMD2_HUMAN Small nuclear ribonucleoprotein Sm D2
8632	hIP191-14	hIP191-14	MePCE	[154]		P62847	4	6	28.6	3.48	4.5e-07	15423.3	HOMO SAPIENS	RS24_HUMAN 40S ribosomal protein S24
8633	hIP191-14	hIP191-14	MePCE	[155]		P62244	6	7	53.8	2.57	2.5e-05	14839.6	HOMO SAPIENS	RS15A_HUMAN 40S ribosomal protein S15a
8634	hIP191-14	hIP191-14	MePCE	[156]		Q99460	7	7	13.7	1.99	6.8e-05	105837	HOMO SAPIENS	PSMD1_HUMAN 26S proteasome non-ATPase regulatory subunit 1
8635	hIP191-14	hIP191-14	MePCE	[157]		Q9Y4Z0	4	7	35.3	4.1	6.3e-08	15349.9	HOMO SAPIENS	LSM4_HUMAN U6 snRNA-associated Sm-like protein LSm4
8636	hIP191-14	hIP191-14	MePCE	[158]		O43447	4	5	33.9	4.03	2.2e-07	19208.3	HOMO SAPIENS	PPIH_HUMAN Peptidyl-prolyl cis-trans isomerase H
8637	hIP191-14	hIP191-14	MePCE	[159]		P29692	4	4	17.1	3.99	1.4e-07	31122.1	HOMO SAPIENS	EF1D_HUMAN Elongation factor 1-delta
8638	hIP191-14	hIP191-14	MePCE	[159-1]	2	P24534	3	5	24	1.86	4e-05	24763.9	HOMO SAPIENS	EF1B_HUMAN Elongation factor 1-beta
8639	hIP191-14	hIP191-14	MePCE	[160]		P60660	5	6	42.4	3.33	2.6e-06	16930.2	HOMO SAPIENS	MYL6_HUMAN Myosin light polypeptide 6
8640	hIP191-14	hIP191-14	MePCE	[160-1]	0	P14649	2	2	11.5	3.33	2.6e-06	22764.2	HOMO SAPIENS	MYL6B_HUMAN Myosin light chain 6B
8641	hIP191-14	hIP191-14	MePCE	[161]		P23246	4	4	11.6	4.1	2.6e-08	76150	HOMO SAPIENS	SFPQ_HUMAN Splicing factor, proline- and glutamine-rich
8642	hIP191-14	hIP191-14	MePCE	[162]		P0C0S8	3	5	30	4.35	1.9e-06	14091.6	HOMO SAPIENS	H2A1_HUMAN Histone H2A type 1
8643	hIP191-14	hIP191-14	MePCE	[162-1]	0	P20671	3	5	30	4.35	1.9e-06	14107.6	HOMO SAPIENS	H2A1D_HUMAN Histone H2A type 1-D
8644	hIP191-14	hIP191-14	MePCE	[162-2]	0	Q16777	3	5	30.2	4.35	1.9e-06	13988.5	HOMO SAPIENS	H2A2C_HUMAN Histone H2A type 2-C
8645	hIP191-14	hIP191-14	MePCE	[162-3]	0	Q6FI13	3	5	30	4.35	1.9e-06	14095.6	HOMO SAPIENS	H2A2A_HUMAN Histone H2A type 2-A
8646	hIP191-14	hIP191-14	MePCE	[162-4]	0	Q96KK5	3	5	30.5	4.35	1.9e-06	13906.4	HOMO SAPIENS	H2A1H_HUMAN Histone H2A type 1-H
8647	hIP191-14	hIP191-14	MePCE	[162-5]	0	Q99878	3	5	30.5	4.35	1.9e-06	13936.4	HOMO SAPIENS	H2A1J_HUMAN Histone H2A type 1-J
8648	hIP191-14	hIP191-14	MePCE	[162-6]	0	Q9BTM1	3	5	30.2	4.35	1.9e-06	14019.5	HOMO SAPIENS	H2AJ_HUMAN Histone H2A.J
8649	hIP191-14	hIP191-14	MePCE	[162-7]	0	P04908	2	4	21.5	4.35	1.9e-06	14135.6	HOMO SAPIENS	H2A1B_HUMAN Histone H2A type 1-B/E
8650	hIP191-14	hIP191-14	MePCE	[162-8]	0	Q7L7L0	2	4	21.5	4.35	1.9e-06	14121.6	HOMO SAPIENS	H2A3_HUMAN Histone H2A type 3
8651	hIP191-14	hIP191-14	MePCE	[162-9]	0	Q93077	2	4	21.5	4.35	1.9e-06	14105.6	HOMO SAPIENS	H2A1C_HUMAN Histone H2A type 1-C
8652	hIP191-14	hIP191-14	MePCE	[163]		Q9H2U1	5	5	7.9	2.51	5e-05	114761	HOMO SAPIENS	DHX36_HUMAN Probable ATP-dependent RNA helicase DHX36
8653	hIP191-14	hIP191-14	MePCE	[164]		O60930	4	4	20.3	3.8	7.4e-07	32064.5	HOMO SAPIENS	RNH1_HUMAN Ribonuclease H1
8654	hIP191-14	hIP191-14	MePCE	[165]		Q9Y676	4	5	27.1	3.11	4e-05	29395.8	HOMO SAPIENS	RT18B_HUMAN 28S ribosomal protein S18b, mitochondrial
8655	hIP191-14	hIP191-14	MePCE	[166]		P55769	3	4	31.2	3.83	6.5e-06	14173.7	HOMO SAPIENS	NH2L1_HUMAN NHP2-like protein 1
8656	hIP191-14	hIP191-14	MePCE	[167]		P46778	3	5	27.5	4.13	6.9e-07	18565	HOMO SAPIENS	RL21_HUMAN 60S ribosomal protein L21
8657	hIP191-14	hIP191-14	MePCE	[168]		P62851	4	6	21.6	3.03	6.7e-05	13742.2	HOMO SAPIENS	RS25_HUMAN 40S ribosomal protein S25
8658	hIP191-14	hIP191-14	MePCE	[169]		Q9H3K6	3	6	51.2	4.97	8.5e-09	10116.6	HOMO SAPIENS	BOLA2_HUMAN BolA-like protein 2
8659	hIP191-14	hIP191-14	MePCE	[170]		P21333	7	7	5.4	1.72	0.00019	280741	HOMO SAPIENS	FLNA_HUMAN Filamin-A
8660	hIP191-14	hIP191-14	MePCE	[171]		P13639	6	7	10.7	2.3	7.3e-05	95339	HOMO SAPIENS	EF2_HUMAN Elongation factor 2
8661	hIP191-14	hIP191-14	MePCE	[172]		P16403	5	6	21.1	2.99	5.4e-07	21364.9	HOMO SAPIENS	H12_HUMAN Histone H1.2
8662	hIP191-14	hIP191-14	MePCE	[172-1]	1	P10412	4	5	18.7	2.09	1.5e-05	21865.4	HOMO SAPIENS	H14_HUMAN Histone H1.4
8663	hIP191-14	hIP191-14	MePCE	[172-2]	0	P16402	3	4	10.9	1.6	0.00029	22350.1	HOMO SAPIENS	H13_HUMAN Histone H1.3
8664	hIP191-14	hIP191-14	MePCE	[172-3]	0	P22492	1	1	5.3	1.58	0.00034	22019.2	HOMO SAPIENS	H1T_HUMAN Histone H1t
8665	hIP191-14	hIP191-14	MePCE	[172-4]	0	Q02539	1	1	5.1	1.58	0.00034	21842.3	HOMO SAPIENS	H11_HUMAN Histone H1.1
8666	hIP191-14	hIP191-14	MePCE	[173]		P51991	2	2	10.1	6.66	3.4e-12	39595.3	HOMO SAPIENS	ROA3_HUMAN Heterogeneous nuclear ribonucleoprotein A3
8667	hIP191-14	hIP191-14	MePCE	[174]		O00232	4	4	11.4	3.42	6.2e-06	52904.9	HOMO SAPIENS	PSD12_HUMAN 26S proteasome non-ATPase regulatory subunit 12
8668	hIP191-14	hIP191-14	MePCE	[175]		O75533	6	6	7.2	2.03	0.00022	145832	HOMO SAPIENS	SF3B1_HUMAN Splicing factor 3B subunit 1
8669	hIP191-14	hIP191-14	MePCE	[176]		P18124	4	4	12.5	2.96	0.00034	29226	HOMO SAPIENS	RL7_HUMAN 60S ribosomal protein L7
8670	hIP191-14	hIP191-14	MePCE	[177]		Q9UMS4	5	5	27.4	2.68	2.5e-05	55181.3	HOMO SAPIENS	PRP19_HUMAN Pre-mRNA-processing factor 19
8671	hIP191-14	hIP191-14	MePCE	[178]		P62266	3	4	32.9	3.67	3.8e-06	15807.7	HOMO SAPIENS	RS23_HUMAN 40S ribosomal protein S23
8672	hIP191-14	hIP191-14	MePCE	[179]		P05141	4	4	15.8	3.13	8.8e-07	32852.5	HOMO SAPIENS	ADT2_HUMAN ADP/ATP translocase 2
8673	hIP191-14	hIP191-14	MePCE	[179-1]	0	P12235	2	2	6.7	3.09	8.8e-07	33064.8	HOMO SAPIENS	ADT1_HUMAN ADP/ATP translocase 1
8674	hIP191-14	hIP191-14	MePCE	[179-2]	0	P12236	2	2	6.7	3.09	8.8e-07	32866.6	HOMO SAPIENS	ADT3_HUMAN ADP/ATP translocase 3
8675	hIP191-14	hIP191-14	MePCE	[179-3]	0	Q9H0C2	2	2	6.3	3.09	8.8e-07	35022.2	HOMO SAPIENS	ADT4_HUMAN ADP/ATP translocase 4
8676	hIP191-14	hIP191-14	MePCE	[180]		P05386	2	4	51.8	4.75	3.9e-08	11514	HOMO SAPIENS	RLA1_HUMAN 60S acidic ribosomal protein P1
8677	hIP191-14	hIP191-14	MePCE	[181]		P63220	4	5	62.7	2.78	2.2e-05	9111.5	HOMO SAPIENS	RS21_HUMAN 40S ribosomal protein S21
8678	hIP191-14	hIP191-14	MePCE	[182]		P62854	3	4	36.5	4.31	1.3e-07	13015.5	HOMO SAPIENS	RS26_HUMAN 40S ribosomal protein S26
8679	hIP191-14	hIP191-14	MePCE	[182-1]	0	Q5JNZ5	2	2	23.5	1.4	0.0042	13002.5	HOMO SAPIENS	RS26L_HUMAN Putative 40S ribosomal protein S26-like 1
8680	hIP191-14	hIP191-14	MePCE	[183]		Q02543	3	4	17.6	4.05	5.7e-07	20762.6	HOMO SAPIENS	RL18A_HUMAN 60S ribosomal protein L18a
8681	hIP191-14	hIP191-14	MePCE	[184]		P19784	3	3	15.1	4.52	2e-08	41213.6	HOMO SAPIENS	CSK22_HUMAN Casein kinase II subunit alpha'
8682	hIP191-14	hIP191-14	MePCE	[185]		Q9HCE1	4	4	4.6	2.93	3.9e-06	113672	HOMO SAPIENS	MOV10_HUMAN Putative helicase MOV-10
8683	hIP191-14	hIP191-14	MePCE	[186]		Q12905	6	7	20.8	1.92	0.00054	43062.5	HOMO SAPIENS	ILF2_HUMAN Interleukin enhancer-binding factor 2
8684	hIP191-14	hIP191-14	MePCE	[187]		Q04837	2	2	20.3	5.06	1.3e-08	17259.8	HOMO SAPIENS	SSBP_HUMAN Single-stranded DNA-binding protein, mitochondrial
8685	hIP191-14	hIP191-14	MePCE	[188]		P82914	5	5	16	2.19	4.9e-05	29842.4	HOMO SAPIENS	RT15_HUMAN 28S ribosomal protein S15, mitochondrial
8686	hIP191-14	hIP191-14	MePCE	[189]		P18621	5	9	31.5	2.4	3.2e-05	21397.2	HOMO SAPIENS	RL17_HUMAN 60S ribosomal protein L17
8687	hIP191-14	hIP191-14	MePCE	[190]		Q9Y3D9	5	5	30	2.2	0.0001	21770.8	HOMO SAPIENS	RT23_HUMAN 28S ribosomal protein S23, mitochondrial
8688	hIP191-14	hIP191-14	MePCE	[191]		O43242	4	4	8.4	2.82	3.7e-06	60978.1	HOMO SAPIENS	PSMD3_HUMAN 26S proteasome non-ATPase regulatory subunit 3
8689	hIP191-14	hIP191-14	MePCE	[192]		P12956	6	7	13.3	1.82	0.00019	69843.7	HOMO SAPIENS	XRCC6_HUMAN X-ray repair cross-complementing protein 6
8690	hIP191-14	hIP191-14	MePCE	[193]		Q9BUL9	3	3	30.2	3.52	2.1e-06	20632.6	HOMO SAPIENS	RPP25_HUMAN Ribonuclease P protein subunit p25
8691	hIP191-14	hIP191-14	MePCE	[194]		P61254	6	9	29	1.85	0.0003	17258.4	HOMO SAPIENS	RL26_HUMAN 60S ribosomal protein L26
8692	hIP191-14	hIP191-14	MePCE	[194-1]	0	Q9UNX3	4	6	17.2	1.62	0.0012	17256.4	HOMO SAPIENS	RL26L_HUMAN 60S ribosomal protein L26-like 1
8693	hIP191-14	hIP191-14	MePCE	[195]		O00231	3	3	8.8	3	3.5e-05	47464.2	HOMO SAPIENS	PSD11_HUMAN 26S proteasome non-ATPase regulatory subunit 11
8694	hIP191-14	hIP191-14	MePCE	[196]		Q96DC7	4	6	14.2	2.61	0.00011	54442.6	HOMO SAPIENS	TMCO6_HUMAN Transmembrane and coiled-coil domain-containing protein 6
8695	hIP191-14	hIP191-14	MePCE	[197]		Q00610	8	8	6.8	1.83	3.4e-05	191616	HOMO SAPIENS	CLH1_HUMAN Clathrin heavy chain 1
8696	hIP191-14	hIP191-14	MePCE	[197-1]	1	P53675	2	2	1.5	0.45	0.0071	187032	HOMO SAPIENS	CLH2_HUMAN Clathrin heavy chain 2
8697	hIP191-14	hIP191-14	MePCE	[198]		Q9BYN8	4	4	19.5	2.61	3.6e-05	24211.9	HOMO SAPIENS	RT26_HUMAN 28S ribosomal protein S26, mitochondrial
8698	hIP191-14	hIP191-14	MePCE	[199]		P82930	4	4	26.6	3.33	3.1e-07	25650.7	HOMO SAPIENS	RT34_HUMAN 28S ribosomal protein S34, mitochondrial
8699	hIP191-14	hIP191-14	MePCE	[200]		P62857	3	4	46.4	2.98	6.6e-05	7841.1	HOMO SAPIENS	RS28_HUMAN 40S ribosomal protein S28
8700	hIP191-14	hIP191-14	MePCE	[201]		P40429	4	4	21.2	2.37	7.5e-05	23577.4	HOMO SAPIENS	RL13A_HUMAN 60S ribosomal protein L13a
8701	hIP191-14	hIP191-14	MePCE	[201-1]	0	Q6NVV1	1	1	10.8	1.9	0.00012	12134.7	HOMO SAPIENS	R13AX_HUMAN Putative 60S ribosomal protein L13a-like MGC87657
8702	hIP191-14	hIP191-14	MePCE	[202]		P62195	2	3	7.1	4.63	5.6e-08	45626.4	HOMO SAPIENS	PRS8_HUMAN 26S protease regulatory subunit 8
8703	hIP191-14	hIP191-14	MePCE	[203]		P14678	3	4	14.6	3.21	2e-06	24610.3	HOMO SAPIENS	RSMB_HUMAN Small nuclear ribonucleoprotein-associated proteins B and B'
8704	hIP191-14	hIP191-14	MePCE	[203-1]	0	P63162	3	4	14.6	3.21	2e-06	24614.3	HOMO SAPIENS	RSMN_HUMAN Small nuclear ribonucleoprotein-associated protein N
8705	hIP191-14	hIP191-14	MePCE	[204]		Q8NC51	2	2	6.6	4.86	3.5e-08	44965.7	HOMO SAPIENS	PAIRB_HUMAN Plasminogen activator inhibitor 1 RNA-binding protein
8706	hIP191-14	hIP191-14	MePCE	[205]		Q07020	3	3	18.6	3.21	7.2e-06	21634.7	HOMO SAPIENS	RL18_HUMAN 60S ribosomal protein L18
8707	hIP191-14	hIP191-14	MePCE	[206]		Q9H814	4	4	14.2	2.39	0.00015	44402.9	HOMO SAPIENS	PHAX_HUMAN Phosphorylated adapter RNA export protein
8708	hIP191-14	hIP191-14	MePCE	[207]		P62910	2	2	21.5	4.91	7.1e-09	15859.9	HOMO SAPIENS	RL32_HUMAN 60S ribosomal protein L32
8709	hIP191-14	hIP191-14	MePCE	[208]		Q99575	5	5	6	2.01	9.7e-05	114710	HOMO SAPIENS	POP1_HUMAN Ribonucleases P/MRP protein subunit POP1
8710	hIP191-14	hIP191-14	MePCE	[209]		Q9H2W6	2	2	9.7	3.68	2.2e-06	31705.4	HOMO SAPIENS	RM46_HUMAN 39S ribosomal protein L46, mitochondrial
8711	hIP191-14	hIP191-14	MePCE	[210]		P62318	2	2	24.6	4.34	2.2e-07	13916.4	HOMO SAPIENS	SMD3_HUMAN Small nuclear ribonucleoprotein Sm D3
8712	hIP191-14	hIP191-14	MePCE	[211]		Q9UNN5	5	5	10.2	1.97	0.00051	73954.8	HOMO SAPIENS	FAF1_HUMAN FAS-associated factor 1
8713	hIP191-14	hIP191-14	MePCE	[212]		P40227	4	4	8.9	2.44	3e-05	58024.7	HOMO SAPIENS	TCPZ_HUMAN T-complex protein 1 subunit zeta
8714	hIP191-14	hIP191-14	MePCE	[213]		P42766	3	5	18.7	2.72	1.1e-05	14551.6	HOMO SAPIENS	RL35_HUMAN 60S ribosomal protein L35
8715	hIP191-14	hIP191-14	MePCE	[214]		Q13200	3	3	4.7	3.59	3e-07	100201	HOMO SAPIENS	PSMD2_HUMAN 26S proteasome non-ATPase regulatory subunit 2
8716	hIP191-14	hIP191-14	MePCE	[215]		P48047	5	5	25.8	1.85	0.00013	23277.5	HOMO SAPIENS	ATPO_HUMAN ATP synthase subunit O, mitochondrial
8717	hIP191-14	hIP191-14	MePCE	[216]		Q09028	2	2	5.4	4.68	1.4e-08	47656.1	HOMO SAPIENS	RBBP4_HUMAN Histone-binding protein RBBP4
8718	hIP191-14	hIP191-14	MePCE	[217]		P40926	5	5	21.6	1.79	0.0002	35503.6	HOMO SAPIENS	MDHM_HUMAN Malate dehydrogenase, mitochondrial
8719	hIP191-14	hIP191-14	MePCE	[218]		P52815	2	4	23.2	3.63	1.2e-05	21348.4	HOMO SAPIENS	RM12_HUMAN 39S ribosomal protein L12, mitochondrial
8720	hIP191-14	hIP191-14	MePCE	[219]		P17980	4	4	15	2.13	2.4e-05	49204	HOMO SAPIENS	PRS6A_HUMAN 26S protease regulatory subunit 6A
8721	hIP191-14	hIP191-14	MePCE	[220]		P62273	3	3	48.2	3.17	1.2e-06	6676.8	HOMO SAPIENS	RS29_HUMAN 40S ribosomal protein S29
8722	hIP191-14	hIP191-14	MePCE	[221]		Q96DH6	2	2	9.5	3.6	2.9e-06	35197	HOMO SAPIENS	MSI2H_HUMAN RNA-binding protein Musashi homolog 2
8723	hIP191-14	hIP191-14	MePCE	[222]		P32969	3	3	22.4	2.3	0.00047	21863.6	HOMO SAPIENS	RL9_HUMAN 60S ribosomal protein L9
8724	hIP191-14	hIP191-14	MePCE	[223]		Q9Y333	2	3	28.4	3.86	4.4e-06	10834.6	HOMO SAPIENS	LSM2_HUMAN U6 snRNA-associated Sm-like protein LSm2
8725	hIP191-14	hIP191-14	MePCE	[224]		P42677	3	4	38.1	2.74	1.3e-05	9461.2	HOMO SAPIENS	RS27_HUMAN 40S ribosomal protein S27
8726	hIP191-14	hIP191-14	MePCE	[224-1]	0	Q71UM5	2	3	25	2.74	1.3e-05	9477.3	HOMO SAPIENS	RS27L_HUMAN 40S ribosomal protein S27-like
8727	hIP191-14	hIP191-14	MePCE	[225]		Q7L0Y3	2	2	10.4	3.61	1.3e-07	47347.4	HOMO SAPIENS	MRRP1_HUMAN Mitochondrial ribonuclease P protein 1
8728	hIP191-14	hIP191-14	MePCE	[226]		Q9Y2Q9	4	4	21.4	1.98	0.00024	20843	HOMO SAPIENS	RT28_HUMAN 28S ribosomal protein S28, mitochondrial
8729	hIP191-14	hIP191-14	MePCE	[227]		Q6P161	3	5	48.6	2.43	2.8e-05	15819.3	HOMO SAPIENS	RM54_HUMAN 39S ribosomal protein L54, mitochondrial
8730	hIP191-14	hIP191-14	MePCE	[228]		Q9UNM6	6	6	19.1	1.26	0.0012	42945.9	HOMO SAPIENS	PSD13_HUMAN 26S proteasome non-ATPase regulatory subunit 13
8731	hIP191-14	hIP191-14	MePCE	[229]		P24752	3	3	11.2	2.64	4.8e-06	45200	HOMO SAPIENS	THIL_HUMAN Acetyl-CoA acetyltransferase, mitochondrial
8732	hIP191-14	hIP191-14	MePCE	[230]		Q8ND56	2	2	10.8	3.28	2.3e-05	50530.2	HOMO SAPIENS	LS14A_HUMAN Protein LSM14 homolog A
8733	hIP191-14	hIP191-14	MePCE	[231]		Q01105	2	2	8.3	3.8	3.1e-07	33489.1	HOMO SAPIENS	SET_HUMAN Protein SET
8734	hIP191-14	hIP191-14	MePCE	[232]		Q8WUB8	4	4	9.6	1.92	0.00012	56051.4	HOMO SAPIENS	PHF10_HUMAN PHD finger protein 10
8735	hIP191-14	hIP191-14	MePCE	[233]		P82921	2	2	29.9	3.04	4.9e-06	10741.7	HOMO SAPIENS	RT21_HUMAN 28S ribosomal protein S21, mitochondrial
8736	hIP191-14	hIP191-14	MePCE	[234]		P60866	3	6	22.7	2.38	4e-05	13372.8	HOMO SAPIENS	RS20_HUMAN 40S ribosomal protein S20
8737	hIP191-14	hIP191-14	MePCE	[235]		Q01081	3	3	19.2	2.54	5.9e-06	27872.3	HOMO SAPIENS	U2AF1_HUMAN Splicing factor U2AF 35 kDa subunit
8738	hIP191-14	hIP191-14	MePCE	[235-1]	0	Q8WU68	1	1	6.8	1.19	0.00042	25743.9	HOMO SAPIENS	U2AF4_HUMAN Splicing factor U2AF 26 kDa subunit
8739	hIP191-14	hIP191-14	MePCE	[236]		P55884	4	4	6	2.49	4.3e-06	92482.4	HOMO SAPIENS	EIF3B_HUMAN Eukaryotic translation initiation factor 3 subunit B
8740	hIP191-14	hIP191-14	MePCE	[237]		P61353	4	5	36	2.02	2.6e-05	15797.9	HOMO SAPIENS	RL27_HUMAN 60S ribosomal protein L27
8741	hIP191-14	hIP191-14	MePCE	[238]		Q02878	3	3	14.2	2.26	3.5e-05	32728.2	HOMO SAPIENS	RL6_HUMAN 60S ribosomal protein L6
8742	hIP191-14	hIP191-14	MePCE	[239]		Q00577	3	3	36	2.45	8.6e-05	34911	HOMO SAPIENS	PURA_HUMAN Transcriptional activator protein Pur-alpha
8743	hIP191-14	hIP191-14	MePCE	[240]		Q9BYD3	2	2	13.2	3.47	4.5e-06	34919.5	HOMO SAPIENS	RM04_HUMAN 39S ribosomal protein L4, mitochondrial
8744	hIP191-14	hIP191-14	MePCE	[241]		Q9BZE1	4	4	16.3	1.87	0.0003	48117.9	HOMO SAPIENS	RM37_HUMAN 39S ribosomal protein L37, mitochondrial
8745	hIP191-14	hIP191-14	MePCE	[242]		O15355	4	5	11.7	1.87	9.5e-05	59272.1	HOMO SAPIENS	PPM1G_HUMAN Protein phosphatase 1G
8746	hIP191-14	hIP191-14	MePCE	[243]		P61513	2	2	28.3	3.41	8.2e-07	10275.4	HOMO SAPIENS	RL37A_HUMAN 60S ribosomal protein L37a
8747	hIP191-14	hIP191-14	MePCE	[243-1]	0	A6NKH3	1	1	8.6	0.43	0.0018	10582.7	HOMO SAPIENS	RL37L_HUMAN Putative 60S ribosomal protein L37a-like
8748	hIP191-14	hIP191-14	MePCE	[244]		P07910	2	2	9.2	2.92	3.7e-05	33670.3	HOMO SAPIENS	HNRPC_HUMAN Heterogeneous nuclear ribonucleoproteins C1/C2
8749	hIP191-14	hIP191-14	MePCE	[244-1]	0	O60812	1	1	4.1	1.7	0.00024	32142.6	HOMO SAPIENS	HNRCL_HUMAN Heterogeneous nuclear ribonucleoprotein C-like 1
8750	hIP191-14	hIP191-14	MePCE	[245]		P27348	2	2	10.6	3.5	7e-06	27764.5	HOMO SAPIENS	1433T_HUMAN 14-3-3 protein theta
8751	hIP191-14	hIP191-14	MePCE	[246]		Q6ZN17	3	3	19.6	2.49	3.1e-05	27083.9	HOMO SAPIENS	LN28B_HUMAN Protein lin-28 homolog B
8752	hIP191-14	hIP191-14	MePCE	[247]		P62899	3	4	32.8	2.02	0.001	14463	HOMO SAPIENS	RL31_HUMAN 60S ribosomal protein L31
8753	hIP191-14	hIP191-14	MePCE	[248]		P43686	2	2	17.5	3.41	2.1e-06	47366.7	HOMO SAPIENS	PRS6B_HUMAN 26S protease regulatory subunit 6B
8754	hIP191-14	hIP191-14	MePCE	[249]		Q9BYG3	2	2	10.9	3.27	1.4e-06	34222.5	HOMO SAPIENS	MK67I_HUMAN MKI67 FHA domain-interacting nucleolar phosphoprotein
8755	hIP191-14	hIP191-14	MePCE	[250]		Q14152	4	4	4.3	1.82	6.6e-05	166571	HOMO SAPIENS	EIF3A_HUMAN Eukaryotic translation initiation factor 3 subunit A
8756	hIP191-14	hIP191-14	MePCE	[251]		Q9Y399	4	4	22.3	1.69	0.00016	33249.5	HOMO SAPIENS	RT02_HUMAN 28S ribosomal protein S2, mitochondrial
8757	hIP191-14	hIP191-14	MePCE	[252]		O95347	5	5	6.1	1.74	4.7e-05	135657	HOMO SAPIENS	SMC2_HUMAN Structural maintenance of chromosomes protein 2
8758	hIP191-14	hIP191-14	MePCE	[253]		Q9Y3D3	5	7	37.2	1.35	0.00085	15345	HOMO SAPIENS	RT16_HUMAN 28S ribosomal protein S16, mitochondrial
8759	hIP191-14	hIP191-14	MePCE	[254]		P49458	3	4	24.4	2.57	4.3e-06	10111.8	HOMO SAPIENS	SRP09_HUMAN Signal recognition particle 9 kDa protein
8760	hIP191-14	hIP191-14	MePCE	[255]		Q15717	2	2	7.4	2.88	4.1e-06	36092.2	HOMO SAPIENS	ELAV1_HUMAN ELAV-like protein 1
8761	hIP191-14	hIP191-14	MePCE	[256]		Q14493	4	4	34.1	1.44	0.00058	31285.9	HOMO SAPIENS	SLBP_HUMAN Histone RNA hairpin-binding protein
8762	hIP191-14	hIP191-14	MePCE	[257]		Q9BQ67	2	2	8.3	3.16	5e-07	49419.6	HOMO SAPIENS	GRWD1_HUMAN Glutamate-rich WD repeat-containing protein 1
8763	hIP191-14	hIP191-14	MePCE	[258]		P62310	2	3	29.4	3.18	1.4e-06	11845.5	HOMO SAPIENS	LSM3_HUMAN U6 snRNA-associated Sm-like protein LSm3
8764	hIP191-14	hIP191-14	MePCE	[259]		P62314	3	5	37.8	1.79	0.0005	13281.7	HOMO SAPIENS	SMD1_HUMAN Small nuclear ribonucleoprotein Sm D1
8765	hIP191-14	hIP191-14	MePCE	[260]		Q6P158	2	2	1.7	3.09	5.2e-06	155606	HOMO SAPIENS	DHX57_HUMAN Putative ATP-dependent RNA helicase DHX57
8766	hIP191-14	hIP191-14	MePCE	[261]		P78346	1	1	7.5	4.9	3e-08	29321.5	HOMO SAPIENS	RPP30_HUMAN Ribonuclease P protein subunit p30
8767	hIP191-14	hIP191-14	MePCE	[262]		P61163	2	2	8.5	2.66	2.3e-05	42614.1	HOMO SAPIENS	ACTZ_HUMAN Alpha-centractin
8768	hIP191-14	hIP191-14	MePCE	[262-1]	1	P42025	2	2	10.1	2.66	2.3e-05	42293.8	HOMO SAPIENS	ACTY_HUMAN Beta-centractin
8769	hIP191-14	hIP191-14	MePCE	[263]		Q9Y295	2	2	6.5	2.81	2.5e-05	40542.5	HOMO SAPIENS	DRG1_HUMAN Developmentally-regulated GTP-binding protein 1
8770	hIP191-14	hIP191-14	MePCE	[264]		P47914	1	1	9.4	4.72	2.1e-08	17752.2	HOMO SAPIENS	RL29_HUMAN 60S ribosomal protein L29
8771	hIP191-14	hIP191-14	MePCE	[265]		O76094	2	2	4.9	2.87	2.3e-06	74606.8	HOMO SAPIENS	SRP72_HUMAN Signal recognition particle 72 kDa protein
8772	hIP191-14	hIP191-14	MePCE	[266]		Q00059	3	3	10.2	1.98	0.00013	29096.9	HOMO SAPIENS	TFAM_HUMAN Transcription factor A, mitochondrial
8773	hIP191-14	hIP191-14	MePCE	[267]		P09661	4	4	19.2	1.37	0.00092	28415.8	HOMO SAPIENS	RU2A_HUMAN U2 small nuclear ribonucleoprotein A'
8774	hIP191-14	hIP191-14	MePCE	[268]		Q9Y2R9	3	3	15.7	1.96	0.0002	28134.3	HOMO SAPIENS	RT07_HUMAN 28S ribosomal protein S7, mitochondrial
8775	hIP191-14	hIP191-14	MePCE	[269]		P46779	3	5	21.2	1.83	0.00031	15747.6	HOMO SAPIENS	RL28_HUMAN 60S ribosomal protein L28
8776	hIP191-14	hIP191-14	MePCE	[270]		Q15427	1	1	3.3	4.57	1.8e-08	44386.1	HOMO SAPIENS	SF3B4_HUMAN Splicing factor 3B subunit 4
8777	hIP191-14	hIP191-14	MePCE	[271]		Q07065	2	2	5.6	2.28	0.0003	66023	HOMO SAPIENS	CKAP4_HUMAN Cytoskeleton-associated protein 4
8778	hIP191-14	hIP191-14	MePCE	[272]		O60783	3	4	28.9	1.72	0.00049	15138.9	HOMO SAPIENS	RT14_HUMAN 28S ribosomal protein S14, mitochondrial
8779	hIP191-14	hIP191-14	MePCE	[273]		Q99613	2	2	3.3	2.89	1.1e-05	105345	HOMO SAPIENS	EIF3C_HUMAN Eukaryotic translation initiation factor 3 subunit C
8780	hIP191-14	hIP191-14	MePCE	[274]		P01614	1	2	11.3	4.49	1.9e-08	12676.4	HOMO SAPIENS	KV201_HUMAN Ig kappa chain V-II region Cum
8781	hIP191-14	hIP191-14	MePCE	[274-1]	0	P01617	1	2	11.5	4.49	1.9e-08	12317	HOMO SAPIENS	KV204_HUMAN Ig kappa chain V-II region TEW
8782	hIP191-14	hIP191-14	MePCE	[274-2]	0	P06309	1	2	11.1	4.49	1.9e-08	12664.3	HOMO SAPIENS	KV205_HUMAN Ig kappa chain V-II region GM607 (Fragment)
8783	hIP191-14	hIP191-14	MePCE	[274-3]	0	P06310	1	2	9.8	4.49	1.9e-08	14706.8	HOMO SAPIENS	KV206_HUMAN Ig kappa chain V-II region RPMI 6410
8784	hIP191-14	hIP191-14	MePCE	[275]		P23528	4	4	30.1	1.44	0.00053	18502.7	HOMO SAPIENS	COF1_HUMAN Cofilin-1
8785	hIP191-14	hIP191-14	MePCE	[276]		P49207	4	4	28.2	1.51	0.00066	13293.1	HOMO SAPIENS	RL34_HUMAN 60S ribosomal protein L34
8786	hIP191-14	hIP191-14	MePCE	[277]		O15372	1	1	5.4	4.36	5.7e-09	39930.7	HOMO SAPIENS	EIF3H_HUMAN Eukaryotic translation initiation factor 3 subunit H
8787	hIP191-14	hIP191-14	MePCE	[278]		Q13561	2	2	6.7	2.89	3.9e-06	44231.4	HOMO SAPIENS	DCTN2_HUMAN Dynactin subunit 2
8788	hIP191-14	hIP191-14	MePCE	[279]		P26373	3	4	15.2	1.72	0.00037	24261.7	HOMO SAPIENS	RL13_HUMAN 60S ribosomal protein L13
8789	hIP191-14	hIP191-14	MePCE	[280]		P52294	3	3	6.7	1.67	8.7e-05	60222.3	HOMO SAPIENS	IMA1_HUMAN Importin subunit alpha-1
8790	hIP191-14	hIP191-14	MePCE	[280-1]	0	O15131	2	2	4.7	1.67	8.7e-05	60349.5	HOMO SAPIENS	IMA5_HUMAN Importin subunit alpha-6
8791	hIP191-14	hIP191-14	MePCE	[280-2]	0	O60684	2	2	4.7	1.67	8.7e-05	60030	HOMO SAPIENS	IMA7_HUMAN Importin subunit alpha-7
8792	hIP191-14	hIP191-14	MePCE	[281]		Q9Y237	2	2	32.1	2.16	9.9e-05	13810.1	HOMO SAPIENS	PIN4_HUMAN Peptidyl-prolyl cis-trans isomerase NIMA-interacting 4
8793	hIP191-14	hIP191-14	MePCE	[282]		P55072	2	2	4	2.41	2.1e-05	89322.6	HOMO SAPIENS	TERA_HUMAN Transitional endoplasmic reticulum ATPase
8794	hIP191-14	hIP191-14	MePCE	[283]		Q9H9J2	2	2	9	2.68	2.6e-06	37535.7	HOMO SAPIENS	RM44_HUMAN 39S ribosomal protein L44, mitochondrial
8795	hIP191-14	hIP191-14	MePCE	[284]		P04406	2	2	9.6	2.44	4.5e-06	36053.5	HOMO SAPIENS	G3P_HUMAN Glyceraldehyde-3-phosphate dehydrogenase
8796	hIP191-14	hIP191-14	MePCE	[285]		Q5SSJ5	2	2	4.3	2.45	7.4e-06	61207.5	HOMO SAPIENS	HP1B3_HUMAN Heterochromatin protein 1-binding protein 3
8797	hIP191-14	hIP191-14	MePCE	[286]		P62917	1	1	6.2	3.89	5e-08	28024.9	HOMO SAPIENS	RL8_HUMAN 60S ribosomal protein L8
8798	hIP191-14	hIP191-14	MePCE	[287]		Q9P015	2	2	9.8	2.35	9.9e-06	33420.1	HOMO SAPIENS	RM15_HUMAN 39S ribosomal protein L15, mitochondrial
8799	hIP191-14	hIP191-14	MePCE	[288]		Q9BX40	1	1	4.9	3.85	1e-06	42071	HOMO SAPIENS	LS14B_HUMAN Protein LSM14 homolog B
8800	hIP191-14	hIP191-14	MePCE	[289]		Q96A35	1	1	6	3.79	1.2e-06	24915	HOMO SAPIENS	RM24_HUMAN 39S ribosomal protein L24, mitochondrial
8801	hIP191-14	hIP191-14	MePCE	[290]		O94776	2	2	4.2	2.47	8.6e-06	75023.8	HOMO SAPIENS	MTA2_HUMAN Metastasis-associated protein MTA2
8802	hIP191-14	hIP191-14	MePCE	[290-1]	0	Q13330	1	1	1.4	0.82	0.0095	80786.9	HOMO SAPIENS	MTA1_HUMAN Metastasis-associated protein MTA1
8803	hIP191-14	hIP191-14	MePCE	[290-2]	0	Q9BTC8	1	1	1.7	0.82	0.0095	67504.3	HOMO SAPIENS	MTA3_HUMAN Metastasis-associated protein MTA3
8804	hIP191-14	hIP191-14	MePCE	[291]		Q9NQ29	3	3	9.2	1.71	0.00012	43728.3	HOMO SAPIENS	LUC7L_HUMAN Putative RNA-binding protein Luc7-like 1
8805	hIP191-14	hIP191-14	MePCE	[292]		Q9Y4Y9	2	3	47.3	2.4	2.4e-05	9937.6	HOMO SAPIENS	LSM5_HUMAN U6 snRNA-associated Sm-like protein LSm5
8806	hIP191-14	hIP191-14	MePCE	[293]		P83881	3	3	24.5	1.63	0.00045	12440.9	HOMO SAPIENS	RL36A_HUMAN 60S ribosomal protein L36a
8807	hIP191-14	hIP191-14	MePCE	[294]		Q09161	3	3	6.2	1.55	0.00016	91840.3	HOMO SAPIENS	NCBP1_HUMAN Nuclear cap-binding protein subunit 1
8808	hIP191-14	hIP191-14	MePCE	[295]		P34932	2	2	3.2	2.45	2.7e-06	94331.8	HOMO SAPIENS	HSP74_HUMAN Heat shock 70 kDa protein 4
8809	hIP191-14	hIP191-14	MePCE	[296]		P62995	1	2	5.6	3.54	1.2e-07	33665.9	HOMO SAPIENS	TRA2B_HUMAN Transformer-2 protein homolog beta
8810	hIP191-14	hIP191-14	MePCE	[297]		Q04695	2	2	5.1	2.16	3.4e-05	48106.1	HOMO SAPIENS	K1C17_HUMAN Keratin, type I cytoskeletal 17
8811	hIP191-14	hIP191-14	MePCE	[297-1]	1	P19012	2	2	4.6	1.78	0.00034	49212.1	HOMO SAPIENS	K1C15_HUMAN Keratin, type I cytoskeletal 15
8812	hIP191-14	hIP191-14	MePCE	[298]		O75616	2	2	6.4	1.99	0.00024	48350.5	HOMO SAPIENS	ERAL1_HUMAN GTPase Era, mitochondrial
8813	hIP191-14	hIP191-14	MePCE	[299]		Q14203	3	3	3.2	1.68	5.2e-05	141696	HOMO SAPIENS	DCTN1_HUMAN Dynactin subunit 1
8814	hIP191-14	hIP191-14	MePCE	[300]		P00505	3	3	6.3	1.4	0.0018	47518.1	HOMO SAPIENS	AATM_HUMAN Aspartate aminotransferase, mitochondrial
8815	hIP191-14	hIP191-14	MePCE	[301]		O60884	1	1	3.2	3.27	1.4e-06	45746	HOMO SAPIENS	DNJA2_HUMAN DnaJ homolog subfamily A member 2
8816	hIP191-14	hIP191-14	MePCE	[302]		Q13405	1	1	7.8	3.25	7.7e-07	19198.2	HOMO SAPIENS	RM49_HUMAN 39S ribosomal protein L49, mitochondrial
8817	hIP191-14	hIP191-14	MePCE	[303]		P62333	3	3	10.5	1.47	0.0002	44173.4	HOMO SAPIENS	PRS10_HUMAN 26S protease regulatory subunit 10B
8818	hIP191-14	hIP191-14	MePCE	[304]		Q15208	1	1	3.7	3.17	1.4e-06	54190.7	HOMO SAPIENS	STK38_HUMAN Serine/threonine-protein kinase 38
8819	hIP191-14	hIP191-14	MePCE	[305]		Q8IY81	2	2	4.6	1.92	3.2e-05	96559.3	HOMO SAPIENS	RRMJ3_HUMAN Putative rRNA methyltransferase 3
8820	hIP191-14	hIP191-14	MePCE	[306]		P62312	2	2	23.8	2.13	1.6e-05	9127.7	HOMO SAPIENS	LSM6_HUMAN U6 snRNA-associated Sm-like protein LSm6
8821	hIP191-14	hIP191-14	MePCE	[307]		P61981	1	1	5.7	3.02	1.3e-05	28302.8	HOMO SAPIENS	1433G_HUMAN 14-3-3 protein gamma
8822	hIP191-14	hIP191-14	MePCE	[308]		Q96BP2	2	2	22.9	1.89	3.1e-05	13474.9	HOMO SAPIENS	CHCH1_HUMAN Coiled-coil-helix-coiled-coil-helix domain-containing protein 1
8823	hIP191-14	hIP191-14	MePCE	[309]		P98179	2	2	15.9	1.51	0.00045	17170.5	HOMO SAPIENS	RBM3_HUMAN Putative RNA-binding protein 3
8824	hIP191-14	hIP191-14	MePCE	[310]		Q15029	4	4	4.7	1	0.0015	109437	HOMO SAPIENS	U5S1_HUMAN 116 kDa U5 small nuclear ribonucleoprotein component
8825	hIP191-14	hIP191-14	MePCE	[311]		P25789	1	1	6.1	2.9	1.1e-06	29484.1	HOMO SAPIENS	PSA4_HUMAN Proteasome subunit alpha type-4
8826	hIP191-14	hIP191-14	MePCE	[312]		Q9NTJ3	2	2	1.9	1.8	9.2e-05	147183	HOMO SAPIENS	SMC4_HUMAN Structural maintenance of chromosomes protein 4
8827	hIP191-14	hIP191-14	MePCE	[313]		P19474	4	4	12.2	0.9	0.0053	54170.2	HOMO SAPIENS	RO52_HUMAN E3 ubiquitin-protein ligase TRIM21
8828	hIP191-14	hIP191-14	MePCE	[314]		Q96GA3	3	3	9.7	1.34	0.00079	54855.4	HOMO SAPIENS	LTV1_HUMAN Protein LTV1 homolog
8829	hIP191-14	hIP191-14	MePCE	[315]		Q96QR8	1	1	4.2	2.81	5.3e-06	33241.1	HOMO SAPIENS	PURB_HUMAN Transcriptional activator protein Pur-beta
8830	hIP191-14	hIP191-14	MePCE	[316]		Q9NP92	1	1	4.6	2.78	1.3e-05	50365.2	HOMO SAPIENS	RT30_HUMAN 28S ribosomal protein S30, mitochondrial
8831	hIP191-14	hIP191-14	MePCE	[317]		P50914	1	1	5.1	2.77	9.1e-05	23432.1	HOMO SAPIENS	RL14_HUMAN 60S ribosomal protein L14
8832	hIP191-14	hIP191-14	MePCE	[318]		Q9Y3D5	2	2	19	1.89	3.3e-05	15849.9	HOMO SAPIENS	RT18C_HUMAN 28S ribosomal protein S18c, mitochondrial
8833	hIP191-14	hIP191-14	MePCE	[319]		Q14498	3	3	7.9	1.36	0.00019	59380.1	HOMO SAPIENS	RBM39_HUMAN RNA-binding protein 39
8834	hIP191-14	hIP191-14	MePCE	[320]		Q9BYD2	1	1	6.4	2.73	2e-05	30243.5	HOMO SAPIENS	RM09_HUMAN 39S ribosomal protein L9, mitochondrial
8835	hIP191-14	hIP191-14	MePCE	[321]		Q16629	3	3	12.6	1.22	0.00046	27366.8	HOMO SAPIENS	SRSF7_HUMAN Serine/arginine-rich splicing factor 7
8836	hIP191-14	hIP191-14	MePCE	[322]		Q14244	2	2	2.8	1.5	0.00071	84052.4	HOMO SAPIENS	MAP7_HUMAN Ensconsin
8837	hIP191-14	hIP191-14	MePCE	[323]		Q9UHB9	3	3	10.2	1.08	0.0087	70730.2	HOMO SAPIENS	SRP68_HUMAN Signal recognition particle 68 kDa protein
8838	hIP191-14	hIP191-14	MePCE	[324]		Q9UN86	1	1	3.3	2.67	3.6e-06	54121.6	HOMO SAPIENS	G3BP2_HUMAN Ras GTPase-activating protein-binding protein 2
8839	hIP191-14	hIP191-14	MePCE	[325]		O75817	1	1	10.7	2.66	1.1e-05	15651	HOMO SAPIENS	POP7_HUMAN Ribonuclease P protein subunit p20
8840	hIP191-14	hIP191-14	MePCE	[326]		O00411	4	4	3.7	1.06	0.00091	138622	HOMO SAPIENS	RPOM_HUMAN DNA-directed RNA polymerase, mitochondrial
8841	hIP191-14	hIP191-14	MePCE	[327]		Q9Y3C1	1	1	8.4	2.63	6.1e-06	21188.5	HOMO SAPIENS	NOP16_HUMAN Nucleolar protein 16
8842	hIP191-14	hIP191-14	MePCE	[328]		Q06830	2	2	10.1	1.38	0.00033	22110.5	HOMO SAPIENS	PRDX1_HUMAN Peroxiredoxin-1
8843	hIP191-14	hIP191-14	MePCE	[329]		P60900	2	2	9.8	1.67	0.00013	27399.7	HOMO SAPIENS	PSA6_HUMAN Proteasome subunit alpha type-6
8844	hIP191-14	hIP191-14	MePCE	[330]		O75607	1	1	9.6	2.52	4.8e-05	19343.9	HOMO SAPIENS	NPM3_HUMAN Nucleoplasmin-3
8845	hIP191-14	hIP191-14	MePCE	[331]		P14618	2	2	4.5	1.6	0.00033	57937.4	HOMO SAPIENS	KPYM_HUMAN Pyruvate kinase isozymes M1/M2
8846	hIP191-14	hIP191-14	MePCE	[332]		Q12849	2	2	4.4	1.36	0.00029	53126.8	HOMO SAPIENS	GRSF1_HUMAN G-rich sequence factor 1
8847	hIP191-14	hIP191-14	MePCE	[333]		Q96CT7	1	1	5.8	2.31	4.9e-05	25835.4	HOMO SAPIENS	CC124_HUMAN Coiled-coil domain-containing protein 124
8848	hIP191-14	hIP191-14	MePCE	[334]		Q7L2H7	1	1	3.2	2.3	1.2e-05	42503.3	HOMO SAPIENS	EIF3M_HUMAN Eukaryotic translation initiation factor 3 subunit M
8849	hIP191-14	hIP191-14	MePCE	[335]		Q96KR1	1	1	1.1	2.27	6.8e-05	117013	HOMO SAPIENS	ZFR_HUMAN Zinc finger RNA-binding protein
8850	hIP191-14	hIP191-14	MePCE	[336]		O95983	2	2	10	1.16	0.0016	32844.4	HOMO SAPIENS	MBD3_HUMAN Methyl-CpG-binding domain protein 3
8851	hIP191-14	hIP191-14	MePCE	[337]		Q15233	3	3	13.4	0.83	0.0082	54232	HOMO SAPIENS	NONO_HUMAN Non-POU domain-containing octamer-binding protein
8852	hIP191-14	hIP191-14	MePCE	[338]		P41250	1	1	1.8	2.18	1.2e-05	83166.3	HOMO SAPIENS	SYG_HUMAN Glycine--tRNA ligase
8853	hIP191-14	hIP191-14	MePCE	[339]		P38159	1	1	3.3	2.14	3e-05	42332.2	HOMO SAPIENS	RBMX_HUMAN RNA-binding motif protein, X chromosome
8854	hIP191-14	hIP191-14	MePCE	[339-1]	0	Q96E39	1	1	3.3	2.14	3e-05	42141.9	HOMO SAPIENS	RMXL1_HUMAN RNA binding motif protein, X-linked-like-1
8855	hIP191-14	hIP191-14	MePCE	[340]		P26196	1	1	5	2.1	0.00011	54417.3	HOMO SAPIENS	DDX6_HUMAN Probable ATP-dependent RNA helicase DDX6
8856	hIP191-14	hIP191-14	MePCE	[341]		P82664	1	1	9	2.05	0.00013	22999.7	HOMO SAPIENS	RT10_HUMAN 28S ribosomal protein S10, mitochondrial
8857	hIP191-14	hIP191-14	MePCE	[342]		Q12899	2	2	4.5	1.24	0.0013	62166.4	HOMO SAPIENS	TRI26_HUMAN Tripartite motif-containing protein 26
8858	hIP191-14	hIP191-14	MePCE	[343]		O14602	2	2	17.4	1.27	0.00056	16442.5	HOMO SAPIENS	IF1AY_HUMAN Eukaryotic translation initiation factor 1A, Y-chromosomal
8859	hIP191-14	hIP191-14	MePCE	[343-1]	0	P47813	2	2	17.4	1.27	0.00056	16460.5	HOMO SAPIENS	IF1AX_HUMAN Eukaryotic translation initiation factor 1A, X-chromosomal
8860	hIP191-14	hIP191-14	MePCE	[344]		Q9H0D6	2	2	2.8	1.05	0.0011	108583	HOMO SAPIENS	XRN2_HUMAN 5'-3' exoribonuclease 2
8861	hIP191-14	hIP191-14	MePCE	[345]		Q9Y3Y2	1	1	5.2	2.02	0.00027	26396.8	HOMO SAPIENS	CHTOP_HUMAN Chromatin target of PRMT1 protein
8862	hIP191-14	hIP191-14	MePCE	[346]		Q13601	1	1	3.7	1.88	0.00013	43665.3	HOMO SAPIENS	KRR1_HUMAN KRR1 small subunit processome component homolog
8863	hIP191-14	hIP191-14	MePCE	[347]		Q9Y224	1	1	8.2	1.87	0.00092	28068.3	HOMO SAPIENS	CN166_HUMAN UPF0568 protein C14orf166
8864	hIP191-14	hIP191-14	MePCE	[348]		O15371	2	2	8	1.19	0.0018	63973.3	HOMO SAPIENS	EIF3D_HUMAN Eukaryotic translation initiation factor 3 subunit D
8865	hIP191-14	hIP191-14	MePCE	[349]		O75643	3	3	1.7	0.84	0.00069	244510	HOMO SAPIENS	U520_HUMAN U5 small nuclear ribonucleoprotein 200 kDa helicase
8866	hIP191-14	hIP191-14	MePCE	[350]		O43175	1	1	2.3	1.8	5.5e-05	56651	HOMO SAPIENS	SERA_HUMAN D-3-phosphoglycerate dehydrogenase
8867	hIP191-14	hIP191-14	MePCE	[351]		P27708	2	2	1.9	1.13	0.00074	242986	HOMO SAPIENS	PYR1_HUMAN CAD protein
8868	hIP191-14	hIP191-14	MePCE	[352]		P18077	3	3	26.4	0.83	0.0012	12537.8	HOMO SAPIENS	RL35A_HUMAN 60S ribosomal protein L35a
8869	hIP191-14	hIP191-14	MePCE	[353]		P28074	1	1	4.9	1.76	9e-05	28480.5	HOMO SAPIENS	PSB5_HUMAN Proteasome subunit beta type-5
8870	hIP191-14	hIP191-14	MePCE	[354]		Q16540	1	1	14.4	1.73	0.00076	17781.3	HOMO SAPIENS	RM23_HUMAN 39S ribosomal protein L23, mitochondrial
8871	hIP191-14	hIP191-14	MePCE	[355]		Q9NWU5	2	2	12.1	1.19	0.00045	23640.9	HOMO SAPIENS	RM22_HUMAN 39S ribosomal protein L22, mitochondrial
8872	hIP191-14	hIP191-14	MePCE	[356]		O75937	1	1	11.5	1.69	0.00038	29841.9	HOMO SAPIENS	DNJC8_HUMAN DnaJ homolog subfamily C member 8
8873	hIP191-14	hIP191-14	MePCE	[357]		Q12874	1	1	2.4	1.68	0.00014	58849.4	HOMO SAPIENS	SF3A3_HUMAN Splicing factor 3A subunit 3
8874	hIP191-14	hIP191-14	MePCE	[358]		Q9UJV9	1	1	2.1	1.68	7.4e-05	69838.3	HOMO SAPIENS	DDX41_HUMAN Probable ATP-dependent RNA helicase DDX41
8875	hIP191-14	hIP191-14	MePCE	[359]		Q9BRJ2	1	1	9.2	1.68	0.00022	35351.2	HOMO SAPIENS	RM45_HUMAN 39S ribosomal protein L45, mitochondrial
8876	hIP191-14	hIP191-14	MePCE	[360]		P60228	2	2	6.5	0.85	0.0061	52221.3	HOMO SAPIENS	EIF3E_HUMAN Eukaryotic translation initiation factor 3 subunit E
8877	hIP191-14	hIP191-14	MePCE	[361]		P62304	1	2	12	1.63	0.0011	10803.7	HOMO SAPIENS	RUXE_HUMAN Small nuclear ribonucleoprotein E
8878	hIP191-14	hIP191-14	MePCE	[362]		Q14444	1	1	1.6	1.63	9.5e-05	78366.9	HOMO SAPIENS	CAPR1_HUMAN Caprin-1
8879	hIP191-14	hIP191-14	MePCE	[363]		Q9Y230	1	1	2.6	1.62	0.00017	51157	HOMO SAPIENS	RUVB2_HUMAN RuvB-like 2
8880	hIP191-14	hIP191-14	MePCE	[364]		P04844	1	1	2.9	1.6	4e-05	69284.6	HOMO SAPIENS	RPN2_HUMAN Dolichyl-diphosphooligosaccharide--protein glycosyltransferase subunit 2
8881	hIP191-14	hIP191-14	MePCE	[365]		Q96HS1	1	1	4.2	1.59	0.00025	32004.7	HOMO SAPIENS	PGAM5_HUMAN Serine/threonine-protein phosphatase PGAM5, mitochondrial
8882	hIP191-14	hIP191-14	MePCE	[366]		Q8NFW8	1	1	5.8	1.57	0.0005	48379.7	HOMO SAPIENS	NEUA_HUMAN N-acylneuraminate cytidylyltransferase
8883	hIP191-14	hIP191-14	MePCE	[367]		Q92598	1	1	1.7	1.57	0.00016	96865.8	HOMO SAPIENS	HS105_HUMAN Heat shock protein 105 kDa
8884	hIP191-14	hIP191-14	MePCE	[368]		Q9BYC8	1	1	5.3	1.55	5e-05	21405	HOMO SAPIENS	RM32_HUMAN 39S ribosomal protein L32, mitochondrial
8885	hIP191-14	hIP191-14	MePCE	[369]		Q12904	1	1	5.8	1.52	0.0011	34353	HOMO SAPIENS	AIMP1_HUMAN Aminoacyl tRNA synthase complex-interacting multifunctional protein 1
8886	hIP191-14	hIP191-14	MePCE	[370]		A2A3N6	1	1	2	1.49	0.00018	95048.4	HOMO SAPIENS	PIPSL_HUMAN Putative PIP5K1A and PSMD4-like protein
8887	hIP191-14	hIP191-14	MePCE	[370-1]	0	P55036	1	1	4.5	1.49	0.00018	40737	HOMO SAPIENS	PSMD4_HUMAN 26S proteasome non-ATPase regulatory subunit 4
8888	hIP191-14	hIP191-14	MePCE	[371]		Q96EL2	2	2	12	1.27	4.9e-05	19015.3	HOMO SAPIENS	RT24_HUMAN 28S ribosomal protein S24, mitochondrial
8889	hIP191-14	hIP191-14	MePCE	[372]		P38117	2	2	8.2	0.74	0.0017	27843.9	HOMO SAPIENS	ETFB_HUMAN Electron transfer flavoprotein subunit beta
8890	hIP191-14	hIP191-14	MePCE	[373]		Q9UHX1	1	1	5.5	1.47	0.00025	59876	HOMO SAPIENS	PUF60_HUMAN Poly(U)-binding-splicing factor PUF60
8891	hIP191-14	hIP191-14	MePCE	[374]		Q86YZ3	1	1	0.6	1.42	0.0003	282392	HOMO SAPIENS	HORN_HUMAN Hornerin
8892	hIP191-14	hIP191-14	MePCE	[375]		Q92769	1	1	3.9	1.41	0.00079	55364.7	HOMO SAPIENS	HDAC2_HUMAN Histone deacetylase 2
8893	hIP191-14	hIP191-14	MePCE	[376]		Q14232	1	1	5.6	1.41	0.007	33712.5	HOMO SAPIENS	EI2BA_HUMAN Translation initiation factor eIF-2B subunit alpha
8894	hIP191-14	hIP191-14	MePCE	[377]		Q9NVI7	2	2	5.4	0.76	0.0048	71369.8	HOMO SAPIENS	ATD3A_HUMAN ATPase family AAA domain-containing protein 3A
8895	hIP191-14	hIP191-14	MePCE	[377-1]	0	Q5T2N8	1	1	5.4	0.64	0.0097	46379.9	HOMO SAPIENS	ATD3C_HUMAN ATPase family AAA domain-containing protein 3C
8896	hIP191-14	hIP191-14	MePCE	[377-2]	0	Q5T9A4	1	1	3.4	0.64	0.0097	72573.6	HOMO SAPIENS	ATD3B_HUMAN ATPase family AAA domain-containing protein 3B
8897	hIP191-14	hIP191-14	MePCE	[378]		Q15003	2	2	3.5	1.03	0.0008	82563.9	HOMO SAPIENS	CND2_HUMAN Condensin complex subunit 2
8898	hIP191-14	hIP191-14	MePCE	[379]		Q96GC5	1	1	4.7	1.38	0.00024	23935	HOMO SAPIENS	RM48_HUMAN 39S ribosomal protein L48, mitochondrial
8899	hIP191-14	hIP191-14	MePCE	[380]		Q969G3	1	1	3.2	1.38	0.00021	46649.8	HOMO SAPIENS	SMCE1_HUMAN SWI/SNF-related matrix-associated actin-dependent regulator of chromatin subfamily E member 1
8900	hIP191-14	hIP191-14	MePCE	[381]		Q8NC60	1	1	2	1.38	0.00025	78458.5	HOMO SAPIENS	NOA1_HUMAN Nitric oxide-associated protein 1
8901	hIP191-14	hIP191-14	MePCE	[382]		Q9BZE4	2	2	3.2	0.91	0.002	73965.2	HOMO SAPIENS	NOG1_HUMAN Nucleolar GTP-binding protein 1
8902	hIP191-14	hIP191-14	MePCE	[383]		Q92542	1	1	5.6	1.36	0.0036	78411.6	HOMO SAPIENS	NICA_HUMAN Nicastrin
8903	hIP191-14	hIP191-14	MePCE	[384]		Q15008	1	1	3.3	1.36	0.0002	45531.7	HOMO SAPIENS	PSMD6_HUMAN 26S proteasome non-ATPase regulatory subunit 6
8904	hIP191-14	hIP191-14	MePCE	[385]		P40939	2	2	5.2	0.82	0.0044	83000.4	HOMO SAPIENS	ECHA_HUMAN Trifunctional enzyme subunit alpha, mitochondrial
8905	hIP191-14	hIP191-14	MePCE	[386]		P30405	1	1	14	1.32	0.00049	22040.4	HOMO SAPIENS	PPIF_HUMAN Peptidyl-prolyl cis-trans isomerase F, mitochondrial
8906	hIP191-14	hIP191-14	MePCE	[387]		Q8IWS0	2	2	8.2	0.86	0.0027	41290.9	HOMO SAPIENS	PHF6_HUMAN PHD finger protein 6
8907	hIP191-14	hIP191-14	MePCE	[388]		Q96EL3	2	2	20.5	0.67	0.0014	12106.9	HOMO SAPIENS	RM53_HUMAN 39S ribosomal protein L53, mitochondrial
8908	hIP191-14	hIP191-14	MePCE	[389]		P27824	1	1	2.7	1.3	0.00013	67568.9	HOMO SAPIENS	CALX_HUMAN Calnexin
8909	hIP191-14	hIP191-14	MePCE	[390]		Q9UQE7	1	1	1	1.3	0.00014	141543	HOMO SAPIENS	SMC3_HUMAN Structural maintenance of chromosomes protein 3
8910	hIP191-14	hIP191-14	MePCE	[391]		P42704	1	1	0.8	1.3	0.0018	157906	HOMO SAPIENS	LPPRC_HUMAN Leucine-rich PPR motif-containing protein, mitochondrial
8911	hIP191-14	hIP191-14	MePCE	[392]		P82932	1	1	6.4	1.28	0.0018	14226.7	HOMO SAPIENS	RT06_HUMAN 28S ribosomal protein S6, mitochondrial
8912	hIP191-14	hIP191-14	MePCE	[393]		P56134	1	1	11.7	1.28	0.00066	10918	HOMO SAPIENS	ATPK_HUMAN ATP synthase subunit f, mitochondrial
8913	hIP191-14	hIP191-14	MePCE	[394]		P61313	1	1	4.4	1.27	0.00074	24146.3	HOMO SAPIENS	RL15_HUMAN 60S ribosomal protein L15
8914	hIP191-14	hIP191-14	MePCE	[395]		Q99714	1	1	4.6	1.25	0.00069	26923.3	HOMO SAPIENS	HCD2_HUMAN 3-hydroxyacyl-CoA dehydrogenase type-2
8915	hIP191-14	hIP191-14	MePCE	[396]		Q14331	2	2	9.7	0.73	0.0032	29172.6	HOMO SAPIENS	FRG1_HUMAN Protein FRG1
8916	hIP191-14	hIP191-14	MePCE	[396-1]	0	Q9BZ01	1	1	6.6	0.73	0.0032	20761.9	HOMO SAPIENS	FRG1B_HUMAN Protein FRG1B
8917	hIP191-14	hIP191-14	MePCE	[397]		Q9P0M2	1	1	5.7	1.24	0.00069	39518.3	HOMO SAPIENS	AKA7G_HUMAN A-kinase anchor protein 7 isoform gamma
8918	hIP191-14	hIP191-14	MePCE	[398]		O00488	1	1	10.4	1.23	0.00066	15199.3	HOMO SAPIENS	ZN593_HUMAN Zinc finger protein 593
8919	hIP191-14	hIP191-14	MePCE	[399]		P56182	1	1	2.8	1.18	0.00071	52839.7	HOMO SAPIENS	RRP1_HUMAN Ribosomal RNA processing protein 1 homolog A
8920	hIP191-14	hIP191-14	MePCE	[400]		Q9H7E9	1	1	10.5	1.17	0.0044	24992.7	HOMO SAPIENS	CH033_HUMAN UPF0488 protein C8orf33
8921	hIP191-14	hIP191-14	MePCE	[401]		O94952	1	1	3.7	1.16	0.0018	72270.7	HOMO SAPIENS	FBX21_HUMAN F-box only protein 21
8922	hIP191-14	hIP191-14	MePCE	[402]		O00303	1	1	3.1	1.15	0.00084	37564.2	HOMO SAPIENS	EIF3F_HUMAN Eukaryotic translation initiation factor 3 subunit F
8923	hIP191-14	hIP191-14	MePCE	[403]		decoy	1	2	1.8	1.11	0.001	93611.4	HOMO SAPIENS	DISC1_HUMAN Disrupted in schizophrenia 1 protein
8924	hIP191-14	hIP191-14	MePCE	[404]		P62861	1	2	16.9	1.01	0.0013	6647.9	HOMO SAPIENS	RS30_HUMAN 40S ribosomal protein S30
8925	hIP191-14	hIP191-14	MePCE	[405]		Q9Y291	1	1	8.5	1.01	0.0053	12628.8	HOMO SAPIENS	RT33_HUMAN 28S ribosomal protein S33, mitochondrial
8926	hIP191-14	hIP191-14	MePCE	[406]		Q07955	3	3	18.1	0.44	0.0043	27744.8	HOMO SAPIENS	SRSF1_HUMAN Serine/arginine-rich splicing factor 1
8927	hIP191-14	hIP191-14	MePCE	[407]		Q9UJS0	1	1	3.3	0.96	0.00033	74176.2	HOMO SAPIENS	CMC2_HUMAN Calcium-binding mitochondrial carrier protein Aralar2
8928	hIP191-14	hIP191-14	MePCE	[408]		Q7Z7F7	1	1	12.5	0.95	0.00088	15128.5	HOMO SAPIENS	RM55_HUMAN 39S ribosomal protein L55, mitochondrial
8929	hIP191-14	hIP191-14	MePCE	[409]		Q9BWJ5	1	1	17.4	0.91	0.0024	10135.5	HOMO SAPIENS	SF3B5_HUMAN Splicing factor 3B subunit 5
8930	hIP191-14	hIP191-14	MePCE	[410]		P62891	1	1	19.6	0.91	0.0017	6406.7	HOMO SAPIENS	RL39_HUMAN 60S ribosomal protein L39
8931	hIP191-14	hIP191-14	MePCE	[410-1]	0	Q59GN2	1	1	19.6	0.91	0.0017	6322.7	HOMO SAPIENS	R39L5_HUMAN Putative 60S ribosomal protein L39-like 5
8932	hIP191-14	hIP191-14	MePCE	[411]		O14950	3	3	18.6	0.43	0.0074	19779.3	HOMO SAPIENS	ML12B_HUMAN Myosin regulatory light chain 12B
8933	hIP191-14	hIP191-14	MePCE	[411-1]	0	P19105	3	3	18.7	0.43	0.0074	19794.3	HOMO SAPIENS	ML12A_HUMAN Myosin regulatory light chain 12A
8934	hIP191-14	hIP191-14	MePCE	[412]		P55081	1	1	5.7	0.86	0.0054	51958.9	HOMO SAPIENS	MFAP1_HUMAN Microfibrillar-associated protein 1
8935	hIP191-14	hIP191-14	MePCE	[413]		Q2NL82	1	1	1.4	0.83	0.0016	91810.8	HOMO SAPIENS	TSR1_HUMAN Pre-rRNA-processing protein TSR1 homolog
8936	hIP191-14	hIP191-14	MePCE	[414]		Q8TAQ2	1	1	1	0.82	0.0017	132880	HOMO SAPIENS	SMRC2_HUMAN SWI/SNF complex subunit SMARCC2
8937	hIP191-14	hIP191-14	MePCE	[414-1]	0	Q92922	1	1	1.1	0.82	0.0017	122868	HOMO SAPIENS	SMRC1_HUMAN SWI/SNF complex subunit SMARCC1
8938	hIP191-14	hIP191-14	MePCE	[415]		P47756	1	1	7.2	0.82	0.0024	31350.8	HOMO SAPIENS	CAPZB_HUMAN F-actin-capping protein subunit beta
8939	hIP191-14	hIP191-14	MePCE	[416]		P11310	1	1	4.3	0.8	0.00076	46588.8	HOMO SAPIENS	ACADM_HUMAN Medium-chain specific acyl-CoA dehydrogenase, mitochondrial
8940	hIP191-14	hIP191-14	MePCE	[417]		P10599	1	1	8.6	0.79	0.0017	11737.6	HOMO SAPIENS	THIO_HUMAN Thioredoxin
8941	hIP191-14	hIP191-14	MePCE	[418]		Q9H2U2	1	1	3.9	0.78	0.0015	37920.6	HOMO SAPIENS	IPYR2_HUMAN Inorganic pyrophosphatase 2, mitochondrial
8942	hIP191-14	hIP191-14	MePCE	[419]		P31946	1	1	4.5	0.76	0.00088	28082.6	HOMO SAPIENS	1433B_HUMAN 14-3-3 protein beta/alpha
8943	hIP191-14	hIP191-14	MePCE	[420]		P10301	1	2	5	0.76	0.0025	23480.7	HOMO SAPIENS	RRAS_HUMAN Ras-related protein R-Ras
8944	hIP191-14	hIP191-14	MePCE	[421]		Q13257	1	1	3.9	0.75	0.0037	23510.1	HOMO SAPIENS	MD2L1_HUMAN Mitotic spindle assembly checkpoint protein MAD2A
8945	hIP191-14	hIP191-14	MePCE	[422]		P84103	2	2	18.3	0.54	0.0048	19329.8	HOMO SAPIENS	SRSF3_HUMAN Serine/arginine-rich splicing factor 3
8946	hIP191-14	hIP191-14	MePCE	[423]		P51665	1	1	3.4	0.69	0.0014	37025.7	HOMO SAPIENS	PSD7_HUMAN 26S proteasome non-ATPase regulatory subunit 7
8947	hIP191-14	hIP191-14	MePCE	[424]		P57723	1	1	3.5	0.68	0.0063	41482.1	HOMO SAPIENS	PCBP4_HUMAN Poly(rC)-binding protein 4
8948	hIP191-14	hIP191-14	MePCE	[425]		P62306	1	1	9.3	0.68	0.0052	9725.3	HOMO SAPIENS	RUXF_HUMAN Small nuclear ribonucleoprotein F
8949	hIP191-14	hIP191-14	MePCE	[426]		P11387	1	1	1.3	0.67	0.0038	90726.5	HOMO SAPIENS	TOP1_HUMAN DNA topoisomerase 1
8950	hIP191-14	hIP191-14	MePCE	[427]		Q16891	1	1	2.5	0.66	0.0023	83678.6	HOMO SAPIENS	IMMT_HUMAN Mitochondrial inner membrane protein
8951	hIP191-14	hIP191-14	MePCE	[428]		P25787	1	1	6	0.65	0.0024	25898.8	HOMO SAPIENS	PSA2_HUMAN Proteasome subunit alpha type-2
8952	hIP191-14	hIP191-14	MePCE	[429]		decoy	1	1	1.1	0.65	0.0036	97215.2	HOMO SAPIENS	AGO1_HUMAN Protein argonaute-1
8953	hIP191-14	hIP191-14	MePCE	[430]		P30153	1	1	1.9	0.64	0.0062	65309.2	HOMO SAPIENS	2AAA_HUMAN Serine/threonine-protein phosphatase 2A 65 kDa regulatory subunit A alpha isoform
8954	hIP191-14	hIP191-14	MePCE	[431]		P63208	2	2	13.5	0.39	0.0043	18658.2	HOMO SAPIENS	SKP1_HUMAN S-phase kinase-associated protein 1
8955	hIP191-14	hIP191-14	MePCE	[432]		P49411	1	1	2.4	0.63	0.00086	49542	HOMO SAPIENS	EFTU_HUMAN Elongation factor Tu, mitochondrial
8956	hIP191-14	hIP191-14	MePCE	[433]		P11717	1	1	0.9	0.63	0.0044	274377	HOMO SAPIENS	MPRI_HUMAN Cation-independent mannose-6-phosphate receptor
8957	hIP191-14	hIP191-14	MePCE	[434]		Q04917	1	1	4.9	0.62	0.0013	28219	HOMO SAPIENS	1433F_HUMAN 14-3-3 protein eta
8958	hIP191-14	hIP191-14	MePCE	[435]		P58557	2	2	12	0.4	0.0094	19298.3	HOMO SAPIENS	YBEY_HUMAN rRNA maturation factor homolog
8959	hIP191-14	hIP191-14	MePCE	[436]		Q8TAE8	1	1	9	0.61	0.0033	25384	HOMO SAPIENS	G45IP_HUMAN Growth arrest and DNA damage-inducible proteins-interacting protein 1
8960	hIP191-14	hIP191-14	MePCE	[437]		P62987	1	1	7.8	0.61	0.0027	14728.5	HOMO SAPIENS	RL40_HUMAN Ubiquitin-60S ribosomal protein L40
8961	hIP191-14	hIP191-14	MePCE	[438]		P53618	1	1	1.7	0.61	0.0014	107143	HOMO SAPIENS	COPB_HUMAN Coatomer subunit beta
8962	hIP191-14	hIP191-14	MePCE	[439]		P06733	2	2	5.3	0.54	0.0016	47169.4	HOMO SAPIENS	ENOA_HUMAN Alpha-enolase
8963	hIP191-14	hIP191-14	MePCE	[440]		Q8WXX5	2	2	11.9	0.35	0.0045	29910	HOMO SAPIENS	DNJC9_HUMAN DnaJ homolog subfamily C member 9
8964	hIP191-14	hIP191-14	MePCE	[441]		P09496	1	1	3.6	0.56	0.0064	27076.9	HOMO SAPIENS	CLCA_HUMAN Clathrin light chain A
8965	hIP191-14	hIP191-14	MePCE	[442]		Q9BXS6	1	1	2.9	0.56	0.0011	49452.2	HOMO SAPIENS	NUSAP_HUMAN Nucleolar and spindle-associated protein 1
8966	hIP191-14	hIP191-14	MePCE	[443]		Q5T653	1	1	4.6	0.54	0.0058	33301.1	HOMO SAPIENS	RM02_HUMAN 39S ribosomal protein L2, mitochondrial
8967	hIP191-14	hIP191-14	MePCE	[444]		P28066	1	1	5.4	0.53	0.0033	26411.3	HOMO SAPIENS	PSA5_HUMAN Proteasome subunit alpha type-5
8968	hIP191-14	hIP191-14	MePCE	[445]		Q8N163	1	1	1	0.52	0.006	102902	HOMO SAPIENS	K1967_HUMAN Protein KIAA1967
8969	hIP191-14	hIP191-14	MePCE	[446]		O76021	1	1	3.1	0.52	0.0018	54973	HOMO SAPIENS	RL1D1_HUMAN Ribosomal L1 domain-containing protein 1
8970	hIP191-14	hIP191-14	MePCE	[447]		decoy	1	1	2.1	0.5	0.0065	121873	HOMO SAPIENS	REST_HUMAN RE1-silencing transcription factor
8971	hIP191-14	hIP191-14	MePCE	[448]		P04843	1	1	2.5	0.49	0.0033	68570	HOMO SAPIENS	RPN1_HUMAN Dolichyl-diphosphooligosaccharide--protein glycosyltransferase subunit 1
8972	hIP191-14	hIP191-14	MePCE	[449]		decoy	1	1	2.9	0.48	0.0021	60573.4	HOMO SAPIENS	ZN468_HUMAN Zinc finger protein 468
8973	hIP191-14	hIP191-14	MePCE	[450]		Q8IX12	1	1	1.2	0.48	0.0032	132822	HOMO SAPIENS	CCAR1_HUMAN Cell division cycle and apoptosis regulator protein 1
8974	hIP191-14	hIP191-14	MePCE	[451]		P54886	1	1	1.5	0.47	0.0018	87303.1	HOMO SAPIENS	P5CS_HUMAN Delta-1-pyrroline-5-carboxylate synthase
8975	hIP191-14	hIP191-14	MePCE	[452]		Q9UHV9	1	1	9.1	0.44	0.0021	16648	HOMO SAPIENS	PFD2_HUMAN Prefoldin subunit 2
8976	hIP191-14	hIP191-14	MePCE	[453]		P56373	1	1	2	0.43	0.00042	44289.4	HOMO SAPIENS	P2RX3_HUMAN P2X purinoceptor 3
8977	hIP191-14	hIP191-14	MePCE	[454]		O43347	1	1	2.8	0.43	0.0025	39124.9	HOMO SAPIENS	MSI1H_HUMAN RNA-binding protein Musashi homolog 1
8978	hIP191-14	hIP191-14	MePCE	[455]		O75390	1	1	3.4	0.43	0.0096	51712.9	HOMO SAPIENS	CISY_HUMAN Citrate synthase, mitochondrial
8979	hIP191-14	hIP191-14	MePCE	[456]		P31153	1	1	3.8	0.38	0.0067	43661	HOMO SAPIENS	METK2_HUMAN S-adenosylmethionine synthase isoform type-2
8980	hIP191-14	hIP191-14	MePCE	[457]		P62937	1	1	16.4	0.38	0.0064	18012.7	HOMO SAPIENS	PPIA_HUMAN Peptidyl-prolyl cis-trans isomerase A
8981	hIP191-14	hIP191-14	MePCE	[458]		Q8N7U6	1	2	1.8	0.37	0.0044	93802.8	HOMO SAPIENS	EFHB_HUMAN EF-hand domain-containing family member B
8982	hIP191-14	hIP191-14	MePCE	[459]		P14174	1	1	10.4	0.35	0.0083	12476.4	HOMO SAPIENS	MIF_HUMAN Macrophage migration inhibitory factor
8983	hIP191-14	hIP191-14	MePCE	[460]		decoy	1	1	1.1	0.34	0.0035	136312	HOMO SAPIENS	XPO5_HUMAN Exportin-5
8984	hIP191-14	hIP191-14	MePCE	[461]		O43324	1	1	5.7	0.34	0.0036	19810.7	HOMO SAPIENS	MCA3_HUMAN Eukaryotic translation elongation factor 1 epsilon-1
8985	hIP191-14	hIP191-14	MePCE	[462]		Q15027	1	1	2.4	0.32	0.0054	81536.6	HOMO SAPIENS	ACAP1_HUMAN Arf-GAP with coiled-coil, ANK repeat and PH domain-containing protein 1
8986	hIP191-14	hIP191-14	MePCE	[463]		Q9Y2C4	1	1	4.6	0.3	0.0066	41085.1	HOMO SAPIENS	EXOG_HUMAN Nuclease EXOG, mitochondrial
8987	hIP191-14	hIP191-14	MePCE	[464]		Q9BTE1	1	1	6	0.3	0.0047	20126.7	HOMO SAPIENS	DCTN5_HUMAN Dynactin subunit 5
8988	hIP191-14	hIP191-14	MePCE	[465]		Q7Z2T5	1	1	1.5	0.28	0.0031	81748.1	HOMO SAPIENS	TRM1L_HUMAN TRMT1-like protein
8989	hIP191-14	hIP191-14	MePCE	[466]		P35606	2	2	2.8	0.15	0.0086	102488	HOMO SAPIENS	COPB2_HUMAN Coatomer subunit beta'
8990	hIP191-14	hIP191-14	MePCE	[467]		Q96AV8	1	1	3.6	0.25	0.0094	99888.9	HOMO SAPIENS	E2F7_HUMAN Transcription factor E2F7
8991	hIP191-14	hIP191-14	MePCE	[468]		decoy	1	1	2	0.23	0.0046	93615	HOMO SAPIENS	LPIN3_HUMAN Phosphatidate phosphatase LPIN3
8992	hIP191-14	hIP191-14	MePCE	[469]		P35659	1	1	3.2	0.21	0.004	42674.6	HOMO SAPIENS	DEK_HUMAN Protein DEK
8993	hIP191-14	hIP191-14	MePCE	[470]		P51571	1	1	6.4	0.2	0.0037	18998.8	HOMO SAPIENS	SSRD_HUMAN Translocon-associated protein subunit delta
8994	hIP191-14	hIP191-14	MePCE	[471]		P49406	1	1	3.8	0.19	0.006	33535.3	HOMO SAPIENS	RM19_HUMAN 39S ribosomal protein L19, mitochondrial
8995	hIP191-14	hIP191-14	MePCE	[472]		Q49A26	1	1	2.5	0.17	0.0026	60557	HOMO SAPIENS	GLYR1_HUMAN Putative oxidoreductase GLYR1
8996	hIP191-14	hIP191-14	MePCE	[473]		Q15084	1	1	3.2	0.16	0.0094	48121.7	HOMO SAPIENS	PDIA6_HUMAN Protein disulfide-isomerase A6
8997	hIP191-14	hIP191-14	MePCE	[474]		P54105	1	1	8	0.14	0.008	26215.5	HOMO SAPIENS	ICLN_HUMAN Methylosome subunit pICln
8998	hIP191-14	hIP191-14	MePCE	[475]		P42285	1	1	1.3	0.04	0.0078	117806	HOMO SAPIENS	SK2L2_HUMAN Superkiller viralicidic activity 2-like 2
8999	hIP191-14	hIP191-14	MePCE	[476]		Q86YP4	1	1	1.9	0.03	0.006	68063.3	HOMO SAPIENS	P66A_HUMAN Transcriptional repressor p66-alpha
9000	hIP191-14	hIP191-14	MePCE	[477]		decoy	1	1	1.8	0.02	0.0083	68250.5	HOMO SAPIENS	LRC40_HUMAN Leucine-rich repeat-containing protein 40
9001	hIP191-14	hIP191-14	MePCE	[478]		P62258	1	1	4.7	0.02	0.0059	29174.2	HOMO SAPIENS	1433E_HUMAN 14-3-3 protein epsilon
9002	hIP191-14	hIP191-14	MePCE	[479]		decoy	1	1	3.4	0.01	0.0072	28974.1	HOMO SAPIENS	TAF9_HUMAN Transcription initiation factor TFIID subunit 9
9003	hIP191-14	hIP191-14	MePCE	[480]		Q58FG0	1	1	3	0	0.0077	38738.3	HOMO SAPIENS	HS905_HUMAN Putative heat shock protein HSP 90-alpha A5

## Sheet: LARP7 #1
	ID			Rank	Uniq Pep	Acc #	Num Unique	Peptide Count	% Cov	Best Disc Score	Best Expect Val	Protein MW	Species	Protein Name
5707	hIP190-13	hIP190-013	LARP7	[1]		Q15020	49	105	51	6.64	1.8e-10	109936	HOMO SAPIENS	SART3_HUMAN Squamous cell carcinoma antigen recognized by T-cells 3
5708	hIP190-13	hIP190-013	LARP7	[2]		O76094	31	48	58.1	6.31	1.2e-10	74606.8	HOMO SAPIENS	SRP72_HUMAN Signal recognition particle 72 kDa protein
5709	hIP190-13	hIP190-013	LARP7	[3]		Q9UHB9	31	46	54.1	5.71	2.4e-09	70730.2	HOMO SAPIENS	SRP68_HUMAN Signal recognition particle 68 kDa protein
5710	hIP190-13	hIP190-013	LARP7	[4]		Q4G0J3	32	50	45.2	5.52	9.4e-10	66899.2	HOMO SAPIENS	LARP7_HUMAN La-related protein 7
5711	hIP190-13	hIP190-013	LARP7	[5]		P19338	26	56	30.4	5.1	9.7e-09	76615	HOMO SAPIENS	NUCL_HUMAN Nucleolin
5712	hIP190-13	hIP190-013	LARP7	[6]		P04264	24	36	42.1	6.2	4.6e-11	66039.2	HOMO SAPIENS	K2C1_HUMAN Keratin, type II cytoskeletal 1
5713	hIP190-13	hIP190-013	LARP7	[6-1]	6	P35908	8	11	19.7	3.61	4.8e-06	65433.4	HOMO SAPIENS	K22E_HUMAN Keratin, type II cytoskeletal 2 epidermal
5714	hIP190-13	hIP190-013	LARP7	[6-2, 177-2]	1	P04259	4	5	6.7	2.26	4.4e-05	60067.4	HOMO SAPIENS	K2C6B_HUMAN Keratin, type II cytoskeletal 6B
5715	hIP190-13	hIP190-013	LARP7	[6-3, 177-3]	1	Q7Z794	2	3	3.3	3.61	4.8e-06	61901.9	HOMO SAPIENS	K2C1B_HUMAN Keratin, type II cytoskeletal 1b
5716	hIP190-13	hIP190-013	LARP7	[6-4, 177-5]	2	P19013	4	4	7.3	1.73	0.00047	57285.7	HOMO SAPIENS	K2C4_HUMAN Keratin, type II cytoskeletal 4
5717	hIP190-13	hIP190-013	LARP7	[7]		P08107	20	31	40.4	5.03	3.7e-08	70052.8	HOMO SAPIENS	HSP71_HUMAN Heat shock 70 kDa protein 1A/1B
5718	hIP190-13	hIP190-013	LARP7	[7-1]	15	P11142	17	25	31.9	4.88	6.3e-09	70898.7	HOMO SAPIENS	HSP7C_HUMAN Heat shock cognate 71 kDa protein
5719	hIP190-13	hIP190-013	LARP7	[7-2]	1	P34931	12	17	21.8	4.68	3.7e-08	70375.6	HOMO SAPIENS	HS71L_HUMAN Heat shock 70 kDa protein 1-like
5720	hIP190-13	hIP190-013	LARP7	[7-3]	1	P17066	5	8	10.1	4.9	8.1e-08	71028.7	HOMO SAPIENS	HSP76_HUMAN Heat shock 70 kDa protein 6
5721	hIP190-13	hIP190-013	LARP7	[7-4]	4	P54652	6	9	11.7	3.77	4.5e-07	70021.5	HOMO SAPIENS	HSP72_HUMAN Heat shock-related 70 kDa protein 2
5722	hIP190-13	hIP190-013	LARP7	[7-5]	4	P11021	5	6	10.1	4.07	1.1e-07	72333.5	HOMO SAPIENS	GRP78_HUMAN 78 kDa glucose-regulated protein
5723	hIP190-13	hIP190-013	LARP7	[7-6]	0	P48741	3	5	10.9	3.77	4.5e-07	40244.8	HOMO SAPIENS	HSP77_HUMAN Putative heat shock 70 kDa protein 7
5724	hIP190-13	hIP190-013	LARP7	[8]		P23396	19	33	72.8	5.97	4e-10	26688.6	HOMO SAPIENS	RS3_HUMAN 40S ribosomal protein S3
5725	hIP190-13	hIP190-013	LARP7	[9]		P61247	17	32	46.2	6.3	3.8e-10	29945.2	HOMO SAPIENS	RS3A_HUMAN 40S ribosomal protein S3a
5726	hIP190-13	hIP190-013	LARP7	[10]		P52292	18	59	41.4	4.88	3.6e-08	57862.4	HOMO SAPIENS	IMA2_HUMAN Importin subunit alpha-2
5727	hIP190-13	hIP190-013	LARP7	[10-1]	0	A9QM74	1	3	2.1	3.4	5.5e-06	56938.4	HOMO SAPIENS	IMA8_HUMAN Importin subunit alpha-8
5728	hIP190-13	hIP190-013	LARP7	[10-2]	0	A8MYJ9	1	2	4.9	0.69	0.0052	18296.8	HOMO SAPIENS	IMA2L_HUMAN Importin subunit alpha-2-like protein
5729	hIP190-13	hIP190-013	LARP7	[11]		P35527	18	22	44.8	5.31	1.9e-09	62064.8	HOMO SAPIENS	K1C9_HUMAN Keratin, type I cytoskeletal 9
5730	hIP190-13	hIP190-013	LARP7	[12]		P46777	19	39	52.2	4.7	1.8e-08	34362.9	HOMO SAPIENS	RL5_HUMAN 60S ribosomal protein L5
5731	hIP190-13	hIP190-013	LARP7	[13]		P07437	18	27	58.6	4.67	5.7e-08	49671.3	HOMO SAPIENS	TBB5_HUMAN Tubulin beta chain
5732	hIP190-13	hIP190-013	LARP7	[13-1]	4	P68371	16	21	52.4	4.14	1.4e-06	49831.5	HOMO SAPIENS	TBB4B_HUMAN Tubulin beta-4B chain
5733	hIP190-13	hIP190-013	LARP7	[13-2]	3	P04350	14	19	47.1	4.14	1.4e-06	49586.2	HOMO SAPIENS	TBB4A_HUMAN Tubulin beta-4A chain
5734	hIP190-13	hIP190-013	LARP7	[13-3]	2	Q13885	12	17	40.2	4.33	4.5e-07	49907.4	HOMO SAPIENS	TBB2A_HUMAN Tubulin beta-2A chain
5735	hIP190-13	hIP190-013	LARP7	[13-4]	2	Q9BVA1	12	17	40.2	4.33	4.5e-07	49953.5	HOMO SAPIENS	TBB2B_HUMAN Tubulin beta-2B chain
5736	hIP190-13	hIP190-013	LARP7	[13-5]	1	Q13509	8	10	18.9	4.08	4.5e-07	50433.2	HOMO SAPIENS	TBB3_HUMAN Tubulin beta-3 chain
5737	hIP190-13	hIP190-013	LARP7	[13-6]	1	Q3ZCM7	4	5	14	3.56	1.4e-06	49776.5	HOMO SAPIENS	TBB8_HUMAN Tubulin beta-8 chain
5738	hIP190-13	hIP190-013	LARP7	[13-7]	0	A6NNZ2	3	4	10.6	3.56	1.4e-06	49573.1	HOMO SAPIENS	TBB8B_HUMAN Tubulin beta-8 chain B
5739	hIP190-13	hIP190-013	LARP7	[13-8]	1	Q9BUF5	3	3	10.1	1.89	0.00018	49857.6	HOMO SAPIENS	TBB6_HUMAN Tubulin beta-6 chain
5740	hIP190-13	hIP190-013	LARP7	[13-9]	0	A6NKZ8	1	1	3.8	1.35	0.0048	41775.5	HOMO SAPIENS	YI016_HUMAN Putative tubulin beta chain-like protein ENSP00000290377
5741	hIP190-13	hIP190-013	LARP7	[14]		Q9BUJ2	17	19	26.8	5.26	7.2e-09	95739.3	HOMO SAPIENS	HNRL1_HUMAN Heterogeneous nuclear ribonucleoprotein U-like protein 1
5742	hIP190-13	hIP190-013	LARP7	[15]		P11940	17	20	34	5.04	1.2e-08	70671.5	HOMO SAPIENS	PABP1_HUMAN Polyadenylate-binding protein 1
5743	hIP190-13	hIP190-013	LARP7	[15-1]	2	Q13310	9	10	15.8	5.04	1.2e-08	70783.5	HOMO SAPIENS	PABP4_HUMAN Polyadenylate-binding protein 4
5744	hIP190-13	hIP190-013	LARP7	[15-2]	0	Q9H361	10	10	16.3	4.36	1.2e-08	70031.5	HOMO SAPIENS	PABP3_HUMAN Polyadenylate-binding protein 3
5745	hIP190-13	hIP190-013	LARP7	[15-3]	0	Q4VXU2	3	3	5.5	4.36	1.2e-08	68392.9	HOMO SAPIENS	PAP1L_HUMAN Polyadenylate-binding protein 1-like
5746	hIP190-13	hIP190-013	LARP7	[15-4]	0	Q5JQF8	1	1	5.5	1.95	2.3e-05	22799.2	HOMO SAPIENS	PAP1M_HUMAN Polyadenylate-binding protein 1-like 2
5747	hIP190-13	hIP190-013	LARP7	[16]		P67809	11	29	63.6	5.86	2.8e-08	35924.5	HOMO SAPIENS	YBOX1_HUMAN Nuclease-sensitive element-binding protein 1
5748	hIP190-13	hIP190-013	LARP7	[16-1]	5	P16989	7	12	41.7	5.21	2.4e-08	40090.2	HOMO SAPIENS	DBPA_HUMAN DNA-binding protein A
5749	hIP190-13	hIP190-013	LARP7	[16-2]	0	Q9Y2T7	2	5	8.8	5.18	2.8e-08	38518.3	HOMO SAPIENS	YBOX2_HUMAN Y-box-binding protein 2
5750	hIP190-13	hIP190-013	LARP7	[17]		P36578	18	22	42.2	4.11	2.2e-07	47697.7	HOMO SAPIENS	RL4_HUMAN 60S ribosomal protein L4
5751	hIP190-13	hIP190-013	LARP7	[18]		P68363	14	20	43	5.13	7.6e-09	50152.1	HOMO SAPIENS	TBA1B_HUMAN Tubulin alpha-1B chain
5752	hIP190-13	hIP190-013	LARP7	[18-1]	0	Q71U36	12	18	37	5.13	7.6e-09	50136.1	HOMO SAPIENS	TBA1A_HUMAN Tubulin alpha-1A chain
5753	hIP190-13	hIP190-013	LARP7	[18-2]	0	Q9BQE3	10	15	28.5	5.13	7.6e-09	49895.8	HOMO SAPIENS	TBA1C_HUMAN Tubulin alpha-1C chain
5754	hIP190-13	hIP190-013	LARP7	[18-3]	0	Q13748	7	11	23.3	5.13	7.6e-09	49960	HOMO SAPIENS	TBA3C_HUMAN Tubulin alpha-3C/D chain
5755	hIP190-13	hIP190-013	LARP7	[18-4]	0	P68366	9	12	24.8	3.19	8e-06	49924.9	HOMO SAPIENS	TBA4A_HUMAN Tubulin alpha-4A chain
5756	hIP190-13	hIP190-013	LARP7	[18-5]	0	Q6PEY2	6	9	18.7	5.13	7.6e-09	49859	HOMO SAPIENS	TBA3E_HUMAN Tubulin alpha-3E chain
5757	hIP190-13	hIP190-013	LARP7	[18-6]	0	Q9NY65	3	4	10.9	3.19	8e-06	50094	HOMO SAPIENS	TBA8_HUMAN Tubulin alpha-8 chain
5758	hIP190-13	hIP190-013	LARP7	[18-7]	0	A6NHL2	2	2	2	1.93	5.6e-05	49909.2	HOMO SAPIENS	TBAL3_HUMAN Tubulin alpha chain-like 3
5759	hIP190-13	hIP190-013	LARP7	[18-8]	0	Q9H853	1	1	5.8	2.68	8e-06	27551.5	HOMO SAPIENS	TBA4B_HUMAN Putative tubulin-like protein alpha-4B
5760	hIP190-13	hIP190-013	LARP7	[19]		O60684	13	21	33	4.79	8.6e-08	60030	HOMO SAPIENS	IMA7_HUMAN Importin subunit alpha-7
5761	hIP190-13	hIP190-013	LARP7	[19-1]	6	P52294	10	13	21	3.47	5e-06	60222.3	HOMO SAPIENS	IMA1_HUMAN Importin subunit alpha-1
5762	hIP190-13	hIP190-013	LARP7	[19-2]	2	O15131	7	10	14.2	4.79	8.6e-08	60349.5	HOMO SAPIENS	IMA5_HUMAN Importin subunit alpha-6
5763	hIP190-13	hIP190-013	LARP7	[20]		Q7L2J0	19	36	40.6	3.66	4.5e-07	74355.8	HOMO SAPIENS	MEPCE_HUMAN 7SK snRNA methylphosphate capping enzyme
5764	hIP190-13	hIP190-013	LARP7	[21]		P25398	9	20	57.6	7.16	3.8e-11	14515.1	HOMO SAPIENS	RS12_HUMAN 40S ribosomal protein S12
5765	hIP190-13	hIP190-013	LARP7	[22]		P10155	13	17	39	4.87	1.1e-08	60671.2	HOMO SAPIENS	RO60_HUMAN 60 kDa SS-A/Ro ribonucleoprotein
5766	hIP190-13	hIP190-013	LARP7	[23]		P62701	16	27	55.1	3.91	1.4e-07	29598	HOMO SAPIENS	RS4X_HUMAN 40S ribosomal protein S4, X isoform
5767	hIP190-13	hIP190-013	LARP7	[23-1]	0	Q8TD47	5	7	18.3	2.52	1e-05	29295.7	HOMO SAPIENS	RS4Y2_HUMAN 40S ribosomal protein S4, Y isoform 2
5768	hIP190-13	hIP190-013	LARP7	[23-2]	0	P22090	4	6	16	2.52	1e-05	29455.9	HOMO SAPIENS	RS4Y1_HUMAN 40S ribosomal protein S4, Y isoform 1
5769	hIP190-13	hIP190-013	LARP7	[24]		P06748	13	33	34	4.61	1.4e-08	32575.3	HOMO SAPIENS	NPM_HUMAN Nucleophosmin
5770	hIP190-13	hIP190-013	LARP7	[25]		P37108	11	26	50	5.16	4.2e-08	14570.1	HOMO SAPIENS	SRP14_HUMAN Signal recognition particle 14 kDa protein
5771	hIP190-13	hIP190-013	LARP7	[26]		P50990	11	11	23.2	5.29	4.8e-09	59621.1	HOMO SAPIENS	TCPQ_HUMAN T-complex protein 1 subunit theta
5772	hIP190-13	hIP190-013	LARP7	[27]		P13645	11	11	25	5.74	3.6e-10	58827.5	HOMO SAPIENS	K1C10_HUMAN Keratin, type I cytoskeletal 10
5773	hIP190-13	hIP190-013	LARP7	[27-1]	2	P02533	5	5	8.5	2.73	1.7e-06	51561.9	HOMO SAPIENS	K1C14_HUMAN Keratin, type I cytoskeletal 14
5774	hIP190-13	hIP190-013	LARP7	[27-2]	1	P08779	4	4	5.3	1.6	0.00089	51268.3	HOMO SAPIENS	K1C16_HUMAN Keratin, type I cytoskeletal 16
5775	hIP190-13	hIP190-013	LARP7	[27-3]	0	Q7Z3Y7	4	4	5.4	1.55	0.00032	50567.8	HOMO SAPIENS	K1C28_HUMAN Keratin, type I cytoskeletal 28
5776	hIP190-13	hIP190-013	LARP7	[27-4]	0	Q7Z3Y8	3	3	3.9	1.55	0.00032	49822.8	HOMO SAPIENS	K1C27_HUMAN Keratin, type I cytoskeletal 27
5777	hIP190-13	hIP190-013	LARP7	[27-5]	0	Q7Z3Z0	3	3	4	1.55	0.00032	49318.3	HOMO SAPIENS	K1C25_HUMAN Keratin, type I cytoskeletal 25
5778	hIP190-13	hIP190-013	LARP7	[27-6]	1	P08727	2	2	4	1.6	0.00089	44106.3	HOMO SAPIENS	K1C19_HUMAN Keratin, type I cytoskeletal 19
5779	hIP190-13	hIP190-013	LARP7	[27-7]	1	P19012	2	2	3.5	1.6	0.00089	49212.1	HOMO SAPIENS	K1C15_HUMAN Keratin, type I cytoskeletal 15
5780	hIP190-13	hIP190-013	LARP7	[27-8]	1	Q04695	2	2	3.7	1.6	0.00089	48106.1	HOMO SAPIENS	K1C17_HUMAN Keratin, type I cytoskeletal 17
5781	hIP190-13	hIP190-013	LARP7	[27-9]	0	Q7Z3Y9	2	2	1.9	1.28	0.0016	51911.1	HOMO SAPIENS	K1C26_HUMAN Keratin, type I cytoskeletal 26
5782	hIP190-13	hIP190-013	LARP7	[28]		P15880	12	24	35.5	3.69	3e-06	31324.7	HOMO SAPIENS	RS2_HUMAN 40S ribosomal protein S2
5783	hIP190-13	hIP190-013	LARP7	[29]		O43390	15	16	31.9	3.75	6.7e-07	70943.6	HOMO SAPIENS	HNRPR_HUMAN Heterogeneous nuclear ribonucleoprotein R
5784	hIP190-13	hIP190-013	LARP7	[29-1]	8	O60506	12	15	33.7	2.91	1.9e-05	69603.2	HOMO SAPIENS	HNRPQ_HUMAN Heterogeneous nuclear ribonucleoprotein Q
5785	hIP190-13	hIP190-013	LARP7	[30]		Q9NR30	12	12	21.2	4.05	2.7e-07	87345.1	HOMO SAPIENS	DDX21_HUMAN Nucleolar RNA helicase 2
5786	hIP190-13	hIP190-013	LARP7	[31]		P46782	9	20	51	5.46	2.8e-09	22876.6	HOMO SAPIENS	RS5_HUMAN 40S ribosomal protein S5
5787	hIP190-13	hIP190-013	LARP7	[32]		Q08211	16	17	23.8	3.43	1.3e-06	140960	HOMO SAPIENS	DHX9_HUMAN ATP-dependent RNA helicase A
5788	hIP190-13	hIP190-013	LARP7	[33]		P62241	9	15	47.6	4.91	6e-08	24205.4	HOMO SAPIENS	RS8_HUMAN 40S ribosomal protein S8
5789	hIP190-13	hIP190-013	LARP7	[34]		P30050	9	15	58.8	4.91	4e-08	17818.7	HOMO SAPIENS	RL12_HUMAN 60S ribosomal protein L12
5790	hIP190-13	hIP190-013	LARP7	[35]		Q9NZI8	10	10	24.4	4.77	5.5e-08	63481.1	HOMO SAPIENS	IF2B1_HUMAN Insulin-like growth factor 2 mRNA-binding protein 1
5791	hIP190-13	hIP190-013	LARP7	[35-1]	2	O00425	3	3	6.9	2.88	2.4e-06	63705.6	HOMO SAPIENS	IF2B3_HUMAN Insulin-like growth factor 2 mRNA-binding protein 3
5792	hIP190-13	hIP190-013	LARP7	[35-2]	0	Q9Y6M1	1	1	2.2	2.88	2.4e-06	66121.9	HOMO SAPIENS	IF2B2_HUMAN Insulin-like growth factor 2 mRNA-binding protein 2
5793	hIP190-13	hIP190-013	LARP7	[36]		O43395	13	13	29.3	3.82	5.8e-07	77529.6	HOMO SAPIENS	PRPF3_HUMAN U4/U6 small nuclear ribonucleoprotein Prp3
5794	hIP190-13	hIP190-013	LARP7	[37]		Q00839	9	12	15.4	5.22	1.5e-08	90585.2	HOMO SAPIENS	HNRPU_HUMAN Heterogeneous nuclear ribonucleoprotein U
5795	hIP190-13	hIP190-013	LARP7	[38]		P27635	10	15	35	4.42	2.5e-07	24604.1	HOMO SAPIENS	RL10_HUMAN 60S ribosomal protein L10
5796	hIP190-13	hIP190-013	LARP7	[38-1]	0	Q96L21	4	4	15	2.37	1.9e-05	24519	HOMO SAPIENS	RL10L_HUMAN 60S ribosomal protein L10-like
5797	hIP190-13	hIP190-013	LARP7	[39]		P39023	13	18	33	3.66	6.6e-07	46109.3	HOMO SAPIENS	RL3_HUMAN 60S ribosomal protein L3
5798	hIP190-13	hIP190-013	LARP7	[40]		P05388	11	17	53.6	3.78	3.3e-07	34273.8	HOMO SAPIENS	RLA0_HUMAN 60S acidic ribosomal protein P0
5799	hIP190-13	hIP190-013	LARP7	[40-1]	0	Q8NHW5	6	10	25.2	3.36	3.2e-06	34364.8	HOMO SAPIENS	RLA0L_HUMAN 60S acidic ribosomal protein P0-like
5800	hIP190-13	hIP190-013	LARP7	[41]		P82933	8	9	26.3	5.34	6.7e-09	45835.2	HOMO SAPIENS	RT09_HUMAN 28S ribosomal protein S9, mitochondrial
5801	hIP190-13	hIP190-013	LARP7	[42]		P08865	8	9	38.6	5.09	2.7e-08	32854.4	HOMO SAPIENS	RSSA_HUMAN 40S ribosomal protein SA
5802	hIP190-13	hIP190-013	LARP7	[43]		P52272	11	11	21.8	4.42	2.8e-08	77516.4	HOMO SAPIENS	HNRPM_HUMAN Heterogeneous nuclear ribonucleoprotein M
5803	hIP190-13	hIP190-013	LARP7	[44]		P09132	9	12	43.1	4.63	3.3e-08	16155.8	HOMO SAPIENS	SRP19_HUMAN Signal recognition particle 19 kDa protein
5804	hIP190-13	hIP190-013	LARP7	[45]		Q7L2E3	14	15	15.8	2.77	2.2e-05	133939	HOMO SAPIENS	DHX30_HUMAN Putative ATP-dependent RNA helicase DHX30
5805	hIP190-13	hIP190-013	LARP7	[46]		Q9H6E5	10	13	19.1	4.24	6.4e-08	93847.7	HOMO SAPIENS	STPAP_HUMAN Speckle targeted PIP5K1A-regulated poly(A) polymerase
5806	hIP190-13	hIP190-013	LARP7	[47]		P46783	8	14	48.5	5.09	2.9e-08	18897.9	HOMO SAPIENS	RS10_HUMAN 40S ribosomal protein S10
5807	hIP190-13	hIP190-013	LARP7	[47-1]	0	Q9NQ39	3	6	17.6	5.09	2.9e-08	20120.5	HOMO SAPIENS	RS10L_HUMAN Putative 40S ribosomal protein S10-like
5808	hIP190-13	hIP190-013	LARP7	[48]		P62829	9	21	42.1	5.33	1.7e-10	14865.6	HOMO SAPIENS	RL23_HUMAN 60S ribosomal protein L23
5809	hIP190-13	hIP190-013	LARP7	[49]		P78371	8	8	21.3	4.31	1.2e-06	57488.7	HOMO SAPIENS	TCPB_HUMAN T-complex protein 1 subunit beta
5810	hIP190-13	hIP190-013	LARP7	[50]		Q96EY7	8	9	15.8	4.21	1.1e-06	78550.4	HOMO SAPIENS	PTCD3_HUMAN Pentatricopeptide repeat-containing protein 3, mitochondrial
5811	hIP190-13	hIP190-013	LARP7	[51]		O60814	7	14	35.7	5.54	4.6e-10	13890.3	HOMO SAPIENS	H2B1K_HUMAN Histone H2B type 1-K
5812	hIP190-13	hIP190-013	LARP7	[51-1]	0	P57053	7	14	35.7	5.54	4.6e-10	13944.3	HOMO SAPIENS	H2BFS_HUMAN Histone H2B type F-S
5813	hIP190-13	hIP190-013	LARP7	[51-2]	0	P58876	7	14	35.7	5.54	4.6e-10	13936.3	HOMO SAPIENS	H2B1D_HUMAN Histone H2B type 1-D
5814	hIP190-13	hIP190-013	LARP7	[51-3]	0	P62807	7	14	35.7	5.54	4.6e-10	13906.3	HOMO SAPIENS	H2B1C_HUMAN Histone H2B type 1-C/E/F/G/I
5815	hIP190-13	hIP190-013	LARP7	[51-4]	0	Q5QNW6	7	14	35.7	5.54	4.6e-10	13920.3	HOMO SAPIENS	H2B2F_HUMAN Histone H2B type 2-F
5816	hIP190-13	hIP190-013	LARP7	[51-5]	0	Q93079	7	14	35.7	5.54	4.6e-10	13892.2	HOMO SAPIENS	H2B1H_HUMAN Histone H2B type 1-H
5817	hIP190-13	hIP190-013	LARP7	[51-6]	0	Q99877	7	14	35.7	5.54	4.6e-10	13922.3	HOMO SAPIENS	H2B1N_HUMAN Histone H2B type 1-N
5818	hIP190-13	hIP190-013	LARP7	[51-7]	0	Q99879	7	14	35.7	5.54	4.6e-10	13989.4	HOMO SAPIENS	H2B1M_HUMAN Histone H2B type 1-M
5819	hIP190-13	hIP190-013	LARP7	[51-8]	0	Q99880	7	14	35.7	5.54	4.6e-10	13952.3	HOMO SAPIENS	H2B1L_HUMAN Histone H2B type 1-L
5820	hIP190-13	hIP190-013	LARP7	[51-9]	0	P06899	6	13	27.8	5.54	4.6e-10	13904.3	HOMO SAPIENS	H2B1J_HUMAN Histone H2B type 1-J
5821	hIP190-13	hIP190-013	LARP7	[51-10]	0	P23527	6	13	27.8	5.54	4.6e-10	13906.3	HOMO SAPIENS	H2B1O_HUMAN Histone H2B type 1-O
5822	hIP190-13	hIP190-013	LARP7	[51-11]	0	P33778	6	13	27.8	5.54	4.6e-10	13950.3	HOMO SAPIENS	H2B1B_HUMAN Histone H2B type 1-B
5823	hIP190-13	hIP190-013	LARP7	[51-12]	0	Q16778	6	13	27.8	5.54	4.6e-10	13920.3	HOMO SAPIENS	H2B2E_HUMAN Histone H2B type 2-E
5824	hIP190-13	hIP190-013	LARP7	[51-13]	0	Q8N257	6	13	27.8	5.54	4.6e-10	13908.2	HOMO SAPIENS	H2B3B_HUMAN Histone H2B type 3-B
5825	hIP190-13	hIP190-013	LARP7	[51-14]	0	Q96A08	3	6	15.7	2.28	3.3e-05	14167.6	HOMO SAPIENS	H2B1A_HUMAN Histone H2B type 1-A
5826	hIP190-13	hIP190-013	LARP7	[52]		P68400	10	18	41.7	3.77	2e-07	45144	HOMO SAPIENS	CSK21_HUMAN Casein kinase II subunit alpha
5827	hIP190-13	hIP190-013	LARP7	[52-1]	8	P19784	9	10	38	3.68	3.2e-07	41213.6	HOMO SAPIENS	CSK22_HUMAN Casein kinase II subunit alpha'
5828	hIP190-13	hIP190-013	LARP7	[53]		Q12906	8	9	21.6	4.08	1.7e-06	95339.2	HOMO SAPIENS	ILF3_HUMAN Interleukin enhancer-binding factor 3
5829	hIP190-13	hIP190-013	LARP7	[54]		P38646	9	9	20.5	3.49	5e-07	73681.1	HOMO SAPIENS	GRP75_HUMAN Stress-70 protein, mitochondrial
5830	hIP190-13	hIP190-013	LARP7	[55]		P62753	9	10	31.3	4	3.4e-07	28680.9	HOMO SAPIENS	RS6_HUMAN 40S ribosomal protein S6
5831	hIP190-13	hIP190-013	LARP7	[56]		P62263	9	15	40.4	3.75	5.6e-07	16272.9	HOMO SAPIENS	RS14_HUMAN 40S ribosomal protein S14
5832	hIP190-13	hIP190-013	LARP7	[57]		P68104	10	13	27.9	3.4	1.8e-06	50141.3	HOMO SAPIENS	EF1A1_HUMAN Elongation factor 1-alpha 1
5833	hIP190-13	hIP190-013	LARP7	[57-1]	0	Q5VTE0	10	13	27.9	3.4	1.8e-06	50185.5	HOMO SAPIENS	EF1A3_HUMAN Putative elongation factor 1-alpha-like 3
5834	hIP190-13	hIP190-013	LARP7	[57-2]	0	Q05639	4	4	10.4	2.46	9e-06	50470.6	HOMO SAPIENS	EF1A2_HUMAN Elongation factor 1-alpha 2
5835	hIP190-13	hIP190-013	LARP7	[58]		P05387	6	12	76.5	5.11	2.3e-08	11665	HOMO SAPIENS	RLA2_HUMAN 60S acidic ribosomal protein P2
5836	hIP190-13	hIP190-013	LARP7	[59]		Q9Y2X3	5	5	13.6	6.95	1.1e-11	59578.7	HOMO SAPIENS	NOP58_HUMAN Nucleolar protein 58
5837	hIP190-13	hIP190-013	LARP7	[60]		P08708	9	13	60	3.55	5e-07	15550.3	HOMO SAPIENS	RS17_HUMAN 40S ribosomal protein S17
5838	hIP190-13	hIP190-013	LARP7	[60-1]	0	P0CW22	9	13	60	3.55	5e-07	15550.3	HOMO SAPIENS	RS17L_HUMAN 40S ribosomal protein S17-like
5839	hIP190-13	hIP190-013	LARP7	[61]		P17987	10	12	25.2	3.12	3e-06	60344.1	HOMO SAPIENS	TCPA_HUMAN T-complex protein 1 subunit alpha
5840	hIP190-13	hIP190-013	LARP7	[62]		P62249	12	19	58.9	2.71	6.4e-06	16445.5	HOMO SAPIENS	RS16_HUMAN 40S ribosomal protein S16
5841	hIP190-13	hIP190-013	LARP7	[63]		P22626	6	8	21.5	5.99	6.5e-11	37430	HOMO SAPIENS	ROA2_HUMAN Heterogeneous nuclear ribonucleoproteins A2/B1
5842	hIP190-13	hIP190-013	LARP7	[64]		P62269	9	20	48	3.42	1.7e-06	17718.8	HOMO SAPIENS	RS18_HUMAN 40S ribosomal protein S18
5843	hIP190-13	hIP190-013	LARP7	[65]		P62280	9	11	53.2	4.13	6.9e-08	18430.9	HOMO SAPIENS	RS11_HUMAN 40S ribosomal protein S11
5844	hIP190-13	hIP190-013	LARP7	[66]		P35637	7	12	22.8	3.99	9e-07	53426.2	HOMO SAPIENS	FUS_HUMAN RNA-binding protein FUS
5845	hIP190-13	hIP190-013	LARP7	[67]		P39019	11	14	55.2	3.07	1.7e-06	16060.6	HOMO SAPIENS	RS19_HUMAN 40S ribosomal protein S19
5846	hIP190-13	hIP190-013	LARP7	[68]		P08238	6	6	11.3	4.62	1.4e-07	83264.9	HOMO SAPIENS	HS90B_HUMAN Heat shock protein HSP 90-beta
5847	hIP190-13	hIP190-013	LARP7	[68-1]	3	P07900	5	5	9.3	4.74	6.6e-08	84660.4	HOMO SAPIENS	HS90A_HUMAN Heat shock protein HSP 90-alpha
5848	hIP190-13	hIP190-013	LARP7	[68-2]	0	Q12931	1	1	2	4.16	2.3e-06	80110.7	HOMO SAPIENS	TRAP1_HUMAN Heat shock protein 75 kDa, mitochondrial
5849	hIP190-13	hIP190-013	LARP7	[68-3]	0	Q58FG1	1	1	3.1	3.22	1.5e-06	47712.3	HOMO SAPIENS	HS904_HUMAN Putative heat shock protein HSP 90-alpha A4
5850	hIP190-13	hIP190-013	LARP7	[68-4]	0	Q58FF7	1	1	1.8	0.9	0.0017	68325.4	HOMO SAPIENS	H90B3_HUMAN Putative heat shock protein HSP 90-beta-3
5851	hIP190-13	hIP190-013	LARP7	[69]		P26641	6	6	17.8	4.56	2.7e-07	50119.2	HOMO SAPIENS	EF1G_HUMAN Elongation factor 1-gamma
5852	hIP190-13	hIP190-013	LARP7	[70]		P62081	6	10	41.2	4.46	1.2e-06	22127	HOMO SAPIENS	RS7_HUMAN 40S ribosomal protein S7
5853	hIP190-13	hIP190-013	LARP7	[71]		Q14974	6	6	9.6	3.99	1.2e-06	97171.1	HOMO SAPIENS	IMB1_HUMAN Importin subunit beta-1
5854	hIP190-13	hIP190-013	LARP7	[72]		P49458	7	14	64	3.74	4.6e-06	10111.8	HOMO SAPIENS	SRP09_HUMAN Signal recognition particle 9 kDa protein
5855	hIP190-13	hIP190-013	LARP7	[73]		P62841	5	8	31.7	5.65	1.6e-09	17040.3	HOMO SAPIENS	RS15_HUMAN 40S ribosomal protein S15
5856	hIP190-13	hIP190-013	LARP7	[74]		Q07021	5	26	24.5	5.03	2.7e-08	31362.5	HOMO SAPIENS	C1QBP_HUMAN Complement component 1 Q subcomponent-binding protein, mitochondrial
5857	hIP190-13	hIP190-013	LARP7	[75]		P63261	6	7	28.3	4.82	4.3e-09	41793.2	HOMO SAPIENS	ACTG_HUMAN Actin, cytoplasmic 2
5858	hIP190-13	hIP190-013	LARP7	[75-1]	0	P60709	5	6	23.5	4.36	7e-08	41737.1	HOMO SAPIENS	ACTB_HUMAN Actin, cytoplasmic 1
5859	hIP190-13	hIP190-013	LARP7	[75-2]	0	Q6S8J3	3	4	4.6	4.36	7e-08	121365	HOMO SAPIENS	POTEE_HUMAN POTE ankyrin domain family member E
5860	hIP190-13	hIP190-013	LARP7	[75-3]	0	P62736	3	4	9.8	1.95	7.9e-05	42009.4	HOMO SAPIENS	ACTA_HUMAN Actin, aortic smooth muscle
5861	hIP190-13	hIP190-013	LARP7	[75-4]	0	P63267	3	4	9.8	1.95	7.9e-05	41877.3	HOMO SAPIENS	ACTH_HUMAN Actin, gamma-enteric smooth muscle
5862	hIP190-13	hIP190-013	LARP7	[75-5]	0	P68032	3	4	9.8	1.95	7.9e-05	42019.4	HOMO SAPIENS	ACTC_HUMAN Actin, alpha cardiac muscle 1
5863	hIP190-13	hIP190-013	LARP7	[75-6]	0	P68133	3	4	9.8	1.95	7.9e-05	42051.4	HOMO SAPIENS	ACTS_HUMAN Actin, alpha skeletal muscle
5864	hIP190-13	hIP190-013	LARP7	[75-7]	0	A5A3E0	2	3	2.4	1.95	7.9e-05	121446	HOMO SAPIENS	POTEF_HUMAN POTE ankyrin domain family member F
5865	hIP190-13	hIP190-013	LARP7	[75-8]	1	Q9BYX7	2	3	14.7	1.68	7.9e-05	42016.6	HOMO SAPIENS	ACTBM_HUMAN Putative beta-actin-like protein 3
5866	hIP190-13	hIP190-013	LARP7	[75-9]	0	Q562R1	1	2	4.3	1.68	7.9e-05	42003.6	HOMO SAPIENS	ACTBL_HUMAN Beta-actin-like protein 2
5867	hIP190-13	hIP190-013	LARP7	[75-10]	0	P0CG38	1	1	0.9	1.54	0.00096	121284	HOMO SAPIENS	POTEI_HUMAN POTE ankyrin domain family member I
5868	hIP190-13	hIP190-013	LARP7	[75-11]	0	P0CG39	1	1	1	1.54	0.00096	117391	HOMO SAPIENS	POTEJ_HUMAN POTE ankyrin domain family member J
5869	hIP190-13	hIP190-013	LARP7	[76]		P21333	11	11	7.7	2.56	6.4e-06	280741	HOMO SAPIENS	FLNA_HUMAN Filamin-A
5870	hIP190-13	hIP190-013	LARP7	[77]		P06576	6	7	22.1	4.44	4.5e-07	56560.4	HOMO SAPIENS	ATPB_HUMAN ATP synthase subunit beta, mitochondrial
5871	hIP190-13	hIP190-013	LARP7	[78]		O00505	7	9	23.6	3.79	8.8e-07	57811.4	HOMO SAPIENS	IMA3_HUMAN Importin subunit alpha-3
5872	hIP190-13	hIP190-013	LARP7	[78-1]	7	O00629	8	10	26.9	2.67	6e-06	57887.2	HOMO SAPIENS	IMA4_HUMAN Importin subunit alpha-4
5873	hIP190-13	hIP190-013	LARP7	[79]		P49368	10	10	30.3	3.05	6.9e-06	60534.5	HOMO SAPIENS	TCPG_HUMAN T-complex protein 1 subunit gamma
5874	hIP190-13	hIP190-013	LARP7	[80]		P82650	8	8	34.2	3.24	1.7e-05	41280.7	HOMO SAPIENS	RT22_HUMAN 28S ribosomal protein S22, mitochondrial
5875	hIP190-13	hIP190-013	LARP7	[81]		O43172	10	13	25.9	3.11	1.3e-06	58449.7	HOMO SAPIENS	PRP4_HUMAN U4/U6 small nuclear ribonucleoprotein Prp4
5876	hIP190-13	hIP190-013	LARP7	[82]		P16403	6	11	25.8	4.04	1.4e-07	21364.9	HOMO SAPIENS	H12_HUMAN Histone H1.2
5877	hIP190-13	hIP190-013	LARP7	[82-1]	2	P10412	6	11	25.1	2.95	3.6e-06	21865.4	HOMO SAPIENS	H14_HUMAN Histone H1.4
5878	hIP190-13	hIP190-013	LARP7	[82-2]	0	P16402	4	8	15.4	2.95	3.6e-06	22350.1	HOMO SAPIENS	H13_HUMAN Histone H1.3
5879	hIP190-13	hIP190-013	LARP7	[82-3]	1	Q02539	2	3	15.3	2.95	3.6e-06	21842.3	HOMO SAPIENS	H11_HUMAN Histone H1.1
5880	hIP190-13	hIP190-013	LARP7	[82-4]	0	P22492	1	2	5.3	2.95	3.6e-06	22019.2	HOMO SAPIENS	H1T_HUMAN Histone H1t
5881	hIP190-13	hIP190-013	LARP7	[83]		P09651	6	6	22.6	4.92	6e-09	38746.9	HOMO SAPIENS	ROA1_HUMAN Heterogeneous nuclear ribonucleoprotein A1
5882	hIP190-13	hIP190-013	LARP7	[83-1]	0	Q32P51	3	3	8.4	1.96	5.7e-05	34225.6	HOMO SAPIENS	RA1L2_HUMAN Heterogeneous nuclear ribonucleoprotein A1-like 2
5883	hIP190-13	hIP190-013	LARP7	[84]		P13010	7	7	22	3.44	9e-06	82705.3	HOMO SAPIENS	XRCC5_HUMAN X-ray repair cross-complementing protein 5
5884	hIP190-13	hIP190-013	LARP7	[85]		Q13428	7	7	7.3	4.02	1.3e-07	152107	HOMO SAPIENS	TCOF_HUMAN Treacle protein
5885	hIP190-13	hIP190-013	LARP7	[86]		P62913	5	9	27.5	5.04	2.1e-08	20252.6	HOMO SAPIENS	RL11_HUMAN 60S ribosomal protein L11
5886	hIP190-13	hIP190-013	LARP7	[87]		P62316	6	8	49.2	4.03	1.4e-07	13527	HOMO SAPIENS	SMD2_HUMAN Small nuclear ribonucleoprotein Sm D2
5887	hIP190-13	hIP190-013	LARP7	[88]		P78347	12	12	23.6	2.47	1.4e-05	112417	HOMO SAPIENS	GTF2I_HUMAN General transcription factor II-I
5888	hIP190-13	hIP190-013	LARP7	[89]		P67870	6	9	45.1	4.42	4e-08	24942.7	HOMO SAPIENS	CSK2B_HUMAN Casein kinase II subunit beta
5889	hIP190-13	hIP190-013	LARP7	[90]		P46781	8	12	31.4	3.48	1.1e-06	22591.6	HOMO SAPIENS	RS9_HUMAN 40S ribosomal protein S9
5890	hIP190-13	hIP190-013	LARP7	[91]		P50991	7	7	23.7	3.7	4.9e-07	57924.8	HOMO SAPIENS	TCPD_HUMAN T-complex protein 1 subunit delta
5891	hIP190-13	hIP190-013	LARP7	[92]		Q99832	6	6	15.5	3.89	2.9e-07	59367.2	HOMO SAPIENS	TCPH_HUMAN T-complex protein 1 subunit eta
5892	hIP190-13	hIP190-013	LARP7	[93]		Q99575	10	10	14.6	2.39	4.5e-05	114710	HOMO SAPIENS	POP1_HUMAN Ribonucleases P/MRP protein subunit POP1
5893	hIP190-13	hIP190-013	LARP7	[94]		P50914	6	9	23.7	3.92	6.7e-07	23432.1	HOMO SAPIENS	RL14_HUMAN 60S ribosomal protein L14
5894	hIP190-13	hIP190-013	LARP7	[95]		P18124	8	10	25.4	3.28	9.6e-07	29226	HOMO SAPIENS	RL7_HUMAN 60S ribosomal protein L7
5895	hIP190-13	hIP190-013	LARP7	[96]		P48643	7	7	21.1	3.59	6.4e-07	59671.6	HOMO SAPIENS	TCPE_HUMAN T-complex protein 1 subunit epsilon
5896	hIP190-13	hIP190-013	LARP7	[97]		P10809	6	7	17.8	3.72	3.6e-06	61055.2	HOMO SAPIENS	CH60_HUMAN 60 kDa heat shock protein, mitochondrial
5897	hIP190-13	hIP190-013	LARP7	[98]		Q92552	7	8	24.2	3.45	1.7e-06	47611.8	HOMO SAPIENS	RT27_HUMAN 28S ribosomal protein S27, mitochondrial
5898	hIP190-13	hIP190-013	LARP7	[99]		P29692	5	6	25.6	4.12	8.2e-07	31122.1	HOMO SAPIENS	EF1D_HUMAN Elongation factor 1-delta
5899	hIP190-13	hIP190-013	LARP7	[100]		P62277	7	11	46.4	2.99	1.2e-05	17222.4	HOMO SAPIENS	RS13_HUMAN 40S ribosomal protein S13
5900	hIP190-13	hIP190-013	LARP7	[101]		P25705	8	8	19.9	2.84	9.2e-06	59751.1	HOMO SAPIENS	ATPA_HUMAN ATP synthase subunit alpha, mitochondrial
5901	hIP190-13	hIP190-013	LARP7	[102]		Q6PKG0	6	7	10.7	3.15	0.00012	123511	HOMO SAPIENS	LARP1_HUMAN La-related protein 1
5902	hIP190-13	hIP190-013	LARP7	[102-1]	0	Q659C4	1	1	1.5	1.31	0.00012	105323	HOMO SAPIENS	LAR1B_HUMAN La-related protein 1B
5903	hIP190-13	hIP190-013	LARP7	[103]		P62244	7	8	46.2	3.2	6.5e-06	14839.6	HOMO SAPIENS	RS15A_HUMAN 40S ribosomal protein S15a
5904	hIP190-13	hIP190-013	LARP7	[104]		P62424	7	14	29.7	3.18	2.6e-06	29995.9	HOMO SAPIENS	RL7A_HUMAN 60S ribosomal protein L7a
5905	hIP190-13	hIP190-013	LARP7	[105]		Q12905	5	6	18.7	3.88	1.1e-06	43062.5	HOMO SAPIENS	ILF2_HUMAN Interleukin enhancer-binding factor 2
5906	hIP190-13	hIP190-013	LARP7	[106]		P62318	5	9	42.1	3.67	1.5e-06	13916.4	HOMO SAPIENS	SMD3_HUMAN Small nuclear ribonucleoprotein Sm D3
5907	hIP190-13	hIP190-013	LARP7	[107]		P62750	5	8	37.2	4.01	1.9e-06	17695.2	HOMO SAPIENS	RL23A_HUMAN 60S ribosomal protein L23a
5908	hIP190-13	hIP190-013	LARP7	[108]		P62857	6	11	52.2	3.3	6.9e-06	7841.1	HOMO SAPIENS	RS28_HUMAN 40S ribosomal protein S28
5909	hIP190-13	hIP190-013	LARP7	[109]		Q92665	5	5	17	3.71	1.4e-07	45318.8	HOMO SAPIENS	RT31_HUMAN 28S ribosomal protein S31, mitochondrial
5910	hIP190-13	hIP190-013	LARP7	[110]		P62888	6	8	58.3	2.95	3.5e-05	12784.2	HOMO SAPIENS	RL30_HUMAN 60S ribosomal protein L30
5911	hIP190-13	hIP190-013	LARP7	[111]		P84098	3	6	13.8	6.11	4.7e-09	23466.2	HOMO SAPIENS	RL19_HUMAN 60S ribosomal protein L19
5912	hIP190-13	hIP190-013	LARP7	[112]		P26373	6	9	20.4	2.9	4.2e-05	24261.7	HOMO SAPIENS	RL13_HUMAN 60S ribosomal protein L13
5913	hIP190-13	hIP190-013	LARP7	[113]		Q15365	6	6	30.6	2.94	1.6e-05	37498.2	HOMO SAPIENS	PCBP1_HUMAN Poly(rC)-binding protein 1
5914	hIP190-13	hIP190-013	LARP7	[113-1]	3	Q15366	4	4	18.1	2.11	0.00014	38580.4	HOMO SAPIENS	PCBP2_HUMAN Poly(rC)-binding protein 2
5915	hIP190-13	hIP190-013	LARP7	[113-2]	0	P57721	1	1	3	2.11	0.00014	39465.6	HOMO SAPIENS	PCBP3_HUMAN Poly(rC)-binding protein 3
5916	hIP190-13	hIP190-013	LARP7	[114]		Q14011	5	6	42.4	3.88	1.7e-07	18648.1	HOMO SAPIENS	CIRBP_HUMAN Cold-inducible RNA-binding protein
5917	hIP190-13	hIP190-013	LARP7	[115]		P51398	5	6	18.1	3.45	3.8e-06	45566.8	HOMO SAPIENS	RT29_HUMAN 28S ribosomal protein S29, mitochondrial
5918	hIP190-13	hIP190-013	LARP7	[116]		P05455	5	6	13.5	3.59	3e-07	46837.4	HOMO SAPIENS	LA_HUMAN Lupus La protein
5919	hIP190-13	hIP190-013	LARP7	[117]		P31943	4	4	13.4	3.87	7.7e-07	49229.9	HOMO SAPIENS	HNRH1_HUMAN Heterogeneous nuclear ribonucleoprotein H
5920	hIP190-13	hIP190-013	LARP7	[117-1]	0	P55795	3	3	9.6	3.87	7.7e-07	49264	HOMO SAPIENS	HNRH2_HUMAN Heterogeneous nuclear ribonucleoprotein H2
5921	hIP190-13	hIP190-013	LARP7	[117-2]	1	P52597	3	3	9.9	2.66	2.5e-06	45672.3	HOMO SAPIENS	HNRPF_HUMAN Heterogeneous nuclear ribonucleoprotein F
5922	hIP190-13	hIP190-013	LARP7	[118]		Q99714	6	6	44.8	2.91	1.2e-05	26923.3	HOMO SAPIENS	HCD2_HUMAN 3-hydroxyacyl-CoA dehydrogenase type-2
5923	hIP190-13	hIP190-013	LARP7	[119]		P61011	6	6	19.2	2.82	1.1e-05	55705.3	HOMO SAPIENS	SRP54_HUMAN Signal recognition particle 54 kDa protein
5924	hIP190-13	hIP190-013	LARP7	[120]		Q02543	5	6	22.2	3.57	1.2e-06	20762.6	HOMO SAPIENS	RL18A_HUMAN 60S ribosomal protein L18a
5925	hIP190-13	hIP190-013	LARP7	[121]		Q96RS0	5	5	11.5	3.54	2.3e-06	96620.6	HOMO SAPIENS	TGS1_HUMAN Trimethylguanosine synthase
5926	hIP190-13	hIP190-013	LARP7	[122]		P55884	5	5	11.3	3.65	1e-06	92482.4	HOMO SAPIENS	EIF3B_HUMAN Eukaryotic translation initiation factor 3 subunit B
5927	hIP190-13	hIP190-013	LARP7	[123]		P62805	5	6	43.7	3.25	9e-06	11367.4	HOMO SAPIENS	H4_HUMAN Histone H4
5928	hIP190-13	hIP190-013	LARP7	[124]		O43818	6	7	12.2	2.83	1.3e-05	51841.1	HOMO SAPIENS	U3IP2_HUMAN U3 small nucleolar RNA-interacting protein 2
5929	hIP190-13	hIP190-013	LARP7	[125]		P46776	5	6	32.4	3.27	4.2e-06	16561.5	HOMO SAPIENS	RL27A_HUMAN 60S ribosomal protein L27a
5930	hIP190-13	hIP190-013	LARP7	[126]		P05386	3	8	52.6	5.21	6.6e-09	11514	HOMO SAPIENS	RLA1_HUMAN 60S acidic ribosomal protein P1
5931	hIP190-13	hIP190-013	LARP7	[127]		P40429	5	6	25.1	3.18	9.9e-06	23577.4	HOMO SAPIENS	RL13A_HUMAN 60S ribosomal protein L13a
5932	hIP190-13	hIP190-013	LARP7	[127-1]	0	Q6NVV1	2	3	18.6	0.86	0.0019	12134.7	HOMO SAPIENS	R13AX_HUMAN Putative 60S ribosomal protein L13a-like MGC87657
5933	hIP190-13	hIP190-013	LARP7	[128]		P62266	4	6	40.6	3.86	3.4e-06	15807.7	HOMO SAPIENS	RS23_HUMAN 40S ribosomal protein S23
5934	hIP190-13	hIP190-013	LARP7	[129]		Q7Z2W4	4	4	8.4	4.26	2.3e-07	101432	HOMO SAPIENS	ZCCHV_HUMAN Zinc finger CCCH-type antiviral protein 1
5935	hIP190-13	hIP190-013	LARP7	[130]		P62917	5	8	33.5	3.25	1.3e-05	28024.9	HOMO SAPIENS	RL8_HUMAN 60S ribosomal protein L8
5936	hIP190-13	hIP190-013	LARP7	[131]		P09012	4	8	13.5	3.74	1.2e-06	31279.8	HOMO SAPIENS	SNRPA_HUMAN U1 small nuclear ribonucleoprotein A
5937	hIP190-13	hIP190-013	LARP7	[132]		Q15393	5	5	6.7	3.17	2.1e-06	135578	HOMO SAPIENS	SF3B3_HUMAN Splicing factor 3B subunit 3
5938	hIP190-13	hIP190-013	LARP7	[133]		O94992	3	3	27.6	5.24	1.6e-09	40623.8	HOMO SAPIENS	HEXI1_HUMAN Protein HEXIM1
5939	hIP190-13	hIP190-013	LARP7	[134]		O43447	4	6	42.4	3.47	4.9e-06	19208.3	HOMO SAPIENS	PPIH_HUMAN Peptidyl-prolyl cis-trans isomerase H
5940	hIP190-13	hIP190-013	LARP7	[135]		Q8WWY3	5	5	17.8	3.33	1.1e-06	55456.5	HOMO SAPIENS	PRP31_HUMAN U4/U6 small nuclear ribonucleoprotein Prp31
5941	hIP190-13	hIP190-013	LARP7	[136]		P82673	5	5	23.2	2.75	3.6e-05	36844.6	HOMO SAPIENS	RT35_HUMAN 28S ribosomal protein S35, mitochondrial
5942	hIP190-13	hIP190-013	LARP7	[137]		P35232	5	5	22.4	3	5.3e-06	29804.3	HOMO SAPIENS	PHB_HUMAN Prohibitin
5943	hIP190-13	hIP190-013	LARP7	[138]		P62847	4	6	29.3	3.47	1.9e-07	15423.3	HOMO SAPIENS	RS24_HUMAN 40S ribosomal protein S24
5944	hIP190-13	hIP190-013	LARP7	[139]		P62851	5	8	29.6	2.82	1.6e-05	13742.2	HOMO SAPIENS	RS25_HUMAN 40S ribosomal protein S25
5945	hIP190-13	hIP190-013	LARP7	[140]		Q9Y676	6	6	48.4	2.56	1.3e-05	29395.8	HOMO SAPIENS	RT18B_HUMAN 28S ribosomal protein S18b, mitochondrial
5946	hIP190-13	hIP190-013	LARP7	[141]		P35268	4	5	50.8	3.35	1.9e-06	14787.1	HOMO SAPIENS	RL22_HUMAN 60S ribosomal protein L22
5947	hIP190-13	hIP190-013	LARP7	[142]		Q99623	5	5	23.1	2.94	1e-05	33296.7	HOMO SAPIENS	PHB2_HUMAN Prohibitin-2
5948	hIP190-13	hIP190-013	LARP7	[143]		Q15233	4	4	12.5	3.78	3.5e-07	54232	HOMO SAPIENS	NONO_HUMAN Non-POU domain-containing octamer-binding protein
5949	hIP190-13	hIP190-013	LARP7	[143-1]	2	P23246	3	3	7.8	2.75	2.6e-05	76150	HOMO SAPIENS	SFPQ_HUMAN Splicing factor, proline- and glutamine-rich
5950	hIP190-13	hIP190-013	LARP7	[144]		P62899	5	9	37.6	3.34	5.2e-07	14463	HOMO SAPIENS	RL31_HUMAN 60S ribosomal protein L31
5951	hIP190-13	hIP190-013	LARP7	[145]		P46778	3	5	27.5	4.07	4.9e-07	18565	HOMO SAPIENS	RL21_HUMAN 60S ribosomal protein L21
5952	hIP190-13	hIP190-013	LARP7	[146]		Q07020	3	5	19.7	4.6	6.5e-08	21634.7	HOMO SAPIENS	RL18_HUMAN 60S ribosomal protein L18
5953	hIP190-13	hIP190-013	LARP7	[147]		Q09161	6	8	11.5	2.12	0.00013	91840.3	HOMO SAPIENS	NCBP1_HUMAN Nuclear cap-binding protein subunit 1
5954	hIP190-13	hIP190-013	LARP7	[148]		P32969	4	5	26	3.45	1.6e-06	21863.6	HOMO SAPIENS	RL9_HUMAN 60S ribosomal protein L9
5955	hIP190-13	hIP190-013	LARP7	[149]		P61254	7	9	29	2.01	0.00019	17258.4	HOMO SAPIENS	RL26_HUMAN 60S ribosomal protein L26
5956	hIP190-13	hIP190-013	LARP7	[149-1]	0	Q9UNX3	6	8	22.8	2.01	0.00019	17256.4	HOMO SAPIENS	RL26L_HUMAN 60S ribosomal protein L26-like 1
5957	hIP190-13	hIP190-013	LARP7	[150]		P50750	5	5	19.1	3.24	7.4e-07	42777.9	HOMO SAPIENS	CDK9_HUMAN Cyclin-dependent kinase 9
5958	hIP190-13	hIP190-013	LARP7	[151]		P0C0S8	3	9	30	4.47	3.7e-08	14091.6	HOMO SAPIENS	H2A1_HUMAN Histone H2A type 1
5959	hIP190-13	hIP190-013	LARP7	[151-1]	0	P20671	3	9	30	4.47	3.7e-08	14107.6	HOMO SAPIENS	H2A1D_HUMAN Histone H2A type 1-D
5960	hIP190-13	hIP190-013	LARP7	[151-2]	0	Q16777	3	9	30.2	4.47	3.7e-08	13988.5	HOMO SAPIENS	H2A2C_HUMAN Histone H2A type 2-C
5961	hIP190-13	hIP190-013	LARP7	[151-3]	0	Q6FI13	3	9	30	4.47	3.7e-08	14095.6	HOMO SAPIENS	H2A2A_HUMAN Histone H2A type 2-A
5962	hIP190-13	hIP190-013	LARP7	[151-4]	0	Q96KK5	3	9	30.5	4.47	3.7e-08	13906.4	HOMO SAPIENS	H2A1H_HUMAN Histone H2A type 1-H
5963	hIP190-13	hIP190-013	LARP7	[151-5]	0	Q99878	3	9	30.5	4.47	3.7e-08	13936.4	HOMO SAPIENS	H2A1J_HUMAN Histone H2A type 1-J
5964	hIP190-13	hIP190-013	LARP7	[151-6]	0	Q9BTM1	3	9	30.2	4.47	3.7e-08	14019.5	HOMO SAPIENS	H2AJ_HUMAN Histone H2A.J
5965	hIP190-13	hIP190-013	LARP7	[151-7]	0	P04908	2	8	21.5	4.47	3.7e-08	14135.6	HOMO SAPIENS	H2A1B_HUMAN Histone H2A type 1-B/E
5966	hIP190-13	hIP190-013	LARP7	[151-8]	0	Q7L7L0	2	8	21.5	4.47	3.7e-08	14121.6	HOMO SAPIENS	H2A3_HUMAN Histone H2A type 3
5967	hIP190-13	hIP190-013	LARP7	[151-9]	0	Q93077	2	8	21.5	4.47	3.7e-08	14105.6	HOMO SAPIENS	H2A1C_HUMAN Histone H2A type 1-C
5968	hIP190-13	hIP190-013	LARP7	[152]		P63173	5	9	51.4	2.77	1.2e-05	8218	HOMO SAPIENS	RL38_HUMAN 60S ribosomal protein L38
5969	hIP190-13	hIP190-013	LARP7	[153]		P09661	5	5	22.4	2.66	5.7e-06	28415.8	HOMO SAPIENS	RU2A_HUMAN U2 small nuclear ribonucleoprotein A'
5970	hIP190-13	hIP190-013	LARP7	[154]		Q01844	3	3	8.7	4.04	5.4e-07	68478.8	HOMO SAPIENS	EWS_HUMAN RNA-binding protein EWS
5971	hIP190-13	hIP190-013	LARP7	[155]		Q13151	3	3	21.6	3.25	3e-05	30840.9	HOMO SAPIENS	ROA0_HUMAN Heterogeneous nuclear ribonucleoprotein A0
5972	hIP190-13	hIP190-013	LARP7	[156]		Q9Y2R5	4	4	51.5	3.12	5.5e-06	14502.2	HOMO SAPIENS	RT17_HUMAN 28S ribosomal protein S17, mitochondrial
5973	hIP190-13	hIP190-013	LARP7	[157]		P82921	2	2	29.9	5.37	5.3e-09	10741.7	HOMO SAPIENS	RT21_HUMAN 28S ribosomal protein S21, mitochondrial
5974	hIP190-13	hIP190-013	LARP7	[158]		P62979	4	7	31.4	3.4	1.7e-06	17965.1	HOMO SAPIENS	RS27A_HUMAN Ubiquitin-40S ribosomal protein S27a
5975	hIP190-13	hIP190-013	LARP7	[158-1]	0	P0CG47	1	1	7	0.34	0.0052	25761.8	HOMO SAPIENS	UBB_HUMAN Polyubiquitin-B
5976	hIP190-13	hIP190-013	LARP7	[158-2]	0	P0CG48	1	1	2.3	0.34	0.0052	77029.2	HOMO SAPIENS	UBC_HUMAN Polyubiquitin-C
5977	hIP190-13	hIP190-013	LARP7	[158-3]	0	P62987	1	1	12.5	0.34	0.0052	14728.5	HOMO SAPIENS	RL40_HUMAN Ubiquitin-60S ribosomal protein L40
5978	hIP190-13	hIP190-013	LARP7	[159]		Q9Y3U8	3	4	28.6	3.93	2.3e-07	12253.8	HOMO SAPIENS	RL36_HUMAN 60S ribosomal protein L36
5979	hIP190-13	hIP190-013	LARP7	[160]		P82930	5	6	35.3	2.22	6.4e-05	25650.7	HOMO SAPIENS	RT34_HUMAN 28S ribosomal protein S34, mitochondrial
5980	hIP190-13	hIP190-013	LARP7	[161]		Q9HCE1	3	4	3.8	3.34	7.3e-06	113672	HOMO SAPIENS	MOV10_HUMAN Putative helicase MOV-10
5981	hIP190-13	hIP190-013	LARP7	[162]		Q9Y2R9	5	6	24	2.15	1.3e-05	28134.3	HOMO SAPIENS	RT07_HUMAN 28S ribosomal protein S7, mitochondrial
5982	hIP190-13	hIP190-013	LARP7	[163]		P62906	4	10	24.9	2.74	3.5e-06	24831.5	HOMO SAPIENS	RL10A_HUMAN 60S ribosomal protein L10a
5983	hIP190-13	hIP190-013	LARP7	[164]		P55769	3	3	31.2	3.07	7e-05	14173.7	HOMO SAPIENS	NH2L1_HUMAN NHP2-like protein 1
5984	hIP190-13	hIP190-013	LARP7	[165]		Q86V81	4	5	22.2	2.23	0.00018	26888.1	HOMO SAPIENS	THOC4_HUMAN THO complex subunit 4
5985	hIP190-13	hIP190-013	LARP7	[166]		P62304	4	4	29.3	2.71	1.2e-05	10803.7	HOMO SAPIENS	RUXE_HUMAN Small nuclear ribonucleoprotein E
5986	hIP190-13	hIP190-013	LARP7	[167]		P62854	3	5	33.9	3.22	9.5e-06	13015.5	HOMO SAPIENS	RS26_HUMAN 40S ribosomal protein S26
5987	hIP190-13	hIP190-013	LARP7	[167-1]	0	Q5JNZ5	2	3	20.9	1.38	0.0038	13002.5	HOMO SAPIENS	RS26L_HUMAN Putative 40S ribosomal protein S26-like 1
5988	hIP190-13	hIP190-013	LARP7	[168]		Q9BUL9	3	4	24.6	2.93	1.8e-05	20632.6	HOMO SAPIENS	RPP25_HUMAN Ribonuclease P protein subunit p25
5989	hIP190-13	hIP190-013	LARP7	[169]		P46779	6	8	36.5	1.73	0.00035	15747.6	HOMO SAPIENS	RL28_HUMAN 60S ribosomal protein L28
5990	hIP190-13	hIP190-013	LARP7	[170]		Q12899	3	3	8	3.2	1.1e-06	62166.4	HOMO SAPIENS	TRI26_HUMAN Tripartite motif-containing protein 26
5991	hIP190-13	hIP190-013	LARP7	[171]		Q8NC51	2	2	6.6	4.81	3.7e-08	44965.7	HOMO SAPIENS	PAIRB_HUMAN Plasminogen activator inhibitor 1 RNA-binding protein
5992	hIP190-13	hIP190-013	LARP7	[172]		Q14152	5	5	6.1	1.58	0.00066	166571	HOMO SAPIENS	EIF3A_HUMAN Eukaryotic translation initiation factor 3 subunit A
5993	hIP190-13	hIP190-013	LARP7	[173]		Q13263	4	4	11.1	2.09	0.00025	88550.5	HOMO SAPIENS	TIF1B_HUMAN Transcription intermediary factor 1-beta
5994	hIP190-13	hIP190-013	LARP7	[174]		Q02878	5	6	19.8	1.81	0.00065	32728.2	HOMO SAPIENS	RL6_HUMAN 60S ribosomal protein L6
5995	hIP190-13	hIP190-013	LARP7	[175]		P62314	3	6	37.8	3.26	1.4e-06	13281.7	HOMO SAPIENS	SMD1_HUMAN Small nuclear ribonucleoprotein Sm D1
5996	hIP190-13	hIP190-013	LARP7	[176]		O75533	5	5	6.7	2.12	3.7e-05	145832	HOMO SAPIENS	SF3B1_HUMAN Splicing factor 3B subunit 1
5997	hIP190-13	hIP190-013	LARP7	[177]		P02538	5	6	9.8	1.75	0.00047	60045.4	HOMO SAPIENS	K2C6A_HUMAN Keratin, type II cytoskeletal 6A
5998	hIP190-13	hIP190-013	LARP7	[177-1]	0	P48668	5	6	9.8	1.75	0.00047	60025.4	HOMO SAPIENS	K2C6C_HUMAN Keratin, type II cytoskeletal 6C
5999	hIP190-13	hIP190-013	LARP7	[6-2, 177-2]	1	P04259	4	5	6.7	2.26	4.4e-05	60067.4	HOMO SAPIENS	K2C6B_HUMAN Keratin, type II cytoskeletal 6B
6000	hIP190-13	hIP190-013	LARP7	[6-3, 177-3]	1	Q7Z794	2	3	3.3	3.61	4.8e-06	61901.9	HOMO SAPIENS	K2C1B_HUMAN Keratin, type II cytoskeletal 1b
6001	hIP190-13	hIP190-013	LARP7	[177-4]	2	P13647	4	5	6.6	1.66	0.00083	62378.9	HOMO SAPIENS	K2C5_HUMAN Keratin, type II cytoskeletal 5
6002	hIP190-13	hIP190-013	LARP7	[6-4, 177-5]	2	P19013	4	4	7.3	1.73	0.00047	57285.7	HOMO SAPIENS	K2C4_HUMAN Keratin, type II cytoskeletal 4
6003	hIP190-13	hIP190-013	LARP7	[177-6]	0	O95678	3	4	5.3	1.58	0.0013	59560.9	HOMO SAPIENS	K2C75_HUMAN Keratin, type II cytoskeletal 75
6004	hIP190-13	hIP190-013	LARP7	[177-7]	0	Q01546	2	2	2.5	1.73	0.00047	65841.3	HOMO SAPIENS	K22O_HUMAN Keratin, type II cytoskeletal 2 oral
6005	hIP190-13	hIP190-013	LARP7	[177-8]	0	Q5XKE5	2	3	3.6	1.43	0.0033	57836.1	HOMO SAPIENS	K2C79_HUMAN Keratin, type II cytoskeletal 79
6006	hIP190-13	hIP190-013	LARP7	[177-9]	2	Q86Y46	3	3	5.2	0.94	0.0044	58923.8	HOMO SAPIENS	K2C73_HUMAN Keratin, type II cytoskeletal 73
6007	hIP190-13	hIP190-013	LARP7	[178]		P28799	2	3	8.3	3.99	4.5e-07	63545.3	HOMO SAPIENS	GRN_HUMAN Granulins
6008	hIP190-13	hIP190-013	LARP7	[179]		Q9Y3D9	3	3	16.8	2.48	3e-05	21770.8	HOMO SAPIENS	RT23_HUMAN 28S ribosomal protein S23, mitochondrial
6009	hIP190-13	hIP190-013	LARP7	[180]		Q99729	2	2	6.9	3.3	1.4e-06	36225.2	HOMO SAPIENS	ROAA_HUMAN Heterogeneous nuclear ribonucleoprotein A/B
6010	hIP190-13	hIP190-013	LARP7	[180-1]	1	Q14103	2	2	6.8	2.66	2.2e-06	38434.5	HOMO SAPIENS	HNRPD_HUMAN Heterogeneous nuclear ribonucleoprotein D0
6011	hIP190-13	hIP190-013	LARP7	[180-2]	0	O14979	1	1	2.4	2.66	2.2e-06	46437.9	HOMO SAPIENS	HNRDL_HUMAN Heterogeneous nuclear ribonucleoprotein D-like
6012	hIP190-13	hIP190-013	LARP7	[181]		P40939	5	5	13	1.67	0.00019	83000.4	HOMO SAPIENS	ECHA_HUMAN Trifunctional enzyme subunit alpha, mitochondrial
6013	hIP190-13	hIP190-013	LARP7	[182]		P42766	3	8	18.7	2.38	6.8e-05	14551.6	HOMO SAPIENS	RL35_HUMAN 60S ribosomal protein L35
6014	hIP190-13	hIP190-013	LARP7	[183]		P62910	2	2	21.5	4.38	6.6e-09	15859.9	HOMO SAPIENS	RL32_HUMAN 60S ribosomal protein L32
6015	hIP190-13	hIP190-013	LARP7	[184]		P60660	3	3	25.8	2.49	2.3e-05	16930.2	HOMO SAPIENS	MYL6_HUMAN Myosin light polypeptide 6
6016	hIP190-13	hIP190-013	LARP7	[184-1]	0	P14649	2	2	11.5	2.49	2.3e-05	22764.2	HOMO SAPIENS	MYL6B_HUMAN Myosin light chain 6B
6017	hIP190-13	hIP190-013	LARP7	[185]		Q92522	4	4	27.2	2.24	1.9e-05	22487.3	HOMO SAPIENS	H1X_HUMAN Histone H1x
6018	hIP190-13	hIP190-013	LARP7	[186]		P05141	2	2	7.4	3.12	2.6e-06	32852.5	HOMO SAPIENS	ADT2_HUMAN ADP/ATP translocase 2
6019	hIP190-13	hIP190-013	LARP7	[186-1]	0	P12235	1	1	4	3.12	2.6e-06	33064.8	HOMO SAPIENS	ADT1_HUMAN ADP/ATP translocase 1
6020	hIP190-13	hIP190-013	LARP7	[186-2]	0	P12236	1	1	4	3.12	2.6e-06	32866.6	HOMO SAPIENS	ADT3_HUMAN ADP/ATP translocase 3
6021	hIP190-13	hIP190-013	LARP7	[186-3]	0	Q9H0C2	1	1	3.8	3.12	2.6e-06	35022.2	HOMO SAPIENS	ADT4_HUMAN ADP/ATP translocase 4
6022	hIP190-13	hIP190-013	LARP7	[187]		P18621	4	6	26.6	1.98	0.00024	21397.2	HOMO SAPIENS	RL17_HUMAN 60S ribosomal protein L17
6023	hIP190-13	hIP190-013	LARP7	[188]		P82912	2	2	22.7	3.76	5.1e-07	20615.9	HOMO SAPIENS	RT11_HUMAN 28S ribosomal protein S11, mitochondrial
6024	hIP190-13	hIP190-013	LARP7	[189]		P83731	3	6	21.7	2.88	2.8e-06	17779.1	HOMO SAPIENS	RL24_HUMAN 60S ribosomal protein L24
6025	hIP190-13	hIP190-013	LARP7	[190]		P52815	2	2	11.1	2.99	0.00011	21348.4	HOMO SAPIENS	RM12_HUMAN 39S ribosomal protein L12, mitochondrial
6026	hIP190-13	hIP190-013	LARP7	[191]		Q7Z4Q2	3	4	11.9	2.34	0.0002	74583.4	HOMO SAPIENS	HEAT3_HUMAN HEAT repeat-containing protein 3
6027	hIP190-13	hIP190-013	LARP7	[192]		Q01105	2	2	8.3	3.21	1.7e-06	33489.1	HOMO SAPIENS	SET_HUMAN Protein SET
6028	hIP190-13	hIP190-013	LARP7	[193]		Q8ND56	3	3	13.2	2.24	0.00023	50530.2	HOMO SAPIENS	LS14A_HUMAN Protein LSM14 homolog A
6029	hIP190-13	hIP190-013	LARP7	[194]		P61353	4	6	32.4	1.67	0.00073	15797.9	HOMO SAPIENS	RL27_HUMAN 60S ribosomal protein L27
6030	hIP190-13	hIP190-013	LARP7	[195]		Q13405	2	2	16.3	2.72	6.2e-06	19198.2	HOMO SAPIENS	RM49_HUMAN 39S ribosomal protein L49, mitochondrial
6031	hIP190-13	hIP190-013	LARP7	[196]		Q9Y399	5	5	30.4	1.6	0.00012	33249.5	HOMO SAPIENS	RT02_HUMAN 28S ribosomal protein S2, mitochondrial
6032	hIP190-13	hIP190-013	LARP7	[197]		Q00577	2	2	18.3	2.97	1.1e-05	34911	HOMO SAPIENS	PURA_HUMAN Transcriptional activator protein Pur-alpha
6033	hIP190-13	hIP190-013	LARP7	[198]		P22087	3	3	19	1.92	0.0011	33784.5	HOMO SAPIENS	FBRL_HUMAN rRNA 2'-O-methyltransferase fibrillarin
6034	hIP190-13	hIP190-013	LARP7	[199]		Q9BQ67	3	3	14.6	1.94	0.00023	49419.6	HOMO SAPIENS	GRWD1_HUMAN Glutamate-rich WD repeat-containing protein 1
6035	hIP190-13	hIP190-013	LARP7	[200]		P47914	1	1	9.4	5.18	1.7e-08	17752.2	HOMO SAPIENS	RL29_HUMAN 60S ribosomal protein L29
6036	hIP190-13	hIP190-013	LARP7	[201]		Q15029	2	2	4.5	2.77	0.0011	109437	HOMO SAPIENS	U5S1_HUMAN 116 kDa U5 small nuclear ribonucleoprotein component
6037	hIP190-13	hIP190-013	LARP7	[202]		P63220	2	2	33.7	2.62	2.9e-05	9111.5	HOMO SAPIENS	RS21_HUMAN 40S ribosomal protein S21
6038	hIP190-13	hIP190-013	LARP7	[203]		P49207	4	4	28.2	1.59	0.00044	13293.1	HOMO SAPIENS	RL34_HUMAN 60S ribosomal protein L34
6039	hIP190-13	hIP190-013	LARP7	[204]		P51991	1	1	5.8	4.92	6.8e-09	39595.3	HOMO SAPIENS	ROA3_HUMAN Heterogeneous nuclear ribonucleoprotein A3
6040	hIP190-13	hIP190-013	LARP7	[205]		P12956	3	5	8.2	2.24	1.9e-05	69843.7	HOMO SAPIENS	XRCC6_HUMAN X-ray repair cross-complementing protein 6
6041	hIP190-13	hIP190-013	LARP7	[206]		P61163	4	4	16.8	1.87	0.00011	42614.1	HOMO SAPIENS	ACTZ_HUMAN Alpha-centractin
6042	hIP190-13	hIP190-013	LARP7	[207]		Q9UMS4	3	4	16.5	1.97	9.2e-05	55181.3	HOMO SAPIENS	PRP19_HUMAN Pre-mRNA-processing factor 19
6043	hIP190-13	hIP190-013	LARP7	[208]		P62306	2	2	40.7	2.62	2.4e-05	9725.3	HOMO SAPIENS	RUXF_HUMAN Small nuclear ribonucleoprotein F
6044	hIP190-13	hIP190-013	LARP7	[209]		P36873	2	2	11.5	2.5	1.1e-05	36984.1	HOMO SAPIENS	PP1G_HUMAN Serine/threonine-protein phosphatase PP1-gamma catalytic subunit
6045	hIP190-13	hIP190-013	LARP7	[209-1]	0	P62136	2	2	11.2	2.5	1.1e-05	37512.4	HOMO SAPIENS	PP1A_HUMAN Serine/threonine-protein phosphatase PP1-alpha catalytic subunit
6046	hIP190-13	hIP190-013	LARP7	[209-2]	0	P62140	2	2	11.3	2.5	1.1e-05	37187.2	HOMO SAPIENS	PP1B_HUMAN Serine/threonine-protein phosphatase PP1-beta catalytic subunit
6047	hIP190-13	hIP190-013	LARP7	[210]		P40227	4	4	12.8	1.62	0.00032	58024.7	HOMO SAPIENS	TCPZ_HUMAN T-complex protein 1 subunit zeta
6048	hIP190-13	hIP190-013	LARP7	[211]		P62333	3	3	9.3	1.68	5.7e-05	44173.4	HOMO SAPIENS	PRS10_HUMAN 26S protease regulatory subunit 10B
6049	hIP190-13	hIP190-013	LARP7	[212]		Q96GA3	2	2	6.5	2.19	1.3e-05	54855.4	HOMO SAPIENS	LTV1_HUMAN Protein LTV1 homolog
6050	hIP190-13	hIP190-013	LARP7	[213]		Q99613	3	3	4.6	1.82	0.00012	105345	HOMO SAPIENS	EIF3C_HUMAN Eukaryotic translation initiation factor 3 subunit C
6051	hIP190-13	hIP190-013	LARP7	[214]		P62273	4	6	48.2	1.25	0.0006	6676.8	HOMO SAPIENS	RS29_HUMAN 40S ribosomal protein S29
6052	hIP190-13	hIP190-013	LARP7	[215]		P41567	2	2	51.3	2.03	0.0027	12732.6	HOMO SAPIENS	EIF1_HUMAN Eukaryotic translation initiation factor 1
6053	hIP190-13	hIP190-013	LARP7	[215-1]	0	O60739	1	1	21.2	0.85	0.0035	12823.7	HOMO SAPIENS	EIF1B_HUMAN Eukaryotic translation initiation factor 1b
6054	hIP190-13	hIP190-013	LARP7	[216]		P61313	3	3	17.2	1.53	0.00041	24146.3	HOMO SAPIENS	RL15_HUMAN 60S ribosomal protein L15
6055	hIP190-13	hIP190-013	LARP7	[217]		Q9BVP2	3	3	9.1	1.71	0.00087	61993.7	HOMO SAPIENS	GNL3_HUMAN Guanine nucleotide-binding protein-like 3
6056	hIP190-13	hIP190-013	LARP7	[218]		Q7L0Y3	2	2	11.4	2.41	0.00016	47347.4	HOMO SAPIENS	MRRP1_HUMAN Mitochondrial ribonuclease P protein 1
6057	hIP190-13	hIP190-013	LARP7	[219]		Q9BY77	3	3	12.6	1.42	0.0004	46089.7	HOMO SAPIENS	PDIP3_HUMAN Polymerase delta-interacting protein 3
6058	hIP190-13	hIP190-013	LARP7	[220]		P11387	2	2	3.9	2.31	4.3e-05	90726.5	HOMO SAPIENS	TOP1_HUMAN DNA topoisomerase 1
6059	hIP190-13	hIP190-013	LARP7	[221]		Q6P161	3	3	48.6	1.48	0.00039	15819.3	HOMO SAPIENS	RM54_HUMAN 39S ribosomal protein L54, mitochondrial
6060	hIP190-13	hIP190-013	LARP7	[222]		P01614	1	2	11.3	3.72	1.2e-07	12676.4	HOMO SAPIENS	KV201_HUMAN Ig kappa chain V-II region Cum
6061	hIP190-13	hIP190-013	LARP7	[222-1]	0	P01617	1	2	11.5	3.72	1.2e-07	12317	HOMO SAPIENS	KV204_HUMAN Ig kappa chain V-II region TEW
6062	hIP190-13	hIP190-013	LARP7	[222-2]	0	P06309	1	2	11.1	3.72	1.2e-07	12664.3	HOMO SAPIENS	KV205_HUMAN Ig kappa chain V-II region GM607 (Fragment)
6063	hIP190-13	hIP190-013	LARP7	[222-3]	0	P06310	1	2	9.8	3.72	1.2e-07	14706.8	HOMO SAPIENS	KV206_HUMAN Ig kappa chain V-II region RPMI 6410
6064	hIP190-13	hIP190-013	LARP7	[223]		P14678	3	8	17.9	1.45	0.00096	24610.3	HOMO SAPIENS	RSMB_HUMAN Small nuclear ribonucleoprotein-associated proteins B and B'
6065	hIP190-13	hIP190-013	LARP7	[223-1]	0	P63162	3	8	17.9	1.45	0.00096	24614.3	HOMO SAPIENS	RSMN_HUMAN Small nuclear ribonucleoprotein-associated protein N
6066	hIP190-13	hIP190-013	LARP7	[224]		P82663	1	1	7.5	3.66	2.2e-07	20116.6	HOMO SAPIENS	RT25_HUMAN 28S ribosomal protein S25, mitochondrial
6067	hIP190-13	hIP190-013	LARP7	[225]		O43242	2	2	9.9	2.22	7.8e-05	60978.1	HOMO SAPIENS	PSMD3_HUMAN 26S proteasome non-ATPase regulatory subunit 3
6068	hIP190-13	hIP190-013	LARP7	[226]		P60866	3	5	22.7	1.33	0.0032	13372.8	HOMO SAPIENS	RS20_HUMAN 40S ribosomal protein S20
6069	hIP190-13	hIP190-013	LARP7	[227]		Q9H2U1	2	2	3.4	2.04	0.00039	114761	HOMO SAPIENS	DHX36_HUMAN Probable ATP-dependent RNA helicase DHX36
6070	hIP190-13	hIP190-013	LARP7	[228]		P83881	2	4	17.9	1.99	0.00011	12440.9	HOMO SAPIENS	RL36A_HUMAN 60S ribosomal protein L36a
6071	hIP190-13	hIP190-013	LARP7	[228-1]	0	Q969Q0	1	2	8.5	1.26	0.0045	12469	HOMO SAPIENS	RL36L_HUMAN 60S ribosomal protein L36a-like
6072	hIP190-13	hIP190-013	LARP7	[229]		Q9BYN8	3	3	15.1	1.33	0.001	24211.9	HOMO SAPIENS	RT26_HUMAN 28S ribosomal protein S26, mitochondrial
6073	hIP190-13	hIP190-013	LARP7	[230]		P84090	1	1	11.5	3.28	1.8e-07	12259.1	HOMO SAPIENS	ERH_HUMAN Enhancer of rudimentary homolog
6074	hIP190-13	hIP190-013	LARP7	[231]		O95793	1	1	2.4	3.27	2.1e-06	63182.8	HOMO SAPIENS	STAU1_HUMAN Double-stranded RNA-binding protein Staufen homolog 1
6075	hIP190-13	hIP190-013	LARP7	[232]		Q8N163	2	2	3.3	1.79	0.0013	102902	HOMO SAPIENS	K1967_HUMAN Protein KIAA1967
6076	hIP190-13	hIP190-013	LARP7	[233]		P61513	1	1	19.6	3.16	3.1e-06	10275.4	HOMO SAPIENS	RL37A_HUMAN 60S ribosomal protein L37a
6077	hIP190-13	hIP190-013	LARP7	[234]		O00303	1	1	4.8	3.15	1.4e-06	37564.2	HOMO SAPIENS	EIF3F_HUMAN Eukaryotic translation initiation factor 3 subunit F
6078	hIP190-13	hIP190-013	LARP7	[235]		Q16540	2	2	24.2	1.79	0.00033	17781.3	HOMO SAPIENS	RM23_HUMAN 39S ribosomal protein L23, mitochondrial
6079	hIP190-13	hIP190-013	LARP7	[236]		O00411	2	2	4.4	2.06	7.1e-05	138622	HOMO SAPIENS	RPOM_HUMAN DNA-directed RNA polymerase, mitochondrial
6080	hIP190-13	hIP190-013	LARP7	[237]		O60783	1	1	11.7	3.07	1.1e-05	15138.9	HOMO SAPIENS	RT14_HUMAN 28S ribosomal protein S14, mitochondrial
6081	hIP190-13	hIP190-013	LARP7	[238]		Q9Y2Q9	2	3	10.7	1.61	0.00033	20843	HOMO SAPIENS	RT28_HUMAN 28S ribosomal protein S28, mitochondrial
6082	hIP190-13	hIP190-013	LARP7	[239]		Q14197	2	2	15.5	1.64	0.00016	23630.3	HOMO SAPIENS	ICT1_HUMAN Peptidyl-tRNA hydrolase ICT1, mitochondrial
6083	hIP190-13	hIP190-013	LARP7	[240]		A8MWD9	2	2	26.3	1.84	0.00014	8544.1	HOMO SAPIENS	RUXGL_HUMAN Small nuclear ribonucleoprotein G-like protein
6084	hIP190-13	hIP190-013	LARP7	[240-1]	0	P62308	2	2	26.3	1.84	0.00014	8496.2	HOMO SAPIENS	RUXG_HUMAN Small nuclear ribonucleoprotein G
6085	hIP190-13	hIP190-013	LARP7	[241]		Q9BRJ6	2	2	29.4	1.56	0.0026	22083.5	HOMO SAPIENS	CG050_HUMAN Uncharacterized protein C7orf50
6086	hIP190-13	hIP190-013	LARP7	[242]		Q9H6S0	3	3	3.8	1.23	0.001	160250	HOMO SAPIENS	YTDC2_HUMAN Probable ATP-dependent RNA helicase YTHDC2
6087	hIP190-13	hIP190-013	LARP7	[243]		P49790	1	1	0.9	2.75	2.9e-06	153940	HOMO SAPIENS	NU153_HUMAN Nuclear pore complex protein Nup153
6088	hIP190-13	hIP190-013	LARP7	[244]		P43686	3	3	17.2	1.05	0.0019	47366.7	HOMO SAPIENS	PRS6B_HUMAN 26S protease regulatory subunit 6B
6089	hIP190-13	hIP190-013	LARP7	[245]		Q13561	2	2	13.2	1.43	0.0025	44231.4	HOMO SAPIENS	DCTN2_HUMAN Dynactin subunit 2
6090	hIP190-13	hIP190-013	LARP7	[246]		P26196	1	1	5	2.54	6.7e-05	54417.3	HOMO SAPIENS	DDX6_HUMAN Probable ATP-dependent RNA helicase DDX6
6091	hIP190-13	hIP190-013	LARP7	[247]		Q15717	1	1	3.4	2.53	0.00012	36092.2	HOMO SAPIENS	ELAV1_HUMAN ELAV-like protein 1
6092	hIP190-13	hIP190-013	LARP7	[248]		P23284	1	2	6	2.45	3.8e-05	23742.7	HOMO SAPIENS	PPIB_HUMAN Peptidyl-prolyl cis-trans isomerase B
6093	hIP190-13	hIP190-013	LARP7	[249]		Q86U42	1	2	17.3	2.43	0.00038	32749.3	HOMO SAPIENS	PABP2_HUMAN Polyadenylate-binding protein 2
6094	hIP190-13	hIP190-013	LARP7	[250]		Q9H3K6	2	2	29.1	1.27	0.0051	10116.6	HOMO SAPIENS	BOLA2_HUMAN BolA-like protein 2
6095	hIP190-13	hIP190-013	LARP7	[251]		P24534	1	1	6.7	2.39	8.1e-06	24763.9	HOMO SAPIENS	EF1B_HUMAN Elongation factor 1-beta
6096	hIP190-13	hIP190-013	LARP7	[252]		Q9UNM6	2	2	8.5	1.48	0.00082	42945.9	HOMO SAPIENS	PSD13_HUMAN 26S proteasome non-ATPase regulatory subunit 13
6097	hIP190-13	hIP190-013	LARP7	[253]		P62633	2	2	13	1.69	6.4e-05	19462.9	HOMO SAPIENS	CNBP_HUMAN Cellular nucleic acid-binding protein
6098	hIP190-13	hIP190-013	LARP7	[254]		Q9Y3Y2	1	1	5.2	2.17	0.00017	26396.8	HOMO SAPIENS	CHTOP_HUMAN Chromatin target of PRMT1 protein
6099	hIP190-13	hIP190-013	LARP7	[255]		P62995	1	1	5.6	2.16	9.6e-06	33665.9	HOMO SAPIENS	TRA2B_HUMAN Transformer-2 protein homolog beta
6100	hIP190-13	hIP190-013	LARP7	[256]		O00231	2	2	4.5	1.18	0.0015	47464.2	HOMO SAPIENS	PSD11_HUMAN 26S proteasome non-ATPase regulatory subunit 11
6101	hIP190-13	hIP190-013	LARP7	[257]		Q9H2W6	2	2	13.3	1.12	0.0014	31705.4	HOMO SAPIENS	RM46_HUMAN 39S ribosomal protein L46, mitochondrial
6102	hIP190-13	hIP190-013	LARP7	[258]		O75821	1	1	10	2.12	0.00072	35611.3	HOMO SAPIENS	EIF3G_HUMAN Eukaryotic translation initiation factor 3 subunit G
6103	hIP190-13	hIP190-013	LARP7	[259]		decoy	2	2	2.8	1.09	0.0013	93611.4	HOMO SAPIENS	DISC1_HUMAN Disrupted in schizophrenia 1 protein
6104	hIP190-13	hIP190-013	LARP7	[260]		P62714	2	2	12.6	1.24	0.00049	35575.4	HOMO SAPIENS	PP2AB_HUMAN Serine/threonine-protein phosphatase 2A catalytic subunit beta isoform
6105	hIP190-13	hIP190-013	LARP7	[260-1]	0	P67775	2	2	12.6	1.24	0.00049	35594.5	HOMO SAPIENS	PP2AA_HUMAN Serine/threonine-protein phosphatase 2A catalytic subunit alpha isoform
6106	hIP190-13	hIP190-013	LARP7	[261]		P62191	1	1	4.8	2.08	0.00024	49184.9	HOMO SAPIENS	PRS4_HUMAN 26S protease regulatory subunit 4
6107	hIP190-13	hIP190-013	LARP7	[262]		P60900	2	2	12.2	1.37	0.0004	27399.7	HOMO SAPIENS	PSA6_HUMAN Proteasome subunit alpha type-6
6108	hIP190-13	hIP190-013	LARP7	[263]		Q9NXG2	1	1	4.2	2.07	5.5e-05	39315.7	HOMO SAPIENS	THUM1_HUMAN THUMP domain-containing protein 1
6109	hIP190-13	hIP190-013	LARP7	[264]		P09211	2	2	17.1	1.25	0.0015	23356	HOMO SAPIENS	GSTP1_HUMAN Glutathione S-transferase P
6110	hIP190-13	hIP190-013	LARP7	[265]		Q9GZS3	1	1	9.5	2	9.9e-05	33580.8	HOMO SAPIENS	WDR61_HUMAN WD repeat-containing protein 61
6111	hIP190-13	hIP190-013	LARP7	[266]		O95218	3	3	8.2	0.85	0.0023	37404.7	HOMO SAPIENS	ZRAB2_HUMAN Zinc finger Ran-binding domain-containing protein 2
6112	hIP190-13	hIP190-013	LARP7	[267]		P14618	1	1	2.4	1.99	0.00022	57937.4	HOMO SAPIENS	KPYM_HUMAN Pyruvate kinase isozymes M1/M2
6113	hIP190-13	hIP190-013	LARP7	[268]		P30048	1	2	12.1	1.95	0.0018	27692.9	HOMO SAPIENS	PRDX3_HUMAN Thioredoxin-dependent peroxide reductase, mitochondrial
6114	hIP190-13	hIP190-013	LARP7	[269]		Q86W50	1	1	4.8	1.94	0.0032	63621.6	HOMO SAPIENS	MET16_HUMAN Methyltransferase-like protein 16
6115	hIP190-13	hIP190-013	LARP7	[270]		O75817	2	2	24.3	1.11	0.0021	15651	HOMO SAPIENS	POP7_HUMAN Ribonuclease P protein subunit p20
6116	hIP190-13	hIP190-013	LARP7	[271]		O15355	2	2	4	0.96	0.00081	59272.1	HOMO SAPIENS	PPM1G_HUMAN Protein phosphatase 1G
6117	hIP190-13	hIP190-013	LARP7	[272]		P22061	1	1	15	1.85	0.0037	24636.6	HOMO SAPIENS	PIMT_HUMAN Protein-L-isoaspartate(D-aspartate) O-methyltransferase
6118	hIP190-13	hIP190-013	LARP7	[273]		P23528	1	1	7.8	1.82	0.00063	18502.7	HOMO SAPIENS	COF1_HUMAN Cofilin-1
6119	hIP190-13	hIP190-013	LARP7	[274]		P55036	2	2	7.2	1.34	0.00013	40737	HOMO SAPIENS	PSMD4_HUMAN 26S proteasome non-ATPase regulatory subunit 4
6120	hIP190-13	hIP190-013	LARP7	[275]		Q9NY12	1	1	8.3	1.77	0.00029	22348.1	HOMO SAPIENS	GAR1_HUMAN H/ACA ribonucleoprotein complex subunit 1
6121	hIP190-13	hIP190-013	LARP7	[276]		Q9Y6H1	1	1	15.2	1.76	0.00032	15512.7	HOMO SAPIENS	CHCH2_HUMAN Coiled-coil-helix-coiled-coil-helix domain-containing protein 2, mitochondrial
6122	hIP190-13	hIP190-013	LARP7	[277]		Q00059	1	1	4.1	1.74	3e-05	29096.9	HOMO SAPIENS	TFAM_HUMAN Transcription factor A, mitochondrial
6123	hIP190-13	hIP190-013	LARP7	[278]		O00567	2	2	4.7	0.98	0.0014	66050.5	HOMO SAPIENS	NOP56_HUMAN Nucleolar protein 56
6124	hIP190-13	hIP190-013	LARP7	[279]		Q92769	1	1	3.9	1.71	0.0017	55364.7	HOMO SAPIENS	HDAC2_HUMAN Histone deacetylase 2
6125	hIP190-13	hIP190-013	LARP7	[280]		O15226	2	2	4.9	0.98	0.003	77673.6	HOMO SAPIENS	NKRF_HUMAN NF-kappa-B-repressing factor
6126	hIP190-13	hIP190-013	LARP7	[281]		O14950	1	1	11.6	1.65	0.00018	19779.3	HOMO SAPIENS	ML12B_HUMAN Myosin regulatory light chain 12B
6127	hIP190-13	hIP190-013	LARP7	[281-1]	0	P19105	1	1	11.7	1.65	0.00018	19794.3	HOMO SAPIENS	ML12A_HUMAN Myosin regulatory light chain 12A
6128	hIP190-13	hIP190-013	LARP7	[282]		Q9NP92	1	1	7.3	1.64	0.00029	50365.2	HOMO SAPIENS	RT30_HUMAN 28S ribosomal protein S30, mitochondrial
6129	hIP190-13	hIP190-013	LARP7	[283]		P55209	1	1	4.3	1.61	0.00016	45374.5	HOMO SAPIENS	NP1L1_HUMAN Nucleosome assembly protein 1-like 1
6130	hIP190-13	hIP190-013	LARP7	[284]		O75964	1	1	10.7	1.58	0.00016	11428.6	HOMO SAPIENS	ATP5L_HUMAN ATP synthase subunit g, mitochondrial
6131	hIP190-13	hIP190-013	LARP7	[285]		P12277	1	1	8.4	1.57	0.0024	42644.7	HOMO SAPIENS	KCRB_HUMAN Creatine kinase B-type
6132	hIP190-13	hIP190-013	LARP7	[286]		O14818	1	1	4.4	1.57	0.00027	27887.1	HOMO SAPIENS	PSA7_HUMAN Proteasome subunit alpha type-7
6133	hIP190-13	hIP190-013	LARP7	[286-1]	0	Q8TAA3	1	1	4.3	1.57	0.00027	28530	HOMO SAPIENS	PSA7L_HUMAN Proteasome subunit alpha type-7-like
6134	hIP190-13	hIP190-013	LARP7	[287]		Q09028	1	1	3.5	1.55	6.6e-05	47656.1	HOMO SAPIENS	RBBP4_HUMAN Histone-binding protein RBBP4
6135	hIP190-13	hIP190-013	LARP7	[288]		Q00610	2	2	1.4	0.93	0.0011	191616	HOMO SAPIENS	CLH1_HUMAN Clathrin heavy chain 1
6136	hIP190-13	hIP190-013	LARP7	[289]		Q13765	1	1	7	1.5	0.00011	23384.1	HOMO SAPIENS	NACA_HUMAN Nascent polypeptide-associated complex subunit alpha
6137	hIP190-13	hIP190-013	LARP7	[290]		Q14684	1	1	4.4	1.48	0.0063	84428.2	HOMO SAPIENS	RRP1B_HUMAN Ribosomal RNA processing protein 1 homolog B
6138	hIP190-13	hIP190-013	LARP7	[291]		Q9UHD8	1	1	6.1	1.43	0.0081	65402	HOMO SAPIENS	SEPT9_HUMAN Septin-9
6139	hIP190-13	hIP190-013	LARP7	[292]		Q5SSJ5	1	1	2.5	1.4	0.00026	61207.5	HOMO SAPIENS	HP1B3_HUMAN Heterochromatin protein 1-binding protein 3
6140	hIP190-13	hIP190-013	LARP7	[293]		P07814	3	3	3.9	0.62	0.0029	170592	HOMO SAPIENS	SYEP_HUMAN Bifunctional glutamate/proline--tRNA ligase
6141	hIP190-13	hIP190-013	LARP7	[294]		P61978	1	1	7.3	1.35	0.00057	50976.7	HOMO SAPIENS	HNRPK_HUMAN Heterogeneous nuclear ribonucleoprotein K
6142	hIP190-13	hIP190-013	LARP7	[295]		Q9BYD3	1	1	8	1.35	0.0007	34919.5	HOMO SAPIENS	RM04_HUMAN 39S ribosomal protein L4, mitochondrial
6143	hIP190-13	hIP190-013	LARP7	[296]		Q9BQA1	1	1	4.4	1.35	0.00041	36724.7	HOMO SAPIENS	MEP50_HUMAN Methylosome protein 50
6144	hIP190-13	hIP190-013	LARP7	[297]		P52907	1	1	6.3	1.27	0.002	32923	HOMO SAPIENS	CAZA1_HUMAN F-actin-capping protein subunit alpha-1
6145	hIP190-13	hIP190-013	LARP7	[298]		Q6P1J9	1	1	2.1	1.24	0.00014	60577.1	HOMO SAPIENS	CDC73_HUMAN Parafibromin
6146	hIP190-13	hIP190-013	LARP7	[299]		P34932	1	1	1.3	1.23	0.0002	94331.8	HOMO SAPIENS	HSP74_HUMAN Heat shock 70 kDa protein 4
6147	hIP190-13	hIP190-013	LARP7	[300]		Q9H0A0	1	1	1.5	1.2	0.0036	115731	HOMO SAPIENS	NAT10_HUMAN N-acetyltransferase 10
6148	hIP190-13	hIP190-013	LARP7	[301]		P18077	1	1	8.2	1.18	0.0005	12537.8	HOMO SAPIENS	RL35A_HUMAN 60S ribosomal protein L35a
6149	hIP190-13	hIP190-013	LARP7	[302]		P82675	1	1	3.3	1.18	0.00041	48006.9	HOMO SAPIENS	RT05_HUMAN 28S ribosomal protein S5, mitochondrial
6150	hIP190-13	hIP190-013	LARP7	[303]		Q13595	1	1	5	1.15	0.00094	32688.9	HOMO SAPIENS	TRA2A_HUMAN Transformer-2 protein homolog alpha
6151	hIP190-13	hIP190-013	LARP7	[304]		P27708	1	1	1.2	1.15	0.0046	242986	HOMO SAPIENS	PYR1_HUMAN CAD protein
6152	hIP190-13	hIP190-013	LARP7	[305]		Q9Y237	1	1	22.9	1.14	0.0024	13810.1	HOMO SAPIENS	PIN4_HUMAN Peptidyl-prolyl cis-trans isomerase NIMA-interacting 4
6153	hIP190-13	hIP190-013	LARP7	[306]		P62310	1	1	11.8	1.11	0.0048	11845.5	HOMO SAPIENS	LSM3_HUMAN U6 snRNA-associated Sm-like protein LSm3
6154	hIP190-13	hIP190-013	LARP7	[307]		Q6ZN17	1	1	5.6	1.11	0.00085	27083.9	HOMO SAPIENS	LN28B_HUMAN Protein lin-28 homolog B
6155	hIP190-13	hIP190-013	LARP7	[308]		Q8WXX5	1	1	10.4	1.1	0.0014	29910	HOMO SAPIENS	DNJC9_HUMAN DnaJ homolog subfamily C member 9
6156	hIP190-13	hIP190-013	LARP7	[309]		P28072	2	3	8.8	0.86	0.001	25358	HOMO SAPIENS	PSB6_HUMAN Proteasome subunit beta type-6
6157	hIP190-13	hIP190-013	LARP7	[310]		Q92598	1	1	1.3	1.08	0.00032	96865.8	HOMO SAPIENS	HS105_HUMAN Heat shock protein 105 kDa
6158	hIP190-13	hIP190-013	LARP7	[311]		Q9UHX1	1	1	3.9	1.08	0.0027	59876	HOMO SAPIENS	PUF60_HUMAN Poly(U)-binding-splicing factor PUF60
6159	hIP190-13	hIP190-013	LARP7	[312]		P63208	1	1	17.8	1.06	0.0016	18658.2	HOMO SAPIENS	SKP1_HUMAN S-phase kinase-associated protein 1
6160	hIP190-13	hIP190-013	LARP7	[313]		Q9BRJ2	1	1	9.2	1.06	0.0031	35351.2	HOMO SAPIENS	RM45_HUMAN 39S ribosomal protein L45, mitochondrial
6161	hIP190-13	hIP190-013	LARP7	[314]		P63167	1	1	24.7	1.06	0.0055	10366	HOMO SAPIENS	DYL1_HUMAN Dynein light chain 1, cytoplasmic
6162	hIP190-13	hIP190-013	LARP7	[315]		Q96DG6	1	1	6.1	1.05	0.0036	28048.4	HOMO SAPIENS	CMBL_HUMAN Carboxymethylenebutenolidase homolog
6163	hIP190-13	hIP190-013	LARP7	[316]		O14602	1	1	11.1	1.04	0.0024	16442.5	HOMO SAPIENS	IF1AY_HUMAN Eukaryotic translation initiation factor 1A, Y-chromosomal
6164	hIP190-13	hIP190-013	LARP7	[316-1]	0	P47813	1	1	11.1	1.04	0.0024	16460.5	HOMO SAPIENS	IF1AX_HUMAN Eukaryotic translation initiation factor 1A, X-chromosomal
6165	hIP190-13	hIP190-013	LARP7	[317]		O43324	1	1	6.9	1.03	0.0061	19810.7	HOMO SAPIENS	MCA3_HUMAN Eukaryotic translation elongation factor 1 epsilon-1
6166	hIP190-13	hIP190-013	LARP7	[318]		Q9H0D6	2	2	4.2	0.83	0.00082	108583	HOMO SAPIENS	XRN2_HUMAN 5'-3' exoribonuclease 2
6167	hIP190-13	hIP190-013	LARP7	[319]		P38159	1	1	3.3	1.02	0.00053	42332.2	HOMO SAPIENS	RBMX_HUMAN RNA-binding motif protein, X chromosome
6168	hIP190-13	hIP190-013	LARP7	[319-1]	0	Q96E39	1	1	3.3	1.02	0.00053	42141.9	HOMO SAPIENS	RMXL1_HUMAN RNA binding motif protein, X-linked-like-1
6169	hIP190-13	hIP190-013	LARP7	[320]		P47756	1	1	7.2	1.01	0.0017	31350.8	HOMO SAPIENS	CAPZB_HUMAN F-actin-capping protein subunit beta
6170	hIP190-13	hIP190-013	LARP7	[321]		P41252	1	1	2	1	0.0038	144499	HOMO SAPIENS	SYIC_HUMAN Isoleucine--tRNA ligase, cytoplasmic
6171	hIP190-13	hIP190-013	LARP7	[322]		P53621	1	1	1.3	0.99	0.00034	138347	HOMO SAPIENS	COPA_HUMAN Coatomer subunit alpha
6172	hIP190-13	hIP190-013	LARP7	[323]		P78346	2	2	14.2	0.53	0.0079	29321.5	HOMO SAPIENS	RPP30_HUMAN Ribonuclease P protein subunit p30
6173	hIP190-13	hIP190-013	LARP7	[324]		Q8N5P1	1	1	8.2	0.88	0.0058	33576.1	HOMO SAPIENS	ZC3H8_HUMAN Zinc finger CCCH domain-containing protein 8
6174	hIP190-13	hIP190-013	LARP7	[325]		Q9Y3D5	1	1	13.4	0.88	0.0013	15849.9	HOMO SAPIENS	RT18C_HUMAN 28S ribosomal protein S18c, mitochondrial
6175	hIP190-13	hIP190-013	LARP7	[326]		Q96BP2	1	1	9.3	0.87	0.00076	13474.9	HOMO SAPIENS	CHCH1_HUMAN Coiled-coil-helix-coiled-coil-helix domain-containing protein 1
6176	hIP190-13	hIP190-013	LARP7	[327]		Q14203	2	2	2.9	0.73	0.00096	141696	HOMO SAPIENS	DCTN1_HUMAN Dynactin subunit 1
6177	hIP190-13	hIP190-013	LARP7	[328]		Q14683	1	1	1	0.84	0.00035	143234	HOMO SAPIENS	SMC1A_HUMAN Structural maintenance of chromosomes protein 1A
6178	hIP190-13	hIP190-013	LARP7	[329]		P06733	2	2	7.4	0.48	0.0037	47169.4	HOMO SAPIENS	ENOA_HUMAN Alpha-enolase
6179	hIP190-13	hIP190-013	LARP7	[329-1]	0	P13929	1	1	3.5	0.48	0.0037	46932.2	HOMO SAPIENS	ENOB_HUMAN Beta-enolase
6180	hIP190-13	hIP190-013	LARP7	[330]		Q8TEM1	1	1	1.3	0.82	0.0031	205113	HOMO SAPIENS	PO210_HUMAN Nuclear pore membrane glycoprotein 210
6181	hIP190-13	hIP190-013	LARP7	[331]		Q9H7E9	1	1	10.5	0.81	0.0036	24992.7	HOMO SAPIENS	CH033_HUMAN UPF0488 protein C8orf33
6182	hIP190-13	hIP190-013	LARP7	[332]		P14174	1	1	10.4	0.8	0.0036	12476.4	HOMO SAPIENS	MIF_HUMAN Macrophage migration inhibitory factor
6183	hIP190-13	hIP190-013	LARP7	[333]		P98179	1	1	11.5	0.79	0.0086	17170.5	HOMO SAPIENS	RBM3_HUMAN Putative RNA-binding protein 3
6184	hIP190-13	hIP190-013	LARP7	[334]		Q9H814	1	1	2	0.75	0.0027	44402.9	HOMO SAPIENS	PHAX_HUMAN Phosphorylated adapter RNA export protein
6185	hIP190-13	hIP190-013	LARP7	[335]		P82914	2	2	8.2	0.48	0.0093	29842.4	HOMO SAPIENS	RT15_HUMAN 28S ribosomal protein S15, mitochondrial
6186	hIP190-13	hIP190-013	LARP7	[336]		Q9UJV9	1	1	2.1	0.74	0.0012	69838.3	HOMO SAPIENS	DDX41_HUMAN Probable ATP-dependent RNA helicase DDX41
6187	hIP190-13	hIP190-013	LARP7	[337]		Q9Y2T2	1	1	5.5	0.72	0.004	46939.6	HOMO SAPIENS	AP3M1_HUMAN AP-3 complex subunit mu-1
6188	hIP190-13	hIP190-013	LARP7	[338]		Q4VCS5	2	2	3	0.55	0.0049	118086	HOMO SAPIENS	AMOT_HUMAN Angiomotin
6189	hIP190-13	hIP190-013	LARP7	[339]		P17980	1	1	3.6	0.68	0.00099	49204	HOMO SAPIENS	PRS6A_HUMAN 26S protease regulatory subunit 6A
6190	hIP190-13	hIP190-013	LARP7	[340]		Q9BWJ5	1	1	17.4	0.66	0.0056	10135.5	HOMO SAPIENS	SF3B5_HUMAN Splicing factor 3B subunit 5
6191	hIP190-13	hIP190-013	LARP7	[341]		P28070	1	1	8.3	0.65	0.0068	29204.5	HOMO SAPIENS	PSB4_HUMAN Proteasome subunit beta type-4
6192	hIP190-13	hIP190-013	LARP7	[342]		P48556	1	1	8.9	0.63	0.0049	39612.2	HOMO SAPIENS	PSMD8_HUMAN 26S proteasome non-ATPase regulatory subunit 8
6193	hIP190-13	hIP190-013	LARP7	[343]		Q9NWU5	1	1	5.8	0.62	0.00092	23640.9	HOMO SAPIENS	RM22_HUMAN 39S ribosomal protein L22, mitochondrial
6194	hIP190-13	hIP190-013	LARP7	[344]		O94776	1	1	2.4	0.62	0.0083	75023.8	HOMO SAPIENS	MTA2_HUMAN Metastasis-associated protein MTA2
6195	hIP190-13	hIP190-013	LARP7	[345]		Q68DE3	1	1	0.8	0.62	0.0024	241683	HOMO SAPIENS	K2018_HUMAN Basic helix-loop-helix domain-containing protein KIAA2018
6196	hIP190-13	hIP190-013	LARP7	[346]		decoy	1	1	2.2	0.57	0.0072	77009.8	HOMO SAPIENS	EPB42_HUMAN Erythrocyte membrane protein band 4.2
6197	hIP190-13	hIP190-013	LARP7	[347]		P08579	1	1	4.4	0.57	0.0092	25486.6	HOMO SAPIENS	RU2B_HUMAN U2 small nuclear ribonucleoprotein B''
6198	hIP190-13	hIP190-013	LARP7	[348]		Q15021	1	1	2.1	0.55	0.008	157184	HOMO SAPIENS	CND1_HUMAN Condensin complex subunit 1
6199	hIP190-13	hIP190-013	LARP7	[349]		P04080	1	1	12.2	0.54	0.0066	11139.7	HOMO SAPIENS	CYTB_HUMAN Cystatin-B
6200	hIP190-13	hIP190-013	LARP7	[350]		decoy	1	1	2.9	0.54	0.0039	46261.5	HOMO SAPIENS	DPS1_HUMAN Decaprenyl-diphosphate synthase subunit 1
6201	hIP190-13	hIP190-013	LARP7	[351]		P35573	1	1	1.4	0.52	0.0052	174765	HOMO SAPIENS	GDE_HUMAN Glycogen debranching enzyme
6202	hIP190-13	hIP190-013	LARP7	[352]		Q14331	1	1	5	0.5	0.0076	29172.6	HOMO SAPIENS	FRG1_HUMAN Protein FRG1
6203	hIP190-13	hIP190-013	LARP7	[353]		Q9Y3B7	1	1	6.2	0.5	0.0055	20683.4	HOMO SAPIENS	RM11_HUMAN 39S ribosomal protein L11, mitochondrial
6204	hIP190-13	hIP190-013	LARP7	[354]		P62891	1	1	19.6	0.49	0.0028	6406.7	HOMO SAPIENS	RL39_HUMAN 60S ribosomal protein L39
6205	hIP190-13	hIP190-013	LARP7	[354-1]	0	Q59GN2	1	1	19.6	0.49	0.0028	6322.7	HOMO SAPIENS	R39L5_HUMAN Putative 60S ribosomal protein L39-like 5
6206	hIP190-13	hIP190-013	LARP7	[355]		decoy	1	2	7.3	0.46	0.0061	21360.6	HOMO SAPIENS	CU032_HUMAN Putative uncharacterized protein C21orf32
6207	hIP190-13	hIP190-013	LARP7	[356]		Q8N290	1	1	6.9	0.41	0.0073	22882.2	HOMO SAPIENS	CC053_HUMAN Putative uncharacterized protein C3orf53
6208	hIP190-13	hIP190-013	LARP7	[357]		Q99496	1	1	12.8	0.39	0.008	37655.7	HOMO SAPIENS	RING2_HUMAN E3 ubiquitin-protein ligase RING2
6209	hIP190-13	hIP190-013	LARP7	[358]		P17844	1	1	1.6	0.36	0.0044	69148.7	HOMO SAPIENS	DDX5_HUMAN Probable ATP-dependent RNA helicase DDX5
6210	hIP190-13	hIP190-013	LARP7	[358-1]	0	Q92841	1	1	1.5	0.36	0.0044	72372.1	HOMO SAPIENS	DDX17_HUMAN Probable ATP-dependent RNA helicase DDX17
6211	hIP190-13	hIP190-013	LARP7	[359]		Q9NVP1	1	1	1.6	0.35	0.0051	75407.4	HOMO SAPIENS	DDX18_HUMAN ATP-dependent RNA helicase DDX18
6212	hIP190-13	hIP190-013	LARP7	[360]		Q9BQI6	1	1	1	0.35	0.004	121051	HOMO SAPIENS	ANR32_HUMAN Ankyrin repeat domain-containing protein 32
6213	hIP190-13	hIP190-013	LARP7	[361]		O75151	1	1	1.3	0.35	0.0036	120776	HOMO SAPIENS	PHF2_HUMAN Lysine-specific demethylase PHF2
6214	hIP190-13	hIP190-013	LARP7	[361-1]	0	Q9UPP1	1	1	1.3	0.35	0.0036	117865	HOMO SAPIENS	PHF8_HUMAN Histone lysine demethylase PHF8
6215	hIP190-13	hIP190-013	LARP7	[362]		P27824	1	1	2.7	0.33	0.0015	67568.9	HOMO SAPIENS	CALX_HUMAN Calnexin
6216	hIP190-13	hIP190-013	LARP7	[363]		Q8TAE8	1	1	9	0.32	0.004	25384	HOMO SAPIENS	G45IP_HUMAN Growth arrest and DNA damage-inducible proteins-interacting protein 1
6217	hIP190-13	hIP190-013	LARP7	[364]		P62861	1	1	16.9	0.28	0.006	6647.9	HOMO SAPIENS	RS30_HUMAN 40S ribosomal protein S30
6218	hIP190-13	hIP190-013	LARP7	[365]		Q5T653	1	1	4.6	0.27	0.0062	33301.1	HOMO SAPIENS	RM02_HUMAN 39S ribosomal protein L2, mitochondrial
6219	hIP190-13	hIP190-013	LARP7	[366]		P13639	1	1	1.2	0.23	0.0086	95339	HOMO SAPIENS	EF2_HUMAN Elongation factor 2
6220	hIP190-13	hIP190-013	LARP7	[367]		P51790	1	1	2.2	0.22	0.007	90967.1	HOMO SAPIENS	CLCN3_HUMAN H(+)/Cl(-) exchange transporter 3
6221	hIP190-13	hIP190-013	LARP7	[368]		decoy	1	1	1.5	0.22	0.0071	74820.5	HOMO SAPIENS	SPT13_HUMAN Spermatogenesis-associated protein 13
6222	hIP190-13	hIP190-013	LARP7	[369]		Q8TBF4	1	1	8.8	0.18	0.0054	24592	HOMO SAPIENS	ZCRB1_HUMAN Zinc finger CCHC-type and RNA-binding motif-containing protein 1
6223	hIP190-13	hIP190-013	LARP7	[370]		P51665	1	1	3.4	0.16	0.0071	37025.7	HOMO SAPIENS	PSD7_HUMAN 26S proteasome non-ATPase regulatory subunit 7
6224	hIP190-13	hIP190-013	LARP7	[371]		P48047	1	1	5.2	0.14	0.0051	23277.5	HOMO SAPIENS	ATPO_HUMAN ATP synthase subunit O, mitochondrial
6225	hIP190-13	hIP190-013	LARP7	[372]		Q9BRD0	1	1	2.1	0.14	0.0082	70521.3	HOMO SAPIENS	BUD13_HUMAN BUD13 homolog
6226	hIP190-13	hIP190-013	LARP7	[373]		O60232	1	1	8.5	0.12	0.0086	21474.5	HOMO SAPIENS	SSA27_HUMAN Sjoegren syndrome/scleroderma autoantigen 1
6227	hIP190-13	hIP190-013	LARP7	[374]		decoy	1	1	1.3	0.08	0.0036	213148	HOMO SAPIENS	CE192_HUMAN Centrosomal protein of 192 kDa
6228	hIP190-13	hIP190-013	LARP7	[375]		O15372	1	1	3.4	0.07	0.0075	39930.7	HOMO SAPIENS	EIF3H_HUMAN Eukaryotic translation initiation factor 3 subunit H
6229	hIP190-13	hIP190-013	LARP7	[376]		Q14444	1	1	1.6	0.02	0.0067	78366.9	HOMO SAPIENS	CAPR1_HUMAN Caprin-1

## Sheet: LARP7 #2
	ID			Rank	Uniq Pep	Acc #	Num Unique	Peptide Count	% Cov	Best Disc Score	Best Expect Val	Protein MW	Species	Protein Name
3503	hIP191-6	hIP191-06	LARP7	[1]		Q15020	47	100	51.7	7.14	8.2e-11	109936	HOMO SAPIENS	SART3_HUMAN Squamous cell carcinoma antigen recognized by T-cells 3
3504	hIP191-6	hIP191-06	LARP7	[2]		Q9UHB9	39	64	54.4	6.15	2e-10	70730.2	HOMO SAPIENS	SRP68_HUMAN Signal recognition particle 68 kDa protein
3505	hIP191-6	hIP191-06	LARP7	[3]		P19338	29	64	33	5.91	5.4e-09	76615	HOMO SAPIENS	NUCL_HUMAN Nucleolin
3506	hIP191-6	hIP191-06	LARP7	[4]		Q4G0J3	32	63	48.1	4.94	4.5e-08	66899.2	HOMO SAPIENS	LARP7_HUMAN La-related protein 7
3507	hIP191-6	hIP191-06	LARP7	[5]		O76094	26	54	48.3	5.91	9.7e-10	74606.8	HOMO SAPIENS	SRP72_HUMAN Signal recognition particle 72 kDa protein
3508	hIP191-6	hIP191-06	LARP7	[6]		P08107	24	36	47.3	5.35	1.6e-08	70052.8	HOMO SAPIENS	HSP71_HUMAN Heat shock 70 kDa protein 1A/1B
3509	hIP191-6	hIP191-06	LARP7	[6-1]	20	P11142	23	34	41.5	5.44	7.3e-09	70898.7	HOMO SAPIENS	HSP7C_HUMAN Heat shock cognate 71 kDa protein
3510	hIP191-6	hIP191-06	LARP7	[6-2]	1	P34931	12	19	26.8	5.17	3.9e-08	70375.6	HOMO SAPIENS	HS71L_HUMAN Heat shock 70 kDa protein 1-like
3511	hIP191-6	hIP191-06	LARP7	[6-3]	7	P11021	8	10	15.6	4.89	2.1e-07	72333.5	HOMO SAPIENS	GRP78_HUMAN 78 kDa glucose-regulated protein
3512	hIP191-6	hIP191-06	LARP7	[6-4]	4	P54652	7	10	11.1	4.89	2.1e-07	70021.5	HOMO SAPIENS	HSP72_HUMAN Heat shock-related 70 kDa protein 2
3513	hIP191-6	hIP191-06	LARP7	[6-5]	0	P17066	7	11	12	3.34	7.5e-06	71028.7	HOMO SAPIENS	HSP76_HUMAN Heat shock 70 kDa protein 6
3514	hIP191-6	hIP191-06	LARP7	[6-6]	0	P48741	5	8	14.2	2.97	8.7e-06	40244.8	HOMO SAPIENS	HSP77_HUMAN Putative heat shock 70 kDa protein 7
3515	hIP191-6	hIP191-06	LARP7	[7]		P46777	23	52	54.5	5.51	8.3e-09	34362.9	HOMO SAPIENS	RL5_HUMAN 60S ribosomal protein L5
3516	hIP191-6	hIP191-06	LARP7	[8]		P04264	28	42	39.3	4.95	2.3e-09	66039.2	HOMO SAPIENS	K2C1_HUMAN Keratin, type II cytoskeletal 1
3517	hIP191-6	hIP191-06	LARP7	[8-1]	10	P35908	12	15	21.3	4.2	1.1e-07	65433.4	HOMO SAPIENS	K22E_HUMAN Keratin, type II cytoskeletal 2 epidermal
3518	hIP191-6	hIP191-06	LARP7	[8-2, 277-1]	2	P04259	3	6	5.5	1.91	0.0005	60067.4	HOMO SAPIENS	K2C6B_HUMAN Keratin, type II cytoskeletal 6B
3519	hIP191-6	hIP191-06	LARP7	[8-3]	0	Q7Z794	1	1	2.1	3.62	2.8e-06	61901.9	HOMO SAPIENS	K2C1B_HUMAN Keratin, type II cytoskeletal 1b
3520	hIP191-6	hIP191-06	LARP7	[9]		Q9H6E5	17	21	28.4	6.57	2.2e-10	93847.7	HOMO SAPIENS	STPAP_HUMAN Speckle targeted PIP5K1A-regulated poly(A) polymerase
3521	hIP191-6	hIP191-06	LARP7	[10]		Q9NR30	21	21	35.9	5.05	5e-08	87345.1	HOMO SAPIENS	DDX21_HUMAN Nucleolar RNA helicase 2
3522	hIP191-6	hIP191-06	LARP7	[10-1]	0	Q9BQ39	1	1	2	1.43	0.00032	82565.7	HOMO SAPIENS	DDX50_HUMAN ATP-dependent RNA helicase DDX50
3523	hIP191-6	hIP191-06	LARP7	[11]		P11940	19	25	35.2	6.37	2.9e-11	70671.5	HOMO SAPIENS	PABP1_HUMAN Polyadenylate-binding protein 1
3524	hIP191-6	hIP191-06	LARP7	[11-1]	2	Q13310	8	14	14.8	6.37	2.9e-11	70783.5	HOMO SAPIENS	PABP4_HUMAN Polyadenylate-binding protein 4
3525	hIP191-6	hIP191-06	LARP7	[11-2]	0	Q9H361	8	10	15.5	3.24	1e-06	70031.5	HOMO SAPIENS	PABP3_HUMAN Polyadenylate-binding protein 3
3526	hIP191-6	hIP191-06	LARP7	[11-3]	0	Q4VXU2	4	5	7.2	3.24	1e-06	68392.9	HOMO SAPIENS	PAP1L_HUMAN Polyadenylate-binding protein 1-like
3527	hIP191-6	hIP191-06	LARP7	[11-4]	0	Q5JQF8	1	1	5.5	2.43	0.00014	22799.2	HOMO SAPIENS	PAP1M_HUMAN Polyadenylate-binding protein 1-like 2
3528	hIP191-6	hIP191-06	LARP7	[12]		P67809	14	33	66	6.52	5.2e-09	35924.5	HOMO SAPIENS	YBOX1_HUMAN Nuclease-sensitive element-binding protein 1
3529	hIP191-6	hIP191-06	LARP7	[12-1]	4	P16989	8	13	38.7	5.54	4e-09	40090.2	HOMO SAPIENS	DBPA_HUMAN DNA-binding protein A
3530	hIP191-6	hIP191-06	LARP7	[12-2]	0	Q9Y2T7	4	9	11	5.5	5.2e-09	38518.3	HOMO SAPIENS	YBOX2_HUMAN Y-box-binding protein 2
3531	hIP191-6	hIP191-06	LARP7	[13]		P36578	18	25	42.9	5.57	4.4e-09	47697.7	HOMO SAPIENS	RL4_HUMAN 60S ribosomal protein L4
3532	hIP191-6	hIP191-06	LARP7	[14]		P52292	19	76	38.9	5.63	8.9e-10	57862.4	HOMO SAPIENS	IMA2_HUMAN Importin subunit alpha-2
3533	hIP191-6	hIP191-06	LARP7	[14-1]	0	A9QM74	1	3	2.1	0.8	0.0029	56938.4	HOMO SAPIENS	IMA8_HUMAN Importin subunit alpha-8
3534	hIP191-6	hIP191-06	LARP7	[15]		O60684	17	30	34	5.78	2.5e-09	60030	HOMO SAPIENS	IMA7_HUMAN Importin subunit alpha-7
3535	hIP191-6	hIP191-06	LARP7	[15-1]	7	P52294	11	18	23	5.95	1.4e-08	60222.3	HOMO SAPIENS	IMA1_HUMAN Importin subunit alpha-1
3536	hIP191-6	hIP191-06	LARP7	[15-2]	3	O15131	9	14	20	4.91	4.7e-07	60349.5	HOMO SAPIENS	IMA5_HUMAN Importin subunit alpha-6
3537	hIP191-6	hIP191-06	LARP7	[16]		P10155	18	25	36.2	6.08	1.7e-10	60671.2	HOMO SAPIENS	RO60_HUMAN 60 kDa SS-A/Ro ribonucleoprotein
3538	hIP191-6	hIP191-06	LARP7	[17]		P61247	17	32	51.1	5.97	1.4e-09	29945.2	HOMO SAPIENS	RS3A_HUMAN 40S ribosomal protein S3a
3539	hIP191-6	hIP191-06	LARP7	[18]		P06748	17	30	37.1	5.97	2.7e-10	32575.3	HOMO SAPIENS	NPM_HUMAN Nucleophosmin
3540	hIP191-6	hIP191-06	LARP7	[19]		Q99575	15	17	19.9	5.68	6.1e-09	114710	HOMO SAPIENS	POP1_HUMAN Ribonucleases P/MRP protein subunit POP1
3541	hIP191-6	hIP191-06	LARP7	[20]		Q9BUJ2	15	19	24.3	5.77	3.6e-09	95739.3	HOMO SAPIENS	HNRL1_HUMAN Heterogeneous nuclear ribonucleoprotein U-like protein 1
3542	hIP191-6	hIP191-06	LARP7	[21]		P07437	17	23	50.5	4.65	7.2e-08	49671.3	HOMO SAPIENS	TBB5_HUMAN Tubulin beta chain
3543	hIP191-6	hIP191-06	LARP7	[21-1]	5	P68371	17	22	50.3	3.63	3e-06	49831.5	HOMO SAPIENS	TBB4B_HUMAN Tubulin beta-4B chain
3544	hIP191-6	hIP191-06	LARP7	[21-2]	3	P04350	14	19	45	3.63	3e-06	49586.2	HOMO SAPIENS	TBB4A_HUMAN Tubulin beta-4A chain
3545	hIP191-6	hIP191-06	LARP7	[21-3]	2	Q13885	12	17	32.4	4.14	1.4e-07	49907.4	HOMO SAPIENS	TBB2A_HUMAN Tubulin beta-2A chain
3546	hIP191-6	hIP191-06	LARP7	[21-4]	2	Q9BVA1	12	17	32.4	4.14	1.4e-07	49953.5	HOMO SAPIENS	TBB2B_HUMAN Tubulin beta-2B chain
3547	hIP191-6	hIP191-06	LARP7	[21-5]	2	Q13509	9	14	26.4	4.04	1.4e-07	50433.2	HOMO SAPIENS	TBB3_HUMAN Tubulin beta-3 chain
3548	hIP191-6	hIP191-06	LARP7	[21-6]	2	Q9BUF5	7	10	14.3	3.21	3.7e-06	49857.6	HOMO SAPIENS	TBB6_HUMAN Tubulin beta-6 chain
3549	hIP191-6	hIP191-06	LARP7	[21-7]	1	Q3ZCM7	6	8	18	2.42	3.9e-05	49776.5	HOMO SAPIENS	TBB8_HUMAN Tubulin beta-8 chain
3550	hIP191-6	hIP191-06	LARP7	[21-8]	0	A6NNZ2	5	7	14.6	2.42	3.9e-05	49573.1	HOMO SAPIENS	TBB8B_HUMAN Tubulin beta-8 chain B
3551	hIP191-6	hIP191-06	LARP7	[21-9]	0	A6NKZ8	3	4	6.5	1.99	0.00055	41775.5	HOMO SAPIENS	YI016_HUMAN Putative tubulin beta chain-like protein ENSP00000290377
3552	hIP191-6	hIP191-06	LARP7	[21-10]	0	Q9H4B7	1	2	2.2	1.76	0.00078	50327.4	HOMO SAPIENS	TBB1_HUMAN Tubulin beta-1 chain
3553	hIP191-6	hIP191-06	LARP7	[22]		P23396	18	33	72	5.01	5.3e-09	26688.6	HOMO SAPIENS	RS3_HUMAN 40S ribosomal protein S3
3554	hIP191-6	hIP191-06	LARP7	[23]		Q7L2J0	21	34	45.4	4.1	1.7e-07	74355.8	HOMO SAPIENS	MEPCE_HUMAN 7SK snRNA methylphosphate capping enzyme
3555	hIP191-6	hIP191-06	LARP7	[24]		P68400	15	24	45.5	5.66	7e-10	45144	HOMO SAPIENS	CSK21_HUMAN Casein kinase II subunit alpha
3556	hIP191-6	hIP191-06	LARP7	[24-1]	11	P19784	12	16	50	5.77	1.7e-09	41213.6	HOMO SAPIENS	CSK22_HUMAN Casein kinase II subunit alpha'
3557	hIP191-6	hIP191-06	LARP7	[25]		P82933	13	14	36.9	5.98	1.5e-09	45835.2	HOMO SAPIENS	RT09_HUMAN 28S ribosomal protein S9, mitochondrial
3558	hIP191-6	hIP191-06	LARP7	[26]		Q9Y2X3	12	16	30.6	6.74	3.3e-11	59578.7	HOMO SAPIENS	NOP58_HUMAN Nucleolar protein 58
3559	hIP191-6	hIP191-06	LARP7	[27]		P68363	14	21	45.9	4.76	1.4e-07	50152.1	HOMO SAPIENS	TBA1B_HUMAN Tubulin alpha-1B chain
3560	hIP191-6	hIP191-06	LARP7	[27-1]	1	Q71U36	13	20	42.8	4.42	1.7e-07	50136.1	HOMO SAPIENS	TBA1A_HUMAN Tubulin alpha-1A chain
3561	hIP191-6	hIP191-06	LARP7	[27-2]	1	Q9BQE3	12	17	37	4.42	1.7e-07	49895.8	HOMO SAPIENS	TBA1C_HUMAN Tubulin alpha-1C chain
3562	hIP191-6	hIP191-06	LARP7	[27-3]	0	P68366	10	15	34.2	4.76	1.4e-07	49924.9	HOMO SAPIENS	TBA4A_HUMAN Tubulin alpha-4A chain
3563	hIP191-6	hIP191-06	LARP7	[27-4]	1	Q13748	10	16	35.6	4.42	1.7e-07	49960	HOMO SAPIENS	TBA3C_HUMAN Tubulin alpha-3C/D chain
3564	hIP191-6	hIP191-06	LARP7	[27-5]	1	Q6PEY2	8	14	30.9	4.42	1.7e-07	49859	HOMO SAPIENS	TBA3E_HUMAN Tubulin alpha-3E chain
3565	hIP191-6	hIP191-06	LARP7	[27-6]	1	Q9NY65	7	9	23.2	3.58	4.3e-07	50094	HOMO SAPIENS	TBA8_HUMAN Tubulin alpha-8 chain
3566	hIP191-6	hIP191-06	LARP7	[27-7]	0	Q9H853	1	1	5.8	2.65	9.1e-06	27551.5	HOMO SAPIENS	TBA4B_HUMAN Putative tubulin-like protein alpha-4B
3567	hIP191-6	hIP191-06	LARP7	[27-8]	0	A6NHL2	1	1	2	2.5	9.4e-06	49909.2	HOMO SAPIENS	TBAL3_HUMAN Tubulin alpha chain-like 3
3568	hIP191-6	hIP191-06	LARP7	[28]		P13645	14	14	28.8	6.02	4.3e-10	58827.5	HOMO SAPIENS	K1C10_HUMAN Keratin, type I cytoskeletal 10
3569	hIP191-6	hIP191-06	LARP7	[28-1]	3	P02533	5	5	9.7	2.79	2.8e-06	51561.9	HOMO SAPIENS	K1C14_HUMAN Keratin, type I cytoskeletal 14
3570	hIP191-6	hIP191-06	LARP7	[28-2]	1	P08779	3	3	3.8	1.82	0.001	51268.3	HOMO SAPIENS	K1C16_HUMAN Keratin, type I cytoskeletal 16
3571	hIP191-6	hIP191-06	LARP7	[28-3]	0	Q7Z3Y7	3	3	3.9	1.82	0.001	50567.8	HOMO SAPIENS	K1C28_HUMAN Keratin, type I cytoskeletal 28
3572	hIP191-6	hIP191-06	LARP7	[28-4]	0	Q7Z3Y8	3	3	3.9	1.82	0.001	49822.8	HOMO SAPIENS	K1C27_HUMAN Keratin, type I cytoskeletal 27
3573	hIP191-6	hIP191-06	LARP7	[28-5]	0	Q7Z3Z0	3	3	4	1.82	0.001	49318.3	HOMO SAPIENS	K1C25_HUMAN Keratin, type I cytoskeletal 25
3574	hIP191-6	hIP191-06	LARP7	[28-6]	0	Q7Z3Y9	2	2	1.9	1.82	0.001	51911.1	HOMO SAPIENS	K1C26_HUMAN Keratin, type I cytoskeletal 26
3575	hIP191-6	hIP191-06	LARP7	[29]		Q96RS0	14	18	23.4	5.85	5.1e-10	96620.6	HOMO SAPIENS	TGS1_HUMAN Trimethylguanosine synthase
3576	hIP191-6	hIP191-06	LARP7	[30]		P35527	13	15	23.6	5.5	7.5e-09	62064.8	HOMO SAPIENS	K1C9_HUMAN Keratin, type I cytoskeletal 9
3577	hIP191-6	hIP191-06	LARP7	[31]		P62701	14	28	42.6	4.94	1.3e-08	29598	HOMO SAPIENS	RS4X_HUMAN 40S ribosomal protein S4, X isoform
3578	hIP191-6	hIP191-06	LARP7	[31-1]	0	P22090	4	5	11.8	3.01	1.6e-06	29455.9	HOMO SAPIENS	RS4Y1_HUMAN 40S ribosomal protein S4, Y isoform 1
3579	hIP191-6	hIP191-06	LARP7	[31-2]	0	Q8TD47	4	5	11.4	3.01	1.6e-06	29295.7	HOMO SAPIENS	RS4Y2_HUMAN 40S ribosomal protein S4, Y isoform 2
3580	hIP191-6	hIP191-06	LARP7	[32]		Q14974	15	18	21.5	4.25	3.1e-07	97171.1	HOMO SAPIENS	IMB1_HUMAN Importin subunit beta-1
3581	hIP191-6	hIP191-06	LARP7	[33]		Q13263	18	24	39.9	3.61	1.1e-06	88550.5	HOMO SAPIENS	TIF1B_HUMAN Transcription intermediary factor 1-beta
3582	hIP191-6	hIP191-06	LARP7	[34]		O60506	15	21	37.6	3.74	2.2e-06	69603.2	HOMO SAPIENS	HNRPQ_HUMAN Heterogeneous nuclear ribonucleoprotein Q
3583	hIP191-6	hIP191-06	LARP7	[34-1]	9	O43390	12	14	27.8	4.49	8.5e-08	70943.6	HOMO SAPIENS	HNRPR_HUMAN Heterogeneous nuclear ribonucleoprotein R
3584	hIP191-6	hIP191-06	LARP7	[35]		Q00839	12	17	19.6	5.06	2.8e-08	90585.2	HOMO SAPIENS	HNRPU_HUMAN Heterogeneous nuclear ribonucleoprotein U
3585	hIP191-6	hIP191-06	LARP7	[36]		P08708	11	14	60	6.21	1.2e-10	15550.3	HOMO SAPIENS	RS17_HUMAN 40S ribosomal protein S17
3586	hIP191-6	hIP191-06	LARP7	[36-1]	0	P0CW22	11	14	60	6.21	1.2e-10	15550.3	HOMO SAPIENS	RS17L_HUMAN 40S ribosomal protein S17-like
3587	hIP191-6	hIP191-06	LARP7	[37]		Q08211	14	16	18.5	4.42	1.3e-07	140960	HOMO SAPIENS	DHX9_HUMAN ATP-dependent RNA helicase A
3588	hIP191-6	hIP191-06	LARP7	[38]		Q99832	9	9	21	7.04	2.6e-11	59367.2	HOMO SAPIENS	TCPH_HUMAN T-complex protein 1 subunit eta
3589	hIP191-6	hIP191-06	LARP7	[39]		P05455	15	17	38	3.76	8.1e-07	46837.4	HOMO SAPIENS	LA_HUMAN Lupus La protein
3590	hIP191-6	hIP191-06	LARP7	[40]		P15880	14	26	38.9	4.1	1.6e-07	31324.7	HOMO SAPIENS	RS2_HUMAN 40S ribosomal protein S2
3591	hIP191-6	hIP191-06	LARP7	[41]		P25398	9	22	53.8	6.58	1.3e-10	14515.1	HOMO SAPIENS	RS12_HUMAN 40S ribosomal protein S12
3592	hIP191-6	hIP191-06	LARP7	[42]		O43395	15	19	27.1	3.94	6.6e-07	77529.6	HOMO SAPIENS	PRPF3_HUMAN U4/U6 small nuclear ribonucleoprotein Prp3
3593	hIP191-6	hIP191-06	LARP7	[43]		P37108	11	42	50	5.04	1.1e-07	14570.1	HOMO SAPIENS	SRP14_HUMAN Signal recognition particle 14 kDa protein
3594	hIP191-6	hIP191-06	LARP7	[44]		O43172	15	21	29.5	4.09	3.6e-07	58449.7	HOMO SAPIENS	PRP4_HUMAN U4/U6 small nuclear ribonucleoprotein Prp4
3595	hIP191-6	hIP191-06	LARP7	[45]		P62241	11	17	57.7	4.77	1.3e-07	24205.4	HOMO SAPIENS	RS8_HUMAN 40S ribosomal protein S8
3596	hIP191-6	hIP191-06	LARP7	[46]		P46782	10	22	41.2	5.7	2.2e-09	22876.6	HOMO SAPIENS	RS5_HUMAN 40S ribosomal protein S5
3597	hIP191-6	hIP191-06	LARP7	[47]		P05388	12	22	45.4	4.43	3.9e-08	34273.8	HOMO SAPIENS	RLA0_HUMAN 60S acidic ribosomal protein P0
3598	hIP191-6	hIP191-06	LARP7	[47-1]	0	Q8NHW5	8	13	27.4	3.45	1.7e-06	34364.8	HOMO SAPIENS	RLA0L_HUMAN 60S acidic ribosomal protein P0-like
3599	hIP191-6	hIP191-06	LARP7	[48]		P09132	11	19	55.6	4.44	1.1e-07	16155.8	HOMO SAPIENS	SRP19_HUMAN Signal recognition particle 19 kDa protein
3600	hIP191-6	hIP191-06	LARP7	[49]		P62829	10	22	46.4	6.57	2.1e-11	14865.6	HOMO SAPIENS	RL23_HUMAN 60S ribosomal protein L23
3601	hIP191-6	hIP191-06	LARP7	[50]		P78347	13	13	16.5	4.9	1.4e-08	112417	HOMO SAPIENS	GTF2I_HUMAN General transcription factor II-I
3602	hIP191-6	hIP191-06	LARP7	[51]		P52272	11	15	21	4.99	1.2e-07	77516.4	HOMO SAPIENS	HNRPM_HUMAN Heterogeneous nuclear ribonucleoprotein M
3603	hIP191-6	hIP191-06	LARP7	[52]		Q7L2E3	19	20	19.8	2.96	1e-05	133939	HOMO SAPIENS	DHX30_HUMAN Putative ATP-dependent RNA helicase DHX30
3604	hIP191-6	hIP191-06	LARP7	[53]		Q12905	9	9	32.8	6.8	2.3e-11	43062.5	HOMO SAPIENS	ILF2_HUMAN Interleukin enhancer-binding factor 2
3605	hIP191-6	hIP191-06	LARP7	[54]		P62753	8	11	28.1	6.39	3e-10	28680.9	HOMO SAPIENS	RS6_HUMAN 40S ribosomal protein S6
3606	hIP191-6	hIP191-06	LARP7	[55]		P38646	11	13	23	4.67	2.5e-08	73681.1	HOMO SAPIENS	GRP75_HUMAN Stress-70 protein, mitochondrial
3607	hIP191-6	hIP191-06	LARP7	[56]		P21333	11	11	7.3	4.63	6.7e-08	280741	HOMO SAPIENS	FLNA_HUMAN Filamin-A
3608	hIP191-6	hIP191-06	LARP7	[57]		P39023	10	18	26.3	5.25	2e-09	46109.3	HOMO SAPIENS	RL3_HUMAN 60S ribosomal protein L3
3609	hIP191-6	hIP191-06	LARP7	[57-1]	1	Q92901	3	3	8.1	0.74	0.0062	46296.4	HOMO SAPIENS	RL3L_HUMAN 60S ribosomal protein L3-like
3610	hIP191-6	hIP191-06	LARP7	[58]		P27635	13	16	43.5	3.54	3.4e-06	24604.1	HOMO SAPIENS	RL10_HUMAN 60S ribosomal protein L10
3611	hIP191-6	hIP191-06	LARP7	[58-1]	0	Q96L21	5	5	15	1.87	0.00016	24519	HOMO SAPIENS	RL10L_HUMAN 60S ribosomal protein L10-like
3612	hIP191-6	hIP191-06	LARP7	[59]		Q9NZI8	9	9	21.8	5.43	2.3e-08	63481.1	HOMO SAPIENS	IF2B1_HUMAN Insulin-like growth factor 2 mRNA-binding protein 1
3613	hIP191-6	hIP191-06	LARP7	[59-1]	5	O00425	6	7	16.4	2.82	2.6e-06	63705.6	HOMO SAPIENS	IF2B3_HUMAN Insulin-like growth factor 2 mRNA-binding protein 3
3614	hIP191-6	hIP191-06	LARP7	[59-2]	3	Q9Y6M1	4	5	9.8	2.04	6.2e-05	66121.9	HOMO SAPIENS	IF2B2_HUMAN Insulin-like growth factor 2 mRNA-binding protein 2
3615	hIP191-6	hIP191-06	LARP7	[60]		Q96EY7	8	10	16.7	5.36	1.3e-07	78550.4	HOMO SAPIENS	PTCD3_HUMAN Pentatricopeptide repeat-containing protein 3, mitochondrial
3616	hIP191-6	hIP191-06	LARP7	[61]		Q6PKG0	12	12	21.3	4.5	2.6e-08	123511	HOMO SAPIENS	LARP1_HUMAN La-related protein 1
3617	hIP191-6	hIP191-06	LARP7	[61-1]	0	Q659C4	1	1	1.5	4.5	2.6e-08	105323	HOMO SAPIENS	LAR1B_HUMAN La-related protein 1B
3618	hIP191-6	hIP191-06	LARP7	[62]		P07900	10	10	18.9	4.5	5.9e-08	84660.4	HOMO SAPIENS	HS90A_HUMAN Heat shock protein HSP 90-alpha
3619	hIP191-6	hIP191-06	LARP7	[62-1]	4	P08238	8	8	15.2	4.44	2e-07	83264.9	HOMO SAPIENS	HS90B_HUMAN Heat shock protein HSP 90-beta
3620	hIP191-6	hIP191-06	LARP7	[62-2]	0	Q12931	1	1	2	3.78	2.9e-06	80110.7	HOMO SAPIENS	TRAP1_HUMAN Heat shock protein 75 kDa, mitochondrial
3621	hIP191-6	hIP191-06	LARP7	[62-3]	1	Q58FF8	2	2	5.8	1.47	0.0011	44349.3	HOMO SAPIENS	H90B2_HUMAN Putative heat shock protein HSP 90-beta 2
3622	hIP191-6	hIP191-06	LARP7	[62-4]	0	Q58FG1	1	1	3.1	1.9	3.1e-05	47712.3	HOMO SAPIENS	HS904_HUMAN Putative heat shock protein HSP 90-alpha A4
3623	hIP191-6	hIP191-06	LARP7	[62-5]	0	Q58FG0	2	2	7.5	1.17	0.00045	38738.3	HOMO SAPIENS	HS905_HUMAN Putative heat shock protein HSP 90-alpha A5
3624	hIP191-6	hIP191-06	LARP7	[62-6]	0	Q14568	1	1	3.5	1.41	0.0017	39365.1	HOMO SAPIENS	HS902_HUMAN Putative heat shock protein HSP 90-alpha A2
3625	hIP191-6	hIP191-06	LARP7	[63]		P39019	11	18	57.2	4.1	5.7e-07	16060.6	HOMO SAPIENS	RS19_HUMAN 40S ribosomal protein S19
3626	hIP191-6	hIP191-06	LARP7	[64]		Q99714	8	10	46.4	5.2	1.7e-08	26923.3	HOMO SAPIENS	HCD2_HUMAN 3-hydroxyacyl-CoA dehydrogenase type-2
3627	hIP191-6	hIP191-06	LARP7	[65]		P78371	8	9	25	5.55	1.4e-08	57488.7	HOMO SAPIENS	TCPB_HUMAN T-complex protein 1 subunit beta
3628	hIP191-6	hIP191-06	LARP7	[66]		P61011	10	10	26.4	4.16	1.3e-07	55705.3	HOMO SAPIENS	SRP54_HUMAN Signal recognition particle 54 kDa protein
3629	hIP191-6	hIP191-06	LARP7	[67]		P30050	7	12	54.5	5.53	1.2e-08	17818.7	HOMO SAPIENS	RL12_HUMAN 60S ribosomal protein L12
3630	hIP191-6	hIP191-06	LARP7	[68]		O00629	9	19	28.6	4.59	1.8e-07	57887.2	HOMO SAPIENS	IMA4_HUMAN Importin subunit alpha-4
3631	hIP191-6	hIP191-06	LARP7	[68-1]	5	O00505	7	16	16.9	4.38	2.3e-08	57811.4	HOMO SAPIENS	IMA3_HUMAN Importin subunit alpha-3
3632	hIP191-6	hIP191-06	LARP7	[69]		Q09161	10	15	18.9	4.89	5.6e-09	91840.3	HOMO SAPIENS	NCBP1_HUMAN Nuclear cap-binding protein subunit 1
3633	hIP191-6	hIP191-06	LARP7	[70]		O43143	10	11	15.2	3.77	8.7e-06	90933.6	HOMO SAPIENS	DHX15_HUMAN Putative pre-mRNA-splicing factor ATP-dependent RNA helicase DHX15
3634	hIP191-6	hIP191-06	LARP7	[71]		Q7Z4Q2	9	9	20.3	4.94	2.4e-08	74583.4	HOMO SAPIENS	HEAT3_HUMAN HEAT repeat-containing protein 3
3635	hIP191-6	hIP191-06	LARP7	[72]		P05387	7	14	85.2	5.67	5.7e-09	11665	HOMO SAPIENS	RLA2_HUMAN 60S acidic ribosomal protein P2
3636	hIP191-6	hIP191-06	LARP7	[72-1]	3	P05386	4	13	67.5	4.33	8.7e-08	11514	HOMO SAPIENS	RLA1_HUMAN 60S acidic ribosomal protein P1
3637	hIP191-6	hIP191-06	LARP7	[73]		P62316	8	12	55.1	5.71	9.8e-10	13527	HOMO SAPIENS	SMD2_HUMAN Small nuclear ribonucleoprotein Sm D2
3638	hIP191-6	hIP191-06	LARP7	[74]		Q9HCE1	13	13	18.9	3.73	1.2e-07	113672	HOMO SAPIENS	MOV10_HUMAN Putative helicase MOV-10
3639	hIP191-6	hIP191-06	LARP7	[75]		P62263	10	15	41.7	4.13	3.4e-07	16272.9	HOMO SAPIENS	RS14_HUMAN 40S ribosomal protein S14
3640	hIP191-6	hIP191-06	LARP7	[76]		P17987	7	9	18.7	5.08	1.3e-07	60344.1	HOMO SAPIENS	TCPA_HUMAN T-complex protein 1 subunit alpha
3641	hIP191-6	hIP191-06	LARP7	[77]		Q7Z2W4	8	8	15.3	4.85	2.3e-07	101432	HOMO SAPIENS	ZCCHV_HUMAN Zinc finger CCCH-type antiviral protein 1
3642	hIP191-6	hIP191-06	LARP7	[78]		O75533	10	11	14.3	3.84	1.4e-06	145832	HOMO SAPIENS	SF3B1_HUMAN Splicing factor 3B subunit 1
3643	hIP191-6	hIP191-06	LARP7	[79]		P49790	8	8	9.1	5.72	7.1e-10	153940	HOMO SAPIENS	NU153_HUMAN Nuclear pore complex protein Nup153
3644	hIP191-6	hIP191-06	LARP7	[80]		P35637	8	11	21.9	4.71	3.3e-07	53426.2	HOMO SAPIENS	FUS_HUMAN RNA-binding protein FUS
3645	hIP191-6	hIP191-06	LARP7	[80-1]	1	Q92804	3	3	6.9	1.71	0.0003	61830.4	HOMO SAPIENS	RBP56_HUMAN TATA-binding protein-associated factor 2N
3646	hIP191-6	hIP191-06	LARP7	[81]		P62280	8	10	42.4	4.95	9.2e-08	18430.9	HOMO SAPIENS	RS11_HUMAN 40S ribosomal protein S11
3647	hIP191-6	hIP191-06	LARP7	[82]		Q92665	7	8	24.8	5.36	4.6e-09	45318.8	HOMO SAPIENS	RT31_HUMAN 28S ribosomal protein S31, mitochondrial
3648	hIP191-6	hIP191-06	LARP7	[83]		P40939	12	12	23.6	3.64	2e-07	83000.4	HOMO SAPIENS	ECHA_HUMAN Trifunctional enzyme subunit alpha, mitochondrial
3649	hIP191-6	hIP191-06	LARP7	[84]		P67870	8	11	38.6	4.69	5.3e-08	24942.7	HOMO SAPIENS	CSK2B_HUMAN Casein kinase II subunit beta
3650	hIP191-6	hIP191-06	LARP7	[85]		P62424	8	14	26.3	4.75	2.9e-08	29995.9	HOMO SAPIENS	RL7A_HUMAN 60S ribosomal protein L7a
3651	hIP191-6	hIP191-06	LARP7	[86]		Q15393	8	9	8.9	3.98	3.2e-07	135578	HOMO SAPIENS	SF3B3_HUMAN Splicing factor 3B subunit 3
3652	hIP191-6	hIP191-06	LARP7	[87]		P30153	7	7	16	5.71	1e-08	65309.2	HOMO SAPIENS	2AAA_HUMAN Serine/threonine-protein phosphatase 2A 65 kDa regulatory subunit A alpha isoform
3653	hIP191-6	hIP191-06	LARP7	[88]		P35573	9	9	8.2	4.77	3.4e-09	174765	HOMO SAPIENS	GDE_HUMAN Glycogen debranching enzyme
3654	hIP191-6	hIP191-06	LARP7	[89]		Q8TEQ6	8	8	7.5	5.42	1.4e-09	168591	HOMO SAPIENS	GEMI5_HUMAN Gem-associated protein 5
3655	hIP191-6	hIP191-06	LARP7	[90]		P50990	8	8	17.3	4.74	8.4e-09	59621.1	HOMO SAPIENS	TCPQ_HUMAN T-complex protein 1 subunit theta
3656	hIP191-6	hIP191-06	LARP7	[91]		Q15365	6	6	30.6	5.82	2.7e-09	37498.2	HOMO SAPIENS	PCBP1_HUMAN Poly(rC)-binding protein 1
3657	hIP191-6	hIP191-06	LARP7	[91-1]	4	Q15366	6	6	32.1	5.82	2.7e-09	38580.4	HOMO SAPIENS	PCBP2_HUMAN Poly(rC)-binding protein 2
3658	hIP191-6	hIP191-06	LARP7	[91-2]	1	P57721	3	3	11.6	5.82	2.7e-09	39465.6	HOMO SAPIENS	PCBP3_HUMAN Poly(rC)-binding protein 3
3659	hIP191-6	hIP191-06	LARP7	[92]		Q15233	7	8	24.4	4.89	2.7e-08	54232	HOMO SAPIENS	NONO_HUMAN Non-POU domain-containing octamer-binding protein
3660	hIP191-6	hIP191-06	LARP7	[92-1]	3	P23246	4	4	10	2.7	5.5e-06	76150	HOMO SAPIENS	SFPQ_HUMAN Splicing factor, proline- and glutamine-rich
3661	hIP191-6	hIP191-06	LARP7	[93]		P62249	11	21	56.2	3.66	8.9e-08	16445.5	HOMO SAPIENS	RS16_HUMAN 40S ribosomal protein S16
3662	hIP191-6	hIP191-06	LARP7	[94]		Q12899	7	8	16.7	4.7	9.5e-08	62166.4	HOMO SAPIENS	TRI26_HUMAN Tripartite motif-containing protein 26
3663	hIP191-6	hIP191-06	LARP7	[95]		P46781	10	15	34.5	3.94	1.7e-07	22591.6	HOMO SAPIENS	RS9_HUMAN 40S ribosomal protein S9
3664	hIP191-6	hIP191-06	LARP7	[96]		Q9BY77	8	8	28	4.02	1.4e-07	46089.7	HOMO SAPIENS	PDIP3_HUMAN Polymerase delta-interacting protein 3
3665	hIP191-6	hIP191-06	LARP7	[97]		P08865	6	8	32.2	4.89	2.2e-07	32854.4	HOMO SAPIENS	RSSA_HUMAN 40S ribosomal protein SA
3666	hIP191-6	hIP191-06	LARP7	[98]		P50991	9	10	23	3.7	7.6e-07	57924.8	HOMO SAPIENS	TCPD_HUMAN T-complex protein 1 subunit delta
3667	hIP191-6	hIP191-06	LARP7	[99]		P62841	4	14	21.4	7.63	3e-12	17040.3	HOMO SAPIENS	RS15_HUMAN 40S ribosomal protein S15
3668	hIP191-6	hIP191-06	LARP7	[100]		P48643	7	9	19.8	4.29	2.1e-07	59671.6	HOMO SAPIENS	TCPE_HUMAN T-complex protein 1 subunit epsilon
3669	hIP191-6	hIP191-06	LARP7	[101]		P06576	7	8	19.5	4.14	3e-07	56560.4	HOMO SAPIENS	ATPB_HUMAN ATP synthase subunit beta, mitochondrial
3670	hIP191-6	hIP191-06	LARP7	[102]		Q92552	7	8	24.4	4.34	2.6e-07	47611.8	HOMO SAPIENS	RT27_HUMAN 28S ribosomal protein S27, mitochondrial
3671	hIP191-6	hIP191-06	LARP7	[103]		O60563	7	8	16	5.08	1.4e-09	80685.3	HOMO SAPIENS	CCNT1_HUMAN Cyclin-T1
3672	hIP191-6	hIP191-06	LARP7	[104]		P62847	6	11	29.3	4.78	1.5e-08	15423.3	HOMO SAPIENS	RS24_HUMAN 40S ribosomal protein S24
3673	hIP191-6	hIP191-06	LARP7	[105]		Q8N7H5	6	6	14.5	4.63	2.2e-07	59976.2	HOMO SAPIENS	PAF1_HUMAN RNA polymerase II-associated factor 1 homolog
3674	hIP191-6	hIP191-06	LARP7	[106]		P62269	9	16	44.7	3	2.2e-05	17718.8	HOMO SAPIENS	RS18_HUMAN 40S ribosomal protein S18
3675	hIP191-6	hIP191-06	LARP7	[107]		P22626	6	7	29.5	5.3	9e-10	37430	HOMO SAPIENS	ROA2_HUMAN Heterogeneous nuclear ribonucleoproteins A2/B1
3676	hIP191-6	hIP191-06	LARP7	[108]		P40227	6	6	17.5	5.38	1.1e-08	58024.7	HOMO SAPIENS	TCPZ_HUMAN T-complex protein 1 subunit zeta
3677	hIP191-6	hIP191-06	LARP7	[108-1]	0	Q92526	1	1	2.5	1.05	0.00052	57822	HOMO SAPIENS	TCPW_HUMAN T-complex protein 1 subunit zeta-2
3678	hIP191-6	hIP191-06	LARP7	[109]		Q8WWY3	7	8	20.2	4.58	6.2e-08	55456.5	HOMO SAPIENS	PRP31_HUMAN U4/U6 small nuclear ribonucleoprotein Prp31
3679	hIP191-6	hIP191-06	LARP7	[110]		P46783	6	14	29.7	5.03	1.4e-08	18897.9	HOMO SAPIENS	RS10_HUMAN 40S ribosomal protein S10
3680	hIP191-6	hIP191-06	LARP7	[110-1]	0	Q9NQ39	3	7	13.6	5.03	1.4e-08	20120.5	HOMO SAPIENS	RS10L_HUMAN Putative 40S ribosomal protein S10-like
3681	hIP191-6	hIP191-06	LARP7	[111]		P49368	8	9	21.5	3.86	1.3e-06	60534.5	HOMO SAPIENS	TCPG_HUMAN T-complex protein 1 subunit gamma
3682	hIP191-6	hIP191-06	LARP7	[112]		P35232	8	8	38.2	3.74	5.6e-07	29804.3	HOMO SAPIENS	PHB_HUMAN Prohibitin
3683	hIP191-6	hIP191-06	LARP7	[113]		P62888	7	10	59.1	3.8	1.8e-06	12784.2	HOMO SAPIENS	RL30_HUMAN 60S ribosomal protein L30
3684	hIP191-6	hIP191-06	LARP7	[114]		P62195	7	7	26.1	3.99	5.2e-07	45626.4	HOMO SAPIENS	PRS8_HUMAN 26S protease regulatory subunit 8
3685	hIP191-6	hIP191-06	LARP7	[114-1]	2	P62191	3	3	10.2	1.99	0.00026	49184.9	HOMO SAPIENS	PRS4_HUMAN 26S protease regulatory subunit 4
3686	hIP191-6	hIP191-06	LARP7	[115]		Q6P1J9	7	7	17.5	3.79	1.2e-06	60577.1	HOMO SAPIENS	CDC73_HUMAN Parafibromin
3687	hIP191-6	hIP191-06	LARP7	[116]		O60814	5	11	20.6	5.14	8.1e-09	13890.3	HOMO SAPIENS	H2B1K_HUMAN Histone H2B type 1-K
3688	hIP191-6	hIP191-06	LARP7	[116-1]	0	P06899	5	11	20.6	5.14	8.1e-09	13904.3	HOMO SAPIENS	H2B1J_HUMAN Histone H2B type 1-J
3689	hIP191-6	hIP191-06	LARP7	[116-2]	0	P23527	5	11	20.6	5.14	8.1e-09	13906.3	HOMO SAPIENS	H2B1O_HUMAN Histone H2B type 1-O
3690	hIP191-6	hIP191-06	LARP7	[116-3]	0	P33778	5	11	20.6	5.14	8.1e-09	13950.3	HOMO SAPIENS	H2B1B_HUMAN Histone H2B type 1-B
3691	hIP191-6	hIP191-06	LARP7	[116-4]	0	P57053	5	11	20.6	5.14	8.1e-09	13944.3	HOMO SAPIENS	H2BFS_HUMAN Histone H2B type F-S
3692	hIP191-6	hIP191-06	LARP7	[116-5]	0	P58876	5	11	20.6	5.14	8.1e-09	13936.3	HOMO SAPIENS	H2B1D_HUMAN Histone H2B type 1-D
3693	hIP191-6	hIP191-06	LARP7	[116-6]	0	P62807	5	11	20.6	5.14	8.1e-09	13906.3	HOMO SAPIENS	H2B1C_HUMAN Histone H2B type 1-C/E/F/G/I
3694	hIP191-6	hIP191-06	LARP7	[116-7]	0	Q16778	5	11	20.6	5.14	8.1e-09	13920.3	HOMO SAPIENS	H2B2E_HUMAN Histone H2B type 2-E
3695	hIP191-6	hIP191-06	LARP7	[116-8]	0	Q5QNW6	5	11	20.6	5.14	8.1e-09	13920.3	HOMO SAPIENS	H2B2F_HUMAN Histone H2B type 2-F
3696	hIP191-6	hIP191-06	LARP7	[116-9]	0	Q8N257	5	11	20.6	5.14	8.1e-09	13908.2	HOMO SAPIENS	H2B3B_HUMAN Histone H2B type 3-B
3697	hIP191-6	hIP191-06	LARP7	[116-10]	0	Q93079	5	11	20.6	5.14	8.1e-09	13892.2	HOMO SAPIENS	H2B1H_HUMAN Histone H2B type 1-H
3698	hIP191-6	hIP191-06	LARP7	[116-11]	0	Q99877	5	11	20.6	5.14	8.1e-09	13922.3	HOMO SAPIENS	H2B1N_HUMAN Histone H2B type 1-N
3699	hIP191-6	hIP191-06	LARP7	[116-12]	0	Q99879	5	11	20.6	5.14	8.1e-09	13989.4	HOMO SAPIENS	H2B1M_HUMAN Histone H2B type 1-M
3700	hIP191-6	hIP191-06	LARP7	[116-13]	0	Q99880	5	11	20.6	5.14	8.1e-09	13952.3	HOMO SAPIENS	H2B1L_HUMAN Histone H2B type 1-L
3701	hIP191-6	hIP191-06	LARP7	[116-14]	0	Q96A08	2	3	8.7	1.47	0.00023	14167.6	HOMO SAPIENS	H2B1A_HUMAN Histone H2B type 1-A
3702	hIP191-6	hIP191-06	LARP7	[117]		P82673	8	9	33.1	2.85	1.7e-05	36844.6	HOMO SAPIENS	RT35_HUMAN 28S ribosomal protein S35, mitochondrial
3703	hIP191-6	hIP191-06	LARP7	[118]		P55769	6	9	47.7	4.1	8e-07	14173.7	HOMO SAPIENS	NH2L1_HUMAN NHP2-like protein 1
3704	hIP191-6	hIP191-06	LARP7	[119]		O43818	9	10	24.6	3.38	3.1e-07	51841.1	HOMO SAPIENS	U3IP2_HUMAN U3 small nucleolar RNA-interacting protein 2
3705	hIP191-6	hIP191-06	LARP7	[120]		Q8NC51	5	5	18.9	5.46	4.5e-09	44965.7	HOMO SAPIENS	PAIRB_HUMAN Plasminogen activator inhibitor 1 RNA-binding protein
3706	hIP191-6	hIP191-06	LARP7	[121]		O94992	5	5	32.9	5.76	7.8e-10	40623.8	HOMO SAPIENS	HEXI1_HUMAN Protein HEXIM1
3707	hIP191-6	hIP191-06	LARP7	[122]		Q9H6S0	6	6	5.2	4.28	1.2e-07	160250	HOMO SAPIENS	YTDC2_HUMAN Probable ATP-dependent RNA helicase YTHDC2
3708	hIP191-6	hIP191-06	LARP7	[123]		Q00610	8	8	6.6	3.39	1.4e-06	191616	HOMO SAPIENS	CLH1_HUMAN Clathrin heavy chain 1
3709	hIP191-6	hIP191-06	LARP7	[123-1]	0	P53675	1	1	0.7	2.61	0.00016	187032	HOMO SAPIENS	CLH2_HUMAN Clathrin heavy chain 2
3710	hIP191-6	hIP191-06	LARP7	[124]		Q12906	10	11	15.7	2.33	0.0003	95339.2	HOMO SAPIENS	ILF3_HUMAN Interleukin enhancer-binding factor 3
3711	hIP191-6	hIP191-06	LARP7	[124-1]	1	Q96SI9	3	3	4.8	0.39	0.0045	73653.2	HOMO SAPIENS	STRBP_HUMAN Spermatid perinuclear RNA-binding protein
[truncated: 517 more rows]
