# Supplementary material for: The HIV-1 Tat protein recruits a ubiquitin ligase to reorganize the 7SK snRNP for transcriptional activation
Source: eLife journal article supplement (doi:10.7554/elife.31879), 2018-05-30
Supplement: supp [file elife-31879-supp-v1.zip › elife_poa_e31879_Supplementary_File_2.xlsx]

## Sheet: HEXIM1
HEXIM1 Lysine(s)	Sequence	Length	Modifications	Modified sequence	GlyGly (K) Probabilities	Oxidation (M) Probabilities	GlyGly (K) Score Diffs	Oxidation (M) Score Diffs	Acetyl (Protein N-term)	GlyGly (K)	Oxidation (M)	Missed cleavages	Proteins	Leading proteins	Leading razor protein	Type	Raw file	MS/MS m/z	Charge	m/z	Mass	Resolution	Uncalibrated - Calibrated m/z [ppm]	Uncalibrated - Calibrated m/z [Da]	Mass Error [ppm]	Mass Error [Da]	Uncalibrated Mass Error [ppm]	Uncalibrated Mass Error [Da]	Max intensity m/z 0	Retention time	Retention length	Calibrated retention time	Calibrated retention time start	Calibrated retention time finish	Retention time calibration	Match time difference	Match m/z difference	Match q-value	Match score	Number of data points	Number of scans	Number of isotopic peaks	PIF	Fraction of total spectrum	Base peak fraction	PEP	MS/MS Count	MS/MS Scan Number	Score
196, 221	AEMFAKGQPVAPYNTTQFLMDDHDQEEPDLK	31	Unmodified	_AEMFAKGQPVAPYNTTQFLMDDHDQEEPDLK_					0	0	0	1	HEXI1_HUMANProteinHEXIM1	HEXI1_HUMANProteinHEXIM1	HEXI1_HUMANProteinHEXIM1	MULTI-MSMS	FU20160819-07	892.671	4	892.162	3564.62	63163.3	3.0835	0.002751	3.4876	0.0031115	6.5711	0.0058625	892.667	76.041	0.046898	76.041	76.015	76.062	0					9	5	2	0	0	0	0.0056956	1	37209	44.844
	AEMFAKGQPVAPYNTTQFLMDDHDQEEPDLK	31	Unmodified	_AEMFAKGQPVAPYNTTQFLMDDHDQEEPDLK_					0	0	0	1	HEXI1_HUMANProteinHEXIM1	HEXI1_HUMANProteinHEXIM1	HEXI1_HUMANProteinHEXIM1	MULTI-MSMS	FU20160819-07	1189.55	3	1189.21	3564.62	55940.8	2.5502	0.0030328	-0.76508	-0.00090985	1.7852	0.0021229	1189.55	77.906	0.82796	77.906	77.686	78.514	0					489	80	8	0	0	0	6.6442e-74	4	38866	163.09
	AEMFAKGQPVAPYNTTQFLMDDHDQEEPDLK	31	Unmodified	_AEMFAKGQPVAPYNTTQFLMDDHDQEEPDLK_					0	0	0	1	HEXI1_HUMANProteinHEXIM1	HEXI1_HUMANProteinHEXIM1	HEXI1_HUMANProteinHEXIM1	MULTI-MSMS	FU20160819-07	892.665	4	892.162	3564.62	63163.1	2.2159	0.0019769	0.070255	6.2679e-05	2.2861	0.0020396	892.663	77.892	0.92114	77.892	77.593	78.514	-7.6294e-06					731	89	10	0	0	0	1.6447e-49	2	38954	129.37
	AEMFAKGQPVAPYNTTQFLMDDHDQEEPDLK	31	Unmodified	_AEMFAKGQPVAPYNTTQFLMDDHDQEEPDLK_					0	0	0	1	HEXI1_HUMANProteinHEXIM1	HEXI1_HUMANProteinHEXIM1	HEXI1_HUMANProteinHEXIM1	MULTI-MSMS	FU20160819-07	892.414	4	892.162	3564.62	62691.9	1.9469	0.001737	-0.60884	-0.00054318	1.3381	0.0011938	892.662	78.551	0.18954	78.551	78.514	78.703	7.6294e-06					63	20	7	0	0	0	5.2105e-28	1	39640	112.39
	AEMFAKGQPVAPYNTTQFLMDDHDQEEPDLK	31	Unmodified	_AEMFAKGQPVAPYNTTQFLMDDHDQEEPDLK_					0	0	0	1	HEXI1_HUMANProteinHEXIM1	HEXI1_HUMANProteinHEXIM1	HEXI1_HUMANProteinHEXIM1	MSMS	FU20160819-07	1189.22	3	1189.21	3564.62	NaN	NaN	NaN	NaN	NaN	NaN	NaN	NaN	76.917	1	76.917	76.417	77.417	0								0	0	0	0.010186	1	38030	53.525
	AEMFAKGQPVAPYNTTQFLMDDHDQEEPDLK	31	Unmodified	_AEMFAKGQPVAPYNTTQFLMDDHDQEEPDLK_					0	0	0	1	HEXI1_HUMANProteinHEXIM1	HEXI1_HUMANProteinHEXIM1	HEXI1_HUMANProteinHEXIM1	MULTI-MSMS	FU20160819-08	892.913	4	892.162	3564.62	62844.4	2.2603	0.0020166	0.27612	0.00024634	2.5365	0.0022629	892.663	78.076	0.8724	78.076	77.78	78.652	0					481	84	10	0	0	0	3.6432e-28	2	40260	113.68
	AEMFAKGQPVAPYNTTQFLMDDHDQEEPDLK	31	Unmodified	_AEMFAKGQPVAPYNTTQFLMDDHDQEEPDLK_					0	0	0	1	HEXI1_HUMANProteinHEXIM1	HEXI1_HUMANProteinHEXIM1	HEXI1_HUMANProteinHEXIM1	MULTI-MSMS	FU20160819-08	1189.55	3	1189.21	3564.62	55869.1	1.8039	0.0021452	0.9659	0.0011487	2.7697	0.0032938	1189.55	77.888	0.034592	77.888	77.863	77.897	0					5	3	2	0	0	0	8.8532e-22	1	40268	99.753
	AEMFAKGQPVAPYNTTQFLMDDHDQEEPDLK	31	Unmodified	_AEMFAKGQPVAPYNTTQFLMDDHDQEEPDLK_					0	0	0	1	HEXI1_HUMANProteinHEXIM1	HEXI1_HUMANProteinHEXIM1	HEXI1_HUMANProteinHEXIM1	MULTI-MSMS	FU20160819-08	1189.89	3	1189.21	3564.62	55997.3	1.7282	0.0020552	0.4352	0.00051754	2.1634	0.0025727	1189.55	78.076	0.46832	78.076	77.897	78.365	0					251	42	9	0	0	0	1.2612e-33	1	40608	117.15
	AEMFAKGQPVAPYNTTQFLMDDHDQEEPDLK	31	Unmodified	_AEMFAKGQPVAPYNTTQFLMDDHDQEEPDLK_					0	0	0	1	HEXI1_HUMANProteinHEXIM1	HEXI1_HUMANProteinHEXIM1	HEXI1_HUMANProteinHEXIM1	MULTI-MSMS	FU20160819-08	892.665	4	892.162	3564.62	63137.6	2.1659	0.0019323	0.53459	0.00047694	2.7005	0.0024093	892.664	78.397	0.16698	78.397	78.358	78.525	0					66	18	4	0	0	0	1.1396e-10	1	40819	66.98
	AEMFAKGQPVAPYNTTQFLMDDHDQEEPDLK	31	Unmodified	_AEMFAKGQPVAPYNTTQFLMDDHDQEEPDLK_					0	0	0	1	HEXI1_HUMANProteinHEXIM1	HEXI1_HUMANProteinHEXIM1	HEXI1_HUMANProteinHEXIM1	MULTI-MSMS	FU20160819-08	892.415	4	892.162	3564.62	60326.7	1.9099	0.0017039	-1.5963	-0.0014242	0.31358	0.00027977	892.661	79.213	0.070099	79.213	79.165	79.235	0					9	8	2	0	0	0	8.4432e-19	1	41486	89.434
	AEMFAKGQPVAPYNTTQFLMDDHDQEEPDLK	31	Unmodified	_AEMFAKGQPVAPYNTTQFLMDDHDQEEPDLK_					0	0	0	1	HEXI1_HUMANProteinHEXIM1	HEXI1_HUMANProteinHEXIM1	HEXI1_HUMANProteinHEXIM1	MULTI-SECPEP	FU20160819-08	713.934	5	713.931	3564.62	72200.9	1.9573	0.0013974	1.0262	0.00073265	2.9835	0.00213	714.533	78.075	0.21481	78.075	78.045	78.26	0					29	19	4	0	0	0	2.7046e-05	1	40612	80.355
196, 221,227	AEMFAKGQPVAPYNTTQFLMDDHDQEEPDLKTGLYSK	37	Unmodified	_AEMFAKGQPVAPYNTTQFLMDDHDQEEPDLKTGLYSK_					0	0	0	2	HEXI1_HUMANProteinHEXIM1	HEXI1_HUMANProteinHEXIM1	HEXI1_HUMANProteinHEXIM1	MULTI-MSMS	FU20160819-07	1054.75	4	1054.5	4213.96	59591.5	2.0239	0.0021342	0.067769	7.1462e-05	2.0917	0.0022057	1055.25	78.755	0.4512	78.755	78.514	78.965	0					205	51	6	0	0	0	3.9795e-40	2	39824	116.64
	AEMFAKGQPVAPYNTTQFLMDDHDQEEPDLKTGLYSK	37	Unmodified	_AEMFAKGQPVAPYNTTQFLMDDHDQEEPDLKTGLYSK_					0	0	0	2	HEXI1_HUMANProteinHEXIM1	HEXI1_HUMANProteinHEXIM1	HEXI1_HUMANProteinHEXIM1	MULTI-MSMS	FU20160819-07	844.002	5	843.8	4213.96	64941.3	2.099	0.0017712	0.23051	0.0001945	2.3296	0.0019657	844.201	78.795	0.82022	78.795	78.514	79.334	0					380	96	7	0	0	0	2.1308e-14	2	39881	63.74
	AEMFAKGQPVAPYNTTQFLMDDHDQEEPDLKTGLYSK	37	Unmodified	_AEMFAKGQPVAPYNTTQFLMDDHDQEEPDLKTGLYSK_					0	0	0	2	HEXI1_HUMANProteinHEXIM1	HEXI1_HUMANProteinHEXIM1	HEXI1_HUMANProteinHEXIM1	MULTI-MSMS	FU20160819-07	844.202	5	843.8	4213.96	64073.7	1.7578	0.0014833	0.23109	0.00019499	1.9889	0.0016782	844.201	79.531	0.15725	79.531	79.491	79.648	0					18	16	2	0	0	0	0.0003549	1	40455	47.191
	AEMFAKGQPVAPYNTTQFLMDDHDQEEPDLKTGLYSK	37	Unmodified	_AEMFAKGQPVAPYNTTQFLMDDHDQEEPDLKTGLYSK_					0	0	0	2	HEXI1_HUMANProteinHEXIM1	HEXI1_HUMANProteinHEXIM1	HEXI1_HUMANProteinHEXIM1	MULTI-MSMS	FU20160819-07	844.402	5	843.8	4213.96	67681	1.6916	0.0014274	-0.071939	-6.0702e-05	1.6197	0.0013667	844.201	79.706	0.10388	79.706	79.648	79.752	0					15	11	2	0	0	0	0.00029189	1	40606	47.967
	AEMFAKGQPVAPYNTTQFLMDDHDQEEPDLKTGLYSK	37	Unmodified	_AEMFAKGQPVAPYNTTQFLMDDHDQEEPDLKTGLYSK_					0	0	0	2	HEXI1_HUMANProteinHEXIM1	HEXI1_HUMANProteinHEXIM1	HEXI1_HUMANProteinHEXIM1	MULTI-MSMS	FU20160819-08	1055.25	4	1054.5	4213.96	59780.4	1.7206	0.0018144	0.86137	0.00090831	2.582	0.0027227	1055	78.92	0.3264	78.92	78.73	79.056	0					116	33	6	0	0	0	8.429e-28	2	41103	97.106
	AEMFAKGQPVAPYNTTQFLMDDHDQEEPDLKTGLYSK	37	Unmodified	_AEMFAKGQPVAPYNTTQFLMDDHDQEEPDLKTGLYSK_					0	0	0	2	HEXI1_HUMANProteinHEXIM1	HEXI1_HUMANProteinHEXIM1	HEXI1_HUMANProteinHEXIM1	MULTI-MSMS	FU20160819-08	844.204	5	843.8	4213.96	65000.7	1.3781	0.0011629	1.1339	0.00095682	2.5121	0.0021197	844.202	79.109	0.37556	79.109	78.989	79.365	0					79	43	3	0	0	0	5.6474e-21	1	41378	71.105
	AEMFAKGQPVAPYNTTQFLMDDHDQEEPDLKTGLYSK	37	Unmodified	_AEMFAKGQPVAPYNTTQFLMDDHDQEEPDLKTGLYSK_					0	0	0	2	HEXI1_HUMANProteinHEXIM1	HEXI1_HUMANProteinHEXIM1	HEXI1_HUMANProteinHEXIM1	MULTI-SECPEP	FU20160819-08	843.803	5	843.8	4213.96	64770.2	1.3359	0.0011272	1.008	0.00085056	2.3439	0.0019778	844.402	79.192	0.23503	79.192	79.155	79.39	0					33	27	2	0	0	0	0.016109	1	41470	35.689
	AEMFAKGQPVAPYNTTQFLMDDHDQEEPDLKTGLYSK	37	Unmodified	_AEMFAKGQPVAPYNTTQFLMDDHDQEEPDLKTGLYSK_					0	0	0	2	HEXI1_HUMANProteinHEXIM1	HEXI1_HUMANProteinHEXIM1	HEXI1_HUMANProteinHEXIM1	MULTI-SECPEP	FU20160819-08	1054.71	4	1054.5	4213.96	58412.8	1.7775	0.0018743	2.3458	0.0024736	4.1233	0.004348	1055	78.719	0.070389	78.719	78.652	78.722	0					9	5	2	0	0	0	4.6993e-18	1	41051	89.221
	AEMFAKGQPVAPYNTTQFLMDDHDQEEPDLKTGLYSKR	38	Unmodified	_AEMFAKGQPVAPYNTTQFLMDDHDQEEPDLKTGLYSKR_					0	0	0	3	HEXI1_HUMANProteinHEXIM1	HEXI1_HUMANProteinHEXIM1	HEXI1_HUMANProteinHEXIM1	MULTI-MSMS	FU20160819-07	729.854	6	729.351	4370.06	66110.2	1.8522	0.0013509	0.93177	0.00067959	2.784	0.0020305	729.853	73.661	0.052963	73.661	73.641	73.694	0					7	4	2	0	0	0	0.0072063	1	35465	34.988
	AEMFAKGQPVAPYNTTQFLMDDHDQEEPDLKTGLYSKR	38	Unmodified	_AEMFAKGQPVAPYNTTQFLMDDHDQEEPDLKTGLYSKR_					0	0	0	3	HEXI1_HUMANProteinHEXIM1	HEXI1_HUMANProteinHEXIM1	HEXI1_HUMANProteinHEXIM1	MULTI-MSMS	FU20160819-07	875.424	5	875.02	4370.06	63057	3.9686	0.0034726	-1.2805	-0.0011204	2.6881	0.0023522	875.42	73.832	0.19717	73.832	73.711	73.908	0					54	19	5	0	0	0	0.0026044	1	35608	38.853
	AEMFAKGQPVAPYNTTQFLMDDHDQEEPDLKTGLYSKR	38	Unmodified	_AEMFAKGQPVAPYNTTQFLMDDHDQEEPDLKTGLYSKR_					0	0	0	3	HEXI1_HUMANProteinHEXIM1	HEXI1_HUMANProteinHEXIM1	HEXI1_HUMANProteinHEXIM1	MULTI-MSMS	FU20160819-07	729.687	6	729.351	4370.06	68834.5	1.5617	0.001139	1.362	0.0009934	2.9238	0.0021324	729.686	74.341	3.4015	74.341	73.745	77.147	0					1754	395	5	0	0	0	3.5201e-38	10	37111	111.24
	AEMFAKGQPVAPYNTTQFLMDDHDQEEPDLKTGLYSKR	38	Unmodified	_AEMFAKGQPVAPYNTTQFLMDDHDQEEPDLKTGLYSKR_					0	0	0	3	HEXI1_HUMANProteinHEXIM1	HEXI1_HUMANProteinHEXIM1	HEXI1_HUMANProteinHEXIM1	MULTI-MSMS	FU20160819-07	625.733	7	625.302	4370.06	74090	4.2518	0.0026587	-1.5794	-0.00098761	2.6724	0.0016711	625.587	74.404	0.45815	74.404	74.163	74.621	-7.6294e-06					270	55	8	0	0	0	0.00010784	3	36227	47.695
	AEMFAKGQPVAPYNTTQFLMDDHDQEEPDLKTGLYSKR	38	Unmodified	_AEMFAKGQPVAPYNTTQFLMDDHDQEEPDLKTGLYSKR_					0	0	0	3	HEXI1_HUMANProteinHEXIM1	HEXI1_HUMANProteinHEXIM1	HEXI1_HUMANProteinHEXIM1	MULTI-MSMS	FU20160819-07	1458.03	3	1457.69	4370.06	51012.5	4.2059	0.0061309	-2.1827	-0.0031817	2.0232	0.0029492	1458.69	74.389	0.37525	74.389	74.193	74.568	0					122	45	4	0	0	0	1.1923e-13	1	36040	64.936
	AEMFAKGQPVAPYNTTQFLMDDHDQEEPDLKTGLYSKR	38	Unmodified	_AEMFAKGQPVAPYNTTQFLMDDHDQEEPDLKTGLYSKR_					0	0	0	3	HEXI1_HUMANProteinHEXIM1	HEXI1_HUMANProteinHEXIM1	HEXI1_HUMANProteinHEXIM1	MULTI-MSMS	FU20160819-07	1094.03	4	1093.52	4370.06	57355.3	4.0807	0.0044623	-2.0271	-0.0022167	2.0536	0.0022456	1094.02	74.351	0.26382	74.351	74.106	74.369	0					56	29	2	0	0	0	3.3561e-33	1	36133	107.17
	AEMFAKGQPVAPYNTTQFLMDDHDQEEPDLKTGLYSKR	38	Unmodified	_AEMFAKGQPVAPYNTTQFLMDDHDQEEPDLKTGLYSKR_					0	0	0	3	HEXI1_HUMANProteinHEXIM1	HEXI1_HUMANProteinHEXIM1	HEXI1_HUMANProteinHEXIM1	MULTI-MSMS	FU20160819-07	1094.03	4	1093.52	4370.06	57556.5	3.8838	0.004247	-2.009	-0.0021969	1.8748	0.0020502	1094.02	74.715	0.50761	74.715	74.484	74.991	-7.6294e-06					374	65	9	0	0	0	8.6113e-10	2	36332	61.811
	AEMFAKGQPVAPYNTTQFLMDDHDQEEPDLKTGLYSKR	38	Unmodified	_AEMFAKGQPVAPYNTTQFLMDDHDQEEPDLKTGLYSKR_					0	0	0	3	HEXI1_HUMANProteinHEXIM1	HEXI1_HUMANProteinHEXIM1	HEXI1_HUMANProteinHEXIM1	MULTI-MSMS	FU20160819-07	1458.37	3	1457.69	4370.06	51552.8	4.0511	0.0059053	-2.129	-0.0031034	1.9222	0.002802	1458.36	74.715	0.37335	74.715	74.568	74.941	0					126	48	4	0	0	0	2.7774e-25	1	36459	75.727
	AEMFAKGQPVAPYNTTQFLMDDHDQEEPDLKTGLYSKR	38	Unmodified	_AEMFAKGQPVAPYNTTQFLMDDHDQEEPDLKTGLYSKR_					0	0	0	3	HEXI1_HUMANProteinHEXIM1	HEXI1_HUMANProteinHEXIM1	HEXI1_HUMANProteinHEXIM1	MULTI-MSMS	FU20160819-07	1094.03	4	1093.52	4370.06	57482.6	3.6337	0.0039735	-1.6205	-0.0017721	2.0132	0.0022014	1094.02	75.147	0.99935	75.147	74.941	75.941	0					648	125	8	0	0	0	1.8114e-26	3	36535	80.022
	AEMFAKGQPVAPYNTTQFLMDDHDQEEPDLKTGLYSKR	38	Unmodified	_AEMFAKGQPVAPYNTTQFLMDDHDQEEPDLKTGLYSKR_					0	0	0	3	HEXI1_HUMANProteinHEXIM1	HEXI1_HUMANProteinHEXIM1	HEXI1_HUMANProteinHEXIM1	MULTI-MSMS	FU20160819-07	625.447	7	625.302	4370.06	73407.6	3.7509	0.0023455	-1.0787	-0.00067452	2.6722	0.0016709	625.588	75.522	0.20674	75.522	75.427	75.634	0					56	26	3	0	0	0	5.097e-15	1	36922	65.349
	AEMFAKGQPVAPYNTTQFLMDDHDQEEPDLKTGLYSKR	38	Unmodified	_AEMFAKGQPVAPYNTTQFLMDDHDQEEPDLKTGLYSKR_					0	0	0	3	HEXI1_HUMANProteinHEXIM1	HEXI1_HUMANProteinHEXIM1	HEXI1_HUMANProteinHEXIM1	MULTI-MSMS	FU20160819-07	625.733	7	625.302	4370.06	73717.8	3.5366	0.0022114	-1.0076	-0.00063007	2.529	0.0015814	625.731	75.978	0.29593	75.978	75.829	76.125	0					93	36	5	0	0	0	0.011461	1	37197	31.6
	AEMFAKGQPVAPYNTTQFLMDDHDQEEPDLKTGLYSKR	38	Unmodified	_AEMFAKGQPVAPYNTTQFLMDDHDQEEPDLKTGLYSKR_					0	0	0	3	HEXI1_HUMANProteinHEXIM1	HEXI1_HUMANProteinHEXIM1	HEXI1_HUMANProteinHEXIM1	MULTI-MSMS	FU20160819-07	1094.03	4	1093.52	4370.06	57556.6	3.2076	0.0035076	-1.0715	-0.0011718	2.1361	0.0023359	1094.02	76.205	1.1585	76.205	75.941	77.099	-7.6294e-06					502	123	9	0	0	0	5.5568e-33	1	37507	104.83
	AEMFAKGQPVAPYNTTQFLMDDHDQEEPDLKTGLYSKR	38	Unmodified	_AEMFAKGQPVAPYNTTQFLMDDHDQEEPDLKTGLYSKR_					0	0	0	3	HEXI1_HUMANProteinHEXIM1	HEXI1_HUMANProteinHEXIM1	HEXI1_HUMANProteinHEXIM1	MULTI-MSMS	FU20160819-07	875.222	5	875.02	4370.06	63053.1	2.5324	0.0022159	-2.7801	-0.0024326	-0.24765	-0.0002167	875.419	77.353	0.83443	77.353	77.111	77.945	0					598	82	9	0	0	0	7.3779e-27	3	38436	90.447
	AEMFAKGQPVAPYNTTQFLMDDHDQEEPDLKTGLYSKR	38	Unmodified	_AEMFAKGQPVAPYNTTQFLMDDHDQEEPDLKTGLYSKR_					0	0	0	3	HEXI1_HUMANProteinHEXIM1	HEXI1_HUMANProteinHEXIM1	HEXI1_HUMANProteinHEXIM1	MULTI-MSMS	FU20160819-07	729.851	6	729.351	4370.06	69003.4	0.48433	0.00035324	-0.39855	-0.00029068	0.085779	6.2563e-05	729.852	77.36	0.83443	77.36	77.111	77.945	0					629	82	10	0	0	0	1.493e-06	2	38697	54.189
	AEMFAKGQPVAPYNTTQFLMDDHDQEEPDLKTGLYSKR	38	Unmodified	_AEMFAKGQPVAPYNTTQFLMDDHDQEEPDLKTGLYSKR_					0	0	0	3	HEXI1_HUMANProteinHEXIM1	HEXI1_HUMANProteinHEXIM1	HEXI1_HUMANProteinHEXIM1	MULTI-MSMS	FU20160819-07	730.02	6	729.351	4370.06	69126.8	0.23135	0.00016874	1.0417	0.00075975	1.273	0.00092848	729.519	78.056	0.30717	78.056	77.896	78.203	0					113	32	5	0	0	0	9.9943e-05	1	39068	48.76
	AEMFAKGQPVAPYNTTQFLMDDHDQEEPDLKTGLYSKR	38	Unmodified	_AEMFAKGQPVAPYNTTQFLMDDHDQEEPDLKTGLYSKR_					0	0	0	3	HEXI1_HUMANProteinHEXIM1	HEXI1_HUMANProteinHEXIM1	HEXI1_HUMANProteinHEXIM1	MULTI-MSMS	FU20160819-07	729.687	6	729.351	4370.06	69126.8	0.10487	7.6486e-05	1.4905	0.0010871	1.5954	0.0011636	729.854	78.332	0.49182	78.332	78.111	78.603	0					204	46	7	0	0	0	1.3793e-07	3	39396	57.113
	AEMFAKGQPVAPYNTTQFLMDDHDQEEPDLKTGLYSKR	38	Unmodified	_AEMFAKGQPVAPYNTTQFLMDDHDQEEPDLKTGLYSKR_					0	0	0	3	HEXI1_HUMANProteinHEXIM1	HEXI1_HUMANProteinHEXIM1	HEXI1_HUMANProteinHEXIM1	MULTI-MSMS	FU20160819-07	875.022	5	875.02	4370.06	65731.3	1.2406	0.0010855	-0.40361	-0.00035316	0.83699	0.00073238	875.42	80.397	0.31947	80.397	80.136	80.455	0					39	28	3	0	0	0	1.2139e-06	2	41278	54.899
	AEMFAKGQPVAPYNTTQFLMDDHDQEEPDLKTGLYSKR	38	Unmodified	_AEMFAKGQPVAPYNTTQFLMDDHDQEEPDLKTGLYSKR_					0	0	0	3	HEXI1_HUMANProteinHEXIM1	HEXI1_HUMANProteinHEXIM1	HEXI1_HUMANProteinHEXIM1	MULTI-MSMS	FU20160819-07	875.424	5	875.02	4370.06	67743.1	1.228	0.0010745	0.65907	0.0005767	1.8871	0.0016512	875.422	80.918	0.12904	80.918	80.86	80.989	0					22	13	2	0	0	0	0.00047107	2	41784	44.503
	AEMFAKGQPVAPYNTTQFLMDDHDQEEPDLKTGLYSKR	38	Unmodified	_AEMFAKGQPVAPYNTTQFLMDDHDQEEPDLKTGLYSKR_					0	0	0	3	HEXI1_HUMANProteinHEXIM1	HEXI1_HUMANProteinHEXIM1	HEXI1_HUMANProteinHEXIM1	MULTI-MSMS	FU20160819-07	729.521	6	729.351	4370.06	66144.6	0.42933	0.00031314	2.1324	0.0015553	2.5618	0.0018684	729.687	95.246	0.064621	95.246	95.216	95.281	-7.6294e-06					9	5	2	0	0	0	0.023516	1	54986	28.438
	AEMFAKGQPVAPYNTTQFLMDDHDQEEPDLKTGLYSKR	38	Unmodified	_AEMFAKGQPVAPYNTTQFLMDDHDQEEPDLKTGLYSKR_					0	0	0	3	HEXI1_HUMANProteinHEXIM1	HEXI1_HUMANProteinHEXIM1	HEXI1_HUMANProteinHEXIM1	MULTI-MSMS	FU20160819-07	729.521	6	729.351	4370.06	71225.2	0.39935	0.00029127	2.3616	0.0017224	2.7609	0.0020137	729.52	119.18	0.17163	119.18	119.06	119.23	7.6294e-06					29	19	3	0	0	0	0.032265	1	75349	24.802
	AEMFAKGQPVAPYNTTQFLMDDHDQEEPDLKTGLYSKR	38	Unmodified	_AEMFAKGQPVAPYNTTQFLMDDHDQEEPDLKTGLYSKR_					0	0	0	3	HEXI1_HUMANProteinHEXIM1	HEXI1_HUMANProteinHEXIM1	HEXI1_HUMANProteinHEXIM1	MULTI-SECPEP	FU20160819-07	625.734	7	625.302	4370.06	73717.7	4.113	0.0025719	-1.6116	-0.0010077	2.5014	0.0015641	625.588	74.715	0.43938	74.715	74.56	75	0					140	56	5	0	0	0	0.00020257	1	36429	61.811
	AEMFAKGQPVAPYNTTQFLMDDHDQEEPDLKTGLYSKR	38	Unmodified	_AEMFAKGQPVAPYNTTQFLMDDHDQEEPDLKTGLYSKR_					0	0	0	3	HEXI1_HUMANProteinHEXIM1	HEXI1_HUMANProteinHEXIM1	HEXI1_HUMANProteinHEXIM1	MULTI-SECPEP	FU20160819-07	626.02	7	625.302	4370.06	73562.4	3.3628	0.0021028	-0.37887	-0.00023691	2.984	0.0018659	625.731	76.379	0.2438	76.379	76.286	76.529	0					71	25	4	0	0	0	0.028663	1	37451	28.276
	AEMFAKGQPVAPYNTTQFLMDDHDQEEPDLKTGLYSKR	38	Unmodified	_AEMFAKGQPVAPYNTTQFLMDDHDQEEPDLKTGLYSKR_					0	0	0	3	HEXI1_HUMANProteinHEXIM1	HEXI1_HUMANProteinHEXIM1	HEXI1_HUMANProteinHEXIM1	MULTI-SECPEP	FU20160819-07	625.876	7	625.302	4370.06	73562.4	3.6521	0.0022837	-0.79233	-0.00049544	2.8598	0.0017882	625.588	75.799	0.37042	75.799	75.57	75.941	0					113	46	4	0	0	0	0.0013841	1	36916	41.081
	AEMFAKGQPVAPYNTTQFLMDDHDQEEPDLKTGLYSKR	38	Unmodified	_AEMFAKGQPVAPYNTTQFLMDDHDQEEPDLKTGLYSKR_					0	0	0	3	HEXI1_HUMANProteinHEXIM1	HEXI1_HUMANProteinHEXIM1	HEXI1_HUMANProteinHEXIM1	MULTI-SECPEP	FU20160819-07	626.017	7	625.302	4370.06	73406.7	3.1991	0.0020004	-3.4366	-0.0021489	-0.23747	-0.00014849	625.586	76.794	0.21339	76.794	76.65	76.863	0					30	19	2	0	0	0	6.1774e-06	1	37884	56.648
	AEMFAKGQPVAPYNTTQFLMDDHDQEEPDLKTGLYSKR	38	Unmodified	_AEMFAKGQPVAPYNTTQFLMDDHDQEEPDLKTGLYSKR_					0	0	0	3	HEXI1_HUMANProteinHEXIM1	HEXI1_HUMANProteinHEXIM1	HEXI1_HUMANProteinHEXIM1	MULTI-SECPEP	FU20160819-07	729.687	6	729.351	4370.06	70080.7	-0.70677	-0.00051549	3.033	0.0022122	2.3263	0.0016967	729.688	80.122	0.40872	80.122	80.002	80.411	0					47	36	2	0	0	0	2.7394e-12	1	41304	86.022
	AEMFAKGQPVAPYNTTQFLMDDHDQEEPDLKTGLYSKR	38	Unmodified	_AEMFAKGQPVAPYNTTQFLMDDHDQEEPDLKTGLYSKR_					0	0	0	3	HEXI1_HUMANProteinHEXIM1	HEXI1_HUMANProteinHEXIM1	HEXI1_HUMANProteinHEXIM1	MULTI-MSMS	FU20160819-08	729.521	6	729.351	4370.06	68395.9	2.5373	0.0018506	0.83774	0.00061101	3.375	0.0024616	729.853	74.108	0.14691	74.108	74.005	74.152	-7.6294e-06					35	14	5	0	0	0	0.020008	1	37076	29.691
	AEMFAKGQPVAPYNTTQFLMDDHDQEEPDLKTGLYSKR	38	Unmodified	_AEMFAKGQPVAPYNTTQFLMDDHDQEEPDLKTGLYSKR_					0	0	0	3	HEXI1_HUMANProteinHEXIM1	HEXI1_HUMANProteinHEXIM1	HEXI1_HUMANProteinHEXIM1	MULTI-MSMS	FU20160819-08	875.423	5	875.02	4370.06	63115.3	3.2055	0.0028049	-0.8672	-0.00075882	2.3383	0.0020461	875.42	74.674	0.67165	74.674	74.066	74.738	0					483	68	10	0	0	0	0.0092299	2	37537	33.677
	AEMFAKGQPVAPYNTTQFLMDDHDQEEPDLKTGLYSKR	38	Unmodified	_AEMFAKGQPVAPYNTTQFLMDDHDQEEPDLKTGLYSKR_					0	0	0	3	HEXI1_HUMANProteinHEXIM1	HEXI1_HUMANProteinHEXIM1	HEXI1_HUMANProteinHEXIM1	MULTI-MSMS	FU20160819-08	729.687	6	729.351	4370.06	68897	2.3701	0.0017286	0.67405	0.00049162	3.0441	0.0022202	729.686	74.672	0.5787	74.672	74.152	74.731	0					458	59	10	0	0	0	0.011613	1	37425	32.69
	AEMFAKGQPVAPYNTTQFLMDDHDQEEPDLKTGLYSKR	38	Unmodified	_AEMFAKGQPVAPYNTTQFLMDDHDQEEPDLKTGLYSKR_					0	0	0	3	HEXI1_HUMANProteinHEXIM1	HEXI1_HUMANProteinHEXIM1	HEXI1_HUMANProteinHEXIM1	MULTI-MSMS	FU20160819-08	1093.78	4	1093.52	4370.06	57477.9	3.0601	0.0033463	-0.83834	-0.00091675	2.2218	0.0024296	1094.02	74.562	0.27934	74.562	74.327	74.606	0					165	28	7	0	0	0	3.1058e-64	1	37430	139.22
	AEMFAKGQPVAPYNTTQFLMDDHDQEEPDLKTGLYSKR	38	Unmodified	_AEMFAKGQPVAPYNTTQFLMDDHDQEEPDLKTGLYSKR_					0	0	0	3	HEXI1_HUMANProteinHEXIM1	HEXI1_HUMANProteinHEXIM1	HEXI1_HUMANProteinHEXIM1	MULTI-MSMS	FU20160819-08	625.877	7	625.302	4370.06	73422.6	3.4661	0.0021674	-0.46903	-0.00029328	2.9971	0.0018741	625.588	74.663	0.21146	74.663	74.526	74.738	0					93	24	6	0	0	0	2.1485e-15	1	37594	67.61
	AEMFAKGQPVAPYNTTQFLMDDHDQEEPDLKTGLYSKR	38	Unmodified	_AEMFAKGQPVAPYNTTQFLMDDHDQEEPDLKTGLYSKR_					0	0	0	3	HEXI1_HUMANProteinHEXIM1	HEXI1_HUMANProteinHEXIM1	HEXI1_HUMANProteinHEXIM1	MULTI-MSMS	FU20160819-08	1094.28	4	1093.52	4370.06	57477.9	2.9824	0.0032614	-0.48334	-0.00052854	2.4991	0.0027328	1094.02	74.778	0.096825	74.778	74.731	74.827	0					69	10	9	0	0	0	2.9647e-26	1	37698	84.47
	AEMFAKGQPVAPYNTTQFLMDDHDQEEPDLKTGLYSKR	38	Unmodified	_AEMFAKGQPVAPYNTTQFLMDDHDQEEPDLKTGLYSKR_					0	0	0	3	HEXI1_HUMANProteinHEXIM1	HEXI1_HUMANProteinHEXIM1	HEXI1_HUMANProteinHEXIM1	MULTI-MSMS	FU20160819-08	875.423	5	875.02	4370.06	63115.3	3.1117	0.0027228	-0.7644	-0.00066887	2.3473	0.0020539	875.42	74.857	0.16206	74.857	74.811	74.973	0					174	19	10	0	0	0	1.1284e-26	1	37753	88.938
	AEMFAKGQPVAPYNTTQFLMDDHDQEEPDLKTGLYSKR	38	Unmodified	_AEMFAKGQPVAPYNTTQFLMDDHDQEEPDLKTGLYSKR_					0	0	0	3	HEXI1_HUMANProteinHEXIM1	HEXI1_HUMANProteinHEXIM1	HEXI1_HUMANProteinHEXIM1	MULTI-MSMS	FU20160819-08	1458.7	3	1457.69	4370.06	49101.1	2.7647	0.0040301	-0.16022	-0.00023355	2.6045	0.0037966	1458.7	74.905	0.031921	74.905	74.887	74.919	0					16	3	6	0	0	0	1.6388e-14	1	37761	68.664
	AEMFAKGQPVAPYNTTQFLMDDHDQEEPDLKTGLYSKR	38	Unmodified	_AEMFAKGQPVAPYNTTQFLMDDHDQEEPDLKTGLYSKR_					0	0	0	3	HEXI1_HUMANProteinHEXIM1	HEXI1_HUMANProteinHEXIM1	HEXI1_HUMANProteinHEXIM1	MULTI-MSMS	FU20160819-08	729.687	6	729.351	4370.06	68893.6	2.2047	0.001608	0.51989	0.00037918	2.7246	0.0019872	729.686	75.113	0.24251	75.113	74.973	75.215	-7.6294e-06					249	26	12	0	0	0	2.6396e-06	1	37939	51.715
	AEMFAKGQPVAPYNTTQFLMDDHDQEEPDLKTGLYSKR	38	Unmodified	_AEMFAKGQPVAPYNTTQFLMDDHDQEEPDLKTGLYSKR_					0	0	0	3	HEXI1_HUMANProteinHEXIM1	HEXI1_HUMANProteinHEXIM1	HEXI1_HUMANProteinHEXIM1	MULTI-MSMS	FU20160819-08	1094.03	4	1093.52	4370.06	57477.9	2.8757	0.0031446	-0.84595	-0.00092507	2.0298	0.0022196	1094.02	75.164	0.23417	75.164	74.973	75.207	0					154	25	7	0	0	0	2.4832e-09	1	37945	58.943
	AEMFAKGQPVAPYNTTQFLMDDHDQEEPDLKTGLYSKR	38	Unmodified	_AEMFAKGQPVAPYNTTQFLMDDHDQEEPDLKTGLYSKR_					0	0	0	3	HEXI1_HUMANProteinHEXIM1	HEXI1_HUMANProteinHEXIM1	HEXI1_HUMANProteinHEXIM1	MULTI-MSMS	FU20160819-08	875.422	5	875.02	4370.06	63115.3	2.9743	0.0026026	-0.70668	-0.00061836	2.2677	0.0019843	875.42	75.29	0.20399	75.29	75.207	75.411	-7.6294e-06					182	20	10	0	0	0	0.00032336	1	38024	45.132
	AEMFAKGQPVAPYNTTQFLMDDHDQEEPDLKTGLYSKR	38	Unmodified	_AEMFAKGQPVAPYNTTQFLMDDHDQEEPDLKTGLYSKR_					0	0	0	3	HEXI1_HUMANProteinHEXIM1	HEXI1_HUMANProteinHEXIM1	HEXI1_HUMANProteinHEXIM1	MULTI-MSMS	FU20160819-08	625.59	7	625.302	4370.06	72806	3.258	0.0020372	-0.0609	-3.8081e-05	3.1971	0.0019991	625.732	75.29	0.19565	75.29	75.215	75.411	7.6294e-06					65	19	5	0	0	0	5.9179e-07	1	38088	55.777
	AEMFAKGQPVAPYNTTQFLMDDHDQEEPDLKTGLYSKR	38	Unmodified	_AEMFAKGQPVAPYNTTQFLMDDHDQEEPDLKTGLYSKR_					0	0	0	3	HEXI1_HUMANProteinHEXIM1	HEXI1_HUMANProteinHEXIM1	HEXI1_HUMANProteinHEXIM1	MULTI-MSMS	FU20160819-08	729.687	6	729.351	4370.06	68970.2	2.0937	0.0015271	0.55939	0.00040799	2.6531	0.0019351	729.686	75.465	0.094269	75.465	75.396	75.49	0					47	11	5	0	0	0	0.00020747	1	38187	45.748
	AEMFAKGQPVAPYNTTQFLMDDHDQEEPDLKTGLYSKR	38	Unmodified	_AEMFAKGQPVAPYNTTQFLMDDHDQEEPDLKTGLYSKR_					0	0	0	3	HEXI1_HUMANProteinHEXIM1	HEXI1_HUMANProteinHEXIM1	HEXI1_HUMANProteinHEXIM1	MULTI-MSMS	FU20160819-08	625.591	7	625.302	4370.06	72969.2	3.1163	0.0019486	-0.37773	-0.00023619	2.7386	0.0017124	625.588	75.774	0.30407	75.774	75.577	75.882	0					87	33	4	0	0	0	0.00053264	1	38358	43.483
	AEMFAKGQPVAPYNTTQFLMDDHDQEEPDLKTGLYSKR	38	Unmodified	_AEMFAKGQPVAPYNTTQFLMDDHDQEEPDLKTGLYSKR_					0	0	0	3	HEXI1_HUMANProteinHEXIM1	HEXI1_HUMANProteinHEXIM1	HEXI1_HUMANProteinHEXIM1	MULTI-MSMS	FU20160819-08	729.688	6	729.351	4370.06	68935.2	1.9862	0.0014486	0.70531	0.00051442	2.6915	0.001963	729.686	75.812	0.24062	75.812	75.66	75.9	0					173	25	10	0	0	0	1.3423e-06	1	38430	54.514
	AEMFAKGQPVAPYNTTQFLMDDHDQEEPDLKTGLYSKR	38	Unmodified	_AEMFAKGQPVAPYNTTQFLMDDHDQEEPDLKTGLYSKR_					0	0	0	3	HEXI1_HUMANProteinHEXIM1	HEXI1_HUMANProteinHEXIM1	HEXI1_HUMANProteinHEXIM1	MULTI-MSMS	FU20160819-08	1094.03	4	1093.52	4370.06	57477.9	2.6641	0.0029133	-0.61734	-0.00067507	2.0468	0.0022382	1094.02	75.765	0.25891	75.765	75.593	75.852	0					93	27	5	0	0	0	1.3225e-63	1	38444	135.52
	AEMFAKGQPVAPYNTTQFLMDDHDQEEPDLKTGLYSKR	38	Unmodified	_AEMFAKGQPVAPYNTTQFLMDDHDQEEPDLKTGLYSKR_					0	0	0	3	HEXI1_HUMANProteinHEXIM1	HEXI1_HUMANProteinHEXIM1	HEXI1_HUMANProteinHEXIM1	MULTI-MSMS	FU20160819-08	875.422	5	875.02	4370.06	63071.9	2.7799	0.0024325	-0.76336	-0.00066795	2.0166	0.0017646	875.42	75.886	0.13031	75.886	75.852	75.982	0					118	15	9	0	0	0	2.1689e-15	1	38499	68.011
	AEMFAKGQPVAPYNTTQFLMDDHDQEEPDLKTGLYSKR	38	Unmodified	_AEMFAKGQPVAPYNTTQFLMDDHDQEEPDLKTGLYSKR_					0	0	0	3	HEXI1_HUMANProteinHEXIM1	HEXI1_HUMANProteinHEXIM1	HEXI1_HUMANProteinHEXIM1	MULTI-MSMS	FU20160819-08	729.687	6	729.351	4370.06	68935.2	1.8881	0.0013771	0.77166	0.00056281	2.6598	0.0019399	729.686	76.022	0.32722	76.022	75.916	76.243	0					220	35	10	0	0	0	0.0088505	1	38678	33.677
	AEMFAKGQPVAPYNTTQFLMDDHDQEEPDLKTGLYSKR	38	Unmodified	_AEMFAKGQPVAPYNTTQFLMDDHDQEEPDLKTGLYSKR_					0	0	0	3	HEXI1_HUMANProteinHEXIM1	HEXI1_HUMANProteinHEXIM1	HEXI1_HUMANProteinHEXIM1	MULTI-MSMS	FU20160819-08	1094.28	4	1093.52	4370.06	57477.8	2.5299	0.0027665	-1.6285	-0.0017808	0.90144	0.00098575	1094.27	76.176	0.061157	76.176	76.144	76.205	0					19	7	3	0	0	0	3.9282e-44	1	38682	116.96
	AEMFAKGQPVAPYNTTQFLMDDHDQEEPDLKTGLYSKR	38	Unmodified	_AEMFAKGQPVAPYNTTQFLMDDHDQEEPDLKTGLYSKR_					0	0	0	3	HEXI1_HUMANProteinHEXIM1	HEXI1_HUMANProteinHEXIM1	HEXI1_HUMANProteinHEXIM1	MULTI-MSMS	FU20160819-08	625.447	7	625.302	4370.06	72711.6	2.9287	0.0018313	0.062442	3.9045e-05	2.9911	0.0018703	625.732	76.318	0.14701	76.318	76.253	76.4	0					27	15	3	0	0	0	5.9179e-07	1	38762	55.777
	AEMFAKGQPVAPYNTTQFLMDDHDQEEPDLKTGLYSKR	38	Unmodified	_AEMFAKGQPVAPYNTTQFLMDDHDQEEPDLKTGLYSKR_					0	0	0	3	HEXI1_HUMANProteinHEXIM1	HEXI1_HUMANProteinHEXIM1	HEXI1_HUMANProteinHEXIM1	MULTI-MSMS	FU20160819-08	729.687	6	729.351	4370.06	68897	1.7568	0.0012814	1.3275	0.00096822	3.0843	0.0022496	729.686	76.457	0.34184	76.457	76.347	76.688	7.6294e-06					276	33	10	0	0	0	2.4354e-06	1	38948	52.155
	AEMFAKGQPVAPYNTTQFLMDDHDQEEPDLKTGLYSKR	38	Unmodified	_AEMFAKGQPVAPYNTTQFLMDDHDQEEPDLKTGLYSKR_					0	0	0	3	HEXI1_HUMANProteinHEXIM1	HEXI1_HUMANProteinHEXIM1	HEXI1_HUMANProteinHEXIM1	MULTI-MSMS	FU20160819-08	1094.28	4	1093.52	4370.06	57445.4	2.443	0.0026714	0.4331	0.0004736	2.8761	0.003145	1094.02	76.457	0.24062	76.457	76.347	76.587	0					104	24	8	0	0	0	1.3206e-33	1	38953	109.33
	AEMFAKGQPVAPYNTTQFLMDDHDQEEPDLKTGLYSKR	38	Unmodified	_AEMFAKGQPVAPYNTTQFLMDDHDQEEPDLKTGLYSKR_					0	0	0	3	HEXI1_HUMANProteinHEXIM1	HEXI1_HUMANProteinHEXIM1	HEXI1_HUMANProteinHEXIM1	MULTI-MSMS	FU20160819-08	625.734	7	625.302	4370.06	73476.9	2.831	0.0017702	0.18653	0.00011664	3.0175	0.0018869	625.589	76.627	0.1308	76.627	76.542	76.673	0					51	12	8	0	0	0	1.7515e-06	1	39056	52.575
	AEMFAKGQPVAPYNTTQFLMDDHDQEEPDLKTGLYSKR	38	Unmodified	_AEMFAKGQPVAPYNTTQFLMDDHDQEEPDLKTGLYSKR_					0	0	0	3	HEXI1_HUMANProteinHEXIM1	HEXI1_HUMANProteinHEXIM1	HEXI1_HUMANProteinHEXIM1	MULTI-MSMS	FU20160819-08	729.687	6	729.351	4370.06	68701.2	1.5425	0.001125	0.31217	0.00022768	1.8547	0.0013527	729.686	77.145	0.16965	77.145	77.076	77.246	0					96	16	9	0	0	0	8.6739e-15	1	39596	64.058
	AEMFAKGQPVAPYNTTQFLMDDHDQEEPDLKTGLYSKR	38	Unmodified	_AEMFAKGQPVAPYNTTQFLMDDHDQEEPDLKTGLYSKR_					0	0	0	3	HEXI1_HUMANProteinHEXIM1	HEXI1_HUMANProteinHEXIM1	HEXI1_HUMANProteinHEXIM1	MULTI-MSMS	FU20160819-08	875.424	5	875.02	4370.06	63157.9	2.3346	0.0020428	-0.18196	-0.00015922	2.1526	0.0018836	875.421	77.294	0.18303	77.294	77.178	77.361	0					37	13	4	0	0	0	2.4574e-06	1	39721	52.326
	AEMFAKGQPVAPYNTTQFLMDDHDQEEPDLKTGLYSKR	38	Unmodified	_AEMFAKGQPVAPYNTTQFLMDDHDQEEPDLKTGLYSKR_					0	0	0	3	HEXI1_HUMANProteinHEXIM1	HEXI1_HUMANProteinHEXIM1	HEXI1_HUMANProteinHEXIM1	MULTI-MSMS	FU20160819-08	625.59	7	625.302	4370.06	73240.5	2.6115	0.001633	-0.42368	-0.00026493	2.1878	0.001368	625.73	77.294	0.089912	77.294	77.257	77.347	0					16	5	5	0	0	0	0.015527	1	39765	29.742
	AEMFAKGQPVAPYNTTQFLMDDHDQEEPDLKTGLYSKR	38	Unmodified	_AEMFAKGQPVAPYNTTQFLMDDHDQEEPDLKTGLYSKR_					0	0	0	3	HEXI1_HUMANProteinHEXIM1	HEXI1_HUMANProteinHEXIM1	HEXI1_HUMANProteinHEXIM1	MULTI-MSMS	FU20160819-08	729.688	6	729.351	4370.06	68835.5	1.1789	0.00085981	1.5014	0.001095	2.6802	0.0019548	729.853	78.331	0.13076	78.331	78.204	78.335	0					23	12	2	0	0	0	7.8678e-22	1	40597	73.868
	AEMFAKGQPVAPYNTTQFLMDDHDQEEPDLKTGLYSKR	38	Unmodified	_AEMFAKGQPVAPYNTTQFLMDDHDQEEPDLKTGLYSKR_					0	0	0	3	HEXI1_HUMANProteinHEXIM1	HEXI1_HUMANProteinHEXIM1	HEXI1_HUMANProteinHEXIM1	MULTI-MSMS	FU20160819-08	730.189	6	729.351	4370.06	68835.5	1.1272	0.00082212	1.0149	0.00074019	2.1421	0.0015623	729.686	78.387	0.28201	78.387	78.293	78.575	7.6294e-06					118	30	6	0	0	0	0.0009289	1	40832	42.384
	AEMFAKGQPVAPYNTTQFLMDDHDQEEPDLKTGLYSKR	38	Unmodified	_AEMFAKGQPVAPYNTTQFLMDDHDQEEPDLKTGLYSKR_					0	0	0	3	HEXI1_HUMANProteinHEXIM1	HEXI1_HUMANProteinHEXIM1	HEXI1_HUMANProteinHEXIM1	MULTI-MSMS	FU20160819-08	875.424	5	875.02	4370.06	63719.8	1.9634	0.001718	0.34753	0.00030409	2.3109	0.0020221	875.622	78.364	0.42097	78.364	78.293	78.713	7.6294e-06					46	42	2	0	0	0	8.1827e-31	1	40909	100.42
	AEMFAKGQPVAPYNTTQFLMDDHDQEEPDLKTGLYSKR	38	Unmodified	_AEMFAKGQPVAPYNTTQFLMDDHDQEEPDLKTGLYSKR_					0	0	0	3	HEXI1_HUMANProteinHEXIM1	HEXI1_HUMANProteinHEXIM1	HEXI1_HUMANProteinHEXIM1	MULTI-MSMS	FU20160819-08	729.352	6	729.351	4370.06	69436.2	0.99577	0.00072627	1.5435	0.0011258	2.5393	0.001852	729.854	78.814	0.35199	78.814	78.68	79.032	-7.6294e-06					66	35	4	0	0	0	3.3615e-23	1	41329	75.127
	AEMFAKGQPVAPYNTTQFLMDDHDQEEPDLKTGLYSKR	38	Unmodified	_AEMFAKGQPVAPYNTTQFLMDDHDQEEPDLKTGLYSKR_					0	0	0	3	HEXI1_HUMANProteinHEXIM1	HEXI1_HUMANProteinHEXIM1	HEXI1_HUMANProteinHEXIM1	MULTI-MSMS	FU20160819-08	875.422	5	875.02	4370.06	65126.2	1.6061	0.0014054	0.5512	0.00048231	2.1573	0.0018877	875.421	79.765	0.064217	79.765	79.744	79.808	7.6294e-06					7	5	2	0	0	0	3.396e-27	1	42021	91.985
	AEMFAKGQPVAPYNTTQFLMDDHDQEEPDLKTGLYSKR	38	Unmodified	_AEMFAKGQPVAPYNTTQFLMDDHDQEEPDLKTGLYSKR_					0	0	0	3	HEXI1_HUMANProteinHEXIM1	HEXI1_HUMANProteinHEXIM1	HEXI1_HUMANProteinHEXIM1	MULTI-MSMS	FU20160819-08	729.856	6	729.351	4370.06	69557.5	0.83629	0.00060995	2.6378	0.0019239	3.4741	0.0025339	729.52	80.25	0.1646	80.25	80.186	80.351	0					37	15	5	0	0	0	1.9696e-21	1	42419	71.891
	AEMFAKGQPVAPYNTTQFLMDDHDQEEPDLKTGLYSKR	38	Unmodified	_AEMFAKGQPVAPYNTTQFLMDDHDQEEPDLKTGLYSKR_					0	0	0	3	HEXI1_HUMANProteinHEXIM1	HEXI1_HUMANProteinHEXIM1	HEXI1_HUMANProteinHEXIM1	MULTI-MSMS	FU20160819-08	730.021	6	729.351	4370.06	73986.9	0.94343	0.00068809	1.7208	0.0012551	2.6642	0.0019432	729.686	81.039	0.13037	81.039	80.991	81.121	0					35	14	5	0	0	0	4.4717e-31	1	43177	102.31
	AEMFAKGQPVAPYNTTQFLMDDHDQEEPDLKTGLYSKR	38	Unmodified	_AEMFAKGQPVAPYNTTQFLMDDHDQEEPDLKTGLYSKR_					0	0	0	3	HEXI1_HUMANProteinHEXIM1	HEXI1_HUMANProteinHEXIM1	HEXI1_HUMANProteinHEXIM1	MULTI-MSMS	FU20160819-08	730.021	6	729.351	4370.06	71671.6	1.038	0.0007571	1.93	0.0014076	2.968	0.0021647	729.687	81.661	0.26186	81.661	81.593	81.855	0					37	26	2	0	0	0	2.2409e-06	1	43994	52.575
	AEMFAKGQPVAPYNTTQFLMDDHDQEEPDLKTGLYSKR	38	Unmodified	_AEMFAKGQPVAPYNTTQFLMDDHDQEEPDLKTGLYSKR_					0	0	0	3	HEXI1_HUMANProteinHEXIM1	HEXI1_HUMANProteinHEXIM1	HEXI1_HUMANProteinHEXIM1	MULTI-MSMS	FU20160819-08	729.523	6	729.351	4370.06	68105	1.2272	0.00089509	2.6021	0.0018978	3.8293	0.0027929	729.687	83.088	0.13919	83.088	83.067	83.206	0					16	13	2	0	0	0	7.8678e-22	1	45213	73.868
	AEMFAKGQPVAPYNTTQFLMDDHDQEEPDLKTGLYSKR	38	Unmodified	_AEMFAKGQPVAPYNTTQFLMDDHDQEEPDLKTGLYSKR_					0	0	0	3	HEXI1_HUMANProteinHEXIM1	HEXI1_HUMANProteinHEXIM1	HEXI1_HUMANProteinHEXIM1	MULTI-MSMS	FU20160819-08	729.688	6	729.351	4370.06	71997.3	1.2927	0.00094286	2.6754	0.0019513	3.9681	0.0028941	729.687	83.615	0.053268	83.615	83.599	83.652	0					8	5	3	0	0	0	1.8069e-21	1	45577	72.163
	AEMFAKGQPVAPYNTTQFLMDDHDQEEPDLKTGLYSKR	38	Unmodified	_AEMFAKGQPVAPYNTTQFLMDDHDQEEPDLKTGLYSKR_					0	0	0	3	HEXI1_HUMANProteinHEXIM1	HEXI1_HUMANProteinHEXIM1	HEXI1_HUMANProteinHEXIM1	MULTI-MSMS	FU20160819-08	729.687	6	729.351	4370.06	71740.5	1.3851	0.0010102	1.877	0.001369	3.2621	0.0023792	729.687	84.317	0.11208	84.317	84.261	84.373	0					12	11	2	0	0	0	0.0060852	1	46146	35.908
	AEMFAKGQPVAPYNTTQFLMDDHDQEEPDLKTGLYSKR	38	Unmodified	_AEMFAKGQPVAPYNTTQFLMDDHDQEEPDLKTGLYSKR_					0	0	0	3	HEXI1_HUMANProteinHEXIM1	HEXI1_HUMANProteinHEXIM1	HEXI1_HUMANProteinHEXIM1	MULTI-MSMS	FU20160819-08	730.021	6	729.351	4370.06	71200.6	1.5859	0.0011567	1.93	0.0014077	3.5159	0.0025643	729.854	85.819	0.2316	85.819	85.715	85.947	0					37	21	4	0	0	0	0.0009289	1	47480	42.384
	AEMFAKGQPVAPYNTTQFLMDDHDQEEPDLKTGLYSKR	38	Unmodified	_AEMFAKGQPVAPYNTTQFLMDDHDQEEPDLKTGLYSKR_					0	0	0	3	HEXI1_HUMANProteinHEXIM1	HEXI1_HUMANProteinHEXIM1	HEXI1_HUMANProteinHEXIM1	MULTI-MSMS	FU20160819-08	875.622	5	875.02	4370.06	74793.2	2.491	0.0021797	1.451	0.0012696	3.942	0.0034493	875.622	86.392	0.07338	86.392	86.326	86.399	0					11	7	2	0	0	0	8.6193e-11	1	47835	62.918
	AEMFAKGQPVAPYNTTQFLMDDHDQEEPDLKTGLYSKR	38	Unmodified	_AEMFAKGQPVAPYNTTQFLMDDHDQEEPDLKTGLYSKR_					0	0	0	3	HEXI1_HUMANProteinHEXIM1	HEXI1_HUMANProteinHEXIM1	HEXI1_HUMANProteinHEXIM1	MULTI-MSMS	FU20160819-08	875.824	5	875.02	4370.06	61876.7	2.6838	0.0023483	0.078007	6.8257e-05	2.7618	0.0024166	875.621	87.82	0.23616	87.82	87.69	87.926	0					37	19	3	0	0	0	2.6837e-06	1	49437	51.858
	AEMFAKGQPVAPYNTTQFLMDDHDQEEPDLKTGLYSKR	38	Unmodified	_AEMFAKGQPVAPYNTTQFLMDDHDQEEPDLKTGLYSKR_					0	0	0	3	HEXI1_HUMANProteinHEXIM1	HEXI1_HUMANProteinHEXIM1	HEXI1_HUMANProteinHEXIM1	MULTI-MSMS	FU20160819-08	875.825	5	875.02	4370.06	66858	2.841	0.0024859	0.26864	0.00023506	3.1096	0.002721	875.421	88.976	0.15235	88.976	88.925	89.077	0					19	13	2	0	0	0	0.033518	1	50515	24.856
	AEMFAKGQPVAPYNTTQFLMDDHDQEEPDLKTGLYSKR	38	Unmodified	_AEMFAKGQPVAPYNTTQFLMDDHDQEEPDLKTGLYSKR_					0	0	0	3	HEXI1_HUMANProteinHEXIM1	HEXI1_HUMANProteinHEXIM1	HEXI1_HUMANProteinHEXIM1	MULTI-MSMS	FU20160819-08	729.691	6	729.351	4370.06	71017.2	2.0427	0.0014898	1.5581	0.0011364	3.6007	0.0026262	729.686	89.244	0.11965	89.244	89.148	89.268	0					22	10	5	0	0	0	0.00094767	1	50701	42.301
	AEMFAKGQPVAPYNTTQFLMDDHDQEEPDLKTGLYSKR	38	Unmodified	_AEMFAKGQPVAPYNTTQFLMDDHDQEEPDLKTGLYSKR_					0	0	0	3	HEXI1_HUMANProteinHEXIM1	HEXI1_HUMANProteinHEXIM1	HEXI1_HUMANProteinHEXIM1	MULTI-MSMS	FU20160819-08	729.854	6	729.351	4370.06	74719.7	2.4092	0.0017571	0.072294	5.2727e-05	2.4815	0.0018099	729.851	93.066	0.044708	93.066	93.047	93.092	0					5	4	2	0	0	0	0.017386	1	54137	30.628
	AEMFAKGQPVAPYNTTQFLMDDHDQEEPDLKTGLYSKR	38	Unmodified	_AEMFAKGQPVAPYNTTQFLMDDHDQEEPDLKTGLYSKR_					0	0	0	3	HEXI1_HUMANProteinHEXIM1	HEXI1_HUMANProteinHEXIM1	HEXI1_HUMANProteinHEXIM1	MULTI-MSMS	FU20160819-08	729.521	6	729.351	4370.06	72279.6	3.3183	0.0024202	0.44865	0.00032723	3.7669	0.0027474	729.686	117.31	0.2869	117.31	117.2	117.49	0					80	32	5	0	0	0	0.0024751	1	75667	38.872
	AEMFAKGQPVAPYNTTQFLMDDHDQEEPDLKTGLYSKR	38	Unmodified	_AEMFAKGQPVAPYNTTQFLMDDHDQEEPDLKTGLYSKR_					0	0	0	3	HEXI1_HUMANProteinHEXIM1	HEXI1_HUMANProteinHEXIM1	HEXI1_HUMANProteinHEXIM1	MULTI-MSMS	FU20160819-08	730.023	6	729.351	4370.06	71882.2	3.3281	0.0024273	-0.084115	-6.135e-05	3.244	0.002366	729.519	117.62	0.37204	117.62	117.4	117.77	-7.6294e-06					88	37	4	0	0	0	0.00017509	3	75893	46.655
	AEMFAKGQPVAPYNTTQFLMDDHDQEEPDLKTGLYSKR	38	Unmodified	_AEMFAKGQPVAPYNTTQFLMDDHDQEEPDLKTGLYSKR_					0	0	0	3	HEXI1_HUMANProteinHEXIM1	HEXI1_HUMANProteinHEXIM1	HEXI1_HUMANProteinHEXIM1	MULTI-MSMS	FU20160819-08	729.521	6	729.351	4370.06	70990.6	3.344	0.002439	0.24024	0.00017522	3.5843	0.0026142	729.852	119.34	1.822	119.34	118.18	120	0					421	187	3	0	0	0	3.3287e-05	4	78434	50.627
	AEMFAKGQPVAPYNTTQFLMDDHDQEEPDLKTGLYSKR	38	Unmodified	_AEMFAKGQPVAPYNTTQFLMDDHDQEEPDLKTGLYSKR_					0	0	0	3	HEXI1_HUMANProteinHEXIM1	HEXI1_HUMANProteinHEXIM1	HEXI1_HUMANProteinHEXIM1	MULTI-MSMS	FU20160819-08	875.824	5	875.02	4370.06	64363.1	4.1734	0.0036518	-1.0886	-0.00095257	3.0848	0.0026993	875.42	119.27	1.8037	119.27	118.2	120	-7.6294e-06					545	185	4	0	0	0	4.1368e-08	4	78292	57.325
	AEMFAKGQPVAPYNTTQFLMDDHDQEEPDLKTGLYSKR	38	Unmodified	_AEMFAKGQPVAPYNTTQFLMDDHDQEEPDLKTGLYSKR_					0	0	0	3	HEXI1_HUMANProteinHEXIM1	HEXI1_HUMANProteinHEXIM1	HEXI1_HUMANProteinHEXIM1	MULTI-SECPEP	FU20160819-08	625.591	7	625.302	4370.06	73788.7	3.3148	0.0020728	-0.52805	-0.00033019	2.7868	0.0017426	625.588	75.139	0.32843	75.139	74.887	75.215	-7.6294e-06					93	36	5	0	0	0	5.9025e-06	1	37816	50.375
	AEMFAKGQPVAPYNTTQFLMDDHDQEEPDLKTGLYSKR	38	Unmodified	_AEMFAKGQPVAPYNTTQFLMDDHDQEEPDLKTGLYSKR_					0	0	0	3	HEXI1_HUMANProteinHEXIM1	HEXI1_HUMANProteinHEXIM1	HEXI1_HUMANProteinHEXIM1	MULTI-SECPEP	FU20160819-08	625.303	7	625.302	4370.06	72722.6	3.0441	0.0019035	-1.0984	-0.00068681	1.9458	0.0012167	625.588	75.919	0.14809	75.919	75.891	76.039	0					24	15	2	0	0	0	0.012666	1	38495	30.712
	AEMFAKGQPVAPYNTTQFLMDDHDQEEPDLKTGLYSKR	38	Unmodified	_AEMFAKGQPVAPYNTTQFLMDDHDQEEPDLKTGLYSKR_					0	0	0	3	HEXI1_HUMANProteinHEXIM1	HEXI1_HUMANProteinHEXIM1	HEXI1_HUMANProteinHEXIM1	MULTI-SECPEP	FU20160819-08	729.685	6	729.351	4370.06	68701.2	1.4571	0.0010627	0.062693	4.5725e-05	1.5198	0.0011085	729.852	77.367	0.28712	77.367	77.246	77.533	0					129	25	9	0	0	0	0.0013424	1	39935	42.384
	AEMFAKGQPVAPYNTTQFLMDDHDQEEPDLKTGLYSKR	38	Unmodified	_AEMFAKGQPVAPYNTTQFLMDDHDQEEPDLKTGLYSKR_					0	0	0	3	HEXI1_HUMANProteinHEXIM1	HEXI1_HUMANProteinHEXIM1	HEXI1_HUMANProteinHEXIM1	MULTI-SECPEP	FU20160819-08	730.021	6	729.351	4370.06	69113.2	2.1512	0.001569	0.72782	0.00053084	2.879	0.0020998	729.686	90.013	0.25645	90.013	89.933	90.189	0					43	21	3	0	0	0	0.0015294	1	51616	41.921
	AEMFAKGQPVAPYNTTQFLMDDHDQEEPDLKTGLYSKR	38	Unmodified	_AEMFAKGQPVAPYNTTQFLMDDHDQEEPDLKTGLYSKR_					0	0	0	3	HEXI1_HUMANProteinHEXIM1	HEXI1_HUMANProteinHEXIM1	HEXI1_HUMANProteinHEXIM1	MULTI-SECPEP	FU20160819-08	875.623	5	875.02	4370.06	63071.9	2.5981	0.0022734	0.00075588	6.6141e-07	2.5989	0.0022741	875.421	76.457	0.34977	76.457	76.339	76.688	0					205	34	9	0	0	0	4.8454e-18	1	39041	87.882
	AEMFAKGQPVAPYNTTQFLMDDHDQEEPDLKTGLYSKR	38	Unmodified	_AEMFAKGQPVAPYNTTQFLMDDHDQEEPDLKTGLYSKR_					0	0	0	3	HEXI1_HUMANProteinHEXIM1	HEXI1_HUMANProteinHEXIM1	HEXI1_HUMANProteinHEXIM1	MULTI-SECPEP	FU20160819-08	875.021	5	875.02	4370.06	63244.1	2.0306	0.0017768	1.3405	0.0011729	3.371	0.0029497	875.422	78.218	0.19108	78.218	78.101	78.293	0					44	17	5	0	0	0	0.00012154	1	40582	70.154
	AEMFAKGQPVAPYNTTQFLMDDHDQEEPDLKTGLYSKR	38	Unmodified	_AEMFAKGQPVAPYNTTQFLMDDHDQEEPDLKTGLYSKR_					0	0	0	3	HEXI1_HUMANProteinHEXIM1	HEXI1_HUMANProteinHEXIM1	HEXI1_HUMANProteinHEXIM1	MULTI-SECPEP	FU20160819-08	875.222	5	875.02	4370.06	65251.5	1.8112	0.0015849	0.30089	0.00026328	2.1121	0.0018482	875.622	81.297	0.17657	81.297	81.233	81.41	7.6294e-06					22	15	2	0	0	0	7.9015e-06	1	43397	53.724
	AEMFAKGQPVAPYNTTQFLMDDHDQEEPDLKTGLYSKR	38	Unmodified	_AEMFAKGQPVAPYNTTQFLMDDHDQEEPDLKTGLYSKR_					0	0	0	3	HEXI1_HUMANProteinHEXIM1	HEXI1_HUMANProteinHEXIM1	HEXI1_HUMANProteinHEXIM1	MULTI-SECPEP	FU20160819-08	1094.27	4	1093.52	4370.06	57330	1.9639	0.0021476	-2.2825	-0.002496	-0.31865	-0.00034845	1094.27	77.915	0.21223	77.915	77.816	78.028	0					39	18	4	0	0	0	1.2924e-36	1	40225	88.409
	AEMFAKGQPVAPYNTTQFLMDDHDQEEPDLKTGLYSKR	38	Unmodified	_AEMFAKGQPVAPYNTTQFLMDDHDQEEPDLKTGLYSKR_					0	0	0	3	HEXI1_HUMANProteinHEXIM1	HEXI1_HUMANProteinHEXIM1	HEXI1_HUMANProteinHEXIM1	MULTI-MSMS	FU20160819-10	729.687	6	729.351	4370.06	70021.2	3.3331	0.002431	-0.25942	-0.00018921	3.0737	0.0022418	729.518	77.379	0.63677	77.379	77.112	77.749	0					314	73	7	0	0	0	1.119e-09	1	44731	57.716
	AEMFAKGQPVAPYNTTQFLMDDHDQEEPDLKTGLYSKR	38	Unmodified	_AEMFAKGQPVAPYNTTQFLMDDHDQEEPDLKTGLYSKR_					0	0	0	3	HEXI1_HUMANProteinHEXIM1	HEXI1_HUMANProteinHEXIM1	HEXI1_HUMANProteinHEXIM1	MULTI-MSMS	FU20160819-11	875.422	5	875.02	4370.06	68643.9	4.0492	0.0035431	-1.1591	-0.0010143	2.8901	0.0025289	875.42	77.858	0.12624	77.858	77.789	77.915	7.6294e-06					23	14	2	0	0	0	0.018625	1	44378	30.459
	AENLQLLTENELHR	14	Unmodified	_AENLQLLTENELHR_					0	0	0	0	HEXI1_HUMANProteinHEXIM1	HEXI1_HUMANProteinHEXIM1	HEXI1_HUMANProteinHEXIM1	MULTI-MSMS	FU20160819-04	560.63	3	560.629	1678.86	79253.5	1.2302	0.00068967	0.51942	0.0002912	1.7496	0.00098087	560.629	61.546	0.68898	61.546	60.934	61.623	3.8147e-06					483	92	6	0	0	0	2.0371e-62	2	28722	195.94
	AENLQLLTENELHR	14	Unmodified	_AENLQLLTENELHR_					0	0	0	0	HEXI1_HUMANProteinHEXIM1	HEXI1_HUMANProteinHEXIM1	HEXI1_HUMANProteinHEXIM1	MULTI-MSMS	FU20160819-04	840.444	2	840.439	1678.86	65832.9	2.0418	0.001716	0.36584	0.00030747	2.4076	0.0020235	840.44	61.545	0.64139	61.545	60.981	61.623	0					375	86	5	0	0	0	0	2	28754	312.48
	AENLQLLTENELHR	14	Unmodified	_AENLQLLTENELHR_					0	0	0	0	HEXI1_HUMANProteinHEXIM1	HEXI1_HUMANProteinHEXIM1	HEXI1_HUMANProteinHEXIM1	MULTI-MSMS	FU20160819-04	560.63	3	560.629	1678.86	79253.5	1.4794	0.00082939	0.27843	0.0001561	1.7578	0.00098548	560.629	61.656	0.25854	61.656	61.623	61.881	0					126	34	6	0	0	0	2.0371e-62	1	29055	195.94
	AENLQLLTENELHR	14	Unmodified	_AENLQLLTENELHR_					0	0	0	0	HEXI1_HUMANProteinHEXIM1	HEXI1_HUMANProteinHEXIM1	HEXI1_HUMANProteinHEXIM1	MULTI-MSMS	FU20160819-04	840.442	2	840.439	1678.86	65959.3	2.2932	0.0019273	0.070107	5.8921e-05	2.3633	0.0019862	840.439	61.702	0.25246	61.702	61.593	61.846	0					122	33	6	0	0	0	3.1386e-154	1	29081	237.53
	AENLQLLTENELHR	14	Unmodified	_AENLQLLTENELHR_					0	0	0	0	HEXI1_HUMANProteinHEXIM1	HEXI1_HUMANProteinHEXIM1	HEXI1_HUMANProteinHEXIM1	MULTI-MSMS	FU20160819-04	560.63	3	560.629	1678.86	78976.1	1.8196	0.0010201	0.14488	8.1221e-05	1.9644	0.0011013	560.629	62.095	0.27261	62.095	61.982	62.255	0					211	35	7	0	0	0	2.4269e-31	1	29200	179.5
	AENLQLLTENELHR	14	Unmodified	_AENLQLLTENELHR_					0	0	0	0	HEXI1_HUMANProteinHEXIM1	HEXI1_HUMANProteinHEXIM1	HEXI1_HUMANProteinHEXIM1	MULTI-MSMS	FU20160819-04	840.441	2	840.439	1678.86	65717.5	2.6019	0.0021868	-0.10526	-8.8464e-05	2.4967	0.0020983	840.439	62.066	0.27261	62.066	61.982	62.255	0					125	35	6	0	0	0	0	1	29221	301.35
	AENLQLLTENELHR	14	Unmodified	_AENLQLLTENELHR_					0	0	0	0	HEXI1_HUMANProteinHEXIM1	HEXI1_HUMANProteinHEXIM1	HEXI1_HUMANProteinHEXIM1	MULTI-MSMS	FU20160819-04	841.946	2	840.439	1678.86	65832.9	2.7781	0.0023348	-0.058465	-4.9136e-05	2.7197	0.0022857	840.439	62.326	0.24314	62.326	62.139	62.383	0					112	30	5	0	0	0	0.00048451	1	29301	174.72
	AENLQLLTENELHR	14	Unmodified	_AENLQLLTENELHR_					0	0	0	0	HEXI1_HUMANProteinHEXIM1	HEXI1_HUMANProteinHEXIM1	HEXI1_HUMANProteinHEXIM1	MULTI-MSMS	FU20160819-04	840.441	2	840.439	1678.86	65832.8	2.9147	0.0024497	-0.44923	-0.00037755	2.4655	0.0020721	840.439	62.428	0.12276	62.428	62.369	62.492	0					54	15	5	0	0	0	1.3845e-24	1	29385	184.31
	AENLQLLTENELHR	14	Unmodified	_AENLQLLTENELHR_					0	0	0	0	HEXI1_HUMANProteinHEXIM1	HEXI1_HUMANProteinHEXIM1	HEXI1_HUMANProteinHEXIM1	MULTI-MSMS	FU20160819-04	560.965	3	560.629	1678.86	80268.4	2.3469	0.0013157	0.24047	0.00013481	2.5873	0.0014505	560.629	62.702	0.16013	62.702	62.69	62.85	0					25	19	2	0	0	0	1.2602e-132	1	29552	222.81
	AENLQLLTENELHR	14	Unmodified	_AENLQLLTENELHR_					0	0	0	0	HEXI1_HUMANProteinHEXIM1	HEXI1_HUMANProteinHEXIM1	HEXI1_HUMANProteinHEXIM1	MULTI-MSMS	FU20160819-04	840.442	2	840.439	1678.86	65959.3	3.1134	0.0026166	0.056911	4.783e-05	3.1703	0.0026644	840.439	62.67	0.21611	62.67	62.634	62.85	0					68	26	6	0	0	0	4.0545e-262	1	29579	278.41
	AENLQLLTENELHR	14	Unmodified	_AENLQLLTENELHR_					0	0	0	0	HEXI1_HUMANProteinHEXIM1	HEXI1_HUMANProteinHEXIM1	HEXI1_HUMANProteinHEXIM1	MULTI-MSMS	FU20160819-04	560.629	3	560.629	1678.86	79737.8	2.3836	0.0013363	-0.013998	-7.8475e-06	2.3696	0.0013285	560.629	62.926	0.2069	62.926	62.85	63.057	0					63	26	3	0	0	0	8.4958e-07	1	29721	155.39
	AENLQLLTENELHR	14	Unmodified	_AENLQLLTENELHR_					0	0	0	0	HEXI1_HUMANProteinHEXIM1	HEXI1_HUMANProteinHEXIM1	HEXI1_HUMANProteinHEXIM1	MULTI-MSMS	FU20160819-04	840.942	2	840.439	1678.86	65746.6	3.3415	0.0028083	-0.075676	-6.3601e-05	3.2658	0.0027447	840.439	63.503	0.099449	63.503	63.477	63.576	0					33	11	5	0	0	0	3.5417e-178	1	29995	243.85
	AENLQLLTENELHR	14	Unmodified	_AENLQLLTENELHR_					0	0	0	0	HEXI1_HUMANProteinHEXIM1	HEXI1_HUMANProteinHEXIM1	HEXI1_HUMANProteinHEXIM1	MULTI-MSMS	FU20160819-04	560.631	3	560.629	1678.86	78329.9	2.5717	0.0014418	0.28299	0.00015865	2.8547	0.0016004	560.629	63.678	0.28705	63.678	63.638	63.925	-3.8147e-06					66	35	5	0	0	0	5.9438e-50	1	30132	190.57
	AENLQLLTENELHR	14	Unmodified	_AENLQLLTENELHR_					0	0	0	0	HEXI1_HUMANProteinHEXIM1	HEXI1_HUMANProteinHEXIM1	HEXI1_HUMANProteinHEXIM1	MULTI-MSMS	FU20160819-04	840.442	2	840.439	1678.86	65463	3.4431	0.0028937	-0.43659	-0.00036692	3.0065	0.0025268	840.439	63.928	0.31929	63.928	63.765	64.084	3.8147e-06					53	37	5	0	0	0	9.2042e-111	1	30179	228.78
	AENLQLLTENELHR	14	Unmodified	_AENLQLLTENELHR_					0	0	0	0	HEXI1_HUMANProteinHEXIM1	HEXI1_HUMANProteinHEXIM1	HEXI1_HUMANProteinHEXIM1	MULTI-MSMS	FU20160819-04	560.631	3	560.629	1678.86	79737.8	2.7186	0.0015241	0.10173	5.7033e-05	2.8203	0.0015811	560.629	64.144	0.11526	64.144	64.041	64.156	0					30	12	3	0	0	0	1.5977e-31	1	30342	180.3
	AENLQLLTENELHR	14	Unmodified	_AENLQLLTENELHR_					0	0	0	0	HEXI1_HUMANProteinHEXIM1	HEXI1_HUMANProteinHEXIM1	HEXI1_HUMANProteinHEXIM1	MULTI-MSMS	FU20160819-04	840.445	2	840.439	1678.86	62886.3	3.4786	0.0029235	-0.12324	-0.00010358	3.3553	0.00282	840.439	64.194	0.13408	64.194	64.133	64.267	0					40	15	5	0	0	0	0.00071144	1	30418	132.79
	AENLQLLTENELHR	14	Unmodified	_AENLQLLTENELHR_					0	0	0	0	HEXI1_HUMANProteinHEXIM1	HEXI1_HUMANProteinHEXIM1	HEXI1_HUMANProteinHEXIM1	MULTI-MSMS	FU20160819-04	560.63	3	560.629	1678.86	76969.8	2.5446	0.0014266	0.32895	0.00018442	2.8736	0.001611	560.629	64.316	0.24617	64.316	64.245	64.491	0					95	28	5	0	0	0	1.4828e-131	1	30581	217.46
	AENLQLLTENELHR	14	Unmodified	_AENLQLLTENELHR_					0	0	0	0	HEXI1_HUMANProteinHEXIM1	HEXI1_HUMANProteinHEXIM1	HEXI1_HUMANProteinHEXIM1	MULTI-MSMS	FU20160819-04	840.944	2	840.439	1678.86	65519.5	3.2256	0.0027109	0.60881	0.00051167	3.8344	0.0032226	840.44	64.526	0.20041	64.526	64.448	64.649	0					47	22	4	0	0	0	0.027052	1	30650	107.39
	AENLQLLTENELHR	14	Unmodified	_AENLQLLTENELHR_					0	0	0	0	HEXI1_HUMANProteinHEXIM1	HEXI1_HUMANProteinHEXIM1	HEXI1_HUMANProteinHEXIM1	MULTI-MSMS	FU20160819-04	840.443	2	840.439	1678.86	62644.4	3.0247	0.0025421	1.5833	0.0013307	4.608	0.0038727	840.441	64.82	0.14056	64.82	64.762	64.903	0					26	16	3	0	0	0	3.5162e-62	1	30911	211.38
	AENLQLLTENELHR	14	Unmodified	_AENLQLLTENELHR_					0	0	0	0	HEXI1_HUMANProteinHEXIM1	HEXI1_HUMANProteinHEXIM1	HEXI1_HUMANProteinHEXIM1	MULTI-MSMS	FU20160819-04	840.932	2	840.439	1678.86	51370.7	2.9201	0.0024542	-0.92687	-0.00077898	1.9933	0.0016752	840.44	64.973	0.16008	64.973	64.903	65.063	0					35	19	3	0	0	0	2.0826e-31	1	31044	190.66
	AENLQLLTENELHR	14	Unmodified	_AENLQLLTENELHR_					0	0	0	0	HEXI1_HUMANProteinHEXIM1	HEXI1_HUMANProteinHEXIM1	HEXI1_HUMANProteinHEXIM1	MULTI-MSMS	FU20160819-04	560.63	3	560.629	1678.86	66539.9	1.6541	0.00092736	0.19954	0.00011187	1.8537	0.0010392	560.629	65.836	0.095261	65.836	65.797	65.893	0					13	10	2	0	0	0	1.537e-62	1	31669	196.84
	AENLQLLTENELHR	14	Unmodified	_AENLQLLTENELHR_					0	0	0	0	HEXI1_HUMANProteinHEXIM1	HEXI1_HUMANProteinHEXIM1	HEXI1_HUMANProteinHEXIM1	MULTI-MSMS	FU20160819-04	560.964	3	560.629	1678.86	75873.4	1.6424	0.0009208	0.90616	0.00050802	2.5486	0.0014288	560.629	66.29	0.21509	66.29	66.175	66.39	0					55	24	3	0	0	0	1.0044e-131	1	31886	219.35
	AENLQLLTENELHR	14	Unmodified	_AENLQLLTENELHR_					0	0	0	0	HEXI1_HUMANProteinHEXIM1	HEXI1_HUMANProteinHEXIM1	HEXI1_HUMANProteinHEXIM1	MULTI-MSMS	FU20160819-04	560.63	3	560.629	1678.86	75873.5	1.63	0.00091382	1.2864	0.00072117	2.9163	0.001635	560.629	66.63	0.18193	66.63	66.542	66.724	0					41	21	3	0	0	0	9.2304e-205	1	32249	240.18
	AENLQLLTENELHR	14	Unmodified	_AENLQLLTENELHR_					0	0	0	0	HEXI1_HUMANProteinHEXIM1	HEXI1_HUMANProteinHEXIM1	HEXI1_HUMANProteinHEXIM1	MULTI-MSMS	FU20160819-04	560.63	3	560.629	1678.86	81210.5	1.4933	0.0008372	0.66672	0.00037378	2.16	0.001211	560.629	95.195	0.073166	95.195	95.142	95.216	0					14	7	3	0	0	0	0.00014143	1	57706	131.32
	AENLQLLTENELHR	14	Unmodified	_AENLQLLTENELHR_					0	0	0	0	HEXI1_HUMANProteinHEXIM1	HEXI1_HUMANProteinHEXIM1	HEXI1_HUMANProteinHEXIM1	MULTI-MSMS	FU20160819-04	560.964	3	560.629	1678.86	92114.8	2.7254	0.0015279	-0.20778	-0.00011649	2.5176	0.0014114	560.628	101.91	0.040245	101.91	101.89	101.93	0					5	3	2	0	0	0	0.030191	1	63998	79.875
	AENLQLLTENELHR	14	Unmodified	_AENLQLLTENELHR_					0	0	0	0	HEXI1_HUMANProteinHEXIM1	HEXI1_HUMANProteinHEXIM1	HEXI1_HUMANProteinHEXIM1	MULTI-MSMS	FU20160819-04	560.963	3	560.629	1678.86	87074.8	2.4592	0.0013787	-0.079576	-4.4613e-05	2.3796	0.0013341	560.628	108.13	0.071312	108.13	108.07	108.14	7.6294e-06					7	5	2	0	0	0	0.032557	1	69571	78.486
	AENLQLLTENELHR	14	Unmodified	_AENLQLLTENELHR_					0	0	0	0	HEXI1_HUMANProteinHEXIM1	HEXI1_HUMANProteinHEXIM1	HEXI1_HUMANProteinHEXIM1	MULTI-MSMS	FU20160819-04	560.965	3	560.629	1678.86	89430.4	2.3114	0.0012959	0.70777	0.00039679	3.0192	0.0016927	560.963	111.21	0.042198	111.21	111.19	111.23	0					5	4	2	0	0	0	0.0089053	1	72377	95.264
	AENLQLLTENELHR	14	Unmodified	_AENLQLLTENELHR_					0	0	0	0	HEXI1_HUMANProteinHEXIM1	HEXI1_HUMANProteinHEXIM1	HEXI1_HUMANProteinHEXIM1	MSMS	FU20160819-04	840.444	2	840.439	1678.86	NaN	NaN	NaN	NaN	NaN	NaN	NaN	NaN	63.136	1	63.136	62.636	63.636	3.8147e-06								0	0	0	0	1	29796	230.06
	AENLQLLTENELHR	14	Unmodified	_AENLQLLTENELHR_					0	0	0	0	HEXI1_HUMANProteinHEXIM1	HEXI1_HUMANProteinHEXIM1	HEXI1_HUMANProteinHEXIM1	MSMS	FU20160819-04	560.63	3	560.629	1678.86	NaN	NaN	NaN	NaN	NaN	NaN	NaN	NaN	64.751	1	64.751	64.251	65.251	7.6294e-06								0	0	0	0	1	30835	228.17
	AENLQLLTENELHR	14	Unmodified	_AENLQLLTENELHR_					0	0	0	0	HEXI1_HUMANProteinHEXIM1	HEXI1_HUMANProteinHEXIM1	HEXI1_HUMANProteinHEXIM1	MSMS	FU20160819-04	560.63	3	560.629	1678.86	NaN	NaN	NaN	NaN	NaN	NaN	NaN	NaN	65.088	1	65.088	64.588	65.588	0								0	0	0	2.6576e-109	1	31052	180.3
	AENLQLLTENELHR	14	Unmodified	_AENLQLLTENELHR_					0	0	0	0	HEXI1_HUMANProteinHEXIM1	HEXI1_HUMANProteinHEXIM1	HEXI1_HUMANProteinHEXIM1	MSMS	FU20160819-04	840.438	2	840.439	1678.86	NaN	NaN	NaN	NaN	NaN	NaN	NaN	NaN	66.59	1	66.59	66.09	67.09	0								0	0	0	4.4032e-08	1	32215	154.36
	AENLQLLTENELHR	14	Unmodified	_AENLQLLTENELHR_					0	0	0	0	HEXI1_HUMANProteinHEXIM1	HEXI1_HUMANProteinHEXIM1	HEXI1_HUMANProteinHEXIM1	MSMS	FU20160819-04	560.63	3	560.629	1678.86	NaN	NaN	NaN	NaN	NaN	NaN	NaN	NaN	67.011	1	67.011	66.511	67.511	0								0	0	0	1.3109e-77	1	32447	168.89
	AENLQLLTENELHR	14	Unmodified	_AENLQLLTENELHR_					0	0	0	0	HEXI1_HUMANProteinHEXIM1	HEXI1_HUMANProteinHEXIM1	HEXI1_HUMANProteinHEXIM1	MSMS	FU20160819-04	560.63	3	560.629	1678.86	NaN	NaN	NaN	NaN	NaN	NaN	NaN	NaN	67.382	1	67.382	66.882	67.882	0								0	0	0	2.2019e-51	1	32634	157.09
	AENLQLLTENELHR	14	Unmodified	_AENLQLLTENELHR_					0	0	0	0	HEXI1_HUMANProteinHEXIM1	HEXI1_HUMANProteinHEXIM1	HEXI1_HUMANProteinHEXIM1	MSMS	FU20160819-04	560.63	3	560.629	1678.86	NaN	NaN	NaN	NaN	NaN	NaN	NaN	NaN	68.146	1	68.146	67.646	68.646	0								0	0	0	2.7829e-94	1	33020	178.84
	AENLQLLTENELHR	14	Unmodified	_AENLQLLTENELHR_					0	0	0	0	HEXI1_HUMANProteinHEXIM1	HEXI1_HUMANProteinHEXIM1	HEXI1_HUMANProteinHEXIM1	MSMS	FU20160819-04	560.632	3	560.629	1678.86	NaN	NaN	NaN	NaN	NaN	NaN	NaN	NaN	72.281	1	72.281	71.781	72.781	0								0	0	0	3.1214e-41	1	36296	154.72
	AENLQLLTENELHR	14	Unmodified	_AENLQLLTENELHR_					0	0	0	0	HEXI1_HUMANProteinHEXIM1	HEXI1_HUMANProteinHEXIM1	HEXI1_HUMANProteinHEXIM1	MSMS	FU20160819-04	560.63	3	560.629	1678.86	NaN	NaN	NaN	NaN	NaN	NaN	NaN	NaN	73.207	1	73.207	72.707	73.707	0								0	0	0	7.4746e-65	1	36984	166.62
	AENLQLLTENELHR	14	Unmodified	_AENLQLLTENELHR_					0	0	0	0	HEXI1_HUMANProteinHEXIM1	HEXI1_HUMANProteinHEXIM1	HEXI1_HUMANProteinHEXIM1	MSMS	FU20160819-04	560.63	3	560.629	1678.86	NaN	NaN	NaN	NaN	NaN	NaN	NaN	NaN	74.794	1	74.794	74.294	75.294	0								0	0	0	2.0937e-20	1	38434	138.55
	AENLQLLTENELHR	14	Unmodified	_AENLQLLTENELHR_					0	0	0	0	HEXI1_HUMANProteinHEXIM1	HEXI1_HUMANProteinHEXIM1	HEXI1_HUMANProteinHEXIM1	MSMS	FU20160819-04	560.632	3	560.629	1678.86	NaN	NaN	NaN	NaN	NaN	NaN	NaN	NaN	76.73	1	76.73	76.23	77.23	0								0	0	0	1.999e-20	1	40206	138.77
	AENLQLLTENELHR	14	Unmodified	_AENLQLLTENELHR_					0	0	0	0	HEXI1_HUMANProteinHEXIM1	HEXI1_HUMANProteinHEXIM1	HEXI1_HUMANProteinHEXIM1	MSMS	FU20160819-04	560.63	3	560.629	1678.86	NaN	NaN	NaN	NaN	NaN	NaN	NaN	NaN	83.02	1	83.02	82.52	83.52	0								0	0	0	1.3109e-77	1	45521	168.89
	AENLQLLTENELHR	14	Unmodified	_AENLQLLTENELHR_					0	0	0	0	HEXI1_HUMANProteinHEXIM1	HEXI1_HUMANProteinHEXIM1	HEXI1_HUMANProteinHEXIM1	MSMS	FU20160819-04	560.963	3	560.629	1678.86	NaN	NaN	NaN	NaN	NaN	NaN	NaN	NaN	85.825	1	85.825	85.325	86.325	0								0	0	0	1.3236e-20	1	48393	140.33
	AENLQLLTENELHR	14	Unmodified	_AENLQLLTENELHR_					0	0	0	0	HEXI1_HUMANProteinHEXIM1	HEXI1_HUMANProteinHEXIM1	HEXI1_HUMANProteinHEXIM1	MSMS	FU20160819-04	560.629	3	560.629	1678.86	NaN	NaN	NaN	NaN	NaN	NaN	NaN	NaN	87.097	1	87.097	86.597	87.597	0								0	0	0	3.1226e-109	1	49687	179.5
	AENLQLLTENELHR	14	Unmodified	_AENLQLLTENELHR_					0	0	0	0	HEXI1_HUMANProteinHEXIM1	HEXI1_HUMANProteinHEXIM1	HEXI1_HUMANProteinHEXIM1	MSMS	FU20160819-04	560.63	3	560.629	1678.86	NaN	NaN	NaN	NaN	NaN	NaN	NaN	NaN	96.087	1	96.087	95.587	96.587	0								0	0	0	7.6588e-14	1	58554	136.33
	AENLQLLTENELHR	14	Unmodified	_AENLQLLTENELHR_					0	0	0	0	HEXI1_HUMANProteinHEXIM1	HEXI1_HUMANProteinHEXIM1	HEXI1_HUMANProteinHEXIM1	MSMS	FU20160819-04	560.63	3	560.629	1678.86	NaN	NaN	NaN	NaN	NaN	NaN	NaN	NaN	97.854	1	97.854	97.354	98.354	0								0	0	0	0.034388	1	60091	85.457
	AENLQLLTENELHR	14	Unmodified	_AENLQLLTENELHR_					0	0	0	0	HEXI1_HUMANProteinHEXIM1	HEXI1_HUMANProteinHEXIM1	HEXI1_HUMANProteinHEXIM1	MSMS	FU20160819-04	560.629	3	560.629	1678.86	NaN	NaN	NaN	NaN	NaN	NaN	NaN	NaN	102.81	1	102.81	102.31	103.31	-7.6294e-06								0	0	0	0.024844	1	64841	88.075
	AENLQLLTENELHR	14	Unmodified	_AENLQLLTENELHR_					0	0	0	0	HEXI1_HUMANProteinHEXIM1	HEXI1_HUMANProteinHEXIM1	HEXI1_HUMANProteinHEXIM1	MULTI-MSMS	FU20160819-05	560.63	3	560.629	1678.86	80243.4	2.4727	0.0013863	0.2282	0.00012794	2.7009	0.0015142	560.629	47.628	0.070194	47.628	47.601	47.671	0					12	8	3	0	0	0	3.239e-07	1	19033	157.09
	AENLQLLTENELHR	14	Unmodified	_AENLQLLTENELHR_					0	0	0	0	HEXI1_HUMANProteinHEXIM1	HEXI1_HUMANProteinHEXIM1	HEXI1_HUMANProteinHEXIM1	MULTI-MSMS	FU20160819-05	561.297	3	560.629	1678.86	82185.7	2.204	0.0012356	-0.12176	-6.826e-05	2.0822	0.0011673	560.963	57.727	0.26393	57.727	57.569	57.833	0					72	35	3	0	0	0	9.2431e-07	1	25672	155.14
	AENLQLLTENELHR	14	Unmodified	_AENLQLLTENELHR_					0	0	0	0	HEXI1_HUMANProteinHEXIM1	HEXI1_HUMANProteinHEXIM1	HEXI1_HUMANProteinHEXIM1	MULTI-MSMS	FU20160819-05	560.63	3	560.629	1678.86	78558.6	2.085	0.0011689	-0.60308	-0.0003381	1.4819	0.00083081	560.628	61.56	2.8584	61.56	60.921	63.78	0					1854	392	6	0	0	0	5.6466e-93	11	28552	206.46
	AENLQLLTENELHR	14	Unmodified	_AENLQLLTENELHR_					0	0	0	0	HEXI1_HUMANProteinHEXIM1	HEXI1_HUMANProteinHEXIM1	HEXI1_HUMANProteinHEXIM1	MULTI-MSMS	FU20160819-05	840.441	2	840.439	1678.86	65731.9	1.922	0.0016154	0.33531	0.00028181	2.2574	0.0018972	840.439	61.416	0.535	61.416	60.958	61.493	0					317	73	6	0	0	0	3.1386e-154	2	28433	237.53
	AENLQLLTENELHR	14	Unmodified	_AENLQLLTENELHR_					0	0	0	0	HEXI1_HUMANProteinHEXIM1	HEXI1_HUMANProteinHEXIM1	HEXI1_HUMANProteinHEXIM1	MULTI-MSMS	FU20160819-05	840.441	2	840.439	1678.86	65731.8	2.0193	0.0016971	0.1566	0.00013161	2.1759	0.0018287	840.439	61.608	1.7435	61.608	61.479	63.222	0					923	240	6	0	0	0	2.468e-261	5	28784	253.42
	AENLQLLTENELHR	14	Unmodified	_AENLQLLTENELHR_					0	0	0	0	HEXI1_HUMANProteinHEXIM1	HEXI1_HUMANProteinHEXIM1	HEXI1_HUMANProteinHEXIM1	MULTI-MSMS	FU20160819-05	840.442	2	840.439	1678.86	65944.4	2.234	0.0018775	0.51899	0.00043618	2.753	0.0023137	840.44	63.235	0.64211	63.235	63.138	63.78	0					188	85	3	0	0	0	6.1111e-232	2	29397	241.15
	AENLQLLTENELHR	14	Unmodified	_AENLQLLTENELHR_					0	0	0	0	HEXI1_HUMANProteinHEXIM1	HEXI1_HUMANProteinHEXIM1	HEXI1_HUMANProteinHEXIM1	MULTI-MSMS	FU20160819-05	560.63	3	560.629	1678.86	78908.8	2.3179	0.0012995	0.24795	0.00013901	2.5658	0.0014385	560.629	63.864	0.68354	63.864	63.78	64.463	-3.8147e-06					297	88	5	0	0	0	2.1632e-62	2	29845	195.71
	AENLQLLTENELHR	14	Unmodified	_AENLQLLTENELHR_					0	0	0	0	HEXI1_HUMANProteinHEXIM1	HEXI1_HUMANProteinHEXIM1	HEXI1_HUMANProteinHEXIM1	MULTI-MSMS	FU20160819-05	840.942	2	840.439	1678.86	66051.7	2.1943	0.0018442	1.4122	0.0011869	3.6065	0.0030311	840.441	64.079	0.47081	64.079	63.983	64.454	0					112	60	2	0	0	0	2.0642e-76	2	29604	208.08
	AENLQLLTENELHR	14	Unmodified	_AENLQLLTENELHR_					0	0	0	0	HEXI1_HUMANProteinHEXIM1	HEXI1_HUMANProteinHEXIM1	HEXI1_HUMANProteinHEXIM1	MULTI-MSMS	FU20160819-05	560.964	3	560.629	1678.86	78908.8	2.1592	0.0012105	0.19128	0.00010724	2.3505	0.0013177	560.629	64.573	0.72755	64.573	64.445	65.173	0					265	93	5	0	0	0	2.4549e-50	1	30105	192.4
	AENLQLLTENELHR	14	Unmodified	_AENLQLLTENELHR_					0	0	0	0	HEXI1_HUMANProteinHEXIM1	HEXI1_HUMANProteinHEXIM1	HEXI1_HUMANProteinHEXIM1	MULTI-MSMS	FU20160819-05	840.442	2	840.439	1678.86	65944.4	2.0761	0.0017448	0.85186	0.00071594	2.9279	0.0024608	840.941	64.576	0.72755	64.576	64.445	65.173	0					158	93	3	0	0	0	3.67e-39	1	30113	184.31
	AENLQLLTENELHR	14	Unmodified	_AENLQLLTENELHR_					0	0	0	0	HEXI1_HUMANProteinHEXIM1	HEXI1_HUMANProteinHEXIM1	HEXI1_HUMANProteinHEXIM1	MULTI-MSMS	FU20160819-05	560.63	3	560.629	1678.86	78507.2	1.8111	0.0010153	0.55372	0.00031043	2.3648	0.0013258	560.629	66.613	0.23234	66.613	66.467	66.699	0					43	27	2	0	0	0	1.3692e-131	1	31689	217.91
	AENLQLLTENELHR	14	Unmodified	_AENLQLLTENELHR_					0	0	0	0	HEXI1_HUMANProteinHEXIM1	HEXI1_HUMANProteinHEXIM1	HEXI1_HUMANProteinHEXIM1	MULTI-MSMS	FU20160819-05	560.966	3	560.629	1678.86	79453.2	3.4125	0.0019132	0.40925	0.00022943	3.8218	0.0021426	560.963	93.085	0.07515	93.085	93.038	93.113	-7.6294e-06					16	6	4	0	0	0	0.00020621	1	55145	129.77
	AENLQLLTENELHR	14	Unmodified	_AENLQLLTENELHR_					0	0	0	0	HEXI1_HUMANProteinHEXIM1	HEXI1_HUMANProteinHEXIM1	HEXI1_HUMANProteinHEXIM1	MULTI-MSMS	FU20160819-05	560.965	3	560.629	1678.86	82303	3.6584	0.002051	0.029777	1.6694e-05	3.6882	0.0020677	560.628	94.384	0.079147	94.384	94.311	94.39	0					7	6	2	0	0	0	0.00021326	1	56291	139.86
	AENLQLLTENELHR	14	Unmodified	_AENLQLLTENELHR_					0	0	0	0	HEXI1_HUMANProteinHEXIM1	HEXI1_HUMANProteinHEXIM1	HEXI1_HUMANProteinHEXIM1	MULTI-MSMS	FU20160819-05	560.633	3	560.629	1678.86	83318.8	4.8062	0.0026945	0.47498	0.00026629	5.2812	0.0029608	560.629	105.4	0.12489	105.4	105.31	105.43	0					12	11	2	0	0	0	8.078e-05	1	65053	136.3
	AENLQLLTENELHR	14	Unmodified	_AENLQLLTENELHR_					0	0	0	0	HEXI1_HUMANProteinHEXIM1	HEXI1_HUMANProteinHEXIM1	HEXI1_HUMANProteinHEXIM1	MULTI-MSMS	FU20160819-05	840.442	2	840.439	1678.86	64628.2	4.2289	0.0035541	0.66366	0.00055777	4.8926	0.0041119	840.44	107.54	0.062866	107.54	107.5	107.57	-7.6294e-06					14	4	5	0	0	0	0.015505	1	66654	110.31
	AENLQLLTENELHR	14	Unmodified	_AENLQLLTENELHR_					0	0	0	0	HEXI1_HUMANProteinHEXIM1	HEXI1_HUMANProteinHEXIM1	HEXI1_HUMANProteinHEXIM1	MULTI-MSMS	FU20160819-05	560.967	3	560.629	1678.86	80320.6	5.0313	0.0028207	-1.6814	-0.00094262	3.35	0.0018781	560.962	109.37	0.047638	109.37	109.34	109.38	7.6294e-06					11	4	4	0	0	0	0.02793	1	68098	81.185
	AENLQLLTENELHR	14	Unmodified	_AENLQLLTENELHR_					0	0	0	0	HEXI1_HUMANProteinHEXIM1	HEXI1_HUMANProteinHEXIM1	HEXI1_HUMANProteinHEXIM1	MSMS	FU20160819-05	560.63	3	560.629	1678.86	NaN	NaN	NaN	NaN	NaN	NaN	NaN	NaN	65.06	1	65.06	64.56	65.56	0								0	0	0	3.7507e-52	1	30372	160.46
	AENLQLLTENELHR	14	Unmodified	_AENLQLLTENELHR_					0	0	0	0	HEXI1_HUMANProteinHEXIM1	HEXI1_HUMANProteinHEXIM1	HEXI1_HUMANProteinHEXIM1	MSMS	FU20160819-05	840.44	2	840.439	1678.86	NaN	NaN	NaN	NaN	NaN	NaN	NaN	NaN	65.081	1	65.081	64.581	65.581	-7.6294e-06								0	0	0	4.5381e-51	1	30395	162.32
	AENLQLLTENELHR	14	Unmodified	_AENLQLLTENELHR_					0	0	0	0	HEXI1_HUMANProteinHEXIM1	HEXI1_HUMANProteinHEXIM1	HEXI1_HUMANProteinHEXIM1	MSMS	FU20160819-05	840.439	2	840.439	1678.86	NaN	NaN	NaN	NaN	NaN	NaN	NaN	NaN	66.661	1	66.661	66.161	67.161	0								0	0	0	1.2151e-92	1	31766	184.98
	AENLQLLTENELHR	14	Unmodified	_AENLQLLTENELHR_					0	0	0	0	HEXI1_HUMANProteinHEXIM1	HEXI1_HUMANProteinHEXIM1	HEXI1_HUMANProteinHEXIM1	MSMS	FU20160819-05	560.63	3	560.629	1678.86	NaN	NaN	NaN	NaN	NaN	NaN	NaN	NaN	67.007	1	67.007	66.507	67.507	0								0	0	0	2.0937e-20	1	31916	138.55
	AENLQLLTENELHR	14	Unmodified	_AENLQLLTENELHR_					0	0	0	0	HEXI1_HUMANProteinHEXIM1	HEXI1_HUMANProteinHEXIM1	HEXI1_HUMANProteinHEXIM1	MSMS	FU20160819-05	560.629	3	560.629	1678.86	NaN	NaN	NaN	NaN	NaN	NaN	NaN	NaN	67.684	1	67.684	67.184	68.184	0								0	0	0	1.8079e-109	1	32200	181.76
	AENLQLLTENELHR	14	Unmodified	_AENLQLLTENELHR_					0	0	0	0	HEXI1_HUMANProteinHEXIM1	HEXI1_HUMANProteinHEXIM1	HEXI1_HUMANProteinHEXIM1	MSMS	FU20160819-05	560.63	3	560.629	1678.86	NaN	NaN	NaN	NaN	NaN	NaN	NaN	NaN	68.044	1	68.044	67.544	68.544	0								0	0	0	2.6576e-109	1	32386	180.3
	AENLQLLTENELHR	14	Unmodified	_AENLQLLTENELHR_					0	0	0	0	HEXI1_HUMANProteinHEXIM1	HEXI1_HUMANProteinHEXIM1	HEXI1_HUMANProteinHEXIM1	MSMS	FU20160819-05	560.628	3	560.629	1678.86	NaN	NaN	NaN	NaN	NaN	NaN	NaN	NaN	69.149	1	69.149	68.649	69.649	0								0	0	0	0.0030612	1	33135	112.72
	AENLQLLTENELHR	14	Unmodified	_AENLQLLTENELHR_					0	0	0	0	HEXI1_HUMANProteinHEXIM1	HEXI1_HUMANProteinHEXIM1	HEXI1_HUMANProteinHEXIM1	MSMS	FU20160819-05	560.63	3	560.629	1678.86	NaN	NaN	NaN	NaN	NaN	NaN	NaN	NaN	71.837	1	71.837	71.337	72.337	0								0	0	0	1.427e-51	1	35360	158.52
	AENLQLLTENELHR	14	Unmodified	_AENLQLLTENELHR_					0	0	0	0	HEXI1_HUMANProteinHEXIM1	HEXI1_HUMANProteinHEXIM1	HEXI1_HUMANProteinHEXIM1	MSMS	FU20160819-05	560.63	3	560.629	1678.86	NaN	NaN	NaN	NaN	NaN	NaN	NaN	NaN	72.556	1	72.556	72.056	73.056	0								0	0	0	1.7811e-51	1	35913	157.86
	AENLQLLTENELHR	14	Unmodified	_AENLQLLTENELHR_					0	0	0	0	HEXI1_HUMANProteinHEXIM1	HEXI1_HUMANProteinHEXIM1	HEXI1_HUMANProteinHEXIM1	MSMS	FU20160819-05	560.63	3	560.629	1678.86	NaN	NaN	NaN	NaN	NaN	NaN	NaN	NaN	75.091	1	75.091	74.591	75.591	0								0	0	0	1.8688e-40	1	38168	152.16
	AENLQLLTENELHR	14	Unmodified	_AENLQLLTENELHR_					0	0	0	0	HEXI1_HUMANProteinHEXIM1	HEXI1_HUMANProteinHEXIM1	HEXI1_HUMANProteinHEXIM1	MSMS	FU20160819-05	560.964	3	560.629	1678.86	NaN	NaN	NaN	NaN	NaN	NaN	NaN	NaN	75.711	1	75.711	75.211	76.211	0								0	0	0	1.2552e-29	1	38798	144.8
	AENLQLLTENELHR	14	Unmodified	_AENLQLLTENELHR_					0	0	0	0	HEXI1_HUMANProteinHEXIM1	HEXI1_HUMANProteinHEXIM1	HEXI1_HUMANProteinHEXIM1	MSMS	FU20160819-05	560.63	3	560.629	1678.86	NaN	NaN	NaN	NaN	NaN	NaN	NaN	NaN	83.043	1	83.043	82.543	83.543	0								0	0	0	2.3907e-08	1	44972	128.95
	AENLQLLTENELHR	14	Unmodified	_AENLQLLTENELHR_					0	0	0	0	HEXI1_HUMANProteinHEXIM1	HEXI1_HUMANProteinHEXIM1	HEXI1_HUMANProteinHEXIM1	MSMS	FU20160819-05	560.63	3	560.629	1678.86	NaN	NaN	NaN	NaN	NaN	NaN	NaN	NaN	86.686	1	86.686	86.186	87.186	0								0	0	0	0.016317	1	48708	91.441
	AENLQLLTENELHR	14	Unmodified	_AENLQLLTENELHR_					0	0	0	0	HEXI1_HUMANProteinHEXIM1	HEXI1_HUMANProteinHEXIM1	HEXI1_HUMANProteinHEXIM1	MSMS	FU20160819-05	560.63	3	560.629	1678.86	NaN	NaN	NaN	NaN	NaN	NaN	NaN	NaN	87.293	1	87.293	86.793	87.793	0								0	0	0	0.009118	1	49348	101.61
	AENLQLLTENELHR	14	Unmodified	_AENLQLLTENELHR_					0	0	0	0	HEXI1_HUMANProteinHEXIM1	HEXI1_HUMANProteinHEXIM1	HEXI1_HUMANProteinHEXIM1	MSMS	FU20160819-05	560.63	3	560.629	1678.86	NaN	NaN	NaN	NaN	NaN	NaN	NaN	NaN	92.644	1	92.644	92.144	93.144	-7.6294e-06								0	0	0	2.0937e-20	1	54787	138.55
	AENLQLLTENELHR	14	Unmodified	_AENLQLLTENELHR_					0	0	0	0	HEXI1_HUMANProteinHEXIM1	HEXI1_HUMANProteinHEXIM1	HEXI1_HUMANProteinHEXIM1	MSMS	FU20160819-05	560.629	3	560.629	1678.86	NaN	NaN	NaN	NaN	NaN	NaN	NaN	NaN	93.416	1	93.416	92.916	93.916	0								0	0	0	4.4994e-05	1	55444	121.76
	AENLQLLTENELHR	14	Unmodified	_AENLQLLTENELHR_					0	0	0	0	HEXI1_HUMANProteinHEXIM1	HEXI1_HUMANProteinHEXIM1	HEXI1_HUMANProteinHEXIM1	MSMS	FU20160819-05	560.633	3	560.629	1678.86	NaN	NaN	NaN	NaN	NaN	NaN	NaN	NaN	95.91	1	95.91	95.41	96.41	0								0	0	0	0.02409	1	57666	88.282
	AENLQLLTENELHR	14	Unmodified	_AENLQLLTENELHR_					0	0	0	0	HEXI1_HUMANProteinHEXIM1	HEXI1_HUMANProteinHEXIM1	HEXI1_HUMANProteinHEXIM1	MSMS	FU20160819-05	560.629	3	560.629	1678.86	NaN	NaN	NaN	NaN	NaN	NaN	NaN	NaN	96.319	1	96.319	95.819	96.819	0								0	0	0	8.5117e-09	1	58050	130.61
	AENLQLLTENELHR	14	Unmodified	_AENLQLLTENELHR_					0	0	0	0	HEXI1_HUMANProteinHEXIM1	HEXI1_HUMANProteinHEXIM1	HEXI1_HUMANProteinHEXIM1	MSMS	FU20160819-05	560.63	3	560.629	1678.86	NaN	NaN	NaN	NaN	NaN	NaN	NaN	NaN	98.574	1	98.574	98.074	99.074	0								0	0	0	0.0089143	1	59692	108.23
	AENLQLLTENELHR	14	Unmodified	_AENLQLLTENELHR_					0	0	0	0	HEXI1_HUMANProteinHEXIM1	HEXI1_HUMANProteinHEXIM1	HEXI1_HUMANProteinHEXIM1	MSMS	FU20160819-05	560.631	3	560.629	1678.86	NaN	NaN	NaN	NaN	NaN	NaN	NaN	NaN	98.968	1	98.968	98.468	99.468	0								0	0	0	0.0042241	1	59976	111.83
	AENLQLLTENELHR	14	Unmodified	_AENLQLLTENELHR_					0	0	0	0	HEXI1_HUMANProteinHEXIM1	HEXI1_HUMANProteinHEXIM1	HEXI1_HUMANProteinHEXIM1	MSMS	FU20160819-05	560.631	3	560.629	1678.86	NaN	NaN	NaN	NaN	NaN	NaN	NaN	NaN	106.32	1	106.32	105.82	106.82	7.6294e-06								0	0	0	4.602e-08	1	65702	126.56
	AENLQLLTENELHR	14	Unmodified	_AENLQLLTENELHR_					0	0	0	0	HEXI1_HUMANProteinHEXIM1	HEXI1_HUMANProteinHEXIM1	HEXI1_HUMANProteinHEXIM1	MULTI-SECPEP	FU20160819-05	560.964	3	560.629	1678.86	80634.7	2.5958	0.0014553	-0.28343	-0.0001589	2.3123	0.0012964	560.628	47.205	0.29325	47.205	47.137	47.43	0					72	37	3	0	0	0	0.0025356	1	18722	132.24
	AENLQLLTENELHR	14	Unmodified	_AENLQLLTENELHR_					0	0	0	0	HEXI1_HUMANProteinHEXIM1	HEXI1_HUMANProteinHEXIM1	HEXI1_HUMANProteinHEXIM1	MULTI-SECPEP	FU20160819-05	560.957	3	560.629	1678.86	84821.2	2.2119	0.0012401	-0.75109	-0.00042108	1.4609	0.000819	560.628	68.706	0.090988	68.706	68.687	68.778	0					12	10	2	0	0	0	1.6002e-36	1	32773	181.76
	AENLQLLTENELHR	14	Unmodified	_AENLQLLTENELHR_					0	0	0	0	HEXI1_HUMANProteinHEXIM1	HEXI1_HUMANProteinHEXIM1	HEXI1_HUMANProteinHEXIM1	MULTI-SECPEP	FU20160819-05	560.789	3	560.629	1678.86	78987.2	3.6088	0.0020232	-0.00036176	-2.0281e-07	3.6084	0.002023	560.629	95.971	0.14943	95.971	95.914	96.063	0					14	9	2	0	0	0	1.6597e-78	1	57729	205.96
	AENLQLLTENELHR	14	Unmodified	_AENLQLLTENELHR_					0	0	0	0	HEXI1_HUMANProteinHEXIM1	HEXI1_HUMANProteinHEXIM1	HEXI1_HUMANProteinHEXIM1	MULTI-MSMS	FU20160819-07	560.63	3	560.629	1678.86	78414.1	1.8496	0.001037	-0.067447	-3.7813e-05	1.7822	0.00099915	560.629	61.499	0.3794	61.499	61.208	61.587	0					281	50	7	0	0	0	1.4219e-25	1	26476	175.6
	AENLQLLTENELHR	14	Unmodified	_AENLQLLTENELHR_					0	0	0	0	HEXI1_HUMANProteinHEXIM1	HEXI1_HUMANProteinHEXIM1	HEXI1_HUMANProteinHEXIM1	MULTI-MSMS	FU20160819-07	840.441	2	840.439	1678.86	66202	2.4763	0.0020812	-0.08309	-6.9832e-05	2.3932	0.0020113	840.439	61.431	0.31966	61.431	61.231	61.551	3.8147e-06					149	42	7	0	0	0	0	1	26489	287.76
	AENLQLLTENELHR	14	Unmodified	_AENLQLLTENELHR_					0	0	0	0	HEXI1_HUMANProteinHEXIM1	HEXI1_HUMANProteinHEXIM1	HEXI1_HUMANProteinHEXIM1	MULTI-MSMS	FU20160819-07	560.629	3	560.629	1678.86	78539.3	1.8826	0.0010554	-0.19167	-0.00010746	1.6909	0.00094799	560.628	61.605	0.10812	61.605	61.551	61.659	0					83	14	6	0	0	0	1.0691e-76	1	26654	201.08
	AENLQLLTENELHR	14	Unmodified	_AENLQLLTENELHR_					0	0	0	0	HEXI1_HUMANProteinHEXIM1	HEXI1_HUMANProteinHEXIM1	HEXI1_HUMANProteinHEXIM1	MULTI-MSMS	FU20160819-07	840.441	2	840.439	1678.86	66202	2.5058	0.002106	-0.21996	-0.00018486	2.2858	0.0019211	840.439	61.612	0.21221	61.612	61.456	61.668	0					91	28	6	0	0	0	3.3293e-62	1	26657	204.48
	AENLQLLTENELHR	14	Unmodified	_AENLQLLTENELHR_					0	0	0	0	HEXI1_HUMANProteinHEXIM1	HEXI1_HUMANProteinHEXIM1	HEXI1_HUMANProteinHEXIM1	MULTI-MSMS	FU20160819-07	560.63	3	560.629	1678.86	79037.1	1.9686	0.0011036	-0.25027	-0.00014031	1.7183	0.00096334	560.629	61.935	1.1997	61.935	61.881	63.08	0					488	159	4	0	0	0	3.2498e-77	4	26820	204.18
	AENLQLLTENELHR	14	Unmodified	_AENLQLLTENELHR_					0	0	0	0	HEXI1_HUMANProteinHEXIM1	HEXI1_HUMANProteinHEXIM1	HEXI1_HUMANProteinHEXIM1	MULTI-MSMS	FU20160819-07	840.442	2	840.439	1678.86	66301.1	2.5853	0.0021727	-0.13305	-0.00011182	2.4522	0.0020609	840.439	61.921	0.65897	61.921	61.881	62.54	0					247	88	3	0	0	0	5.0758e-204	2	26984	242.97
	AENLQLLTENELHR	14	Unmodified	_AENLQLLTENELHR_					0	0	0	0	HEXI1_HUMANProteinHEXIM1	HEXI1_HUMANProteinHEXIM1	HEXI1_HUMANProteinHEXIM1	MULTI-MSMS	FU20160819-07	840.442	2	840.439	1678.86	66341.2	2.6882	0.0022593	0.046967	3.9473e-05	2.7352	0.0022987	840.439	62.657	0.19648	62.657	62.526	62.722	0					86	26	5	0	0	0	3.6285e-204	1	27134	225.79
	AENLQLLTENELHR	14	Unmodified	_AENLQLLTENELHR_					0	0	0	0	HEXI1_HUMANProteinHEXIM1	HEXI1_HUMANProteinHEXIM1	HEXI1_HUMANProteinHEXIM1	MULTI-MSMS	FU20160819-07	840.442	2	840.439	1678.86	66321.1	2.7256	0.0022907	0.25602	0.00021517	2.9816	0.0025059	840.439	62.884	0.34072	62.884	62.722	63.063	0					81	43	4	0	0	0	8.7496e-111	1	27312	208.08
	AENLQLLTENELHR	14	Unmodified	_AENLQLLTENELHR_					0	0	0	0	HEXI1_HUMANProteinHEXIM1	HEXI1_HUMANProteinHEXIM1	HEXI1_HUMANProteinHEXIM1	MULTI-MSMS	FU20160819-07	560.964	3	560.629	1678.86	79037.1	2.1128	0.0011845	0.19222	0.00010776	2.305	0.0012922	560.629	63.113	0.27784	63.113	63.08	63.358	0					107	36	4	0	0	0	1.0965e-10	1	27482	158.52
	AENLQLLTENELHR	14	Unmodified	_AENLQLLTENELHR_					0	0	0	0	HEXI1_HUMANProteinHEXIM1	HEXI1_HUMANProteinHEXIM1	HEXI1_HUMANProteinHEXIM1	MULTI-MSMS	FU20160819-07	840.942	2	840.439	1678.86	66222	2.7363	0.0022997	0.058704	4.9337e-05	2.795	0.002349	840.439	63.091	0.28122	63.091	63.063	63.344	3.8147e-06					64	36	2	0	0	0	1.442e-39	1	27488	186.76
	AENLQLLTENELHR	14	Unmodified	_AENLQLLTENELHR_					0	0	0	0	HEXI1_HUMANProteinHEXIM1	HEXI1_HUMANProteinHEXIM1	HEXI1_HUMANProteinHEXIM1	MULTI-MSMS	FU20160819-07	560.964	3	560.629	1678.86	78665.1	2.1092	0.0011825	0.26221	0.000147	2.3714	0.0013295	560.629	63.507	0.37006	63.507	63.358	63.728	0					98	49	3	0	0	0	5.9438e-50	1	27660	190.57
	AENLQLLTENELHR	14	Unmodified	_AENLQLLTENELHR_					0	0	0	0	HEXI1_HUMANProteinHEXIM1	HEXI1_HUMANProteinHEXIM1	HEXI1_HUMANProteinHEXIM1	MULTI-MSMS	FU20160819-07	840.943	2	840.439	1678.86	66341.2	2.7366	0.0023	-0.10729	-9.0171e-05	2.6293	0.0022098	840.941	63.689	0.28249	63.689	63.439	63.721	0					69	37	3	0	0	0	2.4145e-16	1	27668	190.78
	AENLQLLTENELHR	14	Unmodified	_AENLQLLTENELHR_					0	0	0	0	HEXI1_HUMANProteinHEXIM1	HEXI1_HUMANProteinHEXIM1	HEXI1_HUMANProteinHEXIM1	MULTI-MSMS	FU20160819-07	560.63	3	560.629	1678.86	78539.4	2.1122	0.0011842	0.25396	0.00014238	2.3662	0.0013266	560.629	64.028	0.31781	64.028	63.87	64.187	0					105	38	4	0	0	0	4.5184e-25	1	27846	174.94
	AENLQLLTENELHR	14	Unmodified	_AENLQLLTENELHR_					0	0	0	0	HEXI1_HUMANProteinHEXIM1	HEXI1_HUMANProteinHEXIM1	HEXI1_HUMANProteinHEXIM1	MULTI-MSMS	FU20160819-07	840.441	2	840.439	1678.86	66341.1	2.7373	0.0023005	-0.5524	-0.00046426	2.1848	0.0018362	840.94	64.04	0.48891	64.04	63.87	64.359	0					116	61	3	0	0	0	0	3	27855	279.62
	AENLQLLTENELHR	14	Unmodified	_AENLQLLTENELHR_					0	0	0	0	HEXI1_HUMANProteinHEXIM1	HEXI1_HUMANProteinHEXIM1	HEXI1_HUMANProteinHEXIM1	MULTI-MSMS	FU20160819-07	560.63	3	560.629	1678.86	78665.1	2.109	0.0011824	0.44009	0.00024673	2.5491	0.0014291	560.629	64.361	0.53275	64.361	64.151	64.684	0					152	69	3	0	0	0	1.0244e-16	2	28083	164.88
	AENLQLLTENELHR	14	Unmodified	_AENLQLLTENELHR_					0	0	0	0	HEXI1_HUMANProteinHEXIM1	HEXI1_HUMANProteinHEXIM1	HEXI1_HUMANProteinHEXIM1	MULTI-MSMS	FU20160819-07	840.944	2	840.439	1678.86	67814.9	2.7384	0.0023015	1.3821	0.0011616	4.1206	0.0034631	840.942	64.726	0.048553	64.726	64.699	64.747	0					9	5	2	0	0	0	6.6927e-40	1	28339	199.8
	AENLQLLTENELHR	14	Unmodified	_AENLQLLTENELHR_					0	0	0	0	HEXI1_HUMANProteinHEXIM1	HEXI1_HUMANProteinHEXIM1	HEXI1_HUMANProteinHEXIM1	MULTI-MSMS	FU20160819-07	560.964	3	560.629	1678.86	79571.8	2.1068	0.0011811	0.53348	0.00029909	2.6403	0.0014802	560.629	64.927	0.33859	64.927	64.755	65.094	0					70	41	2	0	0	0	0.00011388	1	28487	148.41
	AENLQLLTENELHR	14	Unmodified	_AENLQLLTENELHR_					0	0	0	0	HEXI1_HUMANProteinHEXIM1	HEXI1_HUMANProteinHEXIM1	HEXI1_HUMANProteinHEXIM1	MULTI-MSMS	FU20160819-07	840.443	2	840.439	1678.86	64266.8	2.7409	0.0023035	0.10455	8.7869e-05	2.8454	0.0023914	840.44	65.021	0.2235	65.021	64.892	65.115	0					48	26	3	0	0	0	1.1168e-92	1	28554	206.74
	AENLQLLTENELHR	14	Unmodified	_AENLQLLTENELHR_					0	0	0	0	HEXI1_HUMANProteinHEXIM1	HEXI1_HUMANProteinHEXIM1	HEXI1_HUMANProteinHEXIM1	MULTI-MSMS	FU20160819-07	560.63	3	560.629	1678.86	79571.8	2.1323	0.0011954	0.24527	0.0001375	2.3775	0.0013329	560.629	65.164	0.32624	65.164	65.094	65.42	0					70	38	2	0	0	0	4.5184e-25	1	28767	174.94
	AENLQLLTENELHR	14	Unmodified	_AENLQLLTENELHR_					0	0	0	0	HEXI1_HUMANProteinHEXIM1	HEXI1_HUMANProteinHEXIM1	HEXI1_HUMANProteinHEXIM1	MULTI-MSMS	FU20160819-07	560.63	3	560.629	1678.86	77190.9	2.3576	0.0013217	0.57089	0.00032006	2.9285	0.0016418	560.629	67.184	0.5081	67.184	66.891	67.399	0					157	54	4	0	0	0	7.3198e-63	1	30152	198.29
	AENLQLLTENELHR	14	Unmodified	_AENLQLLTENELHR_					0	0	0	0	HEXI1_HUMANProteinHEXIM1	HEXI1_HUMANProteinHEXIM1	HEXI1_HUMANProteinHEXIM1	MULTI-MSMS	FU20160819-07	840.442	2	840.439	1678.86	64720.3	2.9938	0.0025161	0.29341	0.0002466	3.2873	0.0027627	840.439	67.198	0.23181	67.198	67.057	67.289	0					65	22	4	0	0	0	1.2886e-77	1	30395	221.8
	AENLQLLTENELHR	14	Unmodified	_AENLQLLTENELHR_					0	0	0	0	HEXI1_HUMANProteinHEXIM1	HEXI1_HUMANProteinHEXIM1	HEXI1_HUMANProteinHEXIM1	MULTI-MSMS	FU20160819-07	560.63	3	560.629	1678.86	76946	2.2941	0.0012861	0.27712	0.00015536	2.5712	0.0014415	560.629	67.661	0.60578	67.661	67.298	67.904	0					179	69	3	0	0	0	7.7573e-26	2	30809	175.74
	AENLQLLTENELHR	14	Unmodified	_AENLQLLTENELHR_					0	0	0	0	HEXI1_HUMANProteinHEXIM1	HEXI1_HUMANProteinHEXIM1	HEXI1_HUMANProteinHEXIM1	MULTI-MSMS	FU20160819-07	840.441	2	840.439	1678.86	66531.8	2.9156	0.0024504	-0.20876	-0.00017545	2.7068	0.0022749	840.439	67.661	0.44374	67.661	67.36	67.803	0					97	51	3	0	0	0	0.017135	1	30727	117.79
	AENLQLLTENELHR	14	Unmodified	_AENLQLLTENELHR_					0	0	0	0	HEXI1_HUMANProteinHEXIM1	HEXI1_HUMANProteinHEXIM1	HEXI1_HUMANProteinHEXIM1	MULTI-MSMS	FU20160819-07	560.964	3	560.629	1678.86	79979.4	2.1322	0.0011954	0.084937	4.7618e-05	2.2172	0.001243	560.629	68.396	0.40002	68.396	68.165	68.565	0					90	47	3	0	0	0	2.889e-07	1	31520	157.2
	AENLQLLTENELHR	14	Unmodified	_AENLQLLTENELHR_					0	0	0	0	HEXI1_HUMANProteinHEXIM1	HEXI1_HUMANProteinHEXIM1	HEXI1_HUMANProteinHEXIM1	MULTI-MSMS	FU20160819-07	560.965	3	560.629	1678.86	80764.3	2.0763	0.001164	0.33373	0.0001871	2.41	0.0013511	560.963	68.729	0.33961	68.729	68.534	68.873	-7.6294e-06					81	37	3	0	0	0	0.00016453	1	31852	138.55
	AENLQLLTENELHR	14	Unmodified	_AENLQLLTENELHR_					0	0	0	0	HEXI1_HUMANProteinHEXIM1	HEXI1_HUMANProteinHEXIM1	HEXI1_HUMANProteinHEXIM1	MULTI-MSMS	FU20160819-07	560.631	3	560.629	1678.86	85615.3	3.0595	0.0017153	-0.47789	-0.00026792	2.5816	0.0014473	560.628	72.804	0.13144	72.804	72.768	72.9	0					17	13	2	0	0	0	1.0965e-10	1	34755	158.52
	AENLQLLTENELHR	14	Unmodified	_AENLQLLTENELHR_					0	0	0	0	HEXI1_HUMANProteinHEXIM1	HEXI1_HUMANProteinHEXIM1	HEXI1_HUMANProteinHEXIM1	MULTI-MSMS	FU20160819-07	560.963	3	560.629	1678.86	79904.4	2.263	0.0012687	-0.871	-0.00048831	1.392	0.0007804	560.962	77.077	0.075378	77.077	77.035	77.111	0					13	5	4	0	0	0	2.4549e-50	2	38185	192.4
	AENLQLLTENELHR	14	Unmodified	_AENLQLLTENELHR_					0	0	0	0	HEXI1_HUMANProteinHEXIM1	HEXI1_HUMANProteinHEXIM1	HEXI1_HUMANProteinHEXIM1	MULTI-MSMS	FU20160819-07	560.63	3	560.629	1678.86	81857.4	1.1332	0.00063529	0.81698	0.00045802	1.9501	0.0010933	560.629	87.045	0.070816	87.045	87.031	87.102	0					17	6	4	0	0	0	2.8777e-50	1	47556	192.18
	AENLQLLTENELHR	14	Unmodified	_AENLQLLTENELHR_					0	0	0	0	HEXI1_HUMANProteinHEXIM1	HEXI1_HUMANProteinHEXIM1	HEXI1_HUMANProteinHEXIM1	MULTI-MSMS	FU20160819-07	560.964	3	560.629	1678.86	82811.7	2.0159	0.0011302	0.2651	0.00014862	2.281	0.0012788	560.963	95.227	0.13551	95.227	95.216	95.352	0					24	13	3	0	0	0	7.3198e-63	1	54976	198.29
	AENLQLLTENELHR	14	Unmodified	_AENLQLLTENELHR_					0	0	0	0	HEXI1_HUMANProteinHEXIM1	HEXI1_HUMANProteinHEXIM1	HEXI1_HUMANProteinHEXIM1	MULTI-MSMS	FU20160819-07	560.964	3	560.629	1678.86	80497.5	2.0373	0.0011422	0.22274	0.00012488	2.2601	0.0012671	560.963	100.7	0.040733	100.7	100.68	100.72	0					7	3	3	0	0	0	5.6496e-11	1	60258	161.21
	AENLQLLTENELHR	14	Unmodified	_AENLQLLTENELHR_					0	0	0	0	HEXI1_HUMANProteinHEXIM1	HEXI1_HUMANProteinHEXIM1	HEXI1_HUMANProteinHEXIM1	MULTI-MSMS	FU20160819-07	560.964	3	560.629	1678.86	79473.9	2.0245	0.001135	0.53622	0.00030062	2.5608	0.0014356	560.629	104.15	0.11198	104.15	104.12	104.23	-7.6294e-06					20	8	4	0	0	0	4.8082e-31	1	63236	177.21
	AENLQLLTENELHR	14	Unmodified	_AENLQLLTENELHR_					0	0	0	0	HEXI1_HUMANProteinHEXIM1	HEXI1_HUMANProteinHEXIM1	HEXI1_HUMANProteinHEXIM1	MSMS	FU20160819-07	560.63	3	560.629	1678.86	NaN	NaN	NaN	NaN	NaN	NaN	NaN	NaN	66.63	1	66.63	66.13	67.13	0								0	0	0	5.2454e-78	1	29829	171.36
	AENLQLLTENELHR	14	Unmodified	_AENLQLLTENELHR_					0	0	0	0	HEXI1_HUMANProteinHEXIM1	HEXI1_HUMANProteinHEXIM1	HEXI1_HUMANProteinHEXIM1	MSMS	FU20160819-07	560.63	3	560.629	1678.86	NaN	NaN	NaN	NaN	NaN	NaN	NaN	NaN	68.147	1	68.147	67.647	68.647	0								0	0	0	1.7811e-51	1	31233	157.86
	AENLQLLTENELHR	14	Unmodified	_AENLQLLTENELHR_					0	0	0	0	HEXI1_HUMANProteinHEXIM1	HEXI1_HUMANProteinHEXIM1	HEXI1_HUMANProteinHEXIM1	MSMS	FU20160819-07	560.63	3	560.629	1678.86	NaN	NaN	NaN	NaN	NaN	NaN	NaN	NaN	69.866	1	69.866	69.366	70.366	0								0	0	0	3.1214e-41	1	32778	154.72
	AENLQLLTENELHR	14	Unmodified	_AENLQLLTENELHR_					0	0	0	0	HEXI1_HUMANProteinHEXIM1	HEXI1_HUMANProteinHEXIM1	HEXI1_HUMANProteinHEXIM1	MSMS	FU20160819-07	560.63	3	560.629	1678.86	NaN	NaN	NaN	NaN	NaN	NaN	NaN	NaN	72.237	1	72.237	71.737	72.737	0								0	0	0	1.4958e-29	1	34350	143.94
	AENLQLLTENELHR	14	Unmodified	_AENLQLLTENELHR_					0	0	0	0	HEXI1_HUMANProteinHEXIM1	HEXI1_HUMANProteinHEXIM1	HEXI1_HUMANProteinHEXIM1	MSMS	FU20160819-07	560.63	3	560.629	1678.86	NaN	NaN	NaN	NaN	NaN	NaN	NaN	NaN	80.26	1	80.26	79.76	80.76	-7.6294e-06								0	0	0	0.029718	1	41152	86.738
	AENLQLLTENELHR	14	Unmodified	_AENLQLLTENELHR_					0	0	0	0	HEXI1_HUMANProteinHEXIM1	HEXI1_HUMANProteinHEXIM1	HEXI1_HUMANProteinHEXIM1	MULTI-MSMS	FU20160819-08	560.63	3	560.629	1678.86	82307.3	2.7355	0.0015336	-0.37406	-0.00020971	2.3614	0.0013239	560.628	60.893	0.14073	60.893	60.813	60.954	3.8147e-06					27	16	3	0	0	0	0.0058196	1	27238	98.582
	AENLQLLTENELHR	14	Unmodified	_AENLQLLTENELHR_					0	0	0	0	HEXI1_HUMANProteinHEXIM1	HEXI1_HUMANProteinHEXIM1	HEXI1_HUMANProteinHEXIM1	MULTI-MSMS	FU20160819-08	560.63	3	560.629	1678.86	78632.4	2.6343	0.0014769	-0.90288	-0.00050618	1.7314	0.0009707	560.628	61.472	0.19927	61.472	61.347	61.546	0					131	22	7	0	0	0	2.0371e-62	1	27621	195.94
	AENLQLLTENELHR	14	Unmodified	_AENLQLLTENELHR_					0	0	0	0	HEXI1_HUMANProteinHEXIM1	HEXI1_HUMANProteinHEXIM1	HEXI1_HUMANProteinHEXIM1	MULTI-MSMS	FU20160819-08	840.441	2	840.439	1678.86	65584	2.4307	0.0020428	-0.13624	-0.0001145	2.2944	0.0019283	840.439	61.474	0.32217	61.474	61.347	61.669	0					128	39	5	0	0	0	0	1	27622	299.2
	AENLQLLTENELHR	14	Unmodified	_AENLQLLTENELHR_					0	0	0	0	HEXI1_HUMANProteinHEXIM1	HEXI1_HUMANProteinHEXIM1	HEXI1_HUMANProteinHEXIM1	MULTI-MSMS	FU20160819-08	840.443	2	840.439	1678.86	65584.1	2.3752	0.0019962	-0.05846	-4.9132e-05	2.3167	0.0019471	840.439	61.587	0.20667	61.587	61.561	61.767	0					135	27	7	0	0	0	0.001239	1	27793	151.13
	AENLQLLTENELHR	14	Unmodified	_AENLQLLTENELHR_					0	0	0	0	HEXI1_HUMANProteinHEXIM1	HEXI1_HUMANProteinHEXIM1	HEXI1_HUMANProteinHEXIM1	MULTI-MSMS	FU20160819-08	840.441	2	840.439	1678.86	65584.3	2.2815	0.0019174	-0.2081	-0.0001749	2.0734	0.0017425	840.439	61.918	0.20492	61.918	61.882	62.087	3.8147e-06					127	26	6	0	0	0	8.3711e-94	1	27963	209.64
	AENLQLLTENELHR	14	Unmodified	_AENLQLLTENELHR_					0	0	0	0	HEXI1_HUMANProteinHEXIM1	HEXI1_HUMANProteinHEXIM1	HEXI1_HUMANProteinHEXIM1	MULTI-MSMS	FU20160819-08	560.964	3	560.629	1678.86	78937.4	2.3344	0.0013087	-0.204	-0.00011437	2.1304	0.0011944	560.628	62.378	0.4176	62.378	62.328	62.745	0					137	53	6	0	0	0	2.4549e-50	2	28331	192.4
	AENLQLLTENELHR	14	Unmodified	_AENLQLLTENELHR_					0	0	0	0	HEXI1_HUMANProteinHEXIM1	HEXI1_HUMANProteinHEXIM1	HEXI1_HUMANProteinHEXIM1	MULTI-MSMS	FU20160819-08	840.942	2	840.439	1678.86	65584.3	2.1418	0.0018001	0.4771	0.00040098	2.6189	0.002201	840.44	62.381	0.25247	62.381	62.34	62.592	0					57	31	4	0	0	0	1.051e-231	1	28150	260.57
	AENLQLLTENELHR	14	Unmodified	_AENLQLLTENELHR_					0	0	0	0	HEXI1_HUMANProteinHEXIM1	HEXI1_HUMANProteinHEXIM1	HEXI1_HUMANProteinHEXIM1	MULTI-MSMS	FU20160819-08	840.442	2	840.439	1678.86	66704.4	2.0591	0.0017306	0.20125	0.00016914	2.2604	0.0018997	840.439	62.665	0.196	62.665	62.592	62.788	-3.8147e-06					78	26	4	0	0	0	1.1168e-92	1	28333	206.74
	AENLQLLTENELHR	14	Unmodified	_AENLQLLTENELHR_					0	0	0	0	HEXI1_HUMANProteinHEXIM1	HEXI1_HUMANProteinHEXIM1	HEXI1_HUMANProteinHEXIM1	MULTI-MSMS	FU20160819-08	840.943	2	840.439	1678.86	66293.1	1.9692	0.001655	0.36416	0.00030605	2.3334	0.001961	840.941	63.226	0.49767	63.226	62.98	63.478	0					101	64	3	0	0	0	5.903e-32	1	28514	215.53
	AENLQLLTENELHR	14	Unmodified	_AENLQLLTENELHR_					0	0	0	0	HEXI1_HUMANProteinHEXIM1	HEXI1_HUMANProteinHEXIM1	HEXI1_HUMANProteinHEXIM1	MULTI-MSMS	FU20160819-08	560.63	3	560.629	1678.86	78744.6	2.1693	0.0012162	0.016041	8.9931e-06	2.1854	0.0012252	560.963	63.071	0.21187	63.071	63.016	63.228	3.8147e-06					103	28	4	0	0	0	7.4197e-179	1	28516	234.04
	AENLQLLTENELHR	14	Unmodified	_AENLQLLTENELHR_					0	0	0	0	HEXI1_HUMANProteinHEXIM1	HEXI1_HUMANProteinHEXIM1	HEXI1_HUMANProteinHEXIM1	MULTI-MSMS	FU20160819-08	560.631	3	560.629	1678.86	78744.6	2.1902	0.0012279	0.19213	0.00010771	2.3823	0.0013356	560.963	63.371	0.29238	63.371	63.221	63.513	-3.8147e-06					114	36	4	0	0	0	2.1104e-111	1	28711	214.47
	AENLQLLTENELHR	14	Unmodified	_AENLQLLTENELHR_					0	0	0	0	HEXI1_HUMANProteinHEXIM1	HEXI1_HUMANProteinHEXIM1	HEXI1_HUMANProteinHEXIM1	MULTI-MSMS	FU20160819-08	840.442	2	840.439	1678.86	66808.2	2.0205	0.0016981	-0.6295	-0.00052906	1.391	0.0011691	840.94	63.778	0.16897	63.778	63.679	63.848	-3.8147e-06					35	22	3	0	0	0	0	1	28896	274.8
	AENLQLLTENELHR	14	Unmodified	_AENLQLLTENELHR_					0	0	0	0	HEXI1_HUMANProteinHEXIM1	HEXI1_HUMANProteinHEXIM1	HEXI1_HUMANProteinHEXIM1	MULTI-MSMS	FU20160819-08	560.63	3	560.629	1678.86	78744.6	2.21	0.001239	0.17452	9.784e-05	2.3846	0.0013369	560.629	63.687	0.28896	63.687	63.499	63.788	3.8147e-06					89	38	4	0	0	0	5.3983e-77	1	28898	203.29
	AENLQLLTENELHR	14	Unmodified	_AENLQLLTENELHR_					0	0	0	0	HEXI1_HUMANProteinHEXIM1	HEXI1_HUMANProteinHEXIM1	HEXI1_HUMANProteinHEXIM1	MULTI-MSMS	FU20160819-08	560.63	3	560.629	1678.86	79565.2	2.2439	0.001258	0.6202	0.0003477	2.8641	0.0016057	560.629	64.148	0.25535	64.148	63.931	64.186	0					60	32	2	0	0	0	2.8715e-25	1	29099	175.29
	AENLQLLTENELHR	14	Unmodified	_AENLQLLTENELHR_					0	0	0	0	HEXI1_HUMANProteinHEXIM1	HEXI1_HUMANProteinHEXIM1	HEXI1_HUMANProteinHEXIM1	MULTI-MSMS	FU20160819-08	840.942	2	840.439	1678.86	66010.4	2.0791	0.0017473	-0.4154	-0.00034912	1.6637	0.0013982	840.439	64.508	0.28948	64.508	64.443	64.733	0					44	36	3	0	0	0	0.0023042	1	29334	134.49
	AENLQLLTENELHR	14	Unmodified	_AENLQLLTENELHR_					0	0	0	0	HEXI1_HUMANProteinHEXIM1	HEXI1_HUMANProteinHEXIM1	HEXI1_HUMANProteinHEXIM1	MULTI-MSMS	FU20160819-08	560.63	3	560.629	1678.86	78920.5	2.2961	0.0012873	0.54161	0.00030364	2.8377	0.0015909	560.629	64.793	0.37907	64.793	64.443	64.822	0					117	47	5	0	0	0	5.448e-40	1	29537	186.51
	AENLQLLTENELHR	14	Unmodified	_AENLQLLTENELHR_					0	0	0	0	HEXI1_HUMANProteinHEXIM1	HEXI1_HUMANProteinHEXIM1	HEXI1_HUMANProteinHEXIM1	MULTI-MSMS	FU20160819-08	840.44	2	840.439	1678.86	66377.3	2.1188	0.0017807	0.80465	0.00067626	2.9234	0.0024569	840.441	64.869	0.10861	64.869	64.83	64.938	0					25	13	3	0	0	0	3.2099e-24	1	29580	178.95
	AENLQLLTENELHR	14	Unmodified	_AENLQLLTENELHR_					0	0	0	0	HEXI1_HUMANProteinHEXIM1	HEXI1_HUMANProteinHEXIM1	HEXI1_HUMANProteinHEXIM1	MULTI-MSMS	FU20160819-08	560.964	3	560.629	1678.86	77398.7	2.3998	0.0013454	-0.13173	-7.3849e-05	2.2681	0.0012715	560.963	65.194	0.31109	65.194	65.086	65.397	0					92	37	4	0	0	0	5.1014e-50	1	29782	191.01
	AENLQLLTENELHR	14	Unmodified	_AENLQLLTENELHR_					0	0	0	0	HEXI1_HUMANProteinHEXIM1	HEXI1_HUMANProteinHEXIM1	HEXI1_HUMANProteinHEXIM1	MULTI-MSMS	FU20160819-08	840.944	2	840.439	1678.86	64161	2.1945	0.0018444	0.93705	0.00078754	3.1316	0.0026319	840.942	65.196	0.2635	65.196	65.094	65.358	0					60	31	4	0	0	0	1.3508e-06	1	29817	174.23
	AENLQLLTENELHR	14	Unmodified	_AENLQLLTENELHR_					0	0	0	0	HEXI1_HUMANProteinHEXIM1	HEXI1_HUMANProteinHEXIM1	HEXI1_HUMANProteinHEXIM1	MULTI-MSMS	FU20160819-08	560.63	3	560.629	1678.86	79565.1	2.4455	0.001371	-0.25643	-0.00014376	2.189	0.0012272	560.629	65.396	0.13557	65.396	65.358	65.493	0					21	16	2	0	0	0	1.944e-24	1	30015	171.73
	AENLQLLTENELHR	14	Unmodified	_AENLQLLTENELHR_					0	0	0	0	HEXI1_HUMANProteinHEXIM1	HEXI1_HUMANProteinHEXIM1	HEXI1_HUMANProteinHEXIM1	MULTI-MSMS	FU20160819-08	560.965	3	560.629	1678.86	78801.7	2.782	0.0015597	-0.41809	-0.0002344	2.3639	0.0013253	560.628	67.08	0.53165	67.08	66.817	67.349	0					91	55	2	0	0	0	2.4269e-31	1	31299	179.5
	AENLQLLTENELHR	14	Unmodified	_AENLQLLTENELHR_					0	0	0	0	HEXI1_HUMANProteinHEXIM1	HEXI1_HUMANProteinHEXIM1	HEXI1_HUMANProteinHEXIM1	MULTI-MSMS	FU20160819-08	840.943	2	840.439	1678.86	65637.7	2.5673	0.0021577	0.61585	0.00051759	3.1832	0.0026753	840.44	67.192	0.56425	67.192	66.896	67.46	0					114	57	3	0	0	0	0.00011543	1	31742	142.97
	AENLQLLTENELHR	14	Unmodified	_AENLQLLTENELHR_					0	0	0	0	HEXI1_HUMANProteinHEXIM1	HEXI1_HUMANProteinHEXIM1	HEXI1_HUMANProteinHEXIM1	MULTI-MSMS	FU20160819-08	560.965	3	560.629	1678.86	80422.1	2.6148	0.0014659	0.11747	6.5855e-05	2.7322	0.0015318	560.629	68.85	0.54633	68.85	68.456	69.003	-7.6294e-06					120	61	4	0	0	0	2.8715e-25	1	32895	175.29
	AENLQLLTENELHR	14	Unmodified	_AENLQLLTENELHR_					0	0	0	0	HEXI1_HUMANProteinHEXIM1	HEXI1_HUMANProteinHEXIM1	HEXI1_HUMANProteinHEXIM1	MULTI-MSMS	FU20160819-08	560.965	3	560.629	1678.86	79826.4	2.6197	0.0014687	0.025129	1.4088e-05	2.6449	0.0014828	560.629	69.055	0.24158	69.055	68.986	69.228	0					58	25	4	0	0	0	5.6587e-93	1	33212	206.45
	AENLQLLTENELHR	14	Unmodified	_AENLQLLTENELHR_					0	0	0	0	HEXI1_HUMANProteinHEXIM1	HEXI1_HUMANProteinHEXIM1	HEXI1_HUMANProteinHEXIM1	MULTI-MSMS	FU20160819-08	560.63	3	560.629	1678.86	80520.1	2.684	0.0015047	-0.43507	-0.00024391	2.2489	0.0012608	560.963	69.507	0.25951	69.507	69.39	69.649	0					55	23	3	0	0	0	7.1174e-11	1	33538	160.46
	AENLQLLTENELHR	14	Unmodified	_AENLQLLTENELHR_					0	0	0	0	HEXI1_HUMANProteinHEXIM1	HEXI1_HUMANProteinHEXIM1	HEXI1_HUMANProteinHEXIM1	MULTI-MSMS	FU20160819-08	560.63	3	560.629	1678.86	80401.3	2.8026	0.0015712	-0.0050863	-2.8516e-06	2.7975	0.0015684	560.628	75.211	0.030159	75.211	75.199	75.229	0					6	2	3	0	0	0	1.0965e-10	1	37993	158.52
	AENLQLLTENELHR	14	Unmodified	_AENLQLLTENELHR_					0	0	0	0	HEXI1_HUMANProteinHEXIM1	HEXI1_HUMANProteinHEXIM1	HEXI1_HUMANProteinHEXIM1	MULTI-MSMS	FU20160819-08	560.965	3	560.629	1678.86	88495	2.1343	0.0011965	0.44771	0.000251	2.582	0.0014475	560.963	77.275	0.055389	77.275	77.246	77.301	0					6	4	2	0	0	0	0.00024051	1	39694	128.95
	AENLQLLTENELHR	14	Unmodified	_AENLQLLTENELHR_					0	0	0	0	HEXI1_HUMANProteinHEXIM1	HEXI1_HUMANProteinHEXIM1	HEXI1_HUMANProteinHEXIM1	MULTI-MSMS	FU20160819-08	560.63	3	560.629	1678.86	79578.5	1.7343	0.00097228	0.79344	0.00044483	2.5277	0.0014171	560.629	78.508	0.070633	78.508	78.486	78.557	0					13	6	4	0	0	0	0.004186	1	40868	101.75
	AENLQLLTENELHR	14	Unmodified	_AENLQLLTENELHR_					0	0	0	0	HEXI1_HUMANProteinHEXIM1	HEXI1_HUMANProteinHEXIM1	HEXI1_HUMANProteinHEXIM1	MULTI-MSMS	FU20160819-08	560.965	3	560.629	1678.86	79487	2.7736	0.0015549	-0.056043	-3.1419e-05	2.7175	0.0015235	560.963	89.998	0.22619	89.998	89.942	90.168	7.6294e-06					39	18	4	0	0	0	5.9438e-50	1	51451	190.57
	AENLQLLTENELHR	14	Unmodified	_AENLQLLTENELHR_					0	0	0	0	HEXI1_HUMANProteinHEXIM1	HEXI1_HUMANProteinHEXIM1	HEXI1_HUMANProteinHEXIM1	MULTI-MSMS	FU20160819-08	560.629	3	560.629	1678.86	81778.4	3.1009	0.0017385	-2.161	-0.0012115	0.93991	0.00052694	560.627	94.324	0.034378	94.324	94.308	94.342	0					4	2	2	0	0	0	0.011298	1	55129	92.65
	AENLQLLTENELHR	14	Unmodified	_AENLQLLTENELHR_					0	0	0	0	HEXI1_HUMANProteinHEXIM1	HEXI1_HUMANProteinHEXIM1	HEXI1_HUMANProteinHEXIM1	MULTI-MSMS	FU20160819-08	560.63	3	560.629	1678.86	80436.5	3.4984	0.0019613	-0.51517	-0.00028882	2.9833	0.0016725	560.628	104.76	0.11995	104.76	104.75	104.87	0					34	11	5	0	0	0	0.00020484	1	64737	143.25
	AENLQLLTENELHR	14	Unmodified	_AENLQLLTENELHR_					0	0	0	0	HEXI1_HUMANProteinHEXIM1	HEXI1_HUMANProteinHEXIM1	HEXI1_HUMANProteinHEXIM1	MULTI-MSMS	FU20160819-08	560.965	3	560.629	1678.86	91157.3	3.9675	0.0022243	-0.8905	-0.00049924	3.077	0.001725	560.628	118	0.23534	118	117.86	118.1	0					26	24	2	0	0	0	0.0012588	1	76440	110.25
	AENLQLLTENELHR	14	Unmodified	_AENLQLLTENELHR_					0	0	0	0	HEXI1_HUMANProteinHEXIM1	HEXI1_HUMANProteinHEXIM1	HEXI1_HUMANProteinHEXIM1	MSMS	FU20160819-08	560.629	3	560.629	1678.86	NaN	NaN	NaN	NaN	NaN	NaN	NaN	NaN	62.062	1	62.062	61.562	62.562	0								0	0	0	2.2019e-51	1	27962	157.09
	AENLQLLTENELHR	14	Unmodified	_AENLQLLTENELHR_					0	0	0	0	HEXI1_HUMANProteinHEXIM1	HEXI1_HUMANProteinHEXIM1	HEXI1_HUMANProteinHEXIM1	MSMS	FU20160819-08	840.442	2	840.439	1678.86	NaN	NaN	NaN	NaN	NaN	NaN	NaN	NaN	64.124	1	64.124	63.624	64.624	0								0	0	0	2.6365e-249	1	29106	233.32
	AENLQLLTENELHR	14	Unmodified	_AENLQLLTENELHR_					0	0	0	0	HEXI1_HUMANProteinHEXIM1	HEXI1_HUMANProteinHEXIM1	HEXI1_HUMANProteinHEXIM1	MSMS	FU20160819-08	560.629	3	560.629	1678.86	NaN	NaN	NaN	NaN	NaN	NaN	NaN	NaN	64.448	1	64.448	63.948	64.948	0								0	0	0	1.7604e-195	1	29327	203.29
	AENLQLLTENELHR	14	Unmodified	_AENLQLLTENELHR_					0	0	0	0	HEXI1_HUMANProteinHEXIM1	HEXI1_HUMANProteinHEXIM1	HEXI1_HUMANProteinHEXIM1	MSMS	FU20160819-08	560.631	3	560.629	1678.86	NaN	NaN	NaN	NaN	NaN	NaN	NaN	NaN	66.263	1	66.263	65.763	66.763	0								0	0	0	1.1496e-92	1	30650	174.95
	AENLQLLTENELHR	14	Unmodified	_AENLQLLTENELHR_					0	0	0	0	HEXI1_HUMANProteinHEXIM1	HEXI1_HUMANProteinHEXIM1	HEXI1_HUMANProteinHEXIM1	MSMS	FU20160819-08	560.63	3	560.629	1678.86	NaN	NaN	NaN	NaN	NaN	NaN	NaN	NaN	66.613	1	66.613	66.113	67.113	0								0	0	0	1.0712e-279	1	30938	222.81
	AENLQLLTENELHR	14	Unmodified	_AENLQLLTENELHR_					0	0	0	0	HEXI1_HUMANProteinHEXIM1	HEXI1_HUMANProteinHEXIM1	HEXI1_HUMANProteinHEXIM1	MSMS	FU20160819-08	840.442	2	840.439	1678.86	NaN	NaN	NaN	NaN	NaN	NaN	NaN	NaN	67.117	1	67.117	66.617	67.617	0								0	0	0	1.1837e-170	1	31399	203.61
	AENLQLLTENELHR	14	Unmodified	_AENLQLLTENELHR_					0	0	0	0	HEXI1_HUMANProteinHEXIM1	HEXI1_HUMANProteinHEXIM1	HEXI1_HUMANProteinHEXIM1	MSMS	FU20160819-08	560.63	3	560.629	1678.86	NaN	NaN	NaN	NaN	NaN	NaN	NaN	NaN	70.226	1	70.226	69.726	70.726	0								0	0	0	2.3936e-40	1	34191	151.3
	AENLQLLTENELHR	14	Unmodified	_AENLQLLTENELHR_					0	0	0	0	HEXI1_HUMANProteinHEXIM1	HEXI1_HUMANProteinHEXIM1	HEXI1_HUMANProteinHEXIM1	MSMS	FU20160819-08	560.63	3	560.629	1678.86	NaN	NaN	NaN	NaN	NaN	NaN	NaN	NaN	73.192	1	73.192	72.692	73.692	0								0	0	0	5.5714e-78	1	36252	171.26
	AENLQLLTENELHR	14	Unmodified	_AENLQLLTENELHR_					0	0	0	0	HEXI1_HUMANProteinHEXIM1	HEXI1_HUMANProteinHEXIM1	HEXI1_HUMANProteinHEXIM1	MSMS	FU20160819-08	560.63	3	560.629	1678.86	NaN	NaN	NaN	NaN	NaN	NaN	NaN	NaN	87.41	1	87.41	86.91	87.91	0								0	0	0	1.6437e-13	1	48921	135.04
	AENLQLLTENELHR	14	Unmodified	_AENLQLLTENELHR_					0	0	0	0	HEXI1_HUMANProteinHEXIM1	HEXI1_HUMANProteinHEXIM1	HEXI1_HUMANProteinHEXIM1	MULTI-SECPEP	FU20160819-08	840.441	2	840.439	1678.86	65637.7	2.532	0.002128	0.24344	0.0002046	2.7754	0.0023326	840.439	67.566	0.4474	67.566	67.406	67.853	0					91	48	3	0	0	0	2.8133e-78	1	32078	172.76
	AENLQLLTENELHR	14	Unmodified	_AENLQLLTENELHR_					0	0	0	0	HEXI1_HUMANProteinHEXIM1	HEXI1_HUMANProteinHEXIM1	HEXI1_HUMANProteinHEXIM1	MULTI-SECPEP	FU20160819-08	560.342	3	560.629	1678.86	85665	3.969	0.0022252	-0.70352	-0.00039441	3.2655	0.0018307	560.628	119.77	0.45586	119.77	119.53	119.99	0					71	47	2	0	0	0	0.021559	1	78263	111.72
	AENLQLLTENELHR	14	Unmodified	_AENLQLLTENELHR_					0	0	0	0	HEXI1_HUMANProteinHEXIM1	HEXI1_HUMANProteinHEXIM1	HEXI1_HUMANProteinHEXIM1	MULTI-MSMS	FU20160819-10	560.964	3	560.629	1678.86	80250.8	2.8072	0.0015738	0.011299	6.3346e-06	2.8185	0.0015801	560.629	12.688	0.23503	12.688	12.547	12.782	-9.5367e-07					45	31	4	0	0	0	0.00016208	1	3448	146.77
	AENLQLLTENELHR	14	Unmodified	_AENLQLLTENELHR_					0	0	0	0	HEXI1_HUMANProteinHEXIM1	HEXI1_HUMANProteinHEXIM1	HEXI1_HUMANProteinHEXIM1	MULTI-MSMS	FU20160819-10	560.965	3	560.629	1678.86	86252.5	2.7909	0.0015647	0.42857	0.00024027	3.2195	0.0018049	560.629	13.694	0.054515	13.694	13.666	13.721	0					16	6	4	0	0	0	0.0026852	1	3817	105.03
	AENLQLLTENELHR	14	Unmodified	_AENLQLLTENELHR_					0	0	0	0	HEXI1_HUMANProteinHEXIM1	HEXI1_HUMANProteinHEXIM1	HEXI1_HUMANProteinHEXIM1	MULTI-MSMS	FU20160819-10	560.63	3	560.629	1678.86	81641.2	3.3974	0.0019047	-0.28082	-0.00015743	3.1166	0.0017472	560.628	26.63	0.036409	26.63	26.619	26.655	0					5	4	2	0	0	0	0.011065	1	10931	92.939
	AENLQLLTENELHR	14	Unmodified	_AENLQLLTENELHR_					0	0	0	0	HEXI1_HUMANProteinHEXIM1	HEXI1_HUMANProteinHEXIM1	HEXI1_HUMANProteinHEXIM1	MULTI-MSMS	FU20160819-10	560.964	3	560.629	1678.86	81950.7	2.2969	0.0012877	0.61148	0.00034282	2.9084	0.0016305	560.963	47.034	0.12928	47.034	46.989	47.119	0					42	14	4	0	0	0	4.2073e-17	1	23567	167.89
	AENLQLLTENELHR	14	Unmodified	_AENLQLLTENELHR_					0	0	0	0	HEXI1_HUMANProteinHEXIM1	HEXI1_HUMANProteinHEXIM1	HEXI1_HUMANProteinHEXIM1	MULTI-MSMS	FU20160819-10	560.964	3	560.629	1678.86	79435.4	3.56	0.0019959	-0.70172	-0.0003934	2.8583	0.0016024	560.962	49.565	0.059143	49.565	49.554	49.614	0					9	7	2	0	0	0	0.027005	1	24940	81.632
	AENLQLLTENELHR	14	Unmodified	_AENLQLLTENELHR_					0	0	0	0	HEXI1_HUMANProteinHEXIM1	HEXI1_HUMANProteinHEXIM1	HEXI1_HUMANProteinHEXIM1	MULTI-MSMS	FU20160819-10	560.63	3	560.629	1678.86	81368.9	2.6822	0.0015037	-0.41102	-0.00023043	2.2712	0.0012733	560.628	65.132	0.30723	65.132	64.958	65.265	0					79	36	3	0	0	0	0.0032392	1	34455	103.76
	AENLQLLTENELHR	14	Unmodified	_AENLQLLTENELHR_					0	0	0	0	HEXI1_HUMANProteinHEXIM1	HEXI1_HUMANProteinHEXIM1	HEXI1_HUMANProteinHEXIM1	MULTI-MSMS	FU20160819-10	560.63	3	560.629	1678.86	79839.8	0.88638	0.00049693	1.957	0.0010972	2.8434	0.0015941	560.63	96.453	0.1678	96.453	96.412	96.58	0					35	15	3	0	0	0	6.3392e-50	1	61358	190.37
	AENLQLLTENELHR	14	Unmodified	_AENLQLLTENELHR_					0	0	0	0	HEXI1_HUMANProteinHEXIM1	HEXI1_HUMANProteinHEXIM1	HEXI1_HUMANProteinHEXIM1	MSMS	FU20160819-10	560.63	3	560.629	1678.86	NaN	NaN	NaN	NaN	NaN	NaN	NaN	NaN	13.066	1	13.066	12.566	13.566	0								0	0	0	0.0091099	1	3609	101.62
	AENLQLLTENELHR	14	Unmodified	_AENLQLLTENELHR_					0	0	0	0	HEXI1_HUMANProteinHEXIM1	HEXI1_HUMANProteinHEXIM1	HEXI1_HUMANProteinHEXIM1	MSMS	FU20160819-10	560.631	3	560.629	1678.86	NaN	NaN	NaN	NaN	NaN	NaN	NaN	NaN	39.758	1	39.758	39.258	40.258	0								0	0	0	0.016061	1	19309	91.712
	AENLQLLTENELHR	14	Unmodified	_AENLQLLTENELHR_					0	0	0	0	HEXI1_HUMANProteinHEXIM1	HEXI1_HUMANProteinHEXIM1	HEXI1_HUMANProteinHEXIM1	MULTI-MSMS	FU20160819-11	560.964	3	560.629	1678.86	84580.3	2.3352	0.0013092	-0.035567	-1.994e-05	2.2997	0.0012893	560.963	64.927	0.16525	64.927	64.851	65.017	0					29	19	2	0	0	0	7.9629e-05	1	33448	149.57
	AENLQLLTENELHRQQER	18	Unmodified	_AENLQLLTENELHRQQER_					0	0	0	1	HEXI1_HUMANProteinHEXIM1	HEXI1_HUMANProteinHEXIM1	HEXI1_HUMANProteinHEXIM1	MULTI-MSMS	FU20160819-04	741.051	3	741.049	2220.12	71012.2	1.6883	0.0012511	1.5414	0.0011423	3.2297	0.0023934	741.384	57.228	0.44895	57.228	57.052	57.501	0					185	55	7	0	0	0	0.00095356	2	25758	96.489
	AENLQLLTENELHRQQER	18	Unmodified	_AENLQLLTENELHRQQER_					0	0	0	1	HEXI1_HUMANProteinHEXIM1	HEXI1_HUMANProteinHEXIM1	HEXI1_HUMANProteinHEXIM1	MULTI-MSMS	FU20160819-04	556.291	4	556.038	2220.12	78538.9	2.5561	0.0014213	-0.65228	-0.00036269	1.9038	0.0010586	556.289	57.299	0.35981	57.299	57.288	57.648	-3.8147e-06					227	44	6	0	0	0	0.0039656	1	25978	74.89
	AENLQLLTENELHRQQER	18	Unmodified	_AENLQLLTENELHRQQER_					0	0	0	1	HEXI1_HUMANProteinHEXIM1	HEXI1_HUMANProteinHEXIM1	HEXI1_HUMANProteinHEXIM1	MULTI-MSMS	FU20160819-04	741.386	3	741.049	2220.12	70232.5	1.7056	0.0012639	1.3015	0.00096445	3.007	0.0022284	741.384	57.299	0.35976	57.299	57.281	57.641	0					162	44	4	0	0	0	0.0037426	1	26012	75.463
	AENLQLLTENELHRQQER	18	Unmodified	_AENLQLLTENELHRQQER_					0	0	0	1	HEXI1_HUMANProteinHEXIM1	HEXI1_HUMANProteinHEXIM1	HEXI1_HUMANProteinHEXIM1	MULTI-MSMS	FU20160819-04	741.051	3	741.049	2220.12	71660.5	1.7865	0.0013239	0.6635	0.00049169	2.45	0.0018156	741.049	57.773	0.097073	57.773	57.724	57.821	0					23	11	3	0	0	0	0.00078502	2	26292	101.53
	AENLQLLTENELHRQQER	18	Unmodified	_AENLQLLTENELHRQQER_					0	0	0	1	HEXI1_HUMANProteinHEXIM1	HEXI1_HUMANProteinHEXIM1	HEXI1_HUMANProteinHEXIM1	MULTI-MSMS	FU20160819-04	741.63	3	741.049	2220.12	71512.9	2.1145	0.0015669	1.1247	0.00083345	3.2392	0.0024004	741.05	58.229	0.24636	58.229	58.146	58.393	0					41	30	3	0	0	0	0.019252	2	26617	59.862
	AENLQLLTENELHRQQER	18	Unmodified	_AENLQLLTENELHRQQER_					0	0	0	1	HEXI1_HUMANProteinHEXIM1	HEXI1_HUMANProteinHEXIM1	HEXI1_HUMANProteinHEXIM1	MULTI-MSMS	FU20160819-04	741.388	3	741.049	2220.12	59986.5	2.1625	0.0016025	-0.64799	-0.0004802	1.5145	0.0011223	741.05	58.966	0.090923	58.966	58.88	58.971	0					19	9	4	0	0	0	0.034308	1	27187	50.608
	AENLQLLTENELHRQQER	18	Unmodified	_AENLQLLTENELHRQQER_					0	0	0	1	HEXI1_HUMANProteinHEXIM1	HEXI1_HUMANProteinHEXIM1	HEXI1_HUMANProteinHEXIM1	MULTI-MSMS	FU20160819-04	556.04	4	556.038	2220.12	75122.2	3.0336	0.0016868	-1.5191	-0.00084468	1.5145	0.0008421	556.288	58.966	0.17604	58.966	58.865	59.041	0					29	20	2	0	0	0	0.02112	1	27243	57.288
	AENLQLLTENELHRQQER	18	Unmodified	_AENLQLLTENELHRQQER_					0	0	0	1	HEXI1_HUMANProteinHEXIM1	HEXI1_HUMANProteinHEXIM1	HEXI1_HUMANProteinHEXIM1	MULTI-MSMS	FU20160819-05	741.385	3	741.049	2220.12	78936.7	1.2582	0.00093238	1.2382	0.00091757	2.4964	0.00185	741.05	55.252	0.090927	55.252	55.185	55.276	0					13	11	2	0	0	0	0.007615	1	23912	71.531
	AENLQLLTENELHRQQER	18	Unmodified	_AENLQLLTENELHRQQER_					0	0	0	1	HEXI1_HUMANProteinHEXIM1	HEXI1_HUMANProteinHEXIM1	HEXI1_HUMANProteinHEXIM1	MULTI-MSMS	FU20160819-05	556.29	4	556.038	2220.12	78084	2.07	0.001151	-0.38208	-0.00021245	1.6879	0.00093855	556.289	57.271	1.0992	57.271	57.118	58.218	0					553	143	7	0	0	0	0.012396	2	25223	66.673
	AENLQLLTENELHRQQER	18	Unmodified	_AENLQLLTENELHRQQER_					0	0	0	1	HEXI1_HUMANProteinHEXIM1	HEXI1_HUMANProteinHEXIM1	HEXI1_HUMANProteinHEXIM1	MULTI-MSMS	FU20160819-05	741.051	3	741.049	2220.12	70733.7	1.2061	0.00089381	1.6776	0.0012432	2.8837	0.002137	741.384	57.329	0.58427	57.329	57.133	57.718	-3.8147e-06					416	75	7	0	0	0	6.9853e-05	2	25491	114.31
	AENLQLLTENELHRQQER	18	Unmodified	_AENLQLLTENELHRQQER_					0	0	0	1	HEXI1_HUMANProteinHEXIM1	HEXI1_HUMANProteinHEXIM1	HEXI1_HUMANProteinHEXIM1	MULTI-MSMS	FU20160819-05	741.385	3	741.049	2220.12	71221.7	1.3046	0.00096679	1.4933	0.0011066	2.7979	0.0020734	741.384	57.737	0.27147	57.737	57.703	57.975	0					57	36	2	0	0	0	0.0036649	1	25746	77.42
	AENLQLLTENELHRQQER	18	Unmodified	_AENLQLLTENELHRQQER_					0	0	0	1	HEXI1_HUMANProteinHEXIM1	HEXI1_HUMANProteinHEXIM1	HEXI1_HUMANProteinHEXIM1	MULTI-MSMS	FU20160819-05	556.04	4	556.038	2220.12	79997.4	2.3233	0.0012918	-0.35942	-0.00019985	1.9638	0.001092	556.038	58.325	0.25156	58.325	58.218	58.469	0					100	32	4	0	0	0	0.0050555	2	26094	73.834
	AENLQLLTENELHRQQER	18	Unmodified	_AENLQLLTENELHRQQER_					0	0	0	1	HEXI1_HUMANProteinHEXIM1	HEXI1_HUMANProteinHEXIM1	HEXI1_HUMANProteinHEXIM1	MULTI-MSMS	FU20160819-05	741.386	3	741.049	2220.12	70739.6	1.4899	0.0011041	1.7317	0.0012833	3.2216	0.0023874	741.384	58.57	0.1247	58.57	58.469	58.594	0					17	13	2	0	0	0	0.0014028	1	26293	88.507
	AENLQLLTENELHRQQER	18	Unmodified	_AENLQLLTENELHRQQER_					0	0	0	1	HEXI1_HUMANProteinHEXIM1	HEXI1_HUMANProteinHEXIM1	HEXI1_HUMANProteinHEXIM1	MULTI-MSMS	FU20160819-05	556.29	4	556.038	2220.12	80912.8	2.4406	0.0013571	-1.2462	-0.00069292	1.1944	0.00066414	556.288	59.205	0.16829	59.205	59.145	59.314	0					39	21	4	0	0	0	0.031648	1	26788	51.265
	AENLQLLTENELHRQQER	18	Unmodified	_AENLQLLTENELHRQQER_					0	0	0	1	HEXI1_HUMANProteinHEXIM1	HEXI1_HUMANProteinHEXIM1	HEXI1_HUMANProteinHEXIM1	MULTI-SECPEP	FU20160819-05	555.741	4	556.038	2220.12	82195.4	2.0675	0.0011496	0.35017	0.00019471	2.4176	0.0013443	556.038	55.251	0.038193	55.251	55.216	55.255	0					5	4	2	0	0	0	0.029139	1	23903	65.956
	AENLQLLTENELHRQQER	18	Unmodified	_AENLQLLTENELHRQQER_					0	0	0	1	HEXI1_HUMANProteinHEXIM1	HEXI1_HUMANProteinHEXIM1	HEXI1_HUMANProteinHEXIM1	MULTI-MSMS	FU20160819-07	556.29	4	556.038	2220.12	78255.6	2.1934	0.0012196	0.042022	2.3366e-05	2.2354	0.001243	556.289	57.675	0.81616	57.675	57.47	58.287	-3.8147e-06					389	102	7	0	0	0	0.0034271	1	23646	81.128
	AENLQLLTENELHRQQER	18	Unmodified	_AENLQLLTENELHRQQER_					0	0	0	1	HEXI1_HUMANProteinHEXIM1	HEXI1_HUMANProteinHEXIM1	HEXI1_HUMANProteinHEXIM1	MULTI-MSMS	FU20160819-08	741.051	3	741.049	2220.12	70569.4	1.5455	0.0011453	1.4737	0.0010921	3.0192	0.0022374	741.384	57.637	0.39632	57.637	57.518	57.914	0					127	46	6	0	0	0	0.0036688	2	24789	77.324
	AENLQLLTENELHRQQER	18	Unmodified	_AENLQLLTENELHRQQER_					0	0	0	1	HEXI1_HUMANProteinHEXIM1	HEXI1_HUMANProteinHEXIM1	HEXI1_HUMANProteinHEXIM1	MULTI-MSMS	FU20160819-08	556.29	4	556.038	2220.12	78381.9	2.7174	0.001511	-0.39885	-0.00022178	2.3186	0.0012892	556.289	57.621	0.20939	57.621	57.479	57.689	0					99	23	6	0	0	0	0.0076251	1	24817	71.344
	AEPFLSEYQHQPQTSNCTGAAAVQEELNPERPPGAEER	38	Unmodified	_AEPFLSEYQHQPQTSNCTGAAAVQEELNPERPPGAEER_					0	0	0	1	HEXI1_HUMANProteinHEXIM1	HEXI1_HUMANProteinHEXIM1	HEXI1_HUMANProteinHEXIM1	MULTI-MSMS	FU20160819-04	1061	4	1060.24	4236.94	61053.9	2.8473	0.0030188	-0.32019	-0.00033948	2.5271	0.0026793	1060.99	69.725	0.36183	69.725	69.507	69.869	0					93	44	3	0	0	0	5.6838e-05	1	34104	50.464
	AEPFLSEYQHQPQTSNCTGAAAVQEELNPERPPGAEER	38	Unmodified	_AEPFLSEYQHQPQTSNCTGAAAVQEELNPERPPGAEER_					0	0	0	1	HEXI1_HUMANProteinHEXIM1	HEXI1_HUMANProteinHEXIM1	HEXI1_HUMANProteinHEXIM1	MULTI-MSMS	FU20160819-05	1060.5	4	1060.24	4236.94	61667.3	2.1773	0.0023084	-0.072944	-7.7339e-05	2.1043	0.0022311	1060.74	69.924	0.30096	69.924	69.711	70.012	0					99	38	5	0	0	0	4.1329e-16	1	33657	69.088
	AEPFLSEYQHQPQTSNCTGAAAVQEELNPERPPGAEER	38	Unmodified	_AEPFLSEYQHQPQTSNCTGAAAVQEELNPERPPGAEER_					0	0	0	1	HEXI1_HUMANProteinHEXIM1	HEXI1_HUMANProteinHEXIM1	HEXI1_HUMANProteinHEXIM1	MULTI-SECPEP	FU20160819-07	1060.24	4	1060.24	4236.94	60310.4	2.3667	0.0025093	0.78298	0.00083015	3.1497	0.0033395	1060.74	69.891	0.073692	69.891	69.847	69.92	0					8	8	2	0	0	0	0.0022354	1	32781	41.491
	AEPFLSEYQHQPQTSNCTGAAAVQEELNPERPPGAEER	38	Unmodified	_AEPFLSEYQHQPQTSNCTGAAAVQEELNPERPPGAEER_					0	0	0	1	HEXI1_HUMANProteinHEXIM1	HEXI1_HUMANProteinHEXIM1	HEXI1_HUMANProteinHEXIM1	MULTI-MSMS	FU20160819-08	1060.74	4	1060.24	4236.94	60096.1	2.8837	0.0030574	-1.0296	-0.0010916	1.8541	0.0019658	1060.74	70.285	0.31996	70.285	69.998	70.318	0					97	32	4	0	0	0	1.694e-09	2	34183	57.484
	AFPQLGGR	8	Unmodified	_AFPQLGGR_					0	0	0	0	HEXI1_HUMANProteinHEXIM1	HEXI1_HUMANProteinHEXIM1	HEXI1_HUMANProteinHEXIM1	MULTI-SECPEP	FU20160819-08	845.465	1	845.463	844.456	66196.1	2.705	0.0022869	-0.11484	-9.7096e-05	2.5901	0.0021898	845.463	44.767	0.10606	44.767	44.727	44.833	0					25	13	2	0	0	0	0.0042082	1	16667	85.359
	AFPQLGGRPGPEGEGSLESQPPPLQTQACPESSCLR	36	Unmodified	_AFPQLGGRPGPEGEGSLESQPPPLQTQACPESSCLR_					0	0	0	1	HEXI1_HUMANProteinHEXIM1	HEXI1_HUMANProteinHEXIM1	HEXI1_HUMANProteinHEXIM1	MULTI-MSMS	FU20160819-04	959.965	4	959.46	3833.81	61092.6	2.2931	0.0022002	0.037668	3.6141e-05	2.3308	0.0022363	959.961	71.224	2.8077	71.224	69.726	72.534	0					2449	352	9	0	0	0	8.5261e-10	9	36166	62.254
	AFPQLGGRPGPEGEGSLESQPPPLQTQACPESSCLR	36	Unmodified	_AFPQLGGRPGPEGEGSLESQPPPLQTQACPESSCLR_					0	0	0	1	HEXI1_HUMANProteinHEXIM1	HEXI1_HUMANProteinHEXIM1	HEXI1_HUMANProteinHEXIM1	MULTI-MSMS	FU20160819-04	1279.62	3	1278.94	3833.81	53700	2.1699	0.0027752	-0.085501	-0.00010935	2.0844	0.0026658	1279.61	71.115	2.7993	71.115	69.743	72.542	0					2288	351	9	0	0	0	4.1774e-12	6	35907	63.328
	AFPQLGGRPGPEGEGSLESQPPPLQTQACPESSCLR	36	Unmodified	_AFPQLGGRPGPEGEGSLESQPPPLQTQACPESSCLR_					0	0	0	1	HEXI1_HUMANProteinHEXIM1	HEXI1_HUMANProteinHEXIM1	HEXI1_HUMANProteinHEXIM1	MULTI-MSMS	FU20160819-04	959.964	4	959.46	3833.81	61342.7	2.003	0.0019218	0.7528	0.00072228	2.7558	0.002644	960.213	72.595	2.1086	72.595	72.512	74.621	-7.6294e-06					452	255	6	0	0	0	0.0021065	1	36631	44.023
	AFPQLGGRPGPEGEGSLESQPPPLQTQACPESSCLR	36	Unmodified	_AFPQLGGRPGPEGEGSLESQPPPLQTQACPESSCLR_					0	0	0	1	HEXI1_HUMANProteinHEXIM1	HEXI1_HUMANProteinHEXIM1	HEXI1_HUMANProteinHEXIM1	MULTI-MSMS	FU20160819-04	1279.61	3	1278.94	3833.81	53674.8	1.6914	0.0021632	0.19955	0.00025522	1.891	0.0024184	1279.61	72.599	0.35127	72.599	72.498	72.849	0					186	44	6	0	0	0	1.8517e-27	1	36684	95.679
	AFPQLGGRPGPEGEGSLESQPPPLQTQACPESSCLR	36	Unmodified	_AFPQLGGRPGPEGEGSLESQPPPLQTQACPESSCLR_					0	0	0	1	HEXI1_HUMANProteinHEXIM1	HEXI1_HUMANProteinHEXIM1	HEXI1_HUMANProteinHEXIM1	MULTI-MSMS	FU20160819-04	1279.61	3	1278.94	3833.81	53795.6	2.2734	0.0029076	-1.5244	-0.0019497	0.74899	0.00095792	1279.61	73.165	1.0819	73.165	72.849	73.931	0					415	132	6	0	0	0	2.9945e-26	1	36945	79.616
	AFPQLGGRPGPEGEGSLESQPPPLQTQACPESSCLR	36	Unmodified	_AFPQLGGRPGPEGEGSLESQPPPLQTQACPESSCLR_					0	0	0	1	HEXI1_HUMANProteinHEXIM1	HEXI1_HUMANProteinHEXIM1	HEXI1_HUMANProteinHEXIM1	MULTI-MSMS	FU20160819-04	1279.61	3	1278.94	3833.81	54118.1	2.7127	0.0034693	-2.7147	-0.0034719	-0.0020116	-2.5727e-06	1279.61	73.575	0.69722	73.575	73.403	74.1	7.6294e-06					133	80	2	0	0	0	6.3038e-26	1	37532	76.261
	AFPQLGGRPGPEGEGSLESQPPPLQTQACPESSCLR	36	Unmodified	_AFPQLGGRPGPEGEGSLESQPPPLQTQACPESSCLR_					0	0	0	1	HEXI1_HUMANProteinHEXIM1	HEXI1_HUMANProteinHEXIM1	HEXI1_HUMANProteinHEXIM1	MULTI-MSMS	FU20160819-05	1279.62	3	1278.94	3833.81	53920.8	1.8821	0.0024071	-0.1181	-0.00015104	1.764	0.0022561	1279.61	70.943	2.9651	70.943	69.979	72.944	0					2862	369	10	0	0	0	5.9107e-07	5	35261	57.095
	AFPQLGGRPGPEGEGSLESQPPPLQTQACPESSCLR	36	Unmodified	_AFPQLGGRPGPEGEGSLESQPPPLQTQACPESSCLR_					0	0	0	1	HEXI1_HUMANProteinHEXIM1	HEXI1_HUMANProteinHEXIM1	HEXI1_HUMANProteinHEXIM1	MULTI-MSMS	FU20160819-05	959.714	4	959.46	3833.81	61439.3	1.5993	0.0015344	0.40307	0.00038673	2.0023	0.0019211	959.962	71.132	2.9442	71.132	69.949	72.893	0					2752	366	9	0	0	0	3.1837e-30	8	35774	100.33
	AFPQLGGRPGPEGEGSLESQPPPLQTQACPESSCLR	36	Unmodified	_AFPQLGGRPGPEGEGSLESQPPPLQTQACPESSCLR_					0	0	0	1	HEXI1_HUMANProteinHEXIM1	HEXI1_HUMANProteinHEXIM1	HEXI1_HUMANProteinHEXIM1	MULTI-MSMS	FU20160819-05	960.211	4	959.46	3833.81	61655.9	1.8241	0.0017501	-0.96664	-0.00092745	0.85745	0.00082269	959.961	73.576	1.3762	73.576	73.118	74.494	0					681	160	7	0	0	0	0.0018655	2	36799	44.313
	AFPQLGGRPGPEGEGSLESQPPPLQTQACPESSCLR	36	Unmodified	_AFPQLGGRPGPEGEGSLESQPPPLQTQACPESSCLR_					0	0	0	1	HEXI1_HUMANProteinHEXIM1	HEXI1_HUMANProteinHEXIM1	HEXI1_HUMANProteinHEXIM1	MULTI-MSMS	FU20160819-05	1279.61	3	1278.94	3833.81	53941.7	2.1009	0.0026869	-2.5348	-0.0032419	-0.43394	-0.00055498	1279.94	73.531	1.5023	73.531	72.944	74.447	0					686	177	7	0	0	0	3.3362e-26	3	36873	84.53
	AFPQLGGRPGPEGEGSLESQPPPLQTQACPESSCLR	36	Unmodified	_AFPQLGGRPGPEGEGSLESQPPPLQTQACPESSCLR_					0	0	0	1	HEXI1_HUMANProteinHEXIM1	HEXI1_HUMANProteinHEXIM1	HEXI1_HUMANProteinHEXIM1	MULTI-MSMS	FU20160819-05	959.964	4	959.46	3833.81	61133.9	1.885	0.0018086	1.858	0.0017827	3.743	0.0035913	959.713	75.046	0.40442	75.046	74.726	75.131	0					114	43	4	0	0	0	0.0005295	1	37989	47.734
	AFPQLGGRPGPEGEGSLESQPPPLQTQACPESSCLR	36	Unmodified	_AFPQLGGRPGPEGEGSLESQPPPLQTQACPESSCLR_					0	0	0	1	HEXI1_HUMANProteinHEXIM1	HEXI1_HUMANProteinHEXIM1	HEXI1_HUMANProteinHEXIM1	MULTI-MSMS	FU20160819-07	1279.28	3	1278.94	3833.81	58149.3	2.6342	0.003369	-1.1543	-0.0014763	1.4799	0.0018927	1279.28	61.681	0.063576	61.681	61.636	61.7	0					10	7	2	0	0	0	0.0057443	1	26709	39.816
	AFPQLGGRPGPEGEGSLESQPPPLQTQACPESSCLR	36	Unmodified	_AFPQLGGRPGPEGEGSLESQPPPLQTQACPESSCLR_					0	0	0	1	HEXI1_HUMANProteinHEXIM1	HEXI1_HUMANProteinHEXIM1	HEXI1_HUMANProteinHEXIM1	MULTI-MSMS	FU20160819-07	1279.28	3	1278.94	3833.81	54946.8	2.6768	0.0034234	-0.92627	-0.0011846	1.7505	0.0022388	1279.95	70.281	0.52525	70.281	70.125	70.65	0					262	61	6	0	0	0	3.5789e-09	2	33046	58.915
	AFPQLGGRPGPEGEGSLESQPPPLQTQACPESSCLR	36	Unmodified	_AFPQLGGRPGPEGEGSLESQPPPLQTQACPESSCLR_					0	0	0	1	HEXI1_HUMANProteinHEXIM1	HEXI1_HUMANProteinHEXIM1	HEXI1_HUMANProteinHEXIM1	MULTI-MSMS	FU20160819-07	960.212	4	959.46	3833.81	62579.8	2.3422	0.0022473	-0.38362	-0.00036807	1.9586	0.0018792	959.961	70.282	0.53455	70.282	70.108	70.642	0					215	61	6	0	0	0	4.2012e-06	1	33048	55.117
	AFPQLGGRPGPEGEGSLESQPPPLQTQACPESSCLR	36	Unmodified	_AFPQLGGRPGPEGEGSLESQPPPLQTQACPESSCLR_					0	0	0	1	HEXI1_HUMANProteinHEXIM1	HEXI1_HUMANProteinHEXIM1	HEXI1_HUMANProteinHEXIM1	MULTI-MSMS	FU20160819-08	959.961	4	959.46	3833.81	62734.9	3.113	0.0029868	-1.339	-0.0012847	1.774	0.0017021	959.96	70.524	0.65292	70.524	70.264	70.917	7.6294e-06					196	70	6	0	0	0	2.8954e-09	2	34313	59.67
	AFPQLGGRPGPEGEGSLESQPPPLQTQACPESSCLR	36	Unmodified	_AFPQLGGRPGPEGEGSLESQPPPLQTQACPESSCLR_					0	0	0	1	HEXI1_HUMANProteinHEXIM1	HEXI1_HUMANProteinHEXIM1	HEXI1_HUMANProteinHEXIM1	MULTI-MSMS	FU20160819-08	1279.28	3	1278.94	3833.81	54246.7	2.6777	0.0034246	-0.59054	-0.00075527	2.0872	0.0026694	1279.28	70.406	0.18718	70.406	70.285	70.472	0					53	14	4	0	0	0	2.2923e-26	2	34315	82.058
	AFPQLGGRPGPEGEGSLESQPPPLQTQACPESSCLR	36	Unmodified	_AFPQLGGRPGPEGEGSLESQPPPLQTQACPESSCLR_					0	0	0	1	HEXI1_HUMANProteinHEXIM1	HEXI1_HUMANProteinHEXIM1	HEXI1_HUMANProteinHEXIM1	MULTI-MSMS	FU20160819-08	1279.61	3	1278.94	3833.81	54246.7	2.7115	0.0034678	-0.58388	-0.00074675	2.1276	0.0027211	1279.95	70.524	0.44563	70.524	70.472	70.917	0					180	54	4	0	0	0	0.0072348	1	34611	39.144
90	AFPQLGGRPGPEGEGSLESQPPPLQTQACPESSCLREGEK	40	Unmodified	_AFPQLGGRPGPEGEGSLESQPPPLQTQACPESSCLREGEK_					0	0	0	2	HEXI1_HUMANProteinHEXIM1	HEXI1_HUMANProteinHEXIM1	HEXI1_HUMANProteinHEXIM1	MULTI-MSMS	FU20160819-04	1070.77	4	1070.26	4277.01	58207.2	2.6605	0.0028474	-0.080649	-8.6315e-05	2.5798	0.0027611	1070.76	65.741	0.12032	65.741	65.66	65.78	0					75	10	9	0	0	0	0.00012949	1	31582	42.385
	AFPQLGGRPGPEGEGSLESQPPPLQTQACPESSCLREGEK	40	Unmodified	_AFPQLGGRPGPEGEGSLESQPPPLQTQACPESSCLREGEK_					0	0	0	2	HEXI1_HUMANProteinHEXIM1	HEXI1_HUMANProteinHEXIM1	HEXI1_HUMANProteinHEXIM1	MULTI-MSMS	FU20160819-04	714.513	6	713.843	4277.01	68771.8	3.0741	0.0021944	-0.39288	-0.00028046	2.6812	0.001914	714.177	65.979	0.17824	65.979	65.858	66.036	0					37	21	3	0	0	0	0.027759	1	31712	23.88
	AFPQLGGRPGPEGEGSLESQPPPLQTQACPESSCLREGEK	40	Unmodified	_AFPQLGGRPGPEGEGSLESQPPPLQTQACPESSCLREGEK_					0	0	0	2	HEXI1_HUMANProteinHEXIM1	HEXI1_HUMANProteinHEXIM1	HEXI1_HUMANProteinHEXIM1	MULTI-MSMS	FU20160819-04	856.813	5	856.41	4277.01	63624.6	2.62	0.0022438	-0.17892	-0.00015323	2.4411	0.0020906	856.811	65.998	0.56223	65.998	65.858	66.42	0					235	68	7	0	0	0	0.030732	1	31735	26.55
	AFPQLGGRPGPEGEGSLESQPPPLQTQACPESSCLREGEK	40	Unmodified	_AFPQLGGRPGPEGEGSLESQPPPLQTQACPESSCLREGEK_					0	0	0	2	HEXI1_HUMANProteinHEXIM1	HEXI1_HUMANProteinHEXIM1	HEXI1_HUMANProteinHEXIM1	MULTI-MSMS	FU20160819-04	1070.76	4	1070.26	4277.01	58207.1	2.661	0.0028479	-0.63296	-0.00067743	2.028	0.0021705	1070.76	66.03	0.7985	66.03	65.858	66.656	0					711	96	9	0	0	0	7.6362e-14	2	32067	62.794
	AFPQLGGRPGPEGEGSLESQPPPLQTQACPESSCLREGEK	40	Unmodified	_AFPQLGGRPGPEGEGSLESQPPPLQTQACPESSCLREGEK_					0	0	0	2	HEXI1_HUMANProteinHEXIM1	HEXI1_HUMANProteinHEXIM1	HEXI1_HUMANProteinHEXIM1	MULTI-MSMS	FU20160819-04	714.014	6	713.843	4277.01	67418.7	3.0831	0.0022009	-0.29748	-0.00021235	2.7857	0.0019885	714.177	66.244	0.14459	66.244	66.191	66.336	0					21	15	4	0	0	0	0.00010155	1	31920	40.12
	AFPQLGGRPGPEGEGSLESQPPPLQTQACPESSCLREGEK	40	Unmodified	_AFPQLGGRPGPEGEGSLESQPPPLQTQACPESSCLREGEK_					0	0	0	2	HEXI1_HUMANProteinHEXIM1	HEXI1_HUMANProteinHEXIM1	HEXI1_HUMANProteinHEXIM1	MULTI-MSMS	FU20160819-05	856.613	5	856.41	4277.01	63440	1.7615	0.0015085	0.58065	0.00049727	2.3421	0.0020058	856.811	65.977	0.78672	65.977	65.728	66.515	0					454	93	7	0	0	0	1.5751e-05	2	31285	45.265
	AFPQLGGRPGPEGEGSLESQPPPLQTQACPESSCLREGEK	40	Unmodified	_AFPQLGGRPGPEGEGSLESQPPPLQTQACPESSCLREGEK_					0	0	0	2	HEXI1_HUMANProteinHEXIM1	HEXI1_HUMANProteinHEXIM1	HEXI1_HUMANProteinHEXIM1	MULTI-MSMS	FU20160819-05	714.012	6	713.843	4277.01	70550.1	2.1488	0.0015339	0.72444	0.00051714	2.8732	0.002051	714.01	65.93	0.54122	65.93	65.796	66.337	0					114	63	5	0	0	0	0.0074556	3	31060	32.189
	AFPQLGGRPGPEGEGSLESQPPPLQTQACPESSCLREGEK	40	Unmodified	_AFPQLGGRPGPEGEGSLESQPPPLQTQACPESSCLREGEK_					0	0	0	2	HEXI1_HUMANProteinHEXIM1	HEXI1_HUMANProteinHEXIM1	HEXI1_HUMANProteinHEXIM1	MULTI-MSMS	FU20160819-05	1070.76	4	1070.26	4277.01	58521.7	1.8183	0.001946	-0.0086432	-9.2505e-06	1.8096	0.0019368	1070.76	65.95	1.0821	65.95	65.552	66.634	0					1030	127	11	0	0	0	7.554e-13	2	31216	58.001
	AFPQLGGRPGPEGEGSLESQPPPLQTQACPESSCLREGEK	40	Unmodified	_AFPQLGGRPGPEGEGSLESQPPPLQTQACPESSCLREGEK_					0	0	0	2	HEXI1_HUMANProteinHEXIM1	HEXI1_HUMANProteinHEXIM1	HEXI1_HUMANProteinHEXIM1	MULTI-MSMS	FU20160819-05	1427.35	3	1426.68	4277.01	51273.4	1.4322	0.0020432	0.55144	0.00078672	1.9836	0.0028299	1427.35	65.996	0.68457	65.996	65.744	66.428	0					417	80	7	0	0	0	2.4729e-05	1	31329	47.156
	AFPQLGGRPGPEGEGSLESQPPPLQTQACPESSCLREGEK	40	Unmodified	_AFPQLGGRPGPEGEGSLESQPPPLQTQACPESSCLREGEK_					0	0	0	2	HEXI1_HUMANProteinHEXIM1	HEXI1_HUMANProteinHEXIM1	HEXI1_HUMANProteinHEXIM1	MULTI-MSMS	FU20160819-05	1070.76	4	1070.26	4277.01	58918.3	1.8106	0.0019378	-0.4991	-0.00053417	1.3115	0.0014036	1070.76	66.646	0.18277	66.646	66.595	66.778	0					39	23	3	0	0	0	7.957e-13	2	31771	57.716
	AFPQLGGRPGPEGEGSLESQPPPLQTQACPESSCLREGEK	40	Unmodified	_AFPQLGGRPGPEGEGSLESQPPPLQTQACPESSCLREGEK_					0	0	0	2	HEXI1_HUMANProteinHEXIM1	HEXI1_HUMANProteinHEXIM1	HEXI1_HUMANProteinHEXIM1	MULTI-MSMS	FU20160819-07	1070.76	4	1070.26	4277.01	59319.8	2.8849	0.0030876	-0.74852	-0.00080111	2.1364	0.0022865	1070.76	67.327	0.71854	67.327	67.041	67.759	0					351	79	7	0	0	0	0.0013804	1	30570	38.765
	AFPQLGGRPGPEGEGSLESQPPPLQTQACPESSCLREGEK	40	Unmodified	_AFPQLGGRPGPEGEGSLESQPPPLQTQACPESSCLREGEK_					0	0	0	2	HEXI1_HUMANProteinHEXIM1	HEXI1_HUMANProteinHEXIM1	HEXI1_HUMANProteinHEXIM1	MULTI-MSMS	FU20160819-08	1071.01	4	1070.26	4277.01	59249.8	2.8313	0.0030303	-0.66881	-0.0007158	2.1625	0.0023145	1070.76	67.399	0.75566	67.399	67.088	67.844	0					393	80	7	0	0	0	0.0042485	2	31876	36.6
356	APLSKFGD	8	Unmodified	_APLSKFGD_					0	0	0	1	HEXI1_HUMANProteinHEXIM1	HEXI1_HUMANProteinHEXIM1	HEXI1_HUMANProteinHEXIM1	MULTI-MSMS	FU20160819-07	834.44	1	834.436	833.428	67966.8	2.3756	0.0019823	2.2525	0.0018796	4.6281	0.0038619	834.437	27.392	0.53298	27.392	27.102	27.635	0					113	66	2	0	0	0	0.01166	1	11161	87.696
	APLSKFGD	8	Unmodified	_APLSKFGD_					0	0	0	1	HEXI1_HUMANProteinHEXIM1	HEXI1_HUMANProteinHEXIM1	HEXI1_HUMANProteinHEXIM1	MULTI-MSMS	FU20160819-08	834.438	1	834.436	833.428	67847.4	2.4253	0.0020237	1.8862	0.0015739	4.3114	0.0035976	834.437	27.794	0.14569	27.794	27.746	27.891	0					39	18	3	0	0	0	0.010576	1	11963	90.709
	CLSRMEDENNR	11	Unmodified	_CLSRMEDENNR_					0	0	0	1	HEXI1_HUMANProteinHEXIM1	HEXI1_HUMANProteinHEXIM1	HEXI1_HUMANProteinHEXIM1	MULTI-MSMS	FU20160819-07	475.208	3	475.207	1422.6	81149.2	3.1845	0.0015133	-1.2462	-0.00059218	1.9383	0.0009211	475.206	15.858	0.59363	15.858	15.712	16.306	0					229	76	7	0	0	0	0.0057368	1	6306	100.09
	CLSRMEDENNR	11	Unmodified	_CLSRMEDENNR_					0	0	0	1	HEXI1_HUMANProteinHEXIM1	HEXI1_HUMANProteinHEXIM1	HEXI1_HUMANProteinHEXIM1	MULTI-MSMS	FU20160819-07	475.208	3	475.207	1422.6	87388.2	3.1041	0.0014751	-0.49772	-0.00023652	2.6064	0.0012386	475.206	16.146	0.31177	16.146	16.065	16.376	0					94	40	3	0	0	0	0.029259	1	6485	69.261
	CLSRMEDENNR	11	Unmodified	_CLSRMEDENNR_					0	0	0	1	HEXI1_HUMANProteinHEXIM1	HEXI1_HUMANProteinHEXIM1	HEXI1_HUMANProteinHEXIM1	MULTI-MSMS	FU20160819-08	475.208	3	475.207	1422.6	81218.1	2.0597	0.0009788	-0.36115	-0.00017162	1.6986	0.00080717	475.207	16.76	1.2089	16.76	16.642	17.851	0					441	156	6	0	0	0	0.0013011	3	7064	113.67
284	DFSETYERYHTESLQNMSK	19	Unmodified	_DFSETYERYHTESLQNMSK_					0	0	0	1	HEXI1_HUMANProteinHEXIM1	HEXI1_HUMANProteinHEXIM1	HEXI1_HUMANProteinHEXIM1	MULTI-MSMS	FU20160819-04	789.02	3	789.018	2364.03	68462.7	3.9366	0.003106	0.04642	3.6626e-05	3.983	0.0031427	789.017	55.023	0.084915	55.023	54.969	55.054	-3.8147e-06					12	10	2	0	0	0	0.0065192	1	24353	68.123
	DFSETYERYHTESLQNMSK	19	Unmodified	_DFSETYERYHTESLQNMSK_					0	0	0	1	HEXI1_HUMANProteinHEXIM1	HEXI1_HUMANProteinHEXIM1	HEXI1_HUMANProteinHEXIM1	MULTI-MSMS	FU20160819-04	592.268	4	592.015	2364.03	77651.6	3.558	0.0021064	-0.68187	-0.00040368	2.8762	0.0017027	592.266	58.357	0.20575	58.357	58.242	58.448	0					100	24	6	0	0	0	0.02685	1	26676	49.924
	DFSETYERYHTESLQNMSK	19	Unmodified	_DFSETYERYHTESLQNMSK_					0	0	0	1	HEXI1_HUMANProteinHEXIM1	HEXI1_HUMANProteinHEXIM1	HEXI1_HUMANProteinHEXIM1	MULTI-MSMS	FU20160819-04	789.355	3	789.018	2364.03	68032.4	4.0868	0.0032246	-1.0012	-0.00078995	3.0856	0.0024346	789.352	58.409	0.34419	58.409	58.235	58.579	0					152	39	6	0	0	0	5.1254e-16	1	26742	152.9
	DFSETYERYHTESLQNMSK	19	Unmodified	_DFSETYERYHTESLQNMSK_					0	0	0	1	HEXI1_HUMANProteinHEXIM1	HEXI1_HUMANProteinHEXIM1	HEXI1_HUMANProteinHEXIM1	MULTI-MSMS	FU20160819-05	789.688	3	789.018	2364.03	70164.9	2.7972	0.002207	0.36662	0.00028927	3.1638	0.0024963	789.018	55.053	0.14478	55.053	54.984	55.129	0					28	17	2	0	0	0	0.0017163	1	23719	80.508
	DFSETYERYHTESLQNMSK	19	Unmodified	_DFSETYERYHTESLQNMSK_					0	0	0	1	HEXI1_HUMANProteinHEXIM1	HEXI1_HUMANProteinHEXIM1	HEXI1_HUMANProteinHEXIM1	MULTI-MSMS	FU20160819-05	789.02	3	789.018	2364.03	68946.6	3.1595	0.0024929	-0.47494	-0.00037474	2.6846	0.0021182	789.352	58.569	0.42397	58.569	58.31	58.734	3.8147e-06					210	49	6	0	0	0	0.0024333	1	26197	73.597
	DFSETYERYHTESLQNMSK	19	Unmodified	_DFSETYERYHTESLQNMSK_					0	0	0	1	HEXI1_HUMANProteinHEXIM1	HEXI1_HUMANProteinHEXIM1	HEXI1_HUMANProteinHEXIM1	MULTI-MSMS	FU20160819-08	789.355	3	789.018	2364.03	69139.9	1.9624	0.0015484	0.43856	0.00034603	2.401	0.0018944	789.353	58.84	0.31546	58.84	58.664	58.979	0					134	39	5	0	0	0	5.0589e-08	1	25737	118.23
284289296	DFSETYERYHTESLQNMSKQELIKEYLELEK	31	Unmodified	_DFSETYERYHTESLQNMSKQELIKEYLELEK_					0	0	0	3	HEXI1_HUMANProteinHEXIM1	HEXI1_HUMANProteinHEXIM1	HEXI1_HUMANProteinHEXIM1	MULTI-MSMS	FU20160819-05	777.181	5	776.978	3879.85	68562.4	2.0177	0.0015677	1.0433	0.0008106	3.061	0.0023783	777.179	89.779	0.4353	89.779	89.57	90.005	0					178	38	7	0	0	0	0.00011461	2	51846	55.852
	DFSETYERYHTESLQNMSKQELIKEYLELEK	31	Unmodified	_DFSETYERYHTESLQNMSKQELIKEYLELEK_					0	0	0	3	HEXI1_HUMANProteinHEXIM1	HEXI1_HUMANProteinHEXIM1	HEXI1_HUMANProteinHEXIM1	MULTI-MSMS	FU20160819-07	777.385	5	776.978	3879.85	68165.4	0.0072931	5.6666e-06	2.7668	0.0021498	2.7741	0.0021554	777.18	88.679	0.44459	88.679	88.522	88.967	0					210	42	7	0	0	0	0.00027212	1	49144	53.679
	DFSETYERYHTESLQNMSKQELIKEYLELEK	31	Unmodified	_DFSETYERYHTESLQNMSKQELIKEYLELEK_					0	0	0	3	HEXI1_HUMANProteinHEXIM1	HEXI1_HUMANProteinHEXIM1	HEXI1_HUMANProteinHEXIM1	MULTI-MSMS	FU20160819-07	647.985	6	647.649	3879.85	73058.1	1.6278	0.0010543	1.7251	0.0011173	3.353	0.0021715	647.818	88.74	0.066139	88.74	88.692	88.758	0					7	6	2	0	0	0	0.0002954	1	49302	53.184
	DFSETYERYHTESLQNMSKQELIKEYLELEK	31	Unmodified	_DFSETYERYHTESLQNMSKQELIKEYLELEK_					0	0	0	3	HEXI1_HUMANProteinHEXIM1	HEXI1_HUMANProteinHEXIM1	HEXI1_HUMANProteinHEXIM1	MULTI-MSMS	FU20160819-08	777.18	5	776.978	3879.85	67440.3	1.7197	0.0013362	1.6471	0.0012798	3.3669	0.002616	777.38	88.818	0.41788	88.818	88.673	89.091	0					166	36	9	0	0	0	4.5142e-07	2	50304	61.89
90129	EGEKGQNGDDSSAGGDFPPPAEVEPTPEAELLAQPCHDSEASK	43	Unmodified	_EGEKGQNGDDSSAGGDFPPPAEVEPTPEAELLAQPCHDSEASK_					0	0	0	1	HEXI1_HUMANProteinHEXIM1	HEXI1_HUMANProteinHEXIM1	HEXI1_HUMANProteinHEXIM1	MULTI-MSMS	FU20160819-04	1113.5	4	1113.24	4448.95	57331.3	2.595	0.0028888	-0.13781	-0.00015342	2.4571	0.0027354	1113.75	67.101	0.058655	67.101	67.074	67.133	0					47	7	7	0	0	0	4.6474e-10	1	32489	56.942
	EGEKGQNGDDSSAGGDFPPPAEVEPTPEAELLAQPCHDSEASK	43	Unmodified	_EGEKGQNGDDSSAGGDFPPPAEVEPTPEAELLAQPCHDSEASK_					0	0	0	1	HEXI1_HUMANProteinHEXIM1	HEXI1_HUMANProteinHEXIM1	HEXI1_HUMANProteinHEXIM1	MULTI-MSMS	FU20160819-04	1483.99	3	1483.99	4448.95	49889.3	2.5663	0.0038083	0.015478	2.297e-05	2.5817	0.0038313	1484.99	67.17	0.052628	67.17	67.133	67.185	0					13	6	3	0	0	0	4.448e-05	1	32522	40.767
	EGEKGQNGDDSSAGGDFPPPAEVEPTPEAELLAQPCHDSEASK	43	Unmodified	_EGEKGQNGDDSSAGGDFPPPAEVEPTPEAELLAQPCHDSEASK_					0	0	0	1	HEXI1_HUMANProteinHEXIM1	HEXI1_HUMANProteinHEXIM1	HEXI1_HUMANProteinHEXIM1	MULTI-MSMS	FU20160819-04	891.4	5	890.797	4448.95	62471.7	3.2121	0.0028613	-0.70376	-0.00062691	2.5083	0.0022344	891.197	67.415	0.353	67.415	67.221	67.574	0					93	43	3	0	0	0	1.7147e-06	2	32663	50.941
	EGEKGQNGDDSSAGGDFPPPAEVEPTPEAELLAQPCHDSEASK	43	Unmodified	_EGEKGQNGDDSSAGGDFPPPAEVEPTPEAELLAQPCHDSEASK_					0	0	0	1	HEXI1_HUMANProteinHEXIM1	HEXI1_HUMANProteinHEXIM1	HEXI1_HUMANProteinHEXIM1	MULTI-MSMS	FU20160819-04	1113.75	4	1113.24	4448.95	57229.4	2.56	0.0028499	-0.31942	-0.00035559	2.2406	0.0024943	1113.75	67.45	0.44135	67.45	67.133	67.574	0					175	55	10	0	0	0	1.5691e-13	1	32671	58.376
	EGEKGQNGDDSSAGGDFPPPAEVEPTPEAELLAQPCHDSEASK	43	Unmodified	_EGEKGQNGDDSSAGGDFPPPAEVEPTPEAELLAQPCHDSEASK_					0	0	0	1	HEXI1_HUMANProteinHEXIM1	HEXI1_HUMANProteinHEXIM1	HEXI1_HUMANProteinHEXIM1	MULTI-MSMS	FU20160819-04	1484.66	3	1483.99	4448.95	50293.5	2.5382	0.0037666	0.099493	0.00014765	2.6377	0.0039142	1484.66	67.448	0.30964	67.448	67.271	67.581	0					101	37	6	0	0	0	1.4838e-06	1	32701	48.248
	EGEKGQNGDDSSAGGDFPPPAEVEPTPEAELLAQPCHDSEASK	43	Unmodified	_EGEKGQNGDDSSAGGDFPPPAEVEPTPEAELLAQPCHDSEASK_					0	0	0	1	HEXI1_HUMANProteinHEXIM1	HEXI1_HUMANProteinHEXIM1	HEXI1_HUMANProteinHEXIM1	MULTI-MSMS	FU20160819-04	1113.75	4	1113.24	4448.95	57229.4	2.6905	0.0029952	-0.54387	-0.00060545	2.1466	0.0023897	1113.74	67.702	0.52465	67.702	67.626	68.151	0					502	69	9	0	0	0	2.3976e-14	1	32837	62.575
	EGEKGQNGDDSSAGGDFPPPAEVEPTPEAELLAQPCHDSEASK	43	Unmodified	_EGEKGQNGDDSSAGGDFPPPAEVEPTPEAELLAQPCHDSEASK_					0	0	0	1	HEXI1_HUMANProteinHEXIM1	HEXI1_HUMANProteinHEXIM1	HEXI1_HUMANProteinHEXIM1	MULTI-MSMS	FU20160819-04	1484.66	3	1483.99	4448.95	49961.6	2.8983	0.0043011	-1.0391	-0.001542	1.8592	0.0027591	1484.66	68.302	0.22084	68.302	68.142	68.363	0					80	28	6	0	0	0	1.3951e-27	2	33106	71.344
	EGEKGQNGDDSSAGGDFPPPAEVEPTPEAELLAQPCHDSEASK	43	Unmodified	_EGEKGQNGDDSSAGGDFPPPAEVEPTPEAELLAQPCHDSEASK_					0	0	0	1	HEXI1_HUMANProteinHEXIM1	HEXI1_HUMANProteinHEXIM1	HEXI1_HUMANProteinHEXIM1	MULTI-MSMS	FU20160819-04	1483.99	3	1483.99	4448.95	50049.3	2.9537	0.0043832	-2.0602	-0.0030573	0.89343	0.0013258	1484.99	68.397	0.21283	68.397	68.254	68.467	0					104	27	8	0	0	0	3.3022e-06	1	33142	45.49
	EGEKGQNGDDSSAGGDFPPPAEVEPTPEAELLAQPCHDSEASK	43	Unmodified	_EGEKGQNGDDSSAGGDFPPPAEVEPTPEAELLAQPCHDSEASK_					0	0	0	1	HEXI1_HUMANProteinHEXIM1	HEXI1_HUMANProteinHEXIM1	HEXI1_HUMANProteinHEXIM1	MULTI-MSMS	FU20160819-04	1484.99	3	1483.99	4448.95	49961.5	3.0578	0.0045378	-2.7012	-0.0040086	0.3566	0.00052919	1484.99	68.552	0.31055	68.552	68.467	68.778	0					244	33	8	0	0	0	1.4677e-05	1	33429	44.185
	EGEKGQNGDDSSAGGDFPPPAEVEPTPEAELLAQPCHDSEASK	43	Unmodified	_EGEKGQNGDDSSAGGDFPPPAEVEPTPEAELLAQPCHDSEASK_					0	0	0	1	HEXI1_HUMANProteinHEXIM1	HEXI1_HUMANProteinHEXIM1	HEXI1_HUMANProteinHEXIM1	MULTI-MSMS	FU20160819-04	1113.5	4	1113.24	4448.95	58691.5	1.8094	0.0020143	-2.6937	-0.0029987	-0.88432	-0.00098446	1113.74	72.763	0.28701	72.763	72.638	72.925	0					56	36	3	0	0	0	0.0070772	2	36624	32.218
	EGEKGQNGDDSSAGGDFPPPAEVEPTPEAELLAQPCHDSEASK	43	Unmodified	_EGEKGQNGDDSSAGGDFPPPAEVEPTPEAELLAQPCHDSEASK_					0	0	0	1	HEXI1_HUMANProteinHEXIM1	HEXI1_HUMANProteinHEXIM1	HEXI1_HUMANProteinHEXIM1	MULTI-SECPEP	FU20160819-04	742.666	6	742.498	4448.95	69413.3	1.8817	0.0013972	-2.7957	-0.0020758	-0.91403	-0.00067867	742.83	69.446	0.13559	69.446	69.326	69.462	0					31	17	3	0	0	0	0.0086941	1	33889	32.731
	EGEKGQNGDDSSAGGDFPPPAEVEPTPEAELLAQPCHDSEASK	43	Unmodified	_EGEKGQNGDDSSAGGDFPPPAEVEPTPEAELLAQPCHDSEASK_					0	0	0	1	HEXI1_HUMANProteinHEXIM1	HEXI1_HUMANProteinHEXIM1	HEXI1_HUMANProteinHEXIM1	MULTI-MSMS	FU20160819-05	891.199	5	890.797	4448.95	64134.4	2.3004	0.0020492	-0.43988	-0.00039185	1.8606	0.0016574	891.197	67.309	0.074371	67.309	67.269	67.343	-7.6294e-06					16	9	3	0	0	0	1.359e-07	1	32044	51.452
	EGEKGQNGDDSSAGGDFPPPAEVEPTPEAELLAQPCHDSEASK	43	Unmodified	_EGEKGQNGDDSSAGGDFPPPAEVEPTPEAELLAQPCHDSEASK_					0	0	0	1	HEXI1_HUMANProteinHEXIM1	HEXI1_HUMANProteinHEXIM1	HEXI1_HUMANProteinHEXIM1	MULTI-MSMS	FU20160819-05	1113.75	4	1113.24	4448.95	57388	1.9707	0.0021939	-0.074776	-8.3244e-05	1.896	0.0021107	1113.75	67.835	2.5523	67.835	66.885	69.438	0					1544	334	9	0	0	0	1.5176e-35	3	32245	77.601
	EGEKGQNGDDSSAGGDFPPPAEVEPTPEAELLAQPCHDSEASK	43	Unmodified	_EGEKGQNGDDSSAGGDFPPPAEVEPTPEAELLAQPCHDSEASK_					0	0	0	1	HEXI1_HUMANProteinHEXIM1	HEXI1_HUMANProteinHEXIM1	HEXI1_HUMANProteinHEXIM1	MULTI-MSMS	FU20160819-05	1484.99	3	1483.99	4448.95	49964.9	1.7303	0.0025678	-1.1243	-0.0016684	0.60605	0.00089937	1484.66	68.602	0.6352	68.602	68.327	68.962	0					338	77	6	0	0	0	2.612e-06	2	32852	45.778
	EGEKGQNGDDSSAGGDFPPPAEVEPTPEAELLAQPCHDSEASK	43	Unmodified	_EGEKGQNGDDSSAGGDFPPPAEVEPTPEAELLAQPCHDSEASK_					0	0	0	1	HEXI1_HUMANProteinHEXIM1	HEXI1_HUMANProteinHEXIM1	HEXI1_HUMANProteinHEXIM1	MULTI-MSMS	FU20160819-05	891.399	5	890.797	4448.95	62157.3	2.6414	0.0023529	-2.112	-0.0018814	0.52937	0.00047156	891.196	68.855	0.41516	68.855	68.672	69.087	0					139	45	4	0	0	0	1.4087e-05	1	32936	46.939
	EGEKGQNGDDSSAGGDFPPPAEVEPTPEAELLAQPCHDSEASK	43	Unmodified	_EGEKGQNGDDSSAGGDFPPPAEVEPTPEAELLAQPCHDSEASK_					0	0	0	1	HEXI1_HUMANProteinHEXIM1	HEXI1_HUMANProteinHEXIM1	HEXI1_HUMANProteinHEXIM1	MULTI-MSMS	FU20160819-05	1484.99	3	1483.99	4448.95	49709.8	1.7797	0.0026411	-2.4603	-0.0036511	-0.68058	-0.00101	1484.65	69.236	0.56183	69.236	68.728	69.29	0					110	65	2	0	0	0	0.0011908	1	33154	36.943
	EGEKGQNGDDSSAGGDFPPPAEVEPTPEAELLAQPCHDSEASK	43	Unmodified	_EGEKGQNGDDSSAGGDFPPPAEVEPTPEAELLAQPCHDSEASK_					0	0	0	1	HEXI1_HUMANProteinHEXIM1	HEXI1_HUMANProteinHEXIM1	HEXI1_HUMANProteinHEXIM1	MULTI-MSMS	FU20160819-05	1484.66	3	1483.99	4448.95	49989.2	1.6787	0.0024912	-2.9017	-0.0043061	-1.223	-0.0018149	1484.99	70.149	0.59927	70.149	69.987	70.586	0					268	68	7	0	0	0	0.01423	1	34041	30.005
	EGEKGQNGDDSSAGGDFPPPAEVEPTPEAELLAQPCHDSEASK	43	Unmodified	_EGEKGQNGDDSSAGGDFPPPAEVEPTPEAELLAQPCHDSEASK_					0	0	0	1	HEXI1_HUMANProteinHEXIM1	HEXI1_HUMANProteinHEXIM1	HEXI1_HUMANProteinHEXIM1	MULTI-MSMS	FU20160819-05	1114	4	1113.24	4448.95	57161.6	2.0646	0.0022984	-3.1895	-0.0035507	-1.1249	-0.0012523	1113.99	72.66	0.21342	72.66	72.531	72.744	7.6294e-06					38	26	2	0	0	0	0.00032002	1	36008	38.985
	EGEKGQNGDDSSAGGDFPPPAEVEPTPEAELLAQPCHDSEASK	43	Unmodified	_EGEKGQNGDDSSAGGDFPPPAEVEPTPEAELLAQPCHDSEASK_					0	0	0	1	HEXI1_HUMANProteinHEXIM1	HEXI1_HUMANProteinHEXIM1	HEXI1_HUMANProteinHEXIM1	MULTI-SECPEP	FU20160819-05	743.169	6	742.498	4448.95	68975.2	1.133	0.00084122	-1.5157	-0.0011254	-0.38279	-0.00028422	742.998	69.22	0.18094	69.22	69.109	69.29	-7.6294e-06					33	23	2	0	0	0	0.026799	1	33179	22.931
	EGEKGQNGDDSSAGGDFPPPAEVEPTPEAELLAQPCHDSEASK	43	Unmodified	_EGEKGQNGDDSSAGGDFPPPAEVEPTPEAELLAQPCHDSEASK_					0	0	0	1	HEXI1_HUMANProteinHEXIM1	HEXI1_HUMANProteinHEXIM1	HEXI1_HUMANProteinHEXIM1	MULTI-SECPEP	FU20160819-05	890.798	5	890.797	4448.95	62221	2.464	0.0021949	-0.20097	-0.00017903	2.263	0.0020159	891.198	68.008	0.40924	68.008	67.896	68.306	0					111	56	3	0	0	0	2.9504e-16	1	32480	85.784
	EGEKGQNGDDSSAGGDFPPPAEVEPTPEAELLAQPCHDSEASK	43	Unmodified	_EGEKGQNGDDSSAGGDFPPPAEVEPTPEAELLAQPCHDSEASK_					0	0	0	1	HEXI1_HUMANProteinHEXIM1	HEXI1_HUMANProteinHEXIM1	HEXI1_HUMANProteinHEXIM1	MULTI-SECPEP	FU20160819-05	1113.74	4	1113.24	4448.95	58575.9	2.3615	0.0026289	-2.7754	-0.0030897	-0.41392	-0.00046079	1113.74	74.105	0.43547	74.105	73.886	74.322	0					114	49	4	0	0	0	0.023961	1	37364	30.673
	ELELELDR	8	Unmodified	_ELELELDR_					0	0	0	0	HEXI1_HUMANProteinHEXIM1	HEXI1_HUMANProteinHEXIM1	HEXI1_HUMANProteinHEXIM1	MULTI-MSMS	FU20160819-04	508.77	2	508.767	1015.52	83275.1	2.9671	0.0015095	-0.79968	-0.00040685	2.1674	0.0011027	508.766	55.834	0.42041	55.834	55.554	55.975	0					260	54	6	0	0	0	0.0064257	2	24778	149.4
	ELELELDR	8	Unmodified	_ELELELDR_					0	0	0	0	HEXI1_HUMANProteinHEXIM1	HEXI1_HUMANProteinHEXIM1	HEXI1_HUMANProteinHEXIM1	MULTI-MSMS	FU20160819-04	508.768	2	508.767	1015.52	84173.1	2.9558	0.0015038	-0.88941	-0.0004525	2.0663	0.0010513	508.766	56.081	0.36933	56.081	55.967	56.337	0					239	50	6	0	0	0	3.5819e-27	1	25206	194.25
	ELELELDR	8	Unmodified	_ELELELDR_					0	0	0	0	HEXI1_HUMANProteinHEXIM1	HEXI1_HUMANProteinHEXIM1	HEXI1_HUMANProteinHEXIM1	MULTI-MSMS	FU20160819-04	1018.53	1	1016.53	1015.52	61003.8	2.428	0.0024681	0.28112	0.00028577	2.7091	0.0027539	1016.53	56.564	0.13336	56.564	56.532	56.665	0					62	17	5	0	0	0	0.028772	1	25408	98.458
	ELELELDR	8	Unmodified	_ELELELDR_					0	0	0	0	HEXI1_HUMANProteinHEXIM1	HEXI1_HUMANProteinHEXIM1	HEXI1_HUMANProteinHEXIM1	MULTI-MSMS	FU20160819-04	508.768	2	508.767	1015.52	84890.7	2.9707	0.0015114	-0.68808	-0.00035007	2.2826	0.0011613	508.766	56.565	0.29494	56.565	56.476	56.771	0					145	38	7	0	0	0	0.0076657	1	25434	152.47
	ELELELDR	8	Unmodified	_ELELELDR_					0	0	0	0	HEXI1_HUMANProteinHEXIM1	HEXI1_HUMANProteinHEXIM1	HEXI1_HUMANProteinHEXIM1	MULTI-MSMS	FU20160819-04	508.768	2	508.767	1015.52	83467.6	2.9839	0.0015181	-0.65996	-0.00033577	2.3239	0.0011823	508.766	56.959	0.18199	56.959	56.913	57.095	3.8147e-06					89	23	5	0	0	0	0.0056091	1	25636	147.52
	ELELELDR	8	Unmodified	_ELELELDR_					0	0	0	0	HEXI1_HUMANProteinHEXIM1	HEXI1_HUMANProteinHEXIM1	HEXI1_HUMANProteinHEXIM1	MULTI-MSMS	FU20160819-04	508.768	2	508.767	1015.52	85315	2.9973	0.0015249	-0.35935	-0.00018282	2.6379	0.0013421	508.766	57.07	0.39275	57.07	57.037	57.43	0					77	48	2	0	0	0	0.0056091	1	25904	147.52
	ELELELDR	8	Unmodified	_ELELELDR_					0	0	0	0	HEXI1_HUMANProteinHEXIM1	HEXI1_HUMANProteinHEXIM1	HEXI1_HUMANProteinHEXIM1	MULTI-MSMS	FU20160819-04	508.768	2	508.767	1015.52	84890.8	3.0044	0.0015286	0.039411	2.0051e-05	3.0438	0.0015486	508.767	57.477	0.23314	57.477	57.415	57.648	0					71	28	3	0	0	0	0.010294	1	26159	119.17
	ELELELDR	8	Unmodified	_ELELELDR_					0	0	0	0	HEXI1_HUMANProteinHEXIM1	HEXI1_HUMANProteinHEXIM1	HEXI1_HUMANProteinHEXIM1	MULTI-MSMS	FU20160819-04	508.768	2	508.767	1015.52	85315	3.1648	0.0016101	-0.35026	-0.0001782	2.8145	0.0014319	508.766	57.888	0.21469	57.888	57.821	58.036	0					73	26	4	0	0	0	0.011328	1	26404	166.78
	ELELELDR	8	Unmodified	_ELELELDR_					0	0	0	0	HEXI1_HUMANProteinHEXIM1	HEXI1_HUMANProteinHEXIM1	HEXI1_HUMANProteinHEXIM1	MULTI-MSMS	FU20160819-04	508.768	2	508.767	1015.52	84173.2	3.3695	0.0017143	-0.25877	-0.00013165	3.1107	0.0015826	508.766	58.153	0.43555	58.153	58.029	58.464	3.8147e-06					144	52	4	0	0	0	0.011351	1	26693	129.47
	ELELELDR	8	Unmodified	_ELELELDR_					0	0	0	0	HEXI1_HUMANProteinHEXIM1	HEXI1_HUMANProteinHEXIM1	HEXI1_HUMANProteinHEXIM1	MULTI-MSMS	FU20160819-04	508.768	2	508.767	1015.52	85314.9	3.635	0.0018493	-0.63023	-0.00032064	3.0047	0.0015287	508.766	58.614	0.23447	58.614	58.464	58.699	0					38	25	2	0	0	0	0.017128	1	26971	162.5
	ELELELDR	8	Unmodified	_ELELELDR_					0	0	0	0	HEXI1_HUMANProteinHEXIM1	HEXI1_HUMANProteinHEXIM1	HEXI1_HUMANProteinHEXIM1	MULTI-MSMS	FU20160819-04	508.768	2	508.767	1015.52	84890.7	3.4192	0.0017396	-0.20369	-0.00010363	3.2155	0.0016359	508.766	59.038	0.18414	59.038	58.926	59.11	3.8147e-06					44	21	4	0	0	0	0.0056091	1	27213	147.52
	ELELELDR	8	Unmodified	_ELELELDR_					0	0	0	0	HEXI1_HUMANProteinHEXIM1	HEXI1_HUMANProteinHEXIM1	HEXI1_HUMANProteinHEXIM1	MULTI-MSMS	FU20160819-04	508.768	2	508.767	1015.52	84890.8	3.172	0.0016138	0.21527	0.00010952	3.3873	0.0017233	508.767	59.42	0.20378	59.42	59.306	59.509	3.8147e-06					57	23	3	0	0	0	0.0076657	1	27478	152.47
	ELELELDR	8	Unmodified	_ELELELDR_					0	0	0	0	HEXI1_HUMANProteinHEXIM1	HEXI1_HUMANProteinHEXIM1	HEXI1_HUMANProteinHEXIM1	MULTI-MSMS	FU20160819-04	508.768	2	508.767	1015.52	84890.8	3.0426	0.001548	0.32711	0.00016642	3.3697	0.0017144	508.767	59.622	0.20119	59.622	59.509	59.711	0					53	22	3	0	0	0	0.010794	1	27719	133.12
	ELELELDR	8	Unmodified	_ELELELDR_					0	0	0	0	HEXI1_HUMANProteinHEXIM1	HEXI1_HUMANProteinHEXIM1	HEXI1_HUMANProteinHEXIM1	MULTI-MSMS	FU20160819-04	508.768	2	508.767	1015.52	84890.8	2.7666	0.0014075	0.27256	0.00013867	3.0391	0.0015462	508.767	60.023	0.259	60.023	59.937	60.196	0					52	29	3	0	0	0	0.0056091	1	27979	147.52
	ELELELDR	8	Unmodified	_ELELELDR_					0	0	0	0	HEXI1_HUMANProteinHEXIM1	HEXI1_HUMANProteinHEXIM1	HEXI1_HUMANProteinHEXIM1	MULTI-MSMS	FU20160819-04	508.767	2	508.767	1015.52	85315.1	2.5163	0.0012802	0.73407	0.00037347	3.2503	0.0016537	508.767	60.43	0.14241	60.43	60.323	60.466	0					22	16	2	0	0	0	0.0056091	1	28240	147.52
	ELELELDR	8	Unmodified	_ELELELDR_					0	0	0	0	HEXI1_HUMANProteinHEXIM1	HEXI1_HUMANProteinHEXIM1	HEXI1_HUMANProteinHEXIM1	MULTI-MSMS	FU20160819-04	508.768	2	508.767	1015.52	85994	3.5714	0.001817	0.025135	1.2788e-05	3.5965	0.0018298	508.766	64.875	0.29301	64.875	64.77	65.063	0					37	35	2	0	0	0	0.011567	1	30886	117.4
	ELELELDR	8	Unmodified	_ELELELDR_					0	0	0	0	HEXI1_HUMANProteinHEXIM1	HEXI1_HUMANProteinHEXIM1	HEXI1_HUMANProteinHEXIM1	MULTI-MSMS	FU20160819-04	509.27	2	508.767	1015.52	86045.6	3.2438	0.0016503	-0.26571	-0.00013518	2.9781	0.0015152	508.766	65.321	0.22182	65.321	65.205	65.426	0					30	21	2	0	0	0	0.0079436	1	31275	122.74
	ELELELDR	8	Unmodified	_ELELELDR_					0	0	0	0	HEXI1_HUMANProteinHEXIM1	HEXI1_HUMANProteinHEXIM1	HEXI1_HUMANProteinHEXIM1	MSMS	FU20160819-04	508.768	2	508.767	1015.52	NaN	NaN	NaN	NaN	NaN	NaN	NaN	NaN	61.329	1	61.329	60.829	61.829	-3.8147e-06								0	0	0	0.016188	1	28916	130.27
	ELELELDR	8	Unmodified	_ELELELDR_					0	0	0	0	HEXI1_HUMANProteinHEXIM1	HEXI1_HUMANProteinHEXIM1	HEXI1_HUMANProteinHEXIM1	MSMS	FU20160819-04	508.768	2	508.767	1015.52	NaN	NaN	NaN	NaN	NaN	NaN	NaN	NaN	62.342	1	62.342	61.842	62.842	3.8147e-06								0	0	0	0.027469	1	29356	96.492
	ELELELDR	8	Unmodified	_ELELELDR_					0	0	0	0	HEXI1_HUMANProteinHEXIM1	HEXI1_HUMANProteinHEXIM1	HEXI1_HUMANProteinHEXIM1	MSMS	FU20160819-04	508.769	2	508.767	1015.52	NaN	NaN	NaN	NaN	NaN	NaN	NaN	NaN	64.496	1	64.496	63.996	64.996	0								0	0	0	0.016873	1	30641	110.31
	ELELELDR	8	Unmodified	_ELELELDR_					0	0	0	0	HEXI1_HUMANProteinHEXIM1	HEXI1_HUMANProteinHEXIM1	HEXI1_HUMANProteinHEXIM1	MSMS	FU20160819-04	508.767	2	508.767	1015.52	NaN	NaN	NaN	NaN	NaN	NaN	NaN	NaN	65.185	1	65.185	64.685	65.685	0								0	0	0	0.012543	1	31119	119.29
	ELELELDR	8	Unmodified	_ELELELDR_					0	0	0	0	HEXI1_HUMANProteinHEXIM1	HEXI1_HUMANProteinHEXIM1	HEXI1_HUMANProteinHEXIM1	MSMS	FU20160819-04	508.768	2	508.767	1015.52	NaN	NaN	NaN	NaN	NaN	NaN	NaN	NaN	65.764	1	65.764	65.264	66.264	0								0	0	0	0.013182	1	31602	106.36
	ELELELDR	8	Unmodified	_ELELELDR_					0	0	0	0	HEXI1_HUMANProteinHEXIM1	HEXI1_HUMANProteinHEXIM1	HEXI1_HUMANProteinHEXIM1	MULTI-SECPEP	FU20160819-04	1016.01	1	1016.53	1015.52	61217.4	2.4699	0.0025107	0.39944	0.00040604	2.8693	0.0029168	1016.53	57.703	0.22282	57.703	57.584	57.807	0					42	27	2	0	0	0	0.022444	1	26181	84.916
	ELELELDR	8	Unmodified	_ELELELDR_					0	0	0	0	HEXI1_HUMANProteinHEXIM1	HEXI1_HUMANProteinHEXIM1	HEXI1_HUMANProteinHEXIM1	MULTI-MSMS	FU20160819-05	508.768	2	508.767	1015.52	83907.7	2.2192	0.001129	-0.23475	-0.00011943	1.9844	0.0010096	508.766	55.982	0.72157	55.982	55.611	56.333	0					506	97	6	0	0	0	0.008074	1	24412	157.58
	ELELELDR	8	Unmodified	_ELELELDR_					0	0	0	0	HEXI1_HUMANProteinHEXIM1	HEXI1_HUMANProteinHEXIM1	HEXI1_HUMANProteinHEXIM1	MULTI-MSMS	FU20160819-05	508.768	2	508.767	1015.52	83304.2	2.2335	0.0011363	-0.061767	-3.1425e-05	2.1718	0.0011049	508.767	56.29	2.2353	56.29	56.241	58.476	0					977	295	5	0	0	0	0.0064257	7	24622	161.68
	ELELELDR	8	Unmodified	_ELELELDR_					0	0	0	0	HEXI1_HUMANProteinHEXIM1	HEXI1_HUMANProteinHEXIM1	HEXI1_HUMANProteinHEXIM1	MULTI-MSMS	FU20160819-05	508.768	2	508.767	1015.52	84520.1	2.5078	0.0012759	0.29162	0.00014837	2.7994	0.0014242	508.767	58.546	0.27187	58.546	58.455	58.727	0					54	29	3	0	0	0	0.0064257	1	26405	149.4
	ELELELDR	8	Unmodified	_ELELELDR_					0	0	0	0	HEXI1_HUMANProteinHEXIM1	HEXI1_HUMANProteinHEXIM1	HEXI1_HUMANProteinHEXIM1	MULTI-MSMS	FU20160819-05	508.768	2	508.767	1015.52	84520	2.5532	0.001299	-0.16383	-8.335e-05	2.3893	0.0012156	508.766	58.758	0.34248	58.758	58.727	59.069	0					71	38	3	0	0	0	0.0048414	1	26665	145.34
	ELELELDR	8	Unmodified	_ELELELDR_					0	0	0	0	HEXI1_HUMANProteinHEXIM1	HEXI1_HUMANProteinHEXIM1	HEXI1_HUMANProteinHEXIM1	MULTI-MSMS	FU20160819-05	508.768	2	508.767	1015.52	84520.1	2.5954	0.0013204	0.40661	0.00020687	3.002	0.0015273	508.767	59.44	0.66443	59.44	59.395	60.059	3.8147e-06					123	80	3	0	0	0	0.0056091	2	27205	147.52
	ELELELDR	8	Unmodified	_ELELELDR_					0	0	0	0	HEXI1_HUMANProteinHEXIM1	HEXI1_HUMANProteinHEXIM1	HEXI1_HUMANProteinHEXIM1	MULTI-MSMS	FU20160819-05	508.767	2	508.767	1015.52	85145.4	2.2997	0.00117	0.07403	3.7664e-05	2.3737	0.0012077	508.766	60.115	0.17956	60.115	60.059	60.239	0					37	21	2	0	0	0	0.0042946	1	27497	143.12
	ELELELDR	8	Unmodified	_ELELELDR_					0	0	0	0	HEXI1_HUMANProteinHEXIM1	HEXI1_HUMANProteinHEXIM1	HEXI1_HUMANProteinHEXIM1	MULTI-MSMS	FU20160819-05	508.768	2	508.767	1015.52	85145.4	2.0735	0.0010549	0.42884	0.00021818	2.5023	0.0012731	508.767	60.45	0.41291	60.45	60.202	60.615	0					72	47	2	0	0	0	0.0056091	1	27760	147.52
	ELELELDR	8	Unmodified	_ELELELDR_					0	0	0	0	HEXI1_HUMANProteinHEXIM1	HEXI1_HUMANProteinHEXIM1	HEXI1_HUMANProteinHEXIM1	MULTI-MSMS	FU20160819-05	508.768	2	508.767	1015.52	89961	2.2405	0.0011399	-0.19079	-9.7068e-05	2.0497	0.0010428	508.767	64.489	0.07859	64.489	64.445	64.524	0					13	9	2	0	0	0	0.029925	1	29941	101.28
	ELELELDR	8	Unmodified	_ELELELDR_					0	0	0	0	HEXI1_HUMANProteinHEXIM1	HEXI1_HUMANProteinHEXIM1	HEXI1_HUMANProteinHEXIM1	MULTI-MSMS	FU20160819-05	508.768	2	508.767	1015.52	83930.8	4.3508	0.0022135	-0.46097	-0.00023453	3.8898	0.001979	508.766	107.54	0.076813	107.54	107.51	107.59	7.6294e-06					7	5	2	0	0	0	0.01996	1	66659	110.31
	ELELELDR	8	Unmodified	_ELELELDR_					0	0	0	0	HEXI1_HUMANProteinHEXIM1	HEXI1_HUMANProteinHEXIM1	HEXI1_HUMANProteinHEXIM1	MSMS	FU20160819-05	508.767	2	508.767	1015.52	NaN	NaN	NaN	NaN	NaN	NaN	NaN	NaN	65.534	1	65.534	65.034	66.034	0								0	0	0	0.013182	1	30769	106.36
	ELELELDR	8	Unmodified	_ELELELDR_					0	0	0	0	HEXI1_HUMANProteinHEXIM1	HEXI1_HUMANProteinHEXIM1	HEXI1_HUMANProteinHEXIM1	MULTI-MSMS	FU20160819-07	508.768	2	508.767	1015.52	83747.9	3.1196	0.0015871	-0.43188	-0.00021973	2.6877	0.0013674	508.766	55.02	1.0366	55.02	54.654	55.691	0					460	131	4	0	0	0	0.0064257	3	21955	149.4
	ELELELDR	8	Unmodified	_ELELELDR_					0	0	0	0	HEXI1_HUMANProteinHEXIM1	HEXI1_HUMANProteinHEXIM1	HEXI1_HUMANProteinHEXIM1	MULTI-MSMS	FU20160819-07	508.768	2	508.767	1015.52	85339.8	3.2777	0.0016676	-0.64251	-0.00032689	2.6352	0.0013407	508.766	55.707	0.65131	55.707	55.637	56.289	0					144	81	2	0	0	0	0.0056091	2	22328	147.52
	ELELELDR	8	Unmodified	_ELELELDR_					0	0	0	0	HEXI1_HUMANProteinHEXIM1	HEXI1_HUMANProteinHEXIM1	HEXI1_HUMANProteinHEXIM1	MULTI-MSMS	FU20160819-07	508.768	2	508.767	1015.52	83334.7	3.6219	0.0018427	-1.2657	-0.00064392	2.3562	0.0011988	508.766	57.722	1.0871	57.722	57.35	58.437	0					196	137	2	0	0	0	0.01205	1	23710	116.73
	ELELELDR	8	Unmodified	_ELELELDR_					0	0	0	0	HEXI1_HUMANProteinHEXIM1	HEXI1_HUMANProteinHEXIM1	HEXI1_HUMANProteinHEXIM1	MULTI-MSMS	FU20160819-08	508.768	2	508.767	1015.52	83359.9	1.6239	0.00082617	0.51574	0.00026239	2.1396	0.0010886	508.767	54.805	0.3907	54.805	54.598	54.989	0					113	46	6	0	0	0	0.019529	1	22838	163.67
	ELELELDR	8	Unmodified	_ELELELDR_					0	0	0	0	HEXI1_HUMANProteinHEXIM1	HEXI1_HUMANProteinHEXIM1	HEXI1_HUMANProteinHEXIM1	MULTI-MSMS	FU20160819-08	508.767	2	508.767	1015.52	84369.8	1.7258	0.00087805	0.86705	0.00044113	2.5929	0.0013192	508.767	54.965	0.45567	54.965	54.942	55.398	0					152	55	5	0	0	0	0.0076657	1	23107	152.47
	ELELELDR	8	Unmodified	_ELELELDR_					0	0	0	0	HEXI1_HUMANProteinHEXIM1	HEXI1_HUMANProteinHEXIM1	HEXI1_HUMANProteinHEXIM1	MULTI-MSMS	FU20160819-08	508.768	2	508.767	1015.52	85286.4	1.8283	0.00093018	0.74279	0.00037791	2.5711	0.0013081	508.767	55.27	0.47627	55.27	55.243	55.72	0					106	58	2	0	0	0	0.0064257	1	23296	149.4
	ELELELDR	8	Unmodified	_ELELELDR_					0	0	0	0	HEXI1_HUMANProteinHEXIM1	HEXI1_HUMANProteinHEXIM1	HEXI1_HUMANProteinHEXIM1	MULTI-MSMS	FU20160819-08	508.768	2	508.767	1015.52	85078.9	2.0748	0.0010556	0.28446	0.00014472	2.3593	0.0012003	508.767	56.183	0.37224	56.183	55.92	56.292	0					85	45	3	0	0	0	0.0056091	1	23779	147.52
	ELELELDR	8	Unmodified	_ELELELDR_					0	0	0	0	HEXI1_HUMANProteinHEXIM1	HEXI1_HUMANProteinHEXIM1	HEXI1_HUMANProteinHEXIM1	MSMS	FU20160819-08	508.768	2	508.767	1015.52	NaN	NaN	NaN	NaN	NaN	NaN	NaN	NaN	55.747	1	55.747	55.247	56.247	0								0	0	0	6.6443e-31	1	23492	166.78
	ELELELDR	8	Unmodified	_ELELELDR_					0	0	0	0	HEXI1_HUMANProteinHEXIM1	HEXI1_HUMANProteinHEXIM1	HEXI1_HUMANProteinHEXIM1	MSMS	FU20160819-08	508.768	2	508.767	1015.52	NaN	NaN	NaN	NaN	NaN	NaN	NaN	NaN	56.574	1	56.574	56.074	57.074	0								0	0	0	1.2073e-12	1	24053	149.4
	ELELELDRLR	10	Unmodified	_ELELELDRLR_					0	0	0	1	HEXI1_HUMANProteinHEXIM1	HEXI1_HUMANProteinHEXIM1	HEXI1_HUMANProteinHEXIM1	MULTI-MSMS	FU20160819-04	643.36	2	643.359	1284.7	77124.5	2.7204	0.0017502	0.46122	0.00029673	3.1817	0.002047	643.861	60.839	0.13606	60.839	60.728	60.864	0					25	14	2	0	0	0	3.373e-17	1	28571	182.39
	ELELELDRLR	10	Unmodified	_ELELELDRLR_					0	0	0	1	HEXI1_HUMANProteinHEXIM1	HEXI1_HUMANProteinHEXIM1	HEXI1_HUMANProteinHEXIM1	MULTI-MSMS	FU20160819-04	429.243	3	429.242	1284.7	91478.1	2.0935	0.00089864	0.42267	0.00018143	2.5162	0.0010801	429.242	60.772	0.18088	60.772	60.699	60.88	0					46	19	4	0	0	0	9.0191e-19	1	28585	204.79
	ELELELDRLR	10	Unmodified	_ELELELDRLR_					0	0	0	1	HEXI1_HUMANProteinHEXIM1	HEXI1_HUMANProteinHEXIM1	HEXI1_HUMANProteinHEXIM1	MULTI-MSMS	FU20160819-04	643.361	2	643.359	1284.7	75581.1	3.5217	0.0022657	-0.54263	-0.00034911	2.979	0.0019166	643.359	65.956	0.19749	65.956	65.822	66.019	0					75	23	6	0	0	0	0.00068086	1	31680	152.11
	ELELELDRLR	10	Unmodified	_ELELELDRLR_					0	0	0	1	HEXI1_HUMANProteinHEXIM1	HEXI1_HUMANProteinHEXIM1	HEXI1_HUMANProteinHEXIM1	MULTI-MSMS	FU20160819-04	643.361	2	643.359	1284.7	75508.7	3.5223	0.0022661	-0.40076	-0.00025783	3.1215	0.0020083	643.359	66.163	0.29108	66.163	66.005	66.296	0					124	35	5	0	0	0	0.001538	1	31888	149.82
	ELELELDRLR	10	Unmodified	_ELELELDRLR_					0	0	0	1	HEXI1_HUMANProteinHEXIM1	HEXI1_HUMANProteinHEXIM1	HEXI1_HUMANProteinHEXIM1	MULTI-MSMS	FU20160819-04	429.243	3	429.242	1284.7	91974.3	2.892	0.0012414	-0.78343	-0.00033628	2.1086	0.0009051	429.242	66.152	0.29525	66.152	66.012	66.307	0					179	35	6	0	0	0	0.015814	1	31895	105.1
	ELELELDRLR	10	Unmodified	_ELELELDRLR_					0	0	0	1	HEXI1_HUMANProteinHEXIM1	HEXI1_HUMANProteinHEXIM1	HEXI1_HUMANProteinHEXIM1	MULTI-MSMS	FU20160819-04	643.361	2	643.359	1284.7	75508.7	3.5205	0.002265	-0.43005	-0.00027667	3.0905	0.0019883	643.359	66.484	0.23627	66.484	66.42	66.656	0					86	27	5	0	0	0	0.021096	1	32163	132.76
	ELELELDRLR	10	Unmodified	_ELELELDRLR_					0	0	0	1	HEXI1_HUMANProteinHEXIM1	HEXI1_HUMANProteinHEXIM1	HEXI1_HUMANProteinHEXIM1	MULTI-MSMS	FU20160819-04	429.243	3	429.242	1284.7	91974.3	2.8903	0.0012406	-0.87454	-0.00037539	2.0157	0.00086524	429.242	66.368	0.28736	66.368	66.296	66.583	0					189	34	6	0	0	0	0.011329	1	32176	112.11
	ELELELDRLR	10	Unmodified	_ELELELDRLR_					0	0	0	1	HEXI1_HUMANProteinHEXIM1	HEXI1_HUMANProteinHEXIM1	HEXI1_HUMANProteinHEXIM1	MULTI-MSMS	FU20160819-04	643.361	2	643.359	1284.7	75581.1	3.4954	0.0022488	-0.47978	-0.00030867	3.0156	0.0019401	643.359	66.872	0.52441	66.872	66.55	67.074	0					231	68	4	0	0	0	9.638e-63	1	32382	209.21
	ELELELDRLR	10	Unmodified	_ELELELDRLR_					0	0	0	1	HEXI1_HUMANProteinHEXIM1	HEXI1_HUMANProteinHEXIM1	HEXI1_HUMANProteinHEXIM1	MULTI-MSMS	FU20160819-04	643.862	2	643.359	1284.7	76861.6	3.9457	0.0025385	-0.73068	-0.00047009	3.215	0.0020684	643.359	68.618	0.16444	68.618	68.553	68.717	0					29	17	3	0	0	0	0.027608	1	33333	125.82
	ELELELDRLR	10	Unmodified	_ELELELDRLR_					0	0	0	1	HEXI1_HUMANProteinHEXIM1	HEXI1_HUMANProteinHEXIM1	HEXI1_HUMANProteinHEXIM1	MSMS	FU20160819-04	643.361	2	643.359	1284.7	NaN	NaN	NaN	NaN	NaN	NaN	NaN	NaN	68.302	1	68.302	67.802	68.802	0								0	0	0	1.8326e-50	1	33084	169.44
	ELELELDRLR	10	Unmodified	_ELELELDRLR_					0	0	0	1	HEXI1_HUMANProteinHEXIM1	HEXI1_HUMANProteinHEXIM1	HEXI1_HUMANProteinHEXIM1	MULTI-MSMS	FU20160819-05	429.243	3	429.242	1284.7	94122.3	1.6562	0.00071089	0.61992	0.00026609	2.2761	0.00097699	429.242	60.767	0.18765	60.767	60.705	60.892	3.8147e-06					57	22	4	0	0	0	0.011481	1	28093	114.89
	ELELELDRLR	10	Unmodified	_ELELELDRLR_					0	0	0	1	HEXI1_HUMANProteinHEXIM1	HEXI1_HUMANProteinHEXIM1	HEXI1_HUMANProteinHEXIM1	MULTI-MSMS	FU20160819-05	643.361	2	643.359	1284.7	76466.4	2.574	0.001656	0.33084	0.00021285	2.9048	0.0018689	643.359	60.771	0.16586	60.771	60.712	60.878	0					32	19	3	0	0	0	0.0013343	1	28094	150.36
	ELELELDRLR	10	Unmodified	_ELELELDRLR_					0	0	0	1	HEXI1_HUMANProteinHEXIM1	HEXI1_HUMANProteinHEXIM1	HEXI1_HUMANProteinHEXIM1	MULTI-MSMS	FU20160819-05	643.361	2	643.359	1284.7	75547.1	2.4725	0.0015907	0.16172	0.00010405	2.6342	0.0016947	643.359	66.069	0.59064	66.069	65.893	66.483	0					336	73	5	0	0	0	1.3701e-96	2	31414	217.64
	ELELELDRLR	10	Unmodified	_ELELELDRLR_					0	0	0	1	HEXI1_HUMANProteinHEXIM1	HEXI1_HUMANProteinHEXIM1	HEXI1_HUMANProteinHEXIM1	MULTI-MSMS	FU20160819-05	429.243	3	429.242	1284.7	92243.6	1.5549	0.00066744	0.039526	1.6966e-05	1.5944	0.0006844	429.242	66.057	0.60249	66.057	65.881	66.483	0					394	74	6	0	0	0	0.014929	1	31413	104.01
	ELELELDRLR	10	Unmodified	_ELELELDRLR_					0	0	0	1	HEXI1_HUMANProteinHEXIM1	HEXI1_HUMANProteinHEXIM1	HEXI1_HUMANProteinHEXIM1	MULTI-MSMS	FU20160819-05	429.243	3	429.242	1284.7	91444.9	1.5708	0.00067424	0.36906	0.00015842	1.9398	0.00083266	429.242	66.72	1.156	66.72	66.467	67.623	0					421	154	5	0	0	0	0.024837	2	32012	93.598
	ELELELDRLR	10	Unmodified	_ELELELDRLR_					0	0	0	1	HEXI1_HUMANProteinHEXIM1	HEXI1_HUMANProteinHEXIM1	HEXI1_HUMANProteinHEXIM1	MULTI-MSMS	FU20160819-05	643.361	2	643.359	1284.7	75916.3	2.4869	0.0016	0.22402	0.00014412	2.7109	0.0017441	643.359	66.662	0.8459	66.662	66.475	67.321	0					322	112	4	0	0	0	3.6896e-63	3	31878	210.6
	ELELELDRLRAENLQLLTENELHR	24	Unmodified	_ELELELDRLRAENLQLLTENELHR_					0	0	0	2	HEXI1_HUMANProteinHEXIM1	HEXI1_HUMANProteinHEXIM1	HEXI1_HUMANProteinHEXIM1	MULTI-MSMS	FU20160819-04	737.901	4	737.397	2945.56	69594.9	2.1169	0.001561	1.5267	0.0011258	3.6436	0.0026868	737.648	92.803	0.086212	92.803	92.759	92.845	0					25	6	5	0	0	0	6.1491e-07	1	55447	86.625
	ELELELDRLRAENLQLLTENELHR	24	Unmodified	_ELELELDRLRAENLQLLTENELHR_					0	0	0	2	HEXI1_HUMANProteinHEXIM1	HEXI1_HUMANProteinHEXIM1	HEXI1_HUMANProteinHEXIM1	MULTI-MSMS	FU20160819-04	737.649	4	737.397	2945.56	69122.2	2.0915	0.0015422	1.9571	0.0014432	4.0486	0.0029854	737.649	93.262	0.23774	93.262	93.114	93.352	0					75	18	7	0	0	0	1.9871e-06	1	55835	84.113
	ELELELDRLRAENLQLLTENELHR	24	Unmodified	_ELELELDRLRAENLQLLTENELHR_					0	0	0	2	HEXI1_HUMANProteinHEXIM1	HEXI1_HUMANProteinHEXIM1	HEXI1_HUMANProteinHEXIM1	MULTI-MSMS	FU20160819-04	590.321	5	590.119	2945.56	75623.3	2.6167	0.0015442	0.79335	0.00046817	3.4101	0.0020123	590.32	93.658	0.20493	93.658	93.521	93.726	0					92	21	9	0	0	0	0.0017242	1	56162	61.139
	ELELELDRLRAENLQLLTENELHR	24	Unmodified	_ELELELDRLRAENLQLLTENELHR_					0	0	0	2	HEXI1_HUMANProteinHEXIM1	HEXI1_HUMANProteinHEXIM1	HEXI1_HUMANProteinHEXIM1	MULTI-MSMS	FU20160819-04	983.198	3	982.86	2945.56	60682.4	2.2193	0.0021813	1.6633	0.0016348	3.8827	0.0038161	983.196	94.004	0.14273	94.004	93.981	94.124	0					32	11	5	0	0	0	0.022868	1	56562	53.718
	ELELELDRLRAENLQLLTENELHR	24	Unmodified	_ELELELDRLRAENLQLLTENELHR_					0	0	0	2	HEXI1_HUMANProteinHEXIM1	HEXI1_HUMANProteinHEXIM1	HEXI1_HUMANProteinHEXIM1	MULTI-MSMS	FU20160819-04	737.65	4	737.397	2945.56	69861.3	2.0673	0.0015244	1.2613	0.00093006	3.3285	0.0024545	737.648	94.271	0.20428	94.271	94.091	94.295	0					108	20	7	0	0	0	0.0040163	1	56724	58.755
	ELELELDRLRAENLQLLTENELHR	24	Unmodified	_ELELELDRLRAENLQLLTENELHR_					0	0	0	2	HEXI1_HUMANProteinHEXIM1	HEXI1_HUMANProteinHEXIM1	HEXI1_HUMANProteinHEXIM1	MULTI-MSMS	FU20160819-04	590.321	5	590.119	2945.56	76035.8	2.5852	0.0015256	0.55768	0.0003291	3.1428	0.0018547	590.52	94.521	0.12086	94.521	94.471	94.592	0					33	11	4	0	0	0	0.023636	1	57068	43.216
	ELELELDRLRAENLQLLTENELHR	24	Unmodified	_ELELELDRLRAENLQLLTENELHR_					0	0	0	2	HEXI1_HUMANProteinHEXIM1	HEXI1_HUMANProteinHEXIM1	HEXI1_HUMANProteinHEXIM1	MULTI-MSMS	FU20160819-04	737.65	4	737.397	2945.56	69863.2	2.2846	0.0016847	0.82349	0.00060724	3.1081	0.0022919	737.648	95.318	0.1515	95.318	95.216	95.367	-7.6294e-06					50	15	5	0	0	0	3.1763e-13	1	57731	118.19
	ELELELDRLRAENLQLLTENELHR	24	Unmodified	_ELELELDRLRAENLQLLTENELHR_					0	0	0	2	HEXI1_HUMANProteinHEXIM1	HEXI1_HUMANProteinHEXIM1	HEXI1_HUMANProteinHEXIM1	MULTI-MSMS	FU20160819-04	590.321	5	590.119	2945.56	73433.8	2.8101	0.0016583	-1.1284	-0.00066587	1.6817	0.00099243	590.319	95.283	0.23137	95.283	95.109	95.34	0					48	24	4	0	0	0	0.010199	1	57783	49.433
	ELELELDRLRAENLQLLTENELHR	24	Unmodified	_ELELELDRLRAENLQLLTENELHR_					0	0	0	2	HEXI1_HUMANProteinHEXIM1	HEXI1_HUMANProteinHEXIM1	HEXI1_HUMANProteinHEXIM1	MULTI-MSMS	FU20160819-04	590.521	5	590.119	2945.56	77205.2	2.9881	0.0017634	0.04339	2.5605e-05	3.0315	0.001789	590.32	95.791	0.048805	95.791	95.773	95.822	0					9	5	3	0	0	0	0.0071319	1	58267	51.31
	ELELELDRLRAENLQLLTENELHR	24	Unmodified	_ELELELDRLRAENLQLLTENELHR_					0	0	0	2	HEXI1_HUMANProteinHEXIM1	HEXI1_HUMANProteinHEXIM1	HEXI1_HUMANProteinHEXIM1	MULTI-MSMS	FU20160819-04	737.65	4	737.397	2945.56	70250.6	2.6315	0.0019405	0.12694	9.3604e-05	2.7584	0.0020341	737.648	96.141	0.16016	96.141	96.038	96.199	0					18	14	2	0	0	0	4.8665e-07	1	58532	87.156
	ELELELDRLRAENLQLLTENELHR	24	Unmodified	_ELELELDRLRAENLQLLTENELHR_					0	0	0	2	HEXI1_HUMANProteinHEXIM1	HEXI1_HUMANProteinHEXIM1	HEXI1_HUMANProteinHEXIM1	MULTI-MSMS	FU20160819-04	737.65	4	737.397	2945.56	72924.1	2.0162	0.0014867	0.91187	0.00067241	2.9281	0.0021591	737.648	119.02	0.07962	119.02	118.98	119.05	0					14	10	2	0	0	0	0.0042666	1	77391	58.366
	ELELELDRLRAENLQLLTENELHR	24	Unmodified	_ELELELDRLRAENLQLLTENELHR_					0	0	0	2	HEXI1_HUMANProteinHEXIM1	HEXI1_HUMANProteinHEXIM1	HEXI1_HUMANProteinHEXIM1	MULTI-MSMS	FU20160819-04	737.399	4	737.397	2945.56	73986.4	2.0403	0.0015045	1.088	0.00080231	3.1283	0.0023068	737.648	119.27	0.15739	119.27	119.21	119.37	-7.6294e-06					38	21	3	0	0	0	0.019296	1	77505	47.472
	ELELELDRLRAENLQLLTENELHR	24	Unmodified	_ELELELDRLRAENLQLLTENELHR_					0	0	0	2	HEXI1_HUMANProteinHEXIM1	HEXI1_HUMANProteinHEXIM1	HEXI1_HUMANProteinHEXIM1	MULTI-SECPEP	FU20160819-04	590.521	5	590.119	2945.56	75698.3	2.6317	0.001553	1.8406	0.0010862	4.4723	0.0026392	590.321	93.262	0.28648	93.262	93.132	93.418	0					57	25	7	0	0	0	0.00033335	1	55851	63.706
	ELELELDRLRAENLQLLTENELHR	24	Unmodified	_ELELELDRLRAENLQLLTENELHR_					0	0	0	2	HEXI1_HUMANProteinHEXIM1	HEXI1_HUMANProteinHEXIM1	HEXI1_HUMANProteinHEXIM1	MULTI-SECPEP	FU20160819-04	590.118	5	590.119	2945.56	75709.1	2.86	0.0016877	-0.12903	-7.6142e-05	2.7309	0.0016116	590.32	95.403	0.073402	95.403	95.359	95.432	0					15	7	3	0	0	0	4.8575e-05	1	57894	70.072
	ELELELDRLRAENLQLLTENELHR	24	Unmodified	_ELELELDRLRAENLQLLTENELHR_					0	0	0	2	HEXI1_HUMANProteinHEXIM1	HEXI1_HUMANProteinHEXIM1	HEXI1_HUMANProteinHEXIM1	MULTI-SECPEP	FU20160819-04	737.399	4	737.397	2945.56	74777.3	2.0119	0.0014836	0.74269	0.00054765	2.7546	0.0020312	737.898	118.95	0.11478	118.95	118.88	119	0					19	15	2	0	0	0	0.033793	1	77379	54.008
	ELELELDRLRAENLQLLTENELHR	24	Unmodified	_ELELELDRLRAENLQLLTENELHR_					0	0	0	2	HEXI1_HUMANProteinHEXIM1	HEXI1_HUMANProteinHEXIM1	HEXI1_HUMANProteinHEXIM1	MULTI-MSMS	FU20160819-05	737.649	4	737.397	2945.56	69596	3.1662	0.0023348	-0.1076	-7.9346e-05	3.0586	0.0022554	737.647	93.826	0.19598	93.826	93.651	93.847	0					114	19	7	0	0	0	7.2639e-09	1	55683	110.61
	ELELELDRLRAENLQLLTENELHR	24	Unmodified	_ELELELDRLRAENLQLLTENELHR_					0	0	0	2	HEXI1_HUMANProteinHEXIM1	HEXI1_HUMANProteinHEXIM1	HEXI1_HUMANProteinHEXIM1	MULTI-MSMS	FU20160819-05	590.323	5	590.119	2945.56	75352.4	4.1624	0.0024563	0.99757	0.00058868	5.16	0.003045	590.32	93.878	0.24118	93.878	93.847	94.088	0					115	19	9	0	0	0	2.4155e-06	1	55925	75.611
	ELELELDRLRAENLQLLTENELHR	24	Unmodified	_ELELELDRLRAENLQLLTENELHR_					0	0	0	2	HEXI1_HUMANProteinHEXIM1	HEXI1_HUMANProteinHEXIM1	HEXI1_HUMANProteinHEXIM1	MULTI-MSMS	FU20160819-05	737.652	4	737.397	2945.56	69596.1	3.1918	0.0023536	1.7506	0.0012909	4.9424	0.0036445	737.649	93.915	0.24396	93.915	93.83	94.074	0					93	20	7	0	0	0	4.9143e-19	1	56004	123.83
	ELELELDRLRAENLQLLTENELHR	24	Unmodified	_ELELELDRLRAENLQLLTENELHR_					0	0	0	2	HEXI1_HUMANProteinHEXIM1	HEXI1_HUMANProteinHEXIM1	HEXI1_HUMANProteinHEXIM1	MULTI-MSMS	FU20160819-05	737.65	4	737.397	2945.56	69732.5	3.2964	0.0024307	0.18856	0.00013905	3.4849	0.0025698	737.647	94.434	0.23923	94.434	94.377	94.616	0					84	21	8	0	0	0	0.00088223	1	56317	64.522
	ELELELDRLRAENLQLLTENELHR	24	Unmodified	_ELELELDRLRAENLQLLTENELHR_					0	0	0	2	HEXI1_HUMANProteinHEXIM1	HEXI1_HUMANProteinHEXIM1	HEXI1_HUMANProteinHEXIM1	MULTI-MSMS	FU20160819-05	590.321	5	590.119	2945.56	75874.3	4.3032	0.0025394	-0.085472	-5.0439e-05	4.2177	0.002489	590.319	94.659	0.11292	94.659	94.616	94.729	0					46	9	6	0	0	0	0.0068004	1	56524	51.568
	ELELELDRLRAENLQLLTENELHR	24	Unmodified	_ELELELDRLRAENLQLLTENELHR_					0	0	0	2	HEXI1_HUMANProteinHEXIM1	HEXI1_HUMANProteinHEXIM1	HEXI1_HUMANProteinHEXIM1	MULTI-MSMS	FU20160819-05	737.649	4	737.397	2945.56	70333.1	3.3412	0.0024638	0.50531	0.00037262	3.8465	0.0028364	737.648	94.704	0.10546	94.704	94.665	94.77	0					13	8	2	0	0	0	4.9504e-06	1	56621	93.029
	ELELELDRLRAENLQLLTENELHR	24	Unmodified	_ELELELDRLRAENLQLLTENELHR_					0	0	0	2	HEXI1_HUMANProteinHEXIM1	HEXI1_HUMANProteinHEXIM1	HEXI1_HUMANProteinHEXIM1	MULTI-MSMS	FU20160819-05	590.324	5	590.119	2945.56	74568.6	4.2703	0.00252	-0.69428	-0.00040971	3.576	0.0021103	590.318	95.028	0.064209	95.028	94.983	95.047	0					14	6	4	0	0	0	0.0006287	1	56835	64.377
	ELELELDRLRAENLQLLTENELHR	24	Unmodified	_ELELELDRLRAENLQLLTENELHR_					0	0	0	2	HEXI1_HUMANProteinHEXIM1	HEXI1_HUMANProteinHEXIM1	HEXI1_HUMANProteinHEXIM1	MULTI-MSMS	FU20160819-05	737.652	4	737.397	2945.56	69503.6	3.253	0.0023988	1.3685	0.0010092	4.6216	0.0034079	737.648	95.728	0.12241	95.728	95.654	95.776	0					33	10	5	0	0	0	3.7475e-06	1	57468	94.911
	ELELELDRLRAENLQLLTENELHR	24	Unmodified	_ELELELDRLRAENLQLLTENELHR_					0	0	0	2	HEXI1_HUMANProteinHEXIM1	HEXI1_HUMANProteinHEXIM1	HEXI1_HUMANProteinHEXIM1	MULTI-MSMS	FU20160819-05	737.65	4	737.397	2945.56	69745.3	4.6128	0.0034014	-0.18776	-0.00013845	4.425	0.003263	737.897	104.94	0.1188	104.94	104.89	105.01	7.6294e-06					24	10	3	0	0	0	0.03037	1	64763	44.052
	ELELELDRLRAENLQLLTENELHR	24	Unmodified	_ELELELDRLRAENLQLLTENELHR_					0	0	0	2	HEXI1_HUMANProteinHEXIM1	HEXI1_HUMANProteinHEXIM1	HEXI1_HUMANProteinHEXIM1	MULTI-SECPEP	FU20160819-05	983.065	3	982.86	2945.56	58558.3	3.2836	0.0032273	1.7147	0.0016853	4.9983	0.0049126	983.196	93.936	0.2112	93.936	93.781	93.993	0					53	20	7	0	0	0	2.0876e-06	1	55824	83.065
	ELELELDRLRAENLQLLTENELHRQQER	28	Unmodified	_ELELELDRLRAENLQLLTENELHRQQER_					0	0	0	3	HEXI1_HUMANProteinHEXIM1	HEXI1_HUMANProteinHEXIM1	HEXI1_HUMANProteinHEXIM1	MULTI-MSMS	FU20160819-04	698.373	5	698.371	3486.82	71333.5	2.9551	0.0020637	0.72407	0.00050567	3.6791	0.0025694	698.572	87.699	0.2147	87.699	87.629	87.844	0					66	20	6	0	0	0	7.8722e-13	1	50284	75.797
	ELELELDRLRAENLQLLTENELHRQQER	28	Unmodified	_ELELELDRLRAENLQLLTENELHRQQER_					0	0	0	3	HEXI1_HUMANProteinHEXIM1	HEXI1_HUMANProteinHEXIM1	HEXI1_HUMANProteinHEXIM1	MULTI-MSMS	FU20160819-04	698.775	5	698.371	3486.82	71065.7	2.9792	0.0020806	0.10335	7.2178e-05	3.0826	0.0021528	698.772	88.02	0.16715	88.02	87.927	88.095	7.6294e-06					36	15	5	0	0	0	6.3301e-13	1	50632	76.889
	ELELELDRLRAENLQLLTENELHRQQER	28	Unmodified	_ELELELDRLRAENLQLLTENELHRQQER_					0	0	0	3	HEXI1_HUMANProteinHEXIM1	HEXI1_HUMANProteinHEXIM1	HEXI1_HUMANProteinHEXIM1	MULTI-SECPEP	FU20160819-04	582.813	6	582.144	3486.82	74363.7	2.8124	0.0016372	0.5085	0.00029602	3.3209	0.0019332	582.311	87.699	0.10673	87.699	87.66	87.767	0					12	8	2	0	0	0	0.0077374	1	50306	48.255
	ELELELDRLRAENLQLLTENELHRQQER	28	Unmodified	_ELELELDRLRAENLQLLTENELHRQQER_					0	0	0	3	HEXI1_HUMANProteinHEXIM1	HEXI1_HUMANProteinHEXIM1	HEXI1_HUMANProteinHEXIM1	MULTI-SECPEP	FU20160819-04	582.813	6	582.144	3486.82	75553.1	2.8242	0.0016441	-0.13951	-8.1215e-05	2.6847	0.0015629	582.311	87.9	0.36909	87.9	87.66	88.029	0					61	37	7	0	0	0	0.0077374	1	50306	48.255
	ELELELDRLRAENLQLLTENELHRQQER	28	Unmodified	_ELELELDRLRAENLQLLTENELHRQQER_					0	0	0	3	HEXI1_HUMANProteinHEXIM1	HEXI1_HUMANProteinHEXIM1	HEXI1_HUMANProteinHEXIM1	MULTI-MSMS	FU20160819-05	698.372	5	698.371	3486.82	71826.9	3.1141	0.0021748	-0.26548	-0.0001854	2.8486	0.0019894	698.571	88.108	0.39809	88.108	87.892	88.29	0					140	41	6	0	0	0	0.012057	1	50032	39.223
	ELELELDRLRAENLQLLTENELHRQQER	28	Unmodified	_ELELELDRLRAENLQLLTENELHRQQER_					0	0	0	3	HEXI1_HUMANProteinHEXIM1	HEXI1_HUMANProteinHEXIM1	HEXI1_HUMANProteinHEXIM1	MULTI-MSMS	FU20160819-05	698.975	5	698.371	3486.82	71033.1	3.1152	0.0021755	-0.021375	-1.4928e-05	3.0938	0.0021606	698.772	88.232	0.13955	88.232	88.176	88.315	-7.6294e-06					41	14	4	0	0	0	0.0022446	1	50375	49.125
	ELELELDRLRAENLQLLTENELHRQQER	28	Unmodified	_ELELELDRLRAENLQLLTENELHRQQER_					0	0	0	3	HEXI1_HUMANProteinHEXIM1	HEXI1_HUMANProteinHEXIM1	HEXI1_HUMANProteinHEXIM1	MULTI-SECPEP	FU20160819-05	582.146	6	582.144	3486.82	78579.2	2.2976	0.0013375	0.22027	0.00012823	2.5178	0.0014657	582.311	88.103	0.27351	88.103	87.935	88.208	0					60	28	5	0	0	0	0.015587	1	50112	43.175
296	EYLELEK	7	Unmodified	_EYLELEK_					0	0	0	0	HEXI1_HUMANProteinHEXIM1	HEXI1_HUMANProteinHEXIM1	HEXI1_HUMANProteinHEXIM1	MULTI-MSMS	FU20160819-04	462.242	2	462.24	922.465	86978.2	2.9352	0.0013568	-0.2182	-0.00010086	2.717	0.0012559	462.24	43.168	1.8861	43.168	42.556	44.443	-3.8147e-06					1101	254	5	0	0	0	0.013396	5	16707	158.36
	EYLELEK	7	Unmodified	_EYLELEK_					0	0	0	0	HEXI1_HUMANProteinHEXIM1	HEXI1_HUMANProteinHEXIM1	HEXI1_HUMANProteinHEXIM1	MULTI-MSMS	FU20160819-05	462.241	2	462.24	922.465	87746.1	2.5964	0.0012001	0.035266	1.6301e-05	2.6316	0.0012164	462.24	43.275	0.84796	43.275	42.487	43.335	0					354	119	3	0	0	0	0.0084832	2	16324	128.86
	EYLELEK	7	Unmodified	_EYLELEK_					0	0	0	0	HEXI1_HUMANProteinHEXIM1	HEXI1_HUMANProteinHEXIM1	HEXI1_HUMANProteinHEXIM1	MULTI-MSMS	FU20160819-05	462.241	2	462.24	922.465	87746.1	2.6282	0.0012149	0.16723	7.7299e-05	2.7954	0.0012922	462.24	43.918	0.55652	43.918	43.836	44.392	0					115	70	3	0	0	0	0.0052642	2	17050	143.02
	EYLELEKCLSR	11	Unmodified	_EYLELEKCLSR_					0	0	0	1	HEXI1_HUMANProteinHEXIM1	HEXI1_HUMANProteinHEXIM1	HEXI1_HUMANProteinHEXIM1	MULTI-MSMS	FU20160819-07	480.914	3	480.578	1438.71	85006.8	3.0945	0.0014872	-0.45223	-0.00021733	2.6423	0.0012698	480.578	59.19	0.57847	59.19	58.958	59.537	3.8147e-06					195	70	4	0	0	0	0.0028456	1	24725	108.35
	EYLELEKCLSR	11	Unmodified	_EYLELEKCLSR_					0	0	0	1	HEXI1_HUMANProteinHEXIM1	HEXI1_HUMANProteinHEXIM1	HEXI1_HUMANProteinHEXIM1	MULTI-MSMS	FU20160819-07	720.369	2	720.364	1438.71	73473.9	1.5905	0.0011458	1.378	0.00099268	2.9685	0.0021384	720.364	59.195	0.3637	59.195	59.016	59.38	0					102	43	3	0	0	0	1.4539e-42	1	24833	192.44
	EYLELEKCLSR	11	Unmodified	_EYLELEKCLSR_					0	0	0	1	HEXI1_HUMANProteinHEXIM1	HEXI1_HUMANProteinHEXIM1	HEXI1_HUMANProteinHEXIM1	MULTI-MSMS	FU20160819-08	480.914	3	480.578	1438.71	84690.1	2.426	0.0011659	0.16526	7.9418e-05	2.5913	0.0012453	480.578	59.035	0.37165	59.035	58.876	59.247	-3.8147e-06					147	44	4	0	0	0	0.0054073	1	25837	101.39
	EYLELEKCLSR	11	Unmodified	_EYLELEKCLSR_					0	0	0	1	HEXI1_HUMANProteinHEXIM1	HEXI1_HUMANProteinHEXIM1	HEXI1_HUMANProteinHEXIM1	MULTI-MSMS	FU20160819-08	720.368	2	720.364	1438.71	72929.4	2.521	0.0018161	0.36121	0.0002602	2.8822	0.0020763	720.364	59.041	0.35464	59.041	58.9	59.255	0					110	42	4	0	0	0	0.0057079	1	25864	123.51
181	FDEKQSLR	8	Unmodified	_FDEKQSLR_					0	0	0	1	HEXI1_HUMANProteinHEXIM1	HEXI1_HUMANProteinHEXIM1	HEXI1_HUMANProteinHEXIM1	MULTI-MSMS	FU20160819-05	511.768	2	511.767	1021.52	84529.9	2.2473	0.0011501	0.29032	0.00014857	2.5376	0.0012987	511.767	16.825	0.24121	16.825	16.723	16.964	0					67	31	3	0	0	0	0.0027209	1	6156	171.53
	FDEKQSLR	8	Unmodified	_FDEKQSLR_					0	0	0	1	HEXI1_HUMANProteinHEXIM1	HEXI1_HUMANProteinHEXIM1	HEXI1_HUMANProteinHEXIM1	MULTI-MSMS	FU20160819-07	511.769	2	511.767	1021.52	82984.4	3.1983	0.0016368	-0.32053	-0.00016404	2.8778	0.0014727	511.767	16.993	0.76818	16.993	16.885	17.653	0					321	96	5	0	0	0	0.0027209	1	7216	171.53
	FDEKQSLR	8	Unmodified	_FDEKQSLR_					0	0	0	1	HEXI1_HUMANProteinHEXIM1	HEXI1_HUMANProteinHEXIM1	HEXI1_HUMANProteinHEXIM1	MULTI-MSMS	FU20160819-08	511.768	2	511.767	1021.52	83149.8	1.6514	0.00084515	0.70905	0.00036287	2.3605	0.001208	511.767	17.812	0.66622	17.812	17.65	18.316	0					283	86	5	0	0	0	0.0027209	1	7744	171.53
129	GQNGDDSSAGGDFPPPAEVEPTPEAELLAQPCHDSEASK	39	Unmodified	_GQNGDDSSAGGDFPPPAEVEPTPEAELLAQPCHDSEASK_					0	0	0	0	HEXI1_HUMANProteinHEXIM1	HEXI1_HUMANProteinHEXIM1	HEXI1_HUMANProteinHEXIM1	MULTI-MSMS	FU20160819-04	1336.59	3	1336.26	4005.74	52879.4	1.8405	0.0024594	0.32993	0.00044087	2.1704	0.0029002	1336.92	71.767	1.0247	71.767	71.256	72.281	0					749	126	9	0	0	0	8.7431e-29	3	36106	97.077
	GQNGDDSSAGGDFPPPAEVEPTPEAELLAQPCHDSEASK	39	Unmodified	_GQNGDDSSAGGDFPPPAEVEPTPEAELLAQPCHDSEASK_					0	0	0	0	HEXI1_HUMANProteinHEXIM1	HEXI1_HUMANProteinHEXIM1	HEXI1_HUMANProteinHEXIM1	MULTI-MSMS	FU20160819-04	1002.95	4	1002.44	4005.74	60026.5	1.6147	0.0016186	0.66513	0.00066676	2.2798	0.0022854	1002.95	71.78	0.97157	71.78	71.286	72.258	0					686	119	8	0	0	0	3.6195e-16	3	35742	68.25
	GQNGDDSSAGGDFPPPAEVEPTPEAELLAQPCHDSEASK	39	Unmodified	_GQNGDDSSAGGDFPPPAEVEPTPEAELLAQPCHDSEASK_					0	0	0	0	HEXI1_HUMANProteinHEXIM1	HEXI1_HUMANProteinHEXIM1	HEXI1_HUMANProteinHEXIM1	MULTI-MSMS	FU20160819-04	1002.95	4	1002.44	4005.74	60026.5	1.4293	0.0014328	0.58834	0.00058978	2.0176	0.0020226	1002.95	72.627	0.51801	72.627	72.258	72.776	0					119	66	4	0	0	0	0.003863	1	36540	36.77
	GQNGDDSSAGGDFPPPAEVEPTPEAELLAQPCHDSEASK	39	Unmodified	_GQNGDDSSAGGDFPPPAEVEPTPEAELLAQPCHDSEASK_					0	0	0	0	HEXI1_HUMANProteinHEXIM1	HEXI1_HUMANProteinHEXIM1	HEXI1_HUMANProteinHEXIM1	MULTI-MSMS	FU20160819-04	1336.93	3	1336.26	4005.74	52797.4	2.2079	0.0029504	-0.36699	-0.00049039	1.841	0.00246	1336.92	73.19	1.915	73.19	72.409	74.323	0					917	233	8	0	0	0	1.5728e-28	4	37100	95.629
	GQNGDDSSAGGDFPPPAEVEPTPEAELLAQPCHDSEASK	39	Unmodified	_GQNGDDSSAGGDFPPPAEVEPTPEAELLAQPCHDSEASK_					0	0	0	0	HEXI1_HUMANProteinHEXIM1	HEXI1_HUMANProteinHEXIM1	HEXI1_HUMANProteinHEXIM1	MULTI-MSMS	FU20160819-04	1002.7	4	1002.44	4005.74	60019.3	2.0373	0.0020423	0.079687	7.9882e-05	2.117	0.0021222	1002.94	73.202	2.9142	73.202	72.534	75.448	0					812	340	5	0	0	0	1.6179e-10	3	36809	59.566
	GQNGDDSSAGGDFPPPAEVEPTPEAELLAQPCHDSEASK	39	Unmodified	_GQNGDDSSAGGDFPPPAEVEPTPEAELLAQPCHDSEASK_					0	0	0	0	HEXI1_HUMANProteinHEXIM1	HEXI1_HUMANProteinHEXIM1	HEXI1_HUMANProteinHEXIM1	MULTI-SECPEP	FU20160819-04	802.762	5	802.156	4005.74	70707.7	1.8605	0.0014924	1.9767	0.0015856	3.8372	0.003078	802.559	73.079	0.037956	73.079	73.068	73.106	0					7	4	2	0	0	0	0.024548	1	36892	31.16
	GQNGDDSSAGGDFPPPAEVEPTPEAELLAQPCHDSEASK	39	Unmodified	_GQNGDDSSAGGDFPPPAEVEPTPEAELLAQPCHDSEASK_					0	0	0	0	HEXI1_HUMANProteinHEXIM1	HEXI1_HUMANProteinHEXIM1	HEXI1_HUMANProteinHEXIM1	MULTI-MSMS	FU20160819-05	1002.95	4	1002.44	4005.74	59923.5	1.9797	0.0019845	-0.066275	-6.6437e-05	1.9134	0.0019181	1002.94	71.881	1.121	71.881	71.4	72.52	0					688	140	7	0	0	0	3.4024e-22	3	35357	72.539
	GQNGDDSSAGGDFPPPAEVEPTPEAELLAQPCHDSEASK	39	Unmodified	_GQNGDDSSAGGDFPPPAEVEPTPEAELLAQPCHDSEASK_					0	0	0	0	HEXI1_HUMANProteinHEXIM1	HEXI1_HUMANProteinHEXIM1	HEXI1_HUMANProteinHEXIM1	MULTI-MSMS	FU20160819-05	1336.93	3	1336.26	4005.74	52872	1.8055	0.0024127	-0.076771	-0.00010259	1.7288	0.0023101	1336.92	72.007	1.2514	72.007	71.361	72.613	0					829	155	8	0	0	0	4.2818e-39	2	35565	114.72
	GQNGDDSSAGGDFPPPAEVEPTPEAELLAQPCHDSEASK	39	Unmodified	_GQNGDDSSAGGDFPPPAEVEPTPEAELLAQPCHDSEASK_					0	0	0	0	HEXI1_HUMANProteinHEXIM1	HEXI1_HUMANProteinHEXIM1	HEXI1_HUMANProteinHEXIM1	MULTI-MSMS	FU20160819-05	1336.59	3	1336.26	4005.74	52885.8	1.7997	0.0024049	-0.1129	-0.00015086	1.6868	0.0022541	1336.92	72.527	0.27051	72.527	72.35	72.62	0					97	33	4	0	0	0	3.4674e-31	1	35807	99.108
	GQNGDDSSAGGDFPPPAEVEPTPEAELLAQPCHDSEASK	39	Unmodified	_GQNGDDSSAGGDFPPPAEVEPTPEAELLAQPCHDSEASK_					0	0	0	0	HEXI1_HUMANProteinHEXIM1	HEXI1_HUMANProteinHEXIM1	HEXI1_HUMANProteinHEXIM1	MULTI-MSMS	FU20160819-05	1002.95	4	1002.44	4005.74	59818.4	1.9737	0.0019785	-0.40057	-0.00040154	1.5732	0.001577	1002.94	72.441	0.36482	72.441	72.174	72.538	0					212	47	6	0	0	0	2.1756e-05	1	35875	49.155
221	GQPVAPYNTTQFLMDDHDQEEPDLK	25	Unmodified	_GQPVAPYNTTQFLMDDHDQEEPDLK_					0	0	0	0	HEXI1_HUMANProteinHEXIM1	HEXI1_HUMANProteinHEXIM1	HEXI1_HUMANProteinHEXIM1	MULTI-MSMS	FU20160819-04	963.776	3	963.44	2887.3	60940.5	1.809	0.0017428	0.26385	0.00025421	2.0728	0.001997	963.774	72.308	0.73503	72.308	71.799	72.534	0					704	90	9	0	0	0	2.489e-18	2	36279	121.35
	GQPVAPYNTTQFLMDDHDQEEPDLK	25	Unmodified	_GQPVAPYNTTQFLMDDHDQEEPDLK_					0	0	0	0	HEXI1_HUMANProteinHEXIM1	HEXI1_HUMANProteinHEXIM1	HEXI1_HUMANProteinHEXIM1	MULTI-MSMS	FU20160819-04	723.335	4	722.832	2887.3	71565.9	2.5354	0.0018327	0.68585	0.00049576	3.2213	0.0023284	723.333	72.369	0.64082	72.369	71.901	72.542	0					111	79	2	0	0	0	1.1033e-09	2	36444	99.11
	GQPVAPYNTTQFLMDDHDQEEPDLK	25	Unmodified	_GQPVAPYNTTQFLMDDHDQEEPDLK_					0	0	0	0	HEXI1_HUMANProteinHEXIM1	HEXI1_HUMANProteinHEXIM1	HEXI1_HUMANProteinHEXIM1	MULTI-MSMS	FU20160819-04	963.776	3	963.44	2887.3	60940.5	2.2371	0.0021553	-0.11748	-0.00011319	2.1196	0.0020421	963.774	72.634	3.3057	72.634	72.512	75.818	0					2564	378	9	0	0	0	3.8463e-29	10	36760	131.82
	GQPVAPYNTTQFLMDDHDQEEPDLK	25	Unmodified	_GQPVAPYNTTQFLMDDHDQEEPDLK_					0	0	0	0	HEXI1_HUMANProteinHEXIM1	HEXI1_HUMANProteinHEXIM1	HEXI1_HUMANProteinHEXIM1	MULTI-MSMS	FU20160819-04	1445.16	2	1444.66	2887.3	51496.8	1.7089	0.0024687	0.51138	0.00073877	2.2202	0.0032075	1445.16	72.691	0.5041	72.691	72.399	72.903	0					241	63	6	0	0	0	3.3464e-10	1	36524	108.34
	GQPVAPYNTTQFLMDDHDQEEPDLK	25	Unmodified	_GQPVAPYNTTQFLMDDHDQEEPDLK_					0	0	0	0	HEXI1_HUMANProteinHEXIM1	HEXI1_HUMANProteinHEXIM1	HEXI1_HUMANProteinHEXIM1	MULTI-MSMS	FU20160819-04	1445.16	2	1444.66	2887.3	51451.9	1.9785	0.0028583	0.16471	0.00023795	2.1432	0.0030962	1445.16	72.999	0.55907	72.999	72.834	73.393	0					136	72	5	0	0	0	1.2517e-09	1	36779	98.508
	GQPVAPYNTTQFLMDDHDQEEPDLK	25	Unmodified	_GQPVAPYNTTQFLMDDHDQEEPDLK_					0	0	0	0	HEXI1_HUMANProteinHEXIM1	HEXI1_HUMANProteinHEXIM1	HEXI1_HUMANProteinHEXIM1	MULTI-MSMS	FU20160819-04	723.335	4	722.832	2887.3	71496.3	2.8095	0.0020308	0.47847	0.00034585	3.288	0.0023766	723.083	72.671	1.1731	72.671	72.534	73.707	7.6294e-06					307	148	3	0	0	0	2.9025e-18	3	36962	120.32
	GQPVAPYNTTQFLMDDHDQEEPDLK	25	Unmodified	_GQPVAPYNTTQFLMDDHDQEEPDLK_					0	0	0	0	HEXI1_HUMANProteinHEXIM1	HEXI1_HUMANProteinHEXIM1	HEXI1_HUMANProteinHEXIM1	MULTI-MSMS	FU20160819-04	1445.16	2	1444.66	2887.3	51541.7	2.2308	0.0032228	0.29897	0.00043191	2.5298	0.0036547	1445.16	73.161	0.72945	73.161	73.001	73.73	0					227	90	3	0	0	0	2.6831e-11	1	37047	115.58
	GQPVAPYNTTQFLMDDHDQEEPDLK	25	Unmodified	_GQPVAPYNTTQFLMDDHDQEEPDLK_					0	0	0	0	HEXI1_HUMANProteinHEXIM1	HEXI1_HUMANProteinHEXIM1	HEXI1_HUMANProteinHEXIM1	MULTI-MSMS	FU20160819-04	963.776	3	963.44	2887.3	68746.1	3.595	0.0034636	-1.7161	-0.0016533	1.8789	0.0018103	964.106	101.17	0.073402	101.17	101.14	101.21	0					12	8	2	0	0	0	0.024716	1	63285	44.632
	GQPVAPYNTTQFLMDDHDQEEPDLK	25	Unmodified	_GQPVAPYNTTQFLMDDHDQEEPDLK_					0	0	0	0	HEXI1_HUMANProteinHEXIM1	HEXI1_HUMANProteinHEXIM1	HEXI1_HUMANProteinHEXIM1	MULTI-MSMS	FU20160819-04	963.777	3	963.44	2887.3	65687.8	3.7512	0.003614	-0.71472	-0.00068859	3.0365	0.0029255	963.773	102.82	0.29582	102.82	102.7	102.99	0					34	29	2	0	0	0	0.034631	1	64801	42.322
	GQPVAPYNTTQFLMDDHDQEEPDLK	25	Unmodified	_GQPVAPYNTTQFLMDDHDQEEPDLK_					0	0	0	0	HEXI1_HUMANProteinHEXIM1	HEXI1_HUMANProteinHEXIM1	HEXI1_HUMANProteinHEXIM1	MSMS	FU20160819-04	963.442	3	963.44	2887.3	NaN	NaN	NaN	NaN	NaN	NaN	NaN	NaN	76.27	1	76.27	75.77	76.77	0								0	0	0	3.1486e-08	1	39873	107.56
	GQPVAPYNTTQFLMDDHDQEEPDLK	25	Unmodified	_GQPVAPYNTTQFLMDDHDQEEPDLK_					0	0	0	0	HEXI1_HUMANProteinHEXIM1	HEXI1_HUMANProteinHEXIM1	HEXI1_HUMANProteinHEXIM1	MSMS	FU20160819-04	963.442	3	963.44	2887.3	NaN	NaN	NaN	NaN	NaN	NaN	NaN	NaN	76.704	1	76.704	76.204	77.204	0								0	0	0	3.1619e-08	1	40179	107.56
	GQPVAPYNTTQFLMDDHDQEEPDLK	25	Unmodified	_GQPVAPYNTTQFLMDDHDQEEPDLK_					0	0	0	0	HEXI1_HUMANProteinHEXIM1	HEXI1_HUMANProteinHEXIM1	HEXI1_HUMANProteinHEXIM1	MSMS	FU20160819-04	963.439	3	963.44	2887.3	NaN	NaN	NaN	NaN	NaN	NaN	NaN	NaN	77.69	1	77.69	77.19	78.19	0								0	0	0	0.027559	1	41081	59.356
	GQPVAPYNTTQFLMDDHDQEEPDLK	25	Unmodified	_GQPVAPYNTTQFLMDDHDQEEPDLK_					0	0	0	0	HEXI1_HUMANProteinHEXIM1	HEXI1_HUMANProteinHEXIM1	HEXI1_HUMANProteinHEXIM1	MULTI-SECPEP	FU20160819-04	963.777	3	963.44	2887.3	62815.9	2.0873	0.0020109	-0.59292	-0.00057124	1.4943	0.0014397	963.774	77.38	0.51287	77.38	76.988	77.501	0					129	48	5	0	0	0	9.9155e-08	1	40527	82.593
	GQPVAPYNTTQFLMDDHDQEEPDLK	25	Unmodified	_GQPVAPYNTTQFLMDDHDQEEPDLK_					0	0	0	0	HEXI1_HUMANProteinHEXIM1	HEXI1_HUMANProteinHEXIM1	HEXI1_HUMANProteinHEXIM1	MULTI-MSMS	FU20160819-05	963.776	3	963.44	2887.3	61236.4	1.723	0.00166	0.091677	8.8326e-05	1.8147	0.0017484	963.774	72.515	3.1796	72.515	71.951	75.131	7.6294e-06					2482	378	7	0	0	0	1.6663e-30	9	35813	141.79
	GQPVAPYNTTQFLMDDHDQEEPDLK	25	Unmodified	_GQPVAPYNTTQFLMDDHDQEEPDLK_					0	0	0	0	HEXI1_HUMANProteinHEXIM1	HEXI1_HUMANProteinHEXIM1	HEXI1_HUMANProteinHEXIM1	MULTI-MSMS	FU20160819-05	723.085	4	722.832	2887.3	70896.4	2.6965	0.0019491	0.17901	0.0001294	2.8755	0.0020785	723.333	72.471	0.87305	72.471	72.064	72.937	7.6294e-06					177	109	3	0	0	0	4.8858e-12	1	35612	110.33
	GQPVAPYNTTQFLMDDHDQEEPDLK	25	Unmodified	_GQPVAPYNTTQFLMDDHDQEEPDLK_					0	0	0	0	HEXI1_HUMANProteinHEXIM1	HEXI1_HUMANProteinHEXIM1	HEXI1_HUMANProteinHEXIM1	MULTI-MSMS	FU20160819-05	1445.66	2	1444.66	2887.3	51408.4	1.6858	0.0024354	0.28941	0.0004181	1.9752	0.0028535	1445.16	72.514	0.25583	72.514	72.372	72.627	0					138	31	8	0	0	0	4.3446e-08	2	35814	113.14
	GQPVAPYNTTQFLMDDHDQEEPDLK	25	Unmodified	_GQPVAPYNTTQFLMDDHDQEEPDLK_					0	0	0	0	HEXI1_HUMANProteinHEXIM1	HEXI1_HUMANProteinHEXIM1	HEXI1_HUMANProteinHEXIM1	MULTI-MSMS	FU20160819-05	1445.16	2	1444.66	2887.3	51296.3	1.7565	0.0025375	0.3305	0.00047746	2.087	0.003015	1445.16	72.759	1.408	72.759	72.613	74.021	0					433	171	6	0	0	0	2.5124e-11	1	36054	111.78
	GQPVAPYNTTQFLMDDHDQEEPDLK	25	Unmodified	_GQPVAPYNTTQFLMDDHDQEEPDLK_					0	0	0	0	HEXI1_HUMANProteinHEXIM1	HEXI1_HUMANProteinHEXIM1	HEXI1_HUMANProteinHEXIM1	MULTI-MSMS	FU20160819-05	722.833	4	722.832	2887.3	70975	3.0357	0.0021943	-0.56279	-0.0004068	2.4729	0.0017875	723.333	74.152	0.27834	74.152	74.073	74.351	-7.6294e-06					54	31	3	0	0	0	2.6834e-10	2	37338	103.71
	GQPVAPYNTTQFLMDDHDQEEPDLK	25	Unmodified	_GQPVAPYNTTQFLMDDHDQEEPDLK_					0	0	0	0	HEXI1_HUMANProteinHEXIM1	HEXI1_HUMANProteinHEXIM1	HEXI1_HUMANProteinHEXIM1	MULTI-MSMS	FU20160819-05	963.774	3	963.44	2887.3	61511.2	1.9024	0.0018328	-0.38789	-0.00037371	1.5145	0.0014591	963.774	75.222	0.89288	75.222	75.131	76.024	0					346	86	6	0	0	0	2.5407e-18	3	38925	121.33
	GQPVAPYNTTQFLMDDHDQEEPDLK	25	Unmodified	_GQPVAPYNTTQFLMDDHDQEEPDLK_					0	0	0	0	HEXI1_HUMANProteinHEXIM1	HEXI1_HUMANProteinHEXIM1	HEXI1_HUMANProteinHEXIM1	MULTI-MSMS	FU20160819-05	964.108	3	963.44	2887.3	62873.2	1.7756	0.0017107	-1.5102	-0.001455	0.26539	0.00025568	963.774	76.572	0.19827	76.572	76.472	76.671	0					73	25	5	0	0	0	0.00019375	1	39471	66.31
	GQPVAPYNTTQFLMDDHDQEEPDLK	25	Unmodified	_GQPVAPYNTTQFLMDDHDQEEPDLK_					0	0	0	0	HEXI1_HUMANProteinHEXIM1	HEXI1_HUMANProteinHEXIM1	HEXI1_HUMANProteinHEXIM1	MULTI-MSMS	FU20160819-05	963.442	3	963.44	2887.3	62321.4	1.7548	0.0016907	-0.00055676	-5.364e-07	1.7543	0.0016901	963.774	76.748	0.30692	76.748	76.587	76.894	-7.6294e-06					107	39	4	0	0	0	0.0001194	1	39600	67.552
	GQPVAPYNTTQFLMDDHDQEEPDLK	25	Unmodified	_GQPVAPYNTTQFLMDDHDQEEPDLK_					0	0	0	0	HEXI1_HUMANProteinHEXIM1	HEXI1_HUMANProteinHEXIM1	HEXI1_HUMANProteinHEXIM1	MULTI-MSMS	FU20160819-05	963.774	3	963.44	2887.3	63366.6	1.722	0.001659	-0.28827	-0.00027773	1.4337	0.0013813	964.108	77.044	0.34776	77.044	76.887	77.235	-7.6294e-06					104	42	4	0	0	0	1.7581e-09	2	39852	99.064
	GQPVAPYNTTQFLMDDHDQEEPDLK	25	Unmodified	_GQPVAPYNTTQFLMDDHDQEEPDLK_					0	0	0	0	HEXI1_HUMANProteinHEXIM1	HEXI1_HUMANProteinHEXIM1	HEXI1_HUMANProteinHEXIM1	MULTI-MSMS	FU20160819-05	963.775	3	963.44	2887.3	62177.2	1.4423	0.0013895	0.31696	0.00030537	1.7592	0.0016949	963.775	83.788	0.18322	83.788	83.758	83.942	0					40	19	3	0	0	0	4.666e-08	2	45742	75.3
	GQPVAPYNTTQFLMDDHDQEEPDLK	25	Unmodified	_GQPVAPYNTTQFLMDDHDQEEPDLK_					0	0	0	0	HEXI1_HUMANProteinHEXIM1	HEXI1_HUMANProteinHEXIM1	HEXI1_HUMANProteinHEXIM1	MULTI-MSMS	FU20160819-05	963.775	3	963.44	2887.3	63345.7	2.7553	0.0026545	-0.30662	-0.00029541	2.4486	0.0023591	964.108	92.02	0.17393	92.02	91.965	92.139	0					33	15	3	0	0	0	0.00097628	1	54299	62.193
	GQPVAPYNTTQFLMDDHDQEEPDLK	25	Unmodified	_GQPVAPYNTTQFLMDDHDQEEPDLK_					0	0	0	0	HEXI1_HUMANProteinHEXIM1	HEXI1_HUMANProteinHEXIM1	HEXI1_HUMANProteinHEXIM1	MULTI-SECPEP	FU20160819-05	1445.16	2	1444.66	2887.3	51408.4	2.0305	0.0029334	0.37759	0.00054549	2.4081	0.0034789	1445.66	74.182	0.18466	74.182	74.129	74.313	0					25	20	3	0	0	0	0.004176	1	37241	62.377
	GQPVAPYNTTQFLMDDHDQEEPDLK	25	Unmodified	_GQPVAPYNTTQFLMDDHDQEEPDLK_					0	0	0	0	HEXI1_HUMANProteinHEXIM1	HEXI1_HUMANProteinHEXIM1	HEXI1_HUMANProteinHEXIM1	MULTI-MSMS	FU20160819-07	964.11	3	963.44	2887.3	NaN	3.1186	0.0030046	1.6514	0.0015911	4.77	0.0045957	963.776	72.026	0.045052	72.026	72	72.045	0					6	5	2	0	0	0	0.017562	1	34246	47.058
	GQPVAPYNTTQFLMDDHDQEEPDLK	25	Unmodified	_GQPVAPYNTTQFLMDDHDQEEPDLK_					0	0	0	0	HEXI1_HUMANProteinHEXIM1	HEXI1_HUMANProteinHEXIM1	HEXI1_HUMANProteinHEXIM1	MULTI-MSMS	FU20160819-07	963.776	3	963.44	2887.3	61245.7	3.2809	0.0031609	-1.0949	-0.0010549	2.186	0.0021061	963.773	72.397	0.48244	72.397	72.107	72.589	0					266	57	7	0	0	0	2.956e-29	1	34474	137.43
	GQPVAPYNTTQFLMDDHDQEEPDLK	25	Unmodified	_GQPVAPYNTTQFLMDDHDQEEPDLK_					0	0	0	0	HEXI1_HUMANProteinHEXIM1	HEXI1_HUMANProteinHEXIM1	HEXI1_HUMANProteinHEXIM1	MULTI-MSMS	FU20160819-07	963.776	3	963.44	2887.3	61120.8	3.4243	0.0032991	-1.2984	-0.0012509	2.126	0.0020482	963.773	72.627	1.067	72.627	72.49	73.557	0					386	124	6	0	0	0	3.9503e-24	2	34971	123.14
	GQPVAPYNTTQFLMDDHDQEEPDLK	25	Unmodified	_GQPVAPYNTTQFLMDDHDQEEPDLK_					0	0	0	0	HEXI1_HUMANProteinHEXIM1	HEXI1_HUMANProteinHEXIM1	HEXI1_HUMANProteinHEXIM1	MSMS	FU20160819-07	1444.66	2	1444.66	2887.3	NaN	NaN	NaN	NaN	NaN	NaN	NaN	NaN	72.423	1	72.423	71.923	72.923	0								0	0	0	9.9341e-08	1	34487	92.38
	GQPVAPYNTTQFLMDDHDQEEPDLK	25	Unmodified	_GQPVAPYNTTQFLMDDHDQEEPDLK_					0	0	0	0	HEXI1_HUMANProteinHEXIM1	HEXI1_HUMANProteinHEXIM1	HEXI1_HUMANProteinHEXIM1	MULTI-SECPEP	FU20160819-07	964.105	3	963.44	2887.3	61805.7	3.893	0.0037507	-2.128	-0.0020502	1.765	0.0017005	963.772	73.689	0.43827	73.689	73.557	73.995	0					89	44	4	0	0	0	0.00010376	1	35711	68.705
	GQPVAPYNTTQFLMDDHDQEEPDLK	25	Unmodified	_GQPVAPYNTTQFLMDDHDQEEPDLK_					0	0	0	0	HEXI1_HUMANProteinHEXIM1	HEXI1_HUMANProteinHEXIM1	HEXI1_HUMANProteinHEXIM1	MULTI-MSMS	FU20160819-08	963.776	3	963.44	2887.3	61770.8	3.4525	0.0033262	-1.3109	-0.001263	2.1416	0.0020633	963.773	72.729	0.88882	72.729	72.476	73.365	7.6294e-06					412	105	8	0	0	0	5.4718e-10	2	35903	103.28
	GQPVAPYNTTQFLMDDHDQEEPDLK	25	Unmodified	_GQPVAPYNTTQFLMDDHDQEEPDLK_					0	0	0	0	HEXI1_HUMANProteinHEXIM1	HEXI1_HUMANProteinHEXIM1	HEXI1_HUMANProteinHEXIM1	MULTI-MSMS	FU20160819-08	722.836	4	722.832	2887.3	NaN	2.8704	0.0020748	1.0692	0.00077289	3.9397	0.0028477	723.334	72.987	0.03566	72.987	72.968	73.004	0					5	3	2	0	0	0	2.214e-08	1	36090	92.289
	GQPVAPYNTTQFLMDDHDQEEPDLK	25	Unmodified	_GQPVAPYNTTQFLMDDHDQEEPDLK_					0	0	0	0	HEXI1_HUMANProteinHEXIM1	HEXI1_HUMANProteinHEXIM1	HEXI1_HUMANProteinHEXIM1	MULTI-MSMS	FU20160819-08	963.776	3	963.44	2887.3	61805.3	3.5185	0.0033899	-1.6679	-0.001607	1.8506	0.0017829	964.107	73.262	0.22983	73.262	73.242	73.472	0					63	27	3	0	0	0	9.5219e-09	1	36403	83.064
	GQPVAPYNTTQFLMDDHDQEEPDLK	25	Unmodified	_GQPVAPYNTTQFLMDDHDQEEPDLK_					0	0	0	0	HEXI1_HUMANProteinHEXIM1	HEXI1_HUMANProteinHEXIM1	HEXI1_HUMANProteinHEXIM1	MULTI-MSMS	FU20160819-08	963.774	3	963.44	2887.3	62358.3	3.5509	0.0034211	-2.8145	-0.0027116	0.73635	0.00070943	963.771	73.59	0.46835	73.59	73.444	73.912	0					144	47	5	0	0	0	5.3124e-11	1	36705	107.83
221227	GQPVAPYNTTQFLMDDHDQEEPDLKTGLYSK	31	Unmodified	_GQPVAPYNTTQFLMDDHDQEEPDLKTGLYSK_					0	0	0	1	HEXI1_HUMANProteinHEXIM1	HEXI1_HUMANProteinHEXIM1	HEXI1_HUMANProteinHEXIM1	MULTI-MSMS	FU20160819-04	885.419	4	885.167	3536.64	63685	3.6903	0.0032665	-1.0567	-0.00093534	2.6336	0.0023312	885.668	74.895	0.30686	74.895	74.712	75.019	0					42	30	2	0	0	0	0.01776	1	38493	37.424
	GQPVAPYNTTQFLMDDHDQEEPDLKTGLYSK	31	Unmodified	_GQPVAPYNTTQFLMDDHDQEEPDLKTGLYSK_					0	0	0	1	HEXI1_HUMANProteinHEXIM1	HEXI1_HUMANProteinHEXIM1	HEXI1_HUMANProteinHEXIM1	MULTI-MSMS	FU20160819-04	885.421	4	885.167	3536.64	63078.3	2.8732	0.0025432	-0.45857	-0.00040591	2.4146	0.0021373	885.418	76.068	0.81863	76.068	75.329	76.147	0					505	82	10	0	0	0	9.114e-19	3	39760	89.029
	GQPVAPYNTTQFLMDDHDQEEPDLKTGLYSK	31	Unmodified	_GQPVAPYNTTQFLMDDHDQEEPDLKTGLYSK_					0	0	0	1	HEXI1_HUMANProteinHEXIM1	HEXI1_HUMANProteinHEXIM1	HEXI1_HUMANProteinHEXIM1	MULTI-MSMS	FU20160819-04	1180.89	3	1179.89	3536.64	56421.5	2.2337	0.0026356	0.086823	0.00010244	2.3206	0.002738	1180.22	76.067	0.54121	76.067	75.553	76.094	0					294	51	9	0	0	0	0.00050499	2	39401	52.556
	GQPVAPYNTTQFLMDDHDQEEPDLKTGLYSK	31	Unmodified	_GQPVAPYNTTQFLMDDHDQEEPDLKTGLYSK_					0	0	0	1	HEXI1_HUMANProteinHEXIM1	HEXI1_HUMANProteinHEXIM1	HEXI1_HUMANProteinHEXIM1	MULTI-MSMS	FU20160819-04	708.539	5	708.335	3536.64	72040.2	2.5541	0.0018092	0.73202	0.00051852	3.2862	0.0023277	708.537	76.128	0.30534	76.128	75.864	76.17	0					42	32	2	0	0	0	1.1478e-05	1	39628	59.536
	GQPVAPYNTTQFLMDDHDQEEPDLKTGLYSK	31	Unmodified	_GQPVAPYNTTQFLMDDHDQEEPDLKTGLYSK_					0	0	0	1	HEXI1_HUMANProteinHEXIM1	HEXI1_HUMANProteinHEXIM1	HEXI1_HUMANProteinHEXIM1	MULTI-MSMS	FU20160819-04	1180.56	3	1179.89	3536.64	56291.8	2.1289	0.0025119	0.22234	0.00026234	2.3513	0.0027743	1180.22	76.389	0.37345	76.389	76.337	76.711	0					90	47	3	0	0	0	1.3216e-19	1	39985	80.984
	GQPVAPYNTTQFLMDDHDQEEPDLKTGLYSK	31	Unmodified	_GQPVAPYNTTQFLMDDHDQEEPDLKTGLYSK_					0	0	0	1	HEXI1_HUMANProteinHEXIM1	HEXI1_HUMANProteinHEXIM1	HEXI1_HUMANProteinHEXIM1	MULTI-MSMS	FU20160819-04	1180.22	3	1179.89	3536.64	56291.8	2.0617	0.0024326	0.19381	0.00022867	2.2555	0.0026613	1180.22	76.774	0.58701	76.774	76.516	77.103	0					149	67	3	0	0	0	9.8508e-24	2	40220	104.83
	GQPVAPYNTTQFLMDDHDQEEPDLKTGLYSK	31	Unmodified	_GQPVAPYNTTQFLMDDHDQEEPDLKTGLYSK_					0	0	0	1	HEXI1_HUMANProteinHEXIM1	HEXI1_HUMANProteinHEXIM1	HEXI1_HUMANProteinHEXIM1	MULTI-MSMS	FU20160819-04	885.671	4	885.167	3536.64	63078.3	2.6761	0.0023688	-0.46837	-0.00041458	2.2077	0.0019542	885.668	76.773	0.91745	76.773	76.699	77.617	0					593	95	8	0	0	0	9.114e-19	3	40541	89.029
	GQPVAPYNTTQFLMDDHDQEEPDLKTGLYSK	31	Unmodified	_GQPVAPYNTTQFLMDDHDQEEPDLKTGLYSK_					0	0	0	1	HEXI1_HUMANProteinHEXIM1	HEXI1_HUMANProteinHEXIM1	HEXI1_HUMANProteinHEXIM1	MULTI-MSMS	FU20160819-04	1180.56	3	1179.89	3536.64	56138.5	1.9549	0.0023066	-1.2675	-0.0014955	0.68741	0.00081106	1180.22	77.436	0.15091	77.436	77.389	77.54	0					41	13	6	0	0	0	1.0271e-18	1	40886	88.481
	GQPVAPYNTTQFLMDDHDQEEPDLKTGLYSK	31	Unmodified	_GQPVAPYNTTQFLMDDHDQEEPDLKTGLYSK_					0	0	0	1	HEXI1_HUMANProteinHEXIM1	HEXI1_HUMANProteinHEXIM1	HEXI1_HUMANProteinHEXIM1	MULTI-MSMS	FU20160819-04	1180.56	3	1179.89	3536.64	56094.9	1.8844	0.0022234	-1.0784	-0.0012724	0.806	0.00095099	1180.55	77.831	0.17725	77.831	77.756	77.933	0					30	21	2	0	0	0	4.7098e-14	1	41153	69.576
	GQPVAPYNTTQFLMDDHDQEEPDLKTGLYSK	31	Unmodified	_GQPVAPYNTTQFLMDDHDQEEPDLKTGLYSK_					0	0	0	1	HEXI1_HUMANProteinHEXIM1	HEXI1_HUMANProteinHEXIM1	HEXI1_HUMANProteinHEXIM1	MULTI-MSMS	FU20160819-04	1180.56	3	1179.89	3536.64	59103.3	1.8288	0.0021578	-0.39369	-0.00046452	1.4351	0.0016933	1180.56	78.147	0.056862	78.147	78.109	78.166	0					9	6	2	0	0	0	0.0071543	1	41380	43.622
	GQPVAPYNTTQFLMDDHDQEEPDLKTGLYSK	31	Unmodified	_GQPVAPYNTTQFLMDDHDQEEPDLKTGLYSK_					0	0	0	1	HEXI1_HUMANProteinHEXIM1	HEXI1_HUMANProteinHEXIM1	HEXI1_HUMANProteinHEXIM1	MULTI-MSMS	FU20160819-04	885.671	4	885.167	3536.64	63978.3	2.4049	0.0021288	0.050656	4.4839e-05	2.4556	0.0021736	885.669	78.429	0.33431	78.429	78.28	78.614	0					113	42	5	0	0	0	7.0599e-19	2	41545	90.268
	GQPVAPYNTTQFLMDDHDQEEPDLKTGLYSK	31	Unmodified	_GQPVAPYNTTQFLMDDHDQEEPDLKTGLYSK_					0	0	0	1	HEXI1_HUMANProteinHEXIM1	HEXI1_HUMANProteinHEXIM1	HEXI1_HUMANProteinHEXIM1	MULTI-MSMS	FU20160819-04	885.419	4	885.167	3536.64	64039.5	2.2963	0.0020326	0.25342	0.00022432	2.5497	0.0022569	885.669	79.012	0.29579	79.012	78.813	79.109	0					77	38	4	0	0	0	1.8858e-19	2	41960	94.588
	GQPVAPYNTTQFLMDDHDQEEPDLKTGLYSK	31	Unmodified	_GQPVAPYNTTQFLMDDHDQEEPDLKTGLYSK_					0	0	0	1	HEXI1_HUMANProteinHEXIM1	HEXI1_HUMANProteinHEXIM1	HEXI1_HUMANProteinHEXIM1	MULTI-MSMS	FU20160819-04	885.172	4	885.167	3536.64	63978.3	2.2304	0.0019743	0.15611	0.00013818	2.3865	0.0021125	885.418	79.297	0.36699	79.297	79.177	79.544	0					84	47	3	0	0	0	6.0681e-24	1	42083	107.01
	GQPVAPYNTTQFLMDDHDQEEPDLKTGLYSK	31	Unmodified	_GQPVAPYNTTQFLMDDHDQEEPDLKTGLYSK_					0	0	0	1	HEXI1_HUMANProteinHEXIM1	HEXI1_HUMANProteinHEXIM1	HEXI1_HUMANProteinHEXIM1	MULTI-MSMS	FU20160819-04	885.922	4	885.167	3536.64	65163.8	1.9879	0.0017596	0.70221	0.00062157	2.6901	0.0023812	885.419	80.383	0.58868	80.383	80.244	80.832	0					119	59	4	0	0	0	5.3436e-07	1	43049	62.108
	GQPVAPYNTTQFLMDDHDQEEPDLKTGLYSK	31	Unmodified	_GQPVAPYNTTQFLMDDHDQEEPDLKTGLYSK_					0	0	0	1	HEXI1_HUMANProteinHEXIM1	HEXI1_HUMANProteinHEXIM1	HEXI1_HUMANProteinHEXIM1	MULTI-MSMS	FU20160819-04	885.422	4	885.167	3536.64	63653.8	1.7224	0.0015246	1.9324	0.0017105	3.6547	0.0032351	885.671	81.692	0.055634	81.692	81.65	81.706	0					9	6	3	0	0	0	0.005952	1	44282	44.6
	GQPVAPYNTTQFLMDDHDQEEPDLKTGLYSK	31	Unmodified	_GQPVAPYNTTQFLMDDHDQEEPDLKTGLYSK_					0	0	0	1	HEXI1_HUMANProteinHEXIM1	HEXI1_HUMANProteinHEXIM1	HEXI1_HUMANProteinHEXIM1	MULTI-MSMS	FU20160819-04	885.921	4	885.167	3536.64	68195.8	1.5838	0.001402	1.172	0.0010374	2.7558	0.0024394	885.67	82.351	0.21203	82.351	82.224	82.436	7.6294e-06					30	24	3	0	0	0	0.00027876	1	44880	54.675
	GQPVAPYNTTQFLMDDHDQEEPDLKTGLYSK	31	Unmodified	_GQPVAPYNTTQFLMDDHDQEEPDLKTGLYSK_					0	0	0	1	HEXI1_HUMANProteinHEXIM1	HEXI1_HUMANProteinHEXIM1	HEXI1_HUMANProteinHEXIM1	MULTI-MSMS	FU20160819-04	885.921	4	885.167	3536.64	64467.8	3.1956	0.0028286	-0.91673	-0.00081146	2.2789	0.0020172	885.668	86.708	0.35664	86.708	86.587	86.944	0					75	34	4	0	0	0	0.0064115	1	49236	44.164
	GQPVAPYNTTQFLMDDHDQEEPDLKTGLYSK	31	Unmodified	_GQPVAPYNTTQFLMDDHDQEEPDLKTGLYSK_					0	0	0	1	HEXI1_HUMANProteinHEXIM1	HEXI1_HUMANProteinHEXIM1	HEXI1_HUMANProteinHEXIM1	MULTI-MSMS	FU20160819-04	885.675	4	885.167	3536.64	65464.6	2.4433	0.0021628	-0.19785	-0.00017513	2.2455	0.0019876	885.669	90.799	0.62511	90.799	90.443	91.068	0					155	59	6	0	0	0	0.0036109	1	53584	47.376
	GQPVAPYNTTQFLMDDHDQEEPDLKTGLYSK	31	Unmodified	_GQPVAPYNTTQFLMDDHDQEEPDLKTGLYSK_					0	0	0	1	HEXI1_HUMANProteinHEXIM1	HEXI1_HUMANProteinHEXIM1	HEXI1_HUMANProteinHEXIM1	MULTI-MSMS	FU20160819-04	885.42	4	885.167	3536.64	66301.4	2.9286	0.0025923	-0.44584	-0.00039464	2.4828	0.0021977	885.418	94.503	0.26842	94.503	94.445	94.714	0					58	26	3	0	0	0	0.028626	1	56987	33.776
	GQPVAPYNTTQFLMDDHDQEEPDLKTGLYSK	31	Unmodified	_GQPVAPYNTTQFLMDDHDQEEPDLKTGLYSK_					0	0	0	1	HEXI1_HUMANProteinHEXIM1	HEXI1_HUMANProteinHEXIM1	HEXI1_HUMANProteinHEXIM1	MULTI-MSMS	FU20160819-04	885.672	4	885.167	3536.64	66301.4	2.9942	0.0026504	-0.37519	-0.0003321	2.619	0.0023183	885.668	94.773	0.42059	94.773	94.619	95.039	0					65	39	3	0	0	0	0.015462	1	57342	38.196
	GQPVAPYNTTQFLMDDHDQEEPDLKTGLYSK	31	Unmodified	_GQPVAPYNTTQFLMDDHDQEEPDLKTGLYSK_					0	0	0	1	HEXI1_HUMANProteinHEXIM1	HEXI1_HUMANProteinHEXIM1	HEXI1_HUMANProteinHEXIM1	MULTI-MSMS	FU20160819-04	885.421	4	885.167	3536.64	65393.5	3.8655	0.0034216	-1.0075	-0.00089178	2.858	0.0025298	885.668	104.11	0.37785	104.11	103.91	104.29	0					75	40	4	0	0	0	0.021074	1	65970	36.311
	GQPVAPYNTTQFLMDDHDQEEPDLKTGLYSK	31	Unmodified	_GQPVAPYNTTQFLMDDHDQEEPDLKTGLYSK_					0	0	0	1	HEXI1_HUMANProteinHEXIM1	HEXI1_HUMANProteinHEXIM1	HEXI1_HUMANProteinHEXIM1	MULTI-MSMS	FU20160819-04	885.421	4	885.167	3536.64	62965.1	3.6181	0.0032026	-1.0551	-0.00093392	2.563	0.0022687	885.417	112.33	0.22685	112.33	112.26	112.49	0					32	16	4	0	0	0	0.007758	1	73530	42.885
	GQPVAPYNTTQFLMDDHDQEEPDLKTGLYSK	31	Unmodified	_GQPVAPYNTTQFLMDDHDQEEPDLKTGLYSK_					0	0	0	1	HEXI1_HUMANProteinHEXIM1	HEXI1_HUMANProteinHEXIM1	HEXI1_HUMANProteinHEXIM1	MULTI-SECPEP	FU20160819-04	885.671	4	885.167	3536.64	63078.3	2.7932	0.0024725	-0.48544	-0.00042969	2.3078	0.0020428	885.668	76.286	0.57787	76.286	76.005	76.583	0					441	74	10	0	0	0	0.0032709	1	40001	62.052
	GQPVAPYNTTQFLMDDHDQEEPDLKTGLYSK	31	Unmodified	_GQPVAPYNTTQFLMDDHDQEEPDLKTGLYSK_					0	0	0	1	HEXI1_HUMANProteinHEXIM1	HEXI1_HUMANProteinHEXIM1	HEXI1_HUMANProteinHEXIM1	MULTI-SECPEP	FU20160819-04	885.671	4	885.167	3536.64	63078.4	2.7352	0.0024211	-0.30908	-0.00027359	2.4261	0.0021475	885.418	76.531	0.4184	76.531	76.337	76.756	0					214	52	8	0	0	0	0.0032709	1	40001	62.052
	GQPVAPYNTTQFLMDDHDQEEPDLKTGLYSK	31	Unmodified	_GQPVAPYNTTQFLMDDHDQEEPDLKTGLYSK_					0	0	0	1	HEXI1_HUMANProteinHEXIM1	HEXI1_HUMANProteinHEXIM1	HEXI1_HUMANProteinHEXIM1	MULTI-SECPEP	FU20160819-04	885.918	4	885.167	3536.64	63265.7	2.495	0.0022085	-0.46926	-0.00041537	2.0258	0.0017931	885.668	77.936	0.28918	77.936	77.797	78.086	0					121	36	6	0	0	0	0.0036185	1	41174	72.231
	GQPVAPYNTTQFLMDDHDQEEPDLKTGLYSK	31	Unmodified	_GQPVAPYNTTQFLMDDHDQEEPDLKTGLYSK_					0	0	0	1	HEXI1_HUMANProteinHEXIM1	HEXI1_HUMANProteinHEXIM1	HEXI1_HUMANProteinHEXIM1	MULTI-SECPEP	FU20160819-04	885.42	4	885.167	3536.64	64608.2	2.0594	0.0018229	0.72875	0.00064506	2.7881	0.0024679	885.419	80.103	0.38187	80.103	79.899	80.281	0					93	45	3	0	0	0	2.0152e-14	1	42870	89.08
	GQPVAPYNTTQFLMDDHDQEEPDLKTGLYSK	31	Unmodified	_GQPVAPYNTTQFLMDDHDQEEPDLKTGLYSK_					0	0	0	1	HEXI1_HUMANProteinHEXIM1	HEXI1_HUMANProteinHEXIM1	HEXI1_HUMANProteinHEXIM1	MULTI-SECPEP	FU20160819-04	885.168	4	885.167	3536.64	65606.2	1.7328	0.0015338	0.81566	0.000722	2.5485	0.0022558	885.419	82.948	0.13133	82.948	82.876	83.007	0					14	11	2	0	0	0	0.016527	1	45494	41.222
	GQPVAPYNTTQFLMDDHDQEEPDLKTGLYSK	31	Unmodified	_GQPVAPYNTTQFLMDDHDQEEPDLKTGLYSK_					0	0	0	1	HEXI1_HUMANProteinHEXIM1	HEXI1_HUMANProteinHEXIM1	HEXI1_HUMANProteinHEXIM1	MULTI-SECPEP	FU20160819-04	885.67	4	885.167	3536.64	67026.6	3.9632	0.0035081	-1.3188	-0.0011674	2.6444	0.0023407	885.417	98.93	0.3504	98.93	98.719	99.069	7.6294e-06					61	35	3	0	0	0	0.024463	1	61210	38.196
	GQPVAPYNTTQFLMDDHDQEEPDLKTGLYSK	31	Unmodified	_GQPVAPYNTTQFLMDDHDQEEPDLKTGLYSK_					0	0	0	1	HEXI1_HUMANProteinHEXIM1	HEXI1_HUMANProteinHEXIM1	HEXI1_HUMANProteinHEXIM1	MULTI-SECPEP	FU20160819-04	885.168	4	885.167	3536.64	65246.9	3.8391	0.0033982	-1.3849	-0.0012258	2.4542	0.0021724	885.417	100.31	0.40288	100.31	100.17	100.57	0					64	41	3	0	0	0	0.005536	1	62444	47.616
	GQPVAPYNTTQFLMDDHDQEEPDLKTGLYSK	31	Unmodified	_GQPVAPYNTTQFLMDDHDQEEPDLKTGLYSK_					0	0	0	1	HEXI1_HUMANProteinHEXIM1	HEXI1_HUMANProteinHEXIM1	HEXI1_HUMANProteinHEXIM1	MULTI-SECPEP	FU20160819-04	885.923	4	885.167	3536.64	64041.9	3.9145	0.003465	-1.0255	-0.00090774	2.889	0.0025573	885.668	111.32	0.18081	111.32	111.18	111.36	0					33	18	3	0	0	0	0.029637	1	72392	36.767
	GQPVAPYNTTQFLMDDHDQEEPDLKTGLYSK	31	Unmodified	_GQPVAPYNTTQFLMDDHDQEEPDLKTGLYSK_					0	0	0	1	HEXI1_HUMANProteinHEXIM1	HEXI1_HUMANProteinHEXIM1	HEXI1_HUMANProteinHEXIM1	MULTI-MSMS	FU20160819-05	885.421	4	885.167	3536.64	63134	2.6865	0.002378	-0.44074	-0.00039013	2.2457	0.0019879	885.668	76.478	2.913	76.478	75.307	78.22	0					2254	332	8	0	0	0	6.2326e-28	7	38841	111.55
	GQPVAPYNTTQFLMDDHDQEEPDLKTGLYSK	31	Unmodified	_GQPVAPYNTTQFLMDDHDQEEPDLKTGLYSK_					0	0	0	1	HEXI1_HUMANProteinHEXIM1	HEXI1_HUMANProteinHEXIM1	HEXI1_HUMANProteinHEXIM1	MULTI-MSMS	FU20160819-05	1180.56	3	1179.89	3536.64	56278.3	2.1191	0.0025003	0.042163	4.9747e-05	2.1612	0.00255	1180.22	76.112	1.9495	76.112	75.669	77.619	0					1327	224	9	0	0	0	4.4757e-24	6	39230	108.05
	GQPVAPYNTTQFLMDDHDQEEPDLKTGLYSK	31	Unmodified	_GQPVAPYNTTQFLMDDHDQEEPDLKTGLYSK_					0	0	0	1	HEXI1_HUMANProteinHEXIM1	HEXI1_HUMANProteinHEXIM1	HEXI1_HUMANProteinHEXIM1	MULTI-MSMS	FU20160819-05	708.538	5	708.335	3536.64	72957.4	2.6938	0.0019081	0.32529	0.00023041	3.0191	0.0021386	708.737	76.074	0.28276	76.074	75.923	76.206	0					93	30	4	0	0	0	0.016303	1	39125	49.095
	GQPVAPYNTTQFLMDDHDQEEPDLKTGLYSK	31	Unmodified	_GQPVAPYNTTQFLMDDHDQEEPDLKTGLYSK_					0	0	0	1	HEXI1_HUMANProteinHEXIM1	HEXI1_HUMANProteinHEXIM1	HEXI1_HUMANProteinHEXIM1	MULTI-MSMS	FU20160819-05	708.739	5	708.335	3536.64	72010.1	2.618	0.0018544	0.7408	0.00052473	3.3588	0.0023791	708.536	76.866	0.31765	76.866	76.693	77.011	0					64	40	2	0	0	0	4.5346e-10	1	39800	67.951
	GQPVAPYNTTQFLMDDHDQEEPDLKTGLYSK	31	Unmodified	_GQPVAPYNTTQFLMDDHDQEEPDLKTGLYSK_					0	0	0	1	HEXI1_HUMANProteinHEXIM1	HEXI1_HUMANProteinHEXIM1	HEXI1_HUMANProteinHEXIM1	MULTI-MSMS	FU20160819-05	885.419	4	885.167	3536.64	63544.8	2.4625	0.0021797	-0.6118	-0.00054155	1.8507	0.0016382	885.668	78.253	0.31356	78.253	78.052	78.366	0					60	41	2	0	0	0	1.4241e-19	1	40831	95.646
	GQPVAPYNTTQFLMDDHDQEEPDLKTGLYSK	31	Unmodified	_GQPVAPYNTTQFLMDDHDQEEPDLKTGLYSK_					0	0	0	1	HEXI1_HUMANProteinHEXIM1	HEXI1_HUMANProteinHEXIM1	HEXI1_HUMANProteinHEXIM1	MULTI-MSMS	FU20160819-05	1180.22	3	1179.89	3536.64	NaN	1.8832	0.002222	-0.91312	-0.0010774	0.97012	0.0011446	1180.56	78.22	0.028992	78.22	78.205	78.234	-7.6294e-06					5	3	2	0	0	0	0.014836	1	40882	38.526
	GQPVAPYNTTQFLMDDHDQEEPDLKTGLYSK	31	Unmodified	_GQPVAPYNTTQFLMDDHDQEEPDLKTGLYSK_					0	0	0	1	HEXI1_HUMANProteinHEXIM1	HEXI1_HUMANProteinHEXIM1	HEXI1_HUMANProteinHEXIM1	MULTI-MSMS	FU20160819-05	885.67	4	885.167	3536.64	64198	2.4362	0.0021564	-0.45805	-0.00040545	1.9781	0.001751	885.418	78.357	0.32292	78.357	78.22	78.543	0					111	43	4	0	0	0	7.4315e-15	1	40999	74.277
	GQPVAPYNTTQFLMDDHDQEEPDLKTGLYSK	31	Unmodified	_GQPVAPYNTTQFLMDDHDQEEPDLKTGLYSK_					0	0	0	1	HEXI1_HUMANProteinHEXIM1	HEXI1_HUMANProteinHEXIM1	HEXI1_HUMANProteinHEXIM1	MULTI-MSMS	FU20160819-05	885.17	4	885.167	3536.64	64341.8	2.3704	0.0020982	-0.3063	-0.00027113	2.0641	0.0018271	885.669	78.884	0.20817	78.884	78.745	78.953	0					49	25	3	0	0	0	4.9686e-19	1	41290	83.236
	GQPVAPYNTTQFLMDDHDQEEPDLKTGLYSK	31	Unmodified	_GQPVAPYNTTQFLMDDHDQEEPDLKTGLYSK_					0	0	0	1	HEXI1_HUMANProteinHEXIM1	HEXI1_HUMANProteinHEXIM1	HEXI1_HUMANProteinHEXIM1	MULTI-MSMS	FU20160819-05	885.67	4	885.167	3536.64	64748.7	2.3122	0.0020467	-0.23896	-0.00021152	2.0732	0.0018351	885.668	79.244	0.18179	79.244	79.179	79.361	0					32	23	2	0	0	0	2.46e-18	1	41522	75.191
	GQPVAPYNTTQFLMDDHDQEEPDLKTGLYSK	31	Unmodified	_GQPVAPYNTTQFLMDDHDQEEPDLKTGLYSK_					0	0	0	1	HEXI1_HUMANProteinHEXIM1	HEXI1_HUMANProteinHEXIM1	HEXI1_HUMANProteinHEXIM1	MULTI-MSMS	FU20160819-05	885.671	4	885.167	3536.64	64705.1	2.3105	0.0020452	-0.54927	-0.0004862	1.7612	0.001559	885.418	79.619	0.40028	79.619	79.451	79.851	0					95	52	3	0	0	0	4.3661e-14	1	41763	69.857
	GQPVAPYNTTQFLMDDHDQEEPDLKTGLYSK	31	Unmodified	_GQPVAPYNTTQFLMDDHDQEEPDLKTGLYSK_					0	0	0	1	HEXI1_HUMANProteinHEXIM1	HEXI1_HUMANProteinHEXIM1	HEXI1_HUMANProteinHEXIM1	MULTI-MSMS	FU20160819-05	885.421	4	885.167	3536.64	64705.2	2.3121	0.0020466	0.14332	0.00012686	2.4554	0.0021735	885.418	79.928	0.24432	79.928	79.751	79.996	0					61	30	3	0	0	0	0.00015978	1	42053	55.852
	GQPVAPYNTTQFLMDDHDQEEPDLKTGLYSK	31	Unmodified	_GQPVAPYNTTQFLMDDHDQEEPDLKTGLYSK_					0	0	0	1	HEXI1_HUMANProteinHEXIM1	HEXI1_HUMANProteinHEXIM1	HEXI1_HUMANProteinHEXIM1	MULTI-MSMS	FU20160819-05	885.17	4	885.167	3536.64	65520.4	2.315	0.0020492	0.37289	0.00033007	2.6879	0.0023792	885.669	80.312	0.33464	80.312	80.223	80.558	0					102	38	4	0	0	0	2.5025e-19	1	42340	93.176
	GQPVAPYNTTQFLMDDHDQEEPDLKTGLYSK	31	Unmodified	_GQPVAPYNTTQFLMDDHDQEEPDLKTGLYSK_					0	0	0	1	HEXI1_HUMANProteinHEXIM1	HEXI1_HUMANProteinHEXIM1	HEXI1_HUMANProteinHEXIM1	MULTI-MSMS	FU20160819-05	885.42	4	885.167	3536.64	64757.1	2.3155	0.0020496	0.23898	0.00021153	2.5545	0.0022611	885.418	80.658	0.56635	80.658	80.518	81.085	7.6294e-06					135	61	4	0	0	0	1.1159e-19	2	42672	96.351
	GQPVAPYNTTQFLMDDHDQEEPDLKTGLYSK	31	Unmodified	_GQPVAPYNTTQFLMDDHDQEEPDLKTGLYSK_					0	0	0	1	HEXI1_HUMANProteinHEXIM1	HEXI1_HUMANProteinHEXIM1	HEXI1_HUMANProteinHEXIM1	MULTI-MSMS	FU20160819-05	885.421	4	885.167	3536.64	70384.1	2.3231	0.0020563	0.074302	6.577e-05	2.3974	0.0021221	885.418	82.024	0.12355	82.024	81.922	82.045	0					22	14	2	0	0	0	0.0073303	1	43988	43.291
	GQPVAPYNTTQFLMDDHDQEEPDLKTGLYSK	31	Unmodified	_GQPVAPYNTTQFLMDDHDQEEPDLKTGLYSK_					0	0	0	1	HEXI1_HUMANProteinHEXIM1	HEXI1_HUMANProteinHEXIM1	HEXI1_HUMANProteinHEXIM1	MULTI-MSMS	FU20160819-05	885.919	4	885.167	3536.64	63982.9	2.4208	0.0021428	-0.28152	-0.00024919	2.1393	0.0018936	885.669	84.298	0.29443	84.298	84.162	84.457	-7.6294e-06					33	28	2	0	0	0	4.6834e-14	2	46139	69.47
	GQPVAPYNTTQFLMDDHDQEEPDLKTGLYSK	31	Unmodified	_GQPVAPYNTTQFLMDDHDQEEPDLKTGLYSK_					0	0	0	1	HEXI1_HUMANProteinHEXIM1	HEXI1_HUMANProteinHEXIM1	HEXI1_HUMANProteinHEXIM1	MULTI-MSMS	FU20160819-05	885.671	4	885.167	3536.64	67238.2	2.7231	0.0024104	-0.33994	-0.0003009	2.3831	0.0021095	885.418	87.699	0.41177	87.699	87.443	87.855	0					45	38	2	0	0	0	0.034509	1	49838	32.33
	GQPVAPYNTTQFLMDDHDQEEPDLKTGLYSK	31	Unmodified	_GQPVAPYNTTQFLMDDHDQEEPDLKTGLYSK_					0	0	0	1	HEXI1_HUMANProteinHEXIM1	HEXI1_HUMANProteinHEXIM1	HEXI1_HUMANProteinHEXIM1	MULTI-MSMS	FU20160819-05	885.67	4	885.167	3536.64	64684.8	3.7388	0.0033095	-1.4376	-0.0012725	2.3012	0.0020369	885.667	90.598	0.282	90.598	90.428	90.71	-7.6294e-06					56	26	5	0	0	0	0.0043232	1	52799	46.404
	GQPVAPYNTTQFLMDDHDQEEPDLKTGLYSK	31	Unmodified	_GQPVAPYNTTQFLMDDHDQEEPDLKTGLYSK_					0	0	0	1	HEXI1_HUMANProteinHEXIM1	HEXI1_HUMANProteinHEXIM1	HEXI1_HUMANProteinHEXIM1	MULTI-MSMS	FU20160819-05	885.171	4	885.167	3536.64	65297.4	3.7312	0.0033027	-1.0036	-0.00088833	2.7276	0.0024144	885.668	90.825	0.23234	90.825	90.64	90.873	-7.6294e-06					42	21	3	0	0	0	0.0026946	1	53071	48.626
	GQPVAPYNTTQFLMDDHDQEEPDLKTGLYSK	31	Unmodified	_GQPVAPYNTTQFLMDDHDQEEPDLKTGLYSK_					0	0	0	1	HEXI1_HUMANProteinHEXIM1	HEXI1_HUMANProteinHEXIM1	HEXI1_HUMANProteinHEXIM1	MULTI-MSMS	FU20160819-05	885.672	4	885.167	3536.64	63061.7	3.6969	0.0032724	-0.5328	-0.00047162	3.1641	0.0028008	885.668	91.507	0.3155	91.507	91.348	91.664	0					64	28	4	0	0	0	0.025323	1	53643	34.885
	GQPVAPYNTTQFLMDDHDQEEPDLKTGLYSK	31	Unmodified	_GQPVAPYNTTQFLMDDHDQEEPDLKTGLYSK_					0	0	0	1	HEXI1_HUMANProteinHEXIM1	HEXI1_HUMANProteinHEXIM1	HEXI1_HUMANProteinHEXIM1	MULTI-MSMS	FU20160819-05	885.421	4	885.167	3536.64	65293.6	3.6857	0.0032625	-1.3287	-0.0011761	2.357	0.0020864	885.417	91.757	0.35384	91.757	91.599	91.953	0					55	29	3	0	0	0	0.011072	2	53979	39.737
	GQPVAPYNTTQFLMDDHDQEEPDLKTGLYSK	31	Unmodified	_GQPVAPYNTTQFLMDDHDQEEPDLKTGLYSK_					0	0	0	1	HEXI1_HUMANProteinHEXIM1	HEXI1_HUMANProteinHEXIM1	HEXI1_HUMANProteinHEXIM1	MULTI-MSMS	FU20160819-05	885.425	4	885.167	3536.64	63986.5	3.8523	0.0034099	-1.438	-0.0012729	2.4142	0.002137	885.667	93.027	0.2813	93.027	92.905	93.186	0					66	27	6	0	0	0	0.00015978	2	55184	55.852
	GQPVAPYNTTQFLMDDHDQEEPDLKTGLYSK	31	Unmodified	_GQPVAPYNTTQFLMDDHDQEEPDLKTGLYSK_					0	0	0	1	HEXI1_HUMANProteinHEXIM1	HEXI1_HUMANProteinHEXIM1	HEXI1_HUMANProteinHEXIM1	MULTI-MSMS	FU20160819-05	885.171	4	885.167	3536.64	63218.6	4.0667	0.0035997	-3.2231	-0.002853	0.84361	0.00074674	885.416	94.117	0.26315	94.117	93.912	94.175	0					28	22	2	0	0	0	0.00059091	2	56063	51.586
	GQPVAPYNTTQFLMDDHDQEEPDLKTGLYSK	31	Unmodified	_GQPVAPYNTTQFLMDDHDQEEPDLKTGLYSK_					0	0	0	1	HEXI1_HUMANProteinHEXIM1	HEXI1_HUMANProteinHEXIM1	HEXI1_HUMANProteinHEXIM1	MULTI-MSMS	FU20160819-05	885.419	4	885.167	3536.64	63901.8	4.1112	0.0036391	-1.3179	-0.0011665	2.7933	0.0024726	885.418	95.45	0.10105	95.45	95.401	95.502	0					26	9	4	0	0	0	0.0089176	1	57243	41.784
	GQPVAPYNTTQFLMDDHDQEEPDLKTGLYSK	31	Unmodified	_GQPVAPYNTTQFLMDDHDQEEPDLKTGLYSK_					0	0	0	1	HEXI1_HUMANProteinHEXIM1	HEXI1_HUMANProteinHEXIM1	HEXI1_HUMANProteinHEXIM1	MULTI-MSMS	FU20160819-05	885.421	4	885.167	3536.64	64223.4	4.0684	0.0036012	-0.59968	-0.00053082	3.4687	0.0030704	885.418	95.987	0.27556	95.987	95.835	96.111	0					66	21	6	0	0	0	1.1917e-18	1	57727	78.343
	GQPVAPYNTTQFLMDDHDQEEPDLKTGLYSK	31	Unmodified	_GQPVAPYNTTQFLMDDHDQEEPDLKTGLYSK_					0	0	0	1	HEXI1_HUMANProteinHEXIM1	HEXI1_HUMANProteinHEXIM1	HEXI1_HUMANProteinHEXIM1	MULTI-MSMS	FU20160819-05	885.426	4	885.167	3536.64	62588	5.3108	0.0047009	-1.733	-0.001534	3.5778	0.0031669	885.667	104.62	0.15035	104.62	104.56	104.71	0					47	15	6	0	0	0	0.00059091	1	64474	51.586
	GQPVAPYNTTQFLMDDHDQEEPDLKTGLYSK	31	Unmodified	_GQPVAPYNTTQFLMDDHDQEEPDLKTGLYSK_					0	0	0	1	HEXI1_HUMANProteinHEXIM1	HEXI1_HUMANProteinHEXIM1	HEXI1_HUMANProteinHEXIM1	MULTI-MSMS	FU20160819-05	885.922	4	885.167	3536.64	67880.4	5.5316	0.0048964	-2.6701	-0.0023634	2.8615	0.0025329	885.415	109.49	0.16574	109.49	109.38	109.55	0					24	20	2	0	0	0	0.01844	1	68161	37.196
	GQPVAPYNTTQFLMDDHDQEEPDLKTGLYSK	31	Unmodified	_GQPVAPYNTTQFLMDDHDQEEPDLKTGLYSK_					0	0	0	1	HEXI1_HUMANProteinHEXIM1	HEXI1_HUMANProteinHEXIM1	HEXI1_HUMANProteinHEXIM1	MULTI-MSMS	FU20160819-05	885.42	4	885.167	3536.64	65111.2	3.8245	0.0033853	-0.45727	-0.00040476	3.3672	0.0029806	885.668	119.82	0.36343	119.82	119.58	119.94	0					52	48	2	0	0	0	0.023343	1	75004	35.55
	GQPVAPYNTTQFLMDDHDQEEPDLKTGLYSK	31	Unmodified	_GQPVAPYNTTQFLMDDHDQEEPDLKTGLYSK_					0	0	0	1	HEXI1_HUMANProteinHEXIM1	HEXI1_HUMANProteinHEXIM1	HEXI1_HUMANProteinHEXIM1	MULTI-SECPEP	FU20160819-05	708.338	5	708.335	3536.64	71526.9	2.6748	0.0018947	0.61519	0.00043576	3.29	0.0023304	708.737	76.241	0.12664	76.241	76.198	76.325	0					34	16	3	0	0	0	6.8832e-32	1	39299	103.85
	GQPVAPYNTTQFLMDDHDQEEPDLKTGLYSK	31	Unmodified	_GQPVAPYNTTQFLMDDHDQEEPDLKTGLYSK_					0	0	0	1	HEXI1_HUMANProteinHEXIM1	HEXI1_HUMANProteinHEXIM1	HEXI1_HUMANProteinHEXIM1	MULTI-SECPEP	FU20160819-05	885.17	4	885.167	3536.64	67275.4	2.3467	0.0020772	-0.12087	-0.00010699	2.2258	0.0019702	885.418	83.728	0.31789	83.728	83.599	83.917	0					58	33	3	0	0	0	0.03079	1	45561	36.448
	GQPVAPYNTTQFLMDDHDQEEPDLKTGLYSK	31	Unmodified	_GQPVAPYNTTQFLMDDHDQEEPDLKTGLYSK_					0	0	0	1	HEXI1_HUMANProteinHEXIM1	HEXI1_HUMANProteinHEXIM1	HEXI1_HUMANProteinHEXIM1	MULTI-SECPEP	FU20160819-05	885.923	4	885.167	3536.64	66295.3	3.7448	0.0033147	-1.4496	-0.0012831	2.2952	0.0020316	885.417	92.476	0.078072	92.476	92.414	92.492	7.6294e-06					10	8	2	0	0	0	0.022085	1	54611	38.526
	GQPVAPYNTTQFLMDDHDQEEPDLKTGLYSK	31	Unmodified	_GQPVAPYNTTQFLMDDHDQEEPDLKTGLYSK_					0	0	0	1	HEXI1_HUMANProteinHEXIM1	HEXI1_HUMANProteinHEXIM1	HEXI1_HUMANProteinHEXIM1	MULTI-SECPEP	FU20160819-05	884.913	4	885.167	3536.64	59346.4	3.7909	0.0033556	-3.2218	-0.0028518	0.56909	0.00050374	885.414	92.633	0.33122	92.633	92.574	92.905	0					39	32	2	0	0	0	0.010941	1	54802	44.164
	GQPVAPYNTTQFLMDDHDQEEPDLKTGLYSK	31	Unmodified	_GQPVAPYNTTQFLMDDHDQEEPDLKTGLYSK_					0	0	0	1	HEXI1_HUMANProteinHEXIM1	HEXI1_HUMANProteinHEXIM1	HEXI1_HUMANProteinHEXIM1	MULTI-SECPEP	FU20160819-05	885.169	4	885.167	3536.64	60262.8	5.0418	0.0044628	0.69819	0.00061801	5.74	0.0050808	885.67	99.842	0.075943	99.842	99.79	99.866	-7.6294e-06					13	7	3	0	0	0	0.0014028	1	60733	59.282
	GQPVAPYNTTQFLMDDHDQEEPDLKTGLYSK	31	Unmodified	_GQPVAPYNTTQFLMDDHDQEEPDLKTGLYSK_					0	0	0	1	HEXI1_HUMANProteinHEXIM1	HEXI1_HUMANProteinHEXIM1	HEXI1_HUMANProteinHEXIM1	MULTI-MSMS	FU20160819-07	885.671	4	885.167	3536.64	63849.9	2.8509	0.0025235	-0.34198	-0.00030271	2.5089	0.0022208	885.418	76.674	0.95174	76.674	76.176	77.128	0					317	97	5	0	0	0	4.3914e-19	1	37568	82.942
	GQPVAPYNTTQFLMDDHDQEEPDLKTGLYSK	31	Unmodified	_GQPVAPYNTTQFLMDDHDQEEPDLKTGLYSK_					0	0	0	1	HEXI1_HUMANProteinHEXIM1	HEXI1_HUMANProteinHEXIM1	HEXI1_HUMANProteinHEXIM1	MULTI-MSMS	FU20160819-07	885.419	4	885.167	3536.64	64071.6	2.5474	0.0022549	-0.15279	-0.00013524	2.3946	0.0021196	885.669	77.3	0.60513	77.3	77.12	77.725	0					181	60	6	0	0	0	7.0382e-20	2	38232	97.295
	GQPVAPYNTTQFLMDDHDQEEPDLKTGLYSK	31	Unmodified	_GQPVAPYNTTQFLMDDHDQEEPDLKTGLYSK_					0	0	0	1	HEXI1_HUMANProteinHEXIM1	HEXI1_HUMANProteinHEXIM1	HEXI1_HUMANProteinHEXIM1	MULTI-MSMS	FU20160819-08	885.421	4	885.167	3536.64	63582.3	2.4318	0.0021526	0.62389	0.00055225	3.0557	0.0027048	885.669	77.361	0.4391	77.361	77.094	77.533	0					108	40	4	0	0	0	2.3924e-06	1	39659	57.845
	GQPVAPYNTTQFLMDDHDQEEPDLKTGLYSK	31	Unmodified	_GQPVAPYNTTQFLMDDHDQEEPDLKTGLYSK_					0	0	0	1	HEXI1_HUMANProteinHEXIM1	HEXI1_HUMANProteinHEXIM1	HEXI1_HUMANProteinHEXIM1	MULTI-MSMS	FU20160819-08	885.672	4	885.167	3536.64	63568.5	2.3555	0.002085	0.087799	7.7717e-05	2.4433	0.0021628	885.669	77.581	0.21943	77.581	77.519	77.738	0					63	22	6	0	0	0	2.3012e-19	1	39989	80.733
	GQPVAPYNTTQFLMDDHDQEEPDLKTGLYSK	31	Unmodified	_GQPVAPYNTTQFLMDDHDQEEPDLKTGLYSK_					0	0	0	1	HEXI1_HUMANProteinHEXIM1	HEXI1_HUMANProteinHEXIM1	HEXI1_HUMANProteinHEXIM1	MULTI-SECPEP	FU20160819-08	885.419	4	885.167	3536.64	63884.3	2.7297	0.0024162	-0.19377	-0.00017152	2.5359	0.0022447	885.669	76.457	0.18469	76.457	76.294	76.479	0					25	18	3	0	0	0	0.026337	1	38829	37.678
221227	GQPVAPYNTTQFLMDDHDQEEPDLKTGLYSKR	32	Unmodified	_GQPVAPYNTTQFLMDDHDQEEPDLKTGLYSKR_					0	0	0	2	HEXI1_HUMANProteinHEXIM1	HEXI1_HUMANProteinHEXIM1	HEXI1_HUMANProteinHEXIM1	MULTI-MSMS	FU20160819-04	924.697	4	924.193	3692.74	62340.8	2.8474	0.0026315	-0.060782	-5.6174e-05	2.7866	0.0025754	924.694	70.495	2.2788	70.495	69.695	71.974	0					1330	284	8	0	0	0	9.0401e-19	6	34576	88.433
	GQPVAPYNTTQFLMDDHDQEEPDLKTGLYSKR	32	Unmodified	_GQPVAPYNTTQFLMDDHDQEEPDLKTGLYSKR_					0	0	0	2	HEXI1_HUMANProteinHEXIM1	HEXI1_HUMANProteinHEXIM1	HEXI1_HUMANProteinHEXIM1	MULTI-MSMS	FU20160819-04	1232.59	3	1231.92	3692.74	55175.8	2.4631	0.0030343	-0.35757	-0.0004405	2.1055	0.0025938	1232.59	70.354	0.58484	70.354	70.006	70.591	0					194	74	4	0	0	0	1.7714e-29	1	34709	116.6
	GQPVAPYNTTQFLMDDHDQEEPDLKTGLYSKR	32	Unmodified	_GQPVAPYNTTQFLMDDHDQEEPDLKTGLYSKR_					0	0	0	2	HEXI1_HUMANProteinHEXIM1	HEXI1_HUMANProteinHEXIM1	HEXI1_HUMANProteinHEXIM1	MULTI-MSMS	FU20160819-04	739.959	5	739.556	3692.74	69039.8	1.6473	0.0012183	1.3771	0.0010184	3.0244	0.0022367	739.958	70.432	2.4442	70.432	69.621	72.065	0					1565	304	9	0	0	0	9.2404e-08	2	34713	62.993
	GQPVAPYNTTQFLMDDHDQEEPDLKTGLYSKR	32	Unmodified	_GQPVAPYNTTQFLMDDHDQEEPDLKTGLYSKR_					0	0	0	2	HEXI1_HUMANProteinHEXIM1	HEXI1_HUMANProteinHEXIM1	HEXI1_HUMANProteinHEXIM1	MULTI-MSMS	FU20160819-04	739.957	5	739.556	3692.74	69165.9	1.9994	0.0014787	-0.98089	-0.00072542	1.0186	0.00075328	739.956	73.61	0.14273	73.61	73.54	73.683	0					25	15	2	0	0	0	0.0077222	1	37357	40.849
	GQPVAPYNTTQFLMDDHDQEEPDLKTGLYSKR	32	Unmodified	_GQPVAPYNTTQFLMDDHDQEEPDLKTGLYSKR_					0	0	0	2	HEXI1_HUMANProteinHEXIM1	HEXI1_HUMANProteinHEXIM1	HEXI1_HUMANProteinHEXIM1	MULTI-MSMS	FU20160819-04	924.444	4	924.193	3692.74	62612.9	3.3841	0.0031275	-1.5832	-0.0014632	1.8009	0.0016644	924.692	73.839	0.062126	73.839	73.804	73.866	0					7	6	2	0	0	0	0.00061282	2	37504	51.386
	GQPVAPYNTTQFLMDDHDQEEPDLKTGLYSKR	32	Unmodified	_GQPVAPYNTTQFLMDDHDQEEPDLKTGLYSKR_					0	0	0	2	HEXI1_HUMANProteinHEXIM1	HEXI1_HUMANProteinHEXIM1	HEXI1_HUMANProteinHEXIM1	MULTI-MSMS	FU20160819-04	739.759	5	739.556	3692.74	69515.6	2.2215	0.0016429	-1.6427	-0.0012149	0.57879	0.00042805	739.956	73.871	0.13542	73.871	73.804	73.94	0					30	14	3	0	0	0	0.023649	1	37566	33.986
	GQPVAPYNTTQFLMDDHDQEEPDLKTGLYSKR	32	Unmodified	_GQPVAPYNTTQFLMDDHDQEEPDLKTGLYSKR_					0	0	0	2	HEXI1_HUMANProteinHEXIM1	HEXI1_HUMANProteinHEXIM1	HEXI1_HUMANProteinHEXIM1	MULTI-MSMS	FU20160819-04	739.759	5	739.556	3692.74	71498.8	2.5922	0.0019171	-2.0665	-0.0015283	0.5257	0.00038878	739.955	74.649	0.19746	74.649	74.571	74.768	0					34	21	2	0	0	0	0.0071792	1	38362	41.434
	GQPVAPYNTTQFLMDDHDQEEPDLKTGLYSKR	32	Unmodified	_GQPVAPYNTTQFLMDDHDQEEPDLKTGLYSKR_					0	0	0	2	HEXI1_HUMANProteinHEXIM1	HEXI1_HUMANProteinHEXIM1	HEXI1_HUMANProteinHEXIM1	MULTI-SECPEP	FU20160819-04	924.697	4	924.193	3692.74	64633.1	2.6287	0.0024295	-2.0967	-0.0019377	0.53208	0.00049175	924.943	73.074	0.14378	73.074	72.985	73.129	7.6294e-06					38	18	3	0	0	0	3.678e-14	1	36908	86.997
	GQPVAPYNTTQFLMDDHDQEEPDLKTGLYSKR	32	Unmodified	_GQPVAPYNTTQFLMDDHDQEEPDLKTGLYSKR_					0	0	0	2	HEXI1_HUMANProteinHEXIM1	HEXI1_HUMANProteinHEXIM1	HEXI1_HUMANProteinHEXIM1	MULTI-MSMS	FU20160819-05	739.959	5	739.556	3692.74	68943	1.3857	0.0010248	1.419	0.0010494	2.8047	0.0020742	739.958	70.483	2.4893	70.483	69.816	72.306	0					1754	308	9	0	0	0	9.2404e-08	6	34376	62.993
	GQPVAPYNTTQFLMDDHDQEEPDLKTGLYSKR	32	Unmodified	_GQPVAPYNTTQFLMDDHDQEEPDLKTGLYSKR_					0	0	0	2	HEXI1_HUMANProteinHEXIM1	HEXI1_HUMANProteinHEXIM1	HEXI1_HUMANProteinHEXIM1	MULTI-MSMS	FU20160819-05	924.697	4	924.193	3692.74	62467.7	2.114	0.0019537	0.46802	0.00043254	2.582	0.0023862	924.695	70.497	1.626	70.497	69.949	71.575	0					1255	202	9	0	0	0	1.8058e-10	4	34347	65.223
	GQPVAPYNTTQFLMDDHDQEEPDLKTGLYSKR	32	Unmodified	_GQPVAPYNTTQFLMDDHDQEEPDLKTGLYSKR_					0	0	0	2	HEXI1_HUMANProteinHEXIM1	HEXI1_HUMANProteinHEXIM1	HEXI1_HUMANProteinHEXIM1	MULTI-MSMS	FU20160819-05	1232.59	3	1231.92	3692.74	55534.7	1.9439	0.0023948	0.042615	5.2498e-05	1.9865	0.0024473	1232.26	70.497	0.81326	70.497	70.092	70.905	0					307	99	6	0	0	0	1.4844e-10	1	34353	68.101
	GQPVAPYNTTQFLMDDHDQEEPDLKTGLYSKR	32	Unmodified	_GQPVAPYNTTQFLMDDHDQEEPDLKTGLYSKR_					0	0	0	2	HEXI1_HUMANProteinHEXIM1	HEXI1_HUMANProteinHEXIM1	HEXI1_HUMANProteinHEXIM1	MULTI-MSMS	FU20160819-05	924.445	4	924.193	3692.74	62064.6	2.0967	0.0019378	0.32558	0.0003009	2.4223	0.0022387	924.694	71.602	0.5475	71.602	71.56	72.107	0					101	65	3	0	0	0	9.9908e-19	2	35293	87.792
	GQPVAPYNTTQFLMDDHDQEEPDLKTGLYSKR	32	Unmodified	_GQPVAPYNTTQFLMDDHDQEEPDLKTGLYSKR_					0	0	0	2	HEXI1_HUMANProteinHEXIM1	HEXI1_HUMANProteinHEXIM1	HEXI1_HUMANProteinHEXIM1	MULTI-MSMS	FU20160819-05	740.158	5	739.556	3692.74	69051.1	1.3983	0.0010341	0.021797	1.612e-05	1.4201	0.0010503	739.756	72.738	0.44206	72.738	72.51	72.952	0					92	54	3	0	0	0	8.4192e-07	1	35888	60.23
	GQPVAPYNTTQFLMDDHDQEEPDLKTGLYSKR	32	Unmodified	_GQPVAPYNTTQFLMDDHDQEEPDLKTGLYSKR_					0	0	0	2	HEXI1_HUMANProteinHEXIM1	HEXI1_HUMANProteinHEXIM1	HEXI1_HUMANProteinHEXIM1	MULTI-MSMS	FU20160819-05	924.197	4	924.193	3692.74	65386.8	2.1029	0.0019435	-0.88898	-0.00082159	1.2139	0.0011219	924.943	72.578	0.24843	72.578	72.466	72.715	0					54	30	3	0	0	0	5.6099e-19	1	35976	90.744
	GQPVAPYNTTQFLMDDHDQEEPDLKTGLYSKR	32	Unmodified	_GQPVAPYNTTQFLMDDHDQEEPDLKTGLYSKR_					0	0	0	2	HEXI1_HUMANProteinHEXIM1	HEXI1_HUMANProteinHEXIM1	HEXI1_HUMANProteinHEXIM1	MULTI-MSMS	FU20160819-05	924.696	4	924.193	3692.74	64065.6	2.2544	0.0020835	-0.76569	-0.00070764	1.4888	0.0013759	924.693	73.301	0.25171	73.301	73.225	73.477	0					47	30	2	0	0	0	2.4862e-14	1	36504	71.794
	GQPVAPYNTTQFLMDDHDQEEPDLKTGLYSKR	32	Unmodified	_GQPVAPYNTTQFLMDDHDQEEPDLKTGLYSKR_					0	0	0	2	HEXI1_HUMANProteinHEXIM1	HEXI1_HUMANProteinHEXIM1	HEXI1_HUMANProteinHEXIM1	MULTI-MSMS	FU20160819-05	740.158	5	739.556	3692.74	69051.1	1.5854	0.0011725	0.19778	0.00014627	1.7832	0.0013188	739.957	73.603	0.39874	73.603	73.469	73.868	0					123	44	5	0	0	0	3.3543e-15	1	36731	74.525
	GQPVAPYNTTQFLMDDHDQEEPDLKTGLYSKR	32	Unmodified	_GQPVAPYNTTQFLMDDHDQEEPDLKTGLYSKR_					0	0	0	2	HEXI1_HUMANProteinHEXIM1	HEXI1_HUMANProteinHEXIM1	HEXI1_HUMANProteinHEXIM1	MULTI-MSMS	FU20160819-05	739.958	5	739.556	3692.74	69262.6	1.7188	0.0012711	-0.28116	-0.00020793	1.4376	0.0010632	739.956	74.617	0.33284	74.617	74.565	74.898	0					49	37	2	0	0	0	0.00026792	1	37817	53.209
	GQPVAPYNTTQFLMDDHDQEEPDLKTGLYSKR	32	Unmodified	_GQPVAPYNTTQFLMDDHDQEEPDLKTGLYSKR_					0	0	0	2	HEXI1_HUMANProteinHEXIM1	HEXI1_HUMANProteinHEXIM1	HEXI1_HUMANProteinHEXIM1	MULTI-SECPEP	FU20160819-05	924.871	4	924.193	3692.74	66018.8	2.0911	0.0019326	0.0028848	2.6661e-06	2.094	0.0019353	924.694	72.185	0.11539	72.185	72.107	72.223	0					19	13	2	0	0	0	0.00034553	1	35665	49.394
	GQPVAPYNTTQFLMDDHDQEEPDLKTGLYSKR	32	Unmodified	_GQPVAPYNTTQFLMDDHDQEEPDLKTGLYSKR_					0	0	0	2	HEXI1_HUMANProteinHEXIM1	HEXI1_HUMANProteinHEXIM1	HEXI1_HUMANProteinHEXIM1	MULTI-MSMS	FU20160819-07	1232.59	3	1231.92	3692.74	54929.9	2.6821	0.0033042	-0.66759	-0.00082242	2.0145	0.0024818	1232.59	70.257	0.53455	70.257	70.108	70.642	0					385	61	8	0	0	0	8.9248e-19	2	33315	80.439
	GQPVAPYNTTQFLMDDHDQEEPDLKTGLYSKR	32	Unmodified	_GQPVAPYNTTQFLMDDHDQEEPDLKTGLYSKR_					0	0	0	2	HEXI1_HUMANProteinHEXIM1	HEXI1_HUMANProteinHEXIM1	HEXI1_HUMANProteinHEXIM1	MULTI-MSMS	FU20160819-07	924.696	4	924.193	3692.74	61813.6	2.3186	0.0021428	-0.036254	-3.3506e-05	2.2823	0.0021093	924.694	70.241	0.679	70.241	69.963	70.642	-7.6294e-06					545	75	9	0	0	0	7.555e-19	1	33163	89.434
	GQPVAPYNTTQFLMDDHDQEEPDLKTGLYSKR	32	Unmodified	_GQPVAPYNTTQFLMDDHDQEEPDLKTGLYSKR_					0	0	0	2	HEXI1_HUMANProteinHEXIM1	HEXI1_HUMANProteinHEXIM1	HEXI1_HUMANProteinHEXIM1	MULTI-MSMS	FU20160819-07	924.697	4	924.193	3692.74	62045	2.4986	0.0023092	-0.62039	-0.00057336	1.8782	0.0017358	924.694	70.661	0.54831	70.661	70.616	71.165	0					394	67	8	0	0	0	5.0821e-19	2	33407	91.1
	GQPVAPYNTTQFLMDDHDQEEPDLKTGLYSKR	32	Unmodified	_GQPVAPYNTTQFLMDDHDQEEPDLKTGLYSKR_					0	0	0	2	HEXI1_HUMANProteinHEXIM1	HEXI1_HUMANProteinHEXIM1	HEXI1_HUMANProteinHEXIM1	MULTI-MSMS	FU20160819-07	924.445	4	924.193	3692.74	61707.2	3.6156	0.0033415	-2.8162	-0.0026027	0.79938	0.00073878	924.692	73.236	0.35391	73.236	73.016	73.37	0					111	40	6	0	0	0	5.8858e-19	1	35055	79.67
	GQPVAPYNTTQFLMDDHDQEEPDLKTGLYSKR	32	Unmodified	_GQPVAPYNTTQFLMDDHDQEEPDLKTGLYSKR_					0	0	0	2	HEXI1_HUMANProteinHEXIM1	HEXI1_HUMANProteinHEXIM1	HEXI1_HUMANProteinHEXIM1	MULTI-MSMS	FU20160819-07	739.758	5	739.556	3692.74	67292.8	0.64958	0.0004804	1.7675	0.0013071	2.4171	0.0017875	739.758	73.129	0.82861	73.129	72.728	73.557	0					229	94	6	0	0	0	1.4564e-10	1	35175	64.574
	GQPVAPYNTTQFLMDDHDQEEPDLKTGLYSKR	32	Unmodified	_GQPVAPYNTTQFLMDDHDQEEPDLKTGLYSKR_					0	0	0	2	HEXI1_HUMANProteinHEXIM1	HEXI1_HUMANProteinHEXIM1	HEXI1_HUMANProteinHEXIM1	MULTI-MSMS	FU20160819-07	924.695	4	924.193	3692.74	61707.2	3.7278	0.0034452	-2.6715	-0.002469	1.0563	0.00097622	924.692	73.51	0.35941	73.51	73.271	73.631	-7.6294e-06					129	41	6	0	0	0	1.9576e-18	1	35331	75.868
	GQPVAPYNTTQFLMDDHDQEEPDLKTGLYSKR	32	Unmodified	_GQPVAPYNTTQFLMDDHDQEEPDLKTGLYSKR_					0	0	0	2	HEXI1_HUMANProteinHEXIM1	HEXI1_HUMANProteinHEXIM1	HEXI1_HUMANProteinHEXIM1	MULTI-MSMS	FU20160819-07	739.759	5	739.556	3692.74	67344.7	0.89409	0.00066123	1.8905	0.0013981	2.7846	0.0020594	739.958	73.697	0.85753	73.697	73.377	74.235	0					351	91	7	0	0	0	1.3179e-07	2	35444	62.848
	GQPVAPYNTTQFLMDDHDQEEPDLKTGLYSKR	32	Unmodified	_GQPVAPYNTTQFLMDDHDQEEPDLKTGLYSKR_					0	0	0	2	HEXI1_HUMANProteinHEXIM1	HEXI1_HUMANProteinHEXIM1	HEXI1_HUMANProteinHEXIM1	MULTI-MSMS	FU20160819-07	924.946	4	924.193	3692.74	61620.9	3.8525	0.0035604	-2.1287	-0.0019673	1.7238	0.0015931	924.693	73.711	0.55696	73.711	73.522	74.079	0					230	57	7	0	0	0	1.5741e-10	1	35656	65.741
	GQPVAPYNTTQFLMDDHDQEEPDLKTGLYSKR	32	Unmodified	_GQPVAPYNTTQFLMDDHDQEEPDLKTGLYSKR_					0	0	0	2	HEXI1_HUMANProteinHEXIM1	HEXI1_HUMANProteinHEXIM1	HEXI1_HUMANProteinHEXIM1	MULTI-SECPEP	FU20160819-07	740.33	5	739.556	3692.74	68124.5	0.27334	0.00020215	1.3037	0.00096412	1.577	0.0011663	739.958	72.346	0.080879	72.346	72.302	72.383	0					15	9	2	0	0	0	0.0031725	1	34432	66.972
	GQPVAPYNTTQFLMDDHDQEEPDLKTGLYSKR	32	Unmodified	_GQPVAPYNTTQFLMDDHDQEEPDLKTGLYSKR_					0	0	0	2	HEXI1_HUMANProteinHEXIM1	HEXI1_HUMANProteinHEXIM1	HEXI1_HUMANProteinHEXIM1	MULTI-SECPEP	FU20160819-07	738.84	5	739.556	3692.74	73938.1	-0.011631	-8.6018e-06	2.3159	0.0017127	2.3043	0.0017041	739.959	76.378	0.24423	76.378	76.263	76.508	0					47	26	3	0	0	0	0.00017519	1	37509	52.237
	GQPVAPYNTTQFLMDDHDQEEPDLKTGLYSKR	32	Unmodified	_GQPVAPYNTTQFLMDDHDQEEPDLKTGLYSKR_					0	0	0	2	HEXI1_HUMANProteinHEXIM1	HEXI1_HUMANProteinHEXIM1	HEXI1_HUMANProteinHEXIM1	MULTI-SECPEP	FU20160819-07	738.838	5	739.556	3692.74	74284.4	-0.11941	-8.8309e-05	2.4569	0.001817	2.3374	0.0017287	739.758	76.616	0.29254	76.616	76.518	76.81	0					50	27	3	0	0	0	0.0023424	1	37857	48.18
	GQPVAPYNTTQFLMDDHDQEEPDLKTGLYSKR	32	Unmodified	_GQPVAPYNTTQFLMDDHDQEEPDLKTGLYSKR_					0	0	0	2	HEXI1_HUMANProteinHEXIM1	HEXI1_HUMANProteinHEXIM1	HEXI1_HUMANProteinHEXIM1	MULTI-SECPEP	FU20160819-07	1232.59	3	1231.92	3692.74	54898.2	2.8458	0.0035058	-1.391	-0.0017136	1.4548	0.0017922	1232.25	70.673	0.3855	70.673	70.616	71.002	0					163	46	6	0	0	0	0.00040767	1	33550	57.629
	GQPVAPYNTTQFLMDDHDQEEPDLKTGLYSKR	32	Unmodified	_GQPVAPYNTTQFLMDDHDQEEPDLKTGLYSKR_					0	0	0	2	HEXI1_HUMANProteinHEXIM1	HEXI1_HUMANProteinHEXIM1	HEXI1_HUMANProteinHEXIM1	MULTI-MSMS	FU20160819-08	739.76	5	739.556	3692.74	68877.8	1.7312	0.0012804	1.3736	0.0010159	3.1049	0.0022962	739.958	70.54	1.3274	70.54	69.99	71.318	0					593	151	10	0	0	0	0.00045833	2	34043	51.321
	GQPVAPYNTTQFLMDDHDQEEPDLKTGLYSKR	32	Unmodified	_GQPVAPYNTTQFLMDDHDQEEPDLKTGLYSKR_					0	0	0	2	HEXI1_HUMANProteinHEXIM1	HEXI1_HUMANProteinHEXIM1	HEXI1_HUMANProteinHEXIM1	MULTI-MSMS	FU20160819-08	924.194	4	924.193	3692.74	61642.5	3.1253	0.0028884	-0.35449	-0.00032762	2.7708	0.0025608	924.945	70.182	0.070335	70.182	70.14	70.211	0					21	7	4	0	0	0	0.025685	1	34176	36.202
	GQPVAPYNTTQFLMDDHDQEEPDLKTGLYSKR	32	Unmodified	_GQPVAPYNTTQFLMDDHDQEEPDLKTGLYSKR_					0	0	0	2	HEXI1_HUMANProteinHEXIM1	HEXI1_HUMANProteinHEXIM1	HEXI1_HUMANProteinHEXIM1	MULTI-MSMS	FU20160819-08	616.634	6	616.464	3692.74	76724.5	3.1878	0.0019651	-0.23586	-0.0001454	2.9519	0.0018197	616.798	70.474	0.17313	70.474	70.356	70.529	0					31	15	3	0	0	0	1.1993e-10	2	34393	63.625
	GQPVAPYNTTQFLMDDHDQEEPDLKTGLYSKR	32	Unmodified	_GQPVAPYNTTQFLMDDHDQEEPDLKTGLYSKR_					0	0	0	2	HEXI1_HUMANProteinHEXIM1	HEXI1_HUMANProteinHEXIM1	HEXI1_HUMANProteinHEXIM1	MULTI-MSMS	FU20160819-08	924.696	4	924.193	3692.74	61940.9	3.1766	0.0029358	-0.72477	-0.00066982	2.4518	0.002266	924.693	70.534	1.115	70.534	70.203	71.318	0					317	126	7	0	0	0	0.0011856	1	34511	50.593
	GQPVAPYNTTQFLMDDHDQEEPDLKTGLYSKR	32	Unmodified	_GQPVAPYNTTQFLMDDHDQEEPDLKTGLYSKR_					0	0	0	2	HEXI1_HUMANProteinHEXIM1	HEXI1_HUMANProteinHEXIM1	HEXI1_HUMANProteinHEXIM1	MULTI-MSMS	FU20160819-08	1232.59	3	1231.92	3692.74	54653	2.7281	0.0033608	-0.3379	-0.00041626	2.3902	0.0029445	1232.59	70.704	0.3168	70.704	70.623	70.939	0					165	38	6	0	0	0	1.1778e-13	1	34589	69.578
	GQPVAPYNTTQFLMDDHDQEEPDLKTGLYSKR	32	Unmodified	_GQPVAPYNTTQFLMDDHDQEEPDLKTGLYSKR_					0	0	0	2	HEXI1_HUMANProteinHEXIM1	HEXI1_HUMANProteinHEXIM1	HEXI1_HUMANProteinHEXIM1	MULTI-MSMS	FU20160819-08	924.194	4	924.193	3692.74	61761.9	3.3337	0.003081	-1.9385	-0.0017916	1.3951	0.0012894	924.442	71.613	0.16061	71.613	71.486	71.647	0					78	20	6	0	0	0	0.0069885	1	35163	43.936
	GQPVAPYNTTQFLMDDHDQEEPDLKTGLYSKR	32	Unmodified	_GQPVAPYNTTQFLMDDHDQEEPDLKTGLYSKR_					0	0	0	2	HEXI1_HUMANProteinHEXIM1	HEXI1_HUMANProteinHEXIM1	HEXI1_HUMANProteinHEXIM1	MULTI-MSMS	FU20160819-08	739.759	5	739.556	3692.74	68955.5	1.8575	0.0013737	0.97536	0.00072133	2.8328	0.002095	739.958	71.367	0.37101	71.367	71.285	71.656	0					161	46	7	0	0	0	6.2252e-05	1	35173	56.452
	GQPVAPYNTTQFLMDDHDQEEPDLKTGLYSKR	32	Unmodified	_GQPVAPYNTTQFLMDDHDQEEPDLKTGLYSKR_					0	0	0	2	HEXI1_HUMANProteinHEXIM1	HEXI1_HUMANProteinHEXIM1	HEXI1_HUMANProteinHEXIM1	MULTI-MSMS	FU20160819-08	925.196	4	924.193	3692.74	63109	3.3539	0.0030997	-2.0707	-0.0019137	1.2832	0.0011859	924.692	71.739	0.15974	71.739	71.656	71.816	0					56	19	5	0	0	0	0.016684	1	35271	38.588
	GQPVAPYNTTQFLMDDHDQEEPDLKTGLYSKR	32	Unmodified	_GQPVAPYNTTQFLMDDHDQEEPDLKTGLYSKR_					0	0	0	2	HEXI1_HUMANProteinHEXIM1	HEXI1_HUMANProteinHEXIM1	HEXI1_HUMANProteinHEXIM1	MULTI-MSMS	FU20160819-08	739.96	5	739.556	3692.74	69180.9	1.9905	0.0014721	1.2364	0.00091441	3.2269	0.0023865	739.757	72.285	0.25996	72.285	72.144	72.404	0					67	30	3	0	0	0	1.3419e-05	1	35602	57.222
	GQPVAPYNTTQFLMDDHDQEEPDLKTGLYSKR	32	Unmodified	_GQPVAPYNTTQFLMDDHDQEEPDLKTGLYSKR_					0	0	0	2	HEXI1_HUMANProteinHEXIM1	HEXI1_HUMANProteinHEXIM1	HEXI1_HUMANProteinHEXIM1	MULTI-MSMS	FU20160819-08	739.957	5	739.556	3692.74	67259.4	2.1725	0.0016067	-0.3504	-0.00025914	1.8221	0.0013475	740.157	73.525	0.3822	73.525	73.335	73.717	0					160	42	6	0	0	0	0.00019475	1	36476	54.363
	GQPVAPYNTTQFLMDDHDQEEPDLKTGLYSKR	32	Unmodified	_GQPVAPYNTTQFLMDDHDQEEPDLKTGLYSKR_					0	0	0	2	HEXI1_HUMANProteinHEXIM1	HEXI1_HUMANProteinHEXIM1	HEXI1_HUMANProteinHEXIM1	MULTI-MSMS	FU20160819-08	924.695	4	924.193	3692.74	61631.1	3.5736	0.0033027	-1.9226	-0.0017768	1.651	0.0015258	924.693	73.87	0.33091	73.87	73.708	74.039	0					86	31	5	0	0	0	9.3039e-07	1	36764	60.951
	GQPVAPYNTTQFLMDDHDQEEPDLKTGLYSKR	32	Unmodified	_GQPVAPYNTTQFLMDDHDQEEPDLKTGLYSKR_					0	0	0	2	HEXI1_HUMANProteinHEXIM1	HEXI1_HUMANProteinHEXIM1	HEXI1_HUMANProteinHEXIM1	MULTI-MSMS	FU20160819-08	740.36	5	739.556	3692.74	67259.4	2.1234	0.0015704	0.21237	0.00015706	2.3358	0.0017274	740.157	73.853	0.6548	73.853	73.64	74.295	7.6294e-06					231	63	6	0	0	0	2.615e-14	2	37125	70.051
	GQPVAPYNTTQFLMDDHDQEEPDLKTGLYSKR	32	Unmodified	_GQPVAPYNTTQFLMDDHDQEEPDLKTGLYSKR_					0	0	0	2	HEXI1_HUMANProteinHEXIM1	HEXI1_HUMANProteinHEXIM1	HEXI1_HUMANProteinHEXIM1	MULTI-MSMS	FU20160819-08	924.445	4	924.193	3692.74	61556.2	3.4785	0.0032148	-1.3929	-0.0012873	2.0856	0.0019275	924.443	74.191	0.15043	74.191	74.123	74.274	7.6294e-06					29	14	4	0	0	0	0.0089513	1	37120	42.468
	GQPVAPYNTTQFLMDDHDQEEPDLKTGLYSKR	32	Unmodified	_GQPVAPYNTTQFLMDDHDQEEPDLKTGLYSKR_					0	0	0	2	HEXI1_HUMANProteinHEXIM1	HEXI1_HUMANProteinHEXIM1	HEXI1_HUMANProteinHEXIM1	MULTI-SECPEP	FU20160819-08	617.133	6	616.464	3692.74	74029.2	3.2077	0.0019774	-0.46032	-0.00028377	2.7474	0.0016937	616.798	70.596	0.13226	70.596	70.505	70.637	0					30	16	4	0	0	0	0.034081	1	34549	29.377
	GQPVAPYNTTQFLMDDHDQEEPDLKTGLYSKR	32	Unmodified	_GQPVAPYNTTQFLMDDHDQEEPDLKTGLYSKR_					0	0	0	2	HEXI1_HUMANProteinHEXIM1	HEXI1_HUMANProteinHEXIM1	HEXI1_HUMANProteinHEXIM1	MULTI-SECPEP	FU20160819-08	740.16	5	739.556	3692.74	68053.1	2.0309	0.001502	0.75343	0.0005572	2.7844	0.0020592	739.757	72.504	0.14886	72.504	72.462	72.611	0					28	16	2	0	0	0	0.0035315	1	35773	68.45
	GQPVAPYNTTQFLMDDHDQEEPDLKTGLYSKR	32	Unmodified	_GQPVAPYNTTQFLMDDHDQEEPDLKTGLYSKR_					0	0	0	2	HEXI1_HUMANProteinHEXIM1	HEXI1_HUMANProteinHEXIM1	HEXI1_HUMANProteinHEXIM1	MULTI-SECPEP	FU20160819-08	739.006	5	739.556	3692.74	70146.4	1.1256	0.00083246	2.1888	0.0016188	3.3145	0.0024512	739.958	77.008	0.19005	77.008	76.877	77.067	-7.6294e-06					24	17	2	0	0	0	0.00289	1	39454	47.376
	GQPVAPYNTTQFLMDDHDQEEPDLKTGLYSKR	32	Unmodified	_GQPVAPYNTTQFLMDDHDQEEPDLKTGLYSKR_					0	0	0	2	HEXI1_HUMANProteinHEXIM1	HEXI1_HUMANProteinHEXIM1	HEXI1_HUMANProteinHEXIM1	MULTI-SECPEP	FU20160819-08	739.759	5	739.556	3692.74	71286.6	0.80744	0.00059715	2.0589	0.0015226	2.8663	0.0021198	739.958	78.007	0.23796	78.007	77.848	78.086	0					32	20	3	0	0	0	0.0074195	1	40228	42.828
	GQPVAPYNTTQFLMDDHDQEEPDLKTGLYSKR	32	Unmodified	_GQPVAPYNTTQFLMDDHDQEEPDLKTGLYSKR_					0	0	0	2	HEXI1_HUMANProteinHEXIM1	HEXI1_HUMANProteinHEXIM1	HEXI1_HUMANProteinHEXIM1	MULTI-SECPEP	FU20160819-08	1232.59	3	1231.92	3692.74	54656.3	2.7554	0.0033944	-0.68202	-0.00084019	2.0734	0.0025542	1232.25	70.935	0.14276	70.935	70.879	71.022	-7.6294e-06					56	16	5	0	0	0	3.1211e-05	1	34833	80.117
	GQPVAPYNTTQFLMDDHDQEEPDLKTGLYSKR	32	Unmodified	_GQPVAPYNTTQFLMDDHDQEEPDLKTGLYSKR_					0	0	0	2	HEXI1_HUMANProteinHEXIM1	HEXI1_HUMANProteinHEXIM1	HEXI1_HUMANProteinHEXIM1	MULTI-MSMS	FU20160819-10	739.958	5	739.556	3692.74	73139.6	4.5987	0.003401	-1.2581	-0.00093046	3.3405	0.0024705	739.755	74.118	0.19452	74.118	74.084	74.279	0					41	24	3	0	0	0	0.0032097	1	42018	45.836
165169175	HWKPYYKLTWEEK	13	Unmodified	_HWKPYYKLTWEEK_					0	0	0	2	HEXI1_HUMANProteinHEXIM1	HEXI1_HUMANProteinHEXIM1	HEXI1_HUMANProteinHEXIM1	MULTI-MSMS	FU20160819-07	452.986	4	452.735	1806.91	89271.3	3.0027	0.0013594	-0.64552	-0.00029225	2.3572	0.0010672	452.985	55.147	2.5516	55.147	54.874	57.425	0					1015	321	6	0	0	0	2.5846e-06	7	23455	157.03
	HWKPYYKLTWEEK	13	Unmodified	_HWKPYYKLTWEEK_					0	0	0	2	HEXI1_HUMANProteinHEXIM1	HEXI1_HUMANProteinHEXIM1	HEXI1_HUMANProteinHEXIM1	MULTI-MSMS	FU20160819-07	603.646	3	603.31	1806.91	77619.3	2.8446	0.0017162	-0.062176	-3.7511e-05	2.7825	0.0016787	603.645	55.149	1.3522	55.149	54.874	56.226	-3.8147e-06					507	171	5	0	0	0	1.3624e-30	4	22087	182.71
	HWKPYYKLTWEEK	13	Unmodified	_HWKPYYKLTWEEK_					0	0	0	2	HEXI1_HUMANProteinHEXIM1	HEXI1_HUMANProteinHEXIM1	HEXI1_HUMANProteinHEXIM1	MULTI-MSMS	FU20160819-07	904.464	2	904.462	1806.91	64658.9	2.292	0.002073	0.64439	0.00058283	2.9364	0.0026558	904.964	55.147	0.44415	55.147	54.951	55.395	0					161	56	6	0	0	0	1.6203e-117	2	21913	191.33
	HWKPYYKLTWEEK	13	Unmodified	_HWKPYYKLTWEEK_					0	0	0	2	HEXI1_HUMANProteinHEXIM1	HEXI1_HUMANProteinHEXIM1	HEXI1_HUMANProteinHEXIM1	MULTI-MSMS	FU20160819-07	904.465	2	904.462	1806.91	64658.9	2.3668	0.0021406	0.6864	0.00062082	3.0532	0.0027615	904.964	55.422	0.46944	55.422	55.381	55.85	0					160	59	5	0	0	0	9.0294e-22	1	22301	144.57
	HWKPYYKLTWEEK	13	Unmodified	_HWKPYYKLTWEEK_					0	0	0	2	HEXI1_HUMANProteinHEXIM1	HEXI1_HUMANProteinHEXIM1	HEXI1_HUMANProteinHEXIM1	MULTI-MSMS	FU20160819-07	904.465	2	904.462	1806.91	64570.8	2.445	0.0022114	0.56304	0.00050925	3.008	0.0027207	904.462	55.892	0.32964	55.892	55.841	56.171	0					108	40	5	0	0	0	0.0063581	1	22514	108.9
	HWKPYYKLTWEEK	13	Unmodified	_HWKPYYKLTWEEK_					0	0	0	2	HEXI1_HUMANProteinHEXIM1	HEXI1_HUMANProteinHEXIM1	HEXI1_HUMANProteinHEXIM1	MULTI-MSMS	FU20160819-07	603.313	3	603.31	1806.91	77688.3	3.2103	0.0019368	-0.19559	-0.000118	3.0147	0.0018188	603.645	57.113	0.47718	57.113	56.948	57.425	3.8147e-06					152	59	4	0	0	0	1.9013e-40	2	23209	188.91
	HWKPYYKLTWEEK	13	Unmodified	_HWKPYYKLTWEEK_					0	0	0	2	HEXI1_HUMANProteinHEXIM1	HEXI1_HUMANProteinHEXIM1	HEXI1_HUMANProteinHEXIM1	MULTI-MSMS	FU20160819-07	452.986	4	452.735	1806.91	89549.4	3.4315	0.0015536	-0.94456	-0.00042763	2.487	0.0011259	452.985	57.815	0.49386	57.815	57.425	57.919	0					139	62	3	0	0	0	6.4103e-05	1	23701	134.75
	HWKPYYKLTWEEK	13	Unmodified	_HWKPYYKLTWEEK_					0	0	0	2	HEXI1_HUMANProteinHEXIM1	HEXI1_HUMANProteinHEXIM1	HEXI1_HUMANProteinHEXIM1	MULTI-MSMS	FU20160819-07	603.312	3	603.31	1806.91	77989.1	3.2944	0.0019875	-0.44181	-0.00026655	2.8526	0.001721	603.644	57.643	0.4689	57.643	57.425	57.894	0					142	59	4	0	0	0	2.6901e-17	1	23711	171.26
	HWKPYYKLTWEEK	13	Unmodified	_HWKPYYKLTWEEK_					0	0	0	2	HEXI1_HUMANProteinHEXIM1	HEXI1_HUMANProteinHEXIM1	HEXI1_HUMANProteinHEXIM1	MULTI-MSMS	FU20160819-07	452.986	4	452.735	1806.91	89549.4	3.5033	0.0015861	-1.1253	-0.00050947	2.378	0.0010766	452.985	58.006	0.51035	58.006	57.872	58.383	3.8147e-06					144	63	3	0	0	0	0.00039239	2	23937	130.56
	HWKPYYKLTWEEK	13	Unmodified	_HWKPYYKLTWEEK_					0	0	0	2	HEXI1_HUMANProteinHEXIM1	HEXI1_HUMANProteinHEXIM1	HEXI1_HUMANProteinHEXIM1	MULTI-MSMS	FU20160819-07	603.982	3	603.31	1806.91	77757.4	3.3925	0.0020467	-0.57225	-0.00034524	2.8203	0.0017015	603.644	58.338	0.36117	58.338	58.052	58.413	0					88	44	3	0	0	0	0.0012916	1	24082	145.81
	HWKPYYKLTWEEK	13	Unmodified	_HWKPYYKLTWEEK_					0	0	0	2	HEXI1_HUMANProteinHEXIM1	HEXI1_HUMANProteinHEXIM1	HEXI1_HUMANProteinHEXIM1	MULTI-MSMS	FU20160819-07	452.987	4	452.735	1806.91	89492.9	3.4968	0.0015831	-1.0004	-0.00045291	2.4964	0.0011302	452.985	58.45	0.62619	58.45	58.215	58.841	-3.8147e-06					205	77	4	0	0	0	0.012458	1	24459	93.839
	HWKPYYKLTWEEK	13	Unmodified	_HWKPYYKLTWEEK_					0	0	0	2	HEXI1_HUMANProteinHEXIM1	HEXI1_HUMANProteinHEXIM1	HEXI1_HUMANProteinHEXIM1	MULTI-MSMS	FU20160819-07	452.736	4	452.735	1806.91	89028.4	3.2673	0.0014792	-0.91264	-0.00041318	2.3546	0.001066	452.985	59.292	0.26137	59.292	59.157	59.418	0					66	30	3	0	0	0	0.0157	1	24966	90.434
	HWKPYYKLTWEEK	13	Unmodified	_HWKPYYKLTWEEK_					0	0	0	2	HEXI1_HUMANProteinHEXIM1	HEXI1_HUMANProteinHEXIM1	HEXI1_HUMANProteinHEXIM1	MULTI-MSMS	FU20160819-07	452.736	4	452.735	1806.91	90046.6	3.1529	0.0014274	-0.24926	-0.00011285	2.9036	0.0013146	452.734	59.727	0.25687	59.727	59.565	59.822	0					64	31	3	0	0	0	0.022189	1	25264	85.672
	HWKPYYKLTWEEK	13	Unmodified	_HWKPYYKLTWEEK_					0	0	0	2	HEXI1_HUMANProteinHEXIM1	HEXI1_HUMANProteinHEXIM1	HEXI1_HUMANProteinHEXIM1	MULTI-MSMS	FU20160819-07	603.647	3	603.31	1806.91	78061.6	2.9131	0.0017575	0.17852	0.0001077	3.0916	0.0018652	603.645	60.058	0.19629	60.058	59.933	60.13	0					31	24	2	0	0	0	0.0028022	1	25532	124.6
	HWKPYYKLTWEEK	13	Unmodified	_HWKPYYKLTWEEK_					0	0	0	2	HEXI1_HUMANProteinHEXIM1	HEXI1_HUMANProteinHEXIM1	HEXI1_HUMANProteinHEXIM1	MULTI-MSMS	FU20160819-07	452.735	4	452.735	1806.91	90046.5	3.0337	0.0013735	-0.46901	-0.00021234	2.5647	0.0011611	452.734	60.176	0.31797	60.176	59.97	60.288	-3.8147e-06					99	39	3	0	0	0	0.0002147	1	25548	132.56
	HWKPYYKLTWEEK	13	Unmodified	_HWKPYYKLTWEEK_					0	0	0	2	HEXI1_HUMANProteinHEXIM1	HEXI1_HUMANProteinHEXIM1	HEXI1_HUMANProteinHEXIM1	MULTI-MSMS	FU20160819-07	603.646	3	603.31	1806.91	78061.6	2.8425	0.0017149	-0.59189	-0.0003571	2.2506	0.0013578	603.644	60.219	0.46652	60.219	60.122	60.589	0					92	58	2	0	0	0	0.00063096	1	25836	132.5
	HWKPYYKLTWEEK	13	Unmodified	_HWKPYYKLTWEEK_					0	0	0	2	HEXI1_HUMANProteinHEXIM1	HEXI1_HUMANProteinHEXIM1	HEXI1_HUMANProteinHEXIM1	MULTI-MSMS	FU20160819-07	603.311	3	603.31	1806.91	78359.2	2.698	0.0016277	0.0092726	5.5943e-06	2.7073	0.0016333	603.645	60.857	0.14595	60.857	60.738	60.884	0					35	16	3	0	0	0	8.1287e-09	1	26147	160.22
	HWKPYYKLTWEEK	13	Unmodified	_HWKPYYKLTWEEK_					0	0	0	2	HEXI1_HUMANProteinHEXIM1	HEXI1_HUMANProteinHEXIM1	HEXI1_HUMANProteinHEXIM1	MSMS	FU20160819-07	603.312	3	603.31	1806.91	NaN	NaN	NaN	NaN	NaN	NaN	NaN	NaN	56.644	1	56.644	56.144	57.144	0								0	0	0	2.8268e-31	1	23001	149.41
	HWKPYYKLTWEEK	13	Unmodified	_HWKPYYKLTWEEK_					0	0	0	2	HEXI1_HUMANProteinHEXIM1	HEXI1_HUMANProteinHEXIM1	HEXI1_HUMANProteinHEXIM1	MSMS	FU20160819-07	603.312	3	603.31	1806.91	NaN	NaN	NaN	NaN	NaN	NaN	NaN	NaN	58.003	1	58.003	57.503	58.503	-3.8147e-06								0	0	0	2.0656e-23	1	23950	145.09
	HWKPYYKLTWEEK	13	Unmodified	_HWKPYYKLTWEEK_					0	0	0	2	HEXI1_HUMANProteinHEXIM1	HEXI1_HUMANProteinHEXIM1	HEXI1_HUMANProteinHEXIM1	MULTI-SECPEP	FU20160819-07	452.736	4	452.735	1806.91	89549.4	3.3753	0.0015281	-1.2425	-0.00056254	2.1328	0.0009656	452.985	58.963	0.31556	58.963	58.833	59.149	3.8147e-06					66	38	3	0	0	0	0.0058152	1	24718	106.26
	HWKPYYKLTWEEK	13	Unmodified	_HWKPYYKLTWEEK_					0	0	0	2	HEXI1_HUMANProteinHEXIM1	HEXI1_HUMANProteinHEXIM1	HEXI1_HUMANProteinHEXIM1	MULTI-SECPEP	FU20160819-07	602.975	3	603.31	1806.91	78061.6	2.6616	0.0016057	-0.60758	-0.00036656	2.054	0.0012392	603.644	60.967	0.16386	60.967	60.858	61.022	0					26	17	2	0	0	0	0.013799	1	26224	110.31
	HWKPYYKLTWEEK	13	Unmodified	_HWKPYYKLTWEEK_					0	0	0	2	HEXI1_HUMANProteinHEXIM1	HEXI1_HUMANProteinHEXIM1	HEXI1_HUMANProteinHEXIM1	MULTI-MSMS	FU20160819-08	452.987	4	452.735	1806.91	88704.6	2.0547	0.00093024	0.071539	3.2388e-05	2.1263	0.00096263	452.985	55.096	1.9415	55.096	54.864	56.805	-3.8147e-06					1218	240	6	0	0	0	0.0011938	6	23016	122.18
	HWKPYYKLTWEEK	13	Unmodified	_HWKPYYKLTWEEK_					0	0	0	2	HEXI1_HUMANProteinHEXIM1	HEXI1_HUMANProteinHEXIM1	HEXI1_HUMANProteinHEXIM1	MULTI-MSMS	FU20160819-08	603.646	3	603.31	1806.91	77677	2.607	0.0015728	0.013567	8.1851e-06	2.6205	0.001581	603.645	55.208	1.6617	55.208	54.864	56.526	0					899	205	6	0	0	0	7.2586e-119	4	23610	219.74
	HWKPYYKLTWEEK	13	Unmodified	_HWKPYYKLTWEEK_					0	0	0	2	HEXI1_HUMANProteinHEXIM1	HEXI1_HUMANProteinHEXIM1	HEXI1_HUMANProteinHEXIM1	MULTI-MSMS	FU20160819-08	904.966	2	904.462	1806.91	64459.3	2.6588	0.0024048	0.08553	7.7359e-05	2.7444	0.0024822	904.964	55.108	0.2206	55.108	54.931	55.151	0					96	26	5	0	0	0	3.0873e-16	1	23047	134.38
	HWKPYYKLTWEEK	13	Unmodified	_HWKPYYKLTWEEK_					0	0	0	2	HEXI1_HUMANProteinHEXIM1	HEXI1_HUMANProteinHEXIM1	HEXI1_HUMANProteinHEXIM1	MULTI-MSMS	FU20160819-08	904.464	2	904.462	1806.91	64459.2	2.8345	0.0025637	-0.060785	-5.4978e-05	2.7737	0.0025087	904.963	55.6	0.98123	55.6	55.243	56.225	0					349	122	5	0	0	0	1.0763e-245	3	23239	202
	HWKPYYKLTWEEK	13	Unmodified	_HWKPYYKLTWEEK_					0	0	0	2	HEXI1_HUMANProteinHEXIM1	HEXI1_HUMANProteinHEXIM1	HEXI1_HUMANProteinHEXIM1	MULTI-MSMS	FU20160819-08	452.986	4	452.735	1806.91	88984.7	2.3567	0.0010669	0.0079666	3.6067e-06	2.3646	0.0010705	452.985	56.933	0.91824	56.933	56.734	57.652	3.8147e-06					290	107	4	0	0	0	0.0014326	2	24614	112.84
	HWKPYYKLTWEEK	13	Unmodified	_HWKPYYKLTWEEK_					0	0	0	2	HEXI1_HUMANProteinHEXIM1	HEXI1_HUMANProteinHEXIM1	HEXI1_HUMANProteinHEXIM1	MULTI-MSMS	FU20160819-08	603.647	3	603.31	1806.91	78130.9	2.9014	0.0017505	0.17932	0.00010819	3.0808	0.0018586	603.31	56.936	0.42768	56.936	56.814	57.241	3.8147e-06					116	48	3	0	0	0	2.1147e-53	1	24364	199.4
	HWKPYYKLTWEEK	13	Unmodified	_HWKPYYKLTWEEK_					0	0	0	2	HEXI1_HUMANProteinHEXIM1	HEXI1_HUMANProteinHEXIM1	HEXI1_HUMANProteinHEXIM1	MULTI-MSMS	FU20160819-08	603.569	3	603.31	1806.91	78201.9	2.9184	0.0017607	-0.27526	-0.00016607	2.6431	0.0015946	603.644	57.45	0.36605	57.45	57.339	57.705	0					93	41	4	0	0	0	1.2456e-17	1	24876	173.76
	HWKPYYKLTWEEK	13	Unmodified	_HWKPYYKLTWEEK_					0	0	0	2	HEXI1_HUMANProteinHEXIM1	HEXI1_HUMANProteinHEXIM1	HEXI1_HUMANProteinHEXIM1	MULTI-MSMS	FU20160819-08	603.647	3	603.31	1806.91	77738.4	2.9252	0.0017648	-0.296	-0.00017858	2.6292	0.0015862	603.645	57.729	0.20984	57.729	57.697	57.907	0					39	25	2	0	0	0	0.00063096	1	24916	132.5
	HWKPYYKLTWEEK	13	Unmodified	_HWKPYYKLTWEEK_					0	0	0	2	HEXI1_HUMANProteinHEXIM1	HEXI1_HUMANProteinHEXIM1	HEXI1_HUMANProteinHEXIM1	MULTI-MSMS	FU20160819-08	452.987	4	452.735	1806.91	90104.5	2.3813	0.0010781	0.017878	8.094e-06	2.3992	0.0010862	452.735	57.848	0.28434	57.848	57.689	57.973	0					101	34	4	0	0	0	0.0074203	1	24970	99.732
	HWKPYYKLTWEEK	13	Unmodified	_HWKPYYKLTWEEK_					0	0	0	2	HEXI1_HUMANProteinHEXIM1	HEXI1_HUMANProteinHEXIM1	HEXI1_HUMANProteinHEXIM1	MULTI-MSMS	FU20160819-08	603.312	3	603.31	1806.91	78027.6	2.9342	0.0017702	-0.11549	-6.9676e-05	2.8187	0.0017006	603.645	58.002	0.38658	58.002	57.83	58.217	0					87	44	3	0	0	0	0.00066764	1	25177	138.24
	HWKPYYKLTWEEK	13	Unmodified	_HWKPYYKLTWEEK_					0	0	0	2	HEXI1_HUMANProteinHEXIM1	HEXI1_HUMANProteinHEXIM1	HEXI1_HUMANProteinHEXIM1	MULTI-MSMS	FU20160819-08	452.987	4	452.735	1806.91	89830.6	2.3905	0.0010823	0.068394	3.0965e-05	2.4589	0.0011132	452.734	57.991	0.8957	57.991	57.838	58.734	0					194	106	3	0	0	0	0.0011906	1	25503	122.34
	HWKPYYKLTWEEK	13	Unmodified	_HWKPYYKLTWEEK_					0	0	0	2	HEXI1_HUMANProteinHEXIM1	HEXI1_HUMANProteinHEXIM1	HEXI1_HUMANProteinHEXIM1	MULTI-SECPEP	FU20160819-08	453.236	4	452.735	1806.91	89395.8	2.3991	0.0010861	-0.26561	-0.00012025	2.1335	0.00096589	452.734	60.324	0.3333	60.324	60.074	60.407	0					70	41	2	0	0	0	0.005531	1	26688	104.59
165169175176	HWKPYYKLTWEEKK	14	Unmodified	_HWKPYYKLTWEEKK_					0	0	0	3	HEXI1_HUMANProteinHEXIM1	HEXI1_HUMANProteinHEXIM1	HEXI1_HUMANProteinHEXIM1	MULTI-MSMS	FU20160819-07	485.01	4	484.758	1935	85397.1	3.3428	0.0016204	-0.35094	-0.00017012	2.9919	0.0014503	485.009	46.309	0.86056	46.309	46.148	47.009	0					436	105	6	0	0	0	0.0023705	2	17252	119.25
	HWKPYYKLTWEEKK	14	Unmodified	_HWKPYYKLTWEEKK_					0	0	0	3	HEXI1_HUMANProteinHEXIM1	HEXI1_HUMANProteinHEXIM1	HEXI1_HUMANProteinHEXIM1	MULTI-MSMS	FU20160819-07	485.011	4	484.758	1935	85899.3	2.9657	0.0014376	-0.21031	-0.00010195	2.7554	0.0013357	485.009	47.025	0.33609	47.025	46.955	47.291	0					99	41	3	0	0	0	0.030214	1	17664	117.27
	HWKPYYKLTWEEKK	14	Unmodified	_HWKPYYKLTWEEKK_					0	0	0	3	HEXI1_HUMANProteinHEXIM1	HEXI1_HUMANProteinHEXIM1	HEXI1_HUMANProteinHEXIM1	MULTI-SECPEP	FU20160819-07	646.345	3	646.009	1935	74731.8	3.1101	0.0020092	0.081431	5.2605e-05	3.1916	0.0020618	646.343	46.323	0.72296	46.323	46.171	46.894	0					368	88	7	0	0	0	0.011211	1	17027	117.27
	HWKPYYKLTWEEKK	14	Unmodified	_HWKPYYKLTWEEKK_					0	0	0	3	HEXI1_HUMANProteinHEXIM1	HEXI1_HUMANProteinHEXIM1	HEXI1_HUMANProteinHEXIM1	MULTI-MSMS	FU20160819-08	646.01	3	646.009	1935	75793.3	2.8827	0.0018622	-0.16627	-0.00010741	2.7164	0.0017548	646.343	46.102	0.48013	46.102	45.957	46.437	0					255	56	6	0	0	0	0.013162	2	17840	159.66
	HWKPYYKLTWEEKK	14	Unmodified	_HWKPYYKLTWEEKK_					0	0	0	3	HEXI1_HUMANProteinHEXIM1	HEXI1_HUMANProteinHEXIM1	HEXI1_HUMANProteinHEXIM1	MULTI-MSMS	FU20160819-08	485.01	4	484.758	1935	85420.5	2.1912	0.0010622	0.3809	0.00018464	2.5721	0.0012468	485.009	46.762	0.27553	46.762	46.646	46.921	0					50	30	3	0	0	0	0.017248	1	18058	124.48
	HWKPYYKLTWEEKK	14	Unmodified	_HWKPYYKLTWEEKK_					0	0	0	3	HEXI1_HUMANProteinHEXIM1	HEXI1_HUMANProteinHEXIM1	HEXI1_HUMANProteinHEXIM1	MULTI-MSMS	FU20160819-08	484.76	4	484.758	1935	85700.2	2.0516	0.00099453	0.24048	0.00011658	2.2921	0.0011111	484.758	46.982	0.14754	46.982	46.921	47.069	0					39	18	3	0	0	0	0.0079695	1	18285	131.79
	HWKPYYKLTWEEKK	14	Unmodified	_HWKPYYKLTWEEKK_					0	0	0	3	HEXI1_HUMANProteinHEXIM1	HEXI1_HUMANProteinHEXIM1	HEXI1_HUMANProteinHEXIM1	MULTI-SECPEP	FU20160819-08	646.679	3	646.009	1935	76198.3	2.5875	0.0016715	0.2233	0.00014426	2.8108	0.0018158	646.009	46.575	0.32014	46.575	46.484	46.804	0					54	36	3	0	0	0	3.5427e-49	1	17912	149.57
196	IRAEMFAK	8	Unmodified	_IRAEMFAK_					0	0	0	1	HEXI1_HUMANProteinHEXIM1	HEXI1_HUMANProteinHEXIM1	HEXI1_HUMANProteinHEXIM1	MULTI-SECPEP	FU20160819-05	483.267	2	483.265	964.516	83269.4	2.2797	0.0011017	0.53596	0.00025901	2.8157	0.0013607	483.266	27.31	0.15382	27.31	27.27	27.423	0					76	20	6	0	0	0	0.01665	1	11367	101.43
	IRAEMFAK	8	Unmodified	_IRAEMFAK_					0	0	0	1	HEXI1_HUMANProteinHEXIM1	HEXI1_HUMANProteinHEXIM1	HEXI1_HUMANProteinHEXIM1	MULTI-SECPEP	FU20160819-05	483.266	2	483.265	964.516	87142.4	2.4178	0.0011685	-0.11327	-5.4742e-05	2.3046	0.0011137	483.265	28.846	0.42542	28.846	28.706	29.132	0					99	55	3	0	0	0	0.022874	1	11826	98.629
196221	IRAEMFAKGQPVAPYNTTQFLMDDHDQEEPDLK	33	Unmodified	_IRAEMFAKGQPVAPYNTTQFLMDDHDQEEPDLK_					0	0	0	2	HEXI1_HUMANProteinHEXIM1	HEXI1_HUMANProteinHEXIM1	HEXI1_HUMANProteinHEXIM1	MULTI-MSMS	FU20160819-04	768.171	5	767.768	3833.8	68995.9	3.7984	0.0029163	-0.78627	-0.00060367	3.0121	0.0023126	768.168	75.826	0.23901	75.826	75.674	75.913	-7.6294e-06					49	19	4	0	0	0	5.955e-07	1	39464	59.855
177181	KFDEKQSLR	9	Unmodified	_KFDEKQSLR_					0	0	0	2	HEXI1_HUMANProteinHEXIM1	HEXI1_HUMANProteinHEXIM1	HEXI1_HUMANProteinHEXIM1	MULTI-MSMS	FU20160819-07	575.816	2	575.814	1149.61	78920.6	2.7391	0.0015772	0.081896	4.7157e-05	2.821	0.0016243	575.814	12.691	1.0796	12.691	12.654	13.733	0					260	142	4	0	0	0	0.019969	2	4699	168.26
	KFDEKQSLR	9	Unmodified	_KFDEKQSLR_					0	0	0	2	HEXI1_HUMANProteinHEXIM1	HEXI1_HUMANProteinHEXIM1	HEXI1_HUMANProteinHEXIM1	MSMS	FU20160819-07	575.816	2	575.814	1149.61	NaN	NaN	NaN	NaN	NaN	NaN	NaN	NaN	11.694	1	11.694	11.194	12.194	0								0	0	0	1.626e-22	1	4065	157.99
	KFDEKQSLR	9	Unmodified	_KFDEKQSLR_					0	0	0	2	HEXI1_HUMANProteinHEXIM1	HEXI1_HUMANProteinHEXIM1	HEXI1_HUMANProteinHEXIM1	MSMS	FU20160819-07	575.816	2	575.814	1149.61	NaN	NaN	NaN	NaN	NaN	NaN	NaN	NaN	13.387	1	13.387	12.887	13.887	0								0	0	0	8.8848e-06	1	4978	143.03
	KFDEKQSLR	9	Unmodified	_KFDEKQSLR_					0	0	0	2	HEXI1_HUMANProteinHEXIM1	HEXI1_HUMANProteinHEXIM1	HEXI1_HUMANProteinHEXIM1	MULTI-MSMS	FU20160819-08	575.816	2	575.814	1149.61	77796.2	3.1179	0.0017953	-1.1458	-0.00065975	1.9721	0.0011356	575.814	13.763	0.33165	13.763	13.527	13.859	0					199	42	6	0	0	0	0.024047	1	5076	146.69
	KFDEKQSLR	9	Unmodified	_KFDEKQSLR_					0	0	0	2	HEXI1_HUMANProteinHEXIM1	HEXI1_HUMANProteinHEXIM1	HEXI1_HUMANProteinHEXIM1	MULTI-MSMS	FU20160819-08	575.816	2	575.814	1149.61	77610.8	2.7968	0.0016104	-0.33878	-0.00019507	2.458	0.0014154	575.814	15.245	0.60363	15.245	15.019	15.622	0					334	77	5	0	0	0	5.0671e-07	2	5764	177.3
	KFDEKQSLR	9	Unmodified	_KFDEKQSLR_					0	0	0	2	HEXI1_HUMANProteinHEXIM1	HEXI1_HUMANProteinHEXIM1	HEXI1_HUMANProteinHEXIM1	MULTI-SECPEP	FU20160819-08	575.816	2	575.814	1149.61	77610	2.8658	0.0016502	-0.25099	-0.00014453	2.6148	0.0015057	575.814	14.966	0.27611	14.966	14.758	15.034	9.5367e-07					84	36	4	0	0	0	2.792e-10	1	5569	133.99
176177181	KKFDEKQSLR	10	Unmodified	_KKFDEKQSLR_					0	0	0	3	HEXI1_HUMANProteinHEXIM1	HEXI1_HUMANProteinHEXIM1	HEXI1_HUMANProteinHEXIM1	MULTI-MSMS	FU20160819-07	426.911	3	426.91	1277.71	91486.1	1.6788	0.00071668	0.14749	6.2963e-05	1.8262	0.00077964	426.91	9.7125	1.7295	9.7125	9.5452	11.275	9.5367e-07					867	225	6	0	0	0	1.1019e-17	6	2729	185.33
	KKFDEKQSLR	10	Unmodified	_KKFDEKQSLR_					0	0	0	3	HEXI1_HUMANProteinHEXIM1	HEXI1_HUMANProteinHEXIM1	HEXI1_HUMANProteinHEXIM1	MULTI-MSMS	FU20160819-07	639.864	2	639.862	1277.71	76899.6	1.8002	0.0011519	1.0468	0.00066981	2.847	0.0018217	639.862	9.7204	0.73951	9.7204	9.6145	10.354	-9.5367e-07					318	97	5	0	0	0	3.3862e-117	2	2741	228.64
	KKFDEKQSLR	10	Unmodified	_KKFDEKQSLR_					0	0	0	3	HEXI1_HUMANProteinHEXIM1	HEXI1_HUMANProteinHEXIM1	HEXI1_HUMANProteinHEXIM1	MULTI-MSMS	FU20160819-07	427.245	3	426.91	1277.71	93003.7	2.4431	0.001043	-1.6905	-0.00072168	0.75264	0.00032131	426.909	12.949	0.24859	12.949	12.842	13.091	0					71	34	3	0	0	0	0.013342	1	4779	134.84
	KKFDEKQSLR	10	Unmodified	_KKFDEKQSLR_					0	0	0	3	HEXI1_HUMANProteinHEXIM1	HEXI1_HUMANProteinHEXIM1	HEXI1_HUMANProteinHEXIM1	MULTI-SECPEP	FU20160819-07	427.22	3	426.91	1277.71	93482.7	2.5037	0.0010689	-0.55441	-0.00023668	1.9493	0.00083218	426.91	13.876	0.28772	13.876	13.733	14.021	0					106	36	4	0	0	0	0.030964	1	5289	102.95
	KKFDEKQSLR	10	Unmodified	_KKFDEKQSLR_					0	0	0	3	HEXI1_HUMANProteinHEXIM1	HEXI1_HUMANProteinHEXIM1	HEXI1_HUMANProteinHEXIM1	MULTI-MSMS	FU20160819-08	426.911	3	426.91	1277.71	91197.4	2.7713	0.0011831	-0.75485	-0.00032226	2.0164	0.00086082	426.91	10.586	2.6645	10.586	9.7159	12.38	9.5367e-07					1107	338	6	0	0	0	8.8796e-08	5	3852	175.65
	KKFDEKQSLR	10	Unmodified	_KKFDEKQSLR_					0	0	0	3	HEXI1_HUMANProteinHEXIM1	HEXI1_HUMANProteinHEXIM1	HEXI1_HUMANProteinHEXIM1	MULTI-MSMS	FU20160819-08	639.864	2	639.862	1277.71	76531	2.7789	0.0017781	0.30853	0.00019742	3.0874	0.0019755	639.862	10.359	0.38482	10.359	10.063	10.448	0					116	47	4	0	0	0	0.023765	1	3104	126.03
	KKFDEKQSLR	10	Unmodified	_KKFDEKQSLR_					0	0	0	3	HEXI1_HUMANProteinHEXIM1	HEXI1_HUMANProteinHEXIM1	HEXI1_HUMANProteinHEXIM1	MSMS	FU20160819-08	426.911	3	426.91	1277.71	NaN	NaN	NaN	NaN	NaN	NaN	NaN	NaN	16.807	1	16.807	16.307	17.307	1.9073e-06								0	0	0	0.0054502	1	6892	100.69
	KKFDEKQSLR	10	Unmodified	_KKFDEKQSLR_					0	0	0	3	HEXI1_HUMANProteinHEXIM1	HEXI1_HUMANProteinHEXIM1	HEXI1_HUMANProteinHEXIM1	MSMS	FU20160819-08	426.911	3	426.91	1277.71	NaN	NaN	NaN	NaN	NaN	NaN	NaN	NaN	17.143	1	17.143	16.643	17.643	0								0	0	0	0.0049901	1	7129	103.31
	KKFDEKQSLR	10	Unmodified	_KKFDEKQSLR_					0	0	0	3	HEXI1_HUMANProteinHEXIM1	HEXI1_HUMANProteinHEXIM1	HEXI1_HUMANProteinHEXIM1	MULTI-SECPEP	FU20160819-08	426.97	3	426.91	1277.71	94043.5	2.3274	0.0009936	0.054926	2.3448e-05	2.3823	0.001017	426.91	17.737	0.36058	17.737	17.581	17.942	0					69	45	2	0	0	0	0.018642	1	7442	97.472
	KKFDEKQSLR	10	Unmodified	_KKFDEKQSLR_					0	0	0	3	HEXI1_HUMANProteinHEXIM1	HEXI1_HUMANProteinHEXIM1	HEXI1_HUMANProteinHEXIM1	MULTI-SECPEP	FU20160819-08	426.97	3	426.91	1277.71	94043.5	2.3684	0.0010111	0.27607	0.00011786	2.6444	0.0011289	426.91	17.547	0.2873	17.547	17.363	17.65	0					51	37	2	0	0	0	0.018642	1	7442	97.472
161165169	KRHWKPYYK	9	Unmodified	_KRHWKPYYK_					0	0	0	3	HEXI1_HUMANProteinHEXIM1	HEXI1_HUMANProteinHEXIM1	HEXI1_HUMANProteinHEXIM1	MULTI-SECPEP	FU20160819-04	653.366	2	653.364	1304.71	77107.8	2.0512	0.0013402	0.77251	0.00050473	2.8237	0.0018449	653.365	12.011	0.7274	12.011	11.461	12.188	0					165	102	3	0	0	0	0.026198	1	3924	62.107
	KRHWKPYYK	9	Unmodified	_KRHWKPYYK_					0	0	0	3	HEXI1_HUMANProteinHEXIM1	HEXI1_HUMANProteinHEXIM1	HEXI1_HUMANProteinHEXIM1	MULTI-MSMS	FU20160819-05	435.913	3	435.912	1304.71	93807.2	1.9859	0.00086569	0.46498	0.00020269	2.4509	0.0010684	435.912	12.747	0.35078	12.747	12.613	12.964	0					75	49	2	0	0	0	0.02965	1	4131	143.73
	KRHWKPYYK	9	Unmodified	_KRHWKPYYK_					0	0	0	3	HEXI1_HUMANProteinHEXIM1	HEXI1_HUMANProteinHEXIM1	HEXI1_HUMANProteinHEXIM1	MULTI-SECPEP	FU20160819-05	653.868	2	653.364	1304.71	77419.5	2.7654	0.0018068	0.55898	0.00036522	3.3244	0.002172	653.365	14.879	0.42769	14.879	14.778	15.206	0					154	59	4	0	0	0	1.904e-09	1	5041	120.46
	LGAPAAGGEEEWGQQQR	17	Unmodified	_LGAPAAGGEEEWGQQQR_					0	0	0	0	HEXI1_HUMANProteinHEXIM1	HEXI1_HUMANProteinHEXIM1	HEXI1_HUMANProteinHEXIM1	MULTI-MSMS	FU20160819-04	892.925	2	892.422	1782.83	62202.2	3.1742	0.0028327	0.22609	0.00020176	3.4003	0.0030345	892.422	44.011	0.29041	44.011	43.822	44.112	0					94	38	3	0	0	0	0.015204	1	17425	83.226
	LGAPAAGGEEEWGQQQR	17	Unmodified	_LGAPAAGGEEEWGQQQR_					0	0	0	0	HEXI1_HUMANProteinHEXIM1	HEXI1_HUMANProteinHEXIM1	HEXI1_HUMANProteinHEXIM1	MULTI-MSMS	FU20160819-04	595.285	3	595.283	1782.83	77363	3.2399	0.0019287	-0.25536	-0.00015201	2.9846	0.0017767	595.283	44.495	0.38108	44.495	44.333	44.714	0					223	46	6	0	0	0	1.6325e-264	2	17764	241.41
	LGAPAAGGEEEWGQQQR	17	Unmodified	_LGAPAAGGEEEWGQQQR_					0	0	0	0	HEXI1_HUMANProteinHEXIM1	HEXI1_HUMANProteinHEXIM1	HEXI1_HUMANProteinHEXIM1	MULTI-MSMS	FU20160819-04	892.424	2	892.422	1782.83	63912.5	3.1906	0.0028474	-0.58131	-0.00051877	2.6093	0.0023286	892.421	44.573	0.59128	44.573	44.282	44.873	0					431	74	7	0	0	0	2.1814e-295	1	17937	250.26
	LGAPAAGGEEEWGQQQR	17	Unmodified	_LGAPAAGGEEEWGQQQR_					0	0	0	0	HEXI1_HUMANProteinHEXIM1	HEXI1_HUMANProteinHEXIM1	HEXI1_HUMANProteinHEXIM1	MULTI-MSMS	FU20160819-04	892.424	2	892.422	1782.83	63912.5	3.1944	0.0028507	-0.60349	-0.00053857	2.5909	0.0023122	892.421	45.123	0.92487	45.123	44.815	45.74	0					550	125	7	0	0	0	3.3557e-183	2	18311	232.78
	LGAPAAGGEEEWGQQQR	17	Unmodified	_LGAPAAGGEEEWGQQQR_					0	0	0	0	HEXI1_HUMANProteinHEXIM1	HEXI1_HUMANProteinHEXIM1	HEXI1_HUMANProteinHEXIM1	MULTI-MSMS	FU20160819-04	595.285	3	595.283	1782.83	76765.4	3.2415	0.0019296	-0.28034	-0.00016688	2.9611	0.0017627	595.283	44.973	0.89312	44.973	44.714	45.607	-3.8147e-06					437	120	5	0	0	0	1.9367e-48	1	18145	180.27
	LGAPAAGGEEEWGQQQR	17	Unmodified	_LGAPAAGGEEEWGQQQR_					0	0	0	0	HEXI1_HUMANProteinHEXIM1	HEXI1_HUMANProteinHEXIM1	HEXI1_HUMANProteinHEXIM1	MULTI-MSMS	FU20160819-04	595.285	3	595.283	1782.83	77363	3.2419	0.0019298	-0.44881	-0.00026717	2.7931	0.0016627	595.283	45.419	0.24561	45.419	45.368	45.614	-3.8147e-06					122	33	4	0	0	0	1.1642e-88	1	18347	199.38
	LGAPAAGGEEEWGQQQR	17	Unmodified	_LGAPAAGGEEEWGQQQR_					0	0	0	0	HEXI1_HUMANProteinHEXIM1	HEXI1_HUMANProteinHEXIM1	HEXI1_HUMANProteinHEXIM1	MULTI-MSMS	FU20160819-04	892.424	2	892.422	1782.83	64036.2	3.1978	0.0028538	-0.64528	-0.00057586	2.5525	0.0022779	892.421	45.679	0.16084	45.679	45.579	45.74	0					102	21	5	0	0	0	6.393e-48	1	18474	171.49
	LGAPAAGGEEEWGQQQR	17	Unmodified	_LGAPAAGGEEEWGQQQR_					0	0	0	0	HEXI1_HUMANProteinHEXIM1	HEXI1_HUMANProteinHEXIM1	HEXI1_HUMANProteinHEXIM1	MULTI-MSMS	FU20160819-04	595.285	3	595.283	1782.83	76765.4	3.2602	0.0019407	-0.47294	-0.00028154	2.7873	0.0016592	595.283	45.717	1.1254	45.717	45.607	46.732	-3.8147e-06					684	152	5	0	0	0	3.8783e-235	3	18851	236.05
	LGAPAAGGEEEWGQQQR	17	Unmodified	_LGAPAAGGEEEWGQQQR_					0	0	0	0	HEXI1_HUMANProteinHEXIM1	HEXI1_HUMANProteinHEXIM1	HEXI1_HUMANProteinHEXIM1	MULTI-MSMS	FU20160819-04	892.425	2	892.422	1782.83	63912.5	3.215	0.0028691	-0.70577	-0.00062984	2.5092	0.0022393	892.421	45.759	0.99283	45.759	45.74	46.732	0					843	134	7	0	0	0	4.7024e-139	3	18984	202.18
	LGAPAAGGEEEWGQQQR	17	Unmodified	_LGAPAAGGEEEWGQQQR_					0	0	0	0	HEXI1_HUMANProteinHEXIM1	HEXI1_HUMANProteinHEXIM1	HEXI1_HUMANProteinHEXIM1	MULTI-MSMS	FU20160819-04	595.285	3	595.283	1782.83	77970	3.4347	0.0020446	-0.40518	-0.0002412	3.0295	0.0018034	595.283	46.849	0.55304	46.849	46.732	47.285	0					217	71	5	0	0	0	3.6093e-235	2	19253	236.4
	LGAPAAGGEEEWGQQQR	17	Unmodified	_LGAPAAGGEEEWGQQQR_					0	0	0	0	HEXI1_HUMANProteinHEXIM1	HEXI1_HUMANProteinHEXIM1	HEXI1_HUMANProteinHEXIM1	MULTI-MSMS	FU20160819-04	892.425	2	892.422	1782.83	63974.3	3.3779	0.0030145	-0.2035	-0.00018161	3.1744	0.0028329	892.421	46.845	0.31393	46.845	46.725	47.039	0					204	41	6	0	0	0	6.8391e-27	1	19200	174.42
	LGAPAAGGEEEWGQQQR	17	Unmodified	_LGAPAAGGEEEWGQQQR_					0	0	0	0	HEXI1_HUMANProteinHEXIM1	HEXI1_HUMANProteinHEXIM1	HEXI1_HUMANProteinHEXIM1	MULTI-MSMS	FU20160819-04	892.425	2	892.422	1782.83	64181.9	3.4896	0.0031142	-0.51184	-0.00045678	2.9777	0.0026574	892.923	47.319	0.37196	47.319	47.285	47.657	0					215	46	6	0	0	0	2.4233e-27	1	19401	179.6
	LGAPAAGGEEEWGQQQR	17	Unmodified	_LGAPAAGGEEEWGQQQR_					0	0	0	0	HEXI1_HUMANProteinHEXIM1	HEXI1_HUMANProteinHEXIM1	HEXI1_HUMANProteinHEXIM1	MULTI-MSMS	FU20160819-04	595.285	3	595.283	1782.83	77363	3.52	0.0020954	-0.32406	-0.00019291	3.1959	0.0019025	595.283	47.271	0.62558	47.271	47.032	47.657	0					208	78	4	0	0	0	2.1486e-103	1	19454	204.18
	LGAPAAGGEEEWGQQQR	17	Unmodified	_LGAPAAGGEEEWGQQQR_					0	0	0	0	HEXI1_HUMANProteinHEXIM1	HEXI1_HUMANProteinHEXIM1	HEXI1_HUMANProteinHEXIM1	MULTI-MSMS	FU20160819-04	595.62	3	595.283	1782.83	76618	3.4424	0.0020492	0.13754	8.1878e-05	3.5799	0.0021311	595.283	48.011	0.31372	48.011	47.925	48.239	0					121	38	4	0	0	0	1.1476e-14	1	19787	154.72
	LGAPAAGGEEEWGQQQR	17	Unmodified	_LGAPAAGGEEEWGQQQR_					0	0	0	0	HEXI1_HUMANProteinHEXIM1	HEXI1_HUMANProteinHEXIM1	HEXI1_HUMANProteinHEXIM1	MULTI-MSMS	FU20160819-04	892.424	2	892.422	1782.83	63818.1	3.3111	0.0029549	0.0059416	5.3024e-06	3.3171	0.0029602	892.422	48.294	0.30878	48.294	48.23	48.538	3.8147e-06					140	37	5	0	0	0	3.3732e-11	1	20053	169.89
	LGAPAAGGEEEWGQQQR	17	Unmodified	_LGAPAAGGEEEWGQQQR_					0	0	0	0	HEXI1_HUMANProteinHEXIM1	HEXI1_HUMANProteinHEXIM1	HEXI1_HUMANProteinHEXIM1	MULTI-MSMS	FU20160819-04	595.284	3	595.283	1782.83	77571.7	3.2795	0.0019523	-0.02975	-1.7709e-05	3.2498	0.0019346	595.618	48.63	0.2393	48.63	48.52	48.759	0					74	29	5	0	0	0	1.0639e-09	1	20254	142.95
	LGAPAAGGEEEWGQQQR	17	Unmodified	_LGAPAAGGEEEWGQQQR_					0	0	0	0	HEXI1_HUMANProteinHEXIM1	HEXI1_HUMANProteinHEXIM1	HEXI1_HUMANProteinHEXIM1	MULTI-MSMS	FU20160819-04	892.926	2	892.422	1782.83	63818.1	3.2174	0.0028713	-0.10658	-9.5115e-05	3.1108	0.0027762	892.421	48.68	0.38139	48.68	48.51	48.892	0					172	48	5	0	0	0	1.1328e-19	2	20310	171.49
	LGAPAAGGEEEWGQQQR	17	Unmodified	_LGAPAAGGEEEWGQQQR_					0	0	0	0	HEXI1_HUMANProteinHEXIM1	HEXI1_HUMANProteinHEXIM1	HEXI1_HUMANProteinHEXIM1	MULTI-MSMS	FU20160819-04	892.424	2	892.422	1782.83	63927	3.038	0.0027112	0.0039663	3.5396e-06	3.042	0.0027147	892.923	49.135	0.34859	49.135	48.972	49.32	0					92	40	4	0	0	0	3.7329e-73	1	20563	187.58
	LGAPAAGGEEEWGQQQR	17	Unmodified	_LGAPAAGGEEEWGQQQR_					0	0	0	0	HEXI1_HUMANProteinHEXIM1	HEXI1_HUMANProteinHEXIM1	HEXI1_HUMANProteinHEXIM1	MULTI-MSMS	FU20160819-04	892.926	2	892.422	1782.83	65204.8	2.3474	0.0020949	0.95504	0.00085229	3.3024	0.0029471	892.422	49.913	0.19152	49.913	49.808	50	0					36	24	2	0	0	0	9.0594e-10	1	21060	129.34
	LGAPAAGGEEEWGQQQR	17	Unmodified	_LGAPAAGGEEEWGQQQR_					0	0	0	0	HEXI1_HUMANProteinHEXIM1	HEXI1_HUMANProteinHEXIM1	HEXI1_HUMANProteinHEXIM1	MULTI-MSMS	FU20160819-04	892.425	2	892.422	1782.83	65204.8	1.925	0.0017179	1.0569	0.0009432	2.9819	0.0026611	892.924	50.145	0.28827	50.145	49.977	50.266	-3.8147e-06					59	38	2	0	0	0	1.4602e-10	1	21253	135.1
	LGAPAAGGEEEWGQQQR	17	Unmodified	_LGAPAAGGEEEWGQQQR_					0	0	0	0	HEXI1_HUMANProteinHEXIM1	HEXI1_HUMANProteinHEXIM1	HEXI1_HUMANProteinHEXIM1	MULTI-MSMS	FU20160819-04	892.927	2	892.422	1782.83	65041.4	0.76218	0.00068018	2.1881	0.0019527	2.9503	0.0026329	892.925	50.701	0.37791	50.701	50.526	50.904	0					92	50	3	0	0	0	2.9145e-09	2	21431	146.5
	LGAPAAGGEEEWGQQQR	17	Unmodified	_LGAPAAGGEEEWGQQQR_					0	0	0	0	HEXI1_HUMANProteinHEXIM1	HEXI1_HUMANProteinHEXIM1	HEXI1_HUMANProteinHEXIM1	MULTI-MSMS	FU20160819-04	892.424	2	892.422	1782.83	65041.4	1.0794	0.0009633	1.9937	0.0017792	3.0731	0.0027425	892.424	51.037	0.42118	51.037	50.858	51.28	-3.8147e-06					95	55	3	0	0	0	1.6156e-14	1	21703	160.56
	LGAPAAGGEEEWGQQQR	17	Unmodified	_LGAPAAGGEEEWGQQQR_					0	0	0	0	HEXI1_HUMANProteinHEXIM1	HEXI1_HUMANProteinHEXIM1	HEXI1_HUMANProteinHEXIM1	MULTI-MSMS	FU20160819-04	892.925	2	892.422	1782.83	64859.5	2.5295	0.0022574	0.47559	0.00042442	3.0051	0.0026818	892.923	52.042	0.39001	52.042	51.893	52.283	-3.8147e-06					99	51	3	0	0	0	1.3468e-06	1	22295	122.33
	LGAPAAGGEEEWGQQQR	17	Unmodified	_LGAPAAGGEEEWGQQQR_					0	0	0	0	HEXI1_HUMANProteinHEXIM1	HEXI1_HUMANProteinHEXIM1	HEXI1_HUMANProteinHEXIM1	MULTI-MSMS	FU20160819-04	892.925	2	892.422	1782.83	64626.9	2.5926	0.0023137	0.65968	0.00058871	3.2523	0.0029024	892.924	52.433	0.40544	52.433	52.283	52.689	0					106	51	4	0	0	0	0.027619	1	22757	77.185
	LGAPAAGGEEEWGQQQR	17	Unmodified	_LGAPAAGGEEEWGQQQR_					0	0	0	0	HEXI1_HUMANProteinHEXIM1	HEXI1_HUMANProteinHEXIM1	HEXI1_HUMANProteinHEXIM1	MULTI-MSMS	FU20160819-04	892.424	2	892.422	1782.83	64964.7	2.6881	0.0023989	0.097073	8.663e-05	2.7851	0.0024855	892.923	53.289	0.19611	53.289	53.216	53.412	3.8147e-06					64	24	3	0	0	0	0.002249	1	23205	127.17
	LGAPAAGGEEEWGQQQR	17	Unmodified	_LGAPAAGGEEEWGQQQR_					0	0	0	0	HEXI1_HUMANProteinHEXIM1	HEXI1_HUMANProteinHEXIM1	HEXI1_HUMANProteinHEXIM1	MULTI-MSMS	FU20160819-04	892.976	2	892.422	1782.83	65041.2	3.0158	0.0026913	-0.34328	-0.00030635	2.6725	0.002385	892.421	54.114	0.41764	54.114	53.925	54.343	3.8147e-06					100	52	3	0	0	0	0.0037582	2	23644	92.247
	LGAPAAGGEEEWGQQQR	17	Unmodified	_LGAPAAGGEEEWGQQQR_					0	0	0	0	HEXI1_HUMANProteinHEXIM1	HEXI1_HUMANProteinHEXIM1	HEXI1_HUMANProteinHEXIM1	MULTI-MSMS	FU20160819-04	595.285	3	595.283	1782.83	81456.9	3.5515	0.0021141	-1.032	-0.00061433	2.5195	0.0014998	595.283	55.275	0.094139	55.275	55.249	55.343	0					16	11	2	0	0	0	0.00036158	1	24514	111.81
	LGAPAAGGEEEWGQQQR	17	Unmodified	_LGAPAAGGEEEWGQQQR_					0	0	0	0	HEXI1_HUMANProteinHEXIM1	HEXI1_HUMANProteinHEXIM1	HEXI1_HUMANProteinHEXIM1	MULTI-MSMS	FU20160819-04	892.669	2	892.422	1782.83	63596.5	3.23	0.0028825	-0.64628	-0.00057675	2.5837	0.0023058	892.42	59.774	0.088799	59.774	59.719	59.807	0					12	9	3	0	0	0	3.5529e-06	1	27807	118.61
	LGAPAAGGEEEWGQQQR	17	Unmodified	_LGAPAAGGEEEWGQQQR_					0	0	0	0	HEXI1_HUMANProteinHEXIM1	HEXI1_HUMANProteinHEXIM1	HEXI1_HUMANProteinHEXIM1	MSMS	FU20160819-04	892.424	2	892.422	1782.83	NaN	NaN	NaN	NaN	NaN	NaN	NaN	NaN	48.013	1	48.013	47.513	48.513	0								0	0	0	1.0701e-29	1	19819	145.81
	LGAPAAGGEEEWGQQQR	17	Unmodified	_LGAPAAGGEEEWGQQQR_					0	0	0	0	HEXI1_HUMANProteinHEXIM1	HEXI1_HUMANProteinHEXIM1	HEXI1_HUMANProteinHEXIM1	MSMS	FU20160819-04	892.423	2	892.422	1782.83	NaN	NaN	NaN	NaN	NaN	NaN	NaN	NaN	51.969	1	51.969	51.469	52.469	0								0	0	0	0.0077201	1	22298	104.24
	LGAPAAGGEEEWGQQQR	17	Unmodified	_LGAPAAGGEEEWGQQQR_					0	0	0	0	HEXI1_HUMANProteinHEXIM1	HEXI1_HUMANProteinHEXIM1	HEXI1_HUMANProteinHEXIM1	MSMS	FU20160819-04	595.62	3	595.283	1782.83	NaN	NaN	NaN	NaN	NaN	NaN	NaN	NaN	52.029	1	52.029	51.529	52.529	0								0	0	0	0.017929	1	22337	78.902
	LGAPAAGGEEEWGQQQR	17	Unmodified	_LGAPAAGGEEEWGQQQR_					0	0	0	0	HEXI1_HUMANProteinHEXIM1	HEXI1_HUMANProteinHEXIM1	HEXI1_HUMANProteinHEXIM1	MSMS	FU20160819-04	892.425	2	892.422	1782.83	NaN	NaN	NaN	NaN	NaN	NaN	NaN	NaN	52.31	1	52.31	51.81	52.81	-3.8147e-06								0	0	0	2.8499e-20	1	22521	131.17
	LGAPAAGGEEEWGQQQR	17	Unmodified	_LGAPAAGGEEEWGQQQR_					0	0	0	0	HEXI1_HUMANProteinHEXIM1	HEXI1_HUMANProteinHEXIM1	HEXI1_HUMANProteinHEXIM1	MSMS	FU20160819-04	892.423	2	892.422	1782.83	NaN	NaN	NaN	NaN	NaN	NaN	NaN	NaN	55.229	1	55.229	54.729	55.729	0								0	0	0	0.034056	1	24481	69.03
	LGAPAAGGEEEWGQQQR	17	Unmodified	_LGAPAAGGEEEWGQQQR_					0	0	0	0	HEXI1_HUMANProteinHEXIM1	HEXI1_HUMANProteinHEXIM1	HEXI1_HUMANProteinHEXIM1	MSMS	FU20160819-04	892.425	2	892.422	1782.83	NaN	NaN	NaN	NaN	NaN	NaN	NaN	NaN	55.965	1	55.965	55.465	56.465	0								0	0	0	0.0048969	1	25009	124.21
	LGAPAAGGEEEWGQQQR	17	Unmodified	_LGAPAAGGEEEWGQQQR_					0	0	0	0	HEXI1_HUMANProteinHEXIM1	HEXI1_HUMANProteinHEXIM1	HEXI1_HUMANProteinHEXIM1	MSMS	FU20160819-04	892.426	2	892.422	1782.83	NaN	NaN	NaN	NaN	NaN	NaN	NaN	NaN	57.464	1	57.464	56.964	57.964	-3.8147e-06								0	0	0	0.029002	1	26024	94.402
	LGAPAAGGEEEWGQQQR	17	Unmodified	_LGAPAAGGEEEWGQQQR_					0	0	0	0	HEXI1_HUMANProteinHEXIM1	HEXI1_HUMANProteinHEXIM1	HEXI1_HUMANProteinHEXIM1	MSMS	FU20160819-04	892.425	2	892.422	1782.83	NaN	NaN	NaN	NaN	NaN	NaN	NaN	NaN	57.871	1	57.871	57.371	58.371	0								0	0	0	5.9319e-08	1	26330	128.36
	LGAPAAGGEEEWGQQQR	17	Unmodified	_LGAPAAGGEEEWGQQQR_					0	0	0	0	HEXI1_HUMANProteinHEXIM1	HEXI1_HUMANProteinHEXIM1	HEXI1_HUMANProteinHEXIM1	MSMS	FU20160819-04	892.424	2	892.422	1782.83	NaN	NaN	NaN	NaN	NaN	NaN	NaN	NaN	63.241	1	63.241	62.741	63.741	3.8147e-06								0	0	0	0.0058415	1	29838	108.98
	LGAPAAGGEEEWGQQQR	17	Unmodified	_LGAPAAGGEEEWGQQQR_					0	0	0	0	HEXI1_HUMANProteinHEXIM1	HEXI1_HUMANProteinHEXIM1	HEXI1_HUMANProteinHEXIM1	MULTI-MSMS	FU20160819-05	892.426	2	892.422	1782.83	63096.2	2.8564	0.0025491	0.44832	0.00040009	3.3047	0.0029492	892.923	44.007	0.23483	44.007	43.878	44.113	0					65	31	3	0	0	0	0.002001	1	16881	104.59
	LGAPAAGGEEEWGQQQR	17	Unmodified	_LGAPAAGGEEEWGQQQR_					0	0	0	0	HEXI1_HUMANProteinHEXIM1	HEXI1_HUMANProteinHEXIM1	HEXI1_HUMANProteinHEXIM1	MULTI-MSMS	FU20160819-05	595.285	3	595.283	1782.83	77356.4	2.9306	0.0017445	-0.21245	-0.00012647	2.7182	0.0016181	595.283	44.445	0.51542	44.445	44.289	44.804	0					350	62	6	0	0	0	1.6325e-264	2	17132	241.41
	LGAPAAGGEEEWGQQQR	17	Unmodified	_LGAPAAGGEEEWGQQQR_					0	0	0	0	HEXI1_HUMANProteinHEXIM1	HEXI1_HUMANProteinHEXIM1	HEXI1_HUMANProteinHEXIM1	MULTI-MSMS	FU20160819-05	892.424	2	892.422	1782.83	64657.4	2.6677	0.0023807	-0.32752	-0.00029228	2.3402	0.0020884	892.421	44.444	0.67426	44.444	44.259	44.933	0					490	84	7	0	0	0	2.5803e-120	2	17210	201
	LGAPAAGGEEEWGQQQR	17	Unmodified	_LGAPAAGGEEEWGQQQR_					0	0	0	0	HEXI1_HUMANProteinHEXIM1	HEXI1_HUMANProteinHEXIM1	HEXI1_HUMANProteinHEXIM1	MULTI-MSMS	FU20160819-05	595.285	3	595.283	1782.83	77298.4	3.0224	0.0017992	-0.5039	-0.00029996	2.5185	0.0014992	595.283	45.111	2.375	45.111	44.804	47.179	0					1069	315	5	0	0	0	7.1062e-103	5	17557	201.06
	LGAPAAGGEEEWGQQQR	17	Unmodified	_LGAPAAGGEEEWGQQQR_					0	0	0	0	HEXI1_HUMANProteinHEXIM1	HEXI1_HUMANProteinHEXIM1	HEXI1_HUMANProteinHEXIM1	MULTI-MSMS	FU20160819-05	892.424	2	892.422	1782.83	64842	2.661	0.0023747	-0.47165	-0.00042091	2.1893	0.0019538	892.421	45.164	0.30693	45.164	44.933	45.24	0					122	40	4	0	0	0	5.6883e-87	1	17595	189.24
	LGAPAAGGEEEWGQQQR	17	Unmodified	_LGAPAAGGEEEWGQQQR_					0	0	0	0	HEXI1_HUMANProteinHEXIM1	HEXI1_HUMANProteinHEXIM1	HEXI1_HUMANProteinHEXIM1	MULTI-MSMS	FU20160819-05	892.423	2	892.422	1782.83	64657.3	2.726	0.0024328	-0.50536	-0.00045099	2.2207	0.0019818	892.421	45.308	0.5161	45.308	44.933	45.449	0					225	69	7	0	0	0	6.2802e-61	1	17763	158.25
	LGAPAAGGEEEWGQQQR	17	Unmodified	_LGAPAAGGEEEWGQQQR_					0	0	0	0	HEXI1_HUMANProteinHEXIM1	HEXI1_HUMANProteinHEXIM1	HEXI1_HUMANProteinHEXIM1	MULTI-MSMS	FU20160819-05	892.424	2	892.422	1782.83	64700	2.8379	0.0025326	-0.71596	-0.00063894	2.122	0.0018937	892.421	45.49	1.0742	45.49	45.449	46.524	0					686	142	6	0	0	0	6.9081e-184	3	18287	234.87
	LGAPAAGGEEEWGQQQR	17	Unmodified	_LGAPAAGGEEEWGQQQR_					0	0	0	0	HEXI1_HUMANProteinHEXIM1	HEXI1_HUMANProteinHEXIM1	HEXI1_HUMANProteinHEXIM1	MULTI-MSMS	FU20160819-05	892.926	2	892.422	1782.83	64842	3.1032	0.0027693	-0.18747	-0.0001673	2.9157	0.002602	892.421	46.68	0.34469	46.68	46.502	46.847	3.8147e-06					146	44	6	0	0	0	6.393e-48	1	18472	167.71
	LGAPAAGGEEEWGQQQR	17	Unmodified	_LGAPAAGGEEEWGQQQR_					0	0	0	0	HEXI1_HUMANProteinHEXIM1	HEXI1_HUMANProteinHEXIM1	HEXI1_HUMANProteinHEXIM1	MULTI-MSMS	FU20160819-05	892.424	2	892.422	1782.83	64742.7	2.9772	0.0026569	-0.0073686	-6.5759e-06	2.9699	0.0026504	892.422	47.252	0.92721	47.252	46.758	47.686	0					214	120	5	0	0	0	2.1657e-87	1	18687	201.38
	LGAPAAGGEEEWGQQQR	17	Unmodified	_LGAPAAGGEEEWGQQQR_					0	0	0	0	HEXI1_HUMANProteinHEXIM1	HEXI1_HUMANProteinHEXIM1	HEXI1_HUMANProteinHEXIM1	MULTI-MSMS	FU20160819-05	595.285	3	595.283	1782.83	78067.2	3.1825	0.0018945	-0.13106	-7.8015e-05	3.0515	0.0018165	595.283	47.405	0.26907	47.405	47.279	47.549	0					48	34	2	0	0	0	1.8088e-61	1	18877	184
	LGAPAAGGEEEWGQQQR	17	Unmodified	_LGAPAAGGEEEWGQQQR_					0	0	0	0	HEXI1_HUMANProteinHEXIM1	HEXI1_HUMANProteinHEXIM1	HEXI1_HUMANProteinHEXIM1	MULTI-MSMS	FU20160819-05	892.927	2	892.422	1782.83	63542.1	2.7833	0.0024838	0.13759	0.00012279	2.9209	0.0026066	892.422	47.774	0.32878	47.774	47.671	48	0					158	41	5	0	0	0	2.5697e-11	1	19075	149.69
	LGAPAAGGEEEWGQQQR	17	Unmodified	_LGAPAAGGEEEWGQQQR_					0	0	0	0	HEXI1_HUMANProteinHEXIM1	HEXI1_HUMANProteinHEXIM1	HEXI1_HUMANProteinHEXIM1	MULTI-MSMS	FU20160819-05	595.285	3	595.283	1782.83	77232.7	3.0204	0.001798	-0.1675	-9.971e-05	2.8529	0.0016983	595.283	47.796	0.59926	47.796	47.656	48.256	0					207	77	4	0	0	0	1.0312e-27	1	19127	168
	LGAPAAGGEEEWGQQQR	17	Unmodified	_LGAPAAGGEEEWGQQQR_					0	0	0	0	HEXI1_HUMANProteinHEXIM1	HEXI1_HUMANProteinHEXIM1	HEXI1_HUMANProteinHEXIM1	MULTI-MSMS	FU20160819-05	892.424	2	892.422	1782.83	64030.1	2.7162	0.002424	0.12232	0.00010916	2.8385	0.0025331	892.422	48.215	0.8904	48.215	47.971	48.861	0					334	114	4	0	0	0	6.9081e-184	4	19686	215.77
	LGAPAAGGEEEWGQQQR	17	Unmodified	_LGAPAAGGEEEWGQQQR_					0	0	0	0	HEXI1_HUMANProteinHEXIM1	HEXI1_HUMANProteinHEXIM1	HEXI1_HUMANProteinHEXIM1	MULTI-MSMS	FU20160819-05	595.285	3	595.283	1782.83	77621.7	2.9704	0.0017682	-0.16048	-9.5533e-05	2.8099	0.0016727	595.618	48.373	0.6129	48.373	48.256	48.869	0					185	77	4	0	0	0	1.7668e-14	1	19596	152.88
	LGAPAAGGEEEWGQQQR	17	Unmodified	_LGAPAAGGEEEWGQQQR_					0	0	0	0	HEXI1_HUMANProteinHEXIM1	HEXI1_HUMANProteinHEXIM1	HEXI1_HUMANProteinHEXIM1	MULTI-MSMS	FU20160819-05	595.62	3	595.283	1782.83	77414.4	3.0421	0.0018109	-0.1647	-9.8044e-05	2.8774	0.0017129	595.283	48.931	0.30166	48.931	48.788	49.09	0					87	38	3	0	0	0	1.659e-27	1	19795	166.79
	LGAPAAGGEEEWGQQQR	17	Unmodified	_LGAPAAGGEEEWGQQQR_					0	0	0	0	HEXI1_HUMANProteinHEXIM1	HEXI1_HUMANProteinHEXIM1	HEXI1_HUMANProteinHEXIM1	MULTI-MSMS	FU20160819-05	892.427	2	892.422	1782.83	64048.2	2.8195	0.0025162	0.1211	0.00010807	2.9406	0.0026243	892.422	49.189	0.25502	49.189	49.01	49.265	0					79	28	4	0	0	0	0.005373	1	19951	110.64
	LGAPAAGGEEEWGQQQR	17	Unmodified	_LGAPAAGGEEEWGQQQR_					0	0	0	0	HEXI1_HUMANProteinHEXIM1	HEXI1_HUMANProteinHEXIM1	HEXI1_HUMANProteinHEXIM1	MULTI-MSMS	FU20160819-05	892.423	2	892.422	1782.83	66355.9	1.5923	0.001421	1.2152	0.0010845	2.8075	0.0025054	892.423	50.181	0.27274	50.181	50.044	50.317	0					46	37	2	0	0	0	4.0418e-06	1	20608	114.24
	LGAPAAGGEEEWGQQQR	17	Unmodified	_LGAPAAGGEEEWGQQQR_					0	0	0	0	HEXI1_HUMANProteinHEXIM1	HEXI1_HUMANProteinHEXIM1	HEXI1_HUMANProteinHEXIM1	MULTI-MSMS	FU20160819-05	892.927	2	892.422	1782.83	64659.8	1.0306	0.00091974	1.5418	0.0013759	2.5724	0.0022956	892.924	50.658	0.29298	50.658	50.485	50.778	0					76	40	3	0	0	0	1.7002e-19	1	20878	144.28
	LGAPAAGGEEEWGQQQR	17	Unmodified	_LGAPAAGGEEEWGQQQR_					0	0	0	0	HEXI1_HUMANProteinHEXIM1	HEXI1_HUMANProteinHEXIM1	HEXI1_HUMANProteinHEXIM1	MULTI-MSMS	FU20160819-05	595.285	3	595.283	1782.83	80700.3	1.6201	0.0009644	0.9469	0.00056367	2.567	0.0015281	595.284	51.144	0.086964	51.144	51.104	51.191	0					13	9	2	0	0	0	0.023097	1	21159	67.415
	LGAPAAGGEEEWGQQQR	17	Unmodified	_LGAPAAGGEEEWGQQQR_					0	0	0	0	HEXI1_HUMANProteinHEXIM1	HEXI1_HUMANProteinHEXIM1	HEXI1_HUMANProteinHEXIM1	MULTI-MSMS	FU20160819-05	892.425	2	892.422	1782.83	64800.4	1.5323	0.0013675	1.5238	0.0013598	3.0561	0.0027273	892.423	51.357	0.078518	51.357	51.325	51.403	0					18	10	2	0	0	0	1.483e-09	1	21298	136.7
	LGAPAAGGEEEWGQQQR	17	Unmodified	_LGAPAAGGEEEWGQQQR_					0	0	0	0	HEXI1_HUMANProteinHEXIM1	HEXI1_HUMANProteinHEXIM1	HEXI1_HUMANProteinHEXIM1	MULTI-MSMS	FU20160819-05	595.317	3	595.283	1782.83	89307.9	2.005	0.0011935	0.78209	0.00046557	2.7871	0.0016591	595.284	51.65	0.13751	51.65	51.585	51.723	0					22	17	2	0	0	0	0.011648	1	21420	73.593
	LGAPAAGGEEEWGQQQR	17	Unmodified	_LGAPAAGGEEEWGQQQR_					0	0	0	0	HEXI1_HUMANProteinHEXIM1	HEXI1_HUMANProteinHEXIM1	HEXI1_HUMANProteinHEXIM1	MULTI-MSMS	FU20160819-05	893.425	2	892.422	1782.83	64659.8	2.1592	0.0019269	0.54013	0.00048202	2.6993	0.0024089	892.923	52.164	0.52729	52.164	51.933	52.461	0					134	69	3	0	0	0	3.6368e-09	3	21701	122.55
	LGAPAAGGEEEWGQQQR	17	Unmodified	_LGAPAAGGEEEWGQQQR_					0	0	0	0	HEXI1_HUMANProteinHEXIM1	HEXI1_HUMANProteinHEXIM1	HEXI1_HUMANProteinHEXIM1	MULTI-MSMS	FU20160819-05	892.424	2	892.422	1782.83	64659.8	2.5074	0.0022377	0.49242	0.00043945	2.9999	0.0026771	892.422	53.128	0.33524	53.128	52.949	53.285	3.8147e-06					79	42	3	0	0	0	0.0032755	1	22378	110.64
	LGAPAAGGEEEWGQQQR	17	Unmodified	_LGAPAAGGEEEWGQQQR_					0	0	0	0	HEXI1_HUMANProteinHEXIM1	HEXI1_HUMANProteinHEXIM1	HEXI1_HUMANProteinHEXIM1	MULTI-MSMS	FU20160819-05	892.426	2	892.422	1782.83	64659.7	2.6302	0.0023472	0.38573	0.00034423	3.0159	0.0026915	892.422	53.535	0.27576	53.535	53.418	53.694	0					62	34	3	0	0	0	0.011647	1	22609	94.82
	LGAPAAGGEEEWGQQQR	17	Unmodified	_LGAPAAGGEEEWGQQQR_					0	0	0	0	HEXI1_HUMANProteinHEXIM1	HEXI1_HUMANProteinHEXIM1	HEXI1_HUMANProteinHEXIM1	MULTI-MSMS	FU20160819-05	892.424	2	892.422	1782.83	64659.7	2.674	0.0023864	0.069989	6.246e-05	2.744	0.0024488	892.422	53.782	0.17301	53.782	53.686	53.859	0					44	21	3	0	0	0	2.8689e-06	1	22843	118.87
	LGAPAAGGEEEWGQQQR	17	Unmodified	_LGAPAAGGEEEWGQQQR_					0	0	0	0	HEXI1_HUMANProteinHEXIM1	HEXI1_HUMANProteinHEXIM1	HEXI1_HUMANProteinHEXIM1	MULTI-MSMS	FU20160819-05	892.925	2	892.422	1782.83	66146.8	2.55	0.0022757	0.15239	0.000136	2.7024	0.0024117	892.923	55.574	0.23404	55.574	55.46	55.694	0					54	30	3	0	0	0	3.0552e-06	1	24115	106.26
	LGAPAAGGEEEWGQQQR	17	Unmodified	_LGAPAAGGEEEWGQQQR_					0	0	0	0	HEXI1_HUMANProteinHEXIM1	HEXI1_HUMANProteinHEXIM1	HEXI1_HUMANProteinHEXIM1	MULTI-MSMS	FU20160819-05	892.926	2	892.422	1782.83	65055.6	2.8704	0.0025616	0.57582	0.00051387	3.4463	0.0030755	892.923	58.746	0.19888	58.746	58.637	58.836	0					28	20	2	0	0	0	8.9774e-10	1	26423	138.24
	LGAPAAGGEEEWGQQQR	17	Unmodified	_LGAPAAGGEEEWGQQQR_					0	0	0	0	HEXI1_HUMANProteinHEXIM1	HEXI1_HUMANProteinHEXIM1	HEXI1_HUMANProteinHEXIM1	MULTI-MSMS	FU20160819-05	892.425	2	892.422	1782.83	66524.4	2.9151	0.0026015	-0.070381	-6.281e-05	2.8447	0.0025387	892.422	59.141	0.28072	59.141	58.91	59.191	0					48	33	2	0	0	0	0.018639	1	26740	72.29
	LGAPAAGGEEEWGQQQR	17	Unmodified	_LGAPAAGGEEEWGQQQR_					0	0	0	0	HEXI1_HUMANProteinHEXIM1	HEXI1_HUMANProteinHEXIM1	HEXI1_HUMANProteinHEXIM1	MULTI-MSMS	FU20160819-05	892.424	2	892.422	1782.83	66263.2	2.9511	0.0026336	-0.36739	-0.00032787	2.5837	0.0023057	892.421	59.779	0.27949	59.779	59.55	59.83	-3.8147e-06					51	32	2	0	0	0	0.0044757	1	27142	94.538
	LGAPAAGGEEEWGQQQR	17	Unmodified	_LGAPAAGGEEEWGQQQR_					0	0	0	0	HEXI1_HUMANProteinHEXIM1	HEXI1_HUMANProteinHEXIM1	HEXI1_HUMANProteinHEXIM1	MSMS	FU20160819-05	595.285	3	595.283	1782.83	NaN	NaN	NaN	NaN	NaN	NaN	NaN	NaN	49.427	1	49.428	48.928	49.928	3.8147e-06								0	0	0	1.5062e-118	1	20162	178.23
	LGAPAAGGEEEWGQQQR	17	Unmodified	_LGAPAAGGEEEWGQQQR_					0	0	0	0	HEXI1_HUMANProteinHEXIM1	HEXI1_HUMANProteinHEXIM1	HEXI1_HUMANProteinHEXIM1	MSMS	FU20160819-05	595.619	3	595.283	1782.83	NaN	NaN	NaN	NaN	NaN	NaN	NaN	NaN	49.451	1	49.451	48.951	49.951	-3.8147e-06								0	0	0	5.2776e-14	1	20187	130.95
	LGAPAAGGEEEWGQQQR	17	Unmodified	_LGAPAAGGEEEWGQQQR_					0	0	0	0	HEXI1_HUMANProteinHEXIM1	HEXI1_HUMANProteinHEXIM1	HEXI1_HUMANProteinHEXIM1	MSMS	FU20160819-05	892.425	2	892.422	1782.83	NaN	NaN	NaN	NaN	NaN	NaN	NaN	NaN	51.045	1	51.045	50.545	51.545	0								0	0	0	1.9559e-20	1	21073	140.45
	LGAPAAGGEEEWGQQQR	17	Unmodified	_LGAPAAGGEEEWGQQQR_					0	0	0	0	HEXI1_HUMANProteinHEXIM1	HEXI1_HUMANProteinHEXIM1	HEXI1_HUMANProteinHEXIM1	MSMS	FU20160819-05	892.425	2	892.422	1782.83	NaN	NaN	NaN	NaN	NaN	NaN	NaN	NaN	55.176	1	55.176	54.676	55.676	0								0	0	0	0.0089339	1	23858	99.732
	LGAPAAGGEEEWGQQQR	17	Unmodified	_LGAPAAGGEEEWGQQQR_					0	0	0	0	HEXI1_HUMANProteinHEXIM1	HEXI1_HUMANProteinHEXIM1	HEXI1_HUMANProteinHEXIM1	MSMS	FU20160819-05	892.424	2	892.422	1782.83	NaN	NaN	NaN	NaN	NaN	NaN	NaN	NaN	56.29	1	56.29	55.79	56.79	0								0	0	0	0.023051	1	24617	82.705
	LGAPAAGGEEEWGQQQR	17	Unmodified	_LGAPAAGGEEEWGQQQR_					0	0	0	0	HEXI1_HUMANProteinHEXIM1	HEXI1_HUMANProteinHEXIM1	HEXI1_HUMANProteinHEXIM1	MSMS	FU20160819-05	892.424	2	892.422	1782.83	NaN	NaN	NaN	NaN	NaN	NaN	NaN	NaN	60.376	1	60.376	59.876	60.876	0								0	0	0	0.0046409	1	27724	93.011
	LGAPAAGGEEEWGQQQR	17	Unmodified	_LGAPAAGGEEEWGQQQR_					0	0	0	0	HEXI1_HUMANProteinHEXIM1	HEXI1_HUMANProteinHEXIM1	HEXI1_HUMANProteinHEXIM1	MULTI-SECPEP	FU20160819-05	892.926	2	892.422	1782.83	64941.6	2.801	0.0024997	-0.031575	-2.8178e-05	2.7694	0.0024715	892.422	49.315	0.38534	49.315	49.189	49.574	0					73	44	3	0	0	0	0.00014803	1	20211	108.68
	LGAPAAGGEEEWGQQQR	17	Unmodified	_LGAPAAGGEEEWGQQQR_					0	0	0	0	HEXI1_HUMANProteinHEXIM1	HEXI1_HUMANProteinHEXIM1	HEXI1_HUMANProteinHEXIM1	MULTI-SECPEP	FU20160819-05	892.425	2	892.422	1782.83	64659.8	1.6706	0.0014909	1.095	0.00097721	2.7656	0.0024681	892.924	51.506	0.68828	51.506	51.282	51.97	0					144	92	3	0	0	0	5.5702e-50	1	21492	148.78
	LGAPAAGGEEEWGQQQR	17	Unmodified	_LGAPAAGGEEEWGQQQR_					0	0	0	0	HEXI1_HUMANProteinHEXIM1	HEXI1_HUMANProteinHEXIM1	HEXI1_HUMANProteinHEXIM1	MULTI-MSMS	FU20160819-07	892.424	2	892.422	1782.83	64000.8	3.4677	0.0030946	-1.0571	-0.0009434	2.4105	0.0021512	892.421	45.441	0.21255	45.441	45.304	45.517	0					154	26	7	0	0	0	4.6214e-139	1	16389	218.94
	LGAPAAGGEEEWGQQQR	17	Unmodified	_LGAPAAGGEEEWGQQQR_					0	0	0	0	HEXI1_HUMANProteinHEXIM1	HEXI1_HUMANProteinHEXIM1	HEXI1_HUMANProteinHEXIM1	MULTI-MSMS	FU20160819-07	595.62	3	595.283	1782.83	77988.1	3.9433	0.0023474	-1.2396	-0.00073792	2.7037	0.0016095	595.283	45.496	0.21118	45.496	45.321	45.532	3.8147e-06					126	26	7	0	0	0	2.2144e-139	1	16394	212.03
	LGAPAAGGEEEWGQQQR	17	Unmodified	_LGAPAAGGEEEWGQQQR_					0	0	0	0	HEXI1_HUMANProteinHEXIM1	HEXI1_HUMANProteinHEXIM1	HEXI1_HUMANProteinHEXIM1	MULTI-MSMS	FU20160819-07	892.424	2	892.422	1782.83	64000.9	3.4366	0.0030669	-0.627	-0.00055955	2.8096	0.0025073	892.421	45.546	0.46621	45.546	45.517	45.983	0					362	61	7	0	0	0	4.0807e-61	1	16605	188.27
	LGAPAAGGEEEWGQQQR	17	Unmodified	_LGAPAAGGEEEWGQQQR_					0	0	0	0	HEXI1_HUMANProteinHEXIM1	HEXI1_HUMANProteinHEXIM1	HEXI1_HUMANProteinHEXIM1	MULTI-MSMS	FU20160819-07	595.62	3	595.283	1782.83	77458.6	3.9114	0.0023284	-0.92423	-0.00055018	2.9872	0.0017782	595.283	45.563	0.46621	45.563	45.517	45.983	0					318	61	6	0	0	0	7.9142e-74	1	16608	191.06
	LGAPAAGGEEEWGQQQR	17	Unmodified	_LGAPAAGGEEEWGQQQR_					0	0	0	0	HEXI1_HUMANProteinHEXIM1	HEXI1_HUMANProteinHEXIM1	HEXI1_HUMANProteinHEXIM1	MULTI-MSMS	FU20160819-07	892.926	2	892.422	1782.83	63928.8	3.2339	0.002886	0.41245	0.00036808	3.6464	0.0032541	892.923	46.004	0.10175	46.004	45.983	46.085	0					22	11	2	0	0	0	3.0957e-07	1	16846	131.06
	LGAPAAGGEEEWGQQQR	17	Unmodified	_LGAPAAGGEEEWGQQQR_					0	0	0	0	HEXI1_HUMANProteinHEXIM1	HEXI1_HUMANProteinHEXIM1	HEXI1_HUMANProteinHEXIM1	MULTI-MSMS	FU20160819-07	595.619	3	595.283	1782.83	77988.2	3.6786	0.0021898	-0.4349	-0.00025889	3.2437	0.0019309	595.283	45.997	0.27685	45.997	45.983	46.26	0					68	32	3	0	0	0	1.2553e-06	1	16861	118.52
	LGAPAAGGEEEWGQQQR	17	Unmodified	_LGAPAAGGEEEWGQQQR_					0	0	0	0	HEXI1_HUMANProteinHEXIM1	HEXI1_HUMANProteinHEXIM1	HEXI1_HUMANProteinHEXIM1	MULTI-MSMS	FU20160819-07	892.424	2	892.422	1782.83	67599.2	2.8404	0.0025348	-0.17137	-0.00015293	2.669	0.0023819	892.923	46.798	0.30085	46.798	46.633	46.933	0					59	38	2	0	0	0	9.0594e-10	1	17334	140.14
	LGAPAAGGEEEWGQQQR	17	Unmodified	_LGAPAAGGEEEWGQQQR_					0	0	0	0	HEXI1_HUMANProteinHEXIM1	HEXI1_HUMANProteinHEXIM1	HEXI1_HUMANProteinHEXIM1	MSMS	FU20160819-07	892.423	2	892.422	1782.83	NaN	NaN	NaN	NaN	NaN	NaN	NaN	NaN	50.226	1	50.226	49.726	50.726	0								0	0	0	0.027253	1	19322	73.927
	LGAPAAGGEEEWGQQQR	17	Unmodified	_LGAPAAGGEEEWGQQQR_					0	0	0	0	HEXI1_HUMANProteinHEXIM1	HEXI1_HUMANProteinHEXIM1	HEXI1_HUMANProteinHEXIM1	MSMS	FU20160819-07	892.422	2	892.422	1782.83	NaN	NaN	NaN	NaN	NaN	NaN	NaN	NaN	60.221	1	60.221	59.721	60.721	-3.8147e-06								0	0	0	0.025704	1	25635	85.973
	LGAPAAGGEEEWGQQQR	17	Unmodified	_LGAPAAGGEEEWGQQQR_					0	0	0	0	HEXI1_HUMANProteinHEXIM1	HEXI1_HUMANProteinHEXIM1	HEXI1_HUMANProteinHEXIM1	MULTI-MSMS	FU20160819-08	892.423	2	892.422	1782.83	64847.6	3.2466	0.0028973	-0.92397	-0.00082457	2.3226	0.0020727	892.421	45.34	0.88379	45.34	45.154	46.038	0					523	102	7	0	0	0	0	3	16949	253.42
	LGAPAAGGEEEWGQQQR	17	Unmodified	_LGAPAAGGEEEWGQQQR_					0	0	0	0	HEXI1_HUMANProteinHEXIM1	HEXI1_HUMANProteinHEXIM1	HEXI1_HUMANProteinHEXIM1	MULTI-MSMS	FU20160819-08	595.62	3	595.283	1782.83	77361.4	2.9502	0.0017562	-0.41303	-0.00024587	2.5372	0.0015104	595.617	45.303	0.68831	45.303	45.154	45.842	-3.8147e-06					363	79	6	0	0	0	1.5861e-14	2	16955	153.41
	LGAPAAGGEEEWGQQQR	17	Unmodified	_LGAPAAGGEEEWGQQQR_					0	0	0	0	HEXI1_HUMANProteinHEXIM1	HEXI1_HUMANProteinHEXIM1	HEXI1_HUMANProteinHEXIM1	MSMS	FU20160819-08	892.425	2	892.422	1782.83	NaN	NaN	NaN	NaN	NaN	NaN	NaN	NaN	46.289	1	46.289	45.789	46.789	-3.8147e-06								0	0	0	4.2904e-13	1	17771	112.5
	LGGDDARVRELELELDR	17	Unmodified	_LGGDDARVRELELELDR_					0	0	0	2	HEXI1_HUMANProteinHEXIM1	HEXI1_HUMANProteinHEXIM1	HEXI1_HUMANProteinHEXIM1	MULTI-MSMS	FU20160819-07	490.011	4	489.759	1955.01	87488.3	2.402	0.0011764	0.29259	0.0001433	2.6946	0.0013197	490.01	69.624	0.21033	69.624	69.485	69.695	0					65	19	4	0	0	0	0.022129	1	32454	66.436
	LGGDDARVRELELELDR	17	Unmodified	_LGGDDARVRELELELDR_					0	0	0	2	HEXI1_HUMANProteinHEXIM1	HEXI1_HUMANProteinHEXIM1	HEXI1_HUMANProteinHEXIM1	MULTI-MSMS	FU20160819-08	490.011	4	489.759	1955.01	87941.8	2.5779	0.0012625	-0.18064	-8.8469e-05	2.3972	0.0011741	490.01	69.606	0.32082	69.606	69.442	69.762	0					80	30	5	0	0	0	0.026802	1	33588	63.462
	LRAENLQLLTENELHR	16	Unmodified	_LRAENLQLLTENELHR_					0	0	0	1	HEXI1_HUMANProteinHEXIM1	HEXI1_HUMANProteinHEXIM1	HEXI1_HUMANProteinHEXIM1	MULTI-MSMS	FU20160819-04	488.272	4	488.02	1948.05	86780.6	2.7985	0.0013657	0.36708	0.00017914	3.1656	0.0015449	488.02	59.637	0.25972	59.637	59.539	59.798	3.8147e-06					66	28	4	0	0	0	0.0079009	1	27636	97.2
	LRAENLQLLTENELHR	16	Unmodified	_LRAENLQLLTENELHR_					0	0	0	1	HEXI1_HUMANProteinHEXIM1	HEXI1_HUMANProteinHEXIM1	HEXI1_HUMANProteinHEXIM1	MULTI-MSMS	FU20160819-04	488.523	4	488.02	1948.05	86480	2.9803	0.0014545	-0.12565	-6.1317e-05	2.8547	0.0013932	488.27	62.105	0.20779	62.105	61.932	62.139	0					71	27	3	0	0	0	0.00073597	1	29197	115.38
	LRAENLQLLTENELHR	16	Unmodified	_LRAENLQLLTENELHR_					0	0	0	1	HEXI1_HUMANProteinHEXIM1	HEXI1_HUMANProteinHEXIM1	HEXI1_HUMANProteinHEXIM1	MULTI-MSMS	FU20160819-04	650.359	3	650.357	1948.05	74748	3.128	0.0020343	-0.029381	-1.9108e-05	3.0986	0.0020152	650.357	62.326	0.42297	62.326	61.953	62.376	0					209	54	6	0	0	0	1.8578e-21	1	29223	183.76
	LRAENLQLLTENELHR	16	Unmodified	_LRAENLQLLTENELHR_					0	0	0	1	HEXI1_HUMANProteinHEXIM1	HEXI1_HUMANProteinHEXIM1	HEXI1_HUMANProteinHEXIM1	MULTI-MSMS	FU20160819-04	975.537	2	975.032	1948.05	60723	2.9952	0.0029204	-0.24296	-0.0002369	2.7522	0.0026835	975.533	62.326	0.17046	62.326	62.198	62.369	-3.8147e-06					49	20	3	0	0	0	0	1	29364	269.88
	LRAENLQLLTENELHR	16	Unmodified	_LRAENLQLLTENELHR_					0	0	0	1	HEXI1_HUMANProteinHEXIM1	HEXI1_HUMANProteinHEXIM1	HEXI1_HUMANProteinHEXIM1	MULTI-MSMS	FU20160819-04	650.693	3	650.357	1948.05	74891.6	3.2465	0.0021114	-0.2237	-0.00014548	3.0228	0.0019659	650.691	62.426	0.083939	62.426	62.369	62.453	0					47	10	5	0	0	0	3.208e-07	1	29384	140.49
	LRAENLQLLTENELHR	16	Unmodified	_LRAENLQLLTENELHR_					0	0	0	1	HEXI1_HUMANProteinHEXIM1	HEXI1_HUMANProteinHEXIM1	HEXI1_HUMANProteinHEXIM1	MULTI-MSMS	FU20160819-04	488.272	4	488.02	1948.05	85563.8	3.3911	0.0016549	-0.69391	-0.00033864	2.6972	0.0013163	488.27	62.6	0.17365	62.6	62.453	62.627	3.8147e-06					121	21	7	0	0	0	3.1619e-06	1	29487	132.23
	LRAENLQLLTENELHR	16	Unmodified	_LRAENLQLLTENELHR_					0	0	0	1	HEXI1_HUMANProteinHEXIM1	HEXI1_HUMANProteinHEXIM1	HEXI1_HUMANProteinHEXIM1	MULTI-MSMS	FU20160819-04	975.537	2	975.032	1948.05	60827.4	3.3244	0.0032414	-0.4675	-0.00045582	2.8569	0.0027855	975.533	62.712	0.10972	62.712	62.69	62.8	-3.8147e-06					19	13	3	0	0	0	2.74e-05	1	29555	141.34
	LRAENLQLLTENELHR	16	Unmodified	_LRAENLQLLTENELHR_					0	0	0	1	HEXI1_HUMANProteinHEXIM1	HEXI1_HUMANProteinHEXIM1	HEXI1_HUMANProteinHEXIM1	MULTI-MSMS	FU20160819-04	650.693	3	650.357	1948.05	74891.6	3.4571	0.0022483	-0.17366	-0.00011294	3.2834	0.0021354	650.691	62.666	0.22398	62.666	62.627	62.85	0					79	27	7	0	0	0	1.3407e-07	1	29578	183.75
	LRAENLQLLTENELHR	16	Unmodified	_LRAENLQLLTENELHR_					0	0	0	1	HEXI1_HUMANProteinHEXIM1	HEXI1_HUMANProteinHEXIM1	HEXI1_HUMANProteinHEXIM1	MULTI-MSMS	FU20160819-04	488.272	4	488.02	1948.05	85914	3.5456	0.0017303	-1.1499	-0.00056119	2.3957	0.0011691	488.27	62.943	0.27913	62.943	62.764	63.043	0					88	35	6	0	0	0	0.0020685	1	29676	103.66
	LRAENLQLLTENELHR	16	Unmodified	_LRAENLQLLTENELHR_					0	0	0	1	HEXI1_HUMANProteinHEXIM1	HEXI1_HUMANProteinHEXIM1	HEXI1_HUMANProteinHEXIM1	MULTI-MSMS	FU20160819-04	975.537	2	975.032	1948.05	59591.9	3.4207	0.0033353	0.36358	0.0003545	3.7842	0.0036898	975.534	63.064	0.11795	63.064	63.029	63.147	0					37	13	6	0	0	0	0	1	29724	259.68
	LRAENLQLLTENELHR	16	Unmodified	_LRAENLQLLTENELHR_					0	0	0	1	HEXI1_HUMANProteinHEXIM1	HEXI1_HUMANProteinHEXIM1	HEXI1_HUMANProteinHEXIM1	MULTI-MSMS	FU20160819-04	650.693	3	650.357	1948.05	74604.9	3.5755	0.0023253	0.016276	1.0585e-05	3.5918	0.0023359	650.691	63.097	0.22191	63.097	62.957	63.179	0					79	26	7	0	0	0	3.205e-07	1	29758	151.48
	LRAENLQLLTENELHR	16	Unmodified	_LRAENLQLLTENELHR_					0	0	0	1	HEXI1_HUMANProteinHEXIM1	HEXI1_HUMANProteinHEXIM1	HEXI1_HUMANProteinHEXIM1	MULTI-MSMS	FU20160819-04	488.272	4	488.02	1948.05	85914	3.659	0.0017857	-0.86571	-0.00042248	2.7933	0.0013632	488.019	63.335	0.25313	63.335	63.139	63.393	-3.8147e-06					102	30	6	0	0	0	5.7836e-08	1	29885	156.72
	LRAENLQLLTENELHR	16	Unmodified	_LRAENLQLLTENELHR_					0	0	0	1	HEXI1_HUMANProteinHEXIM1	HEXI1_HUMANProteinHEXIM1	HEXI1_HUMANProteinHEXIM1	MULTI-MSMS	FU20160819-04	650.359	3	650.357	1948.05	74891.5	3.7641	0.002448	-0.98588	-0.00064117	2.7782	0.0018068	650.691	63.731	0.13461	63.731	63.72	63.854	0					77	17	5	0	0	0	4.5334e-42	1	30161	210.67
	LRAENLQLLTENELHR	16	Unmodified	_LRAENLQLLTENELHR_					0	0	0	1	HEXI1_HUMANProteinHEXIM1	HEXI1_HUMANProteinHEXIM1	HEXI1_HUMANProteinHEXIM1	MULTI-MSMS	FU20160819-04	975.537	2	975.032	1948.05	61080.4	3.6161	0.0035258	-1.3776	-0.0013432	2.2385	0.0021826	975.532	63.783	0.022541	63.783	63.765	63.788	0					8	2	4	0	0	0	6.6246e-60	1	30165	188.13
	LRAENLQLLTENELHR	16	Unmodified	_LRAENLQLLTENELHR_					0	0	0	1	HEXI1_HUMANProteinHEXIM1	HEXI1_HUMANProteinHEXIM1	HEXI1_HUMANProteinHEXIM1	MULTI-MSMS	FU20160819-04	488.272	4	488.02	1948.05	86442.9	3.8316	0.0018699	-0.72445	-0.00035355	3.1071	0.0015163	488.27	63.967	0.16697	63.967	63.918	64.084	0					32	18	2	0	0	0	5.6854e-07	1	30280	146.27
	LRAENLQLLTENELHR	16	Unmodified	_LRAENLQLLTENELHR_					0	0	0	1	HEXI1_HUMANProteinHEXIM1	HEXI1_HUMANProteinHEXIM1	HEXI1_HUMANProteinHEXIM1	MULTI-MSMS	FU20160819-04	650.693	3	650.357	1948.05	74891.5	3.8544	0.0025067	-0.51774	-0.00033672	3.3366	0.00217	650.357	64.144	0.22731	64.144	64.084	64.312	0					98	25	5	0	0	0	6.508e-15	1	30371	183.31
	LRAENLQLLTENELHR	16	Unmodified	_LRAENLQLLTENELHR_					0	0	0	1	HEXI1_HUMANProteinHEXIM1	HEXI1_HUMANProteinHEXIM1	HEXI1_HUMANProteinHEXIM1	MULTI-MSMS	FU20160819-04	488.272	4	488.02	1948.05	86267.1	3.7407	0.0018255	-0.74389	-0.00036303	2.9968	0.0014625	488.27	64.316	0.22216	64.316	64.26	64.482	0					85	25	5	0	0	0	0.00041878	1	30526	125.33
	LRAENLQLLTENELHR	16	Unmodified	_LRAENLQLLTENELHR_					0	0	0	1	HEXI1_HUMANProteinHEXIM1	HEXI1_HUMANProteinHEXIM1	HEXI1_HUMANProteinHEXIM1	MULTI-MSMS	FU20160819-04	650.693	3	650.357	1948.05	74891.6	3.6691	0.0023862	0.13538	8.8046e-05	3.8045	0.0024743	650.691	64.41	0.10428	64.41	64.378	64.482	0					33	11	3	0	0	0	7.2107e-07	1	30603	162.79
	LRAENLQLLTENELHR	16	Unmodified	_LRAENLQLLTENELHR_					0	0	0	1	HEXI1_HUMANProteinHEXIM1	HEXI1_HUMANProteinHEXIM1	HEXI1_HUMANProteinHEXIM1	MULTI-MSMS	FU20160819-04	488.021	4	488.02	1948.05	86373.4	3.5572	0.001736	-0.43295	-0.00021129	3.1242	0.0015247	488.019	64.551	0.2722	64.551	64.482	64.754	0					126	29	6	0	0	0	0.0025506	1	30753	105.17
	LRAENLQLLTENELHR	16	Unmodified	_LRAENLQLLTENELHR_					0	0	0	1	HEXI1_HUMANProteinHEXIM1	HEXI1_HUMANProteinHEXIM1	HEXI1_HUMANProteinHEXIM1	MULTI-MSMS	FU20160819-04	650.359	3	650.357	1948.05	74605	3.3868	0.0022026	0.37409	0.00024329	3.7609	0.0024459	650.691	64.812	0.09565	64.812	64.744	64.84	0					40	11	5	0	0	0	5.5599e-41	1	30850	213.69
	LRAENLQLLTENELHR	16	Unmodified	_LRAENLQLLTENELHR_					0	0	0	1	HEXI1_HUMANProteinHEXIM1	HEXI1_HUMANProteinHEXIM1	HEXI1_HUMANProteinHEXIM1	MULTI-MSMS	FU20160819-04	488.021	4	488.02	1948.05	86480	3.3224	0.0016214	-0.021571	-1.0527e-05	3.3008	0.0016108	488.02	64.875	0.22291	64.875	64.84	65.063	0					61	26	3	0	0	0	0.00038443	1	31006	123.63
	LRAENLQLLTENELHR	16	Unmodified	_LRAENLQLLTENELHR_					0	0	0	1	HEXI1_HUMANProteinHEXIM1	HEXI1_HUMANProteinHEXIM1	HEXI1_HUMANProteinHEXIM1	MULTI-MSMS	FU20160819-04	650.693	3	650.357	1948.05	73338.5	3.1504	0.0020489	0.35409	0.00023028	3.5044	0.0022791	650.691	65.159	0.13463	65.159	65.07	65.205	0					54	16	4	0	0	0	9.9866e-07	1	31074	161.94
	LRAENLQLLTENELHR	16	Unmodified	_LRAENLQLLTENELHR_					0	0	0	1	HEXI1_HUMANProteinHEXIM1	HEXI1_HUMANProteinHEXIM1	HEXI1_HUMANProteinHEXIM1	MULTI-MSMS	FU20160819-04	488.021	4	488.02	1948.05	83374.6	3.033	0.0014802	-0.16645	-8.1232e-05	2.8665	0.0013989	488.02	65.344	0.16736	65.344	65.259	65.426	0					57	15	5	0	0	0	0.0028466	1	31252	110.84
	LRAENLQLLTENELHR	16	Unmodified	_LRAENLQLLTENELHR_					0	0	0	1	HEXI1_HUMANProteinHEXIM1	HEXI1_HUMANProteinHEXIM1	HEXI1_HUMANProteinHEXIM1	MULTI-MSMS	FU20160819-04	488.271	4	488.02	1948.05	84550.2	2.8033	0.0013681	0.19311	9.4241e-05	2.9964	0.0014623	488.02	65.845	0.13678	65.845	65.756	65.893	0					31	14	4	0	0	0	1.5078e-05	2	31617	137.39
	LRAENLQLLTENELHR	16	Unmodified	_LRAENLQLLTENELHR_					0	0	0	1	HEXI1_HUMANProteinHEXIM1	HEXI1_HUMANProteinHEXIM1	HEXI1_HUMANProteinHEXIM1	MULTI-MSMS	FU20160819-04	650.695	3	650.357	1948.05	73877.4	2.7923	0.001816	-0.84828	-0.00055168	1.944	0.0012643	650.689	65.845	0.085602	65.845	65.78	65.866	0					25	9	3	0	0	0	3.1026e-07	1	31620	161.94
	LRAENLQLLTENELHR	16	Unmodified	_LRAENLQLLTENELHR_					0	0	0	1	HEXI1_HUMANProteinHEXIM1	HEXI1_HUMANProteinHEXIM1	HEXI1_HUMANProteinHEXIM1	MULTI-MSMS	FU20160819-04	488.522	4	488.02	1948.05	87592.2	2.8031	0.001368	-0.2266	-0.00011058	2.5765	0.0012574	488.27	66.466	0.33025	66.466	66.326	66.656	0					94	39	4	0	0	0	3.1619e-06	2	32088	132.23
	LRAENLQLLTENELHR	16	Unmodified	_LRAENLQLLTENELHR_					0	0	0	1	HEXI1_HUMANProteinHEXIM1	HEXI1_HUMANProteinHEXIM1	HEXI1_HUMANProteinHEXIM1	MULTI-MSMS	FU20160819-04	488.523	4	488.02	1948.05	88570.8	2.0894	0.0010196	0.9271	0.00045244	3.0165	0.0014721	488.02	71.38	0.35994	71.38	71.308	71.668	0					92	44	4	0	0	0	0.001417	1	35506	87.138
	LRAENLQLLTENELHR	16	Unmodified	_LRAENLQLLTENELHR_					0	0	0	1	HEXI1_HUMANProteinHEXIM1	HEXI1_HUMANProteinHEXIM1	HEXI1_HUMANProteinHEXIM1	MULTI-SECPEP	FU20160819-04	488.522	4	488.02	1948.05	85858.4	2.7943	0.0013637	-0.27652	-0.00013495	2.5177	0.0012287	488.019	65.956	0.1913	65.956	65.893	66.084	0					33	23	2	0	0	0	0.0015941	1	31794	103.66
	LRAENLQLLTENELHR	16	Unmodified	_LRAENLQLLTENELHR_					0	0	0	1	HEXI1_HUMANProteinHEXIM1	HEXI1_HUMANProteinHEXIM1	HEXI1_HUMANProteinHEXIM1	MULTI-MSMS	FU20160819-05	650.693	3	650.357	1948.05	75797.7	2.9859	0.0019419	0.072495	4.7147e-05	3.0584	0.0019891	650.357	47.201	0.26327	47.201	47.137	47.4	0					63	33	3	0	0	0	0.0035034	1	18765	97.823
	LRAENLQLLTENELHR	16	Unmodified	_LRAENLQLLTENELHR_					0	0	0	1	HEXI1_HUMANProteinHEXIM1	HEXI1_HUMANProteinHEXIM1	HEXI1_HUMANProteinHEXIM1	MULTI-MSMS	FU20160819-05	488.272	4	488.02	1948.05	89062.3	3.0064	0.0014672	-0.69357	-0.00033848	2.3128	0.0011287	488.27	59.721	0.31574	59.721	59.59	59.906	3.8147e-06					81	37	3	0	0	0	0.029357	1	27164	79.317
	LRAENLQLLTENELHR	16	Unmodified	_LRAENLQLLTENELHR_					0	0	0	1	HEXI1_HUMANProteinHEXIM1	HEXI1_HUMANProteinHEXIM1	HEXI1_HUMANProteinHEXIM1	MULTI-MSMS	FU20160819-05	650.693	3	650.357	1948.05	74434.8	2.5877	0.0016829	-0.017859	-1.1614e-05	2.5698	0.0016713	650.691	62.845	1.07	62.845	62.068	63.138	0					810	146	7	0	0	0	4.9843e-146	4	28973	238.64
	LRAENLQLLTENELHR	16	Unmodified	_LRAENLQLLTENELHR_					0	0	0	1	HEXI1_HUMANProteinHEXIM1	HEXI1_HUMANProteinHEXIM1	HEXI1_HUMANProteinHEXIM1	MULTI-MSMS	FU20160819-05	488.271	4	488.02	1948.05	85793.8	2.6935	0.0013145	-0.45784	-0.00022343	2.2357	0.0010911	488.019	62.846	3.3336	62.846	62.025	65.358	0					1475	443	7	0	0	0	1.5078e-05	9	29027	133.25
	LRAENLQLLTENELHR	16	Unmodified	_LRAENLQLLTENELHR_					0	0	0	1	HEXI1_HUMANProteinHEXIM1	HEXI1_HUMANProteinHEXIM1	HEXI1_HUMANProteinHEXIM1	MULTI-MSMS	FU20160819-05	975.536	2	975.032	1948.05	62909.5	1.8199	0.0017745	0.60856	0.00059337	2.4285	0.0023678	975.032	62.458	0.35669	62.458	62.346	62.703	-3.8147e-06					85	48	2	0	0	0	1.7388e-05	1	28911	143.56
	LRAENLQLLTENELHR	16	Unmodified	_LRAENLQLLTENELHR_					0	0	0	1	HEXI1_HUMANProteinHEXIM1	HEXI1_HUMANProteinHEXIM1	HEXI1_HUMANProteinHEXIM1	MULTI-MSMS	FU20160819-05	976.037	2	975.032	1948.05	62909.5	1.8648	0.0018182	0.48122	0.00046921	2.346	0.0022874	975.534	62.792	0.50025	62.792	62.51	63.01	0					173	67	4	0	0	0	2.4056e-105	1	28975	209.22
	LRAENLQLLTENELHR	16	Unmodified	_LRAENLQLLTENELHR_					0	0	0	1	HEXI1_HUMANProteinHEXIM1	HEXI1_HUMANProteinHEXIM1	HEXI1_HUMANProteinHEXIM1	MULTI-MSMS	FU20160819-05	650.359	3	650.357	1948.05	74271.9	2.6896	0.0017492	-0.21134	-0.00013744	2.4783	0.0016118	650.691	63.207	0.64938	63.207	63.138	63.787	-3.8147e-06					365	86	6	0	0	0	2.0746e-10	1	29274	190.18
	LRAENLQLLTENELHR	16	Unmodified	_LRAENLQLLTENELHR_					0	0	0	1	HEXI1_HUMANProteinHEXIM1	HEXI1_HUMANProteinHEXIM1	HEXI1_HUMANProteinHEXIM1	MULTI-MSMS	FU20160819-05	650.693	3	650.357	1948.05	74271.9	2.6968	0.0017539	-0.042641	-2.7732e-05	2.6542	0.0017262	650.357	63.914	1.9108	63.914	63.78	65.691	0					806	242	4	0	0	0	3.657e-61	5	30175	215.93
	LRAENLQLLTENELHR	16	Unmodified	_LRAENLQLLTENELHR_					0	0	0	1	HEXI1_HUMANProteinHEXIM1	HEXI1_HUMANProteinHEXIM1	HEXI1_HUMANProteinHEXIM1	MULTI-MSMS	FU20160819-05	488.273	4	488.02	1948.05	86434.4	2.2673	0.0011065	0.3166	0.00015451	2.5839	0.001261	488.02	66.024	0.45171	66.024	65.893	66.344	0					70	55	2	0	0	0	0.00022175	1	31408	128.74
	LRAENLQLLTENELHR	16	Unmodified	_LRAENLQLLTENELHR_					0	0	0	1	HEXI1_HUMANProteinHEXIM1	HEXI1_HUMANProteinHEXIM1	HEXI1_HUMANProteinHEXIM1	MULTI-MSMS	FU20160819-05	650.357	3	650.357	1948.05	82901	2.6125	0.0016991	-2.2928	-0.0014911	0.31974	0.00020795	650.689	68.778	0.058723	68.778	68.738	68.797	0					7	6	2	0	0	0	0.0035034	1	32801	97.823
	LRAENLQLLTENELHR	16	Unmodified	_LRAENLQLLTENELHR_					0	0	0	1	HEXI1_HUMANProteinHEXIM1	HEXI1_HUMANProteinHEXIM1	HEXI1_HUMANProteinHEXIM1	MULTI-MSMS	FU20160819-05	488.021	4	488.02	1948.05	88051.9	2.5568	0.0012478	-0.29842	-0.00014563	2.2584	0.0011021	488.27	71.584	0.43363	71.584	71.414	71.848	0					137	54	4	0	0	0	0.0029623	1	35040	102.63
	LRAENLQLLTENELHR	16	Unmodified	_LRAENLQLLTENELHR_					0	0	0	1	HEXI1_HUMANProteinHEXIM1	HEXI1_HUMANProteinHEXIM1	HEXI1_HUMANProteinHEXIM1	MULTI-MSMS	FU20160819-05	488.021	4	488.02	1948.05	NaN	4.1261	0.0020136	-1.4443	-0.00070486	2.6817	0.0013087	488.019	95.2	0.032112	95.2	95.188	95.22	0					6	2	3	0	0	0	0.0025374	1	57048	99.055
	LRAENLQLLTENELHR	16	Unmodified	_LRAENLQLLTENELHR_					0	0	0	1	HEXI1_HUMANProteinHEXIM1	HEXI1_HUMANProteinHEXIM1	HEXI1_HUMANProteinHEXIM1	MULTI-MSMS	FU20160819-05	650.693	3	650.357	1948.05	74538.6	4.6886	0.0030492	1.2972	0.00084365	5.9858	0.0038929	650.358	107.53	0.076416	107.53	107.5	107.58	0					12	5	3	0	0	0	3.1026e-07	1	66655	180.56
	LRAENLQLLTENELHR	16	Unmodified	_LRAENLQLLTENELHR_					0	0	0	1	HEXI1_HUMANProteinHEXIM1	HEXI1_HUMANProteinHEXIM1	HEXI1_HUMANProteinHEXIM1	MSMS	FU20160819-05	975.034	2	975.032	1948.05	NaN	NaN	NaN	NaN	NaN	NaN	NaN	NaN	62.29	1	62.29	61.79	62.79	0								0	0	0	2.429e-07	1	28758	122.97
	LRAENLQLLTENELHR	16	Unmodified	_LRAENLQLLTENELHR_					0	0	0	1	HEXI1_HUMANProteinHEXIM1	HEXI1_HUMANProteinHEXIM1	HEXI1_HUMANProteinHEXIM1	MSMS	FU20160819-05	650.359	3	650.357	1948.05	NaN	NaN	NaN	NaN	NaN	NaN	NaN	NaN	65.91	1	65.91	65.41	66.41	0								0	0	0	2.1934e-11	1	31135	159.14
	LRAENLQLLTENELHR	16	Unmodified	_LRAENLQLLTENELHR_					0	0	0	1	HEXI1_HUMANProteinHEXIM1	HEXI1_HUMANProteinHEXIM1	HEXI1_HUMANProteinHEXIM1	MSMS	FU20160819-05	650.359	3	650.357	1948.05	NaN	NaN	NaN	NaN	NaN	NaN	NaN	NaN	67.121	1	67.121	66.621	67.621	0								0	0	0	1.3189e-17	1	31960	154.81
	LRAENLQLLTENELHR	16	Unmodified	_LRAENLQLLTENELHR_					0	0	0	1	HEXI1_HUMANProteinHEXIM1	HEXI1_HUMANProteinHEXIM1	HEXI1_HUMANProteinHEXIM1	MULTI-MSMS	FU20160819-07	488.272	4	488.02	1948.05	88884.6	3.0942	0.00151	-0.59383	-0.0002898	2.5003	0.0012202	488.27	58.341	0.21416	58.341	58.223	58.437	0					55	26	3	0	0	0	0.028171	1	24188	77.726
	LRAENLQLLTENELHR	16	Unmodified	_LRAENLQLLTENELHR_					0	0	0	1	HEXI1_HUMANProteinHEXIM1	HEXI1_HUMANProteinHEXIM1	HEXI1_HUMANProteinHEXIM1	MULTI-MSMS	FU20160819-07	488.272	4	488.02	1948.05	88555	2.5901	0.001264	0.27946	0.00013638	2.8696	0.0014004	488.27	60.142	0.39288	60.142	59.933	60.326	0					144	49	5	0	0	0	0.0025506	2	25471	113.52
	LRAENLQLLTENELHR	16	Unmodified	_LRAENLQLLTENELHR_					0	0	0	1	HEXI1_HUMANProteinHEXIM1	HEXI1_HUMANProteinHEXIM1	HEXI1_HUMANProteinHEXIM1	MULTI-MSMS	FU20160819-07	650.693	3	650.357	1948.05	76140.9	2.3832	0.00155	0.85027	0.00055298	3.2335	0.0021029	650.692	60.065	0.33154	60.065	59.933	60.265	0					116	41	4	0	0	0	0.0019307	1	25494	99.711
	LRAENLQLLTENELHR	16	Unmodified	_LRAENLQLLTENELHR_					0	0	0	1	HEXI1_HUMANProteinHEXIM1	HEXI1_HUMANProteinHEXIM1	HEXI1_HUMANProteinHEXIM1	MULTI-MSMS	FU20160819-07	488.272	4	488.02	1948.05	86269.9	2.5655	0.001252	-0.084037	-4.1012e-05	2.4815	0.001211	488.27	62.374	0.95378	62.374	61.651	62.604	-3.8147e-06					608	128	5	0	0	0	1.3295e-06	4	27026	144.4
	LRAENLQLLTENELHR	16	Unmodified	_LRAENLQLLTENELHR_					0	0	0	1	HEXI1_HUMANProteinHEXIM1	HEXI1_HUMANProteinHEXIM1	HEXI1_HUMANProteinHEXIM1	MULTI-MSMS	FU20160819-07	650.694	3	650.357	1948.05	74600.4	2.2859	0.0014866	0.59542	0.00038724	2.8813	0.0018739	650.692	61.933	0.33781	61.933	61.636	61.974	0					129	45	3	0	0	0	2.628e-07	1	26717	187
	LRAENLQLLTENELHR	16	Unmodified	_LRAENLQLLTENELHR_					0	0	0	1	HEXI1_HUMANProteinHEXIM1	HEXI1_HUMANProteinHEXIM1	HEXI1_HUMANProteinHEXIM1	MULTI-MSMS	FU20160819-07	975.535	2	975.032	1948.05	62382.9	2.3538	0.002295	-0.012498	-1.2185e-05	2.3413	0.0022828	975.533	61.841	0.11673	61.841	61.771	61.888	3.8147e-06					25	15	2	0	0	0	7.7323e-06	1	26764	131.35
	LRAENLQLLTENELHR	16	Unmodified	_LRAENLQLLTENELHR_					0	0	0	1	HEXI1_HUMANProteinHEXIM1	HEXI1_HUMANProteinHEXIM1	HEXI1_HUMANProteinHEXIM1	MULTI-MSMS	FU20160819-07	650.693	3	650.357	1948.05	74600.4	2.3268	0.0015133	0.45677	0.00029706	2.7836	0.0018103	650.692	62.192	0.25476	62.192	61.974	62.229	0					96	32	3	0	0	0	1.5521e-06	1	26850	160.79
	LRAENLQLLTENELHR	16	Unmodified	_LRAENLQLLTENELHR_					0	0	0	1	HEXI1_HUMANProteinHEXIM1	HEXI1_HUMANProteinHEXIM1	HEXI1_HUMANProteinHEXIM1	MULTI-MSMS	FU20160819-07	975.536	2	975.032	1948.05	62382.9	2.414	0.0023537	0.15408	0.00015023	2.5681	0.002504	975.533	62.192	0.28296	62.192	62.031	62.314	0					109	36	4	0	0	0	3.529e-29	1	26925	173.25
	LRAENLQLLTENELHR	16	Unmodified	_LRAENLQLLTENELHR_					0	0	0	1	HEXI1_HUMANProteinHEXIM1	HEXI1_HUMANProteinHEXIM1	HEXI1_HUMANProteinHEXIM1	MULTI-MSMS	FU20160819-07	650.693	3	650.357	1948.05	74233.5	2.3669	0.0015393	0.35641	0.00023179	2.7233	0.0017711	650.691	62.357	0.79834	62.357	61.677	62.475	3.8147e-06					206	107	4	0	0	0	1.0186e-06	1	27030	167.29
	LRAENLQLLTENELHR	16	Unmodified	_LRAENLQLLTENELHR_					0	0	0	1	HEXI1_HUMANProteinHEXIM1	HEXI1_HUMANProteinHEXIM1	HEXI1_HUMANProteinHEXIM1	MULTI-MSMS	FU20160819-07	975.034	2	975.032	1948.05	62382.9	2.4764	0.0024146	-0.23035	-0.0002246	2.2461	0.00219	975.533	62.508	0.18799	62.508	62.468	62.656	0					46	25	4	0	0	0	5.3927e-74	1	27088	198.81
	LRAENLQLLTENELHR	16	Unmodified	_LRAENLQLLTENELHR_					0	0	0	1	HEXI1_HUMANProteinHEXIM1	HEXI1_HUMANProteinHEXIM1	HEXI1_HUMANProteinHEXIM1	MULTI-MSMS	FU20160819-07	488.271	4	488.02	1948.05	85238.2	2.6611	0.0012987	-0.21905	-0.0001069	2.4421	0.0011918	488.02	62.944	0.48324	62.944	62.604	63.088	0					342	62	7	0	0	0	5.6854e-07	2	27359	146.27
	LRAENLQLLTENELHR	16	Unmodified	_LRAENLQLLTENELHR_					0	0	0	1	HEXI1_HUMANProteinHEXIM1	HEXI1_HUMANProteinHEXIM1	HEXI1_HUMANProteinHEXIM1	MULTI-MSMS	FU20160819-07	650.693	3	650.357	1948.05	74600.4	2.4327	0.0015821	0.30191	0.00019635	2.7346	0.0017784	650.691	62.71	0.25739	62.71	62.604	62.862	-3.8147e-06					177	33	7	0	0	0	1.7078e-74	1	27187	238.83
	LRAENLQLLTENELHR	16	Unmodified	_LRAENLQLLTENELHR_					0	0	0	1	HEXI1_HUMANProteinHEXIM1	HEXI1_HUMANProteinHEXIM1	HEXI1_HUMANProteinHEXIM1	MULTI-MSMS	FU20160819-07	650.693	3	650.357	1948.05	74408.5	2.4642	0.0016026	0.10683	6.9478e-05	2.571	0.0016721	650.691	63.006	0.10716	63.006	62.98	63.088	0					65	11	6	0	0	0	2.5104e-07	1	27364	161.94
	LRAENLQLLTENELHR	16	Unmodified	_LRAENLQLLTENELHR_					0	0	0	1	HEXI1_HUMANProteinHEXIM1	HEXI1_HUMANProteinHEXIM1	HEXI1_HUMANProteinHEXIM1	MULTI-MSMS	FU20160819-07	975.536	2	975.032	1948.05	62313.4	2.5421	0.0024787	-0.21293	-0.00020761	2.3292	0.0022711	975.533	63.097	0.28122	63.097	63.063	63.344	3.8147e-06					79	36	3	0	0	0	9.9979e-125	1	27434	216.54
	LRAENLQLLTENELHR	16	Unmodified	_LRAENLQLLTENELHR_					0	0	0	1	HEXI1_HUMANProteinHEXIM1	HEXI1_HUMANProteinHEXIM1	HEXI1_HUMANProteinHEXIM1	MULTI-MSMS	FU20160819-07	488.271	4	488.02	1948.05	85689.4	2.6758	0.0013058	-0.32264	-0.00015745	2.3531	0.0011484	488.27	63.451	0.81801	63.451	63.08	63.898	0					463	108	6	0	0	0	0.00076653	2	27700	122.12
	LRAENLQLLTENELHR	16	Unmodified	_LRAENLQLLTENELHR_					0	0	0	1	HEXI1_HUMANProteinHEXIM1	HEXI1_HUMANProteinHEXIM1	HEXI1_HUMANProteinHEXIM1	MULTI-MSMS	FU20160819-07	650.693	3	650.357	1948.05	74233.5	2.4651	0.0016032	0.2807	0.00018255	2.7458	0.0017857	650.691	63.508	0.20261	63.508	63.329	63.532	0					95	26	4	0	0	0	4.9031e-50	1	27530	215.37
	LRAENLQLLTENELHR	16	Unmodified	_LRAENLQLLTENELHR_					0	0	0	1	HEXI1_HUMANProteinHEXIM1	HEXI1_HUMANProteinHEXIM1	HEXI1_HUMANProteinHEXIM1	MULTI-MSMS	FU20160819-07	650.693	3	650.357	1948.05	74600.4	2.4651	0.0016032	0.16758	0.00010899	2.6327	0.0017122	650.691	63.703	0.62445	63.703	63.351	63.976	3.8147e-06					293	81	7	0	0	0	4.6117e-05	1	27706	114.01
	LRAENLQLLTENELHR	16	Unmodified	_LRAENLQLLTENELHR_					0	0	0	1	HEXI1_HUMANProteinHEXIM1	HEXI1_HUMANProteinHEXIM1	HEXI1_HUMANProteinHEXIM1	MULTI-MSMS	FU20160819-07	975.536	2	975.032	1948.05	62677.4	2.5427	0.0024792	0.14519	0.00014156	2.6879	0.0026208	975.533	63.761	0.18439	63.761	63.721	63.905	0					32	23	2	0	0	0	4.1251e-05	1	27778	126.1
	LRAENLQLLTENELHR	16	Unmodified	_LRAENLQLLTENELHR_					0	0	0	1	HEXI1_HUMANProteinHEXIM1	HEXI1_HUMANProteinHEXIM1	HEXI1_HUMANProteinHEXIM1	MULTI-MSMS	FU20160819-07	488.272	4	488.02	1948.05	85689.3	2.6771	0.0013065	-0.38054	-0.00018571	2.2966	0.0011208	488.27	64.04	1.1952	64.04	63.898	65.094	0					479	150	6	0	0	0	1.5078e-05	2	27923	128.74
	LRAENLQLLTENELHR	16	Unmodified	_LRAENLQLLTENELHR_					0	0	0	1	HEXI1_HUMANProteinHEXIM1	HEXI1_HUMANProteinHEXIM1	HEXI1_HUMANProteinHEXIM1	MULTI-MSMS	FU20160819-07	650.693	3	650.357	1948.05	74600.4	2.4655	0.0016035	0.14767	9.6037e-05	2.6132	0.0016995	650.691	64.04	0.1901	64.04	63.976	64.166	0					123	22	7	0	0	0	1.6848e-06	1	27945	165.02
	LRAENLQLLTENELHR	16	Unmodified	_LRAENLQLLTENELHR_					0	0	0	1	HEXI1_HUMANProteinHEXIM1	HEXI1_HUMANProteinHEXIM1	HEXI1_HUMANProteinHEXIM1	MULTI-MSMS	FU20160819-07	650.693	3	650.357	1948.05	74408.5	2.4664	0.001604	0.3486	0.00022671	2.815	0.0018307	650.691	64.434	0.33298	64.434	64.337	64.67	0					196	42	6	0	0	0	1.1728e-06	1	28140	171.15
	LRAENLQLLTENELHR	16	Unmodified	_LRAENLQLLTENELHR_					0	0	0	1	HEXI1_HUMANProteinHEXIM1	HEXI1_HUMANProteinHEXIM1	HEXI1_HUMANProteinHEXIM1	MULTI-MSMS	FU20160819-07	650.359	3	650.357	1948.05	74553.7	2.4667	0.0016042	0.61135	0.00039759	3.078	0.0020018	650.692	64.714	0.29842	64.714	64.655	64.954	0					162	37	6	0	0	0	3.7157e-22	1	28357	202.32
	LRAENLQLLTENELHR	16	Unmodified	_LRAENLQLLTENELHR_					0	0	0	1	HEXI1_HUMANProteinHEXIM1	HEXI1_HUMANProteinHEXIM1	HEXI1_HUMANProteinHEXIM1	MULTI-MSMS	FU20160819-07	650.359	3	650.357	1948.05	74673.2	2.4701	0.0016064	0.57145	0.00037164	3.0415	0.0019781	650.357	64.993	0.47484	64.993	64.945	65.42	0					147	56	6	0	0	0	5.0028e-10	1	28579	197.73
	LRAENLQLLTENELHR	16	Unmodified	_LRAENLQLLTENELHR_					0	0	0	1	HEXI1_HUMANProteinHEXIM1	HEXI1_HUMANProteinHEXIM1	HEXI1_HUMANProteinHEXIM1	MULTI-MSMS	FU20160819-07	488.272	4	488.02	1948.05	86415.1	2.714	0.0013245	-0.068414	-3.3387e-05	2.6456	0.0012911	488.27	65.164	0.66615	65.164	65.094	65.76	0					297	80	6	0	0	0	3.1221e-07	1	28871	139.21
	LRAENLQLLTENELHR	16	Unmodified	_LRAENLQLLTENELHR_					0	0	0	1	HEXI1_HUMANProteinHEXIM1	HEXI1_HUMANProteinHEXIM1	HEXI1_HUMANProteinHEXIM1	MULTI-MSMS	FU20160819-07	650.359	3	650.357	1948.05	74600.5	2.5238	0.0016414	0.8793	0.00057186	3.4031	0.0022132	650.358	65.488	0.15466	65.488	65.42	65.574	0					87	19	5	0	0	0	7.2856e-90	1	28875	213.94
	LRAENLQLLTENELHR	16	Unmodified	_LRAENLQLLTENELHR_					0	0	0	1	HEXI1_HUMANProteinHEXIM1	HEXI1_HUMANProteinHEXIM1	HEXI1_HUMANProteinHEXIM1	MULTI-MSMS	FU20160819-07	650.359	3	650.357	1948.05	74600.5	2.5483	0.0016573	0.75414	0.00049046	3.3024	0.0021477	650.357	65.725	0.26359	65.725	65.56	65.824	0					119	31	5	0	0	0	4.1683e-07	1	29140	142.74
	LRAENLQLLTENELHR	16	Unmodified	_LRAENLQLLTENELHR_					0	0	0	1	HEXI1_HUMANProteinHEXIM1	HEXI1_HUMANProteinHEXIM1	HEXI1_HUMANProteinHEXIM1	MULTI-MSMS	FU20160819-07	650.359	3	650.357	1948.05	74233.5	2.5805	0.0016782	0.38188	0.00024836	2.9623	0.0019266	650.692	65.977	0.47754	65.977	65.776	66.254	0					175	58	6	0	0	0	1.9414e-89	1	29429	213.69
	LRAENLQLLTENELHR	16	Unmodified	_LRAENLQLLTENELHR_					0	0	0	1	HEXI1_HUMANProteinHEXIM1	HEXI1_HUMANProteinHEXIM1	HEXI1_HUMANProteinHEXIM1	MULTI-MSMS	FU20160819-07	650.693	3	650.357	1948.05	74600.4	2.6772	0.0017412	0.10775	7.0075e-05	2.785	0.0018112	650.692	66.731	0.4165	66.731	66.589	67.005	0					164	49	5	0	0	0	1.0045e-40	1	29852	185.74
	LRAENLQLLTENELHR	16	Unmodified	_LRAENLQLLTENELHR_					0	0	0	1	HEXI1_HUMANProteinHEXIM1	HEXI1_HUMANProteinHEXIM1	HEXI1_HUMANProteinHEXIM1	MULTI-MSMS	FU20160819-07	488.272	4	488.02	1948.05	86415.1	2.8861	0.0014085	0.14369	7.0124e-05	3.0298	0.0014786	488.27	66.711	0.40885	66.711	66.589	66.998	0					127	48	4	0	0	0	0.010331	1	29858	81.651
	LRAENLQLLTENELHR	16	Unmodified	_LRAENLQLLTENELHR_					0	0	0	1	HEXI1_HUMANProteinHEXIM1	HEXI1_HUMANProteinHEXIM1	HEXI1_HUMANProteinHEXIM1	MULTI-MSMS	FU20160819-07	650.693	3	650.357	1948.05	74600.5	2.7081	0.0017613	0.68238	0.00044379	3.3905	0.0022051	650.692	67.189	0.52933	67.189	66.99	67.52	0					175	56	5	0	0	0	3.1026e-07	2	30522	161.94
	LRAENLQLLTENELHR	16	Unmodified	_LRAENLQLLTENELHR_					0	0	0	1	HEXI1_HUMANProteinHEXIM1	HEXI1_HUMANProteinHEXIM1	HEXI1_HUMANProteinHEXIM1	MULTI-MSMS	FU20160819-07	488.272	4	488.02	1948.05	86560.7	2.9192	0.0014246	0.13097	6.3915e-05	3.0501	0.0014885	488.27	67.197	0.63747	67.197	66.824	67.461	0					207	70	5	0	0	0	1.33e-06	2	30177	148.18
	LRAENLQLLTENELHR	16	Unmodified	_LRAENLQLLTENELHR_					0	0	0	1	HEXI1_HUMANProteinHEXIM1	HEXI1_HUMANProteinHEXIM1	HEXI1_HUMANProteinHEXIM1	MULTI-MSMS	FU20160819-07	650.693	3	650.357	1948.05	74673.2	2.6369	0.0017149	0.30832	0.00020052	2.9452	0.0019154	650.692	67.661	0.43448	67.661	67.461	67.896	0					156	49	4	0	0	0	0.0014772	1	30839	107.73
	LRAENLQLLTENELHR	16	Unmodified	_LRAENLQLLTENELHR_					0	0	0	1	HEXI1_HUMANProteinHEXIM1	HEXI1_HUMANProteinHEXIM1	HEXI1_HUMANProteinHEXIM1	MULTI-MSMS	FU20160819-07	488.021	4	488.02	1948.05	86415	2.851	0.0013914	-0.41539	-0.00020272	2.4356	0.0011886	488.27	67.661	0.41397	67.661	67.461	67.875	0					115	47	4	0	0	0	0.00080942	1	30840	116.87
	LRAENLQLLTENELHR	16	Unmodified	_LRAENLQLLTENELHR_					0	0	0	1	HEXI1_HUMANProteinHEXIM1	HEXI1_HUMANProteinHEXIM1	HEXI1_HUMANProteinHEXIM1	MULTI-MSMS	FU20160819-07	488.271	4	488.02	1948.05	86600.3	2.7758	0.0013547	-0.068738	-3.3546e-05	2.7071	0.0013211	488.27	68.021	0.23894	68.021	67.875	68.114	-7.6294e-06					64	26	4	0	0	0	0.0057404	1	31150	94.007
	LRAENLQLLTENELHR	16	Unmodified	_LRAENLQLLTENELHR_					0	0	0	1	HEXI1_HUMANProteinHEXIM1	HEXI1_HUMANProteinHEXIM1	HEXI1_HUMANProteinHEXIM1	MULTI-MSMS	FU20160819-07	488.522	4	488.02	1948.05	86600.3	2.72	0.0013274	-0.080647	-3.9357e-05	2.6394	0.0012881	488.019	68.286	0.22285	68.286	68.196	68.419	-7.6294e-06					62	25	4	0	0	0	4.7219e-06	1	31336	148.18
	LRAENLQLLTENELHR	16	Unmodified	_LRAENLQLLTENELHR_					0	0	0	1	HEXI1_HUMANProteinHEXIM1	HEXI1_HUMANProteinHEXIM1	HEXI1_HUMANProteinHEXIM1	MULTI-MSMS	FU20160819-07	488.272	4	488.02	1948.05	86600.3	2.6426	0.0012896	-0.58505	-0.00028552	2.0576	0.0010041	488.27	68.636	0.48948	68.636	68.519	69.008	0					75	52	2	0	0	0	0.00026104	1	31678	130.95
	LRAENLQLLTENELHR	16	Unmodified	_LRAENLQLLTENELHR_					0	0	0	1	HEXI1_HUMANProteinHEXIM1	HEXI1_HUMANProteinHEXIM1	HEXI1_HUMANProteinHEXIM1	MULTI-MSMS	FU20160819-07	650.359	3	650.357	1948.05	74233.4	2.4284	0.0015794	-0.24024	-0.00015624	2.1882	0.0014231	650.691	68.629	0.42772	68.629	68.55	68.977	0					114	45	4	0	0	0	0.00026958	1	31767	114.54
	LRAENLQLLTENELHR	16	Unmodified	_LRAENLQLLTENELHR_					0	0	0	1	HEXI1_HUMANProteinHEXIM1	HEXI1_HUMANProteinHEXIM1	HEXI1_HUMANProteinHEXIM1	MULTI-MSMS	FU20160819-07	488.272	4	488.02	1948.05	86269.9	2.5533	0.001246	0.16381	7.9942e-05	2.7171	0.001326	488.02	69.186	0.23175	69.186	69.008	69.24	0					44	23	3	0	0	0	0.0088953	1	32003	97.904
	LRAENLQLLTENELHR	16	Unmodified	_LRAENLQLLTENELHR_					0	0	0	1	HEXI1_HUMANProteinHEXIM1	HEXI1_HUMANProteinHEXIM1	HEXI1_HUMANProteinHEXIM1	MULTI-MSMS	FU20160819-07	650.693	3	650.357	1948.05	77399.4	2.3381	0.0015206	0.56463	0.00036721	2.9027	0.0018878	650.692	69.131	0.14734	69.131	69.076	69.223	0					27	15	3	0	0	0	0.00037284	1	32101	119.92
	LRAENLQLLTENELHR	16	Unmodified	_LRAENLQLLTENELHR_					0	0	0	1	HEXI1_HUMANProteinHEXIM1	HEXI1_HUMANProteinHEXIM1	HEXI1_HUMANProteinHEXIM1	MULTI-MSMS	FU20160819-07	488.272	4	488.02	1948.05	87417.8	2.5038	0.0012219	0.46417	0.00022653	2.968	0.0014484	488.27	69.348	0.2345	69.348	69.24	69.475	0					50	28	3	0	0	0	0.00080942	1	32274	116.87
	LRAENLQLLTENELHR	16	Unmodified	_LRAENLQLLTENELHR_					0	0	0	1	HEXI1_HUMANProteinHEXIM1	HEXI1_HUMANProteinHEXIM1	HEXI1_HUMANProteinHEXIM1	MULTI-MSMS	FU20160819-07	650.359	3	650.357	1948.05	80251	2.167	0.0014093	1.3379	0.00087008	3.5048	0.0022794	650.358	70.041	0.18233	70.041	69.955	70.138	0					34	16	4	0	0	0	2.1013e-21	1	32898	179.9
	LRAENLQLLTENELHR	16	Unmodified	_LRAENLQLLTENELHR_					0	0	0	1	HEXI1_HUMANProteinHEXIM1	HEXI1_HUMANProteinHEXIM1	HEXI1_HUMANProteinHEXIM1	MULTI-MSMS	FU20160819-07	650.693	3	650.357	1948.05	74266.9	2.6203	0.0017041	0.7825	0.0005089	3.4028	0.002213	650.692	77.079	0.063828	77.079	77.035	77.099	0					6	4	2	0	0	0	8.523e-07	1	38199	160.03
	LRAENLQLLTENELHR	16	Unmodified	_LRAENLQLLTENELHR_					0	0	0	1	HEXI1_HUMANProteinHEXIM1	HEXI1_HUMANProteinHEXIM1	HEXI1_HUMANProteinHEXIM1	MULTI-MSMS	FU20160819-07	488.271	4	488.02	1948.05	85929.1	1.6977	0.00082851	0.34884	0.00017024	2.0465	0.00099875	488.27	87.045	0.081093	87.045	87.031	87.113	0					10	7	2	0	0	0	0.00012086	1	47565	121.92
	LRAENLQLLTENELHR	16	Unmodified	_LRAENLQLLTENELHR_					0	0	0	1	HEXI1_HUMANProteinHEXIM1	HEXI1_HUMANProteinHEXIM1	HEXI1_HUMANProteinHEXIM1	MULTI-MSMS	FU20160819-07	650.693	3	650.357	1948.05	75235.3	2.3706	0.0015417	0.58107	0.0003779	2.9517	0.0019196	650.692	95.227	0.064621	95.227	95.216	95.281	0					10	5	3	0	0	0	0.00022723	1	54975	137.39
	LRAENLQLLTENELHR	16	Unmodified	_LRAENLQLLTENELHR_					0	0	0	1	HEXI1_HUMANProteinHEXIM1	HEXI1_HUMANProteinHEXIM1	HEXI1_HUMANProteinHEXIM1	MULTI-MSMS	FU20160819-07	488.021	4	488.02	1948.05	87767.8	2.5835	0.0012608	-0.24162	-0.00011792	2.3418	0.0011429	488.019	95.227	0.075562	95.227	95.216	95.292	0					12	6	3	0	0	0	3.1221e-07	1	54977	139.21
	LRAENLQLLTENELHR	16	Unmodified	_LRAENLQLLTENELHR_					0	0	0	1	HEXI1_HUMANProteinHEXIM1	HEXI1_HUMANProteinHEXIM1	HEXI1_HUMANProteinHEXIM1	MULTI-MSMS	FU20160819-07	650.36	3	650.357	1948.05	73441.4	2.3916	0.0015554	1.5432	0.0010036	3.9347	0.002559	650.358	100.7	0.040733	100.7	100.68	100.72	0					9	3	4	0	0	0	0.00081126	1	60257	93.754
	LRAENLQLLTENELHR	16	Unmodified	_LRAENLQLLTENELHR_					0	0	0	1	HEXI1_HUMANProteinHEXIM1	HEXI1_HUMANProteinHEXIM1	HEXI1_HUMANProteinHEXIM1	MULTI-MSMS	FU20160819-07	488.272	4	488.02	1948.05	87397.1	2.6022	0.0012699	0.30695	0.0001498	2.9092	0.0014197	488.27	100.7	0.064453	100.7	100.68	100.75	0					15	6	4	0	0	0	0.0049324	1	60259	87.138
	LRAENLQLLTENELHR	16	Unmodified	_LRAENLQLLTENELHR_					0	0	0	1	HEXI1_HUMANProteinHEXIM1	HEXI1_HUMANProteinHEXIM1	HEXI1_HUMANProteinHEXIM1	MULTI-MSMS	FU20160819-07	488.271	4	488.02	1948.05	86901.2	2.5926	0.0012652	0.36276	0.00017703	2.9554	0.0014423	488.27	104.16	0.078651	104.16	104.12	104.2	0					15	5	4	0	0	0	0.0063597	1	63248	101.42
	LRAENLQLLTENELHR	16	Unmodified	_LRAENLQLLTENELHR_					0	0	0	1	HEXI1_HUMANProteinHEXIM1	HEXI1_HUMANProteinHEXIM1	HEXI1_HUMANProteinHEXIM1	MULTI-SECPEP	FU20160819-07	651.021	3	650.357	1948.05	74673.3	2.5037	0.0016283	0.83115	0.00054055	3.3349	0.0021688	650.358	68.288	0.36293	68.288	68.187	68.55	0					59	43	2	0	0	0	0.017459	1	31510	96.773
	LRAENLQLLTENELHR	16	Unmodified	_LRAENLQLLTENELHR_					0	0	0	1	HEXI1_HUMANProteinHEXIM1	HEXI1_HUMANProteinHEXIM1	HEXI1_HUMANProteinHEXIM1	MULTI-SECPEP	FU20160819-07	650.693	3	650.357	1948.05	76031.5	2.2488	0.0014625	1.0162	0.00066091	3.265	0.0021234	650.357	69.538	0.2546	69.538	69.448	69.703	0					49	24	3	0	0	0	0.027564	1	32396	94.454
	LRAENLQLLTENELHR	16	Unmodified	_LRAENLQLLTENELHR_					0	0	0	1	HEXI1_HUMANProteinHEXIM1	HEXI1_HUMANProteinHEXIM1	HEXI1_HUMANProteinHEXIM1	MULTI-MSMS	FU20160819-08	488.272	4	488.02	1948.05	89034.9	0.74865	0.00036536	2.0322	0.00099177	2.7809	0.0013571	488.02	51.304	0.1593	51.304	51.209	51.368	0					30	17	3	0	0	0	0.010439	1	20983	68.413
	LRAENLQLLTENELHR	16	Unmodified	_LRAENLQLLTENELHR_					0	0	0	1	HEXI1_HUMANProteinHEXIM1	HEXI1_HUMANProteinHEXIM1	HEXI1_HUMANProteinHEXIM1	MULTI-MSMS	FU20160819-08	488.272	4	488.02	1948.05	87842.9	2.5808	0.0012595	0.16062	7.8385e-05	2.7414	0.0013379	488.02	60.05	0.33674	60.05	59.931	60.268	3.8147e-06					112	41	5	0	0	0	0.01201	1	26612	84.62
	LRAENLQLLTENELHR	16	Unmodified	_LRAENLQLLTENELHR_					0	0	0	1	HEXI1_HUMANProteinHEXIM1	HEXI1_HUMANProteinHEXIM1	HEXI1_HUMANProteinHEXIM1	MULTI-MSMS	FU20160819-08	650.694	3	650.357	1948.05	74408.1	2.4856	0.0016166	0.16389	0.00010659	2.6495	0.0017231	650.691	61.932	0.21196	61.932	61.788	62	0					106	26	5	0	0	0	1.739e-52	1	27875	181.69
	LRAENLQLLTENELHR	16	Unmodified	_LRAENLQLLTENELHR_					0	0	0	1	HEXI1_HUMANProteinHEXIM1	HEXI1_HUMANProteinHEXIM1	HEXI1_HUMANProteinHEXIM1	MULTI-MSMS	FU20160819-08	488.021	4	488.02	1948.05	85957.9	2.2569	0.0011014	0.011972	5.8425e-06	2.2689	0.0011072	488.02	62.181	0.24126	62.181	62.087	62.328	0					187	31	7	0	0	0	4.7269e-05	1	27999	127.66
	LRAENLQLLTENELHR	16	Unmodified	_LRAENLQLLTENELHR_					0	0	0	1	HEXI1_HUMANProteinHEXIM1	HEXI1_HUMANProteinHEXIM1	HEXI1_HUMANProteinHEXIM1	MULTI-MSMS	FU20160819-08	975.535	2	975.032	1948.05	62298.9	2.6707	0.002604	-0.41859	-0.00040814	2.2521	0.0021958	975.533	62.139	0.14822	62.139	62.094	62.242	0					32	19	2	0	0	0	3.236e-20	1	28027	164.92
	LRAENLQLLTENELHR	16	Unmodified	_LRAENLQLLTENELHR_					0	0	0	1	HEXI1_HUMANProteinHEXIM1	HEXI1_HUMANProteinHEXIM1	HEXI1_HUMANProteinHEXIM1	MULTI-MSMS	FU20160819-08	650.693	3	650.357	1948.05	74384.6	2.4046	0.0015639	0.070934	4.6132e-05	2.4756	0.00161	650.691	62.132	0.32751	62.132	62	62.328	0					208	43	7	0	0	0	9.9518e-05	1	28035	130.21
	LRAENLQLLTENELHR	16	Unmodified	_LRAENLQLLTENELHR_					0	0	0	1	HEXI1_HUMANProteinHEXIM1	HEXI1_HUMANProteinHEXIM1	HEXI1_HUMANProteinHEXIM1	MULTI-MSMS	FU20160819-08	975.037	2	975.032	1948.05	62117.7	2.5505	0.0024868	0.13101	0.00012774	2.6815	0.0026146	976.034	62.569	0.27574	62.569	62.439	62.715	-3.8147e-06					76	35	6	0	0	0	0	1	28215	261.45
	LRAENLQLLTENELHR	16	Unmodified	_LRAENLQLLTENELHR_					0	0	0	1	HEXI1_HUMANProteinHEXIM1	HEXI1_HUMANProteinHEXIM1	HEXI1_HUMANProteinHEXIM1	MULTI-MSMS	FU20160819-08	650.693	3	650.357	1948.05	74408.1	2.2743	0.0014791	0.29471	0.00019167	2.569	0.0016708	650.691	62.657	0.30606	62.657	62.439	62.745	0					218	39	7	0	0	0	3.1289e-08	1	28241	170.35
	LRAENLQLLTENELHR	16	Unmodified	_LRAENLQLLTENELHR_					0	0	0	1	HEXI1_HUMANProteinHEXIM1	HEXI1_HUMANProteinHEXIM1	HEXI1_HUMANProteinHEXIM1	MULTI-MSMS	FU20160819-08	488.271	4	488.02	1948.05	85958	2.0691	0.0010098	0.25692	0.00012538	2.326	0.0011351	488.27	62.806	0.14198	62.806	62.692	62.834	0					53	11	5	0	0	0	0.0028466	1	28358	100.68
	LRAENLQLLTENELHR	16	Unmodified	_LRAENLQLLTENELHR_					0	0	0	1	HEXI1_HUMANProteinHEXIM1	HEXI1_HUMANProteinHEXIM1	HEXI1_HUMANProteinHEXIM1	MULTI-MSMS	FU20160819-08	650.693	3	650.357	1948.05	74378.8	2.17	0.0014113	0.62599	0.00040712	2.796	0.0018184	650.692	62.998	0.21858	62.998	62.826	63.045	3.8147e-06					150	28	6	0	0	0	2.5308e-07	1	28404	172.42
	LRAENLQLLTENELHR	16	Unmodified	_LRAENLQLLTENELHR_					0	0	0	1	HEXI1_HUMANProteinHEXIM1	HEXI1_HUMANProteinHEXIM1	HEXI1_HUMANProteinHEXIM1	MULTI-MSMS	FU20160819-08	975.535	2	975.032	1948.05	62344.9	2.4283	0.0023677	-0.31844	-0.00031048	2.1099	0.0020572	975.533	63.237	0.14241	63.237	63.146	63.288	-3.8147e-06					29	18	3	0	0	0	0.0099284	1	28579	105.78
	LRAENLQLLTENELHR	16	Unmodified	_LRAENLQLLTENELHR_					0	0	0	1	HEXI1_HUMANProteinHEXIM1	HEXI1_HUMANProteinHEXIM1	HEXI1_HUMANProteinHEXIM1	MULTI-MSMS	FU20160819-08	650.693	3	650.357	1948.05	74408.1	2.1711	0.001412	0.33485	0.00021777	2.506	0.0016298	650.691	63.255	0.33619	63.255	63.177	63.513	0					82	36	7	0	0	0	1.9133e-50	1	28596	229.02
	LRAENLQLLTENELHR	16	Unmodified	_LRAENLQLLTENELHR_					0	0	0	1	HEXI1_HUMANProteinHEXIM1	HEXI1_HUMANProteinHEXIM1	HEXI1_HUMANProteinHEXIM1	MULTI-MSMS	FU20160819-08	488.271	4	488.02	1948.05	85519.7	2.0434	0.00099723	0.41252	0.00020132	2.4559	0.0011986	488.27	63.449	0.13285	63.449	63.381	63.513	0					63	11	6	0	0	0	0.0010922	1	28742	107.82
	LRAENLQLLTENELHR	16	Unmodified	_LRAENLQLLTENELHR_					0	0	0	1	HEXI1_HUMANProteinHEXIM1	HEXI1_HUMANProteinHEXIM1	HEXI1_HUMANProteinHEXIM1	MULTI-MSMS	FU20160819-08	975.037	2	975.032	1948.05	61850.6	2.4575	0.0023962	-0.0020698	-2.0182e-06	2.4555	0.0023942	975.533	63.573	0.17972	63.573	63.499	63.679	0					36	23	2	0	0	0	0	1	28786	306.14
	LRAENLQLLTENELHR	16	Unmodified	_LRAENLQLLTENELHR_					0	0	0	1	HEXI1_HUMANProteinHEXIM1	HEXI1_HUMANProteinHEXIM1	HEXI1_HUMANProteinHEXIM1	MULTI-MSMS	FU20160819-08	650.693	3	650.357	1948.05	74408.1	2.1945	0.0014272	0.42698	0.00027769	2.6215	0.0017049	650.357	63.556	0.18867	63.556	63.506	63.695	3.8147e-06					101	24	7	0	0	0	3.3241e-50	1	28796	220.72
	LRAENLQLLTENELHR	16	Unmodified	_LRAENLQLLTENELHR_					0	0	0	1	HEXI1_HUMANProteinHEXIM1	HEXI1_HUMANProteinHEXIM1	HEXI1_HUMANProteinHEXIM1	MULTI-MSMS	FU20160819-08	488.272	4	488.02	1948.05	85085.9	2.079	0.0010146	0.69555	0.00033944	2.7745	0.001354	488.271	63.899	0.24939	63.899	63.774	64.024	0					185	31	7	0	0	0	0.00038443	1	28921	120.54
	LRAENLQLLTENELHR	16	Unmodified	_LRAENLQLLTENELHR_					0	0	0	1	HEXI1_HUMANProteinHEXIM1	HEXI1_HUMANProteinHEXIM1	HEXI1_HUMANProteinHEXIM1	MULTI-MSMS	FU20160819-08	975.536	2	975.032	1948.05	61903.8	2.4837	0.0024217	0.5541	0.00054027	3.0378	0.002962	975.534	63.924	0.099453	63.924	63.855	63.954	0					35	11	5	0	0	0	1.2685e-167	1	28972	225.21
	LRAENLQLLTENELHR	16	Unmodified	_LRAENLQLLTENELHR_					0	0	0	1	HEXI1_HUMANProteinHEXIM1	HEXI1_HUMANProteinHEXIM1	HEXI1_HUMANProteinHEXIM1	MULTI-MSMS	FU20160819-08	650.693	3	650.357	1948.05	74378.8	2.2207	0.0014442	0.77589	0.00050461	2.9966	0.0019488	650.692	63.895	0.14234	63.895	63.788	63.931	0					93	17	6	0	0	0	2.4328e-74	1	28988	220.52
	LRAENLQLLTENELHR	16	Unmodified	_LRAENLQLLTENELHR_					0	0	0	1	HEXI1_HUMANProteinHEXIM1	HEXI1_HUMANProteinHEXIM1	HEXI1_HUMANProteinHEXIM1	MULTI-MSMS	FU20160819-08	488.271	4	488.02	1948.05	85519.7	2.0984	0.001024	0.20613	0.0001006	2.3045	0.0011246	488.27	64.148	0.1843	64.148	64.016	64.2	0					83	23	8	0	0	0	0.015689	1	29127	95.067
	LRAENLQLLTENELHR	16	Unmodified	_LRAENLQLLTENELHR_					0	0	0	1	HEXI1_HUMANProteinHEXIM1	HEXI1_HUMANProteinHEXIM1	HEXI1_HUMANProteinHEXIM1	MULTI-MSMS	FU20160819-08	650.693	3	650.357	1948.05	74408.1	2.2502	0.0014635	0.62833	0.00040864	2.8786	0.0018721	650.692	64.252	0.12728	64.252	64.169	64.296	0					78	14	8	0	0	0	2.2024e-42	1	29200	222.42
	LRAENLQLLTENELHR	16	Unmodified	_LRAENLQLLTENELHR_					0	0	0	1	HEXI1_HUMANProteinHEXIM1	HEXI1_HUMANProteinHEXIM1	HEXI1_HUMANProteinHEXIM1	MULTI-MSMS	FU20160819-08	488.021	4	488.02	1948.05	85519.7	2.1298	0.0010394	0.059981	2.9272e-05	2.1898	0.0010686	488.02	64.507	0.20189	64.507	64.41	64.612	0					85	25	6	0	0	0	3.3865e-07	1	29343	141.06
	LRAENLQLLTENELHR	16	Unmodified	_LRAENLQLLTENELHR_					0	0	0	1	HEXI1_HUMANProteinHEXIM1	HEXI1_HUMANProteinHEXIM1	HEXI1_HUMANProteinHEXIM1	MULTI-MSMS	FU20160819-08	650.359	3	650.357	1948.05	74408.1	2.2838	0.0014853	0.70218	0.00045667	2.986	0.0019419	651.026	64.725	0.28274	64.725	64.54	64.822	0					104	34	5	0	0	0	1.1333e-06	1	29425	177.39
	LRAENLQLLTENELHR	16	Unmodified	_LRAENLQLLTENELHR_					0	0	0	1	HEXI1_HUMANProteinHEXIM1	HEXI1_HUMANProteinHEXIM1	HEXI1_HUMANProteinHEXIM1	MULTI-MSMS	FU20160819-08	488.021	4	488.02	1948.05	86153	2.1685	0.0010583	0.51375	0.00025072	2.6823	0.001309	488.02	64.882	0.13103	64.882	64.822	64.953	0					59	16	4	0	0	0	0.00055652	1	29579	115.26
	LRAENLQLLTENELHR	16	Unmodified	_LRAENLQLLTENELHR_					0	0	0	1	HEXI1_HUMANProteinHEXIM1	HEXI1_HUMANProteinHEXIM1	HEXI1_HUMANProteinHEXIM1	MULTI-MSMS	FU20160819-08	650.693	3	650.357	1948.05	74408.2	2.3466	0.0015261	0.96318	0.00062641	3.3098	0.0021525	650.692	65.022	0.22038	65.022	64.938	65.159	0					77	24	5	0	0	0	1.8656e-06	1	29655	160.03
	LRAENLQLLTENELHR	16	Unmodified	_LRAENLQLLTENELHR_					0	0	0	1	HEXI1_HUMANProteinHEXIM1	HEXI1_HUMANProteinHEXIM1	HEXI1_HUMANProteinHEXIM1	MULTI-MSMS	FU20160819-08	488.272	4	488.02	1948.05	86153	2.2487	0.0010974	0.50738	0.00024761	2.7561	0.001345	488.27	65.195	0.40726	65.195	65.086	65.493	0					175	49	6	0	0	0	4.7219e-06	1	29814	139.21
	LRAENLQLLTENELHR	16	Unmodified	_LRAENLQLLTENELHR_					0	0	0	1	HEXI1_HUMANProteinHEXIM1	HEXI1_HUMANProteinHEXIM1	HEXI1_HUMANProteinHEXIM1	MULTI-MSMS	FU20160819-08	650.359	3	650.357	1948.05	74408.2	2.391	0.001555	0.95272	0.00061961	3.3437	0.0021746	650.358	65.196	0.31109	65.196	65.086	65.397	0					141	37	5	0	0	0	0.00027426	1	29892	118.47
	LRAENLQLLTENELHR	16	Unmodified	_LRAENLQLLTENELHR_					0	0	0	1	HEXI1_HUMANProteinHEXIM1	HEXI1_HUMANProteinHEXIM1	HEXI1_HUMANProteinHEXIM1	MULTI-MSMS	FU20160819-08	488.021	4	488.02	1948.05	85958	2.3195	0.0011319	0.53658	0.00026186	2.856	0.0013938	488.02	65.537	0.19372	65.537	65.474	65.668	0					51	20	5	0	0	0	0.00076653	1	30075	116.87
	LRAENLQLLTENELHR	16	Unmodified	_LRAENLQLLTENELHR_					0	0	0	1	HEXI1_HUMANProteinHEXIM1	HEXI1_HUMANProteinHEXIM1	HEXI1_HUMANProteinHEXIM1	MULTI-MSMS	FU20160819-08	650.693	3	650.357	1948.05	74108.6	2.4847	0.0016159	0.85912	0.00055873	3.3438	0.0021747	650.692	65.634	0.084717	65.634	65.583	65.668	0					34	10	4	0	0	0	8.1494e-15	1	30164	183.75
	LRAENLQLLTENELHR	16	Unmodified	_LRAENLQLLTENELHR_					0	0	0	1	HEXI1_HUMANProteinHEXIM1	HEXI1_HUMANProteinHEXIM1	HEXI1_HUMANProteinHEXIM1	MULTI-MSMS	FU20160819-08	650.694	3	650.357	1948.05	73869.2	2.6031	0.001693	0.79516	0.00051714	3.3983	0.0022101	650.357	66.162	0.12888	66.162	66.111	66.24	0					43	15	5	0	0	0	3.1289e-08	1	30597	190.18
	LRAENLQLLTENELHR	16	Unmodified	_LRAENLQLLTENELHR_					0	0	0	1	HEXI1_HUMANProteinHEXIM1	HEXI1_HUMANProteinHEXIM1	HEXI1_HUMANProteinHEXIM1	MULTI-MSMS	FU20160819-08	488.021	4	488.02	1948.05	85958	2.4614	0.0012012	0.48978	0.00023902	2.9512	0.0014402	488.271	66.199	0.18712	66.199	66.071	66.258	0					64	22	5	0	0	0	0.0086139	1	30613	96.435
	LRAENLQLLTENELHR	16	Unmodified	_LRAENLQLLTENELHR_					0	0	0	1	HEXI1_HUMANProteinHEXIM1	HEXI1_HUMANProteinHEXIM1	HEXI1_HUMANProteinHEXIM1	MULTI-MSMS	FU20160819-08	650.358	3	650.357	1948.05	74108.5	2.7356	0.0017791	0.4162	0.00027068	3.1518	0.0020498	650.357	66.701	0.24248	66.701	66.615	66.857	-7.6294e-06					85	30	4	0	0	0	5.8201e-06	1	30949	147.75
	LRAENLQLLTENELHR	16	Unmodified	_LRAENLQLLTENELHR_					0	0	0	1	HEXI1_HUMANProteinHEXIM1	HEXI1_HUMANProteinHEXIM1	HEXI1_HUMANProteinHEXIM1	MULTI-MSMS	FU20160819-08	650.693	3	650.357	1948.05	73869.2	2.7794	0.0018076	0.36673	0.00023851	3.1461	0.0020461	650.692	66.994	0.32129	66.994	66.817	67.139	0					138	33	5	0	0	0	1.5544e-21	1	31248	179.55
	LRAENLQLLTENELHR	16	Unmodified	_LRAENLQLLTENELHR_					0	0	0	1	HEXI1_HUMANProteinHEXIM1	HEXI1_HUMANProteinHEXIM1	HEXI1_HUMANProteinHEXIM1	MULTI-MSMS	FU20160819-08	488.021	4	488.02	1948.05	85559.1	2.6259	0.0012815	0.24177	0.00011799	2.8676	0.0013995	488.02	67.079	0.65649	67.079	66.758	67.415	0					181	70	5	0	0	0	4.7269e-05	1	31328	136.57
	LRAENLQLLTENELHR	16	Unmodified	_LRAENLQLLTENELHR_					0	0	0	1	HEXI1_HUMANProteinHEXIM1	HEXI1_HUMANProteinHEXIM1	HEXI1_HUMANProteinHEXIM1	MULTI-MSMS	FU20160819-08	650.693	3	650.357	1948.05	74349.4	2.7651	0.0017983	0.56736	0.00036899	3.3325	0.0021673	650.357	67.174	0.29436	67.174	67.12	67.415	0					67	30	3	0	0	0	4.9031e-50	1	31595	195.5
	LRAENLQLLTENELHR	16	Unmodified	_LRAENLQLLTENELHR_					0	0	0	1	HEXI1_HUMANProteinHEXIM1	HEXI1_HUMANProteinHEXIM1	HEXI1_HUMANProteinHEXIM1	MULTI-MSMS	FU20160819-08	650.359	3	650.357	1948.05	73869.2	2.7086	0.0017616	0.57011	0.00037077	3.2787	0.0021323	650.692	67.736	0.43407	67.736	67.629	68.063	0					96	46	5	0	0	0	4.1683e-07	1	31919	153.74
	LRAENLQLLTENELHR	16	Unmodified	_LRAENLQLLTENELHR_					0	0	0	1	HEXI1_HUMANProteinHEXIM1	HEXI1_HUMANProteinHEXIM1	HEXI1_HUMANProteinHEXIM1	MULTI-MSMS	FU20160819-08	488.021	4	488.02	1948.05	85805.5	2.5693	0.0012539	0.37662	0.0001838	2.9459	0.0014377	488.27	67.738	0.3793	67.738	67.526	67.906	0					128	40	5	0	0	0	0.0028466	1	31991	108.66
	LRAENLQLLTENELHR	16	Unmodified	_LRAENLQLLTENELHR_					0	0	0	1	HEXI1_HUMANProteinHEXIM1	HEXI1_HUMANProteinHEXIM1	HEXI1_HUMANProteinHEXIM1	MULTI-MSMS	FU20160819-08	488.021	4	488.02	1948.05	85758.1	2.5403	0.0012397	0.13959	6.8123e-05	2.6799	0.0013078	488.02	68.031	0.37608	68.031	67.818	68.194	0					95	41	4	0	0	0	0.0028466	1	32317	109.07
	LRAENLQLLTENELHR	16	Unmodified	_LRAENLQLLTENELHR_					0	0	0	1	HEXI1_HUMANProteinHEXIM1	HEXI1_HUMANProteinHEXIM1	HEXI1_HUMANProteinHEXIM1	MULTI-MSMS	FU20160819-08	488.522	4	488.02	1948.05	86060.5	2.4662	0.0012035	-0.082934	-4.0473e-05	2.3833	0.0011631	488.271	68.699	0.43095	68.699	68.572	69.003	0					89	47	4	0	0	0	0.0090057	1	32906	88.108
	LRAENLQLLTENELHR	16	Unmodified	_LRAENLQLLTENELHR_					0	0	0	1	HEXI1_HUMANProteinHEXIM1	HEXI1_HUMANProteinHEXIM1	HEXI1_HUMANProteinHEXIM1	MULTI-MSMS	FU20160819-08	650.693	3	650.357	1948.05	74349.4	2.6071	0.0016955	0.28721	0.00018679	2.8943	0.0018823	650.357	68.695	0.37787	68.695	68.635	69.013	0					105	40	3	0	0	0	0.0037676	1	32944	81.346
	LRAENLQLLTENELHR	16	Unmodified	_LRAENLQLLTENELHR_					0	0	0	1	HEXI1_HUMANProteinHEXIM1	HEXI1_HUMANProteinHEXIM1	HEXI1_HUMANProteinHEXIM1	MULTI-MSMS	FU20160819-08	650.153	3	650.357	1948.05	74008	2.6084	0.0016964	1.2545	0.0008159	3.863	0.0025123	650.358	69.055	0.19708	69.055	68.979	69.176	0					52	19	6	0	0	0	0.00032023	1	33123	118.71
	LRAENLQLLTENELHR	16	Unmodified	_LRAENLQLLTENELHR_					0	0	0	1	HEXI1_HUMANProteinHEXIM1	HEXI1_HUMANProteinHEXIM1	HEXI1_HUMANProteinHEXIM1	MULTI-MSMS	FU20160819-08	488.272	4	488.02	1948.05	86163.4	2.4632	0.0012021	0.15571	7.5991e-05	2.6189	0.0012781	488.27	69.055	0.29556	69.055	68.943	69.239	0					65	31	3	0	0	0	0.00038443	1	33219	120.54
	LRAENLQLLTENELHR	16	Unmodified	_LRAENLQLLTENELHR_					0	0	0	1	HEXI1_HUMANProteinHEXIM1	HEXI1_HUMANProteinHEXIM1	HEXI1_HUMANProteinHEXIM1	MULTI-MSMS	FU20160819-08	488.272	4	488.02	1948.05	86348.9	2.5116	0.0012257	0.031202	1.5227e-05	2.5428	0.001241	488.27	69.322	0.4437	69.322	69.206	69.649	0					95	43	3	0	0	0	0.007469	1	33511	101.04
	LRAENLQLLTENELHR	16	Unmodified	_LRAENLQLLTENELHR_					0	0	0	1	HEXI1_HUMANProteinHEXIM1	HEXI1_HUMANProteinHEXIM1	HEXI1_HUMANProteinHEXIM1	MULTI-MSMS	FU20160819-08	650.359	3	650.357	1948.05	74856.8	2.6764	0.0017406	0.23087	0.00015015	2.9072	0.0018907	650.691	69.544	0.36021	69.544	69.355	69.716	0					70	35	3	0	0	0	2.138e-125	1	33569	268.18
	LRAENLQLLTENELHR	16	Unmodified	_LRAENLQLLTENELHR_					0	0	0	1	HEXI1_HUMANProteinHEXIM1	HEXI1_HUMANProteinHEXIM1	HEXI1_HUMANProteinHEXIM1	MULTI-MSMS	FU20160819-08	650.693	3	650.357	1948.05	76266.1	2.7314	0.0017764	0.45358	0.00029499	3.1849	0.0020713	650.692	69.882	0.074844	69.882	69.832	69.907	0					10	7	2	0	0	0	5.1887e-15	1	33942	180.64
	LRAENLQLLTENELHR	16	Unmodified	_LRAENLQLLTENELHR_					0	0	0	1	HEXI1_HUMANProteinHEXIM1	HEXI1_HUMANProteinHEXIM1	HEXI1_HUMANProteinHEXIM1	MULTI-MSMS	FU20160819-08	488.272	4	488.02	1948.05	92168.6	3.0667	0.0014966	-0.022398	-1.093e-05	3.0443	0.0014857	488.27	73.173	0.063034	73.173	73.145	73.208	0					7	5	2	0	0	0	0.00076653	2	36259	113.52
	LRAENLQLLTENELHR	16	Unmodified	_LRAENLQLLTENELHR_					0	0	0	1	HEXI1_HUMANProteinHEXIM1	HEXI1_HUMANProteinHEXIM1	HEXI1_HUMANProteinHEXIM1	MULTI-MSMS	FU20160819-08	488.021	4	488.02	1948.05	90446.1	3.0809	0.0015035	-0.75201	-0.00036699	2.3288	0.0011365	488.019	73.862	0.26122	73.862	73.77	74.031	0					28	24	2	0	0	0	0.0020685	1	36876	111.81
	LRAENLQLLTENELHR	16	Unmodified	_LRAENLQLLTENELHR_					0	0	0	1	HEXI1_HUMANProteinHEXIM1	HEXI1_HUMANProteinHEXIM1	HEXI1_HUMANProteinHEXIM1	MULTI-MSMS	FU20160819-08	650.693	3	650.357	1948.05	74962.3	1.7262	0.0011227	1.9379	0.0012603	3.6642	0.002383	650.692	78.508	0.030174	78.508	78.495	78.525	0					10	2	5	0	0	0	4.6117e-05	1	40864	140.93
	LRAENLQLLTENELHR	16	Unmodified	_LRAENLQLLTENELHR_					0	0	0	1	HEXI1_HUMANProteinHEXIM1	HEXI1_HUMANProteinHEXIM1	HEXI1_HUMANProteinHEXIM1	MULTI-MSMS	FU20160819-08	488.271	4	488.02	1948.05	84655	1.581	0.00077154	1.1704	0.0005712	2.7514	0.0013427	488.271	78.508	0.051506	78.508	78.495	78.546	0					11	4	4	0	0	0	0.0035268	1	40870	108.06
	LRAENLQLLTENELHR	16	Unmodified	_LRAENLQLLTENELHR_					0	0	0	1	HEXI1_HUMANProteinHEXIM1	HEXI1_HUMANProteinHEXIM1	HEXI1_HUMANProteinHEXIM1	MULTI-MSMS	FU20160819-08	650.694	3	650.357	1948.05	76028.2	1.5857	0.0010313	3.6328	0.0023626	5.2185	0.0033939	650.693	78.944	0.030037	78.944	78.926	78.956	0					6	2	3	0	0	0	0.012023	1	41282	66.673
	LRAENLQLLTENELHR	16	Unmodified	_LRAENLQLLTENELHR_					0	0	0	1	HEXI1_HUMANProteinHEXIM1	HEXI1_HUMANProteinHEXIM1	HEXI1_HUMANProteinHEXIM1	MULTI-MSMS	FU20160819-08	488.022	4	488.02	1948.05	86399.2	2.4784	0.0012095	2.9815	0.001455	5.4599	0.0026645	488.021	88.952	0.030029	88.952	88.938	88.968	0					8	2	4	0	0	0	0.034006	1	50479	63.31
	LRAENLQLLTENELHR	16	Unmodified	_LRAENLQLLTENELHR_					0	0	0	1	HEXI1_HUMANProteinHEXIM1	HEXI1_HUMANProteinHEXIM1	HEXI1_HUMANProteinHEXIM1	MULTI-MSMS	FU20160819-08	650.361	3	650.357	1948.05	75696.5	2.7646	0.001798	0.42925	0.00027916	3.1938	0.0020771	650.357	89.991	0.17916	89.991	89.942	90.121	0					28	14	4	0	0	0	4.9031e-50	1	51444	205.33
	LRAENLQLLTENELHR	16	Unmodified	_LRAENLQLLTENELHR_					0	0	0	1	HEXI1_HUMANProteinHEXIM1	HEXI1_HUMANProteinHEXIM1	HEXI1_HUMANProteinHEXIM1	MULTI-MSMS	FU20160819-08	488.273	4	488.02	1948.05	89595.1	2.6176	0.0012775	0.18329	8.9451e-05	2.8009	0.0013669	488.02	89.999	0.21361	89.999	89.954	90.168	0					27	17	4	0	0	0	0.00041878	1	51445	116.87
	LRAENLQLLTENELHR	16	Unmodified	_LRAENLQLLTENELHR_					0	0	0	1	HEXI1_HUMANProteinHEXIM1	HEXI1_HUMANProteinHEXIM1	HEXI1_HUMANProteinHEXIM1	MULTI-MSMS	FU20160819-08	650.694	3	650.357	1948.05	75479.3	3.4907	0.0022702	0.96996	0.00063082	4.4607	0.002901	650.692	104.76	0.067932	104.76	104.75	104.81	0					13	6	3	0	0	0	0.011208	1	64739	91.616
	LRAENLQLLTENELHR	16	Unmodified	_LRAENLQLLTENELHR_					0	0	0	1	HEXI1_HUMANProteinHEXIM1	HEXI1_HUMANProteinHEXIM1	HEXI1_HUMANProteinHEXIM1	MULTI-MSMS	FU20160819-08	488.272	4	488.02	1948.05	87150.4	3.3426	0.0016313	-0.23946	-0.00011686	3.1032	0.0015144	488.27	104.76	0.10838	104.76	104.75	104.86	0					23	10	3	0	0	0	0.0032924	1	64740	97.823
	LRAENLQLLTENELHR	16	Unmodified	_LRAENLQLLTENELHR_					0	0	0	1	HEXI1_HUMANProteinHEXIM1	HEXI1_HUMANProteinHEXIM1	HEXI1_HUMANProteinHEXIM1	MSMS	FU20160819-08	650.359	3	650.357	1948.05	NaN	NaN	NaN	NaN	NaN	NaN	NaN	NaN	87.058	1	87.058	86.558	87.558	0								0	0	0	2.757e-141	1	48555	241.39
	LRAENLQLLTENELHR	16	Unmodified	_LRAENLQLLTENELHR_					0	0	0	1	HEXI1_HUMANProteinHEXIM1	HEXI1_HUMANProteinHEXIM1	HEXI1_HUMANProteinHEXIM1	MULTI-SECPEP	FU20160819-08	488.272	4	488.02	1948.05	86152.9	2.4256	0.0011837	-0.77605	-0.00037873	1.6495	0.00080501	488.27	66.003	0.27253	66.003	65.838	66.111	0					75	29	7	0	0	0	0.0029593	1	30329	96.489
	LRAENLQLLTENELHR	16	Unmodified	_LRAENLQLLTENELHR_					0	0	0	1	HEXI1_HUMANProteinHEXIM1	HEXI1_HUMANProteinHEXIM1	HEXI1_HUMANProteinHEXIM1	MULTI-SECPEP	FU20160819-08	488.522	4	488.02	1948.05	85952.2	2.5119	0.0012258	0.2699	0.00013172	2.7818	0.0013576	488.27	68.153	0.38491	68.153	68.063	68.448	0					68	45	2	0	0	0	0.0008046	1	32440	118.19
	LRAENLQLLTENELHR	16	Unmodified	_LRAENLQLLTENELHR_					0	0	0	1	HEXI1_HUMANProteinHEXIM1	HEXI1_HUMANProteinHEXIM1	HEXI1_HUMANProteinHEXIM1	MULTI-SECPEP	FU20160819-08	488.517	4	488.02	1948.05	81363.9	2.4849	0.0012127	-0.14049	-6.8563e-05	2.3444	0.0011441	488.02	68.532	0.12356	68.532	68.448	68.572	0					20	14	2	0	0	0	0.012646	1	32675	88.108
	LRAENLQLLTENELHR	16	Unmodified	_LRAENLQLLTENELHR_					0	0	0	1	HEXI1_HUMANProteinHEXIM1	HEXI1_HUMANProteinHEXIM1	HEXI1_HUMANProteinHEXIM1	MULTI-SECPEP	FU20160819-08	651.027	3	650.357	1948.05	71470.7	2.5689	0.0016707	-0.54815	-0.00035649	2.0208	0.0013142	650.691	66.004	0.27253	66.004	65.838	66.111	0					82	29	6	0	0	0	1.3899e-21	1	30304	140.68
	LRAENLQLLTENELHR	16	Unmodified	_LRAENLQLLTENELHR_					0	0	0	1	HEXI1_HUMANProteinHEXIM1	HEXI1_HUMANProteinHEXIM1	HEXI1_HUMANProteinHEXIM1	MULTI-SECPEP	FU20160819-08	650.692	3	650.357	1948.05	74856.8	2.6426	0.0017187	0.25887	0.00016836	2.9015	0.001887	650.691	69.273	0.1873	69.273	69.168	69.355	0					37	20	3	0	0	0	1.4447e-85	1	33263	169.15
	LRAENLQLLTENELHR	16	Unmodified	_LRAENLQLLTENELHR_					0	0	0	1	HEXI1_HUMANProteinHEXIM1	HEXI1_HUMANProteinHEXIM1	HEXI1_HUMANProteinHEXIM1	MULTI-MSMS	FU20160819-10	488.272	4	488.02	1948.05	89811.7	3.0203	0.0014739	-0.27634	-0.00013486	2.7439	0.0013391	488.019	47.055	0.099747	47.055	46.989	47.089	3.8147e-06					17	10	2	0	0	0	0.027798	1	23587	93.106
	LRAENLQLLTENELHR	16	Unmodified	_LRAENLQLLTENELHR_					0	0	0	1	HEXI1_HUMANProteinHEXIM1	HEXI1_HUMANProteinHEXIM1	HEXI1_HUMANProteinHEXIM1	MULTI-MSMS	FU20160819-10	488.272	4	488.02	1948.05	89539.9	3.377	0.001648	-0.41982	-0.00020488	2.9571	0.0014431	488.27	65.486	0.33639	65.486	65.327	65.663	0					74	37	3	0	0	0	0.015689	1	34744	74.783
	LRAENLQLLTENELHR	16	Unmodified	_LRAENLQLLTENELHR_					0	0	0	1	HEXI1_HUMANProteinHEXIM1	HEXI1_HUMANProteinHEXIM1	HEXI1_HUMANProteinHEXIM1	MULTI-MSMS	FU20160819-10	488.272	4	488.02	1948.05	87609.1	1.6369	0.00079883	1.2799	0.00062463	2.9168	0.0014235	488.271	96.458	0.14959	96.458	96.412	96.562	0					26	13	3	0	0	0	4.7219e-06	1	61359	139.21
	LRAENLQLLTENELHRQQER	20	Unmodified	_LRAENLQLLTENELHRQQER_					0	0	0	2	HEXI1_HUMANProteinHEXIM1	HEXI1_HUMANProteinHEXIM1	HEXI1_HUMANProteinHEXIM1	MULTI-MSMS	FU20160819-04	499.071	5	498.869	2489.31	83899.4	4.0689	0.0020298	-1.0491	-0.00052336	3.0198	0.0015065	499.069	58.444	0.14342	58.444	58.321	58.464	0					56	16	4	0	0	0	0.0039459	1	26738	67.902
	LRAENLQLLTENELHRQQER	20	Unmodified	_LRAENLQLLTENELHRQQER_					0	0	0	2	HEXI1_HUMANProteinHEXIM1	HEXI1_HUMANProteinHEXIM1	HEXI1_HUMANProteinHEXIM1	MULTI-MSMS	FU20160819-04	499.071	5	498.869	2489.31	84025.3	4.1964	0.0020935	-1.0338	-0.00051572	3.1626	0.0015777	499.069	58.617	0.25231	58.617	58.529	58.781	0					119	29	7	0	0	0	0.014678	1	27009	53.504
	LRAENLQLLTENELHRQQER	20	Unmodified	_LRAENLQLLTENELHRQQER_					0	0	0	2	HEXI1_HUMANProteinHEXIM1	HEXI1_HUMANProteinHEXIM1	HEXI1_HUMANProteinHEXIM1	MULTI-MSMS	FU20160819-04	623.587	4	623.335	2489.31	75329.1	2.9695	0.001851	0.383	0.00023874	3.3525	0.0020898	623.586	58.966	0.13945	58.966	58.88	59.02	0					42	15	5	0	0	0	0.0039645	1	27142	69.935
	LRAENLQLLTENELHRQQER	20	Unmodified	_LRAENLQLLTENELHRQQER_					0	0	0	2	HEXI1_HUMANProteinHEXIM1	HEXI1_HUMANProteinHEXIM1	HEXI1_HUMANProteinHEXIM1	MULTI-MSMS	FU20160819-05	623.587	4	623.335	2489.31	75778.2	2.6344	0.0016421	0.10966	6.8353e-05	2.7441	0.0017105	623.586	58.575	0.85147	58.575	58.433	59.284	0					408	98	7	0	0	0	0.0075622	3	26483	65.949
	LRAENLQLLTENELHRQQER	20	Unmodified	_LRAENLQLLTENELHRQQER_					0	0	0	2	HEXI1_HUMANProteinHEXIM1	HEXI1_HUMANProteinHEXIM1	HEXI1_HUMANProteinHEXIM1	MULTI-MSMS	FU20160819-05	498.87	5	498.869	2489.31	84284.1	2.8096	0.0014016	0.082109	4.0962e-05	2.8917	0.0014426	499.07	58.624	0.79002	58.624	58.455	59.245	0					347	90	6	0	0	0	0.031067	1	26219	45.577
	LRAENLQLLTENELHRQQER	20	Unmodified	_LRAENLQLLTENELHRQQER_					0	0	0	2	HEXI1_HUMANProteinHEXIM1	HEXI1_HUMANProteinHEXIM1	HEXI1_HUMANProteinHEXIM1	MULTI-MSMS	FU20160819-07	499.071	5	498.869	2489.31	84485.6	3.1199	0.0015564	-0.50415	-0.00025151	2.6157	0.0013049	499.07	58.93	0.57303	58.93	58.762	59.335	0					265	69	6	0	0	0	0.03333	1	24588	44.831
	LRAENLQLLTENELHRQQER	20	Unmodified	_LRAENLQLLTENELHRQQER_					0	0	0	2	HEXI1_HUMANProteinHEXIM1	HEXI1_HUMANProteinHEXIM1	HEXI1_HUMANProteinHEXIM1	MULTI-MSMS	FU20160819-08	499.272	5	498.869	2489.31	84198.1	2.3997	0.0011972	0.22272	0.00011111	2.6225	0.0013083	499.07	58.887	0.421	58.887	58.741	59.162	0					160	51	6	0	0	0	0.010396	1	25747	58.688
175176	LTWEEKK	7	Unmodified	_LTWEEKK_					0	0	0	1	HEXI1_HUMANProteinHEXIM1	HEXI1_HUMANProteinHEXIM1	HEXI1_HUMANProteinHEXIM1	MULTI-MSMS	FU20160819-04	467.257	2	467.256	932.497	86650.7	2.6664	0.0012459	-0.098965	-4.6242e-05	2.5674	0.0011996	467.256	18.009	2.4627	18.009	17.613	20.076	0					920	328	5	0	0	0	0.024742	2	7251	157.99
	LTWEEKK	7	Unmodified	_LTWEEKK_					0	0	0	1	HEXI1_HUMANProteinHEXIM1	HEXI1_HUMANProteinHEXIM1	HEXI1_HUMANProteinHEXIM1	MULTI-MSMS	FU20160819-05	467.257	2	467.256	932.497	88062.5	2.1507	0.0010049	0.45691	0.0002135	2.6076	0.0012184	467.256	18.027	1.0776	18.027	17.681	18.759	0					523	145	4	0	0	0	0.010733	2	7065	143.37
175176177181	LTWEEKKKFDEK	12	Unmodified	_LTWEEKKKFDEK_					0	0	0	3	HEXI1_HUMANProteinHEXIM1	HEXI1_HUMANProteinHEXIM1	HEXI1_HUMANProteinHEXIM1	MULTI-MSMS	FU20160819-04	527.952	3	527.615	1579.82	84102.9	2.4713	0.0013039	0.30538	0.00016112	2.7767	0.001465	527.615	22.816	0.36782	22.816	22.754	23.122	-1.9073e-06					77	45	5	0	0	0	0.0081562	1	9315	115.29
	LTWEEKKKFDEK	12	Unmodified	_LTWEEKKKFDEK_					0	0	0	3	HEXI1_HUMANProteinHEXIM1	HEXI1_HUMANProteinHEXIM1	HEXI1_HUMANProteinHEXIM1	MULTI-MSMS	FU20160819-05	527.617	3	527.615	1579.82	84215.4	2.626	0.0013855	-0.12393	-6.5386e-05	2.5021	0.0013201	527.615	23.196	0.25325	23.196	23.152	23.405	0					59	32	4	0	0	0	0.0024343	1	9289	139.32
	MEDENNR	7	Unmodified	_MEDENNR_					0	0	0	0	HEXI1_HUMANProteinHEXIM1	HEXI1_HUMANProteinHEXIM1	HEXI1_HUMANProteinHEXIM1	MULTI-MSMS	FU20160819-04	454.183	2	454.182	906.35	90236.3	2.0484	0.00093034	0.41643	0.00018913	2.4648	0.0011195	454.183	0.33184	0.071812	0.33184	0.28952	0.36133	0					21	7	3	0	0	0	0.0027111	1	63	172.39
	MEDENNR	7	Unmodified	_MEDENNR_					0	0	0	0	HEXI1_HUMANProteinHEXIM1	HEXI1_HUMANProteinHEXIM1	HEXI1_HUMANProteinHEXIM1	MULTI-MSMS	FU20160819-04	454.183	2	454.182	906.35	90684.5	1.8205	0.00082682	-0.21703	-9.8573e-05	1.6034	0.00072825	454.182	2.3278	0.31294	2.3278	2.3161	2.629	0					62	41	2	0	0	0	0.0027111	1	443	172.39
	MEDENNR	7	Unmodified	_MEDENNR_					0	0	0	0	HEXI1_HUMANProteinHEXIM1	HEXI1_HUMANProteinHEXIM1	HEXI1_HUMANProteinHEXIM1	MULTI-MSMS	FU20160819-04	454.183	2	454.182	906.35	91137.3	1.7846	0.00081055	-0.12943	-5.8784e-05	1.6552	0.00075177	454.182	2.6789	0.35477	2.6789	2.629	2.9838	2.3842e-07					88	48	3	0	0	0	1.2347e-06	1	514	181.15
	MEDENNR	7	Unmodified	_MEDENNR_					0	0	0	0	HEXI1_HUMANProteinHEXIM1	HEXI1_HUMANProteinHEXIM1	HEXI1_HUMANProteinHEXIM1	MULTI-MSMS	FU20160819-04	454.183	2	454.182	906.35	90684.6	1.6933	0.00076905	0.3117	0.00014157	2.005	0.00091062	454.182	3.6845	1.2014	3.6845	2.9627	4.1641	0					257	160	2	0	0	0	0.0054672	1	775	143.37
	MEDENNR	7	Unmodified	_MEDENNR_					0	0	0	0	HEXI1_HUMANProteinHEXIM1	HEXI1_HUMANProteinHEXIM1	HEXI1_HUMANProteinHEXIM1	MULTI-MSMS	FU20160819-04	454.183	2	454.182	906.35	90684.6	1.6134	0.0007328	0.73476	0.00033372	2.3482	0.0010665	454.183	4.3926	0.49222	4.3926	4.0082	4.5004	0					113	69	2	0	0	0	0.01582	2	960	153.88
	MEDENNR	7	Unmodified	_MEDENNR_					0	0	0	0	HEXI1_HUMANProteinHEXIM1	HEXI1_HUMANProteinHEXIM1	HEXI1_HUMANProteinHEXIM1	MSMS	FU20160819-04	454.183	2	454.182	906.35	NaN	NaN	NaN	NaN	NaN	NaN	NaN	NaN	0.0096293	1	0.0096293	-0.49037	0.50963	0								0	0	0	9.9698e-19	1	4	159.19
	MEDENNR	7	Unmodified	_MEDENNR_					0	0	0	0	HEXI1_HUMANProteinHEXIM1	HEXI1_HUMANProteinHEXIM1	HEXI1_HUMANProteinHEXIM1	MSMS	FU20160819-04	454.183	2	454.182	906.35	NaN	NaN	NaN	NaN	NaN	NaN	NaN	NaN	0.69235	1	0.69235	0.19235	1.1924	0								0	0	0	1.6895e-38	1	133	170.31
	MEDENNR	7	Unmodified	_MEDENNR_					0	0	0	0	HEXI1_HUMANProteinHEXIM1	HEXI1_HUMANProteinHEXIM1	HEXI1_HUMANProteinHEXIM1	MSMS	FU20160819-04	454.184	2	454.182	906.35	NaN	NaN	NaN	NaN	NaN	NaN	NaN	NaN	5.0911	1	5.0911	4.5911	5.5911	0								0	0	0	1.4646e-06	1	1151	143.37
	MEDENNR	7	Unmodified	_MEDENNR_					0	0	0	0	HEXI1_HUMANProteinHEXIM1	HEXI1_HUMANProteinHEXIM1	HEXI1_HUMANProteinHEXIM1	MULTI-SECPEP	FU20160819-04	454.183	2	454.182	906.35	89337.4	1.8404	0.00083586	-0.021272	-9.6613e-06	1.8191	0.00082619	454.182	2.2865	0.96671	2.2865	1.52	2.4867	0					187	124	4	0	0	0	4.0813e-110	1	376	193.7
	MEDENNR	7	Unmodified	_MEDENNR_					0	0	0	0	HEXI1_HUMANProteinHEXIM1	HEXI1_HUMANProteinHEXIM1	HEXI1_HUMANProteinHEXIM1	MULTI-MSMS	FU20160819-05	454.184	2	454.182	906.35	91941.6	2.3594	0.0010716	0.77905	0.00035383	3.1384	0.0014254	454.183	0.24166	0.16057	0.24166	0.21531	0.37587	0					24	19	2	0	0	0	0.01437	1	61	155.73
	MEDENNR	7	Unmodified	_MEDENNR_					0	0	0	0	HEXI1_HUMANProteinHEXIM1	HEXI1_HUMANProteinHEXIM1	HEXI1_HUMANProteinHEXIM1	MULTI-MSMS	FU20160819-05	454.184	2	454.182	906.35	91941.6	2.4194	0.0010989	0.3983	0.0001809	2.8177	0.0012798	454.183	1.0252	0.075323	1.0252	0.98682	1.0621	0					16	8	2	0	0	0	0.0027111	1	189	172.39
	MEDENNR	7	Unmodified	_MEDENNR_					0	0	0	0	HEXI1_HUMANProteinHEXIM1	HEXI1_HUMANProteinHEXIM1	HEXI1_HUMANProteinHEXIM1	MULTI-MSMS	FU20160819-05	454.184	2	454.182	906.35	91563.5	2.4531	0.0011142	0.47022	0.00021357	2.9233	0.0013277	454.183	1.4209	0.1652	1.4209	1.3514	1.5166	0					39	19	3	0	0	0	0.0038263	1	250	170.94
	MEDENNR	7	Unmodified	_MEDENNR_					0	0	0	0	HEXI1_HUMANProteinHEXIM1	HEXI1_HUMANProteinHEXIM1	HEXI1_HUMANProteinHEXIM1	MULTI-MSMS	FU20160819-05	454.184	2	454.182	906.35	91637.3	2.5021	0.0011364	0.40721	0.00018495	2.9093	0.0013214	454.183	2.0454	0.07708	2.0454	2.0098	2.0868	0					19	9	4	0	0	0	0.016813	1	374	159.19
	MEDENNR	7	Unmodified	_MEDENNR_					0	0	0	0	HEXI1_HUMANProteinHEXIM1	HEXI1_HUMANProteinHEXIM1	HEXI1_HUMANProteinHEXIM1	MULTI-MSMS	FU20160819-05	454.184	2	454.182	906.35	91144.2	2.5312	0.0011496	0.38965	0.00017697	2.9209	0.0013266	454.183	2.4004	0.053308	2.4004	2.373	2.4263	0					16	6	3	0	0	0	1.0695e-05	1	456	175.93
	MEDENNR	7	Unmodified	_MEDENNR_					0	0	0	0	HEXI1_HUMANProteinHEXIM1	HEXI1_HUMANProteinHEXIM1	HEXI1_HUMANProteinHEXIM1	MULTI-MSMS	FU20160819-05	454.183	2	454.182	906.35	89775.4	2.5548	0.0011603	0.10173	4.6204e-05	2.6565	0.0012065	454.182	2.7009	0.31318	2.7009	2.639	2.9522	0					77	40	5	0	0	0	0.0098033	1	538	138.48
	MEDENNR	7	Unmodified	_MEDENNR_					0	0	0	0	HEXI1_HUMANProteinHEXIM1	HEXI1_HUMANProteinHEXIM1	HEXI1_HUMANProteinHEXIM1	MULTI-MSMS	FU20160819-05	454.184	2	454.182	906.35	92957.6	2.6895	0.0012215	-0.040518	-1.8403e-05	2.649	0.0012031	454.182	4.4162	0.79825	4.4162	3.9597	4.7579	0					255	104	3	0	0	0	0.010177	1	880	148.07
	MEDENNR	7	Unmodified	_MEDENNR_					0	0	0	0	HEXI1_HUMANProteinHEXIM1	HEXI1_HUMANProteinHEXIM1	HEXI1_HUMANProteinHEXIM1	MULTI-MSMS	FU20160819-05	454.184	2	454.182	906.35	92666.6	2.7433	0.0012459	0.29359	0.00013334	3.0369	0.0013793	454.183	5.0127	0.6553	5.0127	4.7579	5.4132	0					138	89	2	0	0	0	0.030353	1	1145	114.02
	MEDENNR	7	Unmodified	_MEDENNR_					0	0	0	0	HEXI1_HUMANProteinHEXIM1	HEXI1_HUMANProteinHEXIM1	HEXI1_HUMANProteinHEXIM1	MSMS	FU20160819-05	454.184	2	454.182	906.35	NaN	NaN	NaN	NaN	NaN	NaN	NaN	NaN	0.69395	1	0.69395	0.19395	1.1939	0								0	0	0	4.8074e-28	1	123	164.1
	MEDENNR	7	Unmodified	_MEDENNR_					0	0	0	0	HEXI1_HUMANProteinHEXIM1	HEXI1_HUMANProteinHEXIM1	HEXI1_HUMANProteinHEXIM1	MSMS	FU20160819-05	454.184	2	454.182	906.35	NaN	NaN	NaN	NaN	NaN	NaN	NaN	NaN	1.7113	1	1.7113	1.2113	2.2113	0								0	0	0	9.9698e-19	1	308	159.19
	MEDENNR	7	Unmodified	_MEDENNR_					0	0	0	0	HEXI1_HUMANProteinHEXIM1	HEXI1_HUMANProteinHEXIM1	HEXI1_HUMANProteinHEXIM1	MULTI-SECPEP	FU20160819-05	454.676	2	454.182	906.35	91122.6	2.5642	0.0011646	-0.15157	-6.8841e-05	2.4126	0.0010958	454.182	2.7694	0.20466	2.7694	2.7475	2.9522	2.3842e-07					51	26	2	0	0	0	8.3403e-06	1	582	143.37
	MEDENNR	7	Unmodified	_MEDENNR_					0	0	0	0	HEXI1_HUMANProteinHEXIM1	HEXI1_HUMANProteinHEXIM1	HEXI1_HUMANProteinHEXIM1	MULTI-SECPEP	FU20160819-05	454.675	2	454.182	906.35	89775.4	2.6048	0.0011831	0.15479	7.0305e-05	2.7596	0.0012534	454.182	3.3145	0.14317	3.3145	3.2485	3.3917	0					29	17	3	0	0	0	8.3403e-06	1	658	143.37
	MEDENNR	7	Unmodified	_MEDENNR_					0	0	0	0	HEXI1_HUMANProteinHEXIM1	HEXI1_HUMANProteinHEXIM1	HEXI1_HUMANProteinHEXIM1	MULTI-SECPEP	FU20160819-05	454.676	2	454.182	906.35	89775.4	2.5877	0.0011753	-0.11831	-5.3736e-05	2.4694	0.0011216	454.182	3.135	0.3229	3.135	2.9436	3.2666	0					101	42	3	0	0	0	8.3403e-06	1	582	143.37
	MEDENNR	7	Unmodified	_MEDENNR_					0	0	0	0	HEXI1_HUMANProteinHEXIM1	HEXI1_HUMANProteinHEXIM1	HEXI1_HUMANProteinHEXIM1	MULTI-SECPEP	FU20160819-05	454.676	2	454.182	906.35	91820.4	2.6305	0.0011947	0.048968	2.224e-05	2.6794	0.001217	454.182	3.5311	0.38297	3.5311	3.4957	3.8787	0					61	50	2	0	0	0	4.0888e-10	1	735	148.07
	MEDENNR	7	Unmodified	_MEDENNR_					0	0	0	0	HEXI1_HUMANProteinHEXIM1	HEXI1_HUMANProteinHEXIM1	HEXI1_HUMANProteinHEXIM1	MULTI-SECPEP	FU20160819-05	454.676	2	454.182	906.35	92666.6	2.7898	0.0012671	0.75561	0.00034318	3.5454	0.0016103	454.183	5.5706	0.41348	5.5706	5.4132	5.8267	0					90	58	2	0	0	0	0.03416	1	1259	138.48
	MEDENNR	7	Unmodified	_MEDENNR_					0	0	0	0	HEXI1_HUMANProteinHEXIM1	HEXI1_HUMANProteinHEXIM1	HEXI1_HUMANProteinHEXIM1	MULTI-MSMS	FU20160819-07	454.183	2	454.182	906.35	80106.3	2.5274	0.0011479	-0.57666	-0.00026191	1.9507	0.00088598	454.182	6.6826	1.3216	6.6826	6.2936	7.6152	0					627	178	5	0	0	0	9.0521e-48	4	1015	208.57
	MEDENNR	7	Unmodified	_MEDENNR_					0	0	0	0	HEXI1_HUMANProteinHEXIM1	HEXI1_HUMANProteinHEXIM1	HEXI1_HUMANProteinHEXIM1	MULTI-MSMS	FU20160819-07	454.183	2	454.182	906.35	91378.5	2.3984	0.0010893	-0.22503	-0.00010221	2.1733	0.00098709	454.182	8.6494	1.522	8.6494	7.6152	9.1372	0					530	184	3	0	0	0	0.0027111	4	1329	172.39
	MEDENNR	7	Unmodified	_MEDENNR_					0	0	0	0	HEXI1_HUMANProteinHEXIM1	HEXI1_HUMANProteinHEXIM1	HEXI1_HUMANProteinHEXIM1	MULTI-MSMS	FU20160819-07	454.183	2	454.182	906.35	90164.4	2.3186	0.0010531	0.16151	7.3355e-05	2.4801	0.0011264	454.182	9.1996	0.69808	9.1996	9.1457	9.8437	0					172	88	3	0	0	0	0.010177	1	2440	148.07
	MEDENNR	7	Unmodified	_MEDENNR_					0	0	0	0	HEXI1_HUMANProteinHEXIM1	HEXI1_HUMANProteinHEXIM1	HEXI1_HUMANProteinHEXIM1	MULTI-MSMS	FU20160819-07	454.184	2	454.182	906.35	93328.8	2.6169	0.0011886	-1.253	-0.00056907	1.3639	0.00061948	454.183	10.455	0.09362	10.455	10.397	10.49	0					22	11	3	0	0	0	0.0098033	1	3238	138.48
	MEDENNR	7	Unmodified	_MEDENNR_					0	0	0	0	HEXI1_HUMANProteinHEXIM1	HEXI1_HUMANProteinHEXIM1	HEXI1_HUMANProteinHEXIM1	MULTI-MSMS	FU20160819-07	454.183	2	454.182	906.35	89953.7	3.0574	0.0013886	-0.20345	-9.2406e-05	2.8539	0.0012962	454.182	12.382	0.5451	12.382	12.109	12.654	0					139	70	3	0	0	0	0.0077823	1	4493	128.38
	MEDENNR	7	Unmodified	_MEDENNR_					0	0	0	0	HEXI1_HUMANProteinHEXIM1	HEXI1_HUMANProteinHEXIM1	HEXI1_HUMANProteinHEXIM1	MULTI-MSMS	FU20160819-07	454.183	2	454.182	906.35	93122.3	3.1182	0.0014162	-0.74653	-0.00033906	2.3717	0.0010772	454.182	13.198	0.52084	13.198	12.985	13.506	-9.5367e-07					138	69	3	0	0	0	0.020887	1	4867	118.69
	MEDENNR	7	Unmodified	_MEDENNR_					0	0	0	0	HEXI1_HUMANProteinHEXIM1	HEXI1_HUMANProteinHEXIM1	HEXI1_HUMANProteinHEXIM1	MULTI-MSMS	FU20160819-07	454.183	2	454.182	906.35	91140.5	3.1605	0.0014354	-0.48194	-0.00021889	2.6785	0.0012165	454.182	13.882	0.33075	13.882	13.742	14.073	-9.5367e-07					82	41	3	0	0	0	0.0051484	1	5266	139.92
	MEDENNR	7	Unmodified	_MEDENNR_					0	0	0	0	HEXI1_HUMANProteinHEXIM1	HEXI1_HUMANProteinHEXIM1	HEXI1_HUMANProteinHEXIM1	MULTI-MSMS	FU20160819-08	454.183	2	454.182	906.35	82839	1.6511	0.00074989	0.15543	7.0592e-05	1.8065	0.00082048	454.183	9.6014	4.3548	9.6014	8.8037	13.159	0					838	535	5	0	0	0	0.0052642	12	4473	155.73
	MEDENNR	7	Unmodified	_MEDENNR_					0	0	0	0	HEXI1_HUMANProteinHEXIM1	HEXI1_HUMANProteinHEXIM1	HEXI1_HUMANProteinHEXIM1	MULTI-MSMS	FU20160819-08	454.183	2	454.182	906.35	91841.5	2.3498	0.0010672	0.14249	6.4716e-05	2.4923	0.0011319	454.182	15.545	0.55547	15.545	15.281	15.837	-9.5367e-07					139	71	2	0	0	0	0.013541	2	5896	124.89
	MEDENNR	7	Unmodified	_MEDENNR_					0	0	0	0	HEXI1_HUMANProteinHEXIM1	HEXI1_HUMANProteinHEXIM1	HEXI1_HUMANProteinHEXIM1	MULTI-MSMS	FU20160819-08	454.183	2	454.182	906.35	91841.6	2.061	0.00093606	0.39557	0.00017966	2.4566	0.0011157	454.183	16.975	0.68754	16.975	16.616	17.304	0					148	88	2	0	0	0	0.006008	2	6877	144.29
	MEDENNR	7	Unmodified	_MEDENNR_					0	0	0	0	HEXI1_HUMANProteinHEXIM1	HEXI1_HUMANProteinHEXIM1	HEXI1_HUMANProteinHEXIM1	MSMS	FU20160819-08	454.184	2	454.182	906.35	NaN	NaN	NaN	NaN	NaN	NaN	NaN	NaN	13.399	1	13.399	12.899	13.899	0								0	0	0	0.00042569	1	4792	138.48
	MEDENNR	7	Unmodified	_MEDENNR_					0	0	0	0	HEXI1_HUMANProteinHEXIM1	HEXI1_HUMANProteinHEXIM1	HEXI1_HUMANProteinHEXIM1	MSMS	FU20160819-08	454.183	2	454.182	906.35	NaN	NaN	NaN	NaN	NaN	NaN	NaN	NaN	14.747	1	14.747	14.247	15.247	9.5367e-07								0	0	0	0.00030097	1	5513	139.92
	MEDENNR	7	Unmodified	_MEDENNR_					0	0	0	0	HEXI1_HUMANProteinHEXIM1	HEXI1_HUMANProteinHEXIM1	HEXI1_HUMANProteinHEXIM1	MSMS	FU20160819-08	454.183	2	454.182	906.35	NaN	NaN	NaN	NaN	NaN	NaN	NaN	NaN	16.448	1	16.448	15.948	16.948	0								0	0	0	1.4646e-06	1	6559	143.37
	PGPEGEGSLESQPPPLQTQACPESSCLR	28	Unmodified	_PGPEGEGSLESQPPPLQTQACPESSCLR_					0	0	0	0	HEXI1_HUMANProteinHEXIM1	HEXI1_HUMANProteinHEXIM1	HEXI1_HUMANProteinHEXIM1	MULTI-MSMS	FU20160819-04	1003.8	3	1003.46	3007.37	60556.9	1.9235	0.0019301	0.74237	0.00074494	2.6658	0.0026751	1003.8	60.344	0.29876	60.344	60.323	60.622	0					155	33	5	0	0	0	7.7707e-20	1	28355	121.94
	PGPEGEGSLESQPPPLQTQACPESSCLR	28	Unmodified	_PGPEGEGSLESQPPPLQTQACPESSCLR_					0	0	0	0	HEXI1_HUMANProteinHEXIM1	HEXI1_HUMANProteinHEXIM1	HEXI1_HUMANProteinHEXIM1	MULTI-SECPEP	FU20160819-04	1003.8	3	1003.46	3007.37	60553.8	2.0609	0.0020681	0.5064	0.00050816	2.5673	0.0025762	1003.8	60.23	0.64038	60.23	59.754	60.395	0					262	75	9	0	0	0	2.1678e-109	1	28094	156.79
	PGPEGEGSLESQPPPLQTQACPESSCLR	28	Unmodified	_PGPEGEGSLESQPPPLQTQACPESSCLR_					0	0	0	0	HEXI1_HUMANProteinHEXIM1	HEXI1_HUMANProteinHEXIM1	HEXI1_HUMANProteinHEXIM1	MULTI-MSMS	FU20160819-05	752.851	4	752.849	3007.37	69689.6	4.7625	0.0035855	-2.4579	-0.0018504	2.3047	0.0017351	753.098	60.223	0.56732	60.223	59.922	60.489	0					279	67	5	0	0	0	2.2409e-07	2	27636	79.558
	PGPEGEGSLESQPPPLQTQACPESSCLR	28	Unmodified	_PGPEGEGSLESQPPPLQTQACPESSCLR_					0	0	0	0	HEXI1_HUMANProteinHEXIM1	HEXI1_HUMANProteinHEXIM1	HEXI1_HUMANProteinHEXIM1	MULTI-MSMS	FU20160819-05	1003.8	3	1003.46	3007.37	60891.8	2.0715	0.0020787	-0.036675	-3.6802e-05	2.0348	0.0020419	1003.8	60.266	1.037	60.266	59.646	60.683	0					768	120	10	0	0	0	5.8242e-25	3	27452	142.25
	PGPEGEGSLESQPPPLQTQACPESSCLR	28	Unmodified	_PGPEGEGSLESQPPPLQTQACPESSCLR_					0	0	0	0	HEXI1_HUMANProteinHEXIM1	HEXI1_HUMANProteinHEXIM1	HEXI1_HUMANProteinHEXIM1	MULTI-MSMS	FU20160819-05	1505.7	2	1504.69	3007.37	49752.8	1.7035	0.0025632	0.0447	6.726e-05	1.7482	0.0026304	1505.19	60.261	0.61629	60.261	59.906	60.522	3.8147e-06					364	72	7	0	0	0	3.2117e-12	1	27661	76.158
	PGPEGEGSLESQPPPLQTQACPESSCLR	28	Unmodified	_PGPEGEGSLESQPPPLQTQACPESSCLR_					0	0	0	0	HEXI1_HUMANProteinHEXIM1	HEXI1_HUMANProteinHEXIM1	HEXI1_HUMANProteinHEXIM1	MULTI-MSMS	FU20160819-07	1004.13	3	1003.46	3007.37	60395.3	2.4698	0.0024784	-0.1403	-0.00014079	2.3295	0.0023376	1003.8	60.187	0.046291	60.187	60.16	60.206	0					8	5	2	0	0	0	0.019177	1	25613	55.662
	PGPEGEGSLESQPPPLQTQACPESSCLR	28	Unmodified	_PGPEGEGSLESQPPPLQTQACPESSCLR_					0	0	0	0	HEXI1_HUMANProteinHEXIM1	HEXI1_HUMANProteinHEXIM1	HEXI1_HUMANProteinHEXIM1	MULTI-MSMS	FU20160819-07	1003.8	3	1003.46	3007.37	60871.1	2.3599	0.0023681	-0.053427	-5.3612e-05	2.3065	0.0023145	1003.8	60.528	0.7514	60.528	60.222	60.973	-3.8147e-06					456	89	7	0	0	0	3.4903e-13	3	25870	104.96
	PGPEGEGSLESQPPPLQTQACPESSCLR	28	Unmodified	_PGPEGEGSLESQPPPLQTQACPESSCLR_					0	0	0	0	HEXI1_HUMANProteinHEXIM1	HEXI1_HUMANProteinHEXIM1	HEXI1_HUMANProteinHEXIM1	MULTI-MSMS	FU20160819-08	1003.8	3	1003.46	3007.37	60804.5	2.9366	0.0029468	-0.78748	-0.00079021	2.1491	0.0021566	1003.8	60.719	0.78681	60.719	60.299	61.086	-3.8147e-06					466	91	7	0	0	0	6.2183e-39	2	27171	156.79
90	PGPEGEGSLESQPPPLQTQACPESSCLREGEK	32	Unmodified	_PGPEGEGSLESQPPPLQTQACPESSCLREGEK_					0	0	0	1	HEXI1_HUMANProteinHEXIM1	HEXI1_HUMANProteinHEXIM1	HEXI1_HUMANProteinHEXIM1	MULTI-MSMS	FU20160819-04	863.651	4	863.649	3450.57	63918.7	2.8885	0.0024947	0.11833	0.0001022	3.0068	0.0025969	863.9	55.526	0.29535	55.526	55.361	55.656	-3.8147e-06					138	33	6	0	0	0	9.069e-15	3	24726	73.654
	PGPEGEGSLESQPPPLQTQACPESSCLREGEK	32	Unmodified	_PGPEGEGSLESQPPPLQTQACPESSCLREGEK_					0	0	0	1	HEXI1_HUMANProteinHEXIM1	HEXI1_HUMANProteinHEXIM1	HEXI1_HUMANProteinHEXIM1	MULTI-MSMS	FU20160819-04	1152.2	3	1151.2	3450.57	56754.3	2.7537	0.0031701	-0.67694	-0.00077929	2.0768	0.0023908	1151.53	55.532	0.39769	55.532	55.302	55.699	0					129	46	5	0	0	0	0.010279	1	24638	39.885
	PGPEGEGSLESQPPPLQTQACPESSCLREGEK	32	Unmodified	_PGPEGEGSLESQPPPLQTQACPESSCLREGEK_					0	0	0	1	HEXI1_HUMANProteinHEXIM1	HEXI1_HUMANProteinHEXIM1	HEXI1_HUMANProteinHEXIM1	MULTI-MSMS	FU20160819-05	864.403	4	863.649	3450.57	66639.5	2.2542	0.0019468	-0.047085	-4.0665e-05	2.2071	0.0019062	864.15	55.869	0.41866	55.869	55.597	56.015	0					144	56	5	0	0	0	1.2457e-10	2	24342	65.817
	PGPEGEGSLESQPPPLQTQACPESSCLREGEK	32	Unmodified	_PGPEGEGSLESQPPPLQTQACPESSCLREGEK_					0	0	0	1	HEXI1_HUMANProteinHEXIM1	HEXI1_HUMANProteinHEXIM1	HEXI1_HUMANProteinHEXIM1	MULTI-MSMS	FU20160819-05	1151.87	3	1151.2	3450.57	57805.1	2.0848	0.0024	-0.31373	-0.00036116	1.7711	0.0020389	1151.86	55.878	0.4557	55.878	55.597	56.052	0					239	61	6	0	0	0	1.6363e-18	1	24433	75.82
	PGPEGEGSLESQPPPLQTQACPESSCLREGEK	32	Unmodified	_PGPEGEGSLESQPPPLQTQACPESSCLREGEK_					0	0	0	1	HEXI1_HUMANProteinHEXIM1	HEXI1_HUMANProteinHEXIM1	HEXI1_HUMANProteinHEXIM1	MULTI-MSMS	FU20160819-08	1151.53	3	1151.2	3450.57	59121.6	2.57	0.0029586	-0.20319	-0.00023391	2.3668	0.0027247	1151.86	56.142	0.28369	56.142	55.982	56.266	0					70	34	3	0	0	0	6.1137e-19	2	23698	84.905
	PPGAEERVPEEDSR	14	Unmodified	_PPGAEERVPEEDSR_					0	0	0	1	HEXI1_HUMANProteinHEXIM1	HEXI1_HUMANProteinHEXIM1	HEXI1_HUMANProteinHEXIM1	MULTI-SECPEP	FU20160819-07	523.251	3	523.25	1566.73	82949.8	2.3691	0.0012396	0.38973	0.00020393	2.7588	0.0014436	523.25	20.582	2.1274	20.582	19.395	21.522	0					921	275	5	0	0	0	3.0334e-11	1	8815	132.86
169175	PYYKLTWEEK	10	Unmodified	_PYYKLTWEEK_					0	0	0	1	HEXI1_HUMANProteinHEXIM1	HEXI1_HUMANProteinHEXIM1	HEXI1_HUMANProteinHEXIM1	MSMS	FU20160819-07	452.9	3	452.899	1355.68	NaN	NaN	NaN	NaN	NaN	NaN	NaN	NaN	54.285	1	54.285	53.785	54.785	-3.8147e-06								0	0	0	0.028217	1	21450	84.817
	PYYKLTWEEK	10	Unmodified	_PYYKLTWEEK_					0	0	0	1	HEXI1_HUMANProteinHEXIM1	HEXI1_HUMANProteinHEXIM1	HEXI1_HUMANProteinHEXIM1	MULTI-SECPEP	FU20160819-07	453.221	3	452.899	1355.68	97900.6	2.4948	0.0011299	0.123	5.5705e-05	2.6178	0.0011856	453.234	52.627	0.15443	52.627	52.586	52.74	0					30	20	2	0	0	0	2.2888e-27	1	20645	131.12
169175176	PYYKLTWEEKK	11	Unmodified	_PYYKLTWEEKK_					0	0	0	2	HEXI1_HUMANProteinHEXIM1	HEXI1_HUMANProteinHEXIM1	HEXI1_HUMANProteinHEXIM1	MULTI-MSMS	FU20160819-07	495.934	3	495.598	1483.77	87058.3	3.5415	0.0017551	-0.23507	-0.0001165	3.3064	0.0016386	495.932	45.983	0.46476	45.983	45.761	46.226	0					174	58	4	0	0	0	0.00055059	1	16920	141.08
	PYYKLTWEEKK	11	Unmodified	_PYYKLTWEEKK_					0	0	0	2	HEXI1_HUMANProteinHEXIM1	HEXI1_HUMANProteinHEXIM1	HEXI1_HUMANProteinHEXIM1	MULTI-MSMS	FU20160819-08	495.599	3	495.598	1483.77	86800.6	2.5815	0.0012794	0.015536	7.6995e-06	2.5971	0.0012871	495.598	45.758	0.35428	45.758	45.521	45.875	0					146	39	5	0	0	0	3.5548e-07	1	17212	160.91
	PYYKLTWEEKK	11	Unmodified	_PYYKLTWEEKK_					0	0	0	2	HEXI1_HUMANProteinHEXIM1	HEXI1_HUMANProteinHEXIM1	HEXI1_HUMANProteinHEXIM1	MULTI-MSMS	FU20160819-08	743.396	2	742.893	1483.77	71316.4	1.5884	0.00118	1.4879	0.0011053	3.0763	0.0022853	742.894	45.762	0.32545	45.762	45.549	45.875	0					100	35	4	0	0	0	0.020419	1	17393	134.57
289296	QELIKEYLELEK	12	Unmodified	_QELIKEYLELEK_					0	0	0	1	HEXI1_HUMANProteinHEXIM1	HEXI1_HUMANProteinHEXIM1	HEXI1_HUMANProteinHEXIM1	MULTI-MSMS	FU20160819-04	512.619	3	512.284	1533.83	83206.8	3.4076	0.0017456	-1.0405	-0.00053301	2.3671	0.0012126	512.283	68.966	0.65456	68.966	68.747	69.402	0					472	82	6	0	0	0	4.0395e-23	2	33480	206.36
	QELIKEYLELEK	12	Unmodified	_QELIKEYLELEK_					0	0	0	1	HEXI1_HUMANProteinHEXIM1	HEXI1_HUMANProteinHEXIM1	HEXI1_HUMANProteinHEXIM1	MULTI-MSMS	FU20160819-04	767.924	2	767.922	1533.83	69436.2	4.4655	0.0034291	-1.5271	-0.0011727	2.9384	0.0022564	767.92	69.016	0.62154	69.016	68.756	69.378	0					393	78	6	0	0	0	9.0641e-277	2	33747	255.52
	QELIKEYLELEK	12	Unmodified	_QELIKEYLELEK_					0	0	0	1	HEXI1_HUMANProteinHEXIM1	HEXI1_HUMANProteinHEXIM1	HEXI1_HUMANProteinHEXIM1	MULTI-MSMS	FU20160819-04	1535.84	1	1534.84	1533.83	49477.6	3.1763	0.004875	-0.52215	-0.00080141	2.6541	0.0040736	1535.84	68.866	0.10602	68.866	68.787	68.893	0					12	10	2	0	0	0	0	1	33587	262.07
	QELIKEYLELEK	12	Unmodified	_QELIKEYLELEK_					0	0	0	1	HEXI1_HUMANProteinHEXIM1	HEXI1_HUMANProteinHEXIM1	HEXI1_HUMANProteinHEXIM1	MULTI-MSMS	FU20160819-04	512.285	3	512.284	1533.83	83206.8	3.1725	0.0016252	-0.98582	-0.00050502	2.1866	0.0011202	512.283	69.526	0.308	69.526	69.378	69.686	0					225	39	6	0	0	0	0.0016445	1	33988	114.71
	QELIKEYLELEK	12	Unmodified	_QELIKEYLELEK_					0	0	0	1	HEXI1_HUMANProteinHEXIM1	HEXI1_HUMANProteinHEXIM1	HEXI1_HUMANProteinHEXIM1	MULTI-MSMS	FU20160819-04	767.924	2	767.922	1533.83	69436.2	4.2115	0.0032341	-1.4226	-0.0010925	2.7888	0.0021416	767.92	69.465	0.42714	69.465	69.341	69.768	0					223	54	6	0	0	0	0	1	33994	322.27
	QELIKEYLELEK	12	Unmodified	_QELIKEYLELEK_					0	0	0	1	HEXI1_HUMANProteinHEXIM1	HEXI1_HUMANProteinHEXIM1	HEXI1_HUMANProteinHEXIM1	MULTI-MSMS	FU20160819-04	512.285	3	512.284	1533.83	83824.4	2.7136	0.0013902	-0.34008	-0.00017422	2.3736	0.0012159	512.283	69.839	0.90022	69.839	69.768	70.668	0					510	111	5	0	0	0	0.000424	3	34575	158.3
	QELIKEYLELEK	12	Unmodified	_QELIKEYLELEK_					0	0	0	1	HEXI1_HUMANProteinHEXIM1	HEXI1_HUMANProteinHEXIM1	HEXI1_HUMANProteinHEXIM1	MULTI-MSMS	FU20160819-04	767.924	2	767.922	1533.83	69431.4	4.0128	0.0030815	-1.1167	-0.00085755	2.8961	0.002224	767.921	69.836	0.21367	69.836	69.768	69.982	0					90	23	4	0	0	0	0	1	34254	262.07
	QELIKEYLELEK	12	Unmodified	_QELIKEYLELEK_					0	0	0	1	HEXI1_HUMANProteinHEXIM1	HEXI1_HUMANProteinHEXIM1	HEXI1_HUMANProteinHEXIM1	MULTI-MSMS	FU20160819-04	767.924	2	767.922	1533.83	69431.4	3.7183	0.0028554	-0.7332	-0.00056304	2.9851	0.0022923	767.921	70.631	0.68552	70.631	69.974	70.66	0					346	87	4	0	0	0	2.0455e-117	2	34592	218.07
	QELIKEYLELEK	12	Unmodified	_QELIKEYLELEK_					0	0	0	1	HEXI1_HUMANProteinHEXIM1	HEXI1_HUMANProteinHEXIM1	HEXI1_HUMANProteinHEXIM1	MULTI-MSMS	FU20160819-04	512.285	3	512.284	1533.83	84201.9	2.2705	0.0011631	0.20647	0.00010577	2.4769	0.0012689	512.284	70.808	0.56833	70.808	70.591	71.159	0					336	74	6	0	0	0	2.9283e-05	2	35108	169.65
	QELIKEYLELEK	12	Unmodified	_QELIKEYLELEK_					0	0	0	1	HEXI1_HUMANProteinHEXIM1	HEXI1_HUMANProteinHEXIM1	HEXI1_HUMANProteinHEXIM1	MULTI-MSMS	FU20160819-04	767.924	2	767.922	1533.83	69462.2	3.3479	0.0025709	-0.36704	-0.00028185	2.9809	0.0022891	767.921	70.744	0.49937	70.744	70.66	71.159	0					242	65	5	0	0	0	0.0005951	1	35141	152.64
	QELIKEYLELEK	12	Unmodified	_QELIKEYLELEK_					0	0	0	1	HEXI1_HUMANProteinHEXIM1	HEXI1_HUMANProteinHEXIM1	HEXI1_HUMANProteinHEXIM1	MULTI-MSMS	FU20160819-04	512.285	3	512.284	1533.83	85356.8	2.0507	0.0010506	0.3958	0.00020276	2.4465	0.0012533	512.284	71.545	0.31432	71.545	71.476	71.79	0					55	38	2	0	0	0	0.0015088	1	35628	126.12
	QELIKEYLELEK	12	Unmodified	_QELIKEYLELEK_					0	0	0	1	HEXI1_HUMANProteinHEXIM1	HEXI1_HUMANProteinHEXIM1	HEXI1_HUMANProteinHEXIM1	MULTI-MSMS	FU20160819-04	512.619	3	512.284	1533.83	84581.8	1.9838	0.0010163	0.65531	0.00033571	2.6391	0.001352	512.284	71.844	0.6207	71.844	71.46	72.081	0					179	73	5	0	0	0	4.7658e-52	1	35929	204.32
	QELIKEYLELEK	12	Unmodified	_QELIKEYLELEK_					0	0	0	1	HEXI1_HUMANProteinHEXIM1	HEXI1_HUMANProteinHEXIM1	HEXI1_HUMANProteinHEXIM1	MULTI-MSMS	FU20160819-04	767.923	2	767.922	1533.83	70851	3.107	0.0023859	0.084802	6.5121e-05	3.1918	0.0024511	767.922	71.879	0.39587	71.879	71.693	72.088	0					116	45	3	0	0	0	3.6137e-39	1	36107	188.96
	QELIKEYLELEK	12	Unmodified	_QELIKEYLELEK_					0	0	0	1	HEXI1_HUMANProteinHEXIM1	HEXI1_HUMANProteinHEXIM1	HEXI1_HUMANProteinHEXIM1	MULTI-MSMS	FU20160819-04	512.285	3	512.284	1533.83	85356.9	1.7996	0.00092192	0.69065	0.00035381	2.4903	0.0012757	512.284	72.58	0.14721	72.58	72.483	72.631	0					25	18	2	0	0	0	6.5227e-09	1	36456	182.71
	QELIKEYLELEK	12	Unmodified	_QELIKEYLELEK_					0	0	0	1	HEXI1_HUMANProteinHEXIM1	HEXI1_HUMANProteinHEXIM1	HEXI1_HUMANProteinHEXIM1	MULTI-MSMS	FU20160819-04	768.426	2	767.922	1533.83	72130.9	3.0684	0.0023563	0.03497	2.6854e-05	3.1033	0.0023831	767.922	72.686	0.26505	72.686	72.601	72.866	-7.6294e-06					53	33	3	0	0	0	1.4196e-188	2	36600	236.22
	QELIKEYLELEK	12	Unmodified	_QELIKEYLELEK_					0	0	0	1	HEXI1_HUMANProteinHEXIM1	HEXI1_HUMANProteinHEXIM1	HEXI1_HUMANProteinHEXIM1	MULTI-MSMS	FU20160819-04	512.619	3	512.284	1533.83	85356.9	1.9687	0.0010086	0.67719	0.00034691	2.6459	0.0013555	512.618	72.663	0.40685	72.663	72.601	73.008	0					77	52	2	0	0	0	0.0051859	1	36706	124.39
	QELIKEYLELEK	12	Unmodified	_QELIKEYLELEK_					0	0	0	1	HEXI1_HUMANProteinHEXIM1	HEXI1_HUMANProteinHEXIM1	HEXI1_HUMANProteinHEXIM1	MULTI-MSMS	FU20160819-04	512.285	3	512.284	1533.83	85313.3	2.6588	0.0013621	0.12118	6.2078e-05	2.78	0.0014242	512.284	73.528	0.81256	73.528	73.001	73.813	0					248	99	4	0	0	0	0.000424	1	37251	153.54
	QELIKEYLELEK	12	Unmodified	_QELIKEYLELEK_					0	0	0	1	HEXI1_HUMANProteinHEXIM1	HEXI1_HUMANProteinHEXIM1	HEXI1_HUMANProteinHEXIM1	MULTI-MSMS	FU20160819-04	767.924	2	767.922	1533.83	71921.2	4.0659	0.0031223	-0.76583	-0.0005881	3.3001	0.0025342	767.921	73.772	0.20474	73.772	73.662	73.866	0					45	22	3	0	0	0	1.8573e-117	1	37468	218.55
	QELIKEYLELEK	12	Unmodified	_QELIKEYLELEK_					0	0	0	1	HEXI1_HUMANProteinHEXIM1	HEXI1_HUMANProteinHEXIM1	HEXI1_HUMANProteinHEXIM1	MULTI-MSMS	FU20160819-04	512.619	3	512.284	1533.83	85313.2	3.236	0.0016577	-0.47454	-0.0002431	2.7614	0.0014146	512.283	74.168	0.77058	74.168	73.662	74.432	0					240	86	4	0	0	0	0.0025396	2	37881	128.36
	QELIKEYLELEK	12	Unmodified	_QELIKEYLELEK_					0	0	0	1	HEXI1_HUMANProteinHEXIM1	HEXI1_HUMANProteinHEXIM1	HEXI1_HUMANProteinHEXIM1	MULTI-MSMS	FU20160819-04	512.285	3	512.284	1533.83	85313.2	3.4993	0.0017926	-0.60307	-0.00030894	2.8962	0.0014837	512.283	74.531	0.37046	74.531	74.316	74.686	0					94	42	4	0	0	0	0.00070143	1	38201	158.3
	QELIKEYLELEK	12	Unmodified	_QELIKEYLELEK_					0	0	0	1	HEXI1_HUMANProteinHEXIM1	HEXI1_HUMANProteinHEXIM1	HEXI1_HUMANProteinHEXIM1	MULTI-MSMS	FU20160819-04	512.62	3	512.284	1533.83	85313.2	3.1297	0.0016033	-0.046675	-2.3911e-05	3.083	0.0015794	512.283	75.02	0.47139	75.02	74.813	75.285	7.6294e-06					146	48	4	0	0	0	0.00025313	1	38537	149.23
	QELIKEYLELEK	12	Unmodified	_QELIKEYLELEK_					0	0	0	1	HEXI1_HUMANProteinHEXIM1	HEXI1_HUMANProteinHEXIM1	HEXI1_HUMANProteinHEXIM1	MULTI-MSMS	FU20160819-04	767.927	2	767.922	1533.83	70656.9	4.4047	0.0033824	-0.8122	-0.0006237	3.5925	0.0027587	767.921	75.012	0.60658	75.012	74.66	75.266	0					87	62	2	0	0	0	0	1	38650	282.61
	QELIKEYLELEK	12	Unmodified	_QELIKEYLELEK_					0	0	0	1	HEXI1_HUMANProteinHEXIM1	HEXI1_HUMANProteinHEXIM1	HEXI1_HUMANProteinHEXIM1	MULTI-MSMS	FU20160819-04	768.426	2	767.922	1533.83	71921.2	3.9471	0.003031	-0.41663	-0.00031994	3.5304	0.0027111	767.921	75.439	0.37218	75.439	75.173	75.545	0					95	40	3	0	0	0	1.0731e-97	1	39005	213.35
	QELIKEYLELEK	12	Unmodified	_QELIKEYLELEK_					0	0	0	1	HEXI1_HUMANProteinHEXIM1	HEXI1_HUMANProteinHEXIM1	HEXI1_HUMANProteinHEXIM1	MULTI-MSMS	FU20160819-04	512.619	3	512.284	1533.83	85079.4	2.6322	0.0013485	0.15284	7.8297e-05	2.7851	0.0014267	512.618	75.824	0.75886	75.824	75.275	76.034	0					189	74	4	0	0	0	0.00017447	2	39617	155.47
	QELIKEYLELEK	12	Unmodified	_QELIKEYLELEK_					0	0	0	1	HEXI1_HUMANProteinHEXIM1	HEXI1_HUMANProteinHEXIM1	HEXI1_HUMANProteinHEXIM1	MULTI-MSMS	FU20160819-04	767.924	2	767.922	1533.83	71921.2	3.7784	0.0029015	-0.41369	-0.00031768	3.3647	0.0025838	767.921	75.689	0.40462	75.689	75.545	75.95	-7.6294e-06					73	35	3	0	0	0	6.6288e-216	1	39349	242.45
	QELIKEYLELEK	12	Unmodified	_QELIKEYLELEK_					0	0	0	1	HEXI1_HUMANProteinHEXIM1	HEXI1_HUMANProteinHEXIM1	HEXI1_HUMANProteinHEXIM1	MULTI-MSMS	FU20160819-04	767.924	2	767.922	1533.83	73442.1	3.502	0.0026892	-0.55805	-0.00042854	2.9439	0.0022607	767.921	76.909	0.17017	76.909	76.792	76.962	0					22	17	2	0	0	0	6.3126e-163	1	40349	231.05
	QELIKEYLELEK	12	Unmodified	_QELIKEYLELEK_					0	0	0	1	HEXI1_HUMANProteinHEXIM1	HEXI1_HUMANProteinHEXIM1	HEXI1_HUMANProteinHEXIM1	MULTI-MSMS	FU20160819-04	512.285	3	512.284	1533.83	85645.6	2.2316	0.0011432	0.17392	8.9096e-05	2.4055	0.0012323	512.284	76.778	0.3849	76.778	76.633	77.017	0					67	43	2	0	0	0	0.00023531	1	40416	164.48
	QELIKEYLELEK	12	Unmodified	_QELIKEYLELEK_					0	0	0	1	HEXI1_HUMANProteinHEXIM1	HEXI1_HUMANProteinHEXIM1	HEXI1_HUMANProteinHEXIM1	MULTI-MSMS	FU20160819-04	768.427	2	767.922	1533.83	72234.4	3.3351	0.0025611	0.35912	0.00027578	3.6942	0.0028368	768.424	77.373	0.21286	77.373	77.251	77.464	0					19	17	2	0	0	0	1.0761e-245	1	40712	251.43
	QELIKEYLELEK	12	Unmodified	_QELIKEYLELEK_					0	0	0	1	HEXI1_HUMANProteinHEXIM1	HEXI1_HUMANProteinHEXIM1	HEXI1_HUMANProteinHEXIM1	MULTI-MSMS	FU20160819-04	512.285	3	512.284	1533.83	86012.2	1.6023	0.00082081	1.1638	0.00059617	2.766	0.001417	512.619	80.075	0.28052	80.075	79.922	80.202	0					67	33	3	0	0	0	0.00070143	1	42797	153.54
	QELIKEYLELEK	12	Unmodified	_QELIKEYLELEK_					0	0	0	1	HEXI1_HUMANProteinHEXIM1	HEXI1_HUMANProteinHEXIM1	HEXI1_HUMANProteinHEXIM1	MULTI-MSMS	FU20160819-04	512.285	3	512.284	1533.83	86907.2	1.3946	0.00071444	1.2631	0.00064709	2.6578	0.0013615	512.284	81.179	0.78457	81.179	80.561	81.346	0					127	80	3	0	0	0	0.00013442	2	43305	159.44
	QELIKEYLELEK	12	Unmodified	_QELIKEYLELEK_					0	0	0	1	HEXI1_HUMANProteinHEXIM1	HEXI1_HUMANProteinHEXIM1	HEXI1_HUMANProteinHEXIM1	MULTI-MSMS	FU20160819-04	512.285	3	512.284	1533.83	86457.4	1.2683	0.00064974	1.4307	0.00073294	2.6991	0.0013827	512.619	81.631	0.21806	81.631	81.537	81.755	0					37	25	2	0	0	0	0.0013062	1	44167	138.45
	QELIKEYLELEK	12	Unmodified	_QELIKEYLELEK_					0	0	0	1	HEXI1_HUMANProteinHEXIM1	HEXI1_HUMANProteinHEXIM1	HEXI1_HUMANProteinHEXIM1	MULTI-MSMS	FU20160819-04	512.285	3	512.284	1533.83	86921.9	1.2045	0.00061703	1.4664	0.00075121	2.6709	0.0013682	512.284	81.925	0.29321	81.925	81.824	82.117	0					58	32	3	0	0	0	0.0013628	1	44489	131.17
	QELIKEYLELEK	12	Unmodified	_QELIKEYLELEK_					0	0	0	1	HEXI1_HUMANProteinHEXIM1	HEXI1_HUMANProteinHEXIM1	HEXI1_HUMANProteinHEXIM1	MULTI-MSMS	FU20160819-04	512.285	3	512.284	1533.83	85340.1	1.2926	0.00066219	1.4058	0.00072017	2.6984	0.0013824	512.284	83.003	0.40263	83.003	82.776	83.179	0					77	37	3	0	0	0	6.5227e-09	1	45444	171.49
	QELIKEYLELEK	12	Unmodified	_QELIKEYLELEK_					0	0	0	1	HEXI1_HUMANProteinHEXIM1	HEXI1_HUMANProteinHEXIM1	HEXI1_HUMANProteinHEXIM1	MULTI-MSMS	FU20160819-04	512.62	3	512.284	1533.83	85340.1	1.4402	0.00073781	1.2875	0.00065959	2.7278	0.0013974	512.619	83.24	0.30779	83.24	83.124	83.432	0					80	31	3	0	0	0	0.00085944	1	45794	142.89
	QELIKEYLELEK	12	Unmodified	_QELIKEYLELEK_					0	0	0	1	HEXI1_HUMANProteinHEXIM1	HEXI1_HUMANProteinHEXIM1	HEXI1_HUMANProteinHEXIM1	MULTI-MSMS	FU20160819-04	512.285	3	512.284	1533.83	85340.1	1.584	0.00081144	1.0676	0.00054694	2.6516	0.0013584	512.284	83.52	0.29874	83.52	83.432	83.731	7.6294e-06					58	28	3	0	0	0	0.0010077	1	46172	124.39
	QELIKEYLELEK	12	Unmodified	_QELIKEYLELEK_					0	0	0	1	HEXI1_HUMANProteinHEXIM1	HEXI1_HUMANProteinHEXIM1	HEXI1_HUMANProteinHEXIM1	MULTI-MSMS	FU20160819-04	512.286	3	512.284	1533.83	85434.4	1.8552	0.00095038	0.83193	0.00042619	2.6871	0.0013766	512.618	84.032	0.43427	84.032	83.879	84.313	0					84	43	3	0	0	0	0.0003431	2	46854	171.49
	QELIKEYLELEK	12	Unmodified	_QELIKEYLELEK_					0	0	0	1	HEXI1_HUMANProteinHEXIM1	HEXI1_HUMANProteinHEXIM1	HEXI1_HUMANProteinHEXIM1	MULTI-MSMS	FU20160819-04	767.925	2	767.922	1533.83	70474.7	3.273	0.0025134	0.12106	9.2966e-05	3.3941	0.0026064	767.922	84.276	0.10739	84.276	84.251	84.359	0					11	9	2	0	0	0	0.0067589	1	46865	132.25
	QELIKEYLELEK	12	Unmodified	_QELIKEYLELEK_					0	0	0	1	HEXI1_HUMANProteinHEXIM1	HEXI1_HUMANProteinHEXIM1	HEXI1_HUMANProteinHEXIM1	MULTI-MSMS	FU20160819-04	512.285	3	512.284	1533.83	85387.2	2.0613	0.001056	0.41401	0.00021209	2.4753	0.0012681	512.284	84.454	0.52625	84.454	84.313	84.839	0					70	50	2	0	0	0	0.00043888	1	47210	154.67
	QELIKEYLELEK	12	Unmodified	_QELIKEYLELEK_					0	0	0	1	HEXI1_HUMANProteinHEXIM1	HEXI1_HUMANProteinHEXIM1	HEXI1_HUMANProteinHEXIM1	MULTI-MSMS	FU20160819-04	768.426	2	767.922	1533.83	72793.9	3.3627	0.0025823	-0.25739	-0.00019765	3.1053	0.0023846	767.921	84.717	0.32825	84.717	84.563	84.891	0					46	33	3	0	0	0	0	1	47270	275.13
	QELIKEYLELEK	12	Unmodified	_QELIKEYLELEK_					0	0	0	1	HEXI1_HUMANProteinHEXIM1	HEXI1_HUMANProteinHEXIM1	HEXI1_HUMANProteinHEXIM1	MULTI-MSMS	FU20160819-04	512.285	3	512.284	1533.83	85434.3	2.2907	0.0011735	0.3663	0.00018765	2.657	0.0013612	512.284	85.01	0.20612	85.01	84.839	85.045	0					51	24	3	0	0	0	0.00070143	1	47558	136.53
	QELIKEYLELEK	12	Unmodified	_QELIKEYLELEK_					0	0	0	1	HEXI1_HUMANProteinHEXIM1	HEXI1_HUMANProteinHEXIM1	HEXI1_HUMANProteinHEXIM1	MULTI-MSMS	FU20160819-04	767.929	2	767.922	1533.83	72678.3	3.5627	0.0027359	-0.21656	-0.0001663	3.3462	0.0025696	767.921	84.978	0.32582	84.978	84.891	85.217	0					44	33	2	0	0	0	4.8043e-277	1	47611	257.09
	QELIKEYLELEK	12	Unmodified	_QELIKEYLELEK_					0	0	0	1	HEXI1_HUMANProteinHEXIM1	HEXI1_HUMANProteinHEXIM1	HEXI1_HUMANProteinHEXIM1	MULTI-MSMS	FU20160819-04	512.62	3	512.284	1533.83	85387.1	2.4892	0.0012752	0.18269	9.3588e-05	2.6719	0.0013688	512.284	85.313	0.23647	85.313	85.239	85.476	0					39	22	2	0	0	0	0.00076603	1	47911	138.42
	QELIKEYLELEK	12	Unmodified	_QELIKEYLELEK_					0	0	0	1	HEXI1_HUMANProteinHEXIM1	HEXI1_HUMANProteinHEXIM1	HEXI1_HUMANProteinHEXIM1	MULTI-MSMS	FU20160819-04	512.62	3	512.284	1533.83	85434.4	2.6337	0.0013492	0.60902	0.00031199	3.2427	0.0016612	512.284	85.745	0.48642	85.745	85.476	85.962	-7.6294e-06					119	49	3	0	0	0	0.01704	1	48361	64.827
	QELIKEYLELEK	12	Unmodified	_QELIKEYLELEK_					0	0	0	1	HEXI1_HUMANProteinHEXIM1	HEXI1_HUMANProteinHEXIM1	HEXI1_HUMANProteinHEXIM1	MULTI-MSMS	FU20160819-04	767.924	2	767.922	1533.83	72640.4	3.8347	0.0029448	-0.83431	-0.00064069	3.0004	0.0023041	767.921	86.404	0.63291	86.404	85.954	86.587	0					128	70	3	0	0	0	0	2	49005	282.61
	QELIKEYLELEK	12	Unmodified	_QELIKEYLELEK_					0	0	0	1	HEXI1_HUMANProteinHEXIM1	HEXI1_HUMANProteinHEXIM1	HEXI1_HUMANProteinHEXIM1	MULTI-MSMS	FU20160819-04	512.284	3	512.284	1533.83	85434.3	2.6802	0.001373	-0.03859	-1.9769e-05	2.6416	0.0013533	512.618	85.93	0.51346	85.93	85.87	86.384	0					130	53	3	0	0	0	0.0005767	1	48730	159.44
	QELIKEYLELEK	12	Unmodified	_QELIKEYLELEK_					0	0	0	1	HEXI1_HUMANProteinHEXIM1	HEXI1_HUMANProteinHEXIM1	HEXI1_HUMANProteinHEXIM1	MULTI-MSMS	FU20160819-04	512.619	3	512.284	1533.83	85338.6	2.7308	0.0013989	-0.1898	-9.7231e-05	2.541	0.0013017	512.283	86.743	0.5826	86.743	86.361	86.944	0					164	63	4	0	0	0	0.001076	2	49049	135.1
	QELIKEYLELEK	12	Unmodified	_QELIKEYLELEK_					0	0	0	1	HEXI1_HUMANProteinHEXIM1	HEXI1_HUMANProteinHEXIM1	HEXI1_HUMANProteinHEXIM1	MULTI-MSMS	FU20160819-04	768.425	2	767.922	1533.83	71394.4	3.9415	0.0030268	-0.98503	-0.00075643	2.9565	0.0022704	767.921	86.616	0.39982	86.616	86.533	86.933	0					67	40	2	0	0	0	0.014745	1	49344	112.85
	QELIKEYLELEK	12	Unmodified	_QELIKEYLELEK_					0	0	0	1	HEXI1_HUMANProteinHEXIM1	HEXI1_HUMANProteinHEXIM1	HEXI1_HUMANProteinHEXIM1	MULTI-MSMS	FU20160819-04	512.285	3	512.284	1533.83	85338.7	2.7746	0.0014214	0.0349	1.7879e-05	2.8095	0.0014392	512.618	87.199	0.53054	87.199	86.944	87.474	0					91	47	4	0	0	0	2.7533e-06	1	49767	177.04
	QELIKEYLELEK	12	Unmodified	_QELIKEYLELEK_					0	0	0	1	HEXI1_HUMANProteinHEXIM1	HEXI1_HUMANProteinHEXIM1	HEXI1_HUMANProteinHEXIM1	MULTI-MSMS	FU20160819-04	512.619	3	512.284	1533.83	85387.1	2.8142	0.0014417	-0.009406	-4.8186e-06	2.8048	0.0014368	512.284	87.8	0.57567	87.8	87.379	87.955	0					140	56	4	0	0	0	1.0831e-08	1	50106	167.71
	QELIKEYLELEK	12	Unmodified	_QELIKEYLELEK_					0	0	0	1	HEXI1_HUMANProteinHEXIM1	HEXI1_HUMANProteinHEXIM1	HEXI1_HUMANProteinHEXIM1	MULTI-MSMS	FU20160819-04	512.287	3	512.284	1533.83	85168.6	2.8411	0.0014554	0.11188	5.7316e-05	2.9529	0.0015127	512.284	87.956	0.35192	87.956	87.829	88.181	0					77	33	4	0	0	0	6.6393e-05	1	50473	165.35
	QELIKEYLELEK	12	Unmodified	_QELIKEYLELEK_					0	0	0	1	HEXI1_HUMANProteinHEXIM1	HEXI1_HUMANProteinHEXIM1	HEXI1_HUMANProteinHEXIM1	MULTI-MSMS	FU20160819-04	512.619	3	512.284	1533.83	85340	2.7834	0.0014259	-0.19616	-0.00010049	2.5873	0.0013254	512.283	88.41	0.46147	88.41	88.152	88.614	7.6294e-06					97	40	3	0	0	0	0.00018969	2	50823	155.33
	QELIKEYLELEK	12	Unmodified	_QELIKEYLELEK_					0	0	0	1	HEXI1_HUMANProteinHEXIM1	HEXI1_HUMANProteinHEXIM1	HEXI1_HUMANProteinHEXIM1	MULTI-MSMS	FU20160819-04	767.923	2	767.922	1533.83	70658.3	3.568	0.0027399	-0.40124	-0.00030812	3.1667	0.0024318	768.423	88.793	0.29639	88.793	88.614	88.91	0					51	27	3	0	0	0	7.0948e-08	1	51327	162.26
	QELIKEYLELEK	12	Unmodified	_QELIKEYLELEK_					0	0	0	1	HEXI1_HUMANProteinHEXIM1	HEXI1_HUMANProteinHEXIM1	HEXI1_HUMANProteinHEXIM1	MULTI-MSMS	FU20160819-04	512.285	3	512.284	1533.83	85387.1	2.4946	0.0012779	0.20395	0.00010448	2.6985	0.0013824	512.284	88.703	0.46651	88.703	88.465	88.931	0					111	42	4	0	0	0	0.00019375	1	51544	164.48
	QELIKEYLELEK	12	Unmodified	_QELIKEYLELEK_					0	0	0	1	HEXI1_HUMANProteinHEXIM1	HEXI1_HUMANProteinHEXIM1	HEXI1_HUMANProteinHEXIM1	MULTI-MSMS	FU20160819-04	512.62	3	512.284	1533.83	85387.2	1.9313	0.00098938	0.64792	0.00033192	2.5792	0.0013213	512.284	89.462	0.63542	89.462	89.174	89.809	7.6294e-06					111	57	4	0	0	0	0.00070143	2	52268	150.09
	QELIKEYLELEK	12	Unmodified	_QELIKEYLELEK_					0	0	0	1	HEXI1_HUMANProteinHEXIM1	HEXI1_HUMANProteinHEXIM1	HEXI1_HUMANProteinHEXIM1	MULTI-MSMS	FU20160819-04	768.426	2	767.922	1533.83	72548.8	3.0028	0.002306	0.1731	0.00013293	3.176	0.0024389	768.423	89.483	0.3387	89.483	89.295	89.634	0					41	27	3	0	0	0	0.011867	1	52293	114.89
	QELIKEYLELEK	12	Unmodified	_QELIKEYLELEK_					0	0	0	1	HEXI1_HUMANProteinHEXIM1	HEXI1_HUMANProteinHEXIM1	HEXI1_HUMANProteinHEXIM1	MULTI-MSMS	FU20160819-04	512.619	3	512.284	1533.83	85340.1	1.7685	0.000906	0.79387	0.00040669	2.5624	0.0013127	512.618	90.005	0.71095	90.005	89.809	90.52	-7.6294e-06					172	67	3	0	0	0	0.0015088	1	52608	132.56
	QELIKEYLELEK	12	Unmodified	_QELIKEYLELEK_					0	0	0	1	HEXI1_HUMANProteinHEXIM1	HEXI1_HUMANProteinHEXIM1	HEXI1_HUMANProteinHEXIM1	MULTI-MSMS	FU20160819-04	767.924	2	767.922	1533.83	72541.7	3.103	0.0023828	0.1395	0.00010712	3.2425	0.0024899	767.922	90.364	0.21207	90.364	90.282	90.494	0					27	18	2	0	0	0	0.010983	1	53066	144.55
	QELIKEYLELEK	12	Unmodified	_QELIKEYLELEK_					0	0	0	1	HEXI1_HUMANProteinHEXIM1	HEXI1_HUMANProteinHEXIM1	HEXI1_HUMANProteinHEXIM1	MULTI-MSMS	FU20160819-04	512.285	3	512.284	1533.83	85387.2	1.975	0.0010117	0.46249	0.00023692	2.4375	0.0012487	512.284	90.827	0.56732	90.827	90.475	91.042	0					148	53	4	0	0	0	0.00070143	2	53297	158.3
	QELIKEYLELEK	12	Unmodified	_QELIKEYLELEK_					0	0	0	1	HEXI1_HUMANProteinHEXIM1	HEXI1_HUMANProteinHEXIM1	HEXI1_HUMANProteinHEXIM1	MULTI-MSMS	FU20160819-04	767.924	2	767.922	1533.83	74971.1	3.5888	0.0027559	-0.59152	-0.00045424	2.9973	0.0023017	767.921	92.023	0.16977	92.023	91.948	92.118	0					19	16	2	0	0	0	0.0063269	1	54730	141.88
	QELIKEYLELEK	12	Unmodified	_QELIKEYLELEK_					0	0	0	1	HEXI1_HUMANProteinHEXIM1	HEXI1_HUMANProteinHEXIM1	HEXI1_HUMANProteinHEXIM1	MULTI-MSMS	FU20160819-04	768.426	2	767.922	1533.83	71059.2	3.7525	0.0028816	-0.62296	-0.00047838	3.1295	0.0024032	767.921	92.789	0.32332	92.789	92.522	92.845	0					32	26	2	0	0	0	0.0031008	1	55438	133.91
	QELIKEYLELEK	12	Unmodified	_QELIKEYLELEK_					0	0	0	1	HEXI1_HUMANProteinHEXIM1	HEXI1_HUMANProteinHEXIM1	HEXI1_HUMANProteinHEXIM1	MULTI-MSMS	FU20160819-04	512.285	3	512.284	1533.83	85387.1	2.5138	0.0012878	0.24414	0.00012507	2.7579	0.0014128	512.284	92.881	0.70795	92.881	92.291	92.999	-7.6294e-06					124	62	4	0	0	0	2.7533e-06	1	55650	170.4
	QELIKEYLELEK	12	Unmodified	_QELIKEYLELEK_					0	0	0	1	HEXI1_HUMANProteinHEXIM1	HEXI1_HUMANProteinHEXIM1	HEXI1_HUMANProteinHEXIM1	MULTI-MSMS	FU20160819-04	512.285	3	512.284	1533.83	85121.6	2.4996	0.0012805	-0.10453	-5.3549e-05	2.3951	0.0012269	512.618	93.466	0.28144	93.466	93.304	93.585	0					52	28	3	0	0	0	0.00070143	1	55977	147.26
	QELIKEYLELEK	12	Unmodified	_QELIKEYLELEK_					0	0	0	1	HEXI1_HUMANProteinHEXIM1	HEXI1_HUMANProteinHEXIM1	HEXI1_HUMANProteinHEXIM1	MULTI-MSMS	FU20160819-04	512.287	3	512.284	1533.83	85230.7	2.4903	0.0012757	0.03523	1.8048e-05	2.5255	0.0012938	512.284	93.596	0.56364	93.596	93.473	94.036	0					76	57	2	0	0	0	0.0003431	1	56257	171.49
	QELIKEYLELEK	12	Unmodified	_QELIKEYLELEK_					0	0	0	1	HEXI1_HUMANProteinHEXIM1	HEXI1_HUMANProteinHEXIM1	HEXI1_HUMANProteinHEXIM1	MULTI-MSMS	FU20160819-04	512.285	3	512.284	1533.83	85230.7	2.4719	0.0012663	0.34496	0.00017672	2.8168	0.001443	512.618	94.167	0.5458	94.167	94.036	94.582	0					151	55	4	0	0	0	0.0013075	2	56901	142.97
	QELIKEYLELEK	12	Unmodified	_QELIKEYLELEK_					0	0	0	1	HEXI1_HUMANProteinHEXIM1	HEXI1_HUMANProteinHEXIM1	HEXI1_HUMANProteinHEXIM1	MULTI-MSMS	FU20160819-04	512.285	3	512.284	1533.83	85230.7	2.5336	0.0012979	0.14054	7.1999e-05	2.6742	0.0013699	512.284	94.983	0.6449	94.983	94.509	95.154	0					91	61	2	0	0	0	2.0977e-14	2	57232	187.78
	QELIKEYLELEK	12	Unmodified	_QELIKEYLELEK_					0	0	0	1	HEXI1_HUMANProteinHEXIM1	HEXI1_HUMANProteinHEXIM1	HEXI1_HUMANProteinHEXIM1	MULTI-MSMS	FU20160819-04	768.427	2	767.922	1533.83	73172.6	3.6447	0.0027988	-0.25043	-0.00019231	3.3942	0.0026065	767.922	94.733	0.45442	94.733	94.455	94.909	-7.6294e-06					63	43	3	0	0	0	5.3041e-30	1	57262	186.74
	QELIKEYLELEK	12	Unmodified	_QELIKEYLELEK_					0	0	0	1	HEXI1_HUMANProteinHEXIM1	HEXI1_HUMANProteinHEXIM1	HEXI1_HUMANProteinHEXIM1	MULTI-MSMS	FU20160819-04	768.426	2	767.922	1533.83	71855.3	3.922	0.0030118	-0.85392	-0.00065574	3.0681	0.002356	767.921	95.379	0.45153	95.379	95.163	95.614	0					58	45	2	0	0	0	0.021083	1	57804	125.23
	QELIKEYLELEK	12	Unmodified	_QELIKEYLELEK_					0	0	0	1	HEXI1_HUMANProteinHEXIM1	HEXI1_HUMANProteinHEXIM1	HEXI1_HUMANProteinHEXIM1	MULTI-MSMS	FU20160819-04	512.285	3	512.284	1533.83	85230.6	2.774	0.0014211	-0.43892	-0.00022485	2.3351	0.0011962	512.283	95.439	0.49567	95.439	95.35	95.846	0					127	52	4	0	0	0	0.001076	1	57926	150.09
	QELIKEYLELEK	12	Unmodified	_QELIKEYLELEK_					0	0	0	1	HEXI1_HUMANProteinHEXIM1	HEXI1_HUMANProteinHEXIM1	HEXI1_HUMANProteinHEXIM1	MULTI-MSMS	FU20160819-04	768.423	2	767.922	1533.83	77051.7	4.0355	0.0030989	-1.4137	-0.0010856	2.6218	0.0020133	768.422	95.681	0.14197	95.681	95.623	95.765	0					25	15	2	0	0	0	0.00045097	1	58160	153.97
	QELIKEYLELEK	12	Unmodified	_QELIKEYLELEK_					0	0	0	1	HEXI1_HUMANProteinHEXIM1	HEXI1_HUMANProteinHEXIM1	HEXI1_HUMANProteinHEXIM1	MULTI-MSMS	FU20160819-04	512.285	3	512.284	1533.83	85230.6	3.0179	0.001546	-0.52934	-0.00027117	2.4886	0.0012749	512.618	96.29	0.63782	96.29	95.75	96.388	7.6294e-06					151	65	4	0	0	0	1.6023e-13	2	58257	187.78
	QELIKEYLELEK	12	Unmodified	_QELIKEYLELEK_					0	0	0	1	HEXI1_HUMANProteinHEXIM1	HEXI1_HUMANProteinHEXIM1	HEXI1_HUMANProteinHEXIM1	MULTI-MSMS	FU20160819-04	512.62	3	512.284	1533.83	85071.1	3.3189	0.0017002	-0.74308	-0.00038067	2.5758	0.0013195	512.618	96.442	0.27592	96.442	96.395	96.671	7.6294e-06					43	34	2	0	0	0	0.00017447	1	58869	153.74
	QELIKEYLELEK	12	Unmodified	_QELIKEYLELEK_					0	0	0	1	HEXI1_HUMANProteinHEXIM1	HEXI1_HUMANProteinHEXIM1	HEXI1_HUMANProteinHEXIM1	MULTI-MSMS	FU20160819-04	512.619	3	512.284	1533.83	85071.1	3.8462	0.0019703	-0.89733	-0.00045969	2.9488	0.0015106	512.283	97.162	0.34158	97.162	96.919	97.261	-7.6294e-06					91	37	4	0	0	0	1.0181e-09	2	59394	179.35
	QELIKEYLELEK	12	Unmodified	_QELIKEYLELEK_					0	0	0	1	HEXI1_HUMANProteinHEXIM1	HEXI1_HUMANProteinHEXIM1	HEXI1_HUMANProteinHEXIM1	MULTI-MSMS	FU20160819-04	512.285	3	512.284	1533.83	85071.1	4.338	0.0022223	-1.6421	-0.0008412	2.6959	0.0013811	512.283	97.739	0.35854	97.739	97.489	97.848	0					91	38	4	0	0	0	0.00085883	1	60055	116.24
	QELIKEYLELEK	12	Unmodified	_QELIKEYLELEK_					0	0	0	1	HEXI1_HUMANProteinHEXIM1	HEXI1_HUMANProteinHEXIM1	HEXI1_HUMANProteinHEXIM1	MULTI-MSMS	FU20160819-04	512.285	3	512.284	1533.83	85020.8	3.2235	0.0016514	-0.50854	-0.00026052	2.715	0.0013908	512.283	99.291	0.78286	99.291	98.703	99.486	0					159	81	3	0	0	0	2.7379e-05	2	61014	171.49
	QELIKEYLELEK	12	Unmodified	_QELIKEYLELEK_					0	0	0	1	HEXI1_HUMANProteinHEXIM1	HEXI1_HUMANProteinHEXIM1	HEXI1_HUMANProteinHEXIM1	MULTI-MSMS	FU20160819-04	512.285	3	512.284	1533.83	85071.1	3.2137	0.0016464	-0.56987	-0.00029193	2.6439	0.0013544	512.283	99.657	0.41643	99.657	99.415	99.831	0					119	43	4	0	0	0	0.00088934	1	61691	160.52
	QELIKEYLELEK	12	Unmodified	_QELIKEYLELEK_					0	0	0	1	HEXI1_HUMANProteinHEXIM1	HEXI1_HUMANProteinHEXIM1	HEXI1_HUMANProteinHEXIM1	MULTI-MSMS	FU20160819-04	512.285	3	512.284	1533.83	85071.1	3.2674	0.0016738	-0.7576	-0.00038811	2.5098	0.0012857	512.283	99.982	0.42427	99.982	99.709	100.13	0					108	44	4	0	0	0	0.00093032	1	62042	153.74
	QELIKEYLELEK	12	Unmodified	_QELIKEYLELEK_					0	0	0	1	HEXI1_HUMANProteinHEXIM1	HEXI1_HUMANProteinHEXIM1	HEXI1_HUMANProteinHEXIM1	MULTI-MSMS	FU20160819-04	767.924	2	767.922	1533.83	71214.3	4.6165	0.0035451	-2.0568	-0.0015794	2.5597	0.0019656	767.92	100.25	0.14526	100.25	100.18	100.33	7.6294e-06					23	15	2	0	0	0	0.011797	1	62456	117.52
	QELIKEYLELEK	12	Unmodified	_QELIKEYLELEK_					0	0	0	1	HEXI1_HUMANProteinHEXIM1	HEXI1_HUMANProteinHEXIM1	HEXI1_HUMANProteinHEXIM1	MULTI-MSMS	FU20160819-04	512.285	3	512.284	1533.83	85071.1	3.4148	0.0017493	-1.0643	-0.00054524	2.3505	0.0012041	512.283	100.63	0.82108	100.63	100.12	100.94	7.6294e-06					189	86	4	0	0	0	6.6393e-05	1	62816	171.49
	QELIKEYLELEK	12	Unmodified	_QELIKEYLELEK_					0	0	0	1	HEXI1_HUMANProteinHEXIM1	HEXI1_HUMANProteinHEXIM1	HEXI1_HUMANProteinHEXIM1	MULTI-MSMS	FU20160819-04	767.923	2	767.922	1533.83	71461.7	4.5754	0.0035136	-1.8049	-0.001386	2.7706	0.0021276	767.92	100.66	0.14737	100.66	100.6	100.75	-7.6294e-06					28	14	4	0	0	0	0.013047	1	62817	146.71
	QELIKEYLELEK	12	Unmodified	_QELIKEYLELEK_					0	0	0	1	HEXI1_HUMANProteinHEXIM1	HEXI1_HUMANProteinHEXIM1	HEXI1_HUMANProteinHEXIM1	MULTI-MSMS	FU20160819-04	512.285	3	512.284	1533.83	85071.1	3.629	0.0018591	-1.1445	-0.00058632	2.4845	0.0012728	512.283	101.09	0.37691	101.09	100.88	101.26	0					102	37	4	0	0	0	0.00093032	1	63146	145.14
	QELIKEYLELEK	12	Unmodified	_QELIKEYLELEK_					0	0	0	1	HEXI1_HUMANProteinHEXIM1	HEXI1_HUMANProteinHEXIM1	HEXI1_HUMANProteinHEXIM1	MULTI-MSMS	FU20160819-04	767.924	2	767.922	1533.83	72295.6	4.798	0.0036845	-1.6218	-0.0012454	3.1762	0.0024391	767.921	100.87	0.30759	100.87	100.73	101.04	0					53	31	2	0	0	0	3.457e-39	1	63155	189.17
	QELIKEYLELEK	12	Unmodified	_QELIKEYLELEK_					0	0	0	1	HEXI1_HUMANProteinHEXIM1	HEXI1_HUMANProteinHEXIM1	HEXI1_HUMANProteinHEXIM1	MULTI-MSMS	FU20160819-04	512.285	3	512.284	1533.83	85071.1	3.7447	0.0019184	-1.1303	-0.00057901	2.6144	0.0013393	512.283	101.31	0.47314	101.31	101.19	101.66	0					118	47	4	0	0	0	0.00091678	1	63463	160.72
	QELIKEYLELEK	12	Unmodified	_QELIKEYLELEK_					0	0	0	1	HEXI1_HUMANProteinHEXIM1	HEXI1_HUMANProteinHEXIM1	HEXI1_HUMANProteinHEXIM1	MULTI-MSMS	FU20160819-04	767.923	2	767.922	1533.83	72805.1	4.8971	0.0037606	-1.6658	-0.0012792	3.2313	0.0024814	767.92	101.42	0.42488	101.42	101.19	101.61	7.6294e-06					69	42	3	0	0	0	0.007691	1	63482	131.83
	QELIKEYLELEK	12	Unmodified	_QELIKEYLELEK_					0	0	0	1	HEXI1_HUMANProteinHEXIM1	HEXI1_HUMANProteinHEXIM1	HEXI1_HUMANProteinHEXIM1	MULTI-MSMS	FU20160819-04	512.285	3	512.284	1533.83	85020.7	3.8658	0.0019804	-1.2409	-0.00063568	2.6249	0.0013447	512.283	101.81	0.769	101.81	101.5	102.27	-7.6294e-06					155	76	3	0	0	0	0.0005767	1	63808	166.11
	QELIKEYLELEK	12	Unmodified	_QELIKEYLELEK_					0	0	0	1	HEXI1_HUMANProteinHEXIM1	HEXI1_HUMANProteinHEXIM1	HEXI1_HUMANProteinHEXIM1	MULTI-MSMS	FU20160819-04	512.285	3	512.284	1533.83	85071.1	3.8685	0.0019818	-1.0958	-0.00056135	2.7727	0.0014204	512.283	102.13	0.28787	102.13	101.98	102.27	-7.6294e-06					49	28	2	0	0	0	0.001076	1	64134	139.76
	QELIKEYLELEK	12	Unmodified	_QELIKEYLELEK_					0	0	0	1	HEXI1_HUMANProteinHEXIM1	HEXI1_HUMANProteinHEXIM1	HEXI1_HUMANProteinHEXIM1	MULTI-MSMS	FU20160819-04	767.923	2	767.922	1533.83	71432.7	4.9367	0.003791	-1.7549	-0.0013476	3.1818	0.0024434	768.422	102.8	0.21828	102.8	102.69	102.91	0					48	21	3	0	0	0	7.8668e-23	1	64755	181.53
	QELIKEYLELEK	12	Unmodified	_QELIKEYLELEK_					0	0	0	1	HEXI1_HUMANProteinHEXIM1	HEXI1_HUMANProteinHEXIM1	HEXI1_HUMANProteinHEXIM1	MULTI-MSMS	FU20160819-04	512.284	3	512.284	1533.83	85071.1	3.8239	0.0019589	-1.1595	-0.00059401	2.6643	0.0013649	512.283	102.73	0.74361	102.73	102.27	103.02	0					166	78	4	0	0	0	0.00099283	1	64766	139.76
	QELIKEYLELEK	12	Unmodified	_QELIKEYLELEK_					0	0	0	1	HEXI1_HUMANProteinHEXIM1	HEXI1_HUMANProteinHEXIM1	HEXI1_HUMANProteinHEXIM1	MULTI-MSMS	FU20160819-04	512.285	3	512.284	1533.83	85071.1	3.7978	0.0019455	-1.0775	-0.00055199	2.7203	0.0013935	512.283	103.14	0.20216	103.14	103.02	103.22	0					74	20	4	0	0	0	5.5108e-23	1	65098	210.44
	QELIKEYLELEK	12	Unmodified	_QELIKEYLELEK_					0	0	0	1	HEXI1_HUMANProteinHEXIM1	HEXI1_HUMANProteinHEXIM1	HEXI1_HUMANProteinHEXIM1	MULTI-MSMS	FU20160819-04	768.426	2	767.922	1533.83	72083.9	4.8518	0.0037258	-1.4753	-0.0011329	3.3765	0.0025929	768.422	103.43	0.22339	103.43	103.26	103.49	0					50	24	3	0	0	0	0.00028179	1	65416	155.53
	QELIKEYLELEK	12	Unmodified	_QELIKEYLELEK_					0	0	0	1	HEXI1_HUMANProteinHEXIM1	HEXI1_HUMANProteinHEXIM1	HEXI1_HUMANProteinHEXIM1	MULTI-MSMS	FU20160819-04	512.619	3	512.284	1533.83	85020.7	3.6868	0.0018887	-0.92329	-0.00047299	2.7635	0.0014157	512.283	103.48	0.26633	103.48	103.31	103.57	0					51	29	3	0	0	0	2.7533e-06	1	65426	170.4
	QELIKEYLELEK	12	Unmodified	_QELIKEYLELEK_					0	0	0	1	HEXI1_HUMANProteinHEXIM1	HEXI1_HUMANProteinHEXIM1	HEXI1_HUMANProteinHEXIM1	MULTI-MSMS	FU20160819-04	512.285	3	512.284	1533.83	85071.1	3.5741	0.001831	-0.55808	-0.00028589	3.0161	0.0015451	512.283	103.76	0.3521	103.76	103.57	103.92	0					87	40	4	0	0	0	0.0036337	1	65746	117.2
	QELIKEYLELEK	12	Unmodified	_QELIKEYLELEK_					0	0	0	1	HEXI1_HUMANProteinHEXIM1	HEXI1_HUMANProteinHEXIM1	HEXI1_HUMANProteinHEXIM1	MULTI-MSMS	FU20160819-04	512.285	3	512.284	1533.83	85071.1	3.3705	0.0017266	-0.47413	-0.00024289	2.8963	0.0014837	512.283	104.18	0.34831	104.18	104.04	104.39	0					55	35	2	0	0	0	0.00017447	1	66061	153.74
	QELIKEYLELEK	12	Unmodified	_QELIKEYLELEK_					0	0	0	1	HEXI1_HUMANProteinHEXIM1	HEXI1_HUMANProteinHEXIM1	HEXI1_HUMANProteinHEXIM1	MULTI-MSMS	FU20160819-04	767.924	2	767.922	1533.83	71805.6	4.647	0.0035686	-1.2418	-0.00095359	3.4053	0.002615	767.921	104.1	0.24255	104.1	103.97	104.21	0					36	25	2	0	0	0	6.3972e-09	1	66101	163.9
	QELIKEYLELEK	12	Unmodified	_QELIKEYLELEK_					0	0	0	1	HEXI1_HUMANProteinHEXIM1	HEXI1_HUMANProteinHEXIM1	HEXI1_HUMANProteinHEXIM1	MULTI-MSMS	FU20160819-04	767.924	2	767.922	1533.83	71805.6	4.4821	0.0034419	-1.0032	-0.00077038	3.4789	0.0026715	767.921	104.43	0.23314	104.43	104.28	104.51	0					32	23	2	0	0	0	2.1148e-64	1	66443	201.09
	QELIKEYLELEK	12	Unmodified	_QELIKEYLELEK_					0	0	0	1	HEXI1_HUMANProteinHEXIM1	HEXI1_HUMANProteinHEXIM1	HEXI1_HUMANProteinHEXIM1	MULTI-MSMS	FU20160819-04	512.285	3	512.284	1533.83	85071.1	3.2954	0.0016882	-0.70374	-0.00036051	2.5917	0.0013277	512.283	104.62	0.65874	104.62	104.39	105.05	0					172	67	4	0	0	0	0.00079983	1	66718	150.09
	QELIKEYLELEK	12	Unmodified	_QELIKEYLELEK_					0	0	0	1	HEXI1_HUMANProteinHEXIM1	HEXI1_HUMANProteinHEXIM1	HEXI1_HUMANProteinHEXIM1	MULTI-MSMS	FU20160819-04	512.285	3	512.284	1533.83	85071.1	3.3528	0.0017176	-0.48333	-0.0002476	2.8695	0.00147	512.283	105.16	0.17633	105.16	105.03	105.21	0					54	19	4	0	0	0	1.389e-05	1	67056	166.11
	QELIKEYLELEK	12	Unmodified	_QELIKEYLELEK_					0	0	0	1	HEXI1_HUMANProteinHEXIM1	HEXI1_HUMANProteinHEXIM1	HEXI1_HUMANProteinHEXIM1	MULTI-MSMS	FU20160819-04	512.285	3	512.284	1533.83	85071.1	3.4781	0.0017818	-0.70186	-0.00035955	2.7762	0.0014222	512.283	106	0.31313	106	105.84	106.15	0					64	30	4	0	0	0	0.0008155	1	67655	124.12
	QELIKEYLELEK	12	Unmodified	_QELIKEYLELEK_					0	0	0	1	HEXI1_HUMANProteinHEXIM1	HEXI1_HUMANProteinHEXIM1	HEXI1_HUMANProteinHEXIM1	MULTI-MSMS	FU20160819-04	512.285	3	512.284	1533.83	85071.1	3.5124	0.0017993	-0.63343	-0.0003245	2.879	0.0014748	512.283	106.22	0.31786	106.22	106.11	106.43	0					90	30	4	0	0	0	0.00070143	1	67915	164.48
	QELIKEYLELEK	12	Unmodified	_QELIKEYLELEK_					0	0	0	1	HEXI1_HUMANProteinHEXIM1	HEXI1_HUMANProteinHEXIM1	HEXI1_HUMANProteinHEXIM1	MULTI-MSMS	FU20160819-04	512.285	3	512.284	1533.83	85071.1	3.5911	0.0018397	-0.83904	-0.00042983	2.7521	0.0014098	512.283	107.38	0.34457	107.38	107.24	107.58	-7.6294e-06					114	34	4	0	0	0	0.00013442	1	68885	159.44
	QELIKEYLELEK	12	Unmodified	_QELIKEYLELEK_					0	0	0	1	HEXI1_HUMANProteinHEXIM1	HEXI1_HUMANProteinHEXIM1	HEXI1_HUMANProteinHEXIM1	MULTI-MSMS	FU20160819-04	512.285	3	512.284	1533.83	85071.1	3.608	0.0018483	-0.82322	-0.00042172	2.7848	0.0014266	512.618	107.78	0.50846	107.78	107.57	108.08	0					158	51	4	0	0	0	0.0016237	2	69500	135.1
	QELIKEYLELEK	12	Unmodified	_QELIKEYLELEK_					0	0	0	1	HEXI1_HUMANProteinHEXIM1	HEXI1_HUMANProteinHEXIM1	HEXI1_HUMANProteinHEXIM1	MULTI-MSMS	FU20160819-04	767.923	2	767.922	1533.83	72405.6	4.7872	0.0036762	-1.3071	-0.0010038	3.4801	0.0026724	767.921	108.19	0.38963	108.19	108.08	108.47	0					61	38	3	0	0	0	0.009254	1	69795	131.12
	QELIKEYLELEK	12	Unmodified	_QELIKEYLELEK_					0	0	0	1	HEXI1_HUMANProteinHEXIM1	HEXI1_HUMANProteinHEXIM1	HEXI1_HUMANProteinHEXIM1	MULTI-MSMS	FU20160819-04	512.619	3	512.284	1533.83	85071.1	3.6247	0.0018569	-0.66219	-0.00033923	2.9625	0.0015177	512.283	108.22	0.40918	108.22	108.06	108.47	7.6294e-06					127	40	4	0	0	0	0.00088069	1	69817	134.18
	QELIKEYLELEK	12	Unmodified	_QELIKEYLELEK_					0	0	0	1	HEXI1_HUMANProteinHEXIM1	HEXI1_HUMANProteinHEXIM1	HEXI1_HUMANProteinHEXIM1	MULTI-MSMS	FU20160819-04	512.619	3	512.284	1533.83	85071.1	3.6264	0.0018577	-0.73075	-0.00037435	2.8956	0.0014834	512.283	108.73	0.28852	108.73	108.55	108.84	0					87	30	4	0	0	0	0.000424	1	70133	169.65
	QELIKEYLELEK	12	Unmodified	_QELIKEYLELEK_					0	0	0	1	HEXI1_HUMANProteinHEXIM1	HEXI1_HUMANProteinHEXIM1	HEXI1_HUMANProteinHEXIM1	MULTI-MSMS	FU20160819-04	767.924	2	767.922	1533.83	71443.4	4.85	0.0037244	-1.5094	-0.0011591	3.3406	0.0025653	767.92	108.74	0.22408	108.74	108.62	108.84	0					35	23	2	0	0	0	0.032375	1	70155	109.16
	QELIKEYLELEK	12	Unmodified	_QELIKEYLELEK_					0	0	0	1	HEXI1_HUMANProteinHEXIM1	HEXI1_HUMANProteinHEXIM1	HEXI1_HUMANProteinHEXIM1	MULTI-MSMS	FU20160819-04	512.62	3	512.284	1533.83	85020.7	3.627	0.0018581	-1.106	-0.00056661	2.521	0.0012915	512.283	109.1	0.23969	109.1	108.94	109.18	0					71	26	3	0	0	0	0.0015219	1	70435	138.42
	QELIKEYLELEK	12	Unmodified	_QELIKEYLELEK_					0	0	0	1	HEXI1_HUMANProteinHEXIM1	HEXI1_HUMANProteinHEXIM1	HEXI1_HUMANProteinHEXIM1	MULTI-MSMS	FU20160819-04	512.285	3	512.284	1533.83	85020.7	3.6273	0.0018582	-0.95264	-0.00048802	2.6747	0.0013702	512.283	109.22	0.21896	109.22	109.17	109.39	0					64	25	3	0	0	0	0.0015088	1	70728	147.26
	QELIKEYLELEK	12	Unmodified	_QELIKEYLELEK_					0	0	0	1	HEXI1_HUMANProteinHEXIM1	HEXI1_HUMANProteinHEXIM1	HEXI1_HUMANProteinHEXIM1	MULTI-MSMS	FU20160819-04	512.284	3	512.284	1533.83	84824.9	3.6281	0.0018586	-0.69675	-0.00035693	2.9313	0.0015017	512.283	109.5	0.39595	109.5	109.35	109.75	0					106	45	4	0	0	0	0.00022413	1	71049	145.14
	QELIKEYLELEK	12	Unmodified	_QELIKEYLELEK_					0	0	0	1	HEXI1_HUMANProteinHEXIM1	HEXI1_HUMANProteinHEXIM1	HEXI1_HUMANProteinHEXIM1	MULTI-MSMS	FU20160819-04	512.62	3	512.284	1533.83	85071.1	3.6294	0.0018593	-0.95955	-0.00049156	2.6698	0.0013677	512.283	110.09	0.18394	110.09	110.04	110.22	0					58	18	4	0	0	0	0.00021605	1	71358	160.86
	QELIKEYLELEK	12	Unmodified	_QELIKEYLELEK_					0	0	0	1	HEXI1_HUMANProteinHEXIM1	HEXI1_HUMANProteinHEXIM1	HEXI1_HUMANProteinHEXIM1	MULTI-MSMS	FU20160819-04	512.285	3	512.284	1533.83	85020.7	3.63	0.0018596	-0.93976	-0.00048143	2.6903	0.0013782	512.283	110.38	0.26427	110.38	110.21	110.47	0					54	28	3	0	0	0	9.0327e-09	1	71669	187.85
	QELIKEYLELEK	12	Unmodified	_QELIKEYLELEK_					0	0	0	1	HEXI1_HUMANProteinHEXIM1	HEXI1_HUMANProteinHEXIM1	HEXI1_HUMANProteinHEXIM1	MULTI-MSMS	FU20160819-04	512.285	3	512.284	1533.83	85071.1	3.6304	0.0018598	-0.75742	-0.00038802	2.873	0.0014718	512.283	110.56	0.29913	110.56	110.45	110.75	0					88	32	4	0	0	0	0.00022039	1	71981	153.34
	QELIKEYLELEK	12	Unmodified	_QELIKEYLELEK_					0	0	0	1	HEXI1_HUMANProteinHEXIM1	HEXI1_HUMANProteinHEXIM1	HEXI1_HUMANProteinHEXIM1	MULTI-MSMS	FU20160819-04	512.62	3	512.284	1533.83	84672.3	3.5171	0.0018018	-0.52453	-0.00026871	2.9926	0.001533	512.618	111.13	0.18768	111.13	111	111.19	-7.6294e-06					60	18	4	0	0	0	0.0030688	1	72258	129.74
	QELIKEYLELEK	12	Unmodified	_QELIKEYLELEK_					0	0	0	1	HEXI1_HUMANProteinHEXIM1	HEXI1_HUMANProteinHEXIM1	HEXI1_HUMANProteinHEXIM1	MULTI-MSMS	FU20160819-04	768.427	2	767.922	1533.83	70389.3	4.5164	0.0034682	-0.83564	-0.0006417	3.6808	0.0028265	768.423	111.52	0.36121	111.52	111.19	111.55	-7.6294e-06					60	35	2	0	0	0	1.9133e-51	1	72448	198.62
	QELIKEYLELEK	12	Unmodified	_QELIKEYLELEK_					0	0	0	1	HEXI1_HUMANProteinHEXIM1	HEXI1_HUMANProteinHEXIM1	HEXI1_HUMANProteinHEXIM1	MULTI-MSMS	FU20160819-04	512.285	3	512.284	1533.83	85020.8	3.3916	0.0017375	-0.4861	-0.00024902	2.9055	0.0014884	512.283	111.52	0.54826	111.52	111.17	111.72	0					130	51	3	0	0	0	0.001076	1	72544	136.53
	QELIKEYLELEK	12	Unmodified	_QELIKEYLELEK_					0	0	0	1	HEXI1_HUMANProteinHEXIM1	HEXI1_HUMANProteinHEXIM1	HEXI1_HUMANProteinHEXIM1	MULTI-MSMS	FU20160819-04	767.923	2	767.922	1533.83	70922.1	4.1692	0.0032017	-0.55784	-0.00042838	3.6114	0.0027733	768.423	112.13	0.31793	112.13	111.94	112.26	0					58	22	4	0	0	0	0	1	73168	277.1
	QELIKEYLELEK	12	Unmodified	_QELIKEYLELEK_					0	0	0	1	HEXI1_HUMANProteinHEXIM1	HEXI1_HUMANProteinHEXIM1	HEXI1_HUMANProteinHEXIM1	MULTI-MSMS	FU20160819-04	512.285	3	512.284	1533.83	84785.2	3.1643	0.001621	-0.3677	-0.00018837	2.7966	0.0014327	512.283	112.22	0.78465	112.22	111.85	112.64	0					155	53	3	0	0	0	3.3317e-06	2	73696	171.67
	QELIKEYLELEK	12	Unmodified	_QELIKEYLELEK_					0	0	0	1	HEXI1_HUMANProteinHEXIM1	HEXI1_HUMANProteinHEXIM1	HEXI1_HUMANProteinHEXIM1	MULTI-MSMS	FU20160819-04	767.924	2	767.922	1533.83	70922.1	4.2082	0.0032316	-1.0763	-0.00082649	3.1319	0.0024051	767.921	112.64	0.53091	112.64	112.26	112.79	7.6294e-06					123	40	4	0	0	0	0	2	73978	366.09
	QELIKEYLELEK	12	Unmodified	_QELIKEYLELEK_					0	0	0	1	HEXI1_HUMANProteinHEXIM1	HEXI1_HUMANProteinHEXIM1	HEXI1_HUMANProteinHEXIM1	MULTI-MSMS	FU20160819-04	512.285	3	512.284	1533.83	84367.4	3.0999	0.001588	-0.36778	-0.00018841	2.7321	0.0013996	512.283	112.78	0.22542	112.78	112.64	112.86	0					86	22	4	0	0	0	0.01589	1	74094	88.803
	QELIKEYLELEK	12	Unmodified	_QELIKEYLELEK_					0	0	0	1	HEXI1_HUMANProteinHEXIM1	HEXI1_HUMANProteinHEXIM1	HEXI1_HUMANProteinHEXIM1	MULTI-MSMS	FU20160819-04	767.924	2	767.922	1533.83	70288.9	4.073	0.0031278	-0.89536	-0.00068757	3.1777	0.0024402	767.921	113.18	0.46393	113.18	112.92	113.39	0					140	48	4	0	0	0	0	1	74312	303.31
	QELIKEYLELEK	12	Unmodified	_QELIKEYLELEK_					0	0	0	1	HEXI1_HUMANProteinHEXIM1	HEXI1_HUMANProteinHEXIM1	HEXI1_HUMANProteinHEXIM1	MULTI-MSMS	FU20160819-04	512.285	3	512.284	1533.83	84729.4	3.0432	0.001559	-0.26028	-0.00013333	2.783	0.0014257	512.283	113.16	0.49314	113.16	112.92	113.41	0					181	51	5	0	0	0	0.00070143	1	74413	126.12
	QELIKEYLELEK	12	Unmodified	_QELIKEYLELEK_					0	0	0	1	HEXI1_HUMANProteinHEXIM1	HEXI1_HUMANProteinHEXIM1	HEXI1_HUMANProteinHEXIM1	MULTI-MSMS	FU20160819-04	767.925	2	767.922	1533.83	70302.7	4.056	0.0031147	-0.90556	-0.0006954	3.1504	0.0024193	767.921	113.57	0.24254	113.57	113.39	113.63	7.6294e-06					98	27	5	0	0	0	4.1341e-216	1	74690	244.16
	QELIKEYLELEK	12	Unmodified	_QELIKEYLELEK_					0	0	0	1	HEXI1_HUMANProteinHEXIM1	HEXI1_HUMANProteinHEXIM1	HEXI1_HUMANProteinHEXIM1	MULTI-MSMS	FU20160819-04	512.285	3	512.284	1533.83	84729.4	2.9793	0.0015263	-0.29252	-0.00014985	2.6868	0.0013764	512.283	113.65	0.55499	113.65	113.39	113.94	0					154	52	5	0	0	0	0.00029922	2	75197	181.66
	QELIKEYLELEK	12	Unmodified	_QELIKEYLELEK_					0	0	0	1	HEXI1_HUMANProteinHEXIM1	HEXI1_HUMANProteinHEXIM1	HEXI1_HUMANProteinHEXIM1	MULTI-MSMS	FU20160819-04	767.923	2	767.922	1533.83	70302.7	4.05	0.00311	-0.90697	-0.00069648	3.143	0.0024136	767.921	113.79	0.30195	113.79	113.62	113.92	0					69	23	4	0	0	0	3.9873e-216	1	75058	244.27
	QELIKEYLELEK	12	Unmodified	_QELIKEYLELEK_					0	0	0	1	HEXI1_HUMANProteinHEXIM1	HEXI1_HUMANProteinHEXIM1	HEXI1_HUMANProteinHEXIM1	MULTI-MSMS	FU20160819-04	767.924	2	767.922	1533.83	70997.4	3.9645	0.0030444	-0.92387	-0.00070946	3.0406	0.0023349	767.921	114.09	0.29021	114.09	113.93	114.22	0					103	32	4	0	0	0	1.6013e-245	1	75465	250.7
	QELIKEYLELEK	12	Unmodified	_QELIKEYLELEK_					0	0	0	1	HEXI1_HUMANProteinHEXIM1	HEXI1_HUMANProteinHEXIM1	HEXI1_HUMANProteinHEXIM1	MULTI-MSMS	FU20160819-04	512.285	3	512.284	1533.83	83638.6	2.8451	0.0014575	0.11469	5.8752e-05	2.9597	0.0015162	512.284	114.43	0.91485	114.43	114.21	115.13	7.6294e-06					298	117	4	0	0	0	2.7533e-06	3	75949	170.4
	QELIKEYLELEK	12	Unmodified	_QELIKEYLELEK_					0	0	0	1	HEXI1_HUMANProteinHEXIM1	HEXI1_HUMANProteinHEXIM1	HEXI1_HUMANProteinHEXIM1	MULTI-MSMS	FU20160819-04	767.927	2	767.922	1533.83	70422.3	3.8893	0.0029866	-0.63935	-0.00049097	3.2499	0.0024957	767.921	114.33	0.41292	114.33	114.21	114.63	-7.6294e-06					139	47	4	0	0	0	0	1	75874	336.92
	QELIKEYLELEK	12	Unmodified	_QELIKEYLELEK_					0	0	0	1	HEXI1_HUMANProteinHEXIM1	HEXI1_HUMANProteinHEXIM1	HEXI1_HUMANProteinHEXIM1	MULTI-MSMS	FU20160819-04	768.425	2	767.922	1533.83	70911.1	3.9619	0.0030424	-1.0069	-0.00077324	2.955	0.0022692	767.921	114.76	0.49503	114.76	114.63	115.12	7.6294e-06					162	68	3	0	0	0	6.1004e-67	1	76102	205.52
	QELIKEYLELEK	12	Unmodified	_QELIKEYLELEK_					0	0	0	1	HEXI1_HUMANProteinHEXIM1	HEXI1_HUMANProteinHEXIM1	HEXI1_HUMANProteinHEXIM1	MULTI-MSMS	FU20160819-04	512.285	3	512.284	1533.83	85022.4	2.4764	0.0012686	0.24286	0.00012441	2.7192	0.001393	512.284	117.69	4.8468	117.69	115.16	120	0					1736	677	3	0	0	0	0.00023531	6	76344	164.48
	QELIKEYLELEK	12	Unmodified	_QELIKEYLELEK_					0	0	0	1	HEXI1_HUMANProteinHEXIM1	HEXI1_HUMANProteinHEXIM1	HEXI1_HUMANProteinHEXIM1	MULTI-MSMS	FU20160819-04	767.923	2	767.922	1533.83	70719.9	3.9511	0.0030341	-1.1024	-0.00084654	2.8487	0.0021876	767.921	115.57	0.13916	115.57	115.54	115.68	0					27	18	2	0	0	0	2.4675e-12	1	76444	166.86
	QELIKEYLELEK	12	Unmodified	_QELIKEYLELEK_					0	0	0	1	HEXI1_HUMANProteinHEXIM1	HEXI1_HUMANProteinHEXIM1	HEXI1_HUMANProteinHEXIM1	MSMS	FU20160819-04	767.924	2	767.922	1533.83	NaN	NaN	NaN	NaN	NaN	NaN	NaN	NaN	72.389	1	72.389	71.889	72.889	7.6294e-06								0	0	0	4.0262e-296	1	36361	231.07
	QELIKEYLELEK	12	Unmodified	_QELIKEYLELEK_					0	0	0	1	HEXI1_HUMANProteinHEXIM1	HEXI1_HUMANProteinHEXIM1	HEXI1_HUMANProteinHEXIM1	MSMS	FU20160819-04	512.285	3	512.284	1533.83	NaN	NaN	NaN	NaN	NaN	NaN	NaN	NaN	77.307	1	77.307	76.807	77.807	0								0	0	0	6.4203e-24	1	40742	155.47
	QELIKEYLELEK	12	Unmodified	_QELIKEYLELEK_					0	0	0	1	HEXI1_HUMANProteinHEXIM1	HEXI1_HUMANProteinHEXIM1	HEXI1_HUMANProteinHEXIM1	MSMS	FU20160819-04	512.284	3	512.284	1533.83	NaN	NaN	NaN	NaN	NaN	NaN	NaN	NaN	77.687	1	77.687	77.187	78.187	0								0	0	0	0.011302	1	41078	131.17
	QELIKEYLELEK	12	Unmodified	_QELIKEYLELEK_					0	0	0	1	HEXI1_HUMANProteinHEXIM1	HEXI1_HUMANProteinHEXIM1	HEXI1_HUMANProteinHEXIM1	MSMS	FU20160819-04	512.285	3	512.284	1533.83	NaN	NaN	NaN	NaN	NaN	NaN	NaN	NaN	78.032	1	78.032	77.532	78.532	0								0	0	0	4.3175e-31	1	41325	171.49
	QELIKEYLELEK	12	Unmodified	_QELIKEYLELEK_					0	0	0	1	HEXI1_HUMANProteinHEXIM1	HEXI1_HUMANProteinHEXIM1	HEXI1_HUMANProteinHEXIM1	MSMS	FU20160819-04	512.285	3	512.284	1533.83	NaN	NaN	NaN	NaN	NaN	NaN	NaN	NaN	79.127	1	79.127	78.627	79.627	0								0	0	0	5.8278e-06	1	42024	139.76
	QELIKEYLELEK	12	Unmodified	_QELIKEYLELEK_					0	0	0	1	HEXI1_HUMANProteinHEXIM1	HEXI1_HUMANProteinHEXIM1	HEXI1_HUMANProteinHEXIM1	MSMS	FU20160819-04	512.285	3	512.284	1533.83	NaN	NaN	NaN	NaN	NaN	NaN	NaN	NaN	79.495	1	79.495	78.995	79.995	0								0	0	0	3.1703e-41	1	42272	181.66
	QELIKEYLELEK	12	Unmodified	_QELIKEYLELEK_					0	0	0	1	HEXI1_HUMANProteinHEXIM1	HEXI1_HUMANProteinHEXIM1	HEXI1_HUMANProteinHEXIM1	MSMS	FU20160819-04	767.925	2	767.922	1533.83	NaN	NaN	NaN	NaN	NaN	NaN	NaN	NaN	79.51	1	79.51	79.01	80.01	0								0	0	0	4.8335e-67	1	42283	171.67
	QELIKEYLELEK	12	Unmodified	_QELIKEYLELEK_					0	0	0	1	HEXI1_HUMANProteinHEXIM1	HEXI1_HUMANProteinHEXIM1	HEXI1_HUMANProteinHEXIM1	MSMS	FU20160819-04	512.286	3	512.284	1533.83	NaN	NaN	NaN	NaN	NaN	NaN	NaN	NaN	79.833	1	79.833	79.333	80.333	-7.6294e-06								0	0	0	4.0307e-81	1	42515	205.12
	QELIKEYLELEK	12	Unmodified	_QELIKEYLELEK_					0	0	0	1	HEXI1_HUMANProteinHEXIM1	HEXI1_HUMANProteinHEXIM1	HEXI1_HUMANProteinHEXIM1	MSMS	FU20160819-04	767.925	2	767.922	1533.83	NaN	NaN	NaN	NaN	NaN	NaN	NaN	NaN	79.858	1	79.858	79.358	80.358	0								0	0	0	4.3656e-207	1	42538	211.37
	QELIKEYLELEK	12	Unmodified	_QELIKEYLELEK_					0	0	0	1	HEXI1_HUMANProteinHEXIM1	HEXI1_HUMANProteinHEXIM1	HEXI1_HUMANProteinHEXIM1	MSMS	FU20160819-04	767.924	2	767.922	1533.83	NaN	NaN	NaN	NaN	NaN	NaN	NaN	NaN	80.306	1	80.306	79.806	80.806	0								0	0	0	4.5368e-97	1	42924	180.19
	QELIKEYLELEK	12	Unmodified	_QELIKEYLELEK_					0	0	0	1	HEXI1_HUMANProteinHEXIM1	HEXI1_HUMANProteinHEXIM1	HEXI1_HUMANProteinHEXIM1	MSMS	FU20160819-04	767.925	2	767.922	1533.83	NaN	NaN	NaN	NaN	NaN	NaN	NaN	NaN	81.388	1	81.388	80.888	81.888	0								0	0	0	2.3143e-135	1	43976	193.3
	QELIKEYLELEK	12	Unmodified	_QELIKEYLELEK_					0	0	0	1	HEXI1_HUMANProteinHEXIM1	HEXI1_HUMANProteinHEXIM1	HEXI1_HUMANProteinHEXIM1	MSMS	FU20160819-04	767.924	2	767.922	1533.83	NaN	NaN	NaN	NaN	NaN	NaN	NaN	NaN	82.21	1	82.21	81.71	82.71	0								0	0	0	0	1	44775	262.07
	QELIKEYLELEK	12	Unmodified	_QELIKEYLELEK_					0	0	0	1	HEXI1_HUMANProteinHEXIM1	HEXI1_HUMANProteinHEXIM1	HEXI1_HUMANProteinHEXIM1	MSMS	FU20160819-04	767.928	2	767.922	1533.83	NaN	NaN	NaN	NaN	NaN	NaN	NaN	NaN	82.55	1	82.55	82.05	83.05	-7.6294e-06								0	0	0	0.0033044	1	45062	120.86
	QELIKEYLELEK	12	Unmodified	_QELIKEYLELEK_					0	0	0	1	HEXI1_HUMANProteinHEXIM1	HEXI1_HUMANProteinHEXIM1	HEXI1_HUMANProteinHEXIM1	MSMS	FU20160819-04	767.924	2	767.922	1533.83	NaN	NaN	NaN	NaN	NaN	NaN	NaN	NaN	83.41	1	83.41	82.91	83.91	0								0	0	0	2.3528e-16	1	45931	139.15
	QELIKEYLELEK	12	Unmodified	_QELIKEYLELEK_					0	0	0	1	HEXI1_HUMANProteinHEXIM1	HEXI1_HUMANProteinHEXIM1	HEXI1_HUMANProteinHEXIM1	MSMS	FU20160819-04	767.924	2	767.922	1533.83	NaN	NaN	NaN	NaN	NaN	NaN	NaN	NaN	85.441	1	85.441	84.941	85.941	0								0	0	0	0.0040748	1	48015	119.74
	QELIKEYLELEK	12	Unmodified	_QELIKEYLELEK_					0	0	0	1	HEXI1_HUMANProteinHEXIM1	HEXI1_HUMANProteinHEXIM1	HEXI1_HUMANProteinHEXIM1	MSMS	FU20160819-04	767.923	2	767.922	1533.83	NaN	NaN	NaN	NaN	NaN	NaN	NaN	NaN	87.609	1	87.609	87.109	88.109	0								0	0	0	5.0999e-41	1	50212	156.58
	QELIKEYLELEK	12	Unmodified	_QELIKEYLELEK_					0	0	0	1	HEXI1_HUMANProteinHEXIM1	HEXI1_HUMANProteinHEXIM1	HEXI1_HUMANProteinHEXIM1	MSMS	FU20160819-04	767.923	2	767.922	1533.83	NaN	NaN	NaN	NaN	NaN	NaN	NaN	NaN	88.318	1	88.318	87.818	88.818	-7.6294e-06								0	0	0	2.3143e-135	1	50946	193.3
	QELIKEYLELEK	12	Unmodified	_QELIKEYLELEK_					0	0	0	1	HEXI1_HUMANProteinHEXIM1	HEXI1_HUMANProteinHEXIM1	HEXI1_HUMANProteinHEXIM1	MSMS	FU20160819-04	512.285	3	512.284	1533.83	NaN	NaN	NaN	NaN	NaN	NaN	NaN	NaN	91.282	1	91.282	90.782	91.782	0								0	0	0	3.358e-11	1	53975	153.74
	QELIKEYLELEK	12	Unmodified	_QELIKEYLELEK_					0	0	0	1	HEXI1_HUMANProteinHEXIM1	HEXI1_HUMANProteinHEXIM1	HEXI1_HUMANProteinHEXIM1	MSMS	FU20160819-04	512.285	3	512.284	1533.83	NaN	NaN	NaN	NaN	NaN	NaN	NaN	NaN	91.626	1	91.626	91.126	92.126	0								0	0	0	0.024466	1	54321	144.7
	QELIKEYLELEK	12	Unmodified	_QELIKEYLELEK_					0	0	0	1	HEXI1_HUMANProteinHEXIM1	HEXI1_HUMANProteinHEXIM1	HEXI1_HUMANProteinHEXIM1	MSMS	FU20160819-04	512.285	3	512.284	1533.83	NaN	NaN	NaN	NaN	NaN	NaN	NaN	NaN	91.972	1	91.972	91.472	92.472	0								0	0	0	0.012042	1	54644	138.42
	QELIKEYLELEK	12	Unmodified	_QELIKEYLELEK_					0	0	0	1	HEXI1_HUMANProteinHEXIM1	HEXI1_HUMANProteinHEXIM1	HEXI1_HUMANProteinHEXIM1	MSMS	FU20160819-04	512.285	3	512.284	1533.83	NaN	NaN	NaN	NaN	NaN	NaN	NaN	NaN	92.313	1	92.313	91.813	92.813	0								0	0	0	5.8278e-06	1	54968	150.09
	QELIKEYLELEK	12	Unmodified	_QELIKEYLELEK_					0	0	0	1	HEXI1_HUMANProteinHEXIM1	HEXI1_HUMANProteinHEXIM1	HEXI1_HUMANProteinHEXIM1	MSMS	FU20160819-04	767.924	2	767.922	1533.83	NaN	NaN	NaN	NaN	NaN	NaN	NaN	NaN	92.41	1	92.41	91.91	92.91	-7.6294e-06								0	0	0	3.734e-181	1	55061	205.52
	QELIKEYLELEK	12	Unmodified	_QELIKEYLELEK_					0	0	0	1	HEXI1_HUMANProteinHEXIM1	HEXI1_HUMANProteinHEXIM1	HEXI1_HUMANProteinHEXIM1	MSMS	FU20160819-04	512.285	3	512.284	1533.83	NaN	NaN	NaN	NaN	NaN	NaN	NaN	NaN	92.649	1	92.649	92.149	93.149	0								0	0	0	6.4203e-24	1	55303	170.4
	QELIKEYLELEK	12	Unmodified	_QELIKEYLELEK_					0	0	0	1	HEXI1_HUMANProteinHEXIM1	HEXI1_HUMANProteinHEXIM1	HEXI1_HUMANProteinHEXIM1	MSMS	FU20160819-04	767.923	2	767.922	1533.83	NaN	NaN	NaN	NaN	NaN	NaN	NaN	NaN	96.574	1	96.574	96.074	97.074	7.6294e-06								0	0	0	4.0936e-296	1	58946	231.05
	QELIKEYLELEK	12	Unmodified	_QELIKEYLELEK_					0	0	0	1	HEXI1_HUMANProteinHEXIM1	HEXI1_HUMANProteinHEXIM1	HEXI1_HUMANProteinHEXIM1	MSMS	FU20160819-04	512.285	3	512.284	1533.83	NaN	NaN	NaN	NaN	NaN	NaN	NaN	NaN	97.469	1	97.469	96.969	97.969	0								0	0	0	3.8868e-23	1	59740	177.04
	QELIKEYLELEK	12	Unmodified	_QELIKEYLELEK_					0	0	0	1	HEXI1_HUMANProteinHEXIM1	HEXI1_HUMANProteinHEXIM1	HEXI1_HUMANProteinHEXIM1	MSMS	FU20160819-04	767.925	2	767.922	1533.83	NaN	NaN	NaN	NaN	NaN	NaN	NaN	NaN	97.47	1	97.47	96.97	97.97	0								0	0	0	1.5967e-207	1	59741	213.35
	QELIKEYLELEK	12	Unmodified	_QELIKEYLELEK_					0	0	0	1	HEXI1_HUMANProteinHEXIM1	HEXI1_HUMANProteinHEXIM1	HEXI1_HUMANProteinHEXIM1	MSMS	FU20160819-04	512.285	3	512.284	1533.83	NaN	NaN	NaN	NaN	NaN	NaN	NaN	NaN	98.157	1	98.157	97.657	98.657	0								0	0	0	2.7401e-23	1	60375	166.11
	QELIKEYLELEK	12	Unmodified	_QELIKEYLELEK_					0	0	0	1	HEXI1_HUMANProteinHEXIM1	HEXI1_HUMANProteinHEXIM1	HEXI1_HUMANProteinHEXIM1	MSMS	FU20160819-04	767.927	2	767.922	1533.83	NaN	NaN	NaN	NaN	NaN	NaN	NaN	NaN	98.495	1	98.495	97.995	98.995	0								0	0	0	2.8554e-16	1	60675	138.25
	QELIKEYLELEK	12	Unmodified	_QELIKEYLELEK_					0	0	0	1	HEXI1_HUMANProteinHEXIM1	HEXI1_HUMANProteinHEXIM1	HEXI1_HUMANProteinHEXIM1	MSMS	FU20160819-04	512.285	3	512.284	1533.83	NaN	NaN	NaN	NaN	NaN	NaN	NaN	NaN	98.499	1	98.499	97.999	98.999	0								0	0	0	6.9726e-17	1	60678	165.35
	QELIKEYLELEK	12	Unmodified	_QELIKEYLELEK_					0	0	0	1	HEXI1_HUMANProteinHEXIM1	HEXI1_HUMANProteinHEXIM1	HEXI1_HUMANProteinHEXIM1	MSMS	FU20160819-04	767.924	2	767.922	1533.83	NaN	NaN	NaN	NaN	NaN	NaN	NaN	NaN	98.834	1	98.834	98.334	99.334	0								0	0	0	9.3784e-67	1	61007	170.4
	QELIKEYLELEK	12	Unmodified	_QELIKEYLELEK_					0	0	0	1	HEXI1_HUMANProteinHEXIM1	HEXI1_HUMANProteinHEXIM1	HEXI1_HUMANProteinHEXIM1	MSMS	FU20160819-04	767.925	2	767.922	1533.83	NaN	NaN	NaN	NaN	NaN	NaN	NaN	NaN	99.238	1	99.238	98.738	99.738	0								0	0	0	3.6063e-06	1	61409	129.89
	QELIKEYLELEK	12	Unmodified	_QELIKEYLELEK_					0	0	0	1	HEXI1_HUMANProteinHEXIM1	HEXI1_HUMANProteinHEXIM1	HEXI1_HUMANProteinHEXIM1	MSMS	FU20160819-04	767.924	2	767.922	1533.83	NaN	NaN	NaN	NaN	NaN	NaN	NaN	NaN	99.598	1	99.598	99.098	100.1	7.6294e-06								0	0	0	5.0114e-53	1	61761	161.67
[truncated: 873 more rows]
[truncated: 14 more columns]

## Sheet: HEXIM1 summ.
HEXIM1 Lyssine(s)	Sequence	Modifications	Modified sequence	Charge	MS/MS Count	Arg C sum	Trypsin sum	Raw file
[truncated: 2,029 more rows]
