# Supplementary figures and images for: The HIV-1 Tat protein recruits a ubiquitin ligase to reorganize the 7SK snRNP for transcriptional activation
Source: eLife journal article supplement (doi:10.7554/elife.31879), 2018-05-30

**A**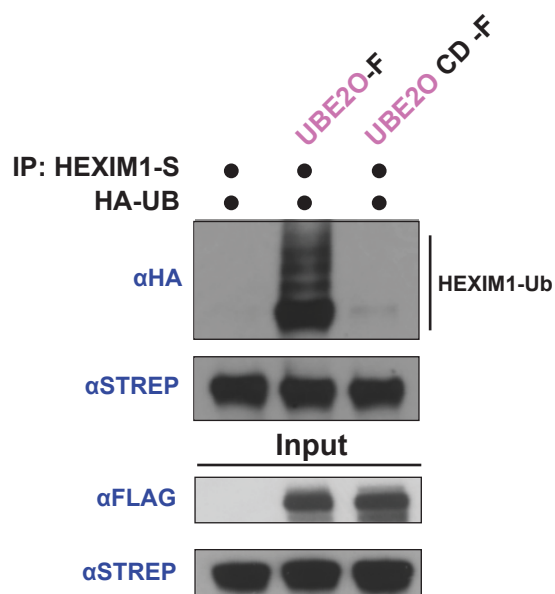**C**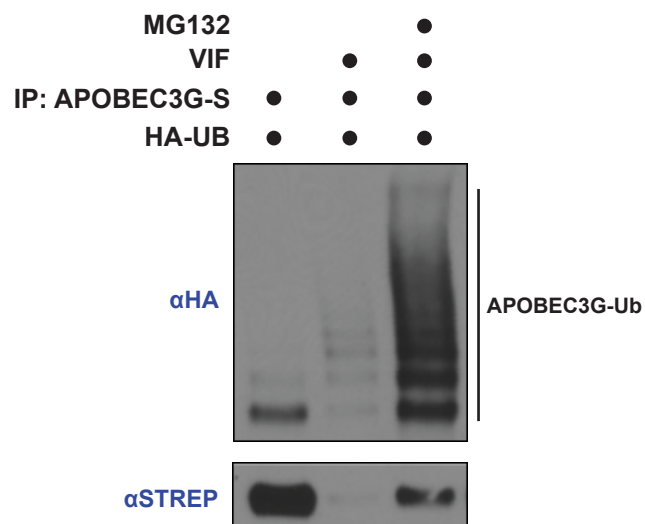**B**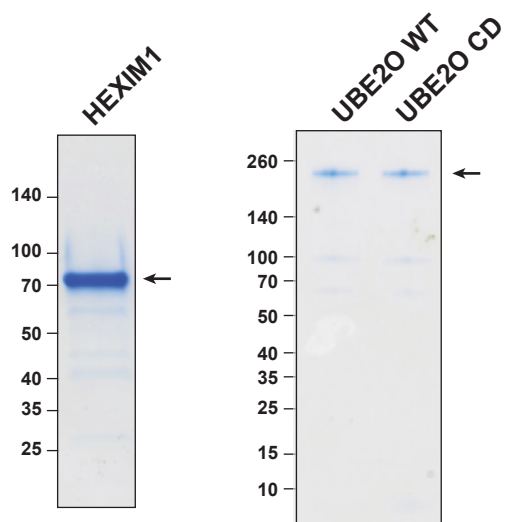**D**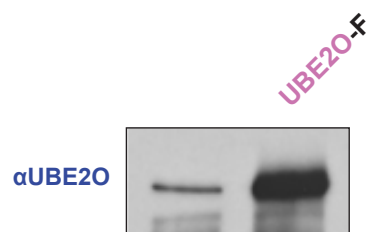

**Figure 3-figure supplement 2**

Supplement: supp [file elife-31879-supp-v1.zip › elife_poa_e31879_Figure_3_figure_supplement_2.pdf]

**A**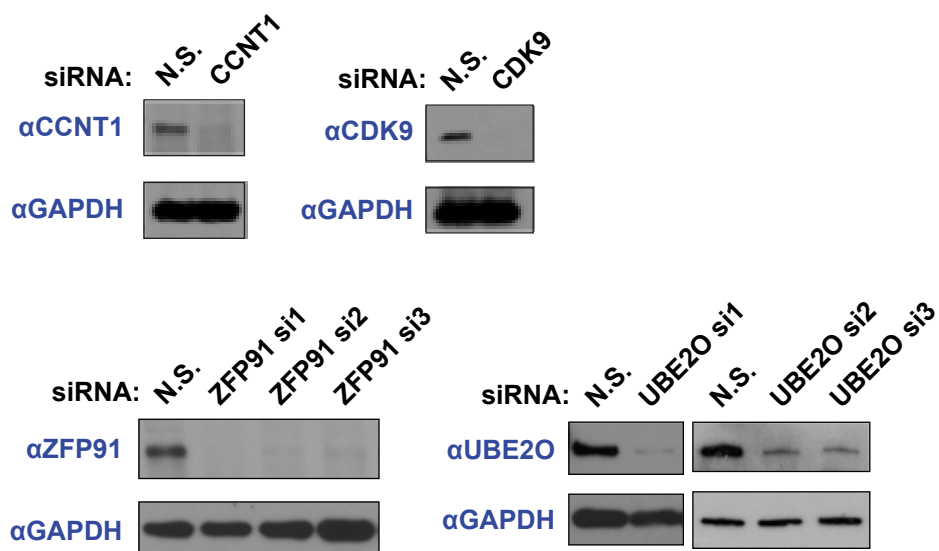**B**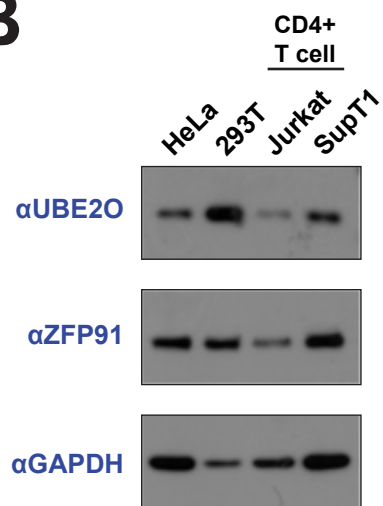

**Figure 1-figure supplement 1**

Supplement: supp [file elife-31879-supp-v1.zip › elife_poa_e31879_Figure_1_figure_supplement_1.pdf]

**A**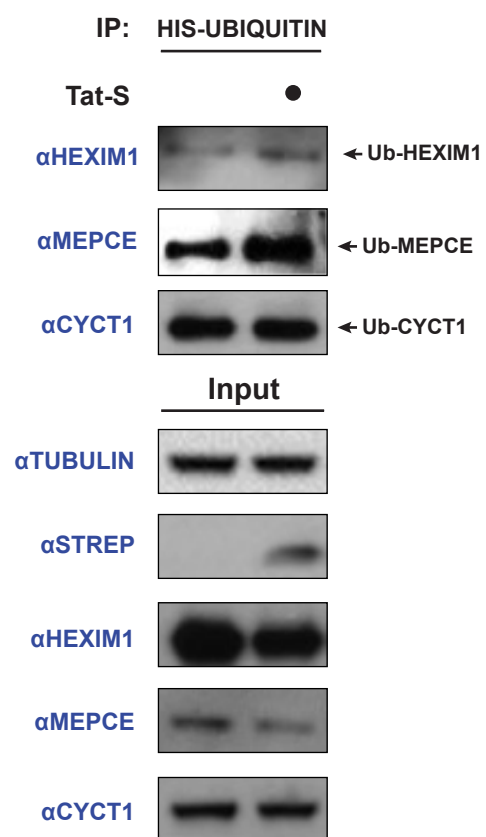**B**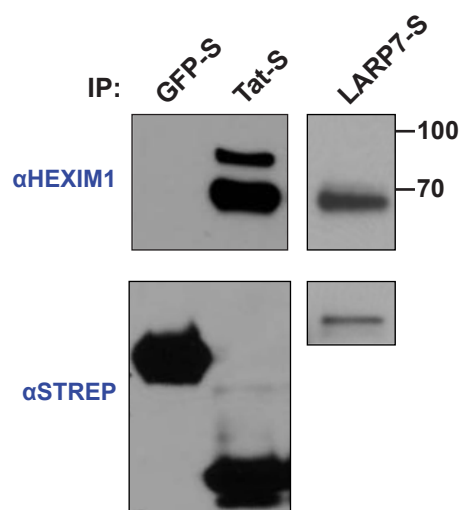

**Figure 3- figure supplement 3**

Supplement: supp [file elife-31879-supp-v1.zip › elife_poa_e31879_Figure_3_figure_supplement_3.pdf]

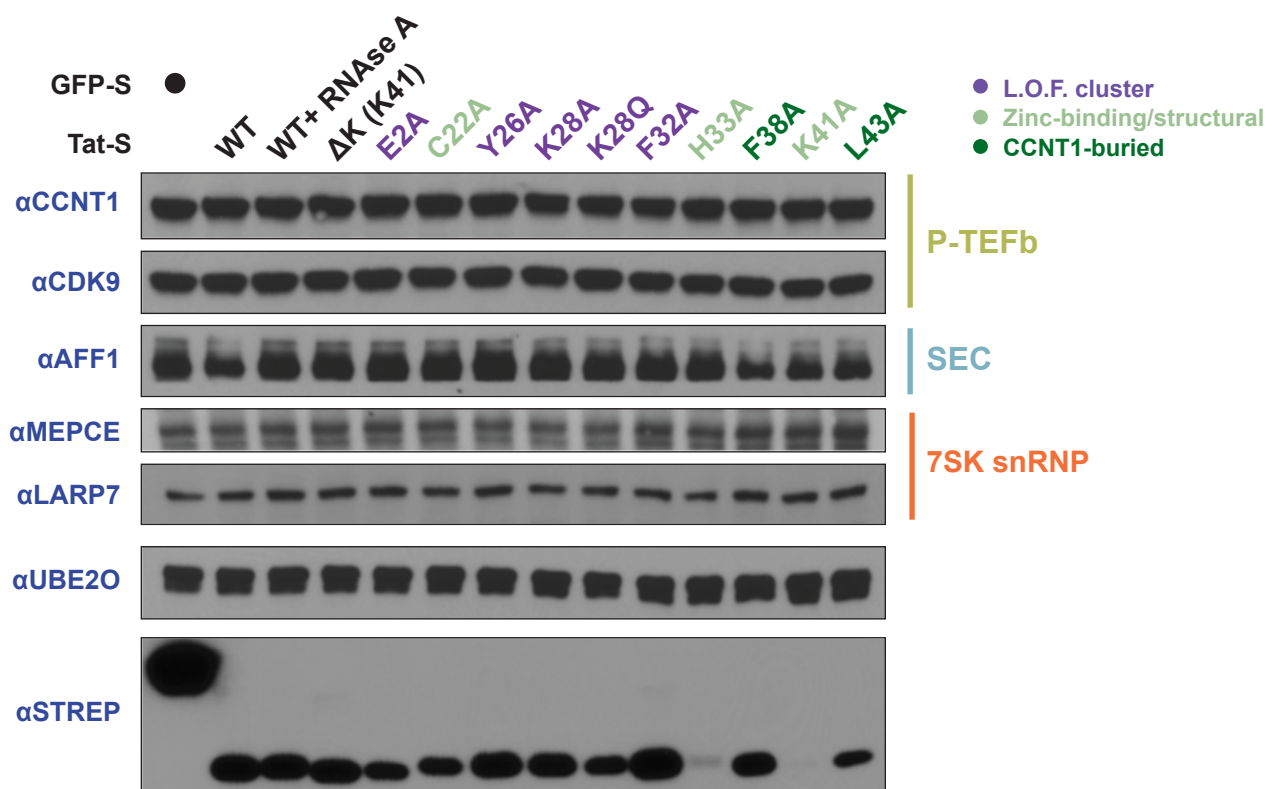

Figure 2-figure supplement 1

Supplement: supp [file elife-31879-supp-v1.zip › elife_poa_e31879_Figure_2_figure_supplement_1.pdf]
